# Supplementary material for: Gene-based burden scores identify rare variant associations for 28 blood biomarkers
Source: Research Square preprint supplement (doi:10.21203/rs.3.rs-2271894/v1), 2023-02-10
Supplement: Supplementary file 1 [file 0583a2251af0db7f6881471e.xlsx]

## Sheet: Table S25 total_bilirubin
Table S25. The summary statitics for the association analysis of total bilirubin.
genes	const_pval	sex	age	bmi	PC1	PC2	PC3	PC4	p_value	beta_coef	std_err	fdr_bh_adj_pval
UGT1A7	0	0	5.66095e-10	1.1012e-257	0.904635	0.453653	0.0574746	0.00427391	2.52066e-41	-0.0120946	0.000897961	4.67733e-37
UGT1A5	0	0	3.98109e-10	4.81697e-258	0.909569	0.475267	0.0692615	0.00211011	8.87905e-35	0.0172798	0.00140431	8.23798e-31
UGT1A1	0	0	7.12956e-10	3.12076e-257	0.936301	0.489812	0.0654967	0.0018422	1.74882e-34	0.0289209	0.00236091	1.0817e-30
MROH2A	0	0	5.39786e-10	2.0538e-258	0.954737	0.489581	0.0579639	0.00220999	1.15126e-18	-0.00380626	0.000431523	5.34068e-15
SLCO1B1	0	0	4.27109e-10	2.58383e-258	0.929552	0.494197	0.0611211	0.00252136	2.42719e-16	0.00621249	0.000757639	9.00778e-13
SLCO1B3	0	0	6.31514e-10	8.86629e-258	0.940843	0.49641	0.0590394	0.00226083	5.56557e-13	0.0067628	0.000937795	1.72124e-09
UGT1A10	0	0	5.8238e-10	6.57687e-258	0.9097	0.49722	0.0615832	0.00182919	2.25205e-09	0.00630801	0.00105505	5.96986e-06
UGT1A8	0	0	5.62787e-10	3.55705e-258	0.919125	0.492418	0.058038	0.00178562	1.47698e-08	-0.00604371	0.00106694	3.42586e-05
UGT1A6	0	0	4.91916e-10	5.85817e-258	0.933738	0.506408	0.0638674	0.00216942	1.75646e-08	0.0150204	0.00266568	3.62143e-05
UGT1A4	0	0	5.14221e-10	7.59114e-258	0.924074	0.514725	0.057808	0.00179052	5.81902e-08	-0.00556432	0.00102576	9.96926e-05
TRPM8	0	0	6.05181e-10	7.90511e-258	0.952533	0.493306	0.0632107	0.002037	5.90978e-08	0.00290076	0.000535019	9.96926e-05
UGT1A9	0	0	4.61818e-10	6.23714e-258	0.957048	0.488092	0.0591713	0.00272686	3.10495e-07	-0.00895186	0.00174937	0.000480129
UGT1A3	0	0	5.14704e-10	5.59155e-258	0.931333	0.495288	0.0599089	0.00198387	6.23721e-07	-0.00551061	0.00110567	0.00089029
DGKD	0	0	5.46992e-10	3.16577e-258	0.918316	0.49185	0.060692	0.0018736	8.30308e-07	-0.00317493	0.000644222	0.00110051
LDLR	0	0	4.68386e-10	7.88354e-258	0.931183	0.487341	0.0607082	0.00196286	2.30503e-05	0.00403053	0.000952118	0.0285148
ATPAF2	0	0	5.16234e-10	1.40229e-257	0.923938	0.489857	0.0606475	0.00207541	3.03687e-05	0.00782623	0.00187643	0.0339909
TMEM203	0	0	4.7788e-10	9.71056e-258	0.927735	0.507479	0.0605832	0.00213349	3.11406e-05	0.0179197	0.00430235	0.0339909
OR10J1	0	0	4.69201e-10	4.24689e-258	0.928779	0.483247	0.0573103	0.00216472	3.91079e-05	0.00335781	0.000816427	0.0403159
UBE2N	0	0	5.43146e-10	5.84878e-258	0.914201	0.493415	0.0607559	0.0020287	5.20222e-05	0.050238	0.0124153	0.0508066
HJURP	0	0	4.70489e-10	1.14312e-257	0.912643	0.492273	0.0611952	0.00214441	0.00011264	-0.00521554	0.00135057	0.104507
PAPD4	0	0	5.3553e-10	1.15415e-257	0.922303	0.495733	0.0629519	0.00219045	0.000134535	0.00411939	0.00107891	0.118878
TAS2R60	0	0	5.36686e-10	5.78539e-258	0.932822	0.481072	0.0606498	0.00197471	0.000143461	0.00953538	0.00250784	0.121003
NCAPG	0	0	5.91315e-10	1.3515e-257	0.934401	0.493703	0.062739	0.00204013	0.000151206	0.0028914	0.000763069	0.121991
FANCD2OS	0	0	5.45058e-10	7.44027e-258	0.936664	0.486944	0.0621895	0.00204904	0.000232052	-0.00467286	0.00126932	0.178897
ZNF837	0	0	6.08796e-10	1.01794e-257	0.909146	0.497552	0.0625706	0.00189577	0.000241023	-0.00226374	0.000616536	0.178897
LRP4	0	0	5.60947e-10	4.22868e-258	0.928351	0.490278	0.0613487	0.0020988	0.00032131	0.00205995	0.000572596	0.229317
PAM	0	0	5.43318e-10	7.13331e-258	0.922449	0.496589	0.0592498	0.00190207	0.000340152	0.00147351	0.000411284	0.233773
CATIP	0	0	5.07034e-10	1.28464e-257	0.928765	0.483327	0.0625923	0.00183158	0.00039246	0.00300026	0.000846292	0.25824
FAM171A1	0	0	5.339e-10	5.74693e-258	0.927296	0.496034	0.0622771	0.00214461	0.000403587	0.00269593	0.000762032	0.25824
PLEKHA8	0	0	5.40207e-10	5.06815e-258	0.927621	0.497246	0.0620989	0.00185051	0.000431887	-0.00279921	0.000795258	0.267136
ALDH1L1	0	0	5.25484e-10	5.05204e-258	0.938233	0.50045	0.0602255	0.00219707	0.000448902	-0.00152807	0.000435395	0.268704
RBBP4	0	0	5.08851e-10	7.44698e-258	0.933858	0.489088	0.0608658	0.00214407	0.00048636	0.025259	0.00724118	0.277397
PAGE5	0	0	5.58534e-10	8.09671e-258	0.924553	0.492627	0.0603038	0.00205216	0.000493323	0.0306278	0.00878989	0.277397
LZTS1	0	0	5.12663e-10	1.47107e-257	0.937718	0.49074	0.0634893	0.00209695	0.000535095	-0.00170515	0.000492444	0.292036
CAPRIN1	0	0	4.86117e-10	7.01618e-258	0.937108	0.504234	0.0594368	0.00200594	0.000622232	0.00507296	0.00148254	0.318114
ZNF433	0	0	5.04082e-10	8.53053e-258	0.919026	0.494008	0.0630865	0.00214809	0.000624658	-0.00282151	0.000824821	0.318114
TEX35	0	0	4.76726e-10	7.26863e-258	0.931714	0.502532	0.0591953	0.00216703	0.000648779	-0.00228988	0.000671434	0.318114
PPIAL4A	0	0	5.44208e-10	6.65948e-258	0.933088	0.497482	0.0614103	0.00208012	0.000660715	-0.00662088	0.0019442	0.318114
ADORA2A	0	0	5.35387e-10	6.22037e-258	0.934819	0.506349	0.0625426	0.00220835	0.000668596	0.00740231	0.00217573	0.318114
ZNF347	0	0	5.79203e-10	1.00712e-257	0.925422	0.496117	0.0604494	0.00173377	0.000687091	-0.00303548	0.000894168	0.318741
RLBP1	0	0	5.20111e-10	6.64078e-258	0.930991	0.491168	0.0593789	0.00215155	0.000728013	0.00286766	0.000848701	0.32945
CNN3	0	0	5.52345e-10	8.56197e-258	0.918535	0.494691	0.0591802	0.00224324	0.000745682	0.00858231	0.00254496	0.32945
HSD3B2	0	0	6.2806e-10	8.03761e-258	0.926227	0.498856	0.062088	0.00178343	0.000786899	0.00432822	0.00128915	0.339574
ELOF1	0	0	5.92058e-10	9.37135e-258	0.927892	0.487028	0.0622486	0.00197763	0.000806714	0.012367	0.00369103	0.340213
FAAH	0	0	4.84424e-10	7.11498e-258	0.927316	0.505301	0.0615239	0.00223949	0.000870792	-0.00283276	0.000850853	0.359076
GATA5	0	0	5.1274e-10	6.11927e-258	0.919542	0.495691	0.0593812	0.00251035	0.000911405	0.00183772	0.000554098	0.364141
ATP1A2	0	0	5.68755e-10	3.92596e-258	0.927106	0.498973	0.0609757	0.00196278	0.000922322	0.00342927	0.00103501	0.364141
OR5R1	0	0	5.15717e-10	7.51284e-258	0.934266	0.49988	0.0615519	0.00200574	0.000968845	0.00301399	0.000913473	0.372796
MBD1	0	0	4.5123e-10	9.10631e-258	0.935244	0.490482	0.0606038	0.00229997	0.000984425	0.00401294	0.00121788	0.372796
GNPNAT1	0	0	5.16746e-10	1.05425e-257	0.92755	0.504782	0.0600803	0.00199519	0.00107434	0.0100246	0.00306529	0.398708
C11orf68	0	0	5.1152e-10	7.82801e-258	0.937657	0.499265	0.0614778	0.00221468	0.00115597	0.00792096	0.00243752	0.408643
SLC39A14	0	0	5.55451e-10	5.53656e-258	0.931192	0.49029	0.0587829	0.00222833	0.00115707	0.00419215	0.00129016	0.408643
MAFB	0	0	5.36993e-10	5.84933e-258	0.915538	0.497802	0.0615201	0.00211664	0.00116717	-0.0122311	0.00376708	0.408643
FAM24B	0	0	5.50009e-10	1.01087e-257	0.923783	0.485842	0.0609416	0.00210443	0.0011893	0.0157359	0.00485452	0.408679
SIRPG	0	0	5.34403e-10	9.77606e-258	0.933055	0.493492	0.0612674	0.0020442	0.00122771	-0.00277618	0.000858854	0.414207
HELZ	0	0	5.23359e-10	5.00422e-258	0.933653	0.503479	0.0618085	0.0019412	0.00128858	0.00248394	0.000771753	0.417389
TMEM9B	0	0	5.40553e-10	1.07904e-257	0.928291	0.489822	0.0626303	0.00215128	0.00129309	0.0092501	0.00287487	0.417389
NCK1	0	0	5.26221e-10	6.40104e-258	0.926917	0.493506	0.0606168	0.00205597	0.00130462	0.00601927	0.00187223	0.417389
PIEZO1	0	0	5.21497e-10	5.06068e-258	0.934389	0.488474	0.0605752	0.0021985	0.00149464	0.000707753	0.000222859	0.465509
CCS	0	0	5.10687e-10	8.44443e-258	0.927792	0.488622	0.0606394	0.00235747	0.0015052	-0.00356947	0.00112469	0.465509
HIST1H4C	0	0	5.204e-10	5.4827e-258	0.932618	0.488429	0.0614708	0.00216985	0.00156795	0.00666972	0.00210943	0.476964
TMPRSS11F	0	0	4.58754e-10	6.13201e-258	0.916375	0.493017	0.0615014	0.00214185	0.00164165	0.00255958	0.000812961	0.491331
AOAH	0	0	5.13894e-10	1.22697e-257	0.945407	0.493007	0.0615178	0.00188808	0.00167697	0.00109751	0.000349276	0.493935
ZNF124	0	0	4.7565e-10	7.13272e-258	0.929048	0.497448	0.0593589	0.00187829	0.00174002	-0.00262124	0.000837079	0.50151
DYRK3	0	0	4.87561e-10	1.05186e-257	0.930602	0.49187	0.0609583	0.00203179	0.00177959	0.00375075	0.00120031	0.50151
OR8B3	0	0	5.23524e-10	7.802e-258	0.927278	0.495334	0.0612524	0.00217556	0.00178377	0.00775968	0.0024838	0.50151
HMGN1	0	0	5.04559e-10	6.38618e-258	0.931264	0.489902	0.0607457	0.00219495	0.00186302	0.00725773	0.0023327	0.502269
STK40	0	0	5.52938e-10	8.23456e-258	0.933448	0.487139	0.0608895	0.00194865	0.00187053	0.00374735	0.00120489	0.502269
DGKZ	0	0	4.94512e-10	9.91323e-258	0.924425	0.491695	0.0613197	0.00205463	0.00189193	0.00142095	0.000457375	0.502269
SERPINA7	0	0	5.15637e-10	6.63748e-258	0.934648	0.493512	0.0593652	0.00209877	0.00189474	0.0102173	0.00328922	0.502269
ZNF708	0	0	5.26423e-10	4.67843e-258	0.933575	0.493216	0.0602884	0.00196794	0.00193133	0.00293408	0.00094628	0.504757
ARHGEF5	0	0	4.54514e-10	9.50193e-258	0.918681	0.487926	0.0610725	0.00216164	0.00200359	-0.00181975	0.000588964	0.51637
TOX	0	0	5.34585e-10	8.77177e-258	0.94245	0.482778	0.0608104	0.00210463	0.00204042	0.00310212	0.00100577	0.51813
CDH6	0	0	5.47153e-10	7.9023e-258	0.919324	0.493534	0.0608579	0.00206974	0.00206626	0.00458108	0.00148708	0.51813
ZNF570	0	0	5.40706e-10	5.13947e-258	0.912273	0.489186	0.0611171	0.00223203	0.00212383	-0.00510436	0.00166136	0.519811
TSPYL6	0	0	4.88996e-10	9.72488e-258	0.912336	0.508084	0.0613286	0.00211468	0.00212899	-0.00651167	0.00211991	0.519811
HCAR1	0	0	5.14465e-10	8.08161e-258	0.917791	0.49161	0.0598283	0.00208561	0.0022992	-0.00334708	0.00109789	0.554078
KDM4C	0	0	5.59437e-10	7.23577e-258	0.916179	0.487099	0.06268	0.00200609	0.00244736	-0.00293652	0.000969204	0.56529
USP30	0	0	4.86183e-10	1.22478e-257	0.931489	0.505022	0.0625743	0.00206993	0.00257061	-0.0029589	0.000981409	0.56529
IRX6	0	0	5.45611e-10	5.31429e-258	0.929358	0.490951	0.0616951	0.0020994	0.00260356	0.00302609	0.00100498	0.56529
GPSM1	0	0	5.42886e-10	6.26048e-258	0.926747	0.491024	0.0588623	0.00219409	0.00260635	0.0024438	0.000811687	0.56529
SSR2	0	0	5.72182e-10	1.00506e-257	0.92133	0.501306	0.0644092	0.0021353	0.00261545	0.00736738	0.00244787	0.56529
HAUS8	0	0	5.18229e-10	1.04326e-257	0.941849	0.499848	0.0624532	0.00203114	0.00262641	0.00622266	0.0020684	0.56529
PPP6C	0	0	4.89166e-10	8.19408e-258	0.935808	0.498981	0.0612428	0.0021868	0.00266139	0.00956262	0.00318286	0.56529
HOXC9	0	0	5.48349e-10	7.30673e-258	0.927093	0.49529	0.0610646	0.00211084	0.00266973	0.00693135	0.00230779	0.56529
RP2	0	0	5.41383e-10	1.19277e-257	0.927297	0.49418	0.0609262	0.00213132	0.00267992	0.00877336	0.00292221	0.56529
UMOD	0	0	5.6418e-10	6.53267e-258	0.922705	0.486069	0.0612826	0.00208425	0.0027531	-0.0028024	0.000935977	0.56529
RBBP8	0	0	4.86673e-10	7.35233e-258	0.930613	0.497129	0.0617725	0.00205124	0.002788	0.00223165	0.000746309	0.56529
ZNF573	0	0	4.85884e-10	8.42518e-258	0.928257	0.494041	0.0602709	0.00201722	0.00279074	0.00332142	0.00111086	0.56529
MYL12B	0	0	5.21595e-10	7.11169e-258	0.936373	0.491468	0.0617966	0.00214783	0.00279368	0.0157263	0.00526031	0.56529
KLRG2	0	0	5.0852e-10	9.02913e-258	0.933714	0.493812	0.0600572	0.0020447	0.00283429	0.00240972	0.00080722	0.56529
PKHD1L1	0	0	5.1054e-10	8.87378e-258	0.917862	0.494368	0.0626898	0.00194511	0.00284322	-0.000690085	0.000231243	0.56529
DNAH9	0	0	5.39991e-10	5.95161e-258	0.932743	0.499365	0.0602639	0.00204843	0.00287919	-0.000921876	0.000309313	0.56529
DCP1B	0	0	5.27629e-10	5.71632e-258	0.917385	0.494217	0.0605491	0.00221992	0.00291049	0.00349817	0.00117503	0.56529
ASTE1	0	0	5.42158e-10	9.8245e-258	0.92834	0.500485	0.0613407	0.00194795	0.0029281	-0.00338369	0.00113728	0.56529
GNGT1	0	0	4.76462e-10	7.41397e-258	0.931224	0.495573	0.0623122	0.00207917	0.00300932	0.0114863	0.00387159	0.56529
GOLGA6D	0	0	5.07429e-10	7.04228e-258	0.93685	0.490312	0.0605813	0.00209441	0.00305009	-0.0022948	0.000774565	0.56529
GNB3	0	0	4.95344e-10	8.31499e-258	0.925775	0.495604	0.0601314	0.00200573	0.00305397	0.00379083	0.00127969	0.56529
TET2	0	0	4.37164e-10	1.12883e-257	0.950984	0.49301	0.0605696	0.00213223	0.00307619	0.00215457	0.000727879	0.56529
SLC39A5	0	0	5.53607e-10	7.27378e-258	0.915584	0.498064	0.0617759	0.00196739	0.00310006	-0.00260121	0.000879473	0.56529
ACLY	0	0	5.13141e-10	6.74414e-258	0.94072	0.49254	0.0595697	0.00221937	0.00310168	0.00190364	0.000643659	0.56529
GPR22	0	0	5.47616e-10	5.90864e-258	0.930643	0.499971	0.0619218	0.00202312	0.0031167	0.00901007	0.00304802	0.56529
RSPO1	0	0	5.50736e-10	4.7614e-258	0.925301	0.497101	0.060094	0.00212189	0.00315016	0.0044565	0.00150927	0.56529
ASH2L	0	0	5.25762e-10	4.97637e-258	0.913118	0.489616	0.0608527	0.00201357	0.00316826	-0.00623907	0.00211424	0.56529
AP1M2	0	0	5.11122e-10	5.79546e-258	0.919044	0.491638	0.0602793	0.00216858	0.00331987	0.00244576	0.000832883	0.581946
FNDC10	0	0	4.98317e-10	9.92395e-258	0.931602	0.501575	0.0623457	0.0020367	0.00332433	-0.00893307	0.00304251	0.581946
FAM167A	0	0	4.95454e-10	4.21145e-258	0.923628	0.495996	0.0620585	0.00207343	0.00344291	0.00421777	0.00144187	0.597072
ALCAM	0	0	5.07893e-10	9.37246e-258	0.926805	0.498734	0.0615796	0.0020299	0.00364874	0.00341115	0.00117339	0.619852
OSBPL3	0	0	5.48843e-10	4.69281e-258	0.924403	0.500885	0.0632525	0.00193049	0.00364977	-0.00239378	0.000823455	0.619852
PID1	0	0	5.4297e-10	5.86963e-258	0.927553	0.492648	0.0610557	0.00213784	0.00367448	0.00424675	0.00146193	0.619852
ICA1L	0	0	5.03496e-10	6.44774e-258	0.929184	0.495861	0.0613393	0.00211525	0.00373093	0.00342666	0.00118156	0.623704
PTPN3	0	0	5.51216e-10	8.39795e-258	0.915619	0.495427	0.0603317	0.00218652	0.00399925	0.00205024	0.000712317	0.66259
RHAG	0	0	5.03317e-10	9.88272e-258	0.932595	0.497338	0.0627992	0.00175721	0.00410834	0.00490312	0.00170854	0.665352
KHDC1	0	0	5.02974e-10	1.09782e-257	0.931657	0.493885	0.0621923	0.00183428	0.00413769	0.00441589	0.00153997	0.665352
C15orf53	0	0	5.27801e-10	6.72963e-258	0.931521	0.493258	0.0607665	0.00205098	0.00414661	0.0131599	0.0045904	0.665352
CGN	0	0	5.06257e-10	6.52262e-258	0.928441	0.493499	0.060496	0.00200788	0.00415935	-0.000821392	0.000286613	0.665352
CCNC	0	0	5.31659e-10	1.13138e-257	0.940632	0.494751	0.0592567	0.00206795	0.00429491	-0.00957376	0.00335252	0.665932
C1QC	0	0	5.6297e-10	7.01106e-258	0.930828	0.485994	0.0602128	0.00204431	0.00430127	0.00474289	0.00166113	0.665932
ATP6V1H	0	0	5.2418e-10	4.25686e-258	0.925959	0.487756	0.0614714	0.00213389	0.00435577	0.00272435	0.000955502	0.665932
WASHC2A	0	0	5.45835e-10	6.5594e-258	0.932037	0.492487	0.0602231	0.00234142	0.00435786	-0.00191108	0.000670304	0.665932
SCUBE3	0	0	5.41984e-10	6.91726e-258	0.92863	0.490962	0.0620853	0.00187034	0.00436109	-0.00197658	0.000693334	0.665932
ZMPSTE24	0	0	5.38204e-10	7.03094e-258	0.936447	0.488758	0.0589044	0.00195816	0.0043783	-0.00459803	0.00161358	0.665932
TP53RK	0	0	5.11826e-10	9.60378e-258	0.932498	0.502083	0.0592653	0.00204728	0.00441513	0.00564714	0.0019836	0.666075
FAAH2	0	0	5.34554e-10	5.99269e-258	0.922963	0.492968	0.0616567	0.00194669	0.0044915	0.00143406	0.000504693	0.672132
BORA	0	0	4.97358e-10	7.24766e-258	0.919398	0.493264	0.0601103	0.0020641	0.00456425	0.0017522	0.000617772	0.677553
VN1R1	0	0	4.97772e-10	4.45908e-258	0.914278	0.495878	0.0617495	0.00216051	0.00460621	-0.0108699	0.00383634	0.678356
DGAT2	0	0	5.24843e-10	6.48681e-258	0.929784	0.499159	0.0614445	0.00226988	0.00473151	0.00145134	0.000513784	0.681874
ARHGEF12	0	0	5.0389e-10	1.29915e-257	0.923351	0.488617	0.0610516	0.00227126	0.00480599	0.00166061	0.000588911	0.681874
DOPEY2	0	0	5.40254e-10	1.09878e-257	0.936245	0.49933	0.06018	0.00206727	0.00481795	0.000975758	0.000346136	0.681874
PODN	0	0	5.46503e-10	8.07609e-258	0.927933	0.497389	0.0589352	0.0022374	0.00483467	0.0012454	0.00044196	0.681874
SEMA3E	0	0	4.91746e-10	4.55634e-258	0.930282	0.498057	0.0624871	0.00196123	0.00485677	0.00272993	0.000969287	0.681874
HIST1H2BI	0	0	5.27562e-10	7.12014e-258	0.934225	0.499548	0.0607292	0.00204478	0.0048817	-0.0126259	0.00448557	0.681874
BEND7	0	0	5.5163e-10	6.40899e-258	0.930272	0.497104	0.0619687	0.00198517	0.00488733	0.00445862	0.00158421	0.681874
PGGT1B	0	0	5.9219e-10	7.45833e-258	0.942355	0.484684	0.0608139	0.00205362	0.0049599	-0.00584673	0.00208093	0.684861
C1QB	0	0	5.73345e-10	1.09246e-257	0.928859	0.494003	0.0609732	0.00207164	0.00499309	0.00325063	0.00115783	0.684861
SLCO1C1	0	0	5.18425e-10	7.93886e-258	0.926469	0.496222	0.0611082	0.00220792	0.00508439	-0.00157957	0.000563795	0.684861
C1orf105	0	0	5.38216e-10	6.92382e-258	0.922224	0.50244	0.0600615	0.00211168	0.00509682	0.0116675	0.00416562	0.684861
HLA-G	0	0	5.32116e-10	1.01107e-257	0.927272	0.490789	0.061777	0.00202042	0.00515217	0.00403883	0.00144378	0.684861
RAB8B	0	0	5.25895e-10	9.19282e-258	0.923527	0.497982	0.0594078	0.0023106	0.00516605	0.00459978	0.00164481	0.684861
SYNE1	0	0	5.3254e-10	8.61614e-258	0.928737	0.495682	0.0610611	0.00196106	0.00524922	0.00055447	0.000198637	0.684861
CBFB	0	0	5.26975e-10	9.1333e-258	0.92699	0.491637	0.0614687	0.00215482	0.00524929	-0.00716516	0.0025669	0.684861
SLC4A1	0	0	5.32757e-10	1.31077e-257	0.937554	0.497078	0.0612465	0.00192169	0.00536405	0.00216074	0.000776028	0.684861
BEGAIN	0	0	4.9811e-10	6.50933e-258	0.937617	0.499145	0.0623587	0.00201045	0.00538399	-0.00210489	0.000756298	0.684861
HIST1H2BE	0	0	5.03423e-10	6.78426e-258	0.928514	0.498952	0.0628833	0.00208848	0.00545565	0.00651879	0.00234585	0.684861
RCOR3	0	0	5.05741e-10	1.1662e-257	0.927561	0.498247	0.0616072	0.00213208	0.00545884	0.00419937	0.00151129	0.684861
PRPSAP2	0	0	5.13141e-10	1.01713e-257	0.925983	0.4977	0.0610282	0.00213763	0.00547066	0.00578456	0.0020823	0.684861
CKMT1A	0	0	4.96077e-10	7.01506e-258	0.927095	0.487958	0.0626187	0.00222318	0.00552403	0.00581961	0.0020973	0.684861
SLC34A2	0	0	4.99548e-10	7.98456e-258	0.93702	0.490472	0.0619177	0.00187544	0.0055873	-0.00239136	0.000862962	0.684861
ATP10B	0	0	5.50731e-10	5.06898e-258	0.927762	0.487203	0.0617916	0.00223608	0.00559401	0.00108724	0.000392405	0.684861
SCOC	0	0	5.44657e-10	8.97011e-258	0.926864	0.489436	0.0584953	0.00212097	0.00560263	-0.00866414	0.00312761	0.684861
ITIH5	0	0	5.33778e-10	6.02252e-258	0.930107	0.501715	0.0616405	0.00224421	0.00571636	0.00141276	0.000511191	0.684861
ITGA9	0	0	5.4141e-10	4.65144e-258	0.938529	0.499281	0.0628027	0.00186713	0.00571667	0.00139752	0.000505681	0.684861
GRM7	0	0	5.30286e-10	9.0692e-258	0.931722	0.491186	0.0610234	0.00215214	0.00572495	-0.00278148	0.00100662	0.684861
CPAMD8	0	0	5.21131e-10	5.73497e-258	0.942006	0.49315	0.0607834	0.00221799	0.00573863	0.00131794	0.000477101	0.684861
GFRA4	0	0	5.65597e-10	9.19745e-258	0.92189	0.494704	0.0605217	0.00209446	0.00574935	-0.00329664	0.00119366	0.684861
PDGFB	0	0	4.68523e-10	9.10704e-258	0.925442	0.494423	0.0606592	0.00204104	0.00576373	0.00204937	0.000742266	0.684861
IQCJ	0	0	5.43719e-10	9.08833e-258	0.934015	0.486508	0.0603491	0.00201706	0.00579452	0.0141382	0.00512398	0.684861
NGEF	0	0	5.19569e-10	6.03302e-258	0.93245	0.494968	0.0587476	0.00214294	0.0058792	0.00159974	0.000580776	0.690471
VPS13D	0	0	5.04285e-10	8.43216e-258	0.925497	0.490755	0.059743	0.00216276	0.00596123	-0.000843124	0.000306596	0.695702
RBL2	0	0	5.13127e-10	8.25523e-258	0.928559	0.507405	0.0600905	0.00204535	0.00609798	0.00201108	0.000733301	0.707214
AKAP12	0	0	5.47044e-10	8.22117e-258	0.929275	0.49664	0.0617928	0.00212345	0.00616339	0.00140356	0.000512435	0.708429
SHPRH	0	0	5.13705e-10	8.9785e-258	0.938307	0.492306	0.0611432	0.00208759	0.00618482	-0.00135827	0.000496105	0.708429
HOMER2	0	0	5.05272e-10	8.94506e-258	0.928121	0.489813	0.0601603	0.00188173	0.00631461	0.0016488	0.00060373	0.718859
ZNF394	0	0	5.13844e-10	1.02707e-257	0.929922	0.498008	0.0611301	0.00220951	0.00647513	0.005152	0.00189221	0.722021
SECISBP2	0	0	5.38909e-10	7.01471e-258	0.921197	0.503977	0.0610856	0.00210263	0.00648809	0.00251021	0.000922168	0.722021
C1orf116	0	0	5.00251e-10	9.008e-258	0.925539	0.499141	0.0607638	0.00209466	0.00650902	-0.002051	0.000753762	0.722021
TBCK	0	0	4.92506e-10	5.81383e-258	0.929748	0.494978	0.0620315	0.00212178	0.00652595	0.00165179	0.000607243	0.722021
ORC3	0	0	5.17137e-10	7.21644e-258	0.929613	0.487428	0.0606795	0.00210774	0.0065828	0.00191858	0.000706067	0.722021
LCE3C	0	0	4.95248e-10	7.9131e-258	0.926464	0.50139	0.0608253	0.00205444	0.00664499	0.031592	0.0116397	0.722021
TBC1D7	0	0	5.3371e-10	9.05159e-258	0.92797	0.493904	0.0600497	0.00216482	0.00673793	0.195131	0.0720157	0.722021
HMX1	0	0	5.24635e-10	8.25144e-258	0.926027	0.496371	0.0596361	0.00234667	0.00675072	0.00312587	0.00115391	0.722021
PCSK2	0	0	5.56362e-10	6.59058e-258	0.925289	0.495652	0.0611754	0.00203504	0.0068455	0.00490308	0.00181306	0.722021
COMMD5	0	0	5.37413e-10	8.7936e-258	0.928781	0.494738	0.0613301	0.00207011	0.00691348	-0.00411704	0.00152425	0.722021
ANKRD13B	0	0	5.26828e-10	9.07386e-258	0.934831	0.502358	0.0599258	0.00205204	0.00692787	-0.0027301	0.00101102	0.722021
GFRAL	0	0	4.97908e-10	5.1779e-258	0.930126	0.501667	0.0600759	0.00230316	0.00694734	0.00249459	0.000924127	0.722021
OSBPL11	0	0	5.34948e-10	6.5544e-258	0.917993	0.487615	0.0627267	0.00211123	0.00695103	-0.00317027	0.00117451	0.722021
C10orf142	0	0	5.33802e-10	8.0855e-258	0.922142	0.492641	0.0613389	0.00224129	0.00695143	-0.0587819	0.0217775	0.722021
ACOT7	0	0	5.39515e-10	1.07732e-257	0.932354	0.494493	0.0619055	0.0021755	0.00695339	0.00437736	0.00162178	0.722021
FGF13	0	0	4.9797e-10	6.0051e-258	0.930691	0.501853	0.0603611	0.00208107	0.00699712	0.0114174	0.00423334	0.722021
ATG16L1	0	0	5.55384e-10	9.82114e-258	0.925162	0.490644	0.0607195	0.00194111	0.00700387	-0.00282691	0.00104829	0.722021
NPR3	0	0	5.10999e-10	4.18399e-258	0.92766	0.493775	0.0606182	0.00209523	0.00708147	-0.00185531	0.000688933	0.722212
CRYGA	0	0	5.12119e-10	9.00891e-258	0.922931	0.485794	0.0609282	0.00204135	0.00709052	-0.00263422	0.000978319	0.722212
TFAP2A	0	0	5.26551e-10	3.75849e-258	0.934231	0.495096	0.0609354	0.00204843	0.00717366	0.00556891	0.00207122	0.722212
ALPP	0	0	5.59078e-10	9.28145e-258	0.92658	0.485873	0.0632676	0.0021364	0.00728665	-0.0014885	0.000554689	0.722212
ZFYVE16	0	0	5.02485e-10	6.1814e-258	0.932841	0.488531	0.0603042	0.00207734	0.00728944	-0.00171289	0.000638339	0.722212
TACC2	0	0	4.96976e-10	8.91304e-258	0.931021	0.492003	0.0619104	0.00225543	0.00731536	0.00145838	0.000543729	0.722212
BCO1	0	0	5.03461e-10	9.7977e-258	0.933882	0.486037	0.0599942	0.00219005	0.00734949	0.001662	0.000620007	0.722212
KAT6B	0	0	5.22154e-10	1.24885e-257	0.917471	0.493071	0.0603173	0.00201804	0.00738112	-0.00157763	0.000588847	0.722212
PPP1R14B	0	0	5.09466e-10	8.72619e-258	0.926202	0.497559	0.0627953	0.00190307	0.00740235	0.0059593	0.0022251	0.722212
ITGA5	0	0	5.23657e-10	6.41207e-258	0.928275	0.493908	0.0608905	0.00229469	0.00743358	-0.00242232	0.00090493	0.722212
ADGRF3	0	0	4.72073e-10	1.97859e-257	0.928026	0.488335	0.0604558	0.00241514	0.00748272	-0.000913482	0.00034154	0.722212
HIST1H3A	0	0	5.46151e-10	7.58803e-258	0.928708	0.492273	0.0612909	0.00195753	0.00751054	-0.00355204	0.00132868	0.722212
HMGN2	0	0	5.22293e-10	9.04353e-258	0.917822	0.486176	0.0622532	0.00214871	0.00755061	0.00872657	0.00326646	0.722212
NR1I3	0	0	5.48549e-10	6.9516e-258	0.930083	0.489288	0.0598873	0.00228196	0.00755375	0.00361082	0.00135164	0.722212
THAP10	0	0	5.39719e-10	8.21159e-258	0.926832	0.487008	0.0608936	0.00201954	0.00758953	0.00621195	0.00232671	0.722212
YRDC	0	0	5.75392e-10	7.04639e-258	0.92508	0.508987	0.060264	0.00174036	0.00777503	0.00222299	0.00083517	0.728806
SUGT1	0	0	5.25554e-10	5.0146e-258	0.926232	0.495137	0.0597056	0.00193267	0.00788718	0.00421777	0.00158748	0.728806
CDK16	0	0	5.33943e-10	5.59995e-258	0.928096	0.500456	0.061413	0.00218034	0.00788836	0.00753339	0.00283546	0.728806
FASLG	0	0	5.42696e-10	1.28653e-257	0.923533	0.496445	0.0614147	0.00214911	0.00788899	0.00706086	0.00265764	0.728806
CLHC1	0	0	5.3362e-10	1.02178e-257	0.929277	0.492305	0.0625972	0.00203931	0.00791398	-0.0029998	0.00112955	0.728806
TXNDC8	0	0	5.03305e-10	8.6618e-258	0.928283	0.499687	0.0610687	0.00207941	0.00793842	0.00664816	0.00250428	0.728806
MICAL2	0	0	5.18947e-10	7.90068e-258	0.926212	0.49387	0.0609289	0.00212834	0.00799817	-0.000894908	0.000337423	0.728806
STRA8	0	0	5.1861e-10	1.03319e-257	0.931564	0.49884	0.0612349	0.00203007	0.00807865	-0.00637842	0.00240804	0.728806
SPAG16	0	0	4.84902e-10	8.2277e-258	0.932267	0.492215	0.0594704	0.00216116	0.00808112	-0.00289241	0.00109201	0.728806
TRMT13	0	0	5.01647e-10	9.98982e-258	0.921913	0.491598	0.060379	0.0020316	0.00809212	-0.00322711	0.00121859	0.728806
ARHGAP12	0	0	5.17766e-10	7.92542e-258	0.927608	0.500167	0.0600896	0.00201368	0.00812197	0.00297438	0.00112368	0.728806
PLCL1	0	0	5.22947e-10	9.55663e-258	0.926614	0.49395	0.0611344	0.00202307	0.00813014	-0.00219445	0.000829141	0.728806
CDC42BPB	0	0	4.82802e-10	6.44265e-258	0.922802	0.48371	0.0611302	0.00191573	0.0081873	-0.00162522	0.000614616	0.729867
EPHA4	0	0	5.3047e-10	7.73317e-258	0.933564	0.4901	0.0590915	0.00207179	0.00822352	0.00279466	0.00105746	0.729867
USP46	0	0	5.31014e-10	6.79803e-258	0.924885	0.490416	0.0612898	0.00206652	0.00829265	0.00640124	0.00242476	0.729867
CAB39	0	0	5.38485e-10	7.82634e-258	0.918973	0.4978	0.0603162	0.00209271	0.00832299	0.00779514	0.00295414	0.729867
IMPDH1	0	0	5.00527e-10	8.64343e-258	0.932683	0.490138	0.0635253	0.00189555	0.00833864	0.00187234	0.000709738	0.729867
GNB1L	0	0	5.16889e-10	4.95036e-258	0.929166	0.498736	0.0608984	0.00204508	0.00841109	0.00272428	0.00103383	0.732752
GFI1B	0	0	5.21996e-10	7.42924e-258	0.920729	0.496603	0.0597448	0.00204575	0.00861282	-0.00315961	0.0012027	0.733765
WFDC5	0	0	5.52826e-10	4.87668e-258	0.923605	0.4939	0.0604398	0.00228014	0.0086157	0.00410771	0.00156367	0.733765
IFNA10	0	0	5.39301e-10	5.24103e-258	0.942222	0.487548	0.0602653	0.00221903	0.0086632	0.00325319	0.00123926	0.733765
RER1	0	0	5.08244e-10	6.50225e-258	0.931223	0.492929	0.0616211	0.00204444	0.00867421	-0.0100922	0.00384515	0.733765
STRAP	0	0	5.28081e-10	7.25751e-258	0.933496	0.494265	0.0607385	0.00221445	0.00868336	-0.00386114	0.0014713	0.733765
FN1	0	0	5.16606e-10	1.0368e-257	0.918317	0.494734	0.0623324	0.00209616	0.00873613	0.000787972	0.000300495	0.733765
TBX22	0	0	5.34837e-10	9.93993e-258	0.935235	0.493456	0.0617576	0.00205323	0.0087363	-0.00568677	0.00216867	0.733765
CYP4F3	0	0	5.25088e-10	9.0106e-258	0.929293	0.491643	0.0629901	0.00179804	0.00877559	0.00141692	0.000540661	0.733765
SFTPC	0	0	5.05477e-10	7.91969e-258	0.9366	0.49455	0.0616931	0.00203788	0.008826	0.00448905	0.00171419	0.733765
AKT1	0	0	4.88424e-10	5.01296e-258	0.928897	0.491324	0.0611729	0.00206996	0.00884346	-0.00483684	0.00184747	0.733765
DPH2	0	0	5.33785e-10	8.5605e-258	0.93532	0.487306	0.0614163	0.00201736	0.00891127	-0.00314231	0.00120143	0.733765
MANBA	0	0	5.58993e-10	9.71069e-258	0.915798	0.499688	0.0604428	0.00195996	0.00892571	0.00207828	0.000794778	0.733765
AMPD2	0	0	4.84186e-10	9.83498e-258	0.92691	0.490828	0.0612518	0.00195969	0.00895441	-0.00264787	0.00101302	0.733765
CAGE1	0	0	5.11262e-10	8.21814e-258	0.923178	0.496503	0.060802	0.00211206	0.00897632	-0.00234356	0.000896887	0.733765
RASL10B	0	0	4.95206e-10	1.17817e-257	0.931656	0.492815	0.0605934	0.00200499	0.00905627	-0.00451713	0.00173073	0.736553
ID2	0	0	5.01339e-10	8.49841e-258	0.92592	0.492833	0.0606126	0.0020396	0.00910161	0.00669382	0.0025664	0.736553
ABHD14A	0	0	5.07557e-10	6.35191e-258	0.92662	0.502514	0.0600025	0.00211997	0.00913673	-0.0022665	0.000869413	0.736553
OPALIN	0	0	5.13426e-10	1.30492e-257	0.930353	0.499058	0.0589956	0.0018807	0.00918428	0.00150866	0.000579105	0.736553
OR9Q2	0	0	5.16908e-10	6.92439e-258	0.930031	0.489943	0.0615765	0.00230177	0.0092089	-0.00259711	0.000997264	0.736553
C16orf54	0	0	4.96171e-10	7.97246e-258	0.921198	0.499653	0.0596942	0.00194935	0.00932873	-0.00376216	0.0014471	0.742935
TMEM150C	0	0	5.13252e-10	7.0211e-258	0.923589	0.486825	0.0594255	0.00207478	0.00957239	-0.0030641	0.00118262	0.756489
SLC25A22	0	0	5.06978e-10	1.11127e-257	0.934973	0.494167	0.0588748	0.00199103	0.00958045	-0.00405867	0.00156666	0.756489
WNT7B	0	0	5.4951e-10	8.24292e-258	0.916815	0.496579	0.0619895	0.00204825	0.0096977	0.00446559	0.00172653	0.761006
CHRNB4	0	0	5.08801e-10	8.3415e-258	0.926493	0.487907	0.0612631	0.00225945	0.00971969	0.00131194	0.000507389	0.761006
C6orf62	0	0	5.19646e-10	7.02443e-258	0.932519	0.492478	0.0619556	0.00205424	0.00997171	0.00683468	0.00265235	0.764364
PRCP	0	0	4.76223e-10	1.33829e-257	0.926763	0.497098	0.0594073	0.00214376	0.00998372	-0.00320444	0.00124375	0.764364
FANCD2	0	0	4.92447e-10	8.37355e-258	0.93586	0.493021	0.0617816	0.00220777	0.00999797	0.00206947	0.000803388	0.764364
RCOR1	0	0	5.34248e-10	6.74407e-258	0.925027	0.496075	0.0614347	0.00220712	0.0099999	0.00552351	0.00214433	0.764364
MTAP	0	0	5.00256e-10	8.79251e-258	0.924516	0.492106	0.0616352	0.00220837	0.0100124	0.00431385	0.001675	0.764364
TOPBP1	0	0	4.95465e-10	8.21269e-258	0.934185	0.493973	0.0631212	0.00213353	0.0100342	0.00235177	0.000913421	0.764364
IMPAD1	0	0	5.28212e-10	1.23644e-257	0.918802	0.502436	0.0606647	0.0022787	0.010073	-0.0030595	0.00118892	0.764364
ARNTL2	0	0	5.06428e-10	8.89061e-258	0.931037	0.492678	0.061994	0.0021099	0.0100921	0.0019758	0.000767991	0.764364
STC2	0	0	5.14213e-10	7.09462e-258	0.919835	0.495601	0.0614732	0.00204315	0.0101423	0.00206066	0.000801509	0.765041
RBBP9	0	0	5.32852e-10	6.69476e-258	0.928282	0.492969	0.0618067	0.00194978	0.0101975	-0.00321328	0.00125075	0.766093
AGER	0	0	5.12059e-10	4.92732e-258	0.925567	0.49153	0.0597369	0.00206749	0.0103283	-0.0016805	0.000655251	0.767868
XKRX	0	0	5.19942e-10	9.63593e-258	0.92614	0.495624	0.0624272	0.0019773	0.0103729	-0.00306829	0.00119706	0.767868
ATOH7	0	0	5.09956e-10	8.28864e-258	0.925529	0.49316	0.0611184	0.00211005	0.0104002	0.00459502	0.00179334	0.767868
HDGFL3	0	0	5.14096e-10	6.34173e-258	0.918606	0.499533	0.0642985	0.00197773	0.0104295	0.00966628	0.00377399	0.767868
TNFRSF25	0	0	5.2229e-10	4.09033e-258	0.926555	0.498235	0.0615966	0.00207323	0.0104419	0.0044831	0.00175061	0.767868
ORAI3	0	0	5.35387e-10	6.04393e-258	0.924738	0.499678	0.0614462	0.00203453	0.0104694	0.00248972	0.000972563	0.767868
IRF2BPL	0	0	5.6831e-10	9.32829e-258	0.920834	0.491325	0.0610609	0.00209107	0.01058	-0.00273993	0.00107183	0.77276
RHBG	0	0	4.95618e-10	5.12767e-258	0.934874	0.496688	0.0589777	0.0019258	0.010631	-0.00146703	0.000574262	0.77276
MRGPRE	0	0	5.48599e-10	6.79942e-258	0.927366	0.493297	0.061022	0.00222861	0.0106611	0.00273842	0.00107235	0.77276
TRIM13	0	0	5.13421e-10	6.96495e-258	0.926125	0.49518	0.0618029	0.00206753	0.0107252	0.0047887	0.00187677	0.774386
CLASRP	0	0	5.32393e-10	5.36644e-258	0.927461	0.496171	0.0621498	0.00217672	0.0107941	0.00203712	0.00079908	0.776341
PSAPL1	0	0	5.40656e-10	6.13715e-258	0.924416	0.49253	0.0607807	0.00221514	0.0109937	0.00317809	0.00124977	0.784355
SRSF2	0	0	4.80533e-10	5.72004e-258	0.916887	0.490825	0.0620378	0.0021289	0.0110863	0.00802153	0.00315808	0.784355
PRDX1	0	0	5.35118e-10	1.19668e-257	0.922071	0.49773	0.0609853	0.0021132	0.0111341	0.00528176	0.00208066	0.784355
ARPC5L	0	0	5.41878e-10	6.15778e-258	0.932035	0.50028	0.0613619	0.00210676	0.0111983	0.00798175	0.00314678	0.784355
RHOC	0	0	5.53543e-10	8.07577e-258	0.927286	0.497346	0.0602598	0.00200686	0.0112087	0.00381437	0.001504	0.784355
ZNHIT1	0	0	5.04157e-10	6.9234e-258	0.934761	0.486654	0.0609774	0.0021031	0.011268	0.00408187	0.00161064	0.784355
GOLGA8M	0	0	5.30745e-10	1.17862e-257	0.919567	0.495132	0.0610378	0.0021373	0.0113234	-0.00196715	0.000776735	0.784355
LARP1B	0	0	5.2601e-10	7.52417e-258	0.934634	0.489098	0.0614051	0.00190407	0.0113535	0.00188984	0.000746483	0.784355
RANGRF	0	0	5.74649e-10	7.92918e-258	0.928263	0.488935	0.0622101	0.00202619	0.011354	-0.00128705	0.000508384	0.784355
TRIM65	0	0	4.97225e-10	9.95129e-258	0.928867	0.493332	0.060784	0.00212331	0.0113638	-0.00153779	0.0006075	0.784355
MUC5AC	0	0	5.46369e-10	7.36218e-258	0.931942	0.491029	0.061469	0.00207605	0.011392	0.00298021	0.00117773	0.784355
SNX1	0	0	4.98362e-10	1.07804e-257	0.934057	0.490194	0.0603794	0.0019604	0.0114128	0.00182499	0.000721386	0.784355
SERPINA10	0	0	5.17951e-10	9.35955e-258	0.931486	0.49328	0.061332	0.00206086	0.0115067	0.000839787	0.000332332	0.787888
OSM	0	0	5.02416e-10	8.72194e-258	0.926195	0.494424	0.0598219	0.00216552	0.0116049	0.00553315	0.00219224	0.78822
TARBP1	0	0	5.1211e-10	7.41748e-258	0.924395	0.496114	0.0600996	0.00199642	0.0117171	-0.0014549	0.000577207	0.78822
CCNG1	0	0	5.07046e-10	5.66817e-258	0.927301	0.498852	0.0629465	0.00203942	0.0117478	0.00436552	0.00173258	0.78822
GPRASP1	0	0	5.40029e-10	1.03123e-257	0.923585	0.495571	0.0605925	0.00216636	0.0117727	0.00451692	0.0017932	0.78822
SOX6	0	0	5.24972e-10	7.73164e-258	0.925088	0.49275	0.0610585	0.00189094	0.0117778	0.0026554	0.00105425	0.78822
IGF1	0	0	5.27307e-10	7.22461e-258	0.927654	0.503746	0.0599248	0.00215839	0.0118242	-0.0032404	0.00128721	0.78822
C5orf46	0	0	5.55469e-10	5.45139e-258	0.930364	0.490374	0.0580781	0.00205226	0.0118254	0.0120208	0.00477518	0.78822
TCTEX1D1	0	0	5.26213e-10	5.51945e-258	0.929884	0.49287	0.0599854	0.00206689	0.0119225	-0.00700862	0.00278732	0.78822
EIF2B5	0	0	5.3893e-10	1.00308e-257	0.927719	0.500952	0.0620452	0.00200267	0.0119369	-0.00272073	0.00108222	0.78822
ERVMER34-1	0	0	5.2421e-10	6.57086e-258	0.925322	0.492107	0.0607405	0.00214485	0.0119704	-0.0112452	0.00447472	0.78822
ZZEF1	0	0	5.22794e-10	1.11327e-257	0.932311	0.48601	0.0591683	0.00219369	0.0119988	0.000917917	0.000365382	0.78822
LSM3	0	0	5.74255e-10	5.29771e-258	0.927913	0.499281	0.0604873	0.00209792	0.012062	0.00562949	0.00224251	0.78822
DGKQ	0	0	4.77223e-10	1.0417e-257	0.923728	0.496415	0.0616198	0.00202578	0.0120637	0.00182752	0.000728005	0.78822
BAG3	0	0	5.50042e-10	6.30472e-258	0.930492	0.49607	0.0593007	0.00210375	0.0121823	0.00266167	0.00106176	0.793176
ZCCHC24	0	0	5.22813e-10	7.34955e-258	0.921928	0.491957	0.0611301	0.00202317	0.0123769	-0.00372228	0.00148817	0.798123
CDKN2C	0	0	5.10481e-10	8.60532e-258	0.929044	0.497778	0.061417	0.00207867	0.0123801	0.0111878	0.00447307	0.798123
LDB1	0	0	5.63488e-10	7.68534e-258	0.922904	0.493031	0.0605414	0.002146	0.0124423	0.00683873	0.00273617	0.798123
CYP20A1	0	0	6.00513e-10	1.06145e-257	0.926432	0.494308	0.0606113	0.0021535	0.0124451	0.00219488	0.000878198	0.798123
AAMP	0	0	5.3635e-10	1.06469e-257	0.93149	0.493714	0.0613501	0.00194979	0.0124734	-0.00331476	0.0013267	0.798123
TRIM61	0	0	5.25379e-10	8.74351e-258	0.918188	0.48985	0.0607496	0.00179108	0.012651	0.00382999	0.001536	0.806705
ZNF320	0	0	5.4169e-10	8.5193e-258	0.926765	0.49195	0.0596515	0.00201979	0.0128203	0.00516586	0.00207568	0.80901
RBP1	0	0	5.14039e-10	1.19069e-257	0.925582	0.501991	0.0615686	0.00201852	0.0128576	0.00280072	0.00112582	0.80901
ELAVL1	0	0	5.3757e-10	9.66441e-258	0.925903	0.496698	0.0598318	0.00210472	0.0128608	-0.00741464	0.0029806	0.80901
DHRS4L2	0	0	5.01748e-10	9.26936e-258	0.931658	0.493529	0.0601789	0.00213842	0.0128615	0.0033264	0.00133719	0.80901
RAD23B	0	0	4.8652e-10	6.21193e-258	0.936083	0.497212	0.0600998	0.00195556	0.0130745	-0.00734968	0.00296147	0.815787
PPP1R18	0	0	4.97456e-10	9.30995e-258	0.927348	0.488517	0.0609213	0.00229333	0.0130898	0.00139039	0.000560337	0.815787
FBXO11	0	0	5.4163e-10	1.11693e-257	0.935071	0.497769	0.0580783	0.0019824	0.0131554	-0.00457348	0.00184447	0.815787
PPL	0	0	5.01185e-10	1.04192e-257	0.927472	0.491892	0.0620256	0.00196125	0.0131709	-0.000997866	0.000402504	0.815787
GIMAP8	0	0	5.49497e-10	6.30896e-258	0.923117	0.498322	0.0596224	0.00219316	0.0132194	0.00216957	0.000875592	0.815787
ACER3	0	0	5.34035e-10	6.54239e-258	0.921594	0.499766	0.0613758	0.00210517	0.013233	0.00690345	0.00278649	0.815787
CLEC4F	0	0	5.21671e-10	8.39485e-258	0.928206	0.500707	0.0607974	0.0022551	0.0133547	0.0033809	0.00136646	0.818251
CCDC144NL	0	0	4.91535e-10	6.95145e-258	0.92485	0.495641	0.0609101	0.00204248	0.0134469	0.00283988	0.00114894	0.818251
TIRAP	0	0	5.26387e-10	6.49359e-258	0.932372	0.496444	0.0619229	0.00214172	0.0135465	0.00239304	0.000969196	0.818251
IL10RA	0	0	5.46771e-10	8.96113e-258	0.930374	0.48915	0.0628456	0.00210518	0.0135608	0.00302623	0.00122583	0.818251
WT1	0	0	5.33994e-10	8.72552e-258	0.925486	0.501236	0.0603123	0.00203182	0.0135901	0.00301523	0.00122175	0.818251
SWT1	0	0	5.02916e-10	9.62863e-258	0.93061	0.493854	0.0611982	0.00196543	0.013599	0.00312479	0.00126627	0.818251
ARL14EPL	0	0	5.28193e-10	8.5599e-258	0.933042	0.4898	0.0608295	0.00207365	0.0136424	-0.00143691	0.000582554	0.818251
ATP2B2	0	0	5.03699e-10	6.38838e-258	0.926368	0.503906	0.0611335	0.00201115	0.0136479	0.00130285	0.000528234	0.818251
FBXW9	0	0	5.31879e-10	9.77374e-258	0.925779	0.498737	0.0600519	0.0018529	0.013681	-0.00246528	0.000999886	0.818251
TRIM36	0	0	5.01969e-10	7.18398e-258	0.948504	0.496827	0.0615382	0.00201439	0.0137427	0.00261469	0.00106118	0.818251
LUC7L	0	0	5.64889e-10	8.47993e-258	0.924827	0.491816	0.0621528	0.00214287	0.013758	0.00238796	0.000969315	0.818251
AURKC	0	0	5.03017e-10	9.13862e-258	0.922025	0.498439	0.0601724	0.00210159	0.0139016	0.00194595	0.000791094	0.819369
S1PR1	0	0	5.63603e-10	8.74896e-258	0.926885	0.49345	0.0604816	0.00196851	0.0139312	-0.00472477	0.00192137	0.819369
MAD2L2	0	0	5.4397e-10	6.67281e-258	0.921771	0.496413	0.0627988	0.00192927	0.0140337	0.00602187	0.00245147	0.819369
LRRC41	0	0	5.25149e-10	6.73636e-258	0.930888	0.496646	0.0621246	0.00205519	0.0140609	-0.00197363	0.000803683	0.819369
DEGS2	0	0	5.20343e-10	1.06519e-257	0.921958	0.499955	0.062401	0.00220219	0.0141469	0.00391612	0.00159611	0.819369
SLC26A6	0	0	5.10981e-10	8.31123e-258	0.923903	0.496428	0.0606486	0.0021353	0.014177	-0.00166416	0.00067848	0.819369
TPRG1	0	0	5.0594e-10	8.14776e-258	0.922432	0.499241	0.06081	0.00208942	0.0141927	0.00425541	0.00173522	0.819369
ZNF700	0	0	5.1973e-10	5.65563e-258	0.922047	0.494105	0.0616613	0.00217723	0.014206	0.00319839	0.00130438	0.819369
C7orf61	0	0	5.32749e-10	7.16345e-258	0.923876	0.492741	0.0608653	0.00212533	0.0142147	-0.00570995	0.00232886	0.819369
RPP21	0	0	5.16297e-10	1.12123e-257	0.931212	0.500804	0.0616384	0.002199	0.014261	0.00903429	0.00368649	0.819369
SPINK7	0	0	5.07525e-10	9.90622e-258	0.925728	0.498844	0.0603823	0.00208624	0.0142652	0.00819669	0.00334484	0.819369
ART3	0	0	5.43582e-10	9.23928e-258	0.932792	0.49548	0.0610362	0.00194331	0.0143634	0.00310781	0.00126949	0.819369
ABRA	0	0	5.84785e-10	1.20395e-257	0.928351	0.496662	0.0613364	0.00213724	0.0144097	0.0033099	0.00135268	0.819369
RRBP1	0	0	5.26843e-10	6.41795e-258	0.922452	0.497384	0.0606986	0.00197328	0.0144193	0.00106402	0.000434883	0.819369
SEC31A	0	0	5.47353e-10	8.51926e-258	0.934206	0.494689	0.0614229	0.00198834	0.0145105	-0.00233413	0.000954891	0.819369
ANKRD54	0	0	5.41484e-10	1.10046e-257	0.921294	0.501564	0.0613193	0.00216476	0.0145508	-0.0033666	0.00137783	0.819369
SENP3	0	0	5.07163e-10	9.2274e-258	0.927061	0.491362	0.0592111	0.0021094	0.0146004	0.00446347	0.00182766	0.819369
EIF4H	0	0	4.90735e-10	1.18499e-257	0.921385	0.48901	0.0620914	0.00212139	0.0146344	-0.00788914	0.00323149	0.819369
BLOC1S1	0	0	5.2547e-10	7.11402e-258	0.929861	0.499523	0.0605249	0.00213219	0.0146516	-0.00204513	0.000837857	0.819369
ENO4	0	0	5.3497e-10	7.33234e-258	0.928435	0.49395	0.0600824	0.0021285	0.0147402	0.00298801	0.00122523	0.819369
KRT31	0	0	5.24111e-10	9.07491e-258	0.929236	0.487138	0.0616348	0.00203461	0.0147445	-0.00242305	0.000993613	0.819369
KRTCAP2	0	0	5.11196e-10	6.13776e-258	0.931753	0.491708	0.0593722	0.00215668	0.0147483	0.00408727	0.00167612	0.819369
PELI2	0	0	5.29739e-10	8.6042e-258	0.931532	0.486454	0.0617134	0.00209517	0.0148503	0.00284895	0.0011695	0.821458
FOXN1	0	0	5.31027e-10	6.12964e-258	0.931163	0.490805	0.061235	0.00206903	0.0149488	-0.0022204	0.000912376	0.821458
NMI	0	0	5.1383e-10	6.57062e-258	0.925582	0.498083	0.0601576	0.00209441	0.0149847	0.00215673	0.00088653	0.821458
IL17RA	0	0	5.22805e-10	6.99696e-258	0.919412	0.48819	0.0613183	0.00262126	0.0150415	-0.00152447	0.000626991	0.821458
EEF1A1	0	0	5.1633e-10	6.76587e-258	0.938569	0.495598	0.0612945	0.00206776	0.0150789	0.00931778	0.00383368	0.821458
KIAA0355	0	0	5.12784e-10	9.19666e-258	0.923832	0.505759	0.0606601	0.00219761	0.0151242	-0.0018171	0.000747957	0.821458
LRRC69	0	0	5.2372e-10	5.8359e-258	0.93042	0.497245	0.0610869	0.00213597	0.0151697	0.00311974	0.00128473	0.821458
PDE10A	0	0	5.48474e-10	5.17397e-258	0.92509	0.502166	0.0612458	0.00192809	0.0152325	-0.00202882	0.000835993	0.821458
MTSS1	0	0	5.50439e-10	8.67764e-258	0.926103	0.498162	0.0604291	0.00199034	0.0153831	-0.00256242	0.00105742	0.821458
KRTAP13-1	0	0	5.65062e-10	9.64783e-258	0.924377	0.495772	0.0622879	0.00208061	0.0153943	0.00341383	0.00140893	0.821458
DDO	0	0	5.66185e-10	6.01638e-258	0.928514	0.499244	0.060532	0.00189265	0.015433	0.00174404	0.000720057	0.821458
UGT2B11	0	0	5.03708e-10	8.59807e-258	0.918743	0.493038	0.0623016	0.00206837	0.0154413	-0.00157665	0.000651001	0.821458
GJA9	0	0	4.93956e-10	7.94399e-258	0.924338	0.493786	0.0622554	0.00215648	0.0154566	0.0017896	0.000739038	0.821458
KRTAP21-3	0	0	5.68124e-10	5.77878e-258	0.918735	0.495454	0.0608276	0.00200813	0.0155595	-0.0150054	0.00620285	0.821458
FRMD6	0	0	5.27411e-10	1.09508e-257	0.921575	0.497361	0.0611879	0.00198007	0.0155808	0.0025746	0.00106449	0.821458
DOK2	0	0	5.3952e-10	1.0448e-257	0.919844	0.494	0.0605268	0.00224753	0.0155901	0.00128963	0.000533256	0.821458
ST8SIA5	0	0	5.5786e-10	7.13283e-258	0.939669	0.490764	0.062933	0.00199589	0.0156283	-0.00228683	0.000945943	0.821458
HPX	0	0	5.2962e-10	9.84649e-258	0.925543	0.496243	0.06146	0.00204573	0.0156484	0.00261802	0.00108315	0.821458
TM9SF3	0	0	5.20615e-10	9.80525e-258	0.92462	0.487569	0.0614168	0.00206064	0.0156833	0.00357499	0.00147957	0.821458
PUM3	0	0	5.15674e-10	1.14245e-257	0.925258	0.497868	0.0612856	0.00215233	0.0157126	0.00112209	0.000464527	0.821458
STK39	0	0	4.97255e-10	7.45339e-258	0.939466	0.500474	0.0619491	0.00199912	0.0157155	-0.00415355	0.00171955	0.821458
PLPPR4	0	0	5.48028e-10	1.12937e-257	0.920159	0.49089	0.0620468	0.00205204	0.0157605	-0.00188242	0.000779648	0.821495
ITPA	0	0	5.43478e-10	9.73108e-258	0.930023	0.494153	0.0599488	0.00212553	0.0158895	0.0034604	0.00143498	0.822604
ZYX	0	0	5.37019e-10	1.10749e-257	0.931492	0.489502	0.0627993	0.00214804	0.0159028	0.0025025	0.00103788	0.822604
CYP26A1	0	0	4.94951e-10	6.61604e-258	0.924673	0.495869	0.0594506	0.00201259	0.0159169	-0.00254403	0.00105524	0.822604
ALOX5	0	0	5.29069e-10	3.80532e-258	0.933089	0.49366	0.0614391	0.00217986	0.0160493	0.00235962	0.000979983	0.822604
C16orf70	0	0	5.72125e-10	5.04553e-258	0.928957	0.495201	0.0614047	0.00216077	0.0160976	0.00261765	0.00108764	0.822604
THADA	0	0	5.14408e-10	6.14495e-258	0.933261	0.49151	0.0605147	0.00232253	0.0161694	0.000857594	0.000356573	0.822604
UGT2B4	0	0	5.07871e-10	9.13208e-258	0.926797	0.498358	0.0605631	0.00215097	0.0162074	0.00267887	0.00111423	0.822604
KNSTRN	0	0	5.36776e-10	9.15379e-258	0.931437	0.496784	0.0605214	0.00193816	0.0162399	0.0041065	0.00170854	0.822604
ATG14	0	0	5.38866e-10	8.02181e-258	0.929648	0.499487	0.0601984	0.00204187	0.0162656	0.00329675	0.00137197	0.822604
RWDD4	0	0	5.21388e-10	1.03647e-257	0.92449	0.486852	0.0601006	0.00197736	0.0162754	0.00278104	0.00115746	0.822604
OBP2A	0	0	5.14917e-10	1.09821e-257	0.934457	0.494263	0.0608655	0.00209113	0.0163271	0.00281587	0.00117252	0.822604
SLC12A1	0	0	5.09684e-10	7.72546e-258	0.924479	0.496478	0.0623489	0.00195898	0.0163919	0.0010964	0.000456815	0.822604
ARL1	0	0	5.45771e-10	8.50792e-258	0.929053	0.49102	0.0601604	0.00201625	0.0164138	0.0102227	0.00426015	0.822604
ANKLE2	0	0	5.27936e-10	8.8504e-258	0.929147	0.494757	0.0595512	0.00212465	0.0164747	0.00223391	0.000931475	0.822604
VEGFB	0	0	5.25423e-10	9.78903e-258	0.915246	0.496739	0.0613005	0.00194678	0.0165178	-0.00267095	0.00111415	0.822604
HOXC4	0	0	5.173e-10	7.19826e-258	0.929384	0.491582	0.0609571	0.00201896	0.016526	-0.00254055	0.00105984	0.822604
FASTKD2	0	0	5.32964e-10	1.10147e-257	0.929638	0.499394	0.0594129	0.00213399	0.0166888	0.00324118	0.00135415	0.822604
PRDM5	0	0	5.27047e-10	7.39826e-258	0.940276	0.49176	0.0611838	0.00201167	0.0168387	0.00219498	0.000918311	0.822604
UBTF	0	0	4.99092e-10	7.9468e-258	0.935066	0.491231	0.0600183	0.00212393	0.016855	0.00591344	0.00247436	0.822604
TTLL3	0	0	5.51787e-10	6.86208e-258	0.926913	0.495947	0.0618411	0.00197998	0.0168757	-0.00256753	0.00107454	0.822604
ZMAT1	0	0	5.18263e-10	9.33393e-258	0.927852	0.491006	0.060433	0.0021345	0.0168859	0.00728448	0.00304891	0.822604
SIGLEC14	0	0	5.21985e-10	9.36081e-258	0.926549	0.498179	0.0626994	0.00206942	0.0169037	0.00469952	0.0019673	0.822604
BORCS6	0	0	4.78969e-10	9.268e-258	0.929311	0.4978	0.0601198	0.00200756	0.016916	-0.00278297	0.00116513	0.822604
USP37	0	0	5.41056e-10	5.82776e-258	0.923262	0.494612	0.0599551	0.00217851	0.01699	-0.0021289	0.000891893	0.822604
DLG1	0	0	5.09552e-10	1.01232e-257	0.928206	0.490362	0.061608	0.00216343	0.0170209	-0.00158799	0.000665466	0.822604
GPAM	0	0	5.23128e-10	7.63253e-258	0.925848	0.494756	0.0605834	0.00218931	0.017055	-0.00277342	0.00116259	0.822604
CREB1	0	0	5.05584e-10	8.8828e-258	0.923873	0.498937	0.0598273	0.00217939	0.0171275	0.0107082	0.00449171	0.822604
ANK1	0	0	4.93376e-10	1.03449e-257	0.93583	0.496368	0.0628427	0.00199332	0.0171902	0.000945545	0.000396847	0.822604
BTBD17	0	0	5.36278e-10	6.97442e-258	0.925146	0.495603	0.0616832	0.00219175	0.0172489	0.00332084	0.0013945	0.822604
PSKH1	0	0	5.30197e-10	8.83071e-258	0.930382	0.483158	0.0605936	0.00189669	0.0172525	-0.00306178	0.00128575	0.822604
TMEM233	0	0	5.07456e-10	7.27991e-258	0.935025	0.498134	0.0613571	0.00201135	0.0173183	0.00606026	0.00254643	0.822604
SMYD1	0	0	5.66627e-10	6.68952e-258	0.937146	0.49608	0.0606421	0.00220817	0.0174351	0.00104875	0.000441126	0.822604
DNAJC17	0	0	5.19901e-10	9.24148e-258	0.925657	0.495349	0.0608498	0.00215538	0.0174637	0.00163762	0.000688996	0.822604
CSRNP1	0	0	5.29477e-10	5.48279e-258	0.924435	0.493476	0.0605724	0.00206758	0.0175305	-0.00334075	0.00140639	0.822604
EPCAM	0	0	4.95661e-10	6.08018e-258	0.931418	0.49056	0.05875	0.00204263	0.0175458	-0.00225777	0.000950605	0.822604
RRP7A	0	0	5.00066e-10	7.31817e-258	0.939896	0.492052	0.0625221	0.00219136	0.0175778	0.00193815	0.000816262	0.822604
GRAMD4	0	0	5.16035e-10	7.27768e-258	0.936985	0.500835	0.0612292	0.00208178	0.0176031	-0.00338256	0.0014249	0.822604
OR2V1	0	0	5.42452e-10	6.56555e-258	0.929567	0.494051	0.0618898	0.00213144	0.0176068	0.00714267	0.00300894	0.822604
CD2AP	0	0	5.49438e-10	5.05837e-258	0.927665	0.485594	0.0612126	0.00198261	0.017648	-0.00282601	0.00119093	0.822604
ZBTB14	0	0	5.6e-10	1.07911e-257	0.926586	0.492995	0.062449	0.00213401	0.0176514	0.0076599	0.00322811	0.822604
SLC45A2	0	0	5.40255e-10	9.74149e-258	0.930187	0.492329	0.0628609	0.00221859	0.0178114	0.0018099	0.000763817	0.822604
TBC1D21	0	0	5.28194e-10	9.08158e-258	0.930398	0.48757	0.0630733	0.00218323	0.0178467	0.00295136	0.00124593	0.822604
TTC28	0	0	5.756e-10	7.88269e-258	0.924744	0.501946	0.0629223	0.00195599	0.0178866	-0.000793614	0.000335143	0.822604
ZNF398	0	0	5.55232e-10	7.17192e-258	0.927858	0.490601	0.0596045	0.00205198	0.0178928	-0.00244558	0.00103282	0.822604
GPATCH2L	0	0	5.17212e-10	7.34014e-258	0.933675	0.487662	0.0607788	0.00205691	0.0179092	0.00315146	0.00133113	0.822604
ZKSCAN3	0	0	5.06712e-10	8.13618e-258	0.936106	0.492759	0.0596314	0.00207158	0.0179193	-0.00251481	0.00106231	0.822604
CYB561A3	0	0	5.19519e-10	6.23086e-258	0.93229	0.48671	0.0602501	0.00202378	0.0179768	0.00477129	0.0020165	0.822604
TEX30	0	0	5.49268e-10	1.08873e-257	0.91668	0.491998	0.0611948	0.0022253	0.0180158	0.00418147	0.00176782	0.822604
TEX45	0	0	5.3046e-10	1.00188e-257	0.94105	0.494461	0.0605268	0.00208533	0.0181368	0.00343133	0.00145221	0.822604
IMP4	0	0	5.36329e-10	1.19568e-257	0.929659	0.501521	0.0616921	0.0020547	0.0182009	-0.00192313	0.000814355	0.822604
PPP1CC	0	0	5.06402e-10	9.79121e-258	0.9262	0.489894	0.0602072	0.0021157	0.0182403	0.00752155	0.00318611	0.822604
OR11H6	0	0	5.19081e-10	5.69683e-258	0.925519	0.492717	0.0608506	0.00204897	0.0182815	0.00214165	0.000907519	0.822604
GSDMA	0	0	5.63043e-10	6.56798e-258	0.923266	0.491233	0.0592749	0.00195327	0.018291	-0.00260866	0.00110551	0.822604
TTC1	0	0	5.27646e-10	6.56468e-258	0.92718	0.504	0.0599056	0.00211674	0.0182944	0.00329063	0.00139455	0.822604
ARHGEF37	0	0	4.96374e-10	9.55698e-258	0.937087	0.481032	0.0609676	0.00227565	0.0183387	0.00202126	0.000856927	0.822604
PIK3R4	0	0	5.30213e-10	8.26061e-258	0.918021	0.499121	0.0618275	0.00212869	0.0183432	0.00152203	0.000645299	0.822604
RASGRP4	0	0	5.26596e-10	1.15865e-257	0.937909	0.496062	0.0608398	0.002079	0.0183511	0.00196995	0.000835263	0.822604
ZNF135	0	0	5.01445e-10	8.86589e-258	0.92416	0.492598	0.0607588	0.0019902	0.0183799	0.00144921	0.000614619	0.822604
BHLHE41	0	0	5.24104e-10	7.25427e-258	0.933353	0.491991	0.0614179	0.00209445	0.0184273	-0.0036646	0.00155481	0.822604
ADAP1	0	0	4.72689e-10	1.14277e-257	0.925212	0.495578	0.0608447	0.00210954	0.0184545	-0.00221895	0.00094167	0.822604
RHOBTB3	0	0	4.8381e-10	6.74944e-258	0.934015	0.502925	0.0602743	0.0021147	0.0185779	0.00166418	0.000706984	0.822604
CMIP	0	0	5.29833e-10	7.34182e-258	0.928613	0.496725	0.062694	0.00199388	0.0186453	-0.00301491	0.00128154	0.822604
KCNJ2	0	0	5.23451e-10	9.44343e-258	0.926508	0.492611	0.0608199	0.00212045	0.0186461	0.00613601	0.00260823	0.822604
SELL	0	0	5.35804e-10	8.17476e-258	0.922115	0.490056	0.0608438	0.00200121	0.0186587	-0.00421045	0.00178992	0.822604
GATAD1	0	0	5.32446e-10	9.04129e-258	0.922899	0.489981	0.061001	0.00209046	0.0189028	-0.00621705	0.00264841	0.822604
OR5H14	0	0	5.43602e-10	8.50668e-258	0.932075	0.495088	0.0610613	0.00189783	0.018903	-0.00265304	0.00113017	0.822604
PECR	0	0	5.27483e-10	6.51508e-258	0.923266	0.4971	0.062525	0.00202312	0.0189606	0.00281445	0.00119951	0.822604
FAM161B	0	0	5.24488e-10	9.29228e-258	0.928025	0.496419	0.0617015	0.00201597	0.0189639	-0.00230951	0.000984334	0.822604
FRG2C	0	0	5.3845e-10	8.66956e-258	0.928504	0.506742	0.0618838	0.00201075	0.0190144	-0.00159064	0.000678233	0.822604
GUCA1A	0	0	5.06525e-10	5.92969e-258	0.922442	0.495491	0.0611591	0.00215054	0.0190181	-0.00283438	0.00120859	0.822604
TM6SF2	0	0	5.32318e-10	8.11784e-258	0.919686	0.498981	0.0594256	0.00210427	0.0190201	0.00197975	0.000844184	0.822604
HID1	0	0	5.55293e-10	9.61445e-258	0.928185	0.4952	0.0608643	0.00206378	0.0190897	-0.00189214	0.000807296	0.822604
CREM	0	0	4.96211e-10	6.58848e-258	0.936501	0.493598	0.0601683	0.00221134	0.0191422	0.00182011	0.000776903	0.822604
PARM1	0	0	5.08468e-10	8.14878e-258	0.918021	0.494328	0.0624642	0.00227853	0.0192448	-0.00163828	0.000699888	0.822604
ALLC	0	0	5.44803e-10	7.51597e-258	0.930727	0.498113	0.061769	0.00203364	0.0193072	-0.00136679	0.000584205	0.822604
MINDY2	0	0	4.89063e-10	9.85128e-258	0.925489	0.493548	0.0610282	0.00218109	0.0193433	-0.00130586	0.000558331	0.822604
PROP1	0	0	4.99311e-10	1.12869e-257	0.920543	0.494231	0.0606613	0.00213141	0.0194261	-0.00322117	0.00137817	0.822604
XPO1	0	0	5.0593e-10	1.02995e-257	0.929075	0.493804	0.0607798	0.00200576	0.0194453	-0.00611205	0.00261544	0.822604
SYDE1	0	0	5.3131e-10	1.03403e-257	0.918973	0.489142	0.0615333	0.00204069	0.0194726	-0.00291734	0.00124866	0.822604
SDHD	0	0	5.05546e-10	1.09308e-257	0.930714	0.490211	0.0610643	0.00229629	0.0195777	0.00219482	0.000940218	0.822604
SPINK6	0	0	5.002e-10	9.18443e-258	0.936355	0.486786	0.0611224	0.00209488	0.019616	0.0105627	0.00452627	0.822604
PAPPA2	0	0	5.30931e-10	4.74807e-258	0.922048	0.49199	0.0599217	0.0020489	0.0196253	-0.00169137	0.000724833	0.822604
HIP1	0	0	5.02406e-10	6.74231e-258	0.932071	0.495872	0.0624123	0.00200971	0.0196339	-0.0016893	0.000723997	0.822604
LRRC59	0	0	5.23541e-10	8.59616e-258	0.923948	0.502172	0.0610773	0.00204263	0.0196759	-0.00322898	0.00138434	0.822604
PCK1	0	0	5.17764e-10	7.03525e-258	0.922573	0.490894	0.061181	0.0019757	0.0196866	-0.00116198	0.000498213	0.822604
MFHAS1	0	0	5.31275e-10	9.72828e-258	0.933995	0.488681	0.0608641	0.00198639	0.0198105	0.00183521	0.000787665	0.822604
DESI2	0	0	4.93956e-10	7.29567e-258	0.932642	0.499139	0.060186	0.00220686	0.0198167	0.00751655	0.00322623	0.822604
ETV1	0	0	5.22495e-10	1.22586e-257	0.930324	0.503514	0.0605726	0.00210498	0.019825	0.00379665	0.00162969	0.822604
COQ10A	0	0	5.04666e-10	1.18006e-257	0.922746	0.491191	0.0604956	0.00218448	0.0198971	0.00391491	0.00168144	0.822604
CLDND1	0	0	5.17359e-10	7.18962e-258	0.927509	0.491448	0.0601076	0.00219291	0.0199631	-0.00226798	0.000974608	0.822604
TMEM132A	0	0	5.29613e-10	9.07795e-258	0.923785	0.494476	0.0605357	0.00202178	0.0200217	-0.00128447	0.000552229	0.822604
GBP1	0	0	5.22226e-10	7.37891e-258	0.924228	0.494634	0.0624218	0.00187276	0.0200388	0.00214684	0.000923116	0.822604
KPNA2	0	0	5.14798e-10	6.67978e-258	0.925004	0.496129	0.0615791	0.00212571	0.0200393	0.00158783	0.000682751	0.822604
ZAR1	0	0	5.5382e-10	7.04004e-258	0.931115	0.488978	0.0591494	0.00218541	0.0200633	0.00338708	0.00145669	0.822604
HPSE	0	0	5.46656e-10	9.84291e-258	0.934898	0.496258	0.0620384	0.00203553	0.0200856	0.00139334	0.000599347	0.822604
F2RL1	0	0	5.66998e-10	6.17121e-258	0.934169	0.495879	0.0619609	0.00201805	0.0201628	0.00285703	0.00122971	0.822604
NOL4	0	0	5.38297e-10	9.46482e-258	0.919395	0.499972	0.0606208	0.00215325	0.0201693	-0.00199953	0.000860674	0.822604
CYBRD1	0	0	5.13491e-10	7.71644e-258	0.926878	0.49646	0.0609447	0.00207646	0.0202059	-0.00115518	0.000497378	0.822604
ZNF428	0	0	5.18119e-10	9.67996e-258	0.937349	0.489435	0.0611008	0.00211155	0.020251	0.00448594	0.00193219	0.822604
ALB	0	0	5.40518e-10	7.58846e-258	0.932434	0.495343	0.0592975	0.002134	0.0203503	0.00290448	0.00125201	0.822604
SAMD4A	0	0	5.11116e-10	6.04864e-258	0.926885	0.494935	0.0596116	0.00205475	0.0204147	0.00141736	0.000611282	0.822604
ATXN7L1	0	0	5.44067e-10	7.06399e-258	0.928529	0.498509	0.061471	0.00194012	0.0204242	-0.00185953	0.000802044	0.822604
RERE	0	0	5.36536e-10	8.976e-258	0.919709	0.499496	0.0610995	0.00214196	0.0204619	0.00155628	0.000671449	0.822604
CDK20	0	0	5.06385e-10	5.50078e-258	0.937319	0.490982	0.0602734	0.00213405	0.0205153	0.00169885	0.000733269	0.822604
GPRC5A	0	0	5.4148e-10	9.30864e-258	0.920822	0.491714	0.0604341	0.00222357	0.0205246	-0.0021309	0.000919824	0.822604
FAM149B1	0	0	5.56694e-10	7.08961e-258	0.921146	0.503051	0.061074	0.00203383	0.0205593	-0.0018764	0.000810186	0.822604
C20orf85	0	0	4.93134e-10	1.51406e-257	0.929235	0.492497	0.0592416	0.0021353	0.0205711	-0.00282215	0.00121866	0.822604
NOD1	0	0	5.08033e-10	9.19849e-258	0.926295	0.494145	0.0620418	0.00221208	0.020584	0.00159554	0.000689052	0.822604
FOXD4L1	0	0	5.29336e-10	1.27747e-257	0.938264	0.494909	0.060514	0.00205463	0.0206379	-0.00539095	0.00232914	0.822604
PARPBP	0	0	5.28176e-10	8.4977e-258	0.924757	0.48928	0.0595964	0.00211183	0.020706	-0.0024126	0.00104291	0.822604
METTL6	0	0	5.23812e-10	7.66789e-258	0.928511	0.493587	0.0616748	0.0020858	0.020712	-0.00476842	0.00206138	0.822604
PIGT	0	0	5.2536e-10	4.76567e-258	0.926175	0.490242	0.0595332	0.00218938	0.0207468	-0.00115168	0.000498003	0.822604
INHBA	0	0	5.25331e-10	1.22749e-257	0.925283	0.495226	0.0614686	0.00200631	0.0207937	-0.00234647	0.00101503	0.822705
TFR2	0	0	5.72257e-10	8.00038e-258	0.928397	0.494258	0.0610682	0.00192668	0.020961	0.00111395	0.000482498	0.823592
UBE2O	0	0	5.48747e-10	8.2644e-258	0.93525	0.495401	0.0605935	0.0019938	0.0209905	-0.00185109	0.00080197	0.823592
ZNF250	0	0	4.86981e-10	8.48359e-258	0.928459	0.487694	0.0604031	0.0020934	0.0210226	0.00509039	0.00220592	0.823592
CDON	0	0	5.37759e-10	7.45594e-258	0.91974	0.507484	0.0602554	0.00209743	0.0211514	0.00177118	0.000768311	0.823592
TOR4A	0	0	5.22273e-10	1.22458e-257	0.930355	0.499606	0.0622654	0.00204764	0.0211994	-0.00518191	0.00224866	0.823592
TMEM200C	0	0	5.38333e-10	7.88688e-258	0.930486	0.491461	0.0596771	0.002261	0.0212066	-0.00298765	0.00129655	0.823592
MSN	0	0	5.63857e-10	7.34673e-258	0.925032	0.493054	0.0616023	0.00207713	0.0212284	0.00640969	0.00278208	0.823592
EHD3	0	0	5.25289e-10	9.75027e-258	0.935311	0.494446	0.0599429	0.00223425	0.0212286	0.00307077	0.00133285	0.823592
ALX3	0	0	5.60775e-10	9.88986e-258	0.928427	0.497838	0.0614903	0.00209725	0.0212817	-0.00269182	0.00116884	0.823592
NRG3	0	0	5.49916e-10	7.52075e-258	0.928945	0.491073	0.0628285	0.00191214	0.0213065	-0.00149965	0.000651304	0.823592
BBIP1	0	0	5.14049e-10	1.18528e-257	0.931065	0.496076	0.0607068	0.00193204	0.0213281	0.0105541	0.00458447	0.823592
TLX2	0	0	5.33998e-10	8.43071e-258	0.9284	0.49638	0.0593522	0.00203502	0.0213488	-0.00284633	0.00123657	0.823592
SIM1	0	0	5.18802e-10	9.32036e-258	0.931528	0.496895	0.0603325	0.00226266	0.0214822	-0.00193832	0.000842959	0.825525
SNRNP200	0	0	5.52403e-10	8.29889e-258	0.923557	0.496202	0.063829	0.00201923	0.0214886	-0.00153584	0.000667956	0.825525
C9orf47	0	0	5.18964e-10	9.46247e-258	0.928236	0.491103	0.06084	0.00200208	0.0215918	-0.00282256	0.00122854	0.825525
OR4E2	0	0	5.05092e-10	1.44781e-257	0.926088	0.492214	0.0622358	0.00209357	0.0215931	0.00293942	0.00127941	0.825525
BICRA	0	0	5.05095e-10	9.09929e-258	0.926669	0.48946	0.0620407	0.00204683	0.0216693	-0.00126815	0.000552296	0.825525
ZBTB25	0	0	4.88055e-10	7.05439e-258	0.928132	0.491784	0.060901	0.00206128	0.0217258	-0.00176968	0.000771053	0.825525
SHANK2	0	0	5.18084e-10	1.01519e-257	0.919626	0.496738	0.0606281	0.00198575	0.0217945	-0.00135603	0.000591132	0.825525
C10orf113	0	0	5.48845e-10	8.67088e-258	0.937573	0.493359	0.0607877	0.00200845	0.0217958	0.00417539	0.00182019	0.825525
SYN2	0	0	4.94576e-10	9.17706e-258	0.925787	0.500364	0.0604099	0.00191903	0.0217993	0.00645214	0.00281277	0.825525
OR13C2	0	0	5.33393e-10	9.62126e-258	0.930971	0.497337	0.0608372	0.00198011	0.0219802	0.00525232	0.00229285	0.829984
RNF216	0	0	5.78459e-10	1.08406e-257	0.935293	0.496189	0.0604565	0.00208825	0.0220065	0.00190627	0.000832328	0.829984
B4GAT1	0	0	5.53176e-10	8.57909e-258	0.931918	0.492211	0.0614333	0.00206669	0.0223479	0.00571673	0.00250248	0.837342
NDE1	0	0	5.30874e-10	9.06389e-258	0.925115	0.493205	0.0597145	0.00200581	0.0224236	0.00326628	0.00143061	0.837342
FAM98B	0	0	4.75585e-10	7.53537e-258	0.928439	0.494265	0.061874	0.00224482	0.0224572	-0.0022109	0.000968602	0.837342
TRMT11	0	0	5.18358e-10	6.84003e-258	0.92883	0.491565	0.0606742	0.00202161	0.0225162	-0.00224808	0.000985324	0.837342
IMPA1	0	0	5.36366e-10	8.05636e-258	0.91583	0.491862	0.0613011	0.00201706	0.0225744	0.00360055	0.00157878	0.837342
PTPRO	0	0	4.99235e-10	1.02135e-257	0.925117	0.490228	0.0607252	0.00203089	0.0226267	-0.00179292	0.000786469	0.837342
MAP3K8	0	0	5.02165e-10	7.13867e-258	0.933009	0.495173	0.0599997	0.00208357	0.0227234	0.00333845	0.00146547	0.837342
TMEM143	0	0	5.37956e-10	1.07853e-257	0.926285	0.495248	0.0611659	0.00206964	0.0227557	0.00204694	0.00089875	0.837342
CHST2	0	0	5.24377e-10	6.69244e-258	0.932755	0.496533	0.0611164	0.00197477	0.0227561	0.0028964	0.00127173	0.837342
RAB9B	0	0	5.19357e-10	1.29748e-257	0.927766	0.496002	0.0612095	0.00212045	0.0227573	0.0186129	0.00817248	0.837342
ATP5H	0	0	4.93538e-10	7.16334e-258	0.930479	0.498179	0.0609723	0.00201002	0.022966	0.00611105	0.00268733	0.837342
STAMBPL1	0	0	5.40521e-10	7.2899e-258	0.924739	0.490649	0.0617686	0.00195267	0.0230414	-0.00179815	0.000791171	0.837342
SF3A3	0	0	5.12532e-10	1.0766e-257	0.92719	0.493955	0.0614432	0.00203291	0.0231028	0.00525558	0.00231345	0.837342
NRIP1	0	0	5.11761e-10	8.80742e-258	0.924925	0.490726	0.0610333	0.0021413	0.0231998	0.00176478	0.000777383	0.837342
NUBPL	0	0	5.36131e-10	7.7318e-258	0.933478	0.491088	0.0610945	0.00202643	0.0232125	0.00151617	0.000667934	0.837342
RPL10A	0	0	5.31745e-10	7.5686e-258	0.933938	0.491509	0.0605933	0.00203712	0.0232283	0.00906696	0.00399481	0.837342
EFCAB12	0	0	5.26263e-10	7.04401e-258	0.933604	0.493254	0.0603334	0.00209954	0.0232497	-0.00237624	0.00104711	0.837342
SLC25A39	0	0	5.35993e-10	6.69459e-258	0.935639	0.4881	0.0592598	0.00210372	0.0233366	0.00335197	0.001478	0.837342
MIA2	0	0	5.52652e-10	8.14714e-258	0.93391	0.493534	0.0630629	0.00192783	0.0233467	-0.00131139	0.00057828	0.837342
GTDC1	0	0	5.28114e-10	5.3765e-258	0.932445	0.492982	0.0621223	0.00208433	0.023356	-0.00186283	0.000821504	0.837342
ZNF239	0	0	5.07108e-10	9.39837e-258	0.930329	0.484828	0.0615191	0.00214391	0.0234207	0.00310654	0.00137062	0.837342
MTNR1B	0	0	5.64132e-10	8.3143e-258	0.932723	0.501452	0.0604333	0.00191981	0.0234285	-0.0015288	0.00067455	0.837342
NKAIN2	0	0	5.21701e-10	7.57868e-258	0.927296	0.496617	0.0599085	0.00205231	0.0234404	-0.00567475	0.00250408	0.837342
NOV	0	0	5.71984e-10	1.01271e-257	0.936584	0.490618	0.0597828	0.00204893	0.0234669	0.00298349	0.00131677	0.837342
ACOT12	0	0	5.09309e-10	1.17172e-257	0.9276	0.495153	0.0598887	0.00199443	0.0234733	0.00124629	0.000550077	0.837342
ENO1	0	0	5.65893e-10	7.49102e-258	0.921816	0.49924	0.0594145	0.00207319	0.0234995	0.00216698	0.000956624	0.837342
SLC44A4	0	0	5.47029e-10	6.82073e-258	0.934325	0.500277	0.0603102	0.00199477	0.023515	-0.00168499	0.00074393	0.837342
HEY1	0	0	5.51008e-10	8.14751e-258	0.931243	0.496646	0.0620151	0.00197708	0.0235165	0.0019093	0.00084297	0.837342
NYAP2	0	0	5.14674e-10	7.13215e-258	0.930349	0.497619	0.0625068	0.00196342	0.0235906	0.00137634	0.000607989	0.837342
NRAP	0	0	5.44719e-10	1.16076e-257	0.926967	0.494392	0.0601702	0.00203884	0.023741	-0.000709946	0.000313952	0.837342
UGCG	0	0	5.18228e-10	6.35751e-258	0.920604	0.483318	0.0619945	0.00210918	0.0239419	-0.00386019	0.0017095	0.837342
EFHB	0	0	5.49703e-10	8.23968e-258	0.930219	0.492165	0.0606786	0.00208196	0.0240141	0.00125999	0.000558279	0.837342
LIN37	0	0	4.96296e-10	8.58312e-258	0.925413	0.492626	0.0595808	0.00209666	0.0240575	0.00161776	0.00071702	0.837342
HLA-DPA1	0	0	5.1366e-10	7.29599e-258	0.938238	0.49662	0.0617397	0.00217292	0.0240636	0.00206885	0.000916988	0.837342
NEBL	0	0	5.67411e-10	7.34362e-258	0.927422	0.494333	0.0615219	0.0021889	0.0242499	-0.000855706	0.000379779	0.837342
RNF150	0	0	5.62164e-10	1.09804e-257	0.924426	0.50062	0.0601434	0.00201368	0.02433	-0.00240523	0.00106809	0.837342
VTI1B	0	0	5.48351e-10	7.60874e-258	0.934815	0.494628	0.0604598	0.00213057	0.0245734	0.0014821	0.000659279	0.837342
ARHGAP23	0	0	5.50856e-10	6.50313e-258	0.916852	0.497148	0.0635235	0.0020221	0.0245768	-0.000826639	0.00036772	0.837342
FAM9A	0	0	5.29542e-10	6.13635e-258	0.92631	0.4978	0.06103	0.00206449	0.0246073	-0.00506497	0.00225357	0.837342
SPDYE6	0	0	5.44301e-10	8.59311e-258	0.921099	0.501014	0.0618085	0.00204207	0.0246169	-0.0397872	0.0177038	0.837342
LEO1	0	0	5.28185e-10	7.56208e-258	0.931917	0.491043	0.0616439	0.00195877	0.0246477	-0.0037222	0.00165659	0.837342
MT4	0	0	5.41651e-10	6.63162e-258	0.919262	0.497583	0.062488	0.00207319	0.0247219	-0.00647101	0.00288145	0.837342
BOP1	0	0	5.37111e-10	4.44961e-258	0.932298	0.498136	0.0618126	0.00200785	0.0247707	0.00136507	0.000608053	0.837342
SLC38A7	0	0	5.22711e-10	6.267e-258	0.930477	0.493975	0.059839	0.00204295	0.0248409	0.00279529	0.00124573	0.837342
DCAF5	0	0	5.10853e-10	7.93208e-258	0.936054	0.496773	0.0623837	0.00189221	0.0248877	-0.00190845	0.000850784	0.837342
WDR70	0	0	5.16413e-10	1.05566e-257	0.924054	0.495963	0.0611957	0.00209368	0.0248933	-0.00297413	0.00132591	0.837342
ATP2B3	0	0	5.43632e-10	5.17401e-258	0.929249	0.491871	0.0621349	0.00208736	0.0249444	-0.00265675	0.00118484	0.837342
SPRR2E	0	0	5.25939e-10	7.89408e-258	0.93026	0.491473	0.0607832	0.00207415	0.0251301	-0.011243	0.00502048	0.837342
ZNF682	0	0	5.16775e-10	6.48357e-258	0.926667	0.496773	0.0614348	0.00189941	0.0251311	-0.00304366	0.00135914	0.837342
DOLPP1	0	0	5.03241e-10	1.02367e-257	0.924313	0.495022	0.0615589	0.00208887	0.0251434	0.00697863	0.00311655	0.837342
MLLT11	0	0	5.21933e-10	1.15495e-257	0.928111	0.502379	0.0583954	0.00218314	0.0251932	0.0143244	0.00639923	0.837342
PDCL2	0	0	5.35607e-10	8.99531e-258	0.928208	0.499066	0.0614103	0.00211756	0.0252048	-0.00356825	0.0015942	0.837342
PANK4	0	0	5.45199e-10	6.45498e-258	0.928598	0.496185	0.0631521	0.00205987	0.0252063	0.00243879	0.0010896	0.837342
TMEM238	0	0	5.22906e-10	9.22212e-258	0.926802	0.499072	0.0603496	0.00213047	0.0253117	0.00758583	0.00339163	0.837342
DNMT3A	0	0	3.90831e-10	1.1196e-257	0.929818	0.489255	0.0607928	0.00210615	0.0254321	0.00173278	0.000775365	0.837342
RPAP3	0	0	5.24673e-10	8.13443e-258	0.925465	0.49001	0.0595256	0.00206801	0.0255027	-0.00180433	0.000807766	0.837342
ADSL	0	0	5.47692e-10	6.38011e-258	0.920262	0.497056	0.0600749	0.00206891	0.0255301	-0.00205173	0.000918694	0.837342
ABCB11	0	0	5.37779e-10	8.41318e-258	0.934969	0.496859	0.0607691	0.0020145	0.0255602	0.0014357	0.000642988	0.837342
KLRF2	0	0	5.24115e-10	1.17154e-257	0.927264	0.490153	0.0609812	0.00192172	0.0255738	0.00192715	0.00086317	0.837342
TRA2A	0	0	5.42848e-10	7.25651e-258	0.923961	0.492562	0.0612794	0.00200521	0.0255983	-0.00362953	0.00162593	0.837342
VAT1L	0	0	5.61105e-10	5.60252e-258	0.939466	0.496933	0.0603809	0.00214145	0.0256297	0.00260396	0.00116675	0.837342
ASAH2B	0	0	5.1893e-10	6.99763e-258	0.940021	0.495788	0.0600826	0.00193595	0.0256636	0.00666206	0.00298575	0.837342
OR5T1	0	0	4.90332e-10	7.24686e-258	0.917322	0.499695	0.0615309	0.00205015	0.0256789	0.00379361	0.00170036	0.837342
ZNF296	0	0	5.4574e-10	7.8701e-258	0.927175	0.494131	0.0618406	0.0020352	0.0257017	0.00331508	0.00148611	0.837342
SLC4A3	0	0	5.50791e-10	6.20173e-258	0.928228	0.49351	0.0613159	0.00197969	0.0257545	-0.0012839	0.000575761	0.837342
LPAR1	0	0	5.5839e-10	6.7914e-258	0.929862	0.496332	0.0614317	0.00220464	0.0257803	0.00554126	0.0024854	0.837342
PITX3	0	0	5.49048e-10	7.94142e-258	0.933334	0.491197	0.0611179	0.00209457	0.0257813	0.00411728	0.00184672	0.837342
CYP4V2	0	0	5.79531e-10	8.17363e-258	0.924585	0.488185	0.0616046	0.00209734	0.0258114	0.00115851	0.000519729	0.837342
SSBP4	0	0	5.08028e-10	8.40442e-258	0.937559	0.493689	0.0608628	0.00219423	0.0258116	0.00256863	0.00115234	0.837342
RPS15	0	0	5.15699e-10	8.18047e-258	0.921189	0.49287	0.0603729	0.00206387	0.025885	0.00264777	0.00118843	0.837342
TUBB4A	0	0	5.17161e-10	1.04494e-257	0.937465	0.493826	0.0603694	0.00208298	0.0259207	-0.00382552	0.00171747	0.837342
YARS	0	0	5.12198e-10	7.03103e-258	0.929313	0.492328	0.0608537	0.00204897	0.0259839	-0.00259491	0.00116548	0.837342
CYP51A1	0	0	5.57137e-10	8.46778e-258	0.925461	0.489941	0.0606786	0.00210858	0.0260597	-0.00275158	0.00123647	0.837342
ZCCHC9	0	0	5.42834e-10	9.09599e-258	0.926077	0.496395	0.0618389	0.00213222	0.0260731	-0.00323087	0.00145198	0.837342
WIPI1	0	0	5.062e-10	7.37242e-258	0.933077	0.492636	0.0608188	0.00211372	0.0260822	-0.00214407	0.000963623	0.837342
SP9	0	0	5.14142e-10	9.57675e-258	0.922075	0.491604	0.0602073	0.00218165	0.0260991	0.00418895	0.00188288	0.837342
TNRC6C	0	0	4.94942e-10	9.34185e-258	0.92419	0.493005	0.0587621	0.00197732	0.0261046	0.0012286	0.000552259	0.837342
SIPA1	0	0	5.24856e-10	7.98945e-258	0.928431	0.495606	0.0604301	0.00209014	0.0261145	0.00131998	0.000593375	0.837342
STX2	0	0	5.25628e-10	5.41698e-258	0.925275	0.494539	0.0605225	0.0020044	0.026194	-0.0044379	0.00199605	0.837342
TFPI	0	0	5.28311e-10	6.36797e-258	0.921837	0.492524	0.0619463	0.00209252	0.026242	-0.00430586	0.00193728	0.837342
CSNK1G1	0	0	5.36559e-10	8.48225e-258	0.925126	0.489644	0.0598935	0.00208936	0.0262549	0.0021617	0.000972668	0.837342
PPA2	0	0	5.63743e-10	7.41239e-258	0.929879	0.499511	0.0609277	0.00201564	0.0262951	0.00165636	0.000745487	0.837342
ANKRD55	0	0	5.60737e-10	7.20627e-258	0.924176	0.493167	0.0603241	0.00204921	0.0263641	-0.00110285	0.000496592	0.837342
CYP2A6	0	0	5.49939e-10	9.97532e-258	0.929282	0.485251	0.0630066	0.00209647	0.0263941	0.00177382	0.000798877	0.837342
TTC38	0	0	5.13702e-10	8.17402e-258	0.922473	0.49418	0.0602767	0.00200585	0.02641	-0.000901091	0.000405869	0.837342
ALKBH7	0	0	5.41644e-10	8.53963e-258	0.923911	0.496726	0.0613608	0.002153	0.0264655	0.00320381	0.00144359	0.837342
KRT77	0	0	5.68194e-10	7.10538e-258	0.926382	0.497919	0.0597477	0.00202236	0.0264724	-0.00338024	0.00152316	0.837342
PLPBP	0	0	5.02503e-10	9.88384e-258	0.928603	0.495645	0.061073	0.00207206	0.0266305	0.00213443	0.000962793	0.837342
C1orf189	0	0	5.28783e-10	9.24062e-258	0.93016	0.492069	0.0610909	0.00209073	0.0267458	0.00845877	0.00381846	0.837342
PNMA1	0	0	5.41343e-10	5.41809e-258	0.923877	0.496113	0.0620354	0.00202632	0.0268471	0.00447823	0.00202291	0.837342
GOLGA6L9	0	0	5.36288e-10	5.85071e-258	0.927427	0.494604	0.0625304	0.00205125	0.0268521	-0.00495853	0.00223994	0.837342
LONRF1	0	0	5.09426e-10	1.08391e-257	0.927993	0.490041	0.0614913	0.00198688	0.0268614	-0.00247745	0.00111922	0.837342
TMEM39B	0	0	5.43842e-10	5.96937e-258	0.933394	0.492803	0.0619961	0.00192647	0.0269185	0.00334061	0.00150973	0.837342
BAK1	0	0	5.31219e-10	5.7238e-258	0.922188	0.491749	0.0609071	0.00210782	0.0270562	-0.00297685	0.00134655	0.837342
KLK11	0	0	5.43059e-10	9.59531e-258	0.920425	0.497191	0.0620574	0.00206878	0.0271351	0.00338735	0.00153302	0.837342
MAPK3	0	0	5.29662e-10	7.74074e-258	0.923222	0.493434	0.0614635	0.00209181	0.0271894	-0.00204534	0.00092599	0.837342
TTLL10	0	0	5.37397e-10	7.60315e-258	0.938588	0.493544	0.0604804	0.00207227	0.0271901	0.00176881	0.000800803	0.837342
FUT11	0	0	5.043e-10	8.21145e-258	0.92688	0.493433	0.0613035	0.00210684	0.027202	-0.00154396	0.000699056	0.837342
LYST	0	0	5.49316e-10	1.35608e-257	0.929812	0.49787	0.0613964	0.00204906	0.0272556	-0.000823169	0.000372836	0.837342
ARNT2	0	0	5.25393e-10	9.94554e-258	0.930501	0.499717	0.0602152	0.00212342	0.0272751	-0.00175831	0.000796486	0.837342
E2F8	0	0	5.08771e-10	1.46095e-257	0.92646	0.494446	0.0606237	0.00202887	0.0273004	0.00185465	0.000840266	0.837342
ERCC1	0	0	5.23304e-10	7.10356e-258	0.920452	0.493389	0.0602358	0.00207147	0.0273074	0.00307838	0.00139475	0.837342
S100A2	0	0	5.15699e-10	8.25121e-258	0.929023	0.491518	0.0609378	0.00209114	0.0273912	-0.00343077	0.00155526	0.837342
ACVR1C	0	0	5.23651e-10	6.00455e-258	0.928856	0.496662	0.0600938	0.00193314	0.0274185	0.00221113	0.00100254	0.837342
DNAL1	0	0	5.21634e-10	7.94064e-258	0.924059	0.49199	0.0601164	0.00207915	0.0275922	0.00434243	0.00197109	0.837342
FOSL2	0	0	5.34724e-10	7.02028e-258	0.926335	0.493792	0.0618793	0.00195492	0.0275958	0.00354676	0.00160996	0.837342
ESRRB	0	0	5.19062e-10	7.97279e-258	0.92407	0.497844	0.059564	0.00215953	0.0276489	-0.00314362	0.00142746	0.837342
PPP4C	0	0	5.55469e-10	9.25112e-258	0.918111	0.49634	0.0616172	0.00209076	0.0277109	0.00841552	0.00382284	0.837342
MSANTD4	0	0	5.24589e-10	9.33529e-258	0.930461	0.494019	0.0617031	0.00217061	0.02772	0.00584628	0.00265589	0.837342
CGA	0	0	5.29255e-10	6.7365e-258	0.924273	0.498128	0.0620433	0.00205924	0.0277966	0.010635	0.00483375	0.837342
C19orf18	0	0	5.48108e-10	6.77482e-258	0.926747	0.498635	0.0608897	0.00217149	0.0278033	0.00493256	0.002242	0.837342
G0S2	0	0	5.03638e-10	1.07044e-257	0.931911	0.490226	0.0600505	0.00202721	0.0278074	0.0075239	0.00341993	0.837342
NFYB	0	0	5.11472e-10	6.71794e-258	0.93619	0.488738	0.0609139	0.00204791	0.0278313	-0.0093682	0.0042589	0.837342
GAS1	0	0	5.34227e-10	1.14756e-257	0.925873	0.500561	0.0598985	0.0020683	0.0278551	-0.002949	0.00134085	0.837342
ZNF419	0	0	5.20557e-10	6.7694e-258	0.929276	0.494164	0.061638	0.00205494	0.0278656	-0.00145432	0.000661297	0.837342
CCDC73	0	0	5.4766e-10	7.08333e-258	0.927255	0.497257	0.0613636	0.002204	0.0278846	-0.00131035	0.000595903	0.837342
CXCL17	0	0	5.05663e-10	7.84412e-258	0.935093	0.492332	0.0614986	0.00205946	0.027885	0.0109769	0.00499197	0.837342
DCLRE1A	0	0	5.37939e-10	6.5966e-258	0.935889	0.490285	0.060738	0.00210012	0.0279344	0.000771107	0.000350786	0.837342
PDSS1	0	0	5.21518e-10	6.57948e-258	0.926339	0.495319	0.0599832	0.00203645	0.0279384	-0.00241915	0.00110053	0.837342
C2orf50	0	0	5.21896e-10	9.81633e-258	0.927837	0.499502	0.0629517	0.00203538	0.0279534	0.0068069	0.00309692	0.837342
EPS8L1	0	0	5.26742e-10	6.74063e-258	0.932783	0.492239	0.0616883	0.0021143	0.0280111	-0.00149606	0.00068091	0.837342
FOXA2	0	0	5.50213e-10	8.92056e-258	0.92921	0.498372	0.0610522	0.00210057	0.0280491	-0.00326204	0.00148503	0.837342
FAM168A	0	0	5.25046e-10	6.53831e-258	0.925161	0.493342	0.060795	0.00213962	0.0280503	0.00320898	0.00146088	0.837342
SLC12A2	0	0	5.0994e-10	6.68747e-258	0.92367	0.493712	0.0620215	0.00208908	0.0280907	-0.00236913	0.00107882	0.837342
RECQL4	0	0	5.28358e-10	9.30184e-258	0.930392	0.492621	0.061379	0.00213828	0.0281682	0.000939966	0.000428239	0.837342
DAD1	0	0	5.26119e-10	8.90199e-258	0.9252	0.491805	0.0597768	0.00208374	0.0281946	-0.00765426	0.00348779	0.837342
ENTPD7	0	0	4.99836e-10	7.55721e-258	0.920307	0.495783	0.06159	0.00201545	0.0281956	-0.00238041	0.00108468	0.837342
ITPR1	0	0	5.72877e-10	9.45199e-258	0.939094	0.501721	0.0613413	0.00206891	0.028208	0.00134739	0.00061401	0.837342
CHTOP	0	0	5.18758e-10	8.96231e-258	0.930831	0.490087	0.0590796	0.00208818	0.0282235	-0.00501082	0.00228368	0.837342
ABCA12	0	0	5.26815e-10	7.88315e-258	0.934641	0.494585	0.0611232	0.00209624	0.0282306	0.00117058	0.000533515	0.837342
IL1RAPL1	0	0	5.41208e-10	6.32351e-258	0.922694	0.500011	0.0605534	0.00199626	0.0282706	0.00423153	0.0019291	0.837342
MICB	0	0	4.97468e-10	8.35701e-258	0.930789	0.493481	0.0626217	0.00197515	0.0283155	0.00499502	0.00227781	0.837342
TIAF1	0	0	5.46556e-10	6.91574e-258	0.935953	0.498162	0.0597291	0.00192994	0.0284139	-0.00645625	0.00294598	0.837342
LRRTM3	0	0	5.43382e-10	1.02936e-257	0.924739	0.491562	0.0621161	0.00205587	0.0284183	-0.00427853	0.00195234	0.837342
CD81	0	0	5.3825e-10	1.08634e-257	0.922279	0.492165	0.0622264	0.00206747	0.028426	0.0047005	0.002145	0.837342
IDE	0	0	5.03915e-10	1.10507e-257	0.918073	0.504126	0.0612873	0.00202576	0.0285263	-0.00260411	0.0011891	0.837342
RPL18	0	0	5.14458e-10	6.65058e-258	0.925163	0.490626	0.0606194	0.00200607	0.0286066	-0.00287994	0.00131571	0.837342
APOA5	0	0	5.46572e-10	7.74719e-258	0.926503	0.495711	0.060191	0.00217396	0.0286068	0.00232452	0.00106196	0.837342
HYPM	0	0	5.24962e-10	6.28628e-258	0.924442	0.495775	0.0601679	0.00202518	0.0286404	-0.00905932	0.00413966	0.837342
KIDINS220	0	0	5.25287e-10	9.73519e-258	0.923153	0.496531	0.0584807	0.00214284	0.0286606	-0.00165248	0.000755196	0.837342
TSPAN33	0	0	4.99251e-10	7.47096e-258	0.927691	0.492555	0.061125	0.00210256	0.0286612	-0.00346513	0.0015836	0.837342
DDX4	0	0	5.23975e-10	1.05807e-257	0.926962	0.492908	0.061073	0.00200775	0.0287311	-0.00163681	0.000748366	0.837342
STMND1	0	0	5.47618e-10	7.69877e-258	0.93196	0.498263	0.0625372	0.00208987	0.0287464	0.00518317	0.00237002	0.837342
GTSF1	0	0	5.12292e-10	6.8262e-258	0.930595	0.492175	0.0609749	0.00209421	0.0287575	0.00399529	0.00182699	0.837342
BUD13	0	0	4.96057e-10	1.04346e-257	0.940298	0.49445	0.0597749	0.00217967	0.0288087	-0.00155324	0.000710504	0.837342
B3GALT1	0	0	5.35522e-10	8.71556e-258	0.917255	0.498246	0.060273	0.00212999	0.0288914	0.0057253	0.00262029	0.837342
ADAM28	0	0	5.15347e-10	1.23464e-257	0.928882	0.49332	0.0592488	0.00207099	0.0289731	0.00151974	0.00069589	0.837342
TMEM266	0	0	5.48223e-10	8.97316e-258	0.925237	0.494276	0.0610261	0.00195483	0.0290254	0.00149837	0.000686329	0.837342
SEC14L5	0	0	5.38152e-10	1.06058e-257	0.924652	0.491551	0.0614991	0.00209219	0.0290583	0.00157628	0.000722165	0.837342
SURF6	0	0	5.12638e-10	5.53208e-258	0.925947	0.498323	0.0608698	0.00173593	0.0290912	0.00171006	0.000783616	0.837342
SLC22A23	0	0	4.93547e-10	1.02974e-257	0.922312	0.491023	0.0609253	0.00218805	0.029152	-0.00238165	0.00109177	0.837342
FAM96A	0	0	5.2524e-10	1.11192e-257	0.922893	0.499598	0.0603454	0.00186584	0.0291587	0.00284316	0.00130339	0.837342
JAK1	0	0	4.89561e-10	6.76162e-258	0.923758	0.495822	0.0629661	0.0019695	0.0292037	-0.00181354	0.000831614	0.837342
NUP107	0	0	5.05778e-10	6.46318e-258	0.925584	0.494142	0.0592875	0.00209934	0.0292143	0.0018973	0.000870081	0.837342
MYH10	0	0	5.29971e-10	4.0131e-258	0.938627	0.497814	0.06093	0.00215758	0.0292717	-0.00141293	0.000648184	0.837342
GFM1	0	0	4.89394e-10	7.74102e-258	0.930324	0.49728	0.0613471	0.00205291	0.0292814	-0.00240845	0.00110495	0.837342
PKP2	0	0	5.12307e-10	7.30484e-258	0.928085	0.492126	0.0592193	0.00210401	0.0292862	0.000806981	0.000370237	0.837342
FAM120AOS	0	0	5.23499e-10	7.41667e-258	0.920361	0.488899	0.0604575	0.00203962	0.0293976	-0.01522	0.00698764	0.837443
EIF4E2	0	0	5.52415e-10	6.62214e-258	0.928893	0.488258	0.0619154	0.00210641	0.0293978	0.00462701	0.0021243	0.837443
FEZ1	0	0	5.32177e-10	5.98718e-258	0.935861	0.493404	0.0606925	0.00211854	0.0294483	0.00279974	0.00128579	0.837443
SLC25A21	0	0	5.23908e-10	6.31294e-258	0.929076	0.491897	0.0602195	0.00209861	0.0294991	0.00181651	0.000834498	0.837443
PPP3R1	0	0	5.51366e-10	7.0347e-258	0.927897	0.487543	0.0607774	0.00205726	0.0295154	0.0285953	0.0131379	0.837443
SNX2	0	0	4.95178e-10	1.03961e-257	0.919588	0.491525	0.062598	0.0021635	0.0296662	-0.00242155	0.00111359	0.838249
ZNF154	0	0	5.48714e-10	1.45893e-257	0.932983	0.494124	0.0603164	0.00201375	0.0297269	-0.00292339	0.00134487	0.838249
CYSRT1	0	0	5.13159e-10	7.20828e-258	0.925093	0.497227	0.0609528	0.0021071	0.0297334	0.00206481	0.000949928	0.838249
JMJD8	0	0	5.47259e-10	7.29809e-258	0.934712	0.49739	0.0613034	0.00208239	0.0297475	-0.00135529	0.000623562	0.838249
IL2RA	0	0	5.26489e-10	6.24459e-258	0.926799	0.493136	0.0607212	0.00211523	0.0298796	0.00560242	0.00257974	0.838249
HOMEZ	0	0	5.40307e-10	7.1661e-258	0.928853	0.491822	0.0618002	0.00203708	0.0299078	-0.00315939	0.00145505	0.838249
ADAM20	0	0	5.51665e-10	9.2539e-258	0.929846	0.501975	0.0627383	0.00204746	0.0299187	-0.00194641	0.000896473	0.838249
CLEC2A	0	0	5.05872e-10	9.74993e-258	0.925991	0.497048	0.0603728	0.00205075	0.0299249	-0.00285602	0.00131547	0.838249
SCARB1	0	0	5.45618e-10	6.5064e-258	0.926852	0.500488	0.0611758	0.00213892	0.0299504	-0.00177374	0.000817102	0.838249
SERPINB11	0	0	5.13003e-10	1.07476e-257	0.926948	0.483777	0.0624592	0.00203917	0.0301789	0.0016611	0.000766276	0.843372
RAB3IL1	0	0	5.19186e-10	1.17665e-257	0.923129	0.495842	0.0593485	0.00217818	0.0303321	-0.00250688	0.00115751	0.843695
BAZ2A	0	0	5.1411e-10	7.74628e-258	0.937607	0.492631	0.0597896	0.00210218	0.0303802	-0.00108436	0.000500834	0.843695
ABCA1	0	0	5.27288e-10	5.39438e-258	0.933055	0.498934	0.0600579	0.00222091	0.0304573	0.000959693	0.000443458	0.843695
HEMK1	0	0	5.25082e-10	9.32926e-258	0.91982	0.489748	0.0627875	0.00196767	0.0305155	-0.00344408	0.00159201	0.843695
CDC25C	0	0	5.27733e-10	6.65616e-258	0.92587	0.492652	0.0612218	0.00210346	0.0305167	0.00238989	0.00110472	0.843695
FRS2	0	0	5.26296e-10	6.35121e-258	0.927407	0.500369	0.0612425	0.00220145	0.0305167	0.00371719	0.00171826	0.843695
XRCC6	0	0	5.12901e-10	1.10721e-257	0.921258	0.49603	0.0612164	0.00194716	0.030546	0.00443615	0.00205096	0.843695
C1GALT1	0	0	5.29323e-10	8.28088e-258	0.934991	0.496868	0.0613821	0.0020511	0.0305541	-0.00486805	0.00225076	0.843695
SERTM1	0	0	4.76209e-10	8.48512e-258	0.926789	0.494471	0.0622328	0.00201215	0.0306009	0.0161984	0.00749145	0.843731
HSPA6	0	0	5.57952e-10	8.84961e-258	0.932732	0.489451	0.0615576	0.00210954	0.0306467	-0.00183796	0.000850256	0.843738
BDH1	0	0	5.48737e-10	1.02158e-257	0.924753	0.497027	0.0612939	0.00234525	0.0307377	0.00180287	0.000834478	0.844898
MSX1	0	0	5.42192e-10	7.81016e-258	0.929163	0.493154	0.0597492	0.00207573	0.030801	-0.00319781	0.0014807	0.844898
JRKL	0	0	5.56578e-10	7.17916e-258	0.922879	0.493261	0.0602501	0.00213504	0.0309137	0.00419442	0.00194348	0.844898
NAALAD2	0	0	5.59434e-10	1.11962e-257	0.917816	0.494767	0.0628775	0.00204636	0.0309238	-0.00168669	0.000781573	0.844898
CYP1A1	0	0	5.32885e-10	8.68608e-258	0.930882	0.496777	0.0629613	0.00188397	0.0309479	-0.00098472	0.000456361	0.844898
ZDHHC11	0	0	5.22402e-10	9.43994e-258	0.931644	0.496072	0.0605536	0.00200412	0.030962	0.00319832	0.00148236	0.844898
SLC39A12	0	0	5.28881e-10	1.01804e-257	0.924205	0.494878	0.0608857	0.00204902	0.0310312	-0.00221133	0.00102534	0.845542
CHMP1B	0	0	5.16991e-10	8.17351e-258	0.922345	0.492489	0.0615205	0.00209039	0.0311491	-0.00515453	0.00239169	0.846711
REEP4	0	0	5.32188e-10	5.30084e-258	0.928254	0.498794	0.0615307	0.00220227	0.0311958	0.00139189	0.000646015	0.846711
ARL14EP	0	0	4.92127e-10	8.56535e-258	0.927251	0.490802	0.0610808	0.00205883	0.0312175	-0.00621421	0.00288455	0.846711
FAM209A	0	0	5.14376e-10	8.47992e-258	0.925257	0.495748	0.0609369	0.00201748	0.0312675	0.0045503	0.00211281	0.846711
RALB	0	0	5.18376e-10	9.07969e-258	0.925552	0.498197	0.06163	0.00211048	0.0313196	0.00640312	0.00297403	0.846711
CNOT2	0	0	5.20129e-10	6.31243e-258	0.92698	0.496494	0.0600965	0.00215454	0.031394	-0.00614547	0.00285562	0.846711
HDAC9	0	0	5.03592e-10	6.80261e-258	0.926547	0.49535	0.0606625	0.00214671	0.0314748	0.00186324	0.000866205	0.846711
EIF3J	0	0	5.56562e-10	8.5968e-258	0.931234	0.495348	0.0617242	0.0019336	0.0314916	0.0053926	0.00250722	0.846711
SLC34A3	0	0	5.37356e-10	6.25281e-258	0.923386	0.488941	0.0608723	0.00215027	0.0315914	0.00124057	0.000577127	0.846711
EYA2	0	0	5.04748e-10	8.96899e-258	0.931449	0.494762	0.0611659	0.00223443	0.0316208	-0.00135887	0.00063227	0.846711
EPO	0	0	5.55606e-10	7.17696e-258	0.921467	0.495561	0.0618561	0.00197821	0.0316904	-0.00177781	0.000827537	0.846711
CYP7B1	0	0	5.34663e-10	9.65343e-258	0.933538	0.490784	0.0607198	0.00210175	0.0316926	0.00232083	0.00108032	0.846711
FARP1	0	0	5.29449e-10	6.92562e-258	0.929452	0.487697	0.0602358	0.00212632	0.0317401	-0.000905796	0.000421754	0.846711
DKK2	0	0	4.89566e-10	8.68982e-258	0.923825	0.494816	0.0599313	0.00212419	0.0317604	-0.00317412	0.0014781	0.846711
MMP14	0	0	5.11626e-10	4.9966e-258	0.935572	0.495945	0.0611867	0.00220596	0.0318704	0.00165006	0.000768881	0.846711
SRGAP2B	0	0	5.34207e-10	7.35032e-258	0.927878	0.492265	0.0609766	0.00210898	0.0318705	0.0187532	0.00873847	0.846711
MRPL20	0	0	5.4555e-10	7.73815e-258	0.933453	0.499075	0.0598934	0.00220749	0.0318919	0.0040825	0.00190257	0.846711
SEC16A	0	0	5.41279e-10	8.12006e-258	0.930566	0.493685	0.0602687	0.00205393	0.0320119	-0.00102678	0.000478847	0.846711
DPY19L2	0	0	5.00089e-10	8.68957e-258	0.921699	0.497688	0.0610678	0.00208203	0.0320151	0.00189093	0.000881863	0.846711
FAM19A5	0	0	5.48202e-10	1.04061e-257	0.935755	0.496776	0.0603247	0.00211347	0.0320886	0.00342375	0.0015974	0.846711
NXF3	0	0	5.07793e-10	7.72825e-258	0.931462	0.490302	0.0607364	0.00205176	0.0321063	-0.00537903	0.00250993	0.846711
IFNL4	0	0	5.33743e-10	8.60893e-258	0.932073	0.487902	0.0620031	0.00216339	0.0321361	0.0074365	0.00347057	0.846711
KLK8	0	0	5.11559e-10	7.27382e-258	0.929665	0.487024	0.0619606	0.00213036	0.0321421	0.00615507	0.00287263	0.846711
POMC	0	0	5.26809e-10	1.02221e-257	0.922337	0.498232	0.0608001	0.00242279	0.0323334	-0.00116766	0.000545563	0.846711
SAC3D1	0	0	5.03551e-10	8.97269e-258	0.927687	0.49652	0.0605871	0.00193424	0.0323398	0.00161461	0.000754418	0.846711
UNC45A	0	0	5.22971e-10	6.69026e-258	0.929205	0.487602	0.0609835	0.00209961	0.032358	-0.00104927	0.000490319	0.846711
MIS12	0	0	5.33208e-10	7.8561e-258	0.932122	0.498003	0.0601577	0.00204106	0.0323699	-0.00447495	0.00209126	0.846711
BLVRB	0	0	5.0369e-10	7.55007e-258	0.93372	0.49547	0.0596903	0.00191987	0.0323738	0.00136516	0.00063799	0.846711
C2orf66	0	0	5.03625e-10	5.33786e-258	0.929473	0.494882	0.0612472	0.00207768	0.0324445	0.00942987	0.00440872	0.846711
AJAP1	0	0	5.01497e-10	6.82845e-258	0.927428	0.494903	0.0612656	0.00222017	0.0324803	0.00379496	0.00177461	0.846711
RHBDL3	0	0	5.00775e-10	1.16158e-257	0.929006	0.497093	0.0615558	0.00202562	0.0325061	-0.00282999	0.00132357	0.846711
2004-03-01	0	0	5.19558e-10	9.14917e-258	0.928999	0.497814	0.0611659	0.00202788	0.0325583	-0.00386529	0.00180831	0.846711
FLII	0	0	5.3679e-10	1.28426e-257	0.92038	0.4922	0.0617998	0.00212021	0.0325932	0.00101745	0.000476094	0.846711
CNNM3	0	0	5.54356e-10	8.23993e-258	0.928916	0.495653	0.0612438	0.0021117	0.0326255	0.00195056	0.000912892	0.846711
KCNQ5	0	0	5.34073e-10	7.96063e-258	0.926291	0.493816	0.0604422	0.00207176	0.0327521	0.00198569	0.000930007	0.848809
EPOP	0	0	5.02175e-10	9.28497e-258	0.931327	0.498389	0.0605245	0.00214793	0.032806	0.00310966	0.00145688	0.849022
RIN1	0	0	5.31215e-10	8.50599e-258	0.930924	0.502159	0.0603555	0.00207515	0.0328615	-0.00121243	0.000568204	0.849274
ACTR1B	0	0	5.57108e-10	9.66105e-258	0.924704	0.497083	0.06065	0.00217367	0.0329507	-0.00207951	0.000975059	0.850395
UHMK1	0	0	5.38135e-10	1.27292e-257	0.925695	0.495675	0.0604343	0.00218651	0.0330171	0.0017303	0.000811624	0.850924
VGLL1	0	0	5.43243e-10	5.98306e-258	0.926297	0.494997	0.0621038	0.00203689	0.0331196	0.00983883	0.00461776	0.852381
FOXE1	0	0	5.5611e-10	6.02188e-258	0.931218	0.493076	0.0614519	0.00213701	0.0332277	0.00238271	0.00111899	0.853979
CYP2S1	0	0	5.3105e-10	8.55136e-258	0.914988	0.497137	0.0604082	0.0020442	0.0333755	0.00200396	0.000941904	0.856122
CLPSL1	0	0	5.09556e-10	6.88459e-258	0.922538	0.497782	0.060599	0.00204637	0.0334033	0.00431289	0.00202748	0.856122
PATE3	0	0	5.26496e-10	7.30089e-258	0.923899	0.495905	0.0612196	0.00216424	0.0335232	-0.00415917	0.00195654	0.858008
PRR23B	0	0	5.11419e-10	6.9966e-258	0.929476	0.493	0.061459	0.00221972	0.0336459	0.00666953	0.00313962	0.859349
SLC4A1AP	0	0	5.49958e-10	9.15053e-258	0.925893	0.500294	0.0619127	0.00211182	0.0336682	0.00206951	0.000974325	0.859349
ZNF74	0	0	4.92125e-10	5.96582e-258	0.921896	0.496729	0.0605113	0.00211976	0.0338974	0.00154775	0.000729621	0.860146
OR56A1	0	0	5.13061e-10	7.19679e-258	0.931171	0.493097	0.0620138	0.00212501	0.0339075	0.0016559	0.000780648	0.860146
SAMM50	0	0	5.05172e-10	1.00132e-257	0.92397	0.487153	0.062559	0.00216881	0.0339144	0.00233344	0.00110011	0.860146
CRNN	0	0	5.50376e-10	8.04487e-258	0.925904	0.49225	0.0615189	0.00207566	0.0339286	0.00317055	0.00149488	0.860146
SNCAIP	0	0	5.53703e-10	9.92377e-258	0.922265	0.501283	0.0608798	0.00211541	0.033945	-0.0011454	0.000540094	0.860146
HOXD13	0	0	5.03736e-10	1.07932e-257	0.917594	0.496829	0.0605767	0.00209142	0.0339775	-0.00279621	0.00131874	0.860146
ACSM2B	0	0	5.44361e-10	9.68306e-258	0.92478	0.502219	0.0599235	0.0019841	0.0341468	0.0010098	0.000476692	0.863255
SOCS6	0	0	5.042e-10	8.12681e-258	0.92524	0.487704	0.0610688	0.00212189	0.0343524	0.0033502	0.00158332	0.866628
INTS2	0	0	5.03685e-10	8.6712e-258	0.933487	0.484453	0.059983	0.00209357	0.0344002	-0.00203615	0.000962551	0.866628
STIM2	0	0	5.24117e-10	7.33479e-258	0.924271	0.501747	0.0617463	0.0020552	0.0344204	-0.0022241	0.00105152	0.866628
SLITRK4	0	0	5.38646e-10	5.51598e-258	0.920666	0.49762	0.0591499	0.00228965	0.0345903	0.00597036	0.00282535	0.868557
TBC1D30	0	0	5.38285e-10	7.93278e-258	0.938318	0.498856	0.060682	0.00220602	0.0346325	-0.00107241	0.000507614	0.868557
C19orf71	0	0	5.17909e-10	6.80295e-258	0.931477	0.492084	0.0613644	0.00221653	0.0346374	-0.000852111	0.000403348	0.868557
GGT1	0	0	5.55035e-10	8.18439e-258	0.931356	0.495759	0.0609654	0.00212411	0.0347292	0.00156339	0.000740407	0.869143
LRRC4C	0	0	5.2769e-10	7.31711e-258	0.928184	0.492291	0.0607957	0.00209822	0.0347545	0.00162674	0.000770519	0.869143
SYNGAP1	0	0	5.29489e-10	6.78521e-258	0.930537	0.484553	0.0602264	0.00202888	0.0348167	-0.00300436	0.00142353	0.869413
STIL	0	0	4.94263e-10	7.14645e-258	0.937426	0.497548	0.0603814	0.00206491	0.0349838	-0.00131305	0.000622722	0.869413
SLC28A2	0	0	5.12433e-10	6.21032e-258	0.92579	0.497443	0.0588693	0.00215543	0.0349847	-0.00165046	0.000782747	0.869413
ST6GALNAC2	0	0	5.34916e-10	1.13002e-257	0.926804	0.493284	0.0616052	0.00206803	0.0350366	0.00156785	0.000743779	0.869413
SLIRP	0	0	5.44517e-10	6.94873e-258	0.930491	0.496257	0.0600238	0.00204913	0.0350861	-0.00308109	0.00146204	0.869413
KIAA1468	0	0	5.37839e-10	1.03308e-257	0.930354	0.492188	0.0601415	0.00213901	0.0351666	-0.00194871	0.000925113	0.869413
PPP4R3A	0	0	5.38006e-10	6.20158e-258	0.923871	0.496337	0.0612632	0.00209372	0.0352249	-0.00308892	0.00146687	0.869413
C17orf98	0	0	5.43118e-10	7.6448e-258	0.936731	0.494898	0.0609357	0.00208083	0.0352285	0.00478709	0.00227335	0.869413
UTP18	0	0	5.27882e-10	7.04348e-258	0.92194	0.499235	0.059037	0.00195604	0.0352762	-0.00173162	0.000822549	0.869413
SHC2	0	0	5.02849e-10	7.6086e-258	0.932509	0.495849	0.0611059	0.00202407	0.0354169	-0.00151941	0.000722299	0.869413
SH2B3	0	0	5.20809e-10	1.08315e-257	0.932765	0.491966	0.0616697	0.00207016	0.0354925	0.00105177	0.000500199	0.869413
CST7	0	0	5.26626e-10	1.11376e-257	0.93176	0.498586	0.0605878	0.00208745	0.0354993	0.00602348	0.00286473	0.869413
RRS1	0	0	5.58433e-10	6.58836e-258	0.934226	0.484116	0.0621453	0.00218663	0.0355231	0.0022658	0.00107774	0.869413
HLA-C	0	0	5.28089e-10	9.8445e-258	0.928986	0.491082	0.0609615	0.00193303	0.0355379	-0.000886353	0.000421632	0.869413
NR1I2	0	0	5.45004e-10	6.26896e-258	0.933539	0.499318	0.0624238	0.00209949	0.0355646	0.00234711	0.00111666	0.869413
ADGRF2	0	0	5.24434e-10	8.29686e-258	0.9215	0.495673	0.0610856	0.00195444	0.0356017	-0.00129379	0.00061566	0.869413
DQX1	0	0	5.42512e-10	6.75596e-258	0.929873	0.493318	0.0608776	0.00221211	0.0356046	0.00155873	0.000741745	0.869413
MYO10	0	0	5.18525e-10	7.34487e-258	0.925276	0.492819	0.0617186	0.00198526	0.0356086	0.0010165	0.000483727	0.869413
SUPT5H	0	0	5.18187e-10	7.25298e-258	0.922528	0.494662	0.0604289	0.00215993	0.0357534	0.00225308	0.00107303	0.871801
TMC7	0	0	5.16526e-10	9.31228e-258	0.935039	0.492876	0.0612453	0.00196034	0.0358771	-0.000869258	0.00041426	0.872285
UTP20	0	0	5.03942e-10	9.1967e-258	0.932656	0.497263	0.0621763	0.00197573	0.0359036	0.000844872	0.000402696	0.872285
ALDH5A1	0	0	5.55096e-10	8.54527e-258	0.930284	0.49288	0.0610423	0.00196652	0.0360022	-0.00106182	0.000506369	0.872285
KIF6	0	0	5.24098e-10	9.17547e-258	0.92805	0.490499	0.0601287	0.00188807	0.0360078	0.00116522	0.000555697	0.872285
SHCBP1	0	0	5.41347e-10	1.02724e-257	0.928761	0.494262	0.0613598	0.00233799	0.0360382	-0.00193656	0.000923704	0.872285
ZNF25	0	0	5.15285e-10	7.09232e-258	0.91885	0.484056	0.0610483	0.00212675	0.0360775	-0.00344014	0.00164123	0.872285
PLEKHO1	0	0	5.08404e-10	7.33134e-258	0.924816	0.490832	0.0607109	0.00203655	0.036254	0.0014184	0.000677335	0.872285
HLX	0	0	5.32953e-10	6.94424e-258	0.933536	0.493858	0.0607399	0.00198393	0.036271	-0.0029229	0.00139591	0.872285
NR2E3	0	0	5.5464e-10	8.55859e-258	0.923307	0.487259	0.0614657	0.00194357	0.0363033	-0.00397201	0.00189728	0.872285
LY6G5C	0	0	5.23951e-10	7.18519e-258	0.929593	0.494067	0.0607603	0.00204044	0.0363729	0.0122795	0.00586761	0.872285
LETMD1	0	0	5.19059e-10	1.25883e-257	0.926524	0.494027	0.0615055	0.00202362	0.0364397	-0.00172204	0.000823154	0.872285
ANKH	0	0	5.28936e-10	7.76414e-258	0.920134	0.497857	0.0605727	0.00202889	0.0364466	0.00219777	0.0010506	0.872285
RRAGD	0	0	5.16273e-10	1.03893e-257	0.928757	0.499787	0.0599041	0.00209485	0.0365304	-0.0034965	0.00167217	0.872285
PIGR	0	0	5.30924e-10	8.35533e-258	0.928137	0.493553	0.0603446	0.00214928	0.0365529	0.00180224	0.000862008	0.872285
ATP5S	0	0	5.46565e-10	8.32682e-258	0.92706	0.494101	0.0620654	0.00200927	0.0365677	-0.00490877	0.00234805	0.872285
NRG1	0	0	5.14736e-10	1.02006e-257	0.931051	0.492197	0.0600391	0.00226379	0.0365959	0.00132489	0.000633837	0.872285
TUBB1	0	0	4.95687e-10	9.87645e-258	0.92213	0.488298	0.0610792	0.0020861	0.0366182	-0.00118289	0.000565973	0.872285
SAMD3	0	0	5.37314e-10	6.14897e-258	0.937049	0.489644	0.060303	0.00229141	0.0366657	0.0014886	0.000712423	0.872285
CHRNA3	0	0	5.24547e-10	1.00259e-257	0.927214	0.487377	0.0618745	0.00208819	0.0366664	0.00270059	0.00129247	0.872285
PDCD11	0	0	5.27647e-10	8.42879e-258	0.92925	0.495472	0.0607945	0.00210504	0.0368201	0.000774631	0.000371032	0.873898
LGSN	0	0	5.15339e-10	6.37537e-258	0.925483	0.499381	0.0604367	0.00191386	0.0369744	0.0028995	0.00138993	0.873898
APOBEC3B	0	0	5.33579e-10	7.96463e-258	0.921964	0.491552	0.0622587	0.00204881	0.0370033	-0.00344485	0.00165161	0.873898
AXIN1	0	0	5.31076e-10	8.10325e-258	0.930025	0.497635	0.0607575	0.0020172	0.0370469	0.00129472	0.000620891	0.873898
FIBP	0	0	5.08749e-10	8.49228e-258	0.927919	0.488928	0.0609656	0.00207233	0.0370765	-0.00203709	0.000977051	0.873898
ADH1C	0	0	5.76605e-10	8.06352e-258	0.926213	0.493101	0.0618671	0.00209902	0.0371092	0.0037331	0.00179082	0.873898
DDX55	0	0	5.33175e-10	9.7863e-258	0.923631	0.49846	0.0626347	0.00204876	0.0372481	0.00179137	0.000859971	0.873898
PFKL	0	0	5.47442e-10	8.42869e-258	0.930047	0.490229	0.0628142	0.00202083	0.0372843	-0.00111374	0.00053477	0.873898
USP3	0	0	5.31493e-10	7.43566e-258	0.923756	0.492946	0.0614132	0.00204684	0.0373085	-0.00275057	0.00132087	0.873898
DNAH3	0	0	5.14427e-10	8.05677e-258	0.939691	0.49	0.0624099	0.00201487	0.037355	0.000456541	0.000219293	0.873898
ACADL	0	0	5.3841e-10	6.57227e-258	0.930585	0.497037	0.0610591	0.00217791	0.037487	-0.00115311	0.000554265	0.873898
LRRN2	0	0	5.11576e-10	8.72387e-258	0.934885	0.494328	0.0606473	0.00202594	0.0375131	-0.00189559	0.000911272	0.873898
LRBA	0	0	5.16847e-10	9.41849e-258	0.936761	0.494422	0.0597098	0.00199299	0.0375439	-0.000711443	0.00034207	0.873898
HS3ST1	0	0	5.1129e-10	7.2534e-258	0.929917	0.498686	0.0615066	0.0020327	0.0375753	-0.00434442	0.00208919	0.873898
JPT1	0	0	5.0566e-10	9.63269e-258	0.92817	0.495048	0.061035	0.00211868	0.0376243	0.00156813	0.000754292	0.873898
SLC26A3	0	0	5.19401e-10	7.72984e-258	0.925857	0.495071	0.0609879	0.00214821	0.0377643	0.00205744	0.00099038	0.873898
CCT5	0	0	5.12947e-10	1.15018e-257	0.925919	0.495887	0.0605046	0.0020546	0.0378229	-0.00236033	0.00113653	0.873898
BBX	0	0	5.2649e-10	7.12541e-258	0.930364	0.488568	0.0619952	0.00197871	0.0379732	-0.00120146	0.000578971	0.873898
COMP	0	0	5.11654e-10	1.09605e-257	0.921971	0.495052	0.0600642	0.00210975	0.0380181	-0.00215778	0.00104006	0.873898
MNS1	0	0	5.2136e-10	9.13538e-258	0.930892	0.494449	0.0613027	0.00204463	0.0380189	-0.00192532	0.000928011	0.873898
C19orf73	0	0	5.25452e-10	8.04696e-258	0.923204	0.49468	0.061853	0.00201919	0.0380476	0.00844271	0.00407003	0.873898
CHRNA2	0	0	5.19222e-10	6.87229e-258	0.930492	0.494448	0.0612885	0.00214119	0.0380545	0.00335673	0.00161826	0.873898
POLE2	0	0	5.37154e-10	8.21204e-258	0.933283	0.488489	0.0606854	0.00212793	0.0381633	0.00193662	0.000934157	0.873898
MAIP1	0	0	5.09207e-10	1.01293e-257	0.932541	0.492137	0.0597252	0.00212833	0.0382027	0.00369981	0.00178503	0.873898
EPHB4	0	0	5.58485e-10	8.11299e-258	0.932256	0.492229	0.0614634	0.00208212	0.0382185	0.00153681	0.000741517	0.873898
PPP1R16B	0	0	5.52495e-10	8.06831e-258	0.925817	0.495875	0.0614491	0.00194998	0.0382377	0.00172712	0.000833427	0.873898
TRIM11	0	0	5.24102e-10	8.39537e-258	0.923461	0.492312	0.0603175	0.00201817	0.0382636	-0.00318241	0.00153588	0.873898
PTGER1	0	0	5.2523e-10	9.08421e-258	0.926356	0.489275	0.0627023	0.00192327	0.0383939	0.00160708	0.000776126	0.873898
TRPM5	0	0	5.40585e-10	1.24907e-257	0.924899	0.500228	0.0606563	0.00205574	0.0384129	0.000956575	0.000462015	0.873898
AREL1	0	0	5.44792e-10	7.35334e-258	0.928488	0.484806	0.0609229	0.0020972	0.0384472	0.00118456	0.00057223	0.873898
INHBC	0	0	5.27589e-10	6.26571e-258	0.930922	0.496921	0.0606128	0.00215776	0.038475	0.00303103	0.00146442	0.873898
TM2D1	0	0	5.60904e-10	6.80923e-258	0.934372	0.490727	0.0615781	0.00207703	0.0384976	0.00373528	0.00180489	0.873898
FSTL1	0	0	5.272e-10	8.4459e-258	0.93232	0.496387	0.0607373	0.00204898	0.0386795	0.00301071	0.00145614	0.873898
CLMN	0	0	5.20678e-10	9.88558e-258	0.92524	0.491048	0.0625169	0.00194576	0.0387462	0.000922684	0.000446411	0.873898
USP51	0	0	5.14425e-10	6.70098e-258	0.917257	0.497733	0.0604951	0.00213014	0.0388212	0.00549399	0.00265912	0.873898
TESK2	0	0	5.49806e-10	7.84301e-258	0.926237	0.492041	0.0614652	0.00202746	0.0388764	-0.00186212	0.000901527	0.873898
ANXA10	0	0	4.98416e-10	8.15011e-258	0.929849	0.490256	0.0606395	0.00217321	0.0388819	-0.00163023	0.000789285	0.873898
TLR10	0	0	5.34444e-10	5.26311e-258	0.930496	0.493733	0.0628998	0.00224259	0.0388844	0.00131359	0.000635989	0.873898
TMEM181	0	0	5.20008e-10	7.94736e-258	0.927379	0.496559	0.060344	0.00207228	0.0388876	-0.000938796	0.000454536	0.873898
CSGALNACT1	0	0	5.79019e-10	7.84189e-258	0.922224	0.502087	0.061497	0.00193512	0.0389153	-0.00104008	0.000503648	0.873898
PGM2	0	0	5.04045e-10	9.21519e-258	0.929885	0.49316	0.0613299	0.00210483	0.0389987	-0.0014407	0.000697938	0.873898
KRT18	0	0	5.42037e-10	8.68117e-258	0.930925	0.494794	0.0613542	0.00185274	0.039069	0.00267031	0.00129408	0.873898
FUBP3	0	0	5.27812e-10	7.68649e-258	0.929618	0.495394	0.0613646	0.00201901	0.0391161	0.00252575	0.00122432	0.873898
SH3BGR	0	0	5.30201e-10	9.00196e-258	0.934493	0.493354	0.0609573	0.0020722	0.0391401	0.0133223	0.00645857	0.873898
PLEKHM1	0	0	5.43317e-10	9.25247e-258	0.924625	0.499104	0.0608151	0.00205798	0.0391524	-0.00158091	0.000766467	0.873898
CYP2B6	0	0	5.81726e-10	8.67336e-258	0.928076	0.494391	0.060372	0.00188657	0.039161	-0.00118507	0.000574577	0.873898
HMGCS1	0	0	5.15421e-10	6.84097e-258	0.921706	0.493166	0.0593498	0.00211889	0.0392009	-0.00451371	0.0021889	0.873898
DSC3	0	0	5.0886e-10	6.62575e-258	0.928908	0.496487	0.0603467	0.00228574	0.0392011	0.000974007	0.00047234	0.873898
METTL3	0	0	5.14439e-10	1.04298e-257	0.93085	0.497016	0.0611143	0.00224403	0.0392025	-0.0021243	0.00103018	0.873898
CDIPT	0	0	5.36119e-10	8.74998e-258	0.924578	0.494429	0.0600822	0.00215729	0.0392571	0.00343867	0.00166804	0.873898
SRCAP	0	0	5.18737e-10	9.88252e-258	0.924934	0.489388	0.0607472	0.00216844	0.0392612	0.00110457	0.000535822	0.873898
PLA2G10	0	0	5.47691e-10	6.90478e-258	0.92596	0.493631	0.061041	0.00204296	0.0394326	0.0135403	0.00657405	0.873898
FAM114A2	0	0	5.13078e-10	1.38524e-257	0.927811	0.490981	0.0610223	0.00223681	0.0394901	-0.00240967	0.00117028	0.873898
NCF2	0	0	5.24973e-10	9.01585e-258	0.930961	0.494969	0.0617314	0.00233116	0.0394975	-0.000911169	0.000442533	0.873898
DAZAP1	0	0	5.55204e-10	7.21551e-258	0.92523	0.493355	0.0609781	0.00210646	0.039546	0.00608963	0.00295832	0.873898
TMEM145	0	0	5.38189e-10	7.3464e-258	0.930156	0.490394	0.0611227	0.00222692	0.0395671	0.00169897	0.00082544	0.873898
TNFRSF21	0	0	5.3238e-10	5.94731e-258	0.929351	0.498078	0.0619577	0.00218594	0.0395914	0.00171411	0.000832899	0.873898
BCCIP	0	0	5.61702e-10	8.70966e-258	0.9347	0.492409	0.0613895	0.00214873	0.0395923	0.0037241	0.00180958	0.873898
SYN1	0	0	5.02341e-10	6.73408e-258	0.931417	0.490086	0.061177	0.00194155	0.039715	-0.00665925	0.0032378	0.873898
PRPF38A	0	0	5.31013e-10	5.99937e-258	0.926195	0.488178	0.0613812	0.00200906	0.0397339	-0.00374529	0.00182118	0.873898
LRP2BP	0	0	5.04053e-10	1.06167e-257	0.926436	0.494635	0.0604959	0.00211641	0.0397844	0.00171894	0.000836062	0.873898
DNAJC5B	0	0	5.22554e-10	7.24375e-258	0.929275	0.496645	0.0596439	0.00217233	0.0398104	0.00235144	0.00114385	0.873898
STK32B	0	0	5.12274e-10	6.64733e-258	0.926703	0.49338	0.0605052	0.00212095	0.0398715	0.0020731	0.00100876	0.873898
2008-03-01	0	0	5.26295e-10	9.04888e-258	0.925511	0.494536	0.0611758	0.00208482	0.0398751	-0.00226369	0.00110152	0.873898
CENPW	0	0	5.28541e-10	7.67481e-258	0.931292	0.492816	0.0602847	0.00211737	0.0398873	-0.00230995	0.0011241	0.873898
ZNF26	0	0	5.08064e-10	7.04237e-258	0.930922	0.491051	0.0616493	0.00207297	0.0399343	-0.00495796	0.00241328	0.873898
TBC1D1	0	0	5.24458e-10	6.64323e-258	0.927331	0.491341	0.0601288	0.002025	0.0399823	-0.00145075	0.000706321	0.873898
PPM1K	0	0	5.22763e-10	8.97222e-258	0.932669	0.493588	0.05995	0.00197099	0.0400261	-0.00376211	0.00183205	0.873898
GOLGA7	0	0	5.00921e-10	8.28575e-258	0.929153	0.496232	0.0616444	0.00208648	0.040051	0.00774794	0.00377352	0.873898
MT3	0	0	5.49499e-10	6.74322e-258	0.931435	0.496026	0.0594365	0.00204153	0.0400785	0.00287254	0.00139922	0.873898
TMEM56-RWDD3	0	0	4.97536e-10	8.41482e-258	0.923145	0.494876	0.0608007	0.00211202	0.040124	-0.0260039	0.0126695	0.873898
HMGCS2	0	0	5.0329e-10	9.89183e-258	0.931408	0.493737	0.0614319	0.00211598	0.0401259	0.00203478	0.000991379	0.873898
ANAPC2	0	0	5.43943e-10	8.74003e-258	0.925929	0.49237	0.061325	0.00188834	0.0402348	0.00141846	0.000691477	0.873898
MAPK14	0	0	5.09297e-10	7.44332e-258	0.921763	0.493864	0.0622761	0.00198866	0.0402917	-0.00418946	0.00204288	0.873898
ZNF664	0	0	5.02125e-10	8.99722e-258	0.927523	0.491884	0.0618846	0.00227721	0.0403022	0.00221042	0.00107791	0.873898
RAET1E	0	0	5.1449e-10	1.22656e-257	0.935365	0.494767	0.0607684	0.00209356	0.0403135	0.00812677	0.00396323	0.873898
CAMP	0	0	5.25334e-10	1.433e-257	0.931551	0.500556	0.0603239	0.00217649	0.0404223	-0.00253717	0.00123799	0.875234
GFM2	0	0	5.11669e-10	6.8081e-258	0.934977	0.490975	0.0617518	0.00196684	0.0405424	0.00154373	0.000753701	0.876812
S100PBP	0	0	5.13684e-10	6.63794e-258	0.930575	0.492235	0.0615992	0.00195682	0.040652	0.0030088	0.0014698	0.878158
ZC3H7B	0	0	5.53342e-10	8.04846e-258	0.923322	0.487763	0.0619394	0.00201749	0.0408508	-0.0013117	0.0006414	0.881018
CDYL2	0	0	5.32646e-10	8.50675e-258	0.924242	0.493465	0.0619457	0.00203612	0.0408793	0.00126788	0.000620059	0.881018
RORC	0	0	5.11951e-10	1.25232e-257	0.924494	0.493678	0.0594678	0.00201819	0.0409794	-0.00108692	0.000531824	0.882151
FAM207A	0	0	5.4298e-10	9.36815e-258	0.931185	0.494597	0.0605773	0.00206639	0.0411004	0.00226945	0.0011111	0.883729
CCK	0	0	5.38606e-10	8.68607e-258	0.927522	0.492421	0.0613205	0.002137	0.0412185	0.00549544	0.00269207	0.884267
TRAF7	0	0	5.01281e-10	9.51652e-258	0.928979	0.49667	0.0622117	0.00207446	0.0413571	-0.00318534	0.00156148	0.884267
SLC22A31	0	0	5.20383e-10	8.06524e-258	0.927543	0.501265	0.061091	0.00216531	0.0414514	0.00253144	0.00124151	0.884267
PLBD1	0	0	5.03985e-10	7.85431e-258	0.937658	0.498319	0.060804	0.00200899	0.0414657	-0.00110196	0.00054048	0.884267
BBS2	0	0	5.21643e-10	7.09734e-258	0.934578	0.490835	0.0616975	0.00212811	0.0414811	-0.00129406	0.000634743	0.884267
PDCD1LG2	0	0	5.19353e-10	7.1694e-258	0.929209	0.499555	0.0621346	0.00197917	0.0415533	-0.00373843	0.00183437	0.884267
GNG7	0	0	5.02761e-10	7.2155e-258	0.929848	0.491115	0.060629	0.00208792	0.0415847	0.00914735	0.00448912	0.884267
SIPA1L2	0	0	5.17674e-10	1.22382e-257	0.931487	0.502839	0.0602265	0.00204686	0.041597	-0.000764775	0.000375341	0.884267
HYAL3	0	0	5.16553e-10	6.45643e-258	0.935747	0.490537	0.0624968	0.00205712	0.0418422	0.00160135	0.000786866	0.884267
CERS3	0	0	5.03918e-10	8.2097e-258	0.924027	0.494916	0.0609484	0.0021443	0.041885	0.00341745	0.0016796	0.884267
SPG20	0	0	5.43613e-10	1.00104e-257	0.92966	0.493238	0.0607765	0.00212433	0.0418972	0.00226752	0.0011145	0.884267
TAS2R7	0	0	5.28925e-10	6.2473e-258	0.930081	0.494713	0.0596035	0.0021856	0.0419026	0.00237275	0.00116625	0.884267
NR1H2	0	0	5.26606e-10	8.05923e-258	0.928986	0.500304	0.0599598	0.00202393	0.0419736	-0.0028552	0.00140387	0.884267
SH3BGRL3	0	0	5.15983e-10	9.40492e-258	0.921262	0.490813	0.0616319	0.00195894	0.0419967	-0.00572889	0.00281716	0.884267
UGT2B10	0	0	5.6106e-10	7.46002e-258	0.928026	0.492659	0.0613516	0.002163	0.0420508	-0.00178243	0.000876735	0.884267
FAM47C	0	0	5.04608e-10	7.8615e-258	0.928824	0.500086	0.0627098	0.00202149	0.0420702	-0.00345675	0.00170045	0.884267
LRCH3	0	0	4.92222e-10	7.53323e-258	0.922297	0.494053	0.0605358	0.00212164	0.0420896	-0.00121783	0.000599133	0.884267
RETREG3	0	0	5.3208e-10	8.04748e-258	0.924082	0.494229	0.0619563	0.00197549	0.0422061	0.00305966	0.00150611	0.884267
OR8K3	0	0	4.85041e-10	8.17195e-258	0.931599	0.497418	0.0618828	0.00213676	0.0422145	0.00242628	0.00119438	0.884267
ARHGAP42	0	0	5.3885e-10	9.39328e-258	0.930475	0.496271	0.060589	0.00204469	0.0422223	0.00276042	0.00135892	0.884267
PTBP2	0	0	5.13494e-10	7.49475e-258	0.932161	0.494172	0.0598735	0.00210107	0.0422261	0.00560784	0.00276071	0.884267
SEMG2	0	0	5.37083e-10	8.60794e-258	0.930186	0.49555	0.0609988	0.00207801	0.0423055	0.00152418	0.000750635	0.884267
EMSY	0	0	5.39351e-10	6.55357e-258	0.933272	0.498071	0.0607479	0.00200273	0.0423426	0.0018763	0.000924214	0.884267
AKAP8	0	0	5.57213e-10	5.45655e-258	0.928967	0.49534	0.0613308	0.00201432	0.0424048	0.000673274	0.000331737	0.884267
IRS2	0	0	5.09999e-10	1.10041e-257	0.927203	0.492901	0.0603398	0.00203775	0.0424106	-0.00173885	0.000856794	0.884267
CLEC18B	0	0	5.60101e-10	6.3857e-258	0.926901	0.494062	0.0617326	0.00205749	0.0424635	-0.00223864	0.00110334	0.884267
MEIG1	0	0	5.33673e-10	7.00613e-258	0.925399	0.493486	0.0606706	0.00218222	0.042532	0.00451806	0.00222752	0.884267
KIAA0907	0	0	5.4007e-10	1.19857e-257	0.928287	0.494127	0.0608463	0.00205912	0.0425711	0.00299594	0.00147735	0.884267
KIAA0895	0	0	5.37417e-10	9.3134e-258	0.927617	0.496678	0.0609849	0.00206463	0.0426633	0.00363017	0.0017909	0.884267
SLC30A5	0	0	5.22498e-10	7.50543e-258	0.927809	0.497982	0.0622535	0.00205085	0.0427583	-0.00208146	0.00102733	0.884267
ISG20	0	0	5.43646e-10	9.82984e-258	0.935933	0.492884	0.0608365	0.00209438	0.0427668	0.00379722	0.00187425	0.884267
MAP3K11	0	0	5.56111e-10	6.73822e-258	0.922987	0.497081	0.061072	0.00202959	0.0427766	-0.00211839	0.00104565	0.884267
ZNF696	0	0	5.20143e-10	9.59619e-258	0.921019	0.49149	0.0612153	0.00204221	0.0428056	-0.00308592	0.00152345	0.884267
COL9A2	0	0	5.23471e-10	9.8767e-258	0.929431	0.498076	0.0613189	0.00203131	0.0429092	0.00122454	0.000604829	0.884267
MBD5	0	0	5.07496e-10	7.17971e-258	0.931309	0.49805	0.0596289	0.00214506	0.0429145	-0.00178274	0.00088056	0.884267
CASP5	0	0	5.22117e-10	1.10568e-257	0.928001	0.493573	0.0630477	0.00210753	0.0429182	-0.00180193	0.000890053	0.884267
NUP37	0	0	5.28257e-10	5.93387e-258	0.924291	0.49652	0.0603753	0.00211168	0.0429193	0.00372266	0.0018388	0.884267
PSME4	0	0	5.21776e-10	5.96439e-258	0.930424	0.492357	0.0600997	0.00216895	0.0429362	-0.00143673	0.000709724	0.884267
CCDC167	0	0	5.17839e-10	6.95782e-258	0.927107	0.496601	0.0598406	0.00210161	0.0430098	-0.00409276	0.00202248	0.884675
FOXO6	0	0	5.40188e-10	7.71246e-258	0.92441	0.492345	0.0601123	0.00215767	0.0430821	0.00135485	0.000669745	0.884675
SLC25A19	0	0	5.24551e-10	8.26079e-258	0.931601	0.492421	0.0602128	0.00201954	0.0431826	-0.00447752	0.00221445	0.884675
IP6K2	0	0	5.09662e-10	6.77723e-258	0.931439	0.493306	0.0603779	0.00217681	0.0432019	0.00138866	0.000686853	0.884675
AMDHD2	0	0	5.16432e-10	8.68708e-258	0.922824	0.493763	0.0596953	0.00229423	0.0432427	-0.00163695	0.000809822	0.884675
SGSH	0	0	5.26284e-10	8.5562e-258	0.933711	0.496227	0.0605574	0.00205757	0.0432514	-0.00114881	0.000568354	0.884675
RPL6	0	0	5.08684e-10	6.22721e-258	0.930964	0.492509	0.0623608	0.00210545	0.0432897	-0.00357625	0.00176961	0.884675
TMEM97	0	0	5.20934e-10	1.02888e-257	0.928094	0.493382	0.0604249	0.00211033	0.0435251	0.00501719	0.00248542	0.885249
GAPT	0	0	5.16598e-10	7.92402e-258	0.92995	0.487724	0.0606528	0.00207586	0.0435296	-0.00518594	0.00256907	0.885249
EMILIN1	0	0	5.0852e-10	8.73079e-258	0.924377	0.498167	0.0600717	0.00211602	0.0436043	-0.00178873	0.000886435	0.885249
ARMC7	0	0	5.40537e-10	6.43948e-258	0.927452	0.497321	0.0613345	0.00208325	0.043668	0.00428583	0.00212456	0.885249
RHOU	0	0	5.45098e-10	8.19931e-258	0.926156	0.488634	0.061962	0.00208252	0.043682	0.00284967	0.00141272	0.885249
CEACAM1	0	0	5.45724e-10	1.05216e-257	0.922579	0.49655	0.0614942	0.00205927	0.0437047	-0.00352969	0.00175003	0.885249
MUC3A	0	0	5.25518e-10	7.51478e-258	0.926202	0.49093	0.0613349	0.00201689	0.043898	0.00249971	0.0012405	0.885249
ZFHX3	0	0	5.73493e-10	6.78199e-258	0.936258	0.495951	0.0623668	0.00208809	0.0439236	0.00100424	0.000498425	0.885249
OR5AK2	0	0	4.86258e-10	1.21255e-257	0.929558	0.49858	0.0602268	0.00200808	0.0439456	-0.00491438	0.00243935	0.885249
SLC35D2	0	0	5.23326e-10	7.73925e-258	0.929272	0.497596	0.0603266	0.0021001	0.0439498	0.00253955	0.00126058	0.885249
NXT2	0	0	5.04992e-10	6.42692e-258	0.930207	0.490178	0.0593679	0.00206863	0.0439615	-0.0100627	0.00499521	0.885249
SPATS2	0	0	5.49265e-10	8.3586e-258	0.925537	0.491806	0.0622559	0.0021843	0.0439865	-0.00138799	0.000689088	0.885249
CHAMP1	0	0	5.18484e-10	8.4678e-258	0.927515	0.4939	0.0603683	0.00209416	0.0440009	0.00213904	0.00106203	0.885249
SLCO1A2	0	0	5.34092e-10	9.03262e-258	0.928573	0.493259	0.0613591	0.00221717	0.0440436	0.00197295	0.000979767	0.885249
EIF4E	0	0	5.39984e-10	8.76607e-258	0.921507	0.489368	0.0615414	0.00206918	0.0440458	-0.0070939	0.00352287	0.885249
PROKR2	0	0	5.22631e-10	8.38046e-258	0.927123	0.489995	0.0615504	0.00198522	0.0440812	-0.00121879	0.00060536	0.885249
NHP2	0	0	5.21133e-10	7.81555e-258	0.927471	0.495069	0.0601591	0.00214737	0.044318	0.00206338	0.001026	0.887964
EWSR1	0	0	5.30192e-10	7.73524e-258	0.929743	0.490329	0.0603336	0.0020337	0.0443553	-0.00326528	0.00162392	0.887964
KRTAP20-3	0	0	4.98788e-10	9.98561e-258	0.927926	0.491632	0.0603181	0.00214621	0.0443599	0.0348983	0.0173563	0.887964
FBRS	0	0	5.42478e-10	1.00137e-257	0.932653	0.496101	0.0602215	0.00202035	0.0444462	0.00197576	0.000983028	0.888733
SMAD5	0	0	5.11087e-10	1.18816e-257	0.928888	0.490284	0.0610975	0.00209844	0.044543	0.00456556	0.0022726	0.88971
PIK3R1	0	0	5.23701e-10	7.3667e-258	0.928481	0.49099	0.0610757	0.0020595	0.0446153	-0.00300534	0.00149647	0.88983
RD3L	0	0	4.8402e-10	7.333e-258	0.939712	0.497444	0.0601044	0.00200865	0.0446449	-0.00432329	0.00215303	0.88983
TTLL6	0	0	5.13834e-10	1.04221e-257	0.935246	0.495872	0.0604965	0.00210936	0.0448507	-0.00119142	0.000593906	0.891089
SPATC1	0	0	5.10862e-10	1.04216e-257	0.927952	0.491519	0.0614461	0.00194482	0.0448948	0.00120631	0.000601453	0.891089
OR14J1	0	0	5.3284e-10	9.63615e-258	0.929827	0.491911	0.0610507	0.00200052	0.0450707	-0.00384228	0.0019173	0.891089
EDC3	0	0	5.15943e-10	1.06715e-257	0.929414	0.494608	0.0611642	0.00222192	0.0450916	-0.00229536	0.00114549	0.891089
PDCD7	0	0	5.47782e-10	7.12678e-258	0.921438	0.496334	0.0602601	0.00197305	0.0451564	-0.00182323	0.000910151	0.891089
ZNF266	0	0	5.36383e-10	1.109e-257	0.924224	0.490816	0.0619665	0.00198065	0.045162	0.00212553	0.00106109	0.891089
ZC3H10	0	0	5.48793e-10	8.42641e-258	0.928153	0.49251	0.0620595	0.00208761	0.0451624	0.00428222	0.00213773	0.891089
TOMM7	0	0	5.34789e-10	6.22114e-258	0.923899	0.498158	0.0596961	0.00209401	0.0451752	0.00539717	0.00269449	0.891089
MTCH2	0	0	5.18981e-10	7.83707e-258	0.927124	0.490854	0.0595323	0.00200019	0.0452204	-0.00351084	0.00175313	0.891089
CD6	0	0	5.60743e-10	9.84275e-258	0.919386	0.496667	0.0613924	0.00210367	0.045329	0.00299708	0.00149734	0.891089
PROSER1	0	0	5.06338e-10	1.00476e-257	0.929406	0.493565	0.0617086	0.00207239	0.0454784	0.00181457	0.000907183	0.891089
ZMAT3	0	0	5.41896e-10	7.82418e-258	0.929028	0.497529	0.0614739	0.00208994	0.0455166	0.00372235	0.0018613	0.891089
CASP8	0	0	5.12656e-10	8.37137e-258	0.930441	0.492674	0.0598778	0.00220717	0.0455848	-0.00345729	0.00172931	0.891089
TARBP2	0	0	4.93299e-10	8.31796e-258	0.935943	0.49739	0.0600086	0.0021158	0.0457603	0.00288307	0.00144326	0.891089
OR10A7	0	0	5.0393e-10	9.01221e-258	0.930066	0.491692	0.0612927	0.00220749	0.0457974	0.00473876	0.00237261	0.891089
NUP133	0	0	5.21877e-10	9.48741e-258	0.928723	0.493358	0.0611606	0.0021054	0.0458114	0.000905981	0.000453638	0.891089
SPRED3	0	0	5.16429e-10	6.7055e-258	0.929052	0.490741	0.0608914	0.00203206	0.0458145	0.00252749	0.00126557	0.891089
STARD10	0	0	5.28488e-10	9.33464e-258	0.925157	0.49313	0.0619575	0.0020737	0.045835	-0.0024465	0.00122513	0.891089
NRN1L	0	0	5.38358e-10	6.58159e-258	0.926217	0.495807	0.0597004	0.00211655	0.0458605	0.00420073	0.00210384	0.891089
BAAT	0	0	5.51595e-10	7.11744e-258	0.932215	0.493666	0.0605277	0.00208603	0.0460135	0.00271288	0.00135964	0.891089
SPINT4	0	0	5.053e-10	6.45371e-258	0.923615	0.493971	0.0606989	0.00216525	0.0460224	0.00978065	0.00490208	0.891089
S100P	0	0	5.08898e-10	1.24715e-257	0.932346	0.491734	0.0615064	0.00203776	0.0460508	-0.00949016	0.0047571	0.891089
PTPN11	0	0	5.20153e-10	1.26992e-257	0.924009	0.494143	0.060566	0.00196745	0.046098	0.00226084	0.00113353	0.891089
IL17B	0	0	5.18778e-10	9.61431e-258	0.941398	0.489187	0.0602525	0.00216349	0.046175	0.00311954	0.00156462	0.891089
PLA2G6	0	0	5.52467e-10	8.50777e-258	0.924364	0.488989	0.0611519	0.00207682	0.0461782	-0.00142298	0.000713708	0.891089
CFL2	0	0	5.17296e-10	8.10432e-258	0.923984	0.492376	0.0609669	0.00201834	0.0462265	-0.0109174	0.00547696	0.891089
MFSD4A	0	0	5.24778e-10	6.07009e-258	0.929509	0.491688	0.0602276	0.00207559	0.0463025	-0.0036946	0.00185412	0.891089
OVOL1	0	0	5.46701e-10	7.95419e-258	0.935601	0.495767	0.0602829	0.00205003	0.0463128	0.00189105	0.00094906	0.891089
CNTFR	0	0	5.1483e-10	7.2822e-258	0.931723	0.497658	0.0613157	0.00199308	0.0463146	-0.00346262	0.0017378	0.891089
SSTR4	0	0	5.08125e-10	8.48033e-258	0.925977	0.492269	0.0607578	0.00212331	0.0463357	-0.0015065	0.000756147	0.891089
ZNF597	0	0	5.13865e-10	1.11975e-257	0.931054	0.497947	0.0605819	0.00204672	0.046347	0.0022359	0.00112231	0.891089
C1orf168	0	0	5.36068e-10	7.95433e-258	0.925849	0.495441	0.0604959	0.00210643	0.0464006	0.0009058	0.000454776	0.891089
INPP5E	0	0	5.31022e-10	1.18807e-257	0.925824	0.495785	0.0596671	0.00212387	0.0464163	-0.00202986	0.00101921	0.891089
S100A13	0	0	5.16406e-10	7.22949e-258	0.928538	0.491049	0.0609858	0.00199038	0.0464686	0.00619738	0.0031125	0.891089
BAIAP2	0	0	4.76826e-10	6.29385e-258	0.92762	0.490383	0.0607593	0.00201463	0.046489	-0.00338791	0.00170166	0.891089
ACAP3	0	0	5.3709e-10	1.24833e-257	0.927232	0.495398	0.0618365	0.00203263	0.0464895	-0.00111167	0.000558363	0.891089
SIRT2	0	0	5.18308e-10	9.64949e-258	0.93145	0.49942	0.0606793	0.00235191	0.0465103	0.00100344	0.000504051	0.891089
KRTAP10-11	0	0	5.30213e-10	7.77481e-258	0.92009	0.501798	0.0616502	0.00201598	0.0465433	0.00462592	0.00232406	0.891089
PRIM2	0	0	5.39947e-10	5.74208e-258	0.928542	0.496362	0.0606207	0.00204149	0.0466036	-0.00468035	0.00235205	0.891089
TMEM126A	0	0	5.03933e-10	8.26449e-258	0.929675	0.489471	0.0606139	0.0021111	0.046645	-0.00115625	0.000581169	0.891089
LACTB	0	0	5.30542e-10	7.47468e-258	0.928847	0.492532	0.0624208	0.00197045	0.0467223	-0.00310864	0.00156305	0.891089
CNBD2	0	0	5.60607e-10	5.51146e-258	0.924062	0.489809	0.0608405	0.00205789	0.0467534	0.00145774	0.000733069	0.891089
MIER3	0	0	4.94858e-10	1.11596e-257	0.937419	0.493786	0.060572	0.00210099	0.0468007	0.003793	0.00190783	0.891089
MFSD4B	0	0	5.02459e-10	8.2169e-258	0.92958	0.495247	0.0607484	0.00206563	0.0468546	0.00267185	0.00134424	0.891089
KEL	0	0	5.60155e-10	7.84315e-258	0.931799	0.493557	0.060397	0.00215352	0.0469224	0.00194823	0.00098048	0.891089
GPR153	0	0	5.24992e-10	1.17788e-257	0.927853	0.494489	0.0618272	0.00196821	0.0469273	-0.00104455	0.000525701	0.891089
MMACHC	0	0	5.12871e-10	7.93243e-258	0.932547	0.498565	0.0598576	0.00217137	0.046984	0.00133599	0.000672549	0.891089
CRELD1	0	0	5.18707e-10	9.04542e-258	0.930405	0.490732	0.0601934	0.00208442	0.0471122	0.00219879	0.00110753	0.891089
NDUFB5	0	0	5.41665e-10	7.41485e-258	0.939887	0.490788	0.0629544	0.00207824	0.0471251	0.0020097	0.00101234	0.891089
PKMYT1	0	0	5.35638e-10	8.66948e-258	0.928521	0.496017	0.0621516	0.00211395	0.0471699	0.00274419	0.00138261	0.891089
CCR2	0	0	5.2684e-10	8.54084e-258	0.9342	0.500831	0.060851	0.00214029	0.0471874	-0.00303576	0.00152963	0.891089
SLC47A2	0	0	5.40629e-10	9.75637e-258	0.920564	0.492887	0.0616345	0.00194941	0.0472918	-0.00133971	0.000675362	0.891089
ARL6IP5	0	0	5.14388e-10	1.12339e-257	0.931454	0.495662	0.061665	0.0021172	0.0472961	0.00185047	0.000932859	0.891089
PCM1	0	0	5.30413e-10	9.0557e-258	0.927394	0.494446	0.0607978	0.00211209	0.0473013	-0.000625728	0.000315449	0.891089
TYW1B	0	0	5.58633e-10	8.09011e-258	0.920477	0.49732	0.0600964	0.00188051	0.0474349	-0.00205931	0.00103879	0.891654
PTK7	0	0	5.54009e-10	7.60253e-258	0.92361	0.495577	0.0609545	0.00219679	0.0475853	0.0015271	0.000770846	0.891654
KRT6A	0	0	5.69058e-10	7.33356e-258	0.924884	0.492027	0.0604714	0.00215875	0.0475967	0.0014232	0.000718434	0.891654
LINS1	0	0	5.22461e-10	6.73562e-258	0.933023	0.492971	0.0595448	0.00204462	0.0476166	0.00266342	0.00134462	0.891654
WNK4	0	0	5.27013e-10	5.48958e-258	0.929554	0.496892	0.0606583	0.00201166	0.0476881	-0.00100393	0.000506994	0.891654
CLCA2	0	0	5.18183e-10	7.34524e-258	0.924539	0.490881	0.0600415	0.00209619	0.0477044	-0.00139396	0.000704015	0.891654
TMBIM1	0	0	5.30122e-10	1.03816e-257	0.925219	0.498532	0.0629564	0.00186483	0.0477064	-0.00142208	0.000718226	0.891654
TACR2	0	0	5.24478e-10	7.94757e-258	0.924418	0.49576	0.0595934	0.00202305	0.0477801	-0.00226833	0.00114601	0.891654
TLE2	0	0	5.189e-10	9.19437e-258	0.930354	0.491645	0.0602111	0.0022173	0.0477883	0.00130956	0.000661642	0.891654
EIF5	0	0	5.01661e-10	1.23585e-257	0.92632	0.493336	0.0613072	0.00198663	0.0478177	-0.00485295	0.00245222	0.891654
KLK2	0	0	5.0658e-10	6.45325e-258	0.924591	0.494977	0.0604795	0.00197552	0.0478714	0.00188691	0.000953696	0.891654
TMEM106B	0	0	5.4519e-10	6.4279e-258	0.927934	0.490197	0.0621274	0.00198285	0.0479105	0.00536605	0.00271262	0.891654
ETV5	0	0	5.20316e-10	6.46211e-258	0.923566	0.496195	0.0604291	0.00211806	0.047956	-0.00270901	0.00136973	0.891654
FAM151A	0	0	5.21143e-10	6.81847e-258	0.933076	0.491715	0.0617801	0.00204406	0.048089	-0.00144217	0.000729623	0.893233
LIMA1	0	0	5.07895e-10	6.76879e-258	0.920881	0.493702	0.0598054	0.00206015	0.0483096	-0.0027056	0.00137016	0.89443
HYI	0	0	5.27083e-10	9.46568e-258	0.936829	0.491636	0.0609878	0.00195187	0.0483248	0.0016076	0.000814173	0.89443
LTBP1	0	0	5.12694e-10	9.70095e-258	0.928244	0.49449	0.0602611	0.00227274	0.0483666	0.000726257	0.000367883	0.89443
CLUH	0	0	5.37522e-10	5.3813e-258	0.93165	0.498377	0.0604121	0.00207954	0.0484107	-0.00149355	0.000756703	0.89443
SERINC5	0	0	5.23077e-10	1.04077e-257	0.926127	0.489727	0.0609051	0.00209544	0.0484572	-0.00184533	0.000935126	0.89443
ATF7IP	0	0	5.21721e-10	6.91925e-258	0.92766	0.493049	0.0605182	0.00218401	0.0485062	0.00126432	0.000640835	0.89443
WNT2B	0	0	5.28513e-10	7.62455e-258	0.92741	0.49375	0.0595425	0.00210405	0.0485893	0.00230683	0.00116968	0.89443
MYOM3	0	0	5.05001e-10	8.0791e-258	0.938044	0.496831	0.0598658	0.00197277	0.0486075	0.000889255	0.000450933	0.89443
MALT1	0	0	5.33344e-10	1.11404e-257	0.932684	0.490739	0.0598678	0.00207671	0.0486265	-0.00222786	0.00112982	0.89443
OR5M8	0	0	5.5096e-10	1.12997e-257	0.922619	0.491021	0.0619247	0.002078	0.0486355	0.00172067	0.000872645	0.89443
JADE1	0	0	5.32275e-10	5.96999e-258	0.931738	0.497211	0.0599884	0.00211749	0.0487583	0.0028224	0.00143217	0.895296
CRYBA4	0	0	5.23561e-10	8.7928e-258	0.925446	0.494626	0.0611903	0.00202532	0.048791	-0.00390552	0.00198206	0.895296
PSG9	0	0	5.13521e-10	7.42589e-258	0.934367	0.494843	0.0612447	0.00206361	0.0488476	-0.00234132	0.00118853	0.895296
MYLIP	0	0	5.22017e-10	6.7767e-258	0.93255	0.489019	0.0598921	0.0022378	0.0488925	-0.00226822	0.00115165	0.895296
ABHD13	0	0	5.30431e-10	6.64091e-258	0.934829	0.489111	0.0601663	0.00206698	0.0489954	0.00335762	0.00170555	0.895296
FASTKD5	0	0	5.32267e-10	5.94525e-258	0.923956	0.493858	0.0616977	0.002207	0.0490719	0.00161968	0.000823014	0.895296
NBEAL1	0	0	5.24413e-10	8.74185e-258	0.923296	0.495798	0.0615097	0.00184992	0.0490835	0.00068983	0.000350544	0.895296
RILPL2	0	0	5.13584e-10	8.80077e-258	0.9339	0.493203	0.061536	0.00210054	0.0491237	0.00356755	0.00181321	0.895296
RBL1	0	0	5.38256e-10	8.63773e-258	0.921224	0.492265	0.0612214	0.00220093	0.0491475	-0.00112669	0.000572701	0.895296
FOXM1	0	0	5.52824e-10	7.31939e-258	0.928956	0.495063	0.0602754	0.00213802	0.0492557	0.00198487	0.0010094	0.895296
SLC9B1	0	0	5.22023e-10	7.13309e-258	0.926363	0.493031	0.060661	0.00209931	0.049267	0.00323522	0.00164534	0.895296
ZNF506	0	0	5.24045e-10	8.48552e-258	0.930304	0.49127	0.0607907	0.00213748	0.0493122	0.00415478	0.00211342	0.895296
TBX15	0	0	5.29462e-10	6.92775e-258	0.926193	0.496726	0.0623598	0.00199924	0.0493597	-0.00228616	0.00116315	0.895296
SNRPA	0	0	5.15581e-10	7.06797e-258	0.930472	0.495993	0.061187	0.00203132	0.0494434	0.00508071	0.00258591	0.895296
KRTAP12-2	0	0	5.25755e-10	9.34226e-258	0.924662	0.491782	0.061137	0.00224225	0.0494484	-0.00230208	0.00117171	0.895296
RACK1	0	0	5.05176e-10	9.15954e-258	0.924286	0.497222	0.0606303	0.00209586	0.0494745	0.00464151	0.0023627	0.895296
SND1	0	0	5.29962e-10	5.54921e-258	0.932241	0.493971	0.0615943	0.00198374	0.0495636	-0.00181545	0.00092449	0.895296
PAGE2B	0	0	5.41887e-10	1.13962e-257	0.922569	0.496367	0.061393	0.00211722	0.0496491	0.019972	0.0101742	0.895296
SIGLEC7	0	0	5.12901e-10	7.40414e-258	0.928613	0.504598	0.0607772	0.00218972	0.0496546	0.00296951	0.00151279	0.895296
DRD4	0	0	5.32174e-10	7.7365e-258	0.927325	0.492727	0.0611743	0.00204767	0.0497099	0.00165261	0.000842108	0.895296
SERPINA1	0	0	5.16642e-10	7.9477e-258	0.933723	0.495276	0.0605767	0.00224276	0.0497437	0.00122413	0.000623862	0.895296
KIF22	0	0	5.14554e-10	7.19706e-258	0.933062	0.492166	0.0616511	0.00212325	0.049791	0.0019728	0.00100562	0.895296
ZNF750	0	0	5.22271e-10	7.97049e-258	0.918699	0.491443	0.0618147	0.00202686	0.0497923	-0.00171596	0.000874705	0.895296
PRSS38	0	0	5.0397e-10	7.82992e-258	0.920951	0.49962	0.060536	0.00204599	0.0498979	-0.00333813	0.00170238	0.895497
FAM200A	0	0	5.47883e-10	7.01902e-258	0.927481	0.494916	0.063121	0.00198258	0.0499	-0.00153587	0.000783275	0.895497
TPX2	0	0	5.39427e-10	7.44856e-258	0.932567	0.489607	0.061245	0.0021523	0.0499782	0.00202064	0.00103085	0.896034
NOC4L	0	0	5.25162e-10	1.14774e-257	0.927615	0.495605	0.0610177	0.00207428	0.0501268	-0.00150733	0.000769479	0.896506
NDUFC2	0	0	5.01813e-10	7.10546e-258	0.926703	0.497816	0.0607878	0.00209663	0.0501345	0.0176372	0.00900392	0.896506
YIPF4	0	0	5.15643e-10	7.39222e-258	0.928706	0.490806	0.0617897	0.00202861	0.0501495	0.00356063	0.00181785	0.896506
UCN	0	0	5.09623e-10	7.31182e-258	0.926211	0.498861	0.0612619	0.00214638	0.0503125	-0.00481535	0.00246018	0.896906
MRPS28	0	0	5.17426e-10	1.19051e-257	0.933327	0.496952	0.0612886	0.00200101	0.0503158	0.00196954	0.00100626	0.896906
ATP5F1	0	0	4.88607e-10	8.77138e-258	0.925917	0.49186	0.0608544	0.00214952	0.0503902	-0.00291111	0.0014878	0.896906
EIF2S2	0	0	5.50783e-10	7.04774e-258	0.920879	0.495207	0.0615191	0.00203068	0.0504166	0.00487128	0.00248988	0.896906
TBKBP1	0	0	5.46084e-10	9.50324e-258	0.932271	0.497582	0.0591355	0.00212584	0.0505137	-0.00240615	0.00123039	0.896906
ATP6V1D	0	0	4.99749e-10	8.05323e-258	0.924462	0.495055	0.0605324	0.00205217	0.0505548	-0.00166688	0.000852514	0.896906
ZFP62	0	0	5.50656e-10	5.79681e-258	0.926442	0.489855	0.0600531	0.00210994	0.0506499	0.00201334	0.00103013	0.896906
PRSS50	0	0	5.27267e-10	7.78633e-258	0.922551	0.490474	0.0598956	0.00204862	0.0507033	0.00200222	0.00102468	0.896906
FAM78A	0	0	4.9746e-10	8.8652e-258	0.922632	0.492085	0.061064	0.00214125	0.0507033	-0.00270009	0.00138183	0.896906
OLIG3	0	0	5.45637e-10	8.03973e-258	0.92736	0.498743	0.0609597	0.00197378	0.0507155	-0.0026773	0.00137024	0.896906
ANKRD44	0	0	5.31535e-10	6.90148e-258	0.929465	0.489882	0.0607219	0.00206384	0.050732	-0.00140205	0.000717618	0.896906
GRAMD1A	0	0	5.10221e-10	1.18027e-257	0.929097	0.497312	0.0607793	0.00202851	0.0507942	-0.00162396	0.000831425	0.896906
AGPS	0	0	5.27775e-10	6.65422e-258	0.933379	0.500046	0.0611189	0.00211782	0.0508002	0.00364319	0.00186526	0.896906
CABIN1	0	0	5.26354e-10	7.87167e-258	0.921816	0.493458	0.0621178	0.00181728	0.0509148	-0.000749834	0.000384094	0.898023
OR51T1	0	0	5.04278e-10	7.06495e-258	0.923664	0.495594	0.06121	0.0020466	0.0510055	0.00273858	0.00140336	0.898023
ATP11C	0	0	5.10023e-10	6.14146e-258	0.925338	0.500309	0.0615076	0.00209987	0.0510086	0.00290382	0.00148805	0.898023
SLC22A10	0	0	5.15339e-10	8.56705e-258	0.936582	0.49092	0.060977	0.0020508	0.0510678	0.00156511	0.000802238	0.898212
TAX1BP3	0	0	5.34815e-10	8.48411e-258	0.926519	0.495181	0.0609385	0.00198818	0.0511627	-0.0018775	0.000962755	0.898285
TEX13B	0	0	5.1206e-10	1.11014e-257	0.921912	0.500522	0.0609313	0.00192309	0.0512501	-0.0090219	0.00462805	0.898285
IL24	0	0	5.02431e-10	9.4472e-258	0.925344	0.495576	0.0606137	0.00209984	0.0513658	-0.00264818	0.00135914	0.898285
GMFB	0	0	5.29824e-10	7.77002e-258	0.927624	0.495546	0.061307	0.00205301	0.0513931	0.00580884	0.00298165	0.898285
RPL35	0	0	5.20684e-10	1.00678e-257	0.925847	0.493074	0.0613492	0.00198971	0.0514223	-0.00351678	0.00180537	0.898285
CRH	0	0	5.31159e-10	9.91491e-258	0.92498	0.490837	0.0612076	0.00203142	0.051449	0.00588816	0.00302309	0.898285
STK11	0	0	5.11972e-10	1.03803e-257	0.935258	0.494793	0.0614348	0.0021427	0.0515212	0.00348976	0.00179226	0.898285
ENSA	0	0	5.17022e-10	8.23934e-258	0.933465	0.491126	0.0603669	0.00214824	0.0515664	-0.00681617	0.0035013	0.898285
PMPCB	0	0	5.38891e-10	9.99565e-258	0.92097	0.49711	0.061344	0.00221044	0.051593	0.00155629	0.000799519	0.898285
CINP	0	0	5.43355e-10	1.05786e-257	0.922337	0.49471	0.0610997	0.00212241	0.0515946	-0.0037633	0.00193335	0.898285
FHL2	0	0	5.1368e-10	9.441e-258	0.932698	0.496692	0.0616009	0.00207778	0.0516044	-0.00183106	0.000940723	0.898285
TSSK6	0	0	5.54002e-10	6.83421e-258	0.92376	0.496756	0.0611343	0.00211802	0.0516724	0.0048129	0.00247339	0.898501
SSBP3	0	0	5.34615e-10	6.98421e-258	0.925143	0.489221	0.0613341	0.00209273	0.0517428	-0.00367381	0.00188857	0.898501
HACD4	0	0	5.14961e-10	8.60684e-258	0.939479	0.489147	0.0616968	0.0019727	0.0517903	-0.00163853	0.000842482	0.898501
MED16	0	0	5.30522e-10	6.25268e-258	0.931111	0.494373	0.0612959	0.0021935	0.0519533	0.0011623	0.000598035	0.898501
METTL15	0	0	5.30909e-10	9.25277e-258	0.922718	0.49556	0.0617933	0.00200731	0.0519739	-0.00196361	0.00101042	0.898501
ZNF443	0	0	5.18056e-10	7.88949e-258	0.935987	0.494538	0.0627471	0.00207666	0.0520214	0.00204109	0.0010505	0.898501
SPO11	0	0	5.08126e-10	9.60331e-258	0.920494	0.490634	0.0611548	0.00205522	0.0520557	0.00153442	0.000789843	0.898501
GALP	0	0	5.3387e-10	9.3698e-258	0.916072	0.494306	0.0622698	0.00209161	0.0521878	-0.00357633	0.00184195	0.898501
GBF1	0	0	5.25103e-10	8.34934e-258	0.932899	0.492681	0.061012	0.00197331	0.052366	-0.00132861	0.000684807	0.898501
ALDH16A1	0	0	5.21605e-10	8.36422e-258	0.930695	0.497732	0.0600724	0.00201524	0.0523827	0.000699829	0.000360738	0.898501
RAB41	0	0	5.34228e-10	7.86023e-258	0.933373	0.488414	0.0620086	0.00208572	0.0524378	0.00804169	0.00414619	0.898501
MTFMT	0	0	5.3677e-10	1.11713e-257	0.933255	0.497004	0.0619469	0.00192345	0.0525397	-0.00122452	0.000631618	0.898501
NRAS	0	0	5.18389e-10	6.42805e-258	0.924825	0.494799	0.0605955	0.0021307	0.0526186	-0.00705064	0.003638	0.898501
MTHFD2L	0	0	5.01527e-10	1.07442e-257	0.934728	0.496565	0.0620579	0.00194112	0.0526638	0.00171828	0.000886772	0.898501
ABCB5	0	0	5.25916e-10	8.32955e-258	0.934898	0.491684	0.0613169	0.00202825	0.0527338	0.000812567	0.000419474	0.898501
ALG5	0	0	5.29032e-10	8.24497e-258	0.925146	0.490241	0.0614646	0.00210926	0.0527839	-0.00364258	0.00188082	0.898501
SUMO4	0	0	5.33621e-10	9.35171e-258	0.933871	0.491195	0.0609526	0.00204545	0.0528484	-0.00568371	0.00293554	0.898501
OR52B4	0	0	5.24579e-10	7.84168e-258	0.927201	0.495614	0.0605669	0.00197139	0.0529102	-0.00265695	0.00137263	0.898501
HTR2B	0	0	5.2718e-10	6.99076e-258	0.929988	0.4955	0.0615754	0.00201714	0.0529423	-0.00213968	0.00110555	0.898501
EVC	0	0	5.27598e-10	8.5873e-258	0.9275	0.499307	0.0596358	0.00199881	0.0531472	-0.000914597	0.000472968	0.898501
UNC50	0	0	4.92463e-10	7.04885e-258	0.924341	0.495762	0.0608678	0.00211979	0.0532338	-0.00307712	0.00159186	0.898501
CHM	0	0	5.16662e-10	6.21339e-258	0.920003	0.494251	0.0611874	0.0020651	0.0532345	0.00194136	0.00100431	0.898501
RIPK1	0	0	5.08808e-10	6.5705e-258	0.931442	0.496513	0.0611009	0.00206962	0.0532979	-0.00210051	0.00108693	0.898501
INHBB	0	0	5.36843e-10	7.5566e-258	0.927989	0.498218	0.0603195	0.00212343	0.0533451	-0.00347164	0.00179679	0.898501
PIK3IP1	0	0	5.095e-10	8.47055e-258	0.929986	0.492837	0.0619089	0.00207495	0.0534429	0.00273791	0.00141762	0.898501
FBXL20	0	0	5.25104e-10	5.51965e-258	0.927732	0.492477	0.0607912	0.00205606	0.053475	-0.00339979	0.00176056	0.898501
RIPPLY1	0	0	5.02014e-10	9.00745e-258	0.926958	0.492625	0.0609711	0.0022554	0.0535616	0.00590493	0.00305894	0.898501
TRIM54	0	0	5.39122e-10	7.91921e-258	0.923888	0.492788	0.0626286	0.00218445	0.053579	0.00157601	0.000816486	0.898501
PHACTR2	0	0	5.25377e-10	1.11804e-257	0.932792	0.492506	0.0614924	0.00202181	0.053656	0.00198267	0.0010275	0.898501
IL17A	0	0	5.1897e-10	1.01394e-257	0.920231	0.495331	0.0614142	0.00213168	0.0536721	0.00337788	0.00175066	0.898501
CDC23	0	0	5.29674e-10	1.10205e-257	0.929872	0.491242	0.0617058	0.00219206	0.0537665	0.00247923	0.00128542	0.898501
SMPD2	0	0	5.24827e-10	7.13548e-258	0.931156	0.488568	0.0599884	0.00192243	0.0537721	-0.00232779	0.00120693	0.898501
BCS1L	0	0	5.20827e-10	8.67445e-258	0.927331	0.500932	0.0599788	0.002109	0.0537981	0.00201446	0.00104459	0.898501
CYC1	0	0	5.29034e-10	9.07139e-258	0.929324	0.493692	0.0620763	0.00202062	0.0538608	-0.00338887	0.00175774	0.898501
PEG3	0	0	5.00681e-10	7.39687e-258	0.928414	0.500192	0.0603509	0.0021752	0.0538704	-0.000942218	0.00048873	0.898501
ZMYM6	0	0	5.32897e-10	7.62196e-258	0.922147	0.49495	0.0605339	0.00221046	0.0539137	0.000936402	0.0004858	0.898501
TMEM11	0	0	5.24561e-10	1.03456e-257	0.932921	0.498892	0.0605535	0.00202788	0.0539843	-0.00578871	0.00300404	0.898501
RAB40B	0	0	4.99896e-10	7.46563e-258	0.922259	0.494887	0.0616811	0.00200196	0.0540204	-0.00205064	0.00106433	0.898501
SLC25A15	0	0	5.38568e-10	7.95441e-258	0.922134	0.491104	0.0612695	0.00210859	0.0540664	-0.0019546	0.00101468	0.898501
KDM4B	0	0	4.99717e-10	9.26972e-258	0.923941	0.493847	0.0613962	0.00208266	0.0541588	-0.00185878	0.000965309	0.898501
PRAMEF14	0	0	5.30495e-10	7.9862e-258	0.929693	0.495523	0.061721	0.00191878	0.054191	0.00228548	0.00118707	0.898501
PRR35	0	0	5.23293e-10	6.27903e-258	0.928927	0.493464	0.0617618	0.00208331	0.0542162	-0.00149405	0.000776083	0.898501
EXOC3L2	0	0	5.22706e-10	7.2761e-258	0.922621	0.496044	0.0610364	0.00205211	0.0542543	-0.00173871	0.000903311	0.898501
BRCA1	0	0	5.32422e-10	6.2677e-258	0.927563	0.492605	0.060994	0.00199889	0.0543895	0.00133034	0.000691537	0.898501
PLSCR3	0	0	5.20779e-10	7.42326e-258	0.927514	0.497254	0.0610388	0.0020469	0.0543981	-0.00323396	0.00168114	0.898501
BPIFA1	0	0	5.33654e-10	8.95278e-258	0.924527	0.49443	0.0607958	0.0020546	0.0546128	-0.00593989	0.00309054	0.898501
FUZ	0	0	5.10122e-10	8.64426e-258	0.927717	0.495039	0.0612658	0.00215709	0.0546145	-0.00250017	0.00130085	0.898501
DEFB132	0	0	5.28247e-10	6.22821e-258	0.922726	0.498758	0.0619595	0.00212842	0.0547132	-0.0060853	0.00316751	0.898501
IRX2	0	0	5.35433e-10	8.67048e-258	0.929619	0.491845	0.0608477	0.00213819	0.0547169	-0.00283856	0.00147754	0.898501
MAP7D2	0	0	5.42804e-10	8.7225e-258	0.935829	0.493172	0.0610845	0.00205388	0.054722	0.00356048	0.00185336	0.898501
TCF19	0	0	5.2586e-10	7.16096e-258	0.926196	0.497611	0.0614885	0.00212679	0.05473	0.00270134	0.0014062	0.898501
SLC35C1	0	0	5.37567e-10	1.02262e-257	0.926716	0.496807	0.060639	0.00204373	0.0547659	0.00352223	0.00183378	0.898501
SLC17A8	0	0	5.12753e-10	8.41701e-258	0.932907	0.493308	0.0595803	0.00210886	0.0549119	0.00128278	0.000668258	0.898501
GFY	0	0	5.13382e-10	5.94062e-258	0.921853	0.495576	0.0594888	0.00221268	0.0550902	0.00223601	0.00116569	0.898501
DAGLA	0	0	5.24956e-10	8.74782e-258	0.925874	0.494931	0.0609453	0.00203592	0.0551412	0.00173632	0.000905382	0.898501
NOD2	0	0	5.10095e-10	8.95783e-258	0.931518	0.493002	0.0610226	0.00228766	0.0551976	0.000789056	0.000411539	0.898501
ZKSCAN5	0	0	5.17583e-10	9.09953e-258	0.930091	0.493432	0.0613705	0.00188656	0.055206	-0.00151696	0.000791211	0.898501
TMEM114	0	0	5.11176e-10	8.8535e-258	0.924542	0.496068	0.0615151	0.0021416	0.0552422	0.00194157	0.00101283	0.898501
FAM3A	0	0	5.17987e-10	9.33304e-258	0.927978	0.492999	0.0612128	0.00208168	0.0552559	0.00719454	0.00375327	0.898501
SYNPO	0	0	5.10001e-10	8.27113e-258	0.925276	0.495653	0.0626936	0.00189051	0.0552613	0.00156029	0.000813995	0.898501
RASA4	0	0	5.6987e-10	7.89157e-258	0.920883	0.491716	0.0594356	0.00209435	0.0553474	0.0141941	0.0074076	0.898501
STAB1	0	0	5.23097e-10	7.26644e-258	0.924277	0.498649	0.0608582	0.00218265	0.0553515	0.000631412	0.000329526	0.898501
PREP	0	0	5.49501e-10	8.56146e-258	0.926051	0.499097	0.061932	0.00214659	0.0553549	0.00191516	0.000999514	0.898501
EEF2	0	0	5.11718e-10	6.65678e-258	0.929834	0.491876	0.0607081	0.00200398	0.0554267	-0.00258083	0.00134732	0.898501
RNF224	0	0	5.2258e-10	1.01883e-257	0.9215	0.493517	0.0607412	0.00206411	0.0555267	-0.00260888	0.00136252	0.898501
TRMT10A	0	0	5.37392e-10	8.43001e-258	0.927431	0.500207	0.0607879	0.00203576	0.0555623	-0.00185545	0.000969175	0.898501
WDR31	0	0	4.83902e-10	7.93329e-258	0.929673	0.495087	0.0615987	0.00204958	0.0555842	0.00123552	0.000645419	0.898501
PLPP3	0	0	5.05529e-10	9.71009e-258	0.927624	0.493515	0.0608201	0.00205286	0.0556586	0.00358216	0.00187184	0.898501
TMEM65	0	0	5.03428e-10	9.41539e-258	0.924489	0.497694	0.0597843	0.00213483	0.0556998	0.00494904	0.00258652	0.898501
S100A10	0	0	5.17513e-10	7.20094e-258	0.925139	0.496063	0.0613732	0.00208316	0.0557372	-0.00253144	0.00132321	0.898501
NONO	0	0	5.52479e-10	9.00261e-258	0.924391	0.495826	0.0615256	0.00199169	0.0557461	-0.00363425	0.00189974	0.898501
ARL6	0	0	5.25828e-10	7.09038e-258	0.933188	0.497777	0.0609594	0.00203039	0.0558389	0.00503037	0.00263053	0.898501
CLEC9A	0	0	5.09215e-10	8.54731e-258	0.92307	0.497042	0.060147	0.00207214	0.0558622	-0.0085831	0.00448878	0.898501
GPATCH11	0	0	5.22073e-10	7.75878e-258	0.931263	0.49922	0.0611431	0.00204367	0.0558957	0.00251181	0.0013138	0.898501
ZMYND10	0	0	5.27327e-10	6.8127e-258	0.932155	0.494847	0.0601361	0.00216343	0.0559435	-0.00138789	0.000726079	0.898501
NEFM	0	0	5.35185e-10	7.7194e-258	0.923326	0.495476	0.0611503	0.0021596	0.0559736	-0.00202834	0.00106126	0.898501
CTSC	0	0	5.41119e-10	8.45485e-258	0.936095	0.497138	0.061402	0.00200417	0.0559962	0.00193151	0.00101069	0.898501
HRK	0	0	5.29584e-10	6.47288e-258	0.928036	0.492551	0.0603081	0.0020321	0.0561233	0.00741877	0.00388398	0.898501
RAPGEF4	0	0	5.10168e-10	1.00522e-257	0.927923	0.491638	0.0597537	0.00218364	0.0562091	-0.00117252	0.00061407	0.898501
SEC31B	0	0	5.43234e-10	9.11677e-258	0.937787	0.487942	0.0610178	0.00200256	0.0562136	0.000860442	0.000450637	0.898501
CD33	0	0	5.25214e-10	7.54648e-258	0.921388	0.499413	0.0622445	0.00209538	0.0562627	-0.00260484	0.0013645	0.898501
F2RL3	0	0	5.38235e-10	9.87052e-258	0.928433	0.494425	0.0611342	0.00212577	0.0562721	-0.00189573	0.000993081	0.898501
MICU3	0	0	5.55573e-10	8.30745e-258	0.926342	0.4928	0.0624718	0.00205147	0.0562851	0.00152226	0.000797479	0.898501
TSSK3	0	0	5.23099e-10	6.9907e-258	0.927927	0.492615	0.0614492	0.0021486	0.0562896	0.00211021	0.00110551	0.898501
CBX2	0	0	5.39142e-10	9.4189e-258	0.924456	0.493409	0.0612672	0.00218844	0.0564171	0.00227697	0.0011935	0.898501
HELZ2	0	0	5.10529e-10	9.3854e-258	0.927003	0.498488	0.060798	0.0021642	0.0565554	0.000605868	0.00031775	0.898501
OAS1	0	0	5.18563e-10	7.48209e-258	0.928333	0.494416	0.0609522	0.0020865	0.0565622	0.00240303	0.00126031	0.898501
SYNJ2BP	0	0	5.16061e-10	8.08929e-258	0.923102	0.496362	0.0626253	0.00211609	0.0565799	0.00768457	0.0040306	0.898501
ERAP2	0	0	5.10488e-10	7.16549e-258	0.92466	0.492902	0.0614016	0.00201024	0.0565946	-0.00113558	0.000595654	0.898501
SGCD	0	0	5.11557e-10	7.12239e-258	0.933759	0.501395	0.0610681	0.001968	0.056616	-0.00268962	0.00141093	0.898501
RABGGTB	0	0	5.33232e-10	6.17573e-258	0.927016	0.493805	0.0602694	0.0021036	0.0566705	0.00408755	0.00214473	0.898501
ALS2CL	0	0	5.44938e-10	7.60606e-258	0.923232	0.490033	0.0603686	0.0021463	0.056776	0.000952243	0.000499853	0.898501
CHD1L	0	0	4.95095e-10	8.18986e-258	0.929327	0.492825	0.0623169	0.00210939	0.056779	-0.00127374	0.000668623	0.898501
SLC29A1	0	0	4.83917e-10	1.10091e-257	0.927031	0.49682	0.0615071	0.00202151	0.056812	-0.00163926	0.000860606	0.898501
HECA	0	0	5.38142e-10	1.02289e-257	0.926644	0.495506	0.0604854	0.00212599	0.0568161	-0.00398111	0.00209011	0.898501
C5orf22	0	0	5.33395e-10	8.5357e-258	0.924607	0.498286	0.061114	0.00213126	0.0568252	0.00107472	0.000564258	0.898501
CD4	0	0	5.04573e-10	7.52015e-258	0.929507	0.483495	0.0610558	0.00216266	0.056834	-0.00197024	0.00103446	0.898501
RHCG	0	0	5.46519e-10	9.92045e-258	0.924102	0.496398	0.0617528	0.00191504	0.056841	0.00161771	0.000849394	0.898501
VPS37D	0	0	5.31838e-10	7.83338e-258	0.922676	0.491879	0.0609127	0.0021867	0.0568438	0.00221597	0.00116353	0.898501
PDE6D	0	0	5.32208e-10	9.60996e-258	0.929767	0.493434	0.0611894	0.00214156	0.0568921	0.00362773	0.00190517	0.898501
CD164	0	0	5.10674e-10	8.01503e-258	0.926947	0.497311	0.0610986	0.00201132	0.0569488	-0.00288441	0.00151515	0.898501
PDZD11	0	0	5.17345e-10	1.03057e-257	0.933465	0.496856	0.0601732	0.00206379	0.0569875	0.00849371	0.00446233	0.898501
KLF16	0	0	5.16923e-10	8.59056e-258	0.91758	0.493017	0.0609768	0.00217566	0.0570401	0.0045656	0.00239914	0.898501
TBC1D26	0	0	5.19095e-10	8.90946e-258	0.927053	0.496369	0.0605452	0.00209774	0.0570542	0.00335586	0.00176354	0.898501
RPH3A	0	0	5.355e-10	1.08315e-257	0.927144	0.492585	0.060946	0.00206812	0.057144	-0.0015846	0.000833028	0.898501
PITX1	0	0	5.19507e-10	6.03189e-258	0.923025	0.493943	0.0615002	0.00214288	0.0572	-0.00326109	0.00171474	0.898501
TCHHL1	0	0	5.3602e-10	8.36976e-258	0.93467	0.500747	0.0610776	0.0019711	0.0572194	-0.00157287	0.000827109	0.898501
GJA8	0	0	5.09441e-10	6.33767e-258	0.928445	0.496407	0.0605191	0.00217456	0.0572283	0.00166996	0.000878195	0.898501
C12orf66	0	0	5.56669e-10	7.22033e-258	0.923396	0.497604	0.0628383	0.00206013	0.0572816	0.00452282	0.00237896	0.898501
TAF2	0	0	5.12011e-10	1.03643e-257	0.930526	0.501021	0.0620787	0.00202976	0.0572905	-0.00172758	0.000908725	0.898501
ZBTB8A	0	0	4.88963e-10	8.3133e-258	0.927076	0.491488	0.0608248	0.00212965	0.0573895	-0.00354459	0.00186523	0.898501
DRD2	0	0	5.34819e-10	8.4848e-258	0.923499	0.49476	0.0619378	0.00205914	0.0573941	0.00251657	0.00132429	0.898501
SYTL3	0	0	5.46226e-10	6.86732e-258	0.926336	0.49044	0.0619193	0.00211319	0.0574333	0.00131995	0.000694708	0.898501
ZYG11A	0	0	5.55839e-10	6.40299e-258	0.92397	0.493146	0.0607185	0.00200294	0.0574492	-0.00136768	0.000719871	0.898501
TMEM94	0	0	5.2467e-10	7.02838e-258	0.925345	0.498439	0.0612605	0.00215517	0.0575402	0.00142598	0.00075083	0.898501
REG4	0	0	5.4614e-10	8.64444e-258	0.928273	0.489667	0.0610863	0.00211814	0.0575855	0.00649974	0.00342298	0.898501
C6orf203	0	0	5.35109e-10	6.31826e-258	0.924445	0.497885	0.0606469	0.00209492	0.0576228	-0.00326201	0.00171814	0.898501
SYNE4	0	0	5.56464e-10	7.41838e-258	0.935952	0.494587	0.0595041	0.00212816	0.0576602	0.00127779	0.000673125	0.898501
NPIPB8	0	0	5.22768e-10	9.61284e-258	0.934011	0.493162	0.0615846	0.00201549	0.0576929	0.0167022	0.00879972	0.898501
EXD3	0	0	5.35222e-10	1.19716e-257	0.929147	0.494224	0.06093	0.00199402	0.0577017	0.000903245	0.0004759	0.898501
POU6F2	0	0	5.01879e-10	8.27487e-258	0.925459	0.494367	0.0604111	0.00212247	0.0577145	0.00198708	0.001047	0.898501
ZNF827	0	0	5.2363e-10	9.30295e-258	0.924529	0.495326	0.0602371	0.00203417	0.0577659	-0.00168563	0.000888352	0.898501
RAET1G	0	0	5.005e-10	6.43641e-258	0.921389	0.49299	0.0620693	0.00212263	0.0577905	0.00375976	0.00198164	0.898501
C8orf82	0	0	5.12073e-10	8.94654e-258	0.92749	0.492536	0.0605128	0.00208865	0.0578751	0.00323412	0.00170517	0.898501
CDK5R1	0	0	4.96497e-10	7.13688e-258	0.927818	0.494949	0.0594307	0.0021129	0.0579998	0.00712258	0.0037572	0.898501
CHMP2A	0	0	5.50524e-10	9.21772e-258	0.929468	0.495481	0.060827	0.00208137	0.0581238	-0.00418201	0.00220712	0.898501
SLC27A1	0	0	5.311e-10	1.20583e-257	0.931275	0.497001	0.0618594	0.00208877	0.0582012	0.00200238	0.00105712	0.898501
RASSF4	0	0	5.31804e-10	7.42634e-258	0.925749	0.498993	0.0606889	0.00212377	0.0583442	0.00179402	0.000947652	0.898501
TBC1D14	0	0	4.82676e-10	1.01486e-257	0.932374	0.492313	0.0600071	0.00213736	0.0584057	0.00158266	0.000836212	0.898501
ART4	0	0	5.08486e-10	8.80806e-258	0.929129	0.494769	0.0592801	0.0026005	0.058558	-0.00193389	0.00102241	0.898501
STK3	0	0	5.14639e-10	6.73916e-258	0.930949	0.497334	0.0615396	0.0020867	0.0586072	-0.00133841	0.000707727	0.898501
GEN1	0	0	5.35903e-10	7.49421e-258	0.930259	0.489044	0.0599947	0.00213264	0.0586093	0.00159818	0.000845093	0.898501
INTS11	0	0	5.20607e-10	6.22075e-258	0.92668	0.503937	0.0607081	0.00200491	0.0586655	0.00179586	0.000949837	0.898501
ZNRD1	0	0	5.05704e-10	8.04751e-258	0.926959	0.489318	0.0604097	0.00201192	0.0586678	-0.00248324	0.00131341	0.898501
LNPEP	0	0	5.57633e-10	1.01952e-257	0.93481	0.498142	0.0607115	0.00204198	0.058769	0.00177838	0.000940976	0.898501
TXN2	0	0	5.30428e-10	5.75644e-258	0.930456	0.493166	0.061549	0.00203759	0.0587839	-0.00247607	0.00131021	0.898501
TRIM17	0	0	5.28561e-10	1.07684e-257	0.929399	0.493595	0.0611997	0.00196079	0.0587921	-0.00208481	0.00110322	0.898501
KIAA0141	0	0	5.09827e-10	6.0695e-258	0.937832	0.492026	0.0637486	0.00194816	0.0588541	-0.00119525	0.000632645	0.898501
IKBKG	0	0	5.19145e-10	9.10156e-258	0.922716	0.493071	0.0607607	0.00209659	0.0589376	-0.00257628	0.00136407	0.898501
NOL12	0	0	5.25038e-10	9.76275e-258	0.926456	0.495237	0.062092	0.00206454	0.0589725	0.00242041	0.00128171	0.898501
THAP5	0	0	5.00579e-10	8.06957e-258	0.927384	0.49683	0.060493	0.00210829	0.0589988	-0.00378626	0.0020052	0.898501
NTM	0	0	5.25387e-10	7.07694e-258	0.928488	0.495439	0.060793	0.00206485	0.0590192	0.00271407	0.00143749	0.898501
ARMC4	0	0	5.13979e-10	1.19413e-257	0.927499	0.499209	0.0610098	0.00199288	0.05905	0.000823022	0.000435961	0.898501
AGXT2	0	0	5.17299e-10	6.83914e-258	0.927576	0.490918	0.0602703	0.0021067	0.0590726	0.00196349	0.00104017	0.898501
TBC1D10A	0	0	5.55103e-10	8.54461e-258	0.920863	0.493368	0.0616538	0.00208362	0.059104	0.00211395	0.00112001	0.898501
IDO2	0	0	5.45721e-10	7.52758e-258	0.929013	0.494015	0.0613605	0.00206712	0.0591148	-0.00222509	0.00117895	0.898501
SPRR2G	0	0	5.06864e-10	9.70999e-258	0.932502	0.49664	0.0619824	0.00205432	0.0591266	0.0192187	0.0101834	0.898501
RPL4	0	0	5.09245e-10	8.94745e-258	0.926079	0.492492	0.0612297	0.00210385	0.0591939	-0.00339447	0.00179909	0.898501
A1BG	0	0	5.28805e-10	1.02009e-257	0.926239	0.499886	0.0608945	0.00216652	0.0592073	-0.00116238	0.000616105	0.898501
FAM205A	0	0	4.96332e-10	6.88976e-258	0.928706	0.489412	0.0612995	0.00213254	0.0592167	0.0011736	0.00062207	0.898501
PTCD3	0	0	5.24726e-10	6.97183e-258	0.932036	0.493894	0.0618858	0.00201684	0.0592638	0.00127305	0.000674911	0.898501
NPIPB11	0	0	4.99122e-10	1.11202e-257	0.930987	0.496068	0.060306	0.0021005	0.059307	0.00152438	0.000808292	0.898501
NOB1	0	0	5.3182e-10	9.27547e-258	0.920614	0.492595	0.0602748	0.00197516	0.0593557	-0.000774088	0.000410534	0.898501
SLC7A6	0	0	5.10978e-10	6.9555e-258	0.923008	0.494175	0.061294	0.00216053	0.0594013	0.00278694	0.0014783	0.898501
TNFSF18	0	0	5.45065e-10	8.71771e-258	0.928076	0.493983	0.0601821	0.00219844	0.0594144	0.00122587	0.000650286	0.898501
OR8K5	0	0	5.04946e-10	1.14204e-257	0.924819	0.494293	0.0603057	0.00209413	0.0594561	-0.00192341	0.00102047	0.898501
POC5	0	0	5.18081e-10	7.57509e-258	0.923473	0.497364	0.0621681	0.00204982	0.0595212	0.00242799	0.00128851	0.898501
OSGIN1	0	0	5.12833e-10	7.63175e-258	0.926932	0.492369	0.060982	0.00229854	0.0595546	-0.000829205	0.000440109	0.898501
C1orf74	0	0	5.57663e-10	8.39147e-258	0.923216	0.496889	0.0616059	0.00196244	0.0595629	-0.00248252	0.00131766	0.898501
PALM	0	0	5.32708e-10	6.46465e-258	0.92443	0.496728	0.0608984	0.00211577	0.0595928	-0.00133921	0.000710906	0.898501
PRAME	0	0	5.23862e-10	8.80325e-258	0.930001	0.492054	0.0612488	0.00206759	0.0596504	-0.00222546	0.00118163	0.898501
KRTAP4-4	0	0	5.14201e-10	7.68448e-258	0.923867	0.489704	0.0615342	0.00217444	0.0597005	0.00320692	0.00170308	0.898501
DMP1	0	0	5.3855e-10	5.54589e-258	0.92757	0.494557	0.0611659	0.00202912	0.0597453	-0.00239885	0.00127416	0.898501
ACSM4	0	0	5.31183e-10	7.41287e-258	0.924028	0.493567	0.0607515	0.00196969	0.0597469	0.00116541	0.000619019	0.898501
ARSA	0	0	4.90874e-10	7.4965e-258	0.927574	0.489469	0.0608953	0.00203772	0.0598047	-0.00192295	0.00102163	0.898501
NUDT18	0	0	5.39291e-10	8.58328e-258	0.925925	0.493904	0.0607717	0.00207595	0.0598478	0.0023024	0.00122342	0.898501
DUSP2	0	0	5.56738e-10	9.25066e-258	0.923113	0.495796	0.0603971	0.00208066	0.0598834	0.0014475	0.000769263	0.898501
MRAP2	0	0	5.37137e-10	6.72857e-258	0.922721	0.500156	0.0610928	0.00206381	0.0599218	0.00283502	0.00150688	0.898501
MUM1L1	0	0	5.23779e-10	9.45812e-258	0.919128	0.496403	0.0608429	0.00205004	0.0599844	0.0027591	0.00146689	0.898501
ZNF230	0	0	5.09688e-10	6.1055e-258	0.929849	0.493097	0.060829	0.00199827	0.0600247	0.00174916	0.000930097	0.898501
EMC6	0	0	5.24439e-10	8.62735e-258	0.931768	0.495367	0.0617962	0.00210067	0.060064	0.00885558	0.00470957	0.898501
CHRNA9	0	0	4.83561e-10	6.73889e-258	0.925674	0.494985	0.0616631	0.00199829	0.0600969	-0.00115405	0.000613824	0.898501
PHYHD1	0	0	5.29394e-10	7.57823e-258	0.927067	0.491783	0.0616027	0.00212298	0.0601161	-0.00154068	0.000819528	0.898501
ATP1A1	0	0	5.14204e-10	7.423e-258	0.922305	0.497759	0.0609682	0.0020131	0.0601839	-0.00376987	0.00200583	0.898501
PCDHB4	0	0	5.09513e-10	9.8336e-258	0.936642	0.495024	0.0603902	0.0019328	0.0602115	-0.00144209	0.000767374	0.898501
GSK3A	0	0	5.13711e-10	8.50544e-258	0.929405	0.494048	0.0604389	0.00203572	0.060231	-0.0039896	0.00212313	0.898501
KNOP1	0	0	5.21021e-10	7.20468e-258	0.925107	0.492452	0.0618419	0.00207875	0.0602561	-0.0020688	0.00110105	0.898501
NPR1	0	0	5.14816e-10	9.60554e-258	0.926939	0.492939	0.0611214	0.00196267	0.0602849	0.00107527	0.000572341	0.898501
POLDIP2	0	0	5.0743e-10	7.55699e-258	0.938567	0.495262	0.0604693	0.00208251	0.0604465	0.00359942	0.0019171	0.898501
NAALADL2	0	0	5.5523e-10	1.22993e-257	0.929032	0.495483	0.0609104	0.00210792	0.0604854	0.00162613	0.000866226	0.898501
INTS3	0	0	4.99515e-10	8.80025e-258	0.9338	0.496001	0.0608178	0.00222871	0.0605879	-0.00201917	0.00107603	0.898501
ANG	0	0	5.26023e-10	8.12626e-258	0.929558	0.494456	0.0608297	0.00202458	0.0606346	0.00645011	0.00343792	0.898501
SMKR1	0	0	5.36429e-10	6.59369e-258	0.926423	0.492602	0.0593849	0.0021427	0.0607346	0.00543115	0.00289594	0.898501
CD300LF	0	0	5.21076e-10	8.70199e-258	0.92678	0.495674	0.0613708	0.00211546	0.060737	0.00339998	0.00181291	0.898501
WDR43	0	0	4.93795e-10	7.35691e-258	0.923803	0.492266	0.0605553	0.00221216	0.060766	-0.00161187	0.00085957	0.898501
CYSTM1	0	0	5.6182e-10	6.15147e-258	0.928023	0.495755	0.0613704	0.00210866	0.0608221	-0.00868774	0.00463395	0.898501
FAM117A	0	0	5.39056e-10	9.6383e-258	0.924953	0.499764	0.0606189	0.00198883	0.0608436	0.00231445	0.00123461	0.898501
MEPE	0	0	5.44564e-10	8.80191e-258	0.926986	0.493819	0.0613086	0.00219111	0.0608594	0.00262236	0.00139894	0.898501
SPI1	0	0	5.4478e-10	6.94543e-258	0.924712	0.492359	0.0612874	0.00212526	0.060894	-0.00385218	0.00205529	0.898501
IRF8	0	0	5.30707e-10	6.16687e-258	0.928955	0.493957	0.0622416	0.00199442	0.0609939	-0.00159213	0.00084979	0.898501
S1PR4	0	0	5.27737e-10	7.37182e-258	0.930143	0.491604	0.0611521	0.00209317	0.0610314	0.00231078	0.00123355	0.898501
ZCCHC2	0	0	5.00224e-10	7.51369e-258	0.922387	0.494057	0.0605369	0.00211219	0.0610487	-0.00121561	0.000648961	0.898501
TMED4	0	0	4.99767e-10	7.93562e-258	0.925199	0.495502	0.061448	0.00202788	0.0610848	-0.00283804	0.00151532	0.898501
HENMT1	0	0	5.12964e-10	1.31103e-257	0.931065	0.496151	0.0608103	0.00214306	0.06111	0.00275574	0.00147152	0.898501
EMB	0	0	5.02927e-10	6.01205e-258	0.922096	0.496111	0.0625726	0.0021076	0.0611346	0.00196788	0.00105092	0.898501
SLC7A7	0	0	5.36188e-10	7.47324e-258	0.929137	0.49159	0.0611867	0.00214303	0.0612014	0.00168704	0.000901171	0.898501
GOLGA6L6	0	0	5.40424e-10	7.96657e-258	0.932927	0.495672	0.0610272	0.00207507	0.0612131	-0.00449467	0.00240104	0.898501
SMAD7	0	0	5.13999e-10	9.48933e-258	0.932302	0.491807	0.0602314	0.002033	0.0612634	-0.00249338	0.00133221	0.898501
TMEM14C	0	0	5.33852e-10	9.43034e-258	0.927248	0.491516	0.0618523	0.00198245	0.0612913	-0.00312588	0.00167034	0.898501
NKX6-3	0	0	5.00539e-10	9.36915e-258	0.925877	0.494343	0.0609922	0.00209647	0.061301	0.00300821	0.00160752	0.898501
LRRIQ3	0	0	5.32334e-10	9.74457e-258	0.934805	0.494326	0.0611796	0.00195908	0.0614261	-0.00152852	0.000817201	0.899254
ETV6	0	0	4.98899e-10	6.70911e-258	0.929854	0.501081	0.0608892	0.00218558	0.0614494	0.00199678	0.00106765	0.899254
KIF2A	0	0	5.13568e-10	6.75239e-258	0.935581	0.49419	0.0618441	0.00211032	0.0615106	-0.0030905	0.00165283	0.899296
ACYP1	0	0	5.31157e-10	5.7907e-258	0.919608	0.496508	0.0602978	0.0020504	0.0616166	-0.00684079	0.00366002	0.899296
CUBN	0	0	5.1096e-10	8.02654e-258	0.937435	0.496294	0.0596885	0.00224973	0.0616759	0.000508536	0.000272143	0.899296
ZFAND3	0	0	5.30861e-10	9.06698e-258	0.927274	0.499015	0.0607252	0.00204626	0.0616859	-0.00357179	0.00191152	0.899296
ACCS	0	0	5.4439e-10	8.65388e-258	0.925717	0.493595	0.0606495	0.00200303	0.061699	-0.00220273	0.0011789	0.899296
RYR3	0	0	5.23231e-10	5.58891e-258	0.920472	0.490784	0.0607224	0.00195728	0.061743	0.000491949	0.000263335	0.899296
PDLIM2	0	0	5.16976e-10	5.6931e-258	0.929764	0.493995	0.0612713	0.0019677	0.0618668	0.00141632	0.000758498	0.900392
AMER3	0	0	5.21692e-10	1.29814e-257	0.92608	0.49997	0.0606178	0.00212171	0.0619308	0.00240242	0.00128691	0.900617
HAPLN2	0	0	5.38158e-10	6.90533e-258	0.932151	0.492317	0.0616908	0.00202813	0.0620226	-0.00250816	0.00134403	0.901246
ERAL1	0	0	5.32636e-10	9.50493e-258	0.927262	0.494795	0.061006	0.00196258	0.0620992	-0.00282779	0.00151575	0.901545
SPINT2	0	0	5.16753e-10	8.37684e-258	0.924481	0.492421	0.0609192	0.00188185	0.0621404	-0.00251807	0.00134995	0.901545
PPP1R3G	0	0	5.06593e-10	6.4032e-258	0.925188	0.493619	0.0598644	0.00211565	0.0622372	-0.00331604	0.0017784	0.902246
CEPT1	0	0	5.20692e-10	7.49983e-258	0.932307	0.494177	0.0610339	0.00197165	0.0623675	0.00224751	0.00120595	0.902253
SLC27A4	0	0	5.2473e-10	8.65059e-258	0.924895	0.492159	0.0604567	0.00212479	0.0623711	0.00142639	0.000765367	0.902253
SON	0	0	5.13709e-10	7.72816e-258	0.929177	0.490647	0.0612892	0.00202908	0.0624473	-0.00101919	0.000547035	0.902253
ZNF260	0	0	5.30914e-10	9.92174e-258	0.925624	0.4927	0.0610515	0.00208984	0.0625017	-0.00282035	0.00151409	0.902253
MARCKSL1	0	0	5.30979e-10	7.77126e-258	0.921474	0.493593	0.0601528	0.0021323	0.0625665	0.0054271	0.00291423	0.902253
SLC9A3R1	0	0	5.3516e-10	7.6197e-258	0.926445	0.49905	0.0616453	0.00204555	0.0625812	0.000878449	0.000471734	0.902253
LHX8	0	0	5.25058e-10	7.32585e-258	0.929084	0.501655	0.0607026	0.00205023	0.0626189	-0.00202847	0.00108946	0.902253
ZMYM1	0	0	5.34009e-10	6.67402e-258	0.932538	0.490901	0.0604949	0.00214266	0.0626268	0.00241658	0.00129795	0.902253
LAPTM5	0	0	5.22549e-10	7.95239e-258	0.921647	0.494367	0.0610815	0.00214406	0.0627718	-0.00157295	0.000845298	0.902461
SLC25A46	0	0	5.19729e-10	7.24996e-258	0.927929	0.490761	0.0613487	0.00204771	0.0627741	0.00190018	0.00102116	0.902461
ZNF85	0	0	5.09398e-10	8.58495e-258	0.926343	0.495718	0.0610164	0.00207004	0.0628305	-0.00247414	0.0013299	0.902461
GHSR	0	0	5.52845e-10	7.72087e-258	0.928132	0.498213	0.0601905	0.00208923	0.0628916	0.00238493	0.00128224	0.902461
A1CF	0	0	5.01157e-10	7.73075e-258	0.934428	0.489097	0.0608191	0.00203164	0.0629131	0.00143298	0.000770493	0.902461
KRT27	0	0	4.82041e-10	8.14155e-258	0.927361	0.488612	0.0608542	0.00216138	0.0629471	0.0011184	0.000601428	0.902461
STRADB	0	0	5.14424e-10	8.76365e-258	0.9213	0.498143	0.0618321	0.00202541	0.0629947	-0.00322055	0.00173218	0.902461
NXN	0	0	5.20085e-10	7.31284e-258	0.925409	0.4986	0.0612548	0.00205917	0.063122	-0.0023812	0.00128136	0.902461
TPBG	0	0	5.37612e-10	1.06856e-257	0.929311	0.492099	0.0622998	0.00209901	0.0631483	-0.00233918	0.00125887	0.902461
PPP1R7	0	0	5.26602e-10	7.44804e-258	0.927637	0.500227	0.0612919	0.00195815	0.0632595	-0.00231089	0.00124417	0.902461
KCNJ3	0	0	5.25696e-10	6.7888e-258	0.929475	0.48986	0.0599409	0.00198454	0.063304	-0.00680535	0.00366458	0.902461
FAM71E1	0	0	5.56528e-10	6.61172e-258	0.93176	0.491271	0.0615245	0.00221067	0.0633436	0.00115374	0.000621361	0.902461
SUCNR1	0	0	4.7858e-10	1.19098e-257	0.925582	0.494637	0.0611616	0.00208687	0.0633519	0.00430105	0.00231647	0.902461
TMEM26	0	0	5.58258e-10	5.38747e-258	0.93216	0.492705	0.0623847	0.00207262	0.0633821	-0.00268545	0.0014465	0.902461
ARHGAP24	0	0	5.34828e-10	7.46064e-258	0.91501	0.493573	0.0626828	0.0020057	0.0635035	-0.00140352	0.000756347	0.902461
ESR2	0	0	5.23931e-10	8.02249e-258	0.923152	0.496505	0.0596077	0.00199228	0.0635203	-0.00133902	0.000721629	0.902461
ANKRD11	0	0	5.2058e-10	7.57402e-258	0.918242	0.491613	0.0624015	0.00205931	0.0635534	-0.000971681	0.000523729	0.902461
TOMM70	0	0	5.05876e-10	7.6442e-258	0.921897	0.492858	0.0605343	0.00212432	0.0635573	-0.00172087	0.000927548	0.902461
SLC2A8	0	0	5.85484e-10	5.27805e-258	0.932365	0.49429	0.0603491	0.00217745	0.0637737	0.00121062	0.000653056	0.902461
MAP4K3	0	0	5.28119e-10	7.97775e-258	0.928709	0.491837	0.0597041	0.00209566	0.0638146	0.00109437	0.000590441	0.902461
SMIM21	0	0	5.31086e-10	9.82557e-258	0.92955	0.490989	0.0601461	0.00207566	0.0638831	0.0123787	0.00668033	0.902461
COX8A	0	0	5.53216e-10	1.08848e-257	0.922686	0.496637	0.0609632	0.00206409	0.0639936	0.00774376	0.00418076	0.902461
OR2Z1	0	0	5.23217e-10	9.43937e-258	0.935288	0.494087	0.0614914	0.00213332	0.0640075	0.0038446	0.00207576	0.902461
FUT3	0	0	5.56153e-10	7.3303e-258	0.927707	0.490475	0.0616658	0.0019733	0.0640268	-0.00293789	0.00158633	0.902461
MMP27	0	0	5.48557e-10	7.04143e-258	0.92766	0.492718	0.0620945	0.00204952	0.0640934	-0.00105954	0.000572249	0.902461
ZNF720	0	0	5.32938e-10	1.13596e-257	0.923345	0.492352	0.0607532	0.0020713	0.0641836	0.00778961	0.00420852	0.902461
TTC9B	0	0	5.16249e-10	6.96395e-258	0.925619	0.492479	0.0600613	0.00216472	0.0642235	-0.00403799	0.00218194	0.902461
ZNF282	0	0	4.96801e-10	7.13656e-258	0.930977	0.494752	0.0622103	0.00213562	0.0642292	0.00172718	0.000933306	0.902461
FAIM	0	0	5.07492e-10	7.40703e-258	0.926525	0.489462	0.0592687	0.0021648	0.0642776	0.00379698	0.00205213	0.902461
UCHL1	0	0	5.08943e-10	5.57028e-258	0.925203	0.498132	0.0599437	0.00217501	0.0642912	-0.00627353	0.00339079	0.902461
FEM1C	0	0	5.13268e-10	6.1577e-258	0.926058	0.49008	0.0594473	0.00214957	0.064319	-0.00501469	0.00271068	0.902461
HDAC7	0	0	5.12269e-10	1.07446e-257	0.922088	0.48953	0.0616738	0.00215609	0.0643518	-0.00118692	0.000641663	0.902461
CDH8	0	0	4.97369e-10	9.48475e-258	0.931605	0.494244	0.0620097	0.00192272	0.0643582	-0.00103855	0.000561469	0.902461
ANAPC15	0	0	5.34604e-10	1.1492e-257	0.924723	0.497503	0.0616753	0.00205807	0.0644095	-0.00638674	0.00345351	0.902461
POLG2	0	0	5.28503e-10	4.99584e-258	0.928514	0.495099	0.0620683	0.00214655	0.0644503	0.00239094	0.00129305	0.902461
ELMOD2	0	0	5.22056e-10	6.09106e-258	0.924836	0.495577	0.06057	0.00207385	0.064574	-0.00307877	0.00166581	0.902461
PSMD13	0	0	4.89536e-10	7.89856e-258	0.925856	0.492861	0.0607284	0.00220969	0.0647125	0.0014313	0.000774827	0.902461
LCE1F	0	0	5.29936e-10	6.6461e-258	0.925438	0.49799	0.0601186	0.00206312	0.0647792	-0.010385	0.00562327	0.902461
RNFT1	0	0	5.16184e-10	7.42464e-258	0.924406	0.494872	0.0605542	0.00215008	0.0648176	-0.00159459	0.00086356	0.902461
KLHL31	0	0	5.1946e-10	8.50395e-258	0.928772	0.489899	0.0616386	0.00218351	0.0648999	0.00128712	0.000697262	0.902461
SPATA5L1	0	0	5.05058e-10	6.67269e-258	0.930034	0.491945	0.061106	0.00227181	0.0649219	-0.00145171	0.000786491	0.902461
TRIP11	0	0	5.3735e-10	8.59269e-258	0.929556	0.497312	0.0601598	0.00234343	0.0649543	-0.000694229	0.000376156	0.902461
MKRN3	0	0	5.19749e-10	9.97077e-258	0.925051	0.494445	0.0613187	0.00211517	0.0649713	-0.00312393	0.00169276	0.902461
PRM2	0	0	5.10773e-10	8.84833e-258	0.922998	0.497036	0.0614215	0.00204832	0.0649736	-0.00679139	0.00368007	0.902461
ABHD8	0	0	5.23129e-10	1.07566e-257	0.932493	0.495675	0.0598661	0.00218111	0.0649845	-0.00144251	0.000781688	0.902461
SLC25A30	0	0	5.33003e-10	7.31704e-258	0.931263	0.495223	0.0619157	0.00194419	0.0649852	0.00137155	0.000743235	0.902461
MAGEB6	0	0	5.26189e-10	8.61864e-258	0.924852	0.495779	0.0613345	0.00206185	0.0649969	-0.00650739	0.00352648	0.902461
MORN1	0	0	5.29507e-10	8.52232e-258	0.92119	0.4948	0.061028	0.00198636	0.0650118	-0.00131439	0.000712332	0.902461
CAB39L	0	0	5.33769e-10	9.34389e-258	0.930779	0.496912	0.0602775	0.00205031	0.0650962	0.00208149	0.00112842	0.902461
CAMKK2	0	0	5.1709e-10	7.65029e-258	0.926692	0.496594	0.0608704	0.00204375	0.065119	0.00168641	0.000914312	0.902461
HOXA3	0	0	5.80372e-10	9.13563e-258	0.921244	0.49436	0.0612603	0.00201831	0.0651237	0.00334794	0.00181517	0.902461
BMP1	0	0	5.19728e-10	7.24567e-258	0.930975	0.496022	0.0616037	0.00214915	0.0653917	0.00081886	0.000444408	0.902461
CDIP1	0	0	5.22375e-10	9.93179e-258	0.924928	0.499498	0.0624231	0.00196222	0.0654512	0.00366957	0.00199197	0.902461
BCL2L11	0	0	5.5013e-10	9.15923e-258	0.928807	0.495639	0.0609699	0.00213685	0.0654681	0.00331208	0.00179803	0.902461
CNRIP1	0	0	5.4736e-10	7.15359e-258	0.929399	0.496151	0.0614639	0.0020649	0.0654883	0.00311786	0.00169272	0.902461
EIF2B4	0	0	5.39339e-10	6.52587e-258	0.931141	0.492725	0.0618016	0.00214805	0.0654968	0.00251566	0.00136582	0.902461
CCAR1	0	0	5.24958e-10	8.98832e-258	0.924836	0.496128	0.0602131	0.00206968	0.0655038	-0.00234006	0.00127052	0.902461
EMC7	0	0	5.10329e-10	8.57719e-258	0.926608	0.49342	0.0614336	0.00209171	0.0655072	-0.00113232	0.000614791	0.902461
MYT1L	0	0	5.2373e-10	1.16438e-257	0.927189	0.487095	0.0620279	0.00200076	0.065584	-0.00234187	0.00127188	0.902461
SLC12A7	0	0	5.19552e-10	7.38176e-258	0.929346	0.491055	0.0605921	0.00203215	0.065606	0.0010555	0.00057329	0.902461
CELF3	0	0	5.38727e-10	5.92687e-258	0.923027	0.49509	0.0606046	0.00198996	0.0656151	-0.00351152	0.00190734	0.902461
DGKB	0	0	5.15698e-10	1.14471e-257	0.923229	0.496159	0.0622263	0.00204593	0.0656666	-0.0017307	0.000940236	0.902461
GPBP1	0	0	5.36597e-10	6.89762e-258	0.929892	0.497724	0.0610415	0.00205637	0.0658843	0.00333072	0.00181094	0.902461
HNRNPR	0	0	5.18361e-10	6.9465e-258	0.931871	0.497332	0.0602351	0.00210313	0.0659278	-0.00447569	0.00243386	0.902461
CEP170	0	0	5.32728e-10	8.5475e-258	0.92346	0.500409	0.0613062	0.00211159	0.0659672	-0.000991884	0.00053946	0.902461
GPR143	0	0	5.11702e-10	7.22251e-258	0.929889	0.492177	0.0610769	0.00206905	0.0659854	-0.00621129	0.00337839	0.902461
PARVB	0	0	5.30257e-10	6.51803e-258	0.932915	0.493973	0.0607277	0.00215538	0.0661036	0.00163954	0.000892155	0.902461
PDK2	0	0	5.24937e-10	7.1889e-258	0.931725	0.486818	0.0623289	0.00198507	0.0661431	-0.00283357	0.00154211	0.902461
GTF3C3	0	0	5.33886e-10	8.64756e-258	0.926743	0.494145	0.0619882	0.00212851	0.0662158	0.00206585	0.0011246	0.902461
NPY	0	0	5.30971e-10	5.63343e-258	0.926378	0.492403	0.061431	0.00206748	0.0662212	0.00410872	0.00223672	0.902461
SCAF1	0	0	5.296e-10	9.37372e-258	0.924175	0.497643	0.0603729	0.00209418	0.0662826	-0.00118904	0.00064744	0.902461
GTF3C2	0	0	5.18544e-10	7.90464e-258	0.929629	0.493163	0.0615737	0.0021036	0.0662832	0.00236252	0.00128641	0.902461
OR6K3	0	0	5.23427e-10	9.64905e-258	0.919513	0.494221	0.0617321	0.00210268	0.0663759	0.00353031	0.00192294	0.902461
PNPLA2	0	0	5.27113e-10	8.90124e-258	0.931928	0.493189	0.0611029	0.00203606	0.0665168	0.00155205	0.000845831	0.902461
ABCG8	0	0	5.3667e-10	7.92336e-258	0.932715	0.490914	0.0611919	0.00205648	0.0665283	0.000892681	0.000486511	0.902461
HLA-DRB1	0	0	5.01122e-10	8.75081e-258	0.938313	0.494096	0.0600026	0.00204713	0.0665556	0.00200455	0.00109259	0.902461
UBE3C	0	0	5.18314e-10	9.95464e-258	0.928693	0.49171	0.0596019	0.00205589	0.0665558	-0.00203973	0.00111177	0.902461
AKAP7	0	0	5.55374e-10	8.24463e-258	0.929829	0.492102	0.0603967	0.00211441	0.0665913	0.00180251	0.000982594	0.902461
ZNF585A	0	0	5.44754e-10	8.69758e-258	0.921565	0.495337	0.0604236	0.00214242	0.066602	-0.00210472	0.00114738	0.902461
KRTAP10-9	0	0	4.94482e-10	7.2169e-258	0.9309	0.498819	0.0605621	0.00212291	0.0667376	-0.00299739	0.00163483	0.902461
PTCRA	0	0	5.31134e-10	8.33368e-258	0.930852	0.49402	0.0608282	0.00197081	0.066743	-0.00178786	0.000975151	0.902461
SOX30	0	0	5.15167e-10	6.87078e-258	0.926662	0.494149	0.0612741	0.00196111	0.0667485	0.00119307	0.000650752	0.902461
FNIP2	0	0	5.1226e-10	6.20149e-258	0.924028	0.497827	0.0605244	0.00208012	0.0668233	-0.00158221	0.000863242	0.902461
PPP1R8	0	0	5.25668e-10	7.60362e-258	0.925787	0.491917	0.0629816	0.00202365	0.0668764	0.00653515	0.00356621	0.902461
FCGR3A	0	0	5.31749e-10	7.50785e-258	0.916544	0.494867	0.0603426	0.00208783	0.0668836	-0.00252923	0.00138023	0.902461
ATRAID	0	0	5.07792e-10	7.34085e-258	0.923503	0.493894	0.0620042	0.00200582	0.0669047	-0.00149601	0.000816453	0.902461
CYB5D2	0	0	4.94509e-10	8.00137e-258	0.929387	0.500556	0.0621481	0.00210692	0.0669353	0.00219664	0.00119896	0.902461
RAB3A	0	0	5.59127e-10	7.33897e-258	0.930562	0.497244	0.06145	0.0020734	0.0671224	0.00434359	0.00237242	0.902461
OPN4	0	0	5.26113e-10	9.42329e-258	0.936101	0.494174	0.0622531	0.00213763	0.0671291	-0.00116916	0.000638601	0.902461
HCST	0	0	5.43192e-10	8.24774e-258	0.930016	0.490362	0.0617161	0.00213362	0.0671988	0.00300165	0.00163993	0.902461
CCDC58	0	0	5.15058e-10	6.49463e-258	0.929282	0.490564	0.0620396	0.00198046	0.0672631	-0.00408311	0.0022313	0.902461
GNB5	0	0	5.08861e-10	9.69642e-258	0.929683	0.493854	0.0610746	0.00205433	0.0673187	0.00174487	0.000953713	0.902461
SBF1	0	0	5.08969e-10	7.14361e-258	0.927735	0.494099	0.0598822	0.0022689	0.0673268	0.000696749	0.000380841	0.902461
WDR83OS	0	0	5.14492e-10	8.68351e-258	0.930045	0.493249	0.0606281	0.00212167	0.0675195	0.00463774	0.00253676	0.902461
TMPRSS7	0	0	5.05316e-10	7.22271e-258	0.926694	0.495133	0.0605793	0.00220667	0.0675202	-0.000754897	0.000412916	0.902461
EXOSC7	0	0	5.12364e-10	7.17215e-258	0.9315	0.49429	0.0609796	0.00204966	0.0675487	-0.00218686	0.0011963	0.902461
CDHR2	0	0	5.36045e-10	9.03673e-258	0.928511	0.491353	0.061641	0.00206315	0.0676718	0.0008773	0.000480133	0.902461
OR14A16	0	0	5.34947e-10	8.05583e-258	0.924262	0.497309	0.0600468	0.00202273	0.0677028	0.00469116	0.0025677	0.902461
PITRM1	0	0	5.41382e-10	8.82643e-258	0.93152	0.497981	0.0607458	0.00207785	0.0677641	0.000834585	0.00045691	0.902461
CETP	0	0	5.12199e-10	8.55097e-258	0.921348	0.493309	0.0619358	0.002005	0.0677835	-0.00241885	0.00132434	0.902461
MAPK1IP1L	0	0	5.21056e-10	8.53402e-258	0.935688	0.493581	0.0604435	0.00215514	0.0677926	-0.00447195	0.00244851	0.902461
AIFM3	0	0	5.21764e-10	1.04973e-257	0.927338	0.492201	0.0620533	0.00203109	0.0678445	-0.000751132	0.000411342	0.902461
SGCA	0	0	5.43873e-10	8.05336e-258	0.926708	0.492189	0.0607183	0.00207319	0.0678679	-0.00160124	0.00087696	0.902461
ORMDL1	0	0	5.0317e-10	8.61024e-258	0.926396	0.494488	0.0614695	0.00200962	0.0679385	-0.00402337	0.00220407	0.902461
TSC2	0	0	5.44973e-10	7.26285e-258	0.933506	0.504536	0.0605666	0.00221692	0.0679407	-0.00070986	0.000388876	0.902461
ZBTB10	0	0	5.08961e-10	8.85675e-258	0.920609	0.498629	0.0597194	0.00201228	0.0679476	-0.0014988	0.000821096	0.902461
COX11	0	0	5.41027e-10	7.68744e-258	0.924141	0.494333	0.0615925	0.00208464	0.0679507	-0.00523836	0.00286979	0.902461
JPH1	0	0	5.11675e-10	7.22861e-258	0.931948	0.497218	0.0607703	0.00212822	0.0679529	0.00213209	0.00116805	0.902461
ZNF668	0	0	4.91849e-10	6.05461e-258	0.92771	0.48831	0.0622074	0.00208889	0.0679602	-0.00245537	0.0013452	0.902461
CLCN6	0	0	5.09673e-10	9.36762e-258	0.924695	0.492376	0.060935	0.00204161	0.0680232	0.00136022	0.000745382	0.902461
AKT2	0	0	5.49105e-10	7.84501e-258	0.927347	0.49225	0.0604773	0.00202385	0.068092	-0.00223081	0.00122276	0.902461
P4HA1	0	0	5.06098e-10	7.0046e-258	0.933104	0.492753	0.0609576	0.00230206	0.0681502	-0.00205079	0.00112432	0.902461
MCU	0	0	5.10761e-10	8.48788e-258	0.927386	0.495142	0.0598997	0.00210391	0.0681876	0.00219368	0.00120282	0.902461
RPEL1	0	0	5.50471e-10	6.49666e-258	0.927825	0.488498	0.0612823	0.00196045	0.0682154	-0.00124826	0.000684504	0.902461
TENM2	0	0	5.25538e-10	6.46011e-258	0.924429	0.492682	0.0608194	0.00198547	0.0682342	-0.000583066	0.000319756	0.902461
ANKRD27	0	0	5.58759e-10	6.07356e-258	0.932949	0.491116	0.0621269	0.00217719	0.0683439	0.000823911	0.000452016	0.903269
RET	0	0	5.10835e-10	9.75299e-258	0.925886	0.493637	0.0605918	0.0020439	0.0684527	0.00166661	0.000914703	0.904063
DHPS	0	0	5.13487e-10	8.17058e-258	0.93901	0.499569	0.0597851	0.00204164	0.0687369	0.00240833	0.00132314	0.905747
CTDSPL2	0	0	5.33773e-10	8.77412e-258	0.931448	0.488951	0.0608678	0.00212091	0.0687494	-0.00430111	0.00236315	0.905747
BRAF	0	0	5.15272e-10	8.25173e-258	0.92676	0.495074	0.059953	0.00209721	0.0687707	0.00404692	0.00222366	0.905747
CARD14	0	0	5.20076e-10	1.12731e-257	0.927171	0.491846	0.0607649	0.00215493	0.0687815	0.00109036	0.000599142	0.905747
SPPL2A	0	0	5.36093e-10	8.16833e-258	0.922681	0.494994	0.060461	0.00215882	0.0688243	-0.00144063	0.000791736	0.905747
OR4C13	0	0	4.81634e-10	7.87329e-258	0.928655	0.490627	0.0619142	0.00190199	0.0688731	-0.00153221	0.000842215	0.905747
NTRK2	0	0	5.25898e-10	8.96721e-258	0.929429	0.490872	0.0611669	0.00210016	0.0689922	-0.00220374	0.00121186	0.906309
MED21	0	0	5.09452e-10	6.19248e-258	0.933989	0.49528	0.0614647	0.00202242	0.0690135	0.00396865	0.00218256	0.906309
OTUD7B	0	0	5.28662e-10	6.63684e-258	0.927059	0.497474	0.0611046	0.00209807	0.069065	-0.00117119	0.000644216	0.906344
IFNGR2	0	0	5.19599e-10	7.15815e-258	0.920962	0.490872	0.0609981	0.00194678	0.0692017	-0.0038023	0.00209249	0.906981
ARAP3	0	0	5.42958e-10	9.37142e-258	0.924341	0.492937	0.061002	0.00202894	0.0692736	0.00084645	0.000465941	0.906981
TRRAP	0	0	5.48821e-10	8.65886e-258	0.924015	0.48898	0.0598645	0.00208939	0.0692763	-0.00112346	0.000618432	0.906981
RP9	0	0	5.16596e-10	7.41952e-258	0.933766	0.498715	0.0612658	0.00212783	0.0693091	0.00423731	0.00233279	0.906981
FIBIN	0	0	5.38638e-10	5.59962e-258	0.919202	0.494438	0.0600212	0.00211483	0.0694872	0.00121792	0.000670937	0.908671
OR2A14	0	0	5.15292e-10	7.45078e-258	0.918509	0.496298	0.0610572	0.00204822	0.0698606	-0.0024705	0.00136279	0.912903
GPATCH3	0	0	5.20386e-10	8.80799e-258	0.926281	0.492245	0.0608975	0.00214968	0.0699092	0.00130233	0.000718524	0.912903
TMEM185B	0	0	5.36457e-10	8.68957e-258	0.928194	0.498508	0.0601714	0.00211238	0.0701565	0.0026501	0.00146341	0.914048
TASP1	0	0	5.12769e-10	7.14506e-258	0.928976	0.489465	0.0612958	0.00206882	0.0701604	-0.00465034	0.00256799	0.914048
FBXW4	0	0	5.30039e-10	8.39182e-258	0.930353	0.497588	0.0608887	0.00214083	0.0702003	0.00211925	0.00117045	0.914048
ZFHX2	0	0	5.14181e-10	8.00433e-258	0.928755	0.490452	0.0615025	0.00210422	0.0702472	-0.000942906	0.000520848	0.914048
C14orf177	0	0	5.13372e-10	7.30255e-258	0.92601	0.49259	0.0604416	0.00202053	0.0703104	-0.00644001	0.00355818	0.914048
VDAC3	0	0	5.46461e-10	7.58314e-258	0.922526	0.493754	0.0605998	0.00219337	0.0703509	-0.00149853	0.000828073	0.914048
CHD4	0	0	5.37897e-10	1.13843e-257	0.923883	0.497447	0.0615516	0.00213506	0.0703949	0.00222274	0.00122846	0.914048
TXNL1	0	0	5.33164e-10	6.29719e-258	0.930464	0.494453	0.0595864	0.00204251	0.0704445	-0.00410209	0.00226753	0.914048
GID4	0	0	5.20405e-10	7.3698e-258	0.923613	0.493796	0.0603624	0.00208246	0.070466	-0.00579217	0.00320201	0.914048
CFAP52	0	0	5.22842e-10	6.3639e-258	0.930536	0.487467	0.0617749	0.00200149	0.0704895	-0.00101409	0.000560651	0.914048
SOS1	0	0	5.05305e-10	6.75241e-258	0.932625	0.493903	0.060075	0.00212969	0.0706218	0.00198072	0.00109558	0.915124
RTN4IP1	0	0	5.11888e-10	1.19345e-257	0.929234	0.489497	0.0607612	0.00210773	0.070815	0.00212834	0.00117804	0.915242
EIF2AK4	0	0	5.36612e-10	7.57564e-258	0.935483	0.492428	0.0600605	0.00201468	0.0708652	-0.0010572	0.000585266	0.915242
SRSF6	0	0	5.24996e-10	9.29606e-258	0.930235	0.495504	0.0603017	0.00198738	0.0708725	-0.00315205	0.00174502	0.915242
COPB2	0	0	5.28273e-10	7.93831e-258	0.925879	0.494611	0.060711	0.00212464	0.0709132	0.00196118	0.0010859	0.915242
SLC30A6	0	0	5.2991e-10	8.80472e-258	0.932322	0.495221	0.0601816	0.00211148	0.0709741	0.00299405	0.00165815	0.915242
HNRNPA0	0	0	5.19007e-10	7.9551e-258	0.930082	0.493125	0.0609708	0.0020485	0.0711206	-0.00900557	0.00499001	0.915242
CSN3	0	0	5.37525e-10	7.88884e-258	0.924315	0.500362	0.0614373	0.00215241	0.0711672	0.00747721	0.00414383	0.915242
CKAP2	0	0	5.06018e-10	6.60092e-258	0.923671	0.496905	0.0601673	0.00208457	0.0711753	-0.00124042	0.000687452	0.915242
COX14	0	0	5.71901e-10	1.05773e-257	0.926608	0.495593	0.0609009	0.00196568	0.0711825	-0.00460731	0.00255348	0.915242
ARMCX6	0	0	5.09081e-10	9.08218e-258	0.92496	0.493774	0.0605196	0.00208542	0.0712264	-0.00495926	0.00274897	0.915242
SOAT2	0	0	5.32655e-10	1.10563e-257	0.928412	0.497837	0.0604361	0.00194439	0.071283	0.0010218	0.000566509	0.915242
ARV1	0	0	5.3297e-10	7.70871e-258	0.932949	0.493666	0.0623131	0.00186143	0.0713061	0.00148277	0.000822146	0.915242
CRCT1	0	0	4.81592e-10	7.06255e-258	0.924946	0.493058	0.0621103	0.00205804	0.0715073	-0.00915512	0.00507981	0.915242
NECAP2	0	0	5.27117e-10	8.13507e-258	0.930135	0.490138	0.0603896	0.00237208	0.0716078	-0.00144219	0.000800497	0.915242
CIZ1	0	0	5.58087e-10	7.53597e-258	0.933513	0.49612	0.0610141	0.00198426	0.0716715	-0.00280661	0.00155818	0.915242
QTRT2	0	0	5.07044e-10	8.3069e-258	0.930243	0.492377	0.0612713	0.00208655	0.0717024	-0.00165855	0.000920895	0.915242
C8orf37	0	0	5.42735e-10	8.12578e-258	0.934395	0.495046	0.0610548	0.00195593	0.0717394	-0.00426033	0.00236582	0.915242
CTNS	0	0	5.06958e-10	8.5956e-258	0.931304	0.494503	0.0599557	0.00228651	0.0717742	-0.00163356	0.00090725	0.915242
PHOX2B	0	0	5.30454e-10	7.30673e-258	0.935408	0.491625	0.0612516	0.00209438	0.0717869	0.00766532	0.00425738	0.915242
TMED3	0	0	5.29616e-10	7.35476e-258	0.927642	0.493705	0.0613501	0.00197933	0.0718368	0.00152057	0.000844683	0.915242
DNAJC27	0	0	5.62569e-10	8.37234e-258	0.924979	0.496288	0.0612059	0.00203059	0.0718408	0.00229842	0.0012768	0.915242
TRA2B	0	0	5.25788e-10	7.41196e-258	0.933006	0.491455	0.0606474	0.00203587	0.0718736	-0.00726758	0.0040377	0.915242
LGI3	0	0	5.51895e-10	8.19002e-258	0.928827	0.487871	0.0602546	0.00207827	0.0718945	-0.00172101	0.000956221	0.915242
C1RL	0	0	5.10341e-10	9.12853e-258	0.928641	0.493628	0.060401	0.00222005	0.0719049	-0.0020378	0.00113228	0.915242
TMCO3	0	0	5.71988e-10	7.78773e-258	0.926	0.493858	0.0617739	0.00209254	0.0719175	-0.00200656	0.00111497	0.915242
BRD7	0	0	5.21607e-10	7.37186e-258	0.929536	0.497198	0.0604748	0.00220004	0.0719558	0.00206005	0.00114485	0.915242
HAAO	0	0	5.00222e-10	7.40887e-258	0.928345	0.497121	0.0613991	0.00203241	0.0719626	-0.00119639	0.000664894	0.915242
RWDD2A	0	0	5.39021e-10	7.74803e-258	0.917928	0.492544	0.0613128	0.0020315	0.0720374	-0.00354789	0.00197226	0.915566
TMEM18	0	0	5.4576e-10	1.07378e-257	0.931783	0.495781	0.0607765	0.00209853	0.0721525	0.0023	0.00127908	0.916401
ANKRD13D	0	0	5.26736e-10	8.31023e-258	0.928385	0.496801	0.0623469	0.00205144	0.072232	-0.00187922	0.00104537	0.916547
KRTAP9-8	0	0	5.54545e-10	8.74413e-258	0.924818	0.4922	0.0622371	0.00192967	0.0722936	0.00381471	0.00212249	0.916547
TRUB1	0	0	5.44887e-10	7.49995e-258	0.919036	0.496128	0.0597781	0.00201152	0.0723792	-0.00270339	0.00150461	0.916547
FANCB	0	0	5.55458e-10	7.88339e-258	0.931692	0.495626	0.0604851	0.00210096	0.0723932	-0.00491944	0.00273812	0.916547
RNASE8	0	0	5.2595e-10	7.02338e-258	0.933421	0.493132	0.060783	0.00207109	0.072411	0.0102415	0.0057007	0.916547
DUSP5	0	0	5.29822e-10	1.07576e-257	0.944269	0.490939	0.0600135	0.00202775	0.0725773	0.00155966	0.000868655	0.917172
LRIT1	0	0	5.48435e-10	8.56915e-258	0.933416	0.490157	0.0604417	0.00211906	0.0725914	0.00157774	0.000878768	0.917172
APP	0	0	5.1214e-10	7.85649e-258	0.930291	0.495299	0.0613008	0.00203101	0.0726086	0.00153032	0.000852407	0.917172
SYNE3	0	0	5.02611e-10	1.08044e-257	0.929072	0.496521	0.0611522	0.0021606	0.0727216	-0.00150842	0.000840539	0.917531
RASGRP3	0	0	5.32097e-10	7.78766e-258	0.925565	0.499724	0.0604896	0.00212423	0.0728065	-0.00103416	0.000576438	0.917531
SFTPB	0	0	5.19831e-10	8.91075e-258	0.928927	0.494301	0.0611531	0.00204423	0.0728503	-0.00278021	0.00154992	0.917531
HOOK2	0	0	5.7491e-10	9.17978e-258	0.930733	0.494079	0.0618627	0.00201309	0.0728933	-0.0012108	0.000675098	0.917531
DRC1	0	0	5.42058e-10	6.43802e-258	0.918762	0.491849	0.0617625	0.00209702	0.0729579	-0.000893555	0.000498328	0.917531
RCN2	0	0	5.08927e-10	8.71542e-258	0.928676	0.491136	0.0621276	0.00214719	0.0730101	0.00242698	0.00135375	0.917531
GCSAM	0	0	5.54891e-10	1.15589e-257	0.930736	0.496779	0.0616589	0.00205718	0.0730387	0.0063025	0.00351584	0.917531
ARIH2	0	0	5.33218e-10	9.93735e-258	0.924955	0.494495	0.0614619	0.00213483	0.0730394	-0.00396907	0.00221414	0.917531
CYP2F1	0	0	4.97511e-10	8.62171e-258	0.926399	0.494617	0.0612027	0.0021031	0.0730821	-0.00140931	0.000786301	0.917531
MYH11	0	0	5.12421e-10	7.84662e-258	0.924048	0.503913	0.0608825	0.00204667	0.073219	-0.000564685	0.000315207	0.918628
CUL2	0	0	5.35334e-10	9.14664e-258	0.925156	0.494961	0.0609232	0.00202735	0.0733509	0.00165986	0.000926958	0.919149
TLR8	0	0	5.40951e-10	6.63395e-258	0.924089	0.493461	0.0615407	0.00206883	0.0733595	0.00482609	0.00269524	0.919149
GALNT7	0	0	5.15644e-10	7.59638e-258	0.927812	0.496308	0.0610571	0.00198978	0.0734642	-0.00132886	0.000742401	0.919839
CAP1	0	0	5.63575e-10	8.94622e-258	0.927427	0.497187	0.060573	0.00203967	0.0735177	0.00224591	0.00125497	0.919888
RAB2A	0	0	5.25818e-10	5.44085e-258	0.927844	0.491767	0.0620459	0.00204273	0.0736298	0.0112875	0.00630968	0.920606
TRAF6	0	0	5.55185e-10	5.66122e-258	0.924432	0.495127	0.0617519	0.00198814	0.0737189	0.003993	0.00223276	0.920606
BRDT	0	0	5.14864e-10	7.95032e-258	0.921393	0.495086	0.0607101	0.00209905	0.0739511	0.00144368	0.00080791	0.920606
IFNA13	0	0	5.46552e-10	9.01289e-258	0.921227	0.49319	0.060679	0.00202139	0.0740964	-0.0036623	0.00205053	0.920606
TBC1D2B	0	0	5.30931e-10	9.21957e-258	0.922358	0.487572	0.0606766	0.00197949	0.0741299	-0.00163951	0.00091807	0.920606
IST1	0	0	5.27872e-10	7.60117e-258	0.926537	0.496316	0.0613267	0.00212773	0.07415	0.00293272	0.00164234	0.920606
KDELR1	0	0	5.26692e-10	7.2549e-258	0.9229	0.491372	0.0630612	0.00212244	0.0741506	0.00556734	0.00311774	0.920606
COMMD8	0	0	5.67553e-10	7.18822e-258	0.929975	0.499801	0.0610299	0.00215355	0.0741713	-0.00217601	0.00121867	0.920606
NUCKS1	0	0	5.39322e-10	7.12041e-258	0.92708	0.49489	0.0610743	0.00201916	0.0742446	0.00395139	0.00221352	0.920606
NRROS	0	0	5.0882e-10	8.6247e-258	0.926277	0.495052	0.0604305	0.00214944	0.0743514	-0.00247384	0.00138633	0.920606
LIN52	0	0	5.23024e-10	7.42869e-258	0.933406	0.493802	0.0615581	0.00206536	0.0744321	-0.00468704	0.00262732	0.920606
FBXO47	0	0	5.29009e-10	8.93846e-258	0.924393	0.494866	0.0607064	0.00194304	0.0744518	0.0015837	0.000887805	0.920606
TREML2	0	0	5.19364e-10	9.10715e-258	0.920979	0.498978	0.0605179	0.00202534	0.074478	-0.00237962	0.00133411	0.920606
MT1A	0	0	5.32792e-10	1.05106e-257	0.932053	0.492672	0.0612394	0.00204275	0.0745474	0.0229019	0.0128428	0.920606
RARRES1	0	0	5.47094e-10	8.19113e-258	0.934668	0.497691	0.0618722	0.00216146	0.0746342	0.00146812	0.000823527	0.920606
TRIM49B	0	0	5.53758e-10	1.059e-257	0.924366	0.495428	0.0608593	0.00204955	0.0746701	-0.00483713	0.00271368	0.920606
TTC5	0	0	5.21742e-10	8.28764e-258	0.921981	0.491244	0.0616694	0.00205228	0.0746862	-0.00174782	0.0009806	0.920606
ABCB10	0	0	5.13012e-10	7.87502e-258	0.932139	0.492126	0.060567	0.0020348	0.0746865	-0.00204181	0.00114554	0.920606
GLRA2	0	0	5.16208e-10	1.03679e-257	0.928143	0.497453	0.0608607	0.00209829	0.0747722	0.00586417	0.00329102	0.920606
LURAP1L	0	0	5.64316e-10	6.30767e-258	0.920849	0.49612	0.0595963	0.00214859	0.0748069	0.00225494	0.00126564	0.920606
TTC39B	0	0	5.83196e-10	9.60896e-258	0.934738	0.49819	0.0614197	0.00205913	0.0748099	-0.00124008	0.000696031	0.920606
ITM2C	0	0	5.24497e-10	9.15959e-258	0.932301	0.499597	0.0609835	0.00202292	0.0748225	-0.00176656	0.000991577	0.920606
SPRY1	0	0	5.07821e-10	7.59406e-258	0.927765	0.497172	0.0612338	0.00214435	0.0748677	0.00306693	0.00172175	0.920606
PADI6	0	0	5.19799e-10	7.51787e-258	0.923994	0.492225	0.0603857	0.00210454	0.0749325	-0.00588442	0.0033042	0.920606
NOL10	0	0	5.23935e-10	9.7022e-258	0.932394	0.497171	0.060518	0.00206915	0.0749551	0.0015275	0.000857786	0.920606
ZC3H12C	0	0	5.31434e-10	6.19571e-258	0.925356	0.492005	0.0593229	0.00208064	0.0749706	0.00164382	0.000923152	0.920606
KMT2D	0	0	5.31466e-10	1.07483e-257	0.926047	0.49051	0.0602193	0.00227756	0.0749978	-0.000773992	0.000434707	0.920606
MTX2	0	0	5.18912e-10	5.57741e-258	0.924458	0.497855	0.0604923	0.0020555	0.0752508	-0.0029628	0.00166548	0.920606
SYTL1	0	0	5.48002e-10	9.09727e-258	0.929549	0.497249	0.0615055	0.00202179	0.0752732	0.00173031	0.000972733	0.920606
CCDC121	0	0	5.44757e-10	9.24236e-258	0.931763	0.492719	0.0613223	0.00200352	0.075286	0.00297361	0.00167176	0.920606
LCE1B	0	0	5.39918e-10	7.61604e-258	0.927074	0.497601	0.0618407	0.00204872	0.0752962	0.0111153	0.00624923	0.920606
TMF1	0	0	5.45959e-10	7.64072e-258	0.923095	0.491432	0.0614496	0.00212946	0.0753568	-0.00105133	0.000591197	0.920606
SLC22A14	0	0	5.27522e-10	7.60117e-258	0.93013	0.490912	0.0605169	0.00206994	0.0753703	0.00145214	0.000816625	0.920606
CPA5	0	0	5.45459e-10	1.2558e-257	0.930159	0.493542	0.0620393	0.00213707	0.0754465	-0.0013078	0.000735646	0.920606
SENP6	0	0	5.38337e-10	7.07712e-258	0.923959	0.494287	0.0608351	0.00222705	0.0754576	0.0010244	0.000576257	0.920606
ABCA3	0	0	5.1291e-10	6.58194e-258	0.930929	0.497677	0.0606509	0.00222106	0.07559	-0.000702048	0.000395101	0.920606
TRAM2	0	0	5.06155e-10	7.5716e-258	0.925256	0.49207	0.0608644	0.00224823	0.0756366	0.00208073	0.00117119	0.920606
KRT8	0	0	5.45729e-10	9.18782e-258	0.934172	0.499354	0.0620544	0.00187395	0.0756405	0.00138537	0.000779798	0.920606
SMIM13	0	0	4.98234e-10	8.76832e-258	0.921137	0.493323	0.0612206	0.00213416	0.0756701	0.00940564	0.00529479	0.920606
MAGEC2	0	0	5.03082e-10	7.90952e-258	0.925481	0.493648	0.0601839	0.00213816	0.0756984	-0.00442695	0.00249234	0.920606
ELF3	0	0	5.32955e-10	7.40808e-258	0.92878	0.493291	0.0610702	0.00222946	0.0757002	0.00238286	0.00134154	0.920606
METTL21C	0	0	5.37896e-10	6.88761e-258	0.926952	0.491456	0.0620905	0.0021532	0.0757099	-0.00159382	0.000897346	0.920606
MMAB	0	0	5.22563e-10	7.14067e-258	0.930252	0.494118	0.0616791	0.00206382	0.0757132	0.00172256	0.00096984	0.920606
WDR6	0	0	5.10986e-10	1.3039e-257	0.932378	0.48939	0.0604738	0.00208989	0.0757599	-0.001031	0.00058057	0.920606
ACTL6B	0	0	5.1554e-10	7.11716e-258	0.926999	0.484231	0.0608678	0.00210187	0.0758466	-0.00367396	0.00206946	0.920606
NR5A2	0	0	5.08773e-10	1.02657e-257	0.929911	0.495906	0.0603489	0.00207983	0.0759615	0.00306906	0.00172941	0.920606
RIMKLB	0	0	5.24515e-10	7.41169e-258	0.927741	0.492928	0.061027	0.0020128	0.0759917	-0.00366843	0.00206737	0.920606
CALY	0	0	5.4075e-10	9.58338e-258	0.929548	0.486701	0.0604431	0.00206378	0.0760821	-0.00165675	0.000933958	0.920606
C14orf159	0	0	5.2786e-10	7.68096e-258	0.924568	0.4884	0.0612775	0.00191531	0.076104	-0.00177247	0.000999269	0.920606
KRTAP4-7	0	0	5.46279e-10	7.17729e-258	0.931386	0.492369	0.0600577	0.00215533	0.0761217	-0.000932412	0.0005257	0.920606
FAM167B	0	0	5.25894e-10	6.35475e-258	0.926772	0.497547	0.0601373	0.00211926	0.0761978	-0.00388341	0.00219006	0.920606
GPR62	0	0	5.2136e-10	6.57667e-258	0.925762	0.489938	0.0605046	0.00214754	0.0762456	0.0030109	0.00169828	0.920606
FRZB	0	0	5.33062e-10	8.00267e-258	0.925246	0.491799	0.061708	0.00211054	0.0762725	-0.00114297	0.000644743	0.920606
LHX6	0	0	5.26134e-10	8.47045e-258	0.925906	0.499972	0.0608831	0.00202723	0.0763268	0.00239846	0.00135321	0.920606
PRR18	0	0	5.19693e-10	8.68335e-258	0.927007	0.495367	0.060634	0.00211494	0.0763426	0.0018905	0.00106668	0.920606
RNF215	0	0	5.31422e-10	7.57736e-258	0.933327	0.495223	0.0603399	0.00215195	0.0763534	0.0011238	0.000634104	0.920606
LTBR	0	0	5.17289e-10	8.77852e-258	0.931399	0.497716	0.0609939	0.00206526	0.0764193	-0.00377112	0.00212833	0.920803
HBB	0	0	5.2138e-10	8.62157e-258	0.922483	0.494277	0.0610654	0.00209765	0.0766024	0.00587812	0.00331954	0.921306
ZSCAN12	0	0	5.56511e-10	9.21346e-258	0.927808	0.498978	0.0611909	0.00194108	0.0766084	-0.00150531	0.000850106	0.921306
SCN2A	0	0	5.21783e-10	5.91484e-258	0.922771	0.493917	0.0620922	0.00209318	0.076637	0.00128234	0.000724257	0.921306
INSIG1	0	0	5.26632e-10	1.11673e-257	0.926788	0.494756	0.060886	0.00210072	0.0766596	0.00371537	0.00209858	0.921306
DEFB113	0	0	5.24479e-10	7.04183e-258	0.923063	0.495064	0.0604609	0.00212324	0.0767216	0.010268	0.00580099	0.921454
CNIH1	0	0	5.312e-10	7.97373e-258	0.935665	0.495109	0.059786	0.00211517	0.0769063	0.00772253	0.00436563	0.921755
VRTN	0	0	5.51146e-10	7.52429e-258	0.934842	0.49474	0.0609014	0.00200968	0.0769901	0.00154836	0.000875554	0.921755
ENDOG	0	0	5.39711e-10	7.40904e-258	0.927943	0.494088	0.0599787	0.00214174	0.0770208	-0.00131945	0.000746191	0.921755
CCDC188	0	0	5.2897e-10	7.59719e-258	0.933989	0.495262	0.0605711	0.00203271	0.0770314	-0.00200571	0.00113433	0.921755
ALDH3A2	0	0	5.44897e-10	9.8623e-258	0.930896	0.487345	0.0617339	0.00208272	0.0770598	-0.00211263	0.00119492	0.921755
ZNF534	0	0	4.97319e-10	6.7806e-258	0.923705	0.491136	0.0598934	0.00203997	0.0770929	-0.00191292	0.00108208	0.921755
RUVBL2	0	0	5.37622e-10	5.78992e-258	0.92867	0.491223	0.0612253	0.00202071	0.0771115	0.00182666	0.00103335	0.921755
KIF4B	0	0	5.38916e-10	8.155e-258	0.930025	0.487855	0.0607164	0.00216497	0.0771441	-0.00101945	0.000576772	0.921755
CEBPD	0	0	5.28716e-10	7.95884e-258	0.929551	0.496389	0.0610815	0.00208666	0.0773098	-0.00242114	0.00137057	0.923141
NCKIPSD	0	0	5.05133e-10	9.39127e-258	0.924358	0.496456	0.0618798	0.0019979	0.0774769	-0.001333	0.000755012	0.923526
ZIC2	0	0	5.19568e-10	7.7834e-258	0.931204	0.495774	0.0609991	0.00208128	0.0774937	-0.00467866	0.00265015	0.923526
CA5B	0	0	5.25318e-10	9.05602e-258	0.920697	0.495289	0.0609528	0.00210858	0.0775389	-0.00358588	0.00203147	0.923526
MTHFD2	0	0	5.2073e-10	5.39486e-258	0.92799	0.492232	0.0617994	0.00203071	0.0775411	-0.00239634	0.00135759	0.923526
TEPP	0	0	5.25304e-10	8.60518e-258	0.930384	0.491645	0.0595641	0.0020749	0.0776279	0.00222354	0.00126006	0.923966
WNT10A	0	0	5.14266e-10	8.52696e-258	0.919654	0.499633	0.0609251	0.00208925	0.0777516	-0.000790113	0.000447936	0.924845
LILRB3	0	0	5.25136e-10	7.74504e-258	0.929322	0.501182	0.0607709	0.00204152	0.077836	0.00334272	0.00189562	0.925257
ZNF705D	0	0	5.35736e-10	8.494e-258	0.926433	0.492875	0.0612188	0.001918	0.0779661	0.00247922	0.00140655	0.926209
RPL24	0	0	5.21547e-10	7.69813e-258	0.92533	0.499179	0.0617217	0.00202227	0.078022	-0.00656662	0.00372618	0.92628
TENM1	0	0	4.99686e-10	8.59217e-258	0.936379	0.487829	0.0613646	0.00203708	0.0781249	0.0017879	0.00101488	0.926336
APLF	0	0	5.27667e-10	9.48041e-258	0.925729	0.495161	0.06018	0.00210052	0.0782068	0.00189253	0.00107457	0.926336
ZNF385C	0	0	5.3326e-10	7.82499e-258	0.926352	0.499559	0.060652	0.00212464	0.0782181	-0.00152048	0.000863351	0.926336
HIST1H4L	0	0	5.15217e-10	9.40292e-258	0.926201	0.497768	0.0606215	0.00228447	0.0782501	0.00160213	0.000909814	0.926336
CLDN12	0	0	5.30313e-10	6.00626e-258	0.925929	0.49327	0.0606457	0.00208668	0.0782763	0.00379777	0.00215685	0.926336
C1QTNF12	0	0	5.10294e-10	9.53025e-258	0.931493	0.492185	0.0613991	0.00201867	0.0783651	0.00227344	0.00129154	0.926703
TEN1	0	0	5.26681e-10	6.57811e-258	0.935556	0.4901	0.0598898	0.00203198	0.0784072	0.00335594	0.00190677	0.926703
ZNF610	0	0	5.19855e-10	7.9164e-258	0.930538	0.48897	0.0606688	0.00210443	0.0786305	0.00162708	0.000925159	0.927223
KCTD8	0	0	5.33218e-10	1.14157e-257	0.933631	0.489875	0.0614505	0.00210287	0.0786835	0.00246407	0.00140132	0.927223
ASS1	0	0	5.24515e-10	1.06552e-257	0.925139	0.497306	0.0612158	0.00212159	0.0786988	0.00176211	0.00100217	0.927223
MIPEP	0	0	5.40807e-10	7.2621e-258	0.93098	0.491291	0.0609388	0.00220381	0.0787208	-0.00108366	0.000616359	0.927223
CDC123	0	0	5.39055e-10	7.52882e-258	0.929623	0.488979	0.0611273	0.00202481	0.07874	-0.0036252	0.00206205	0.927223
CREB3L1	0	0	5.25134e-10	8.14292e-258	0.930916	0.491437	0.061272	0.00206154	0.078887	-0.000975699	0.00055526	0.927223
SLC25A24	0	0	5.14317e-10	8.31515e-258	0.919753	0.49599	0.0606525	0.00204709	0.0789124	-0.00163754	0.000931984	0.927223
KCNK18	0	0	5.28654e-10	6.45113e-258	0.920313	0.497489	0.0619347	0.00192567	0.0789239	-0.00114182	0.000649879	0.927223
LGALS13	0	0	5.21734e-10	8.99247e-258	0.924626	0.49371	0.0613052	0.00211143	0.0790746	-0.00214651	0.00122232	0.927223
C11orf21	0	0	5.02776e-10	8.48958e-258	0.933362	0.499258	0.0615703	0.00214399	0.0790807	0.00531775	0.00302823	0.927223
OPRM1	0	0	5.47226e-10	9.9948e-258	0.928048	0.492226	0.0601952	0.00199448	0.0790854	0.00068613	0.000390728	0.927223
HSBP1	0	0	5.10079e-10	7.6464e-258	0.927935	0.494817	0.0611378	0.00202253	0.0791425	0.00438054	0.00249504	0.927223
CCDC83	0	0	5.08786e-10	1.08233e-257	0.926492	0.493268	0.0605992	0.00212357	0.0793138	-0.00270697	0.0015427	0.927223
GOLGA3	0	0	5.10615e-10	1.48937e-257	0.924297	0.498376	0.0606061	0.00198805	0.0793483	-0.00067824	0.000386573	0.927223
TAF10	0	0	5.17546e-10	9.86655e-258	0.925737	0.490406	0.0612991	0.00221223	0.0793512	-0.00269123	0.00153392	0.927223
PALD1	0	0	5.20508e-10	1.08042e-257	0.931304	0.496606	0.0608544	0.00216281	0.0793586	0.00130004	0.000741001	0.927223
ODF3L2	0	0	5.30868e-10	7.58112e-258	0.924114	0.489901	0.0598121	0.0019399	0.0793772	-0.00223765	0.00127551	0.927223
ITGB2	0	0	5.27487e-10	9.86822e-258	0.930079	0.494955	0.0618035	0.00202484	0.0793958	-0.000926289	0.000528036	0.927223
ITGA8	0	0	5.21177e-10	7.432e-258	0.94023	0.493592	0.0607691	0.00219054	0.0794185	0.00124867	0.000711866	0.927223
WFDC11	0	0	5.29644e-10	1.03985e-257	0.925064	0.495816	0.0606447	0.00212995	0.0794505	-0.00754348	0.00430099	0.927223
CASZ1	0	0	5.07678e-10	8.87892e-258	0.93249	0.496536	0.0601105	0.00224746	0.0796037	0.000821595	0.000468679	0.927686
G6PC3	0	0	5.25407e-10	8.5825e-258	0.929186	0.491729	0.0621207	0.00204258	0.0796152	-0.00181954	0.00103799	0.927686
CDK12	0	0	5.30338e-10	8.21111e-258	0.92841	0.493025	0.061692	0.00200623	0.0796814	-0.00169512	0.000967232	0.927686
TCHP	0	0	5.22306e-10	7.73682e-258	0.932038	0.489513	0.0610559	0.00201953	0.0796902	-0.00120851	0.000689592	0.927686
SCAF8	0	0	5.43257e-10	8.0247e-258	0.92905	0.494158	0.0603924	0.00200247	0.0798735	0.00133235	0.00076072	0.928289
MAPKAPK3	0	0	5.06825e-10	8.22283e-258	0.929807	0.495836	0.061032	0.00215172	0.0798798	-0.00209907	0.00119851	0.928289
TNFAIP8L2	0	0	5.28422e-10	8.6497e-258	0.927751	0.500533	0.0596272	0.00204328	0.0799156	-0.00297832	0.00170074	0.928289
EMC4	0	0	5.12951e-10	8.34692e-258	0.925732	0.491789	0.0615232	0.00208147	0.0799421	-0.00550075	0.00314143	0.928289
ZYG11B	0	0	5.2563e-10	9.93339e-258	0.931638	0.489977	0.0609377	0.00205196	0.0800929	0.00371728	0.00212397	0.929241
ENC1	0	0	5.11388e-10	5.80428e-258	0.927359	0.496508	0.060948	0.00208122	0.0802229	0.00348658	0.00199301	0.929241
DNAJC16	0	0	5.22736e-10	7.43126e-258	0.92363	0.494711	0.0613061	0.00214144	0.0802626	0.0015878	0.000907744	0.929241
ZNF846	0	0	5.18441e-10	9.32977e-258	0.923047	0.495311	0.0599489	0.00214776	0.0802719	-0.00102706	0.000587188	0.929241
TTLL8	0	0	5.39895e-10	6.17085e-258	0.925854	0.496662	0.0617858	0.00195497	0.0802745	-0.00114473	0.000654466	0.929241
MOGAT2	0	0	5.25253e-10	6.70142e-258	0.932293	0.492619	0.0596294	0.00211208	0.0803638	0.00204665	0.00117046	0.929695
WBP2NL	0	0	5.08415e-10	8.36292e-258	0.925176	0.498765	0.0608898	0.00206691	0.0805215	-0.00426308	0.00243928	0.929741
PCOLCE2	0	0	5.1788e-10	1.0214e-257	0.926538	0.498473	0.0612373	0.00203469	0.0805526	0.00124853	0.000714463	0.929741
SGTB	0	0	5.48713e-10	8.00913e-258	0.931199	0.490687	0.0604816	0.0020235	0.0806866	0.00372248	0.00213112	0.929741
PGC	0	0	5.47684e-10	9.95071e-258	0.918489	0.492485	0.0611261	0.00209317	0.0807081	-0.00285943	0.00163714	0.929741
HSD17B1	0	0	5.24156e-10	7.68919e-258	0.928864	0.490152	0.0606814	0.00212335	0.0807292	-0.00278632	0.00159539	0.929741
GDF1	0	0	5.13064e-10	1.0947e-257	0.93007	0.490667	0.0603265	0.00205589	0.0807717	-0.00189192	0.00108343	0.929741
BAHD1	0	0	5.152e-10	8.61919e-258	0.927891	0.486246	0.0594346	0.00210918	0.0808535	-0.00173518	0.000993937	0.929741
PTPN21	0	0	5.255e-10	9.40127e-258	0.932549	0.493772	0.0606874	0.00209912	0.0809625	-0.00118468	0.000678846	0.929741
DNAAF2	0	0	5.34259e-10	8.23769e-258	0.930022	0.489132	0.061184	0.0020699	0.0809733	0.00170543	0.000977277	0.929741
RPA2	0	0	5.17746e-10	8.9327e-258	0.927954	0.49503	0.0618787	0.0019496	0.0810134	0.00277028	0.00158769	0.929741
ACSS2	0	0	5.22667e-10	9.78596e-258	0.922352	0.492989	0.0600323	0.0022191	0.0810475	0.00110553	0.000633666	0.929741
F13A1	0	0	5.27197e-10	9.65966e-258	0.930765	0.495284	0.0604987	0.00211592	0.0810567	0.00192567	0.00110379	0.929741
RBAK	0	0	5.32577e-10	7.19643e-258	0.925103	0.490561	0.0604985	0.00205335	0.0811308	0.00211208	0.00121093	0.929741
2005-09-01	0	0	5.2316e-10	8.74953e-258	0.935051	0.491542	0.0613323	0.00210998	0.0811508	0.00363146	0.00208219	0.929741
GAS2	0	0	5.22604e-10	1.07877e-257	0.923027	0.485217	0.0610631	0.00199065	0.0811535	-0.00202643	0.00116191	0.929741
CEBPG	0	0	5.04683e-10	8.48702e-258	0.932836	0.497019	0.0619594	0.00201638	0.0811694	-0.00310473	0.00178028	0.929741
PCDHGC5	0	0	5.27955e-10	7.64226e-258	0.923999	0.498526	0.0608874	0.00221237	0.0812712	-0.00221539	0.00127075	0.930332
GDPD5	0	0	5.31675e-10	7.2263e-258	0.931929	0.493308	0.0606314	0.002228	0.0814427	0.00131312	0.000753634	0.93172
CATSPER3	0	0	5.28124e-10	7.96758e-258	0.917045	0.496134	0.0606621	0.00211469	0.0815536	0.00184789	0.00106093	0.932008
SCGB3A1	0	0	5.31993e-10	8.74053e-258	0.934354	0.49288	0.0611638	0.00214501	0.0815683	-0.0115421	0.00662703	0.932008
MUC5B	0	0	5.26136e-10	8.56149e-258	0.927312	0.494228	0.0608669	0.00203887	0.0817612	0.000803012	0.00046135	0.933637
TFB1M	0	0	5.38718e-10	8.06967e-258	0.926459	0.490577	0.0608022	0.00212757	0.0818164	-0.0020353	0.00116954	0.933693
AP3D1	0	0	5.60232e-10	7.55409e-258	0.922632	0.489103	0.0616761	0.00216582	0.0818802	0.00143277	0.000823483	0.933847
SDE2	0	0	5.27381e-10	9.67633e-258	0.921906	0.494434	0.0607054	0.00218465	0.0821382	0.00131403	0.000755875	0.936068
SHCBP1L	0	0	5.24556e-10	9.39652e-258	0.927232	0.495048	0.0612285	0.00203319	0.0822743	-0.00175052	0.0010074	0.936068
TMPRSS9	0	0	5.16753e-10	7.93656e-258	0.920796	0.500404	0.0621056	0.00203552	0.0822759	-0.00078673	0.000452757	0.936068
BRCA2	0	0	5.18868e-10	7.68862e-258	0.930136	0.492842	0.060777	0.00203928	0.0822843	-0.00043448	0.000250047	0.936068
PLAT	0	0	5.25726e-10	7.64291e-258	0.930022	0.498897	0.0614439	0.00213308	0.0824006	-0.00135575	0.00078054	0.936068
TESC	0	0	5.14293e-10	9.3052e-258	0.92301	0.494291	0.0616422	0.00211841	0.0824223	0.00345464	0.00198907	0.936068
ANKS6	0	0	5.28048e-10	6.68617e-258	0.926629	0.494313	0.0614361	0.00209247	0.082428	-0.00108761	0.00062622	0.936068
RLN3	0	0	5.33365e-10	8.51535e-258	0.931543	0.497895	0.061086	0.00202679	0.0825367	-0.00157347	0.000906288	0.93627
WDR86	0	0	5.27173e-10	6.89554e-258	0.922087	0.494154	0.0614926	0.00204516	0.082559	0.000853285	0.000491513	0.93627
ZNF770	0	0	5.26801e-10	1.15973e-257	0.928303	0.491195	0.0604319	0.00207724	0.0826308	-0.00372969	0.00214889	0.93627
WDR13	0	0	5.43903e-10	8.46794e-258	0.927949	0.497776	0.0595899	0.00209563	0.0826477	0.00526165	0.00303171	0.93627
TMEM229B	0	0	5.53948e-10	6.85162e-258	0.926832	0.498158	0.0593628	0.00212409	0.0827137	0.00813899	0.00469061	0.936447
PDE3B	0	0	5.25855e-10	1.31441e-257	0.923971	0.49275	0.061327	0.00203909	0.0828212	-0.000757183	0.000436528	0.936453
FAM107B	0	0	5.28188e-10	8.15935e-258	0.925837	0.49089	0.0607251	0.00202077	0.082844	0.00230274	0.00132766	0.936453
PLAGL1	0	0	5.13018e-10	6.7731e-258	0.927207	0.497041	0.060774	0.00203038	0.0829494	0.00254009	0.00146501	0.936453
PGS1	0	0	5.00741e-10	9.13548e-258	0.934313	0.49474	0.0605521	0.00202564	0.0830005	0.00141427	0.000815823	0.936453
USP15	0	0	5.52719e-10	7.09265e-258	0.926632	0.496714	0.0605849	0.00209519	0.0830465	0.00377964	0.00218062	0.936453
BCAS4	0	0	5.25469e-10	1.0856e-257	0.92613	0.490818	0.0606261	0.00205498	0.0830803	0.00242121	0.00139704	0.936453
RCL1	0	0	5.3151e-10	7.61916e-258	0.933205	0.500911	0.0608991	0.00204772	0.0832072	-0.000992661	0.000573002	0.936453
ABCC3	0	0	5.09319e-10	7.85467e-258	0.934974	0.494782	0.0603348	0.00210039	0.083274	-0.000600721	0.000346835	0.936453
MAP7D3	0	0	5.25369e-10	8.4203e-258	0.927664	0.49117	0.0614231	0.00204618	0.0832764	-0.00340361	0.00196514	0.936453
MEF2A	0	0	5.36608e-10	7.95225e-258	0.925684	0.494113	0.061677	0.00206847	0.0832971	0.00163019	0.000941283	0.936453
ZNF287	0	0	5.3952e-10	1.06426e-257	0.934447	0.491151	0.0614577	0.00195614	0.0833125	-0.00292502	0.00168901	0.936453
CCDC125	0	0	5.36068e-10	8.84445e-258	0.933807	0.496127	0.0606463	0.00217149	0.0833777	0.00128992	0.000745003	0.936453
NTRK3	0	0	5.43464e-10	7.50772e-258	0.932479	0.498022	0.061206	0.00215282	0.0834199	-0.00140473	0.000811425	0.936453
TMEM208	0	0	5.4201e-10	7.5674e-258	0.917584	0.491315	0.0598439	0.00210804	0.0834675	-0.0035369	0.00204336	0.936453
PYGL	0	0	5.31833e-10	9.58817e-258	0.928247	0.49669	0.0620182	0.00197976	0.0835388	-0.000597841	0.000345468	0.936453
HLA-DQA1	0	0	5.25525e-10	9.88802e-258	0.921306	0.494013	0.061013	0.00199728	0.0836163	-0.00232018	0.00134107	0.936453
TTC37	0	0	5.29863e-10	7.56837e-258	0.924509	0.499332	0.0601323	0.00206717	0.0836793	-0.00106233	0.000614156	0.936453
TRAPPC10	0	0	5.33685e-10	7.70675e-258	0.924382	0.496782	0.0618725	0.00201714	0.0837253	-0.00117435	0.00067902	0.936453
CD72	0	0	4.9199e-10	9.12582e-258	0.92566	0.492014	0.0611897	0.0020517	0.0837271	-0.00557543	0.00322378	0.936453
CRISPLD1	0	0	5.22076e-10	7.87255e-258	0.924905	0.49092	0.0620094	0.0020462	0.0837816	-0.00212463	0.0012287	0.936453
CCDC114	0	0	5.44099e-10	8.79797e-258	0.926042	0.492691	0.0602776	0.00215092	0.083829	0.00209181	0.00120991	0.936453
ZC3H12B	0	0	5.13929e-10	6.93511e-258	0.930186	0.495732	0.0610173	0.00207364	0.0838816	0.00524462	0.00303402	0.936453
IRAK1BP1	0	0	4.98323e-10	1.03917e-257	0.929341	0.494708	0.0617266	0.00206576	0.084022	-0.00241859	0.00139979	0.936453
CABP2	0	0	5.15731e-10	9.98126e-258	0.922736	0.49082	0.061049	0.00212457	0.0840325	0.00136574	0.000790466	0.936453
ITPRIPL1	0	0	5.15404e-10	1.20762e-257	0.922788	0.494606	0.0619048	0.00210997	0.0841335	0.00143178	0.000828957	0.936453
TTC29	0	0	5.42107e-10	6.72292e-258	0.93328	0.496962	0.0614195	0.00201145	0.0842389	-0.00113766	0.000658894	0.936453
DHRS12	0	0	5.15698e-10	1.01481e-257	0.929006	0.489592	0.0610346	0.00192478	0.0843227	-0.001955	0.00113258	0.936453
TIFAB	0	0	5.00868e-10	6.99211e-258	0.925406	0.495185	0.0621271	0.00199976	0.0843549	-0.00291374	0.00168818	0.936453
IPO7	0	0	5.22317e-10	1.00247e-257	0.924214	0.49121	0.0612096	0.00205025	0.0843631	-0.00295513	0.0017122	0.936453
GPR137	0	0	5.15824e-10	9.2522e-258	0.929602	0.496473	0.0612977	0.00209799	0.0843714	0.00277945	0.00161045	0.936453
BMP7	0	0	5.18473e-10	7.81695e-258	0.926922	0.494921	0.0604573	0.00208678	0.0844601	-0.00200075	0.0011596	0.936453
MMADHC	0	0	5.3038e-10	8.9888e-258	0.929763	0.495112	0.0613604	0.00209515	0.0845196	-0.00193395	0.0011211	0.936453
TCERG1L	0	0	5.139e-10	7.1428e-258	0.926608	0.493917	0.0598615	0.00211954	0.084573	-0.000804265	0.000466305	0.936453
TBRG1	0	0	5.37928e-10	8.17838e-258	0.931819	0.494185	0.0619282	0.00208667	0.0845733	-0.00168577	0.000977393	0.936453
LOXL2	0	0	5.15064e-10	7.25731e-258	0.930264	0.493581	0.0615453	0.00202155	0.0846691	-0.00115836	0.000671816	0.936453
CRLF3	0	0	5.24709e-10	7.23424e-258	0.924512	0.492896	0.061591	0.00200642	0.0847266	-0.00224937	0.00130481	0.936453
EIPR1	0	0	5.21106e-10	7.56311e-258	0.927667	0.493147	0.0618605	0.00210016	0.0848269	0.0021252	0.00123318	0.936453
BOLA1	0	0	5.33e-10	6.74784e-258	0.930345	0.489434	0.0606838	0.00220616	0.0848378	-0.00144679	0.000839549	0.936453
TMEM251	0	0	5.56722e-10	6.89025e-258	0.926114	0.498458	0.0606074	0.00198681	0.0849451	-0.00244982	0.00142208	0.936453
CTNNBL1	0	0	5.36731e-10	8.37663e-258	0.934205	0.493277	0.0613955	0.00199891	0.084979	-0.00177598	0.00103104	0.936453
NRIP3	0	0	5.13294e-10	8.29865e-258	0.922789	0.493724	0.0611718	0.00209891	0.0850164	0.00112152	0.000651174	0.936453
KCNH4	0	0	5.33965e-10	9.12485e-258	0.928157	0.494863	0.06147	0.00207391	0.0850441	0.00123042	0.000714464	0.936453
SSRP1	0	0	5.28779e-10	8.80301e-258	0.928735	0.500253	0.0603093	0.00214921	0.0850493	0.00154855	0.00089921	0.936453
PTPRQ	0	0	5.28132e-10	6.79671e-258	0.926398	0.497065	0.061059	0.00213595	0.0850792	0.000746039	0.000433251	0.936453
SLC3A2	0	0	5.05499e-10	8.33285e-258	0.929664	0.492379	0.0609369	0.00219941	0.0851349	-0.00106321	0.000617551	0.936453
LCN10	0	0	5.36775e-10	8.55482e-258	0.924581	0.49788	0.0611621	0.00216422	0.0852064	0.00577474	0.00335496	0.936453
TACR3	0	0	5.26263e-10	9.19197e-258	0.933711	0.494502	0.0615543	0.00196349	0.0852362	-0.00124719	0.00072465	0.936453
BCKDHA	0	0	5.12386e-10	6.38331e-258	0.928929	0.493681	0.0613214	0.00192137	0.0852505	-0.000907731	0.00052744	0.936453
FGF3	0	0	5.35859e-10	1.04749e-257	0.929096	0.497157	0.0602908	0.00206441	0.0852543	0.00250832	0.00145748	0.936453
KLHL12	0	0	5.33645e-10	1.22971e-257	0.92664	0.501586	0.0611331	0.00201913	0.0852777	-0.0028864	0.00167729	0.936453
C11orf84	0	0	5.38426e-10	8.09246e-258	0.926002	0.49891	0.0604373	0.00208201	0.085338	0.00266133	0.0015468	0.936453
TAS2R19	0	0	5.05509e-10	6.94009e-258	0.929061	0.493361	0.0607501	0.00211308	0.0853386	-0.00443415	0.0025772	0.936453
DUSP16	0	0	5.3226e-10	8.61956e-258	0.928046	0.499802	0.0624561	0.00200427	0.0854538	-0.00194464	0.00113067	0.936779
ZKSCAN4	0	0	5.47795e-10	6.9724e-258	0.933169	0.493528	0.0601279	0.00211355	0.0855276	0.00223879	0.00130201	0.936779
SPATA21	0	0	5.291e-10	9.13368e-258	0.925617	0.49622	0.0611373	0.00202583	0.085565	-0.00253868	0.00147659	0.936779
LRRC26	0	0	5.26716e-10	7.47963e-258	0.928798	0.501358	0.060795	0.00198782	0.0856102	0.00122825	0.000714498	0.936779
RIDA	0	0	5.0641e-10	7.48064e-258	0.927638	0.489989	0.0609443	0.00210177	0.0856206	-0.00292437	0.00170123	0.936779
PRKAA2	0	0	5.26524e-10	1.20235e-257	0.927175	0.492069	0.0620124	0.00197823	0.0858861	-0.00201416	0.00117271	0.937543
PSMC5	0	0	5.61744e-10	6.96366e-258	0.936577	0.497529	0.0606057	0.00215933	0.0860171	-0.00422214	0.00245931	0.937543
EVI2A	0	0	5.26223e-10	6.77601e-258	0.929859	0.494798	0.0600511	0.00211817	0.0860553	-0.0012809	0.000746189	0.937543
SLC35E3	0	0	5.34645e-10	8.71653e-258	0.92732	0.493933	0.0608097	0.00203336	0.0860593	-0.00270742	0.00157722	0.937543
CCDC173	0	0	4.97635e-10	7.64692e-258	0.923721	0.494738	0.0610024	0.00204153	0.0861185	-0.00134363	0.000782889	0.937543
PPIP5K1	0	0	5.19124e-10	8.57097e-258	0.921706	0.503623	0.0601808	0.00207918	0.0861634	-0.00282115	0.00164402	0.937543
QTRT1	0	0	5.26027e-10	6.94746e-258	0.928812	0.495144	0.0607735	0.00211165	0.086179	-0.00123004	0.000716841	0.937543
CAVIN4	0	0	5.36445e-10	8.78394e-258	0.924486	0.493187	0.061325	0.00199005	0.0861898	-0.00233654	0.00136173	0.937543
SEPHS1	0	0	5.15015e-10	6.28152e-258	0.928122	0.494723	0.0610544	0.00198214	0.0861952	0.00489575	0.00285328	0.937543
CLDN14	0	0	5.13038e-10	8.43054e-258	0.928837	0.491547	0.0604133	0.00203928	0.0862129	0.00189038	0.00110179	0.937543
SMCO4	0	0	5.39951e-10	7.99953e-258	0.925056	0.498175	0.0601448	0.00214073	0.0863619	-0.00494098	0.00288117	0.937543
BRF1	0	0	5.33719e-10	7.82617e-258	0.922775	0.497531	0.0607409	0.00207269	0.0864156	0.00144584	0.000843238	0.937543
RAI1	0	0	5.41142e-10	8.94991e-258	0.928977	0.494585	0.0610449	0.0020838	0.0864359	-0.00115751	0.000675122	0.937543
PTAR1	0	0	4.86129e-10	8.33512e-258	0.922195	0.50165	0.0609096	0.00197174	0.086449	-0.00123745	0.000721776	0.937543
SMG1	0	0	5.44682e-10	7.74181e-258	0.938088	0.494493	0.0605952	0.00205534	0.0864808	0.000946776	0.00055229	0.937543
CHD2	0	0	4.99957e-10	1.11025e-257	0.926308	0.491083	0.0616978	0.00218594	0.0865541	-0.00143412	0.000836768	0.937543
CFAP74	0	0	4.95038e-10	6.90081e-258	0.937967	0.49062	0.05974	0.00213093	0.0866831	0.00112298	0.000655496	0.937543
SLC16A10	0	0	5.33662e-10	7.4751e-258	0.929175	0.494857	0.0604795	0.00199219	0.0866875	-0.00297958	0.00173924	0.937543
ZFP69	0	0	4.97823e-10	7.10436e-258	0.927351	0.495337	0.0613952	0.00207807	0.086763	-0.00144625	0.000844411	0.937543
OLAH	0	0	5.3106e-10	7.47224e-258	0.920381	0.491776	0.0614279	0.00196184	0.0867769	-0.00133064	0.00077694	0.937543
GRM8	0	0	5.11497e-10	8.80334e-258	0.927737	0.491296	0.0608869	0.00215132	0.0870938	0.00149217	0.000872132	0.937543
SAMD4B	0	0	5.50688e-10	7.63317e-258	0.932142	0.490448	0.0605911	0.00208581	0.0870997	0.00269945	0.00157778	0.937543
TAC4	0	0	4.99202e-10	5.93042e-258	0.928872	0.488142	0.0611931	0.00202905	0.0871345	0.00722173	0.00422145	0.937543
CNEP1R1	0	0	5.35776e-10	8.12935e-258	0.926788	0.496333	0.0609621	0.00206372	0.0871561	-0.0108379	0.00633569	0.937543
GYS1	0	0	5.45814e-10	1.01242e-257	0.927254	0.496354	0.0615608	0.00208471	0.0871726	0.00136686	0.000799091	0.937543
CASP4	0	0	5.15718e-10	9.6054e-258	0.925817	0.495701	0.0600382	0.00202733	0.087181	0.00210156	0.00122864	0.937543
RECQL	0	0	5.31968e-10	6.76923e-258	0.921052	0.499398	0.0617762	0.00211929	0.0872651	0.000784858	0.000458977	0.937543
OSER1	0	0	5.25744e-10	7.87962e-258	0.930565	0.491265	0.0600004	0.00210449	0.0873641	0.00380831	0.00222776	0.937543
RABGAP1L	0	0	5.23202e-10	7.60286e-258	0.931293	0.495174	0.059284	0.00203471	0.0873695	-0.00160076	0.000936418	0.937543
TRDMT1	0	0	5.2561e-10	9.24825e-258	0.929121	0.494805	0.0620223	0.00214785	0.087374	0.00168384	0.000985032	0.937543
BOLL	0	0	5.12069e-10	6.56608e-258	0.930344	0.490916	0.0612128	0.00211506	0.0873788	-0.00250779	0.00146706	0.937543
TCF25	0	0	5.46032e-10	8.43135e-258	0.927509	0.499302	0.0612205	0.00195913	0.0874189	-0.00115212	0.000674075	0.937543
HTT	0	0	5.47285e-10	7.46008e-258	0.929864	0.492582	0.0606281	0.00213575	0.0874431	0.000715548	0.000418681	0.937543
SLC52A3	0	0	5.17129e-10	6.75212e-258	0.934033	0.488431	0.0605841	0.00212001	0.087469	0.00145532	0.000851605	0.937543
SULT1C2	0	0	5.02204e-10	7.03667e-258	0.92537	0.49264	0.0604483	0.00200906	0.0875192	0.000904348	0.000529278	0.937543
PGP	0	0	5.14004e-10	7.11265e-258	0.926004	0.486557	0.0610844	0.00208377	0.0875777	0.00389599	0.00228058	0.937543
TIGD7	0	0	5.2607e-10	6.71963e-258	0.93176	0.492415	0.0610458	0.00209313	0.0876252	0.00278588	0.00163101	0.937543
MOB3B	0	0	4.98364e-10	8.94824e-258	0.928584	0.49712	0.05948	0.00209917	0.0876318	0.00359347	0.00210386	0.937543
GALNT17	0	0	5.1003e-10	1.02097e-257	0.926395	0.493232	0.0612373	0.00216972	0.0877412	0.00163427	0.000957144	0.937543
ZRANB3	0	0	5.21022e-10	8.40067e-258	0.925426	0.491475	0.0613412	0.00196473	0.0877416	-0.0012366	0.000724239	0.937543
JADE3	0	0	5.06786e-10	6.87847e-258	0.925878	0.497689	0.0621957	0.00213201	0.0877678	0.00457773	0.00268126	0.937543
FYB	0	0	5.23732e-10	9.38374e-258	0.93031	0.497721	0.0611664	0.00200291	0.0878125	-0.00125071	0.00073267	0.937543
TEAD1	0	0	5.28516e-10	7.20904e-258	0.926212	0.497349	0.0607458	0.00209743	0.0878746	0.00330268	0.00193509	0.937545
STK26	0	0	5.29716e-10	7.20385e-258	0.928498	0.494423	0.0607106	0.00223179	0.0879138	-0.00122712	0.00071908	0.937545
TOP1MT	0	0	4.97105e-10	7.00549e-258	0.927985	0.495214	0.0605437	0.00214743	0.0880989	0.00110364	0.000647096	0.938497
ADAMTSL4	0	0	5.32284e-10	7.88795e-258	0.922919	0.498871	0.0611157	0.00219018	0.0881802	0.000833826	0.000489022	0.938497
PROKR1	0	0	5.45364e-10	6.59669e-258	0.922006	0.498345	0.0619443	0.00197501	0.0882254	-0.00187893	0.00110211	0.938497
OR13F1	0	0	5.29087e-10	8.86987e-258	0.917584	0.496702	0.0612162	0.0020317	0.0882304	-0.00191224	0.00112167	0.938497
PLEKHA1	0	0	5.32319e-10	7.18366e-258	0.924548	0.493646	0.0605945	0.00212711	0.0882618	0.00187086	0.0010975	0.938497
ZNF772	0	0	5.22592e-10	7.8246e-258	0.925566	0.493004	0.0624412	0.00198071	0.0883106	0.000582588	0.000341816	0.938497
IQCC	0	0	5.41158e-10	7.47163e-258	0.926148	0.492144	0.0611605	0.00232307	0.0883571	-0.000898732	0.000527382	0.938497
DCLRE1B	0	0	5.06651e-10	9.79092e-258	0.928599	0.496932	0.0609431	0.00200805	0.0885331	-0.00201975	0.00118586	0.938965
ITGB8	0	0	5.09328e-10	8.13768e-258	0.928624	0.499134	0.0611573	0.00217827	0.0885342	0.00227362	0.00133492	0.938965
MUC7	0	0	5.14129e-10	1.05736e-257	0.927464	0.497721	0.0618947	0.00196607	0.0885861	-0.0036827	0.00216258	0.938965
IER3	0	0	5.56519e-10	7.89957e-258	0.929052	0.493523	0.0614699	0.00199865	0.0886036	-0.00223988	0.00131539	0.938965
BLK	0	0	5.37472e-10	1.01792e-257	0.926327	0.494968	0.0611726	0.00205581	0.0887394	-0.000726054	0.000426564	0.939023
TFPI2	0	0	4.92159e-10	7.76444e-258	0.934674	0.499137	0.0603214	0.002091	0.0887507	0.00383331	0.00225219	0.939023
PNPLA7	0	0	5.21534e-10	6.32382e-258	0.92667	0.493611	0.0610451	0.0021244	0.0887789	-0.000838853	0.000492896	0.939023
MAP3K6	0	0	5.2644e-10	7.521e-258	0.929416	0.493179	0.0613443	0.00202472	0.0888776	-0.000815972	0.0004796	0.939023
NPY1R	0	0	5.16201e-10	8.45627e-258	0.929773	0.495342	0.0602724	0.00209479	0.0889083	-0.00261113	0.00153488	0.939023
SLC15A5	0	0	5.05575e-10	7.94808e-258	0.923431	0.495478	0.0616607	0.00183916	0.0889692	0.000903041	0.000530929	0.939023
ZNF112	0	0	5.15325e-10	8.60997e-258	0.929549	0.493119	0.0623442	0.00203654	0.0889801	-0.00273374	0.00160731	0.939023
IRF2BP2	0	0	5.52504e-10	8.87319e-258	0.926928	0.494559	0.0608854	0.00200071	0.0890139	-0.00267251	0.00157148	0.939023
CNPY3	0	0	5.27954e-10	7.60678e-258	0.923894	0.492943	0.0607662	0.00207215	0.0891049	-0.00355634	0.00209178	0.939449
ZDHHC21	0	0	5.28735e-10	8.30497e-258	0.933563	0.487855	0.0591342	0.00208609	0.0893275	0.00166304	0.000978854	0.940656
GRID2IP	0	0	5.43829e-10	1.36562e-257	0.928399	0.490894	0.0614973	0.00202263	0.0893321	0.00104166	0.000613125	0.940656
DYDC1	0	0	5.10709e-10	6.69617e-258	0.932179	0.495063	0.061514	0.00215855	0.0894359	0.00377692	0.00222382	0.940656
KIAA1958	0	0	5.1686e-10	8.1619e-258	0.927859	0.48437	0.0612014	0.00211529	0.0894748	-0.00295933	0.00174264	0.940656
MYLK4	0	0	5.38559e-10	6.78879e-258	0.927244	0.490424	0.0621168	0.00203116	0.0895785	-0.00128281	0.000755644	0.940656
ERCC2	0	0	5.15451e-10	8.25846e-258	0.927191	0.493212	0.0613223	0.00204626	0.0896123	-0.000943493	0.000555827	0.940656
ZNF235	0	0	5.19519e-10	8.70926e-258	0.927079	0.49296	0.0603961	0.00216113	0.0896856	0.0016199	0.000954529	0.940656
ZNF200	0	0	5.24986e-10	8.27686e-258	0.931475	0.495326	0.0608101	0.00223591	0.0897	0.00126879	0.000747668	0.940656
DGKG	0	0	5.07134e-10	6.92052e-258	0.939335	0.491331	0.0605578	0.0019711	0.0897596	0.00125532	0.000739871	0.940656
IL17RC	0	0	5.01497e-10	8.26928e-258	0.928031	0.491279	0.0605087	0.00202228	0.0897698	-0.00129056	0.000760661	0.940656
LY75	0	0	5.18309e-10	9.82306e-258	0.925024	0.49867	0.0608025	0.00216594	0.0897869	0.0125601	0.00740337	0.940656
TMEM74	0	0	5.33975e-10	6.85703e-258	0.927842	0.49593	0.0622568	0.00211022	0.0898535	-0.00293195	0.00172856	0.940656
SPRR4	0	0	5.1788e-10	7.81284e-258	0.924836	0.493929	0.0617638	0.00207979	0.090057	-0.0109456	0.0064572	0.940656
LGR5	0	0	5.54369e-10	8.72029e-258	0.918605	0.494991	0.0614507	0.00198886	0.0900914	-0.000826956	0.000487901	0.940656
SLC6A19	0	0	5.34412e-10	9.0247e-258	0.925584	0.494231	0.0608895	0.00204063	0.0901313	-0.00114828	0.000677563	0.940656
SPOCK2	0	0	5.3833e-10	1.01335e-257	0.92723	0.493595	0.0614922	0.00209401	0.0901658	-0.000900004	0.000531122	0.940656
OFD1	0	0	5.25052e-10	7.48721e-258	0.923312	0.496858	0.0619342	0.00202159	0.090197	0.00363829	0.00214728	0.940656
NIPAL3	0	0	5.31909e-10	9.38875e-258	0.930831	0.488116	0.0613939	0.00208743	0.0901976	0.00224876	0.0013272	0.940656
KLHDC1	0	0	5.33956e-10	9.32472e-258	0.93217	0.4943	0.0608887	0.0023218	0.090242	-0.00133644	0.000788866	0.940656
KLB	0	0	5.24994e-10	9.11834e-258	0.928874	0.49589	0.060885	0.00212659	0.0902724	-0.00139757	0.000825027	0.940656
KRR1	0	0	5.12694e-10	7.54084e-258	0.924279	0.494817	0.0614833	0.00206635	0.0904573	0.00327885	0.00193671	0.940656
ROCK2	0	0	5.42271e-10	8.64891e-258	0.928665	0.49805	0.0589667	0.00215851	0.0904659	0.00182907	0.0010804	0.940656
RBM3	0	0	5.40012e-10	6.75178e-258	0.925595	0.492219	0.060579	0.00204924	0.0904933	0.00921124	0.00544138	0.940656
ADGRG6	0	0	5.18803e-10	6.66567e-258	0.928695	0.497765	0.0605143	0.00200252	0.090511	-0.00112532	0.0006648	0.940656
ATP6V0D1	0	0	5.16387e-10	7.19184e-258	0.933633	0.49124	0.0611195	0.00205084	0.0905138	0.00490862	0.00289987	0.940656
GPR63	0	0	5.33628e-10	9.29702e-258	0.927815	0.4959	0.0611731	0.00208438	0.0905374	0.00207913	0.00122838	0.940656
TMEM86A	0	0	5.06976e-10	9.87925e-258	0.922315	0.495461	0.0606876	0.0020894	0.0906838	-0.00408499	0.00241456	0.940794
TYMS	0	0	5.28804e-10	8.66714e-258	0.931564	0.492665	0.0625008	0.00213483	0.0906918	0.00309748	0.00183091	0.940794
EPHA2	0	0	5.21266e-10	9.1114e-258	0.924474	0.494445	0.0610551	0.00203892	0.0907028	-0.000771556	0.00045608	0.940794
SMYD2	0	0	5.44214e-10	6.79069e-258	0.921618	0.496574	0.0616384	0.0020174	0.0909014	-0.00184004	0.00108835	0.941539
SRI	0	0	5.29308e-10	7.63637e-258	0.925876	0.494609	0.0612126	0.00204305	0.0909069	-0.0033185	0.00196286	0.941539
RNF135	0	0	5.24491e-10	9.70612e-258	0.931524	0.493562	0.0611568	0.00214656	0.0909953	0.0010477	0.000619874	0.941539
ARRDC4	0	0	5.23299e-10	1.02136e-257	0.929385	0.495447	0.0612096	0.00197639	0.0910358	-0.00143841	0.000851147	0.941539
HHLA3	0	0	5.34959e-10	7.30726e-258	0.931687	0.491883	0.0615547	0.00200085	0.0910603	0.013045	0.00771964	0.941539
ABRAXAS1	0	0	5.14523e-10	9.29413e-258	0.924343	0.497074	0.0608867	0.00182148	0.0910791	0.00104238	0.000616888	0.941539
SNAPC3	0	0	4.91132e-10	8.44576e-258	0.924526	0.493672	0.0610329	0.00212944	0.0911768	-0.00166141	0.000983527	0.942025
IFFO2	0	0	5.49131e-10	8.83386e-258	0.928189	0.495268	0.0609929	0.00208608	0.091333	0.00200918	0.00118998	0.942104
OR4D10	0	0	5.42025e-10	5.54372e-258	0.927764	0.491017	0.061508	0.00203024	0.0913387	-0.0023905	0.00141584	0.942104
PNLIPRP3	0	0	5.13619e-10	8.03045e-258	0.929715	0.494507	0.0600835	0.00217423	0.0913627	0.00247057	0.00146338	0.942104
CD79A	0	0	5.64293e-10	8.31749e-258	0.925993	0.496446	0.0618797	0.00202647	0.0914212	-0.00110778	0.000656283	0.942104
ARHGEF2	0	0	5.50911e-10	6.55394e-258	0.927583	0.493282	0.062332	0.00207123	0.0914383	-0.0017053	0.00101032	0.942104
SSR4	0	0	4.96061e-10	7.57792e-258	0.933408	0.491299	0.0612842	0.00204126	0.0915906	0.00743324	0.00440599	0.942725
RAVER2	0	0	5.07982e-10	8.9041e-258	0.924515	0.495478	0.0607159	0.00212616	0.0916002	0.00181405	0.00107529	0.942725
DDIT4L	0	0	5.21873e-10	7.32968e-258	0.925693	0.494042	0.0600376	0.00202315	0.0919529	-0.00135294	0.000802838	0.943939
C20orf173	0	0	5.23059e-10	7.28223e-258	0.932172	0.495164	0.0615059	0.00204443	0.0919964	-0.00904282	0.00536675	0.943939
CHD8	0	0	5.41136e-10	5.08037e-258	0.918747	0.496352	0.0606923	0.00211932	0.0920284	0.000954324	0.00056643	0.943939
MCC	0	0	5.39855e-10	7.98513e-258	0.927343	0.492991	0.0629028	0.00203069	0.0920627	-0.000931429	0.0005529	0.943939
SLC9A3R2	0	0	4.89e-10	6.39356e-258	0.934446	0.486717	0.0610742	0.00211667	0.0921087	-0.00088373	0.000524659	0.943939
RNPEPL1	0	0	5.27438e-10	6.55998e-258	0.929386	0.494645	0.0609359	0.00204916	0.0921167	-0.00250644	0.00148808	0.943939
HSPB6	0	0	5.15447e-10	9.53167e-258	0.928627	0.494577	0.0603471	0.00202044	0.0921267	-0.00283186	0.00168133	0.943939
AMPD3	0	0	5.19423e-10	8.75112e-258	0.923178	0.489021	0.0624107	0.00209661	0.0922072	-0.000788711	0.000468389	0.943939
G3BP1	0	0	5.24583e-10	8.63332e-258	0.928443	0.494414	0.0613935	0.00194551	0.0922325	0.00253522	0.0015057	0.943939
LY6K	0	0	5.17455e-10	8.42816e-258	0.928955	0.492784	0.0607138	0.00198625	0.0922983	-0.00341225	0.00202699	0.943939
ESCO1	0	0	5.17231e-10	7.83982e-258	0.930703	0.49259	0.0611851	0.00203083	0.0923119	-0.00175788	0.00104429	0.943939
NUFIP2	0	0	5.26106e-10	8.65956e-258	0.921604	0.493438	0.0606359	0.00202421	0.0923582	0.0029435	0.00174886	0.943939
RNF44	0	0	5.32153e-10	8.07406e-258	0.93007	0.495289	0.0606622	0.00201046	0.0924753	0.00168604	0.00100211	0.943939
CAMK2B	0	0	5.39854e-10	6.37762e-258	0.926835	0.492249	0.0604455	0.00201343	0.0925429	-0.00258933	0.0015393	0.943939
DSN1	0	0	5.18938e-10	7.25265e-258	0.935362	0.495835	0.0607139	0.00199362	0.0925506	-0.00185314	0.00110168	0.943939
LRRC3C	0	0	5.28222e-10	8.06446e-258	0.931538	0.492432	0.0599934	0.00210026	0.0926193	-0.00160841	0.000956388	0.943939
DNAH2	0	0	5.13315e-10	8.39281e-258	0.929441	0.493815	0.0622536	0.00200994	0.0926812	-0.00040956	0.000243578	0.943939
MKNK2	0	0	5.35656e-10	7.07705e-258	0.926563	0.49466	0.0616201	0.00215459	0.0926901	0.00167725	0.000997541	0.943939
FRRS1	0	0	5.26661e-10	6.80112e-258	0.922852	0.495972	0.0607725	0.0020054	0.0927262	-0.00149723	0.000890572	0.943939
PDE1A	0	0	5.18619e-10	8.55032e-258	0.924737	0.490763	0.0608215	0.00209578	0.0927899	0.00161045	0.000958103	0.943939
LCA5L	0	0	5.18871e-10	7.42742e-258	0.929316	0.495334	0.0605386	0.00205951	0.0928297	0.00138535	0.000824288	0.943939
FOS	0	0	5.12237e-10	9.05873e-258	0.927373	0.493958	0.0618022	0.00212672	0.0929025	-0.0013078	0.000778318	0.943939
AMTN	0	0	5.28015e-10	6.88318e-258	0.93009	0.489271	0.0613248	0.00203257	0.0929225	-0.00315386	0.00187708	0.943939
ARHGAP26	0	0	5.36848e-10	8.84982e-258	0.928991	0.491981	0.062234	0.00208133	0.0929391	0.00201697	0.0012005	0.943939
GBX1	0	0	5.2288e-10	7.27728e-258	0.930569	0.494197	0.0613562	0.0021208	0.0930053	0.00200449	0.00119331	0.944095
YWHAE	0	0	5.69521e-10	7.08985e-258	0.932399	0.49714	0.0612879	0.0019899	0.0931068	-0.00668453	0.00398068	0.944609
CASKIN2	0	0	5.33416e-10	9.22844e-258	0.928648	0.49742	0.0605663	0.00229177	0.0932233	-0.000644393	0.000383877	0.945274
C7orf50	0	0	5.27189e-10	7.95e-258	0.927528	0.488523	0.0611301	0.00204594	0.0932768	0.00276616	0.00164812	0.9453
CPM	0	0	5.08472e-10	6.28882e-258	0.923651	0.494088	0.0614638	0.00214646	0.093444	-0.0026952	0.00160666	0.94551
KLHL34	0	0	5.16835e-10	7.49684e-258	0.925594	0.493427	0.0615068	0.00213602	0.0934555	-0.00236355	0.00140901	0.94551
APOB	0	0	5.38472e-10	1.19764e-257	0.923749	0.493519	0.0603679	0.00212881	0.0935082	0.000564288	0.000336449	0.94551
S100A7	0	0	5.34873e-10	8.78249e-258	0.927826	0.493624	0.0611272	0.00209512	0.0935269	-0.00775405	0.00462351	0.94551
BLID	0	0	5.49183e-10	8.14436e-258	0.928104	0.492605	0.0608979	0.00214765	0.0936352	0.00957727	0.00571253	0.94551
DHX8	0	0	5.21e-10	5.67035e-258	0.927006	0.494012	0.0611434	0.00209364	0.0936506	0.00148465	0.000885587	0.94551
SIDT2	0	0	5.1446e-10	7.26692e-258	0.922319	0.496265	0.0608612	0.00216847	0.0937518	-0.000752709	0.000449126	0.94551
SLC2A3	0	0	5.19458e-10	8.91606e-258	0.921483	0.497869	0.0615287	0.00205277	0.0937563	0.00212108	0.00126562	0.94551
S100A11	0	0	5.10881e-10	9.06541e-258	0.930416	0.488179	0.0600695	0.00203658	0.0938293	-0.00451	0.00269166	0.94551
TPCN2	0	0	5.50874e-10	9.22041e-258	0.93354	0.500011	0.0609702	0.00208127	0.0938985	0.00102376	0.000611131	0.94551
BTG2	0	0	5.36704e-10	7.97456e-258	0.924624	0.498022	0.061038	0.0021007	0.0939076	-0.00351837	0.00210034	0.94551
OR52A5	0	0	5.37494e-10	8.13156e-258	0.923125	0.494034	0.0606836	0.00211728	0.0939562	0.00258621	0.0015441	0.94551
WDR46	0	0	5.31131e-10	8.20678e-258	0.927048	0.500409	0.0605716	0.00200631	0.0939599	0.00163218	0.000974503	0.94551
TRAIP	0	0	5.35826e-10	6.89344e-258	0.930528	0.49814	0.0608807	0.00207127	0.0941199	0.00183429	0.00109571	0.946607
HES4	0	0	5.41701e-10	9.72133e-258	0.92429	0.492215	0.0616616	0.00195424	0.0944455	0.00138324	0.000827092	0.948993
SPATA9	0	0	5.3392e-10	6.94444e-258	0.930737	0.494701	0.0611778	0.0020634	0.0944594	-0.00401728	0.00240219	0.948993
HIST1H4J	0	0	5.65102e-10	9.86839e-258	0.931033	0.499833	0.0607735	0.0020866	0.0945393	0.00701728	0.0041971	0.949281
KCNJ11	0	0	5.32265e-10	6.72879e-258	0.928894	0.494844	0.061907	0.002156	0.0946291	0.00256185	0.00153268	0.949355
C3orf20	0	0	5.23457e-10	8.67799e-258	0.932282	0.493844	0.0609182	0.00206261	0.0947958	0.00133203	0.00079732	0.949355
HOXD3	0	0	5.13229e-10	9.36051e-258	0.929916	0.493575	0.060401	0.00208129	0.0948409	0.00269873	0.00161561	0.949355
KCTD18	0	0	5.42971e-10	6.80152e-258	0.928306	0.493384	0.0607418	0.00197733	0.094868	-0.00179311	0.00107355	0.949355
GLUD2	0	0	5.26999e-10	6.97876e-258	0.929539	0.491246	0.061704	0.00211819	0.0948745	0.00306487	0.00183499	0.949355
GAPDH	0	0	5.19368e-10	6.58904e-258	0.930212	0.492911	0.0633826	0.00193157	0.0948832	-0.0048732	0.00291774	0.949355
GON4L	0	0	5.20877e-10	7.04966e-258	0.921027	0.498578	0.0598635	0.00197491	0.0950899	-0.000920418	0.000551429	0.949355
DNA2	0	0	5.27173e-10	9.24503e-258	0.92686	0.493433	0.0612827	0.00211775	0.0951215	0.00112466	0.000673857	0.949355
GOLGA6L2	0	0	5.09055e-10	9.19064e-258	0.926214	0.495051	0.0609824	0.00200398	0.0953545	0.00195374	0.00117143	0.949355
LGALS3	0	0	5.2036e-10	9.94814e-258	0.922659	0.495594	0.0611701	0.00215206	0.0953563	-0.00200099	0.00119977	0.949355
PPCDC	0	0	5.30217e-10	8.69223e-258	0.929139	0.495947	0.0625543	0.0020244	0.0953632	-0.00246029	0.0014752	0.949355
GP9	0	0	5.33447e-10	9.05544e-258	0.926563	0.492751	0.0613171	0.00204157	0.0954098	0.00320553	0.00192231	0.949355
ANKZF1	0	0	5.21569e-10	8.74517e-258	0.93333	0.489266	0.0602638	0.00203564	0.0954179	-0.000735635	0.000441161	0.949355
PTPRD	0	0	5.37765e-10	7.89002e-258	0.926543	0.492952	0.0607177	0.00200746	0.0956045	0.000857347	0.000514442	0.949355
LCMT1	0	0	5.07842e-10	7.19025e-258	0.925771	0.492389	0.0620005	0.00209911	0.0956487	0.00206063	0.00123663	0.949355
KDM6A	0	0	5.0208e-10	9.212e-258	0.92762	0.490367	0.0603788	0.0021155	0.0956753	0.00346691	0.00208072	0.949355
EGF	0	0	5.29549e-10	9.04052e-258	0.923006	0.492481	0.0612412	0.00206682	0.0957936	-0.00124646	0.00074835	0.949355
MGAT4D	0	0	5.37772e-10	8.83236e-258	0.923464	0.493338	0.0620261	0.00209538	0.095931	0.00559319	0.00335944	0.949355
TEX29	0	0	5.23133e-10	7.0101e-258	0.92384	0.494391	0.0616582	0.00206243	0.0959514	-0.0054856	0.00329502	0.949355
WASL	0	0	5.18918e-10	8.81347e-258	0.928538	0.495161	0.0604631	0.00205482	0.0960084	-0.00320639	0.0019263	0.949355
LSAMP	0	0	5.55075e-10	1.16758e-257	0.928637	0.495695	0.0600501	0.00200979	0.0960521	-0.00383938	0.00230688	0.949355
CD27	0	0	5.09288e-10	1.0136e-257	0.932745	0.496919	0.0593455	0.00210309	0.0960726	0.00369539	0.00222051	0.949355
CHRNA1	0	0	5.35383e-10	9.95824e-258	0.929358	0.497021	0.0603334	0.00204607	0.09615	0.00140531	0.000844628	0.949355
JOSD1	0	0	5.07039e-10	8.89051e-258	0.929226	0.492844	0.0608661	0.00206719	0.0962143	-0.00466477	0.00280419	0.949355
HPS4	0	0	5.51479e-10	7.17778e-258	0.929454	0.496366	0.0613002	0.00215055	0.0962909	-0.00155132	0.00093278	0.949355
CDK14	0	0	5.27877e-10	7.98791e-258	0.92505	0.498973	0.0606253	0.00204585	0.0963747	0.00196179	0.00117988	0.949355
SLC7A1	0	0	5.11303e-10	7.61863e-258	0.92337	0.495955	0.0610075	0.00214534	0.0963789	-0.00295844	0.00177932	0.949355
HAPLN3	0	0	5.24584e-10	6.31967e-258	0.926595	0.501433	0.0608077	0.00209968	0.0964411	0.000866808	0.00052143	0.949355
CCL4L1	0	0	5.19644e-10	8.58636e-258	0.929597	0.495275	0.0613184	0.00202335	0.0966317	18404.1	11077.3	0.949355
FGF6	0	0	5.03659e-10	1.0223e-257	0.927446	0.492234	0.0612092	0.00197547	0.0966844	0.00108092	0.000650704	0.949355
USP25	0	0	4.95066e-10	8.79125e-258	0.930866	0.494255	0.0602651	0.0020275	0.0967206	-0.00103402	0.000622536	0.949355
CFAP206	0	0	5.48985e-10	7.63665e-258	0.927737	0.500724	0.0612499	0.00213615	0.0968817	0.000895368	0.000539322	0.949355
RAB8A	0	0	5.41177e-10	8.18517e-258	0.930876	0.49946	0.06127	0.00211057	0.0971675	0.0045684	0.00275412	0.949355
HNRNPLL	0	0	5.22628e-10	8.03756e-258	0.930865	0.495977	0.0607859	0.00207624	0.0971686	-0.00255792	0.00154208	0.949355
SNAI3	0	0	5.28792e-10	8.38926e-258	0.923596	0.492867	0.060861	0.00200966	0.0971738	0.00110052	0.000663477	0.949355
PPP1R3B	0	0	5.2848e-10	1.14345e-257	0.926447	0.497249	0.0610723	0.0020916	0.0973829	-0.00394651	0.00238074	0.949355
TP63	0	0	4.91748e-10	8.38268e-258	0.928842	0.491947	0.0610822	0.00211167	0.0973989	-0.00205936	0.00124237	0.949355
ADAMTS4	0	0	5.16623e-10	7.29594e-258	0.928249	0.495248	0.0603991	0.00223214	0.0977109	-0.000957898	0.000578418	0.949355
FIP1L1	0	0	5.39181e-10	8.65968e-258	0.934057	0.493863	0.0618779	0.00203957	0.0977524	-0.00236947	0.00143096	0.949355
DNAAF1	0	0	5.1076e-10	7.7049e-258	0.929439	0.493378	0.0620115	0.00197302	0.0977592	-0.00115005	0.000694546	0.949355
SYCP2	0	0	5.03607e-10	1.14281e-257	0.927282	0.49462	0.0626592	0.00211613	0.0977779	0.00155445	0.000938827	0.949355
IL4	0	0	5.56855e-10	7.17733e-258	0.928541	0.494006	0.0606618	0.00206166	0.0978235	0.00650023	0.00392642	0.949355
ZNF878	0	0	5.39112e-10	8.88275e-258	0.932104	0.493386	0.0615768	0.00206163	0.0978432	-0.00215021	0.00129889	0.949355
TM4SF4	0	0	5.33114e-10	7.32586e-258	0.927	0.49187	0.0607863	0.00206768	0.097887	-0.0026836	0.00162132	0.949355
PRKCB	0	0	5.35123e-10	1.0212e-257	0.923985	0.494386	0.0603273	0.00217407	0.0979669	0.00174387	0.00105382	0.949355
ENTPD8	0	0	5.31875e-10	7.23814e-258	0.92671	0.489326	0.060427	0.00208073	0.0979955	-0.00173138	0.00104637	0.949355
ASNS	0	0	5.08781e-10	7.30142e-258	0.927218	0.488569	0.0613515	0.00208693	0.0980288	-0.00178585	0.00107939	0.949355
EVX1	0	0	5.235e-10	8.42838e-258	0.921132	0.495536	0.0612659	0.0019778	0.0980745	-0.00217859	0.00131695	0.949355
NEURL1B	0	0	5.13719e-10	7.79959e-258	0.922618	0.493435	0.0610724	0.00210567	0.0980847	-0.00244372	0.00147726	0.949355
SLC9A8	0	0	5.36033e-10	7.68243e-258	0.926999	0.49594	0.0615727	0.00210298	0.0982591	0.00182711	0.00110509	0.949355
DDX3X	0	0	5.1551e-10	8.42165e-258	0.933295	0.493581	0.0607473	0.00207371	0.0982899	-0.00959915	0.00580637	0.949355
VIPR2	0	0	5.26386e-10	9.48142e-258	0.931646	0.496053	0.0610046	0.00204221	0.0983371	-0.00167491	0.00101327	0.949355
ZNF223	0	0	5.41348e-10	8.99149e-258	0.927492	0.492301	0.0615232	0.00209834	0.098349	0.00147846	0.000894452	0.949355
FGF18	0	0	5.34324e-10	9.37923e-258	0.932559	0.492708	0.061152	0.00200067	0.0984292	-0.00298973	0.00180919	0.949355
KRT82	0	0	5.3302e-10	7.74015e-258	0.932697	0.496083	0.0609994	0.00207662	0.0984565	-0.000536734	0.000324822	0.949355
EIF1AD	0	0	5.41785e-10	7.39314e-258	0.926016	0.493509	0.0611496	0.00210622	0.0985008	0.00474931	0.00287458	0.949355
XRCC4	0	0	5.4508e-10	9.5567e-258	0.924919	0.493957	0.0619329	0.00206163	0.0985212	0.00161222	0.000975873	0.949355
RAD9B	0	0	5.269e-10	7.38856e-258	0.928907	0.489212	0.0609156	0.00213428	0.0985663	0.00179932	0.00108928	0.949355
RGPD4	0	0	5.05489e-10	6.30855e-258	0.923474	0.490899	0.0613635	0.00192779	0.0986286	0.000418143	0.000253182	0.949355
AKAP9	0	0	5.3893e-10	7.55857e-258	0.926345	0.491828	0.0606818	0.00215763	0.0986308	-0.000569896	0.00034507	0.949355
NAV3	0	0	5.42854e-10	8.45197e-258	0.929346	0.493351	0.0611347	0.00221672	0.0988214	-0.000888148	0.000538074	0.949355
STX18	0	0	5.29098e-10	9.44784e-258	0.927704	0.491864	0.0610858	0.00199684	0.098878	0.00239998	0.00145425	0.949355
WDFY4	0	0	5.36666e-10	8.54e-258	0.931414	0.494656	0.0612209	0.00210964	0.0988875	-0.000705631	0.000427582	0.949355
SIAH1	0	0	5.26377e-10	7.06216e-258	0.92968	0.492963	0.0609383	0.00211964	0.0988896	-0.00814642	0.00493641	0.949355
PRSS21	0	0	5.20587e-10	9.63581e-258	0.936052	0.495292	0.0617724	0.00206095	0.0989414	0.00202607	0.00122791	0.949355
GNL3	0	0	5.10142e-10	8.2703e-258	0.926294	0.493522	0.0595823	0.00210272	0.0989469	0.00192697	0.00116787	0.949355
KCNS1	0	0	5.15244e-10	7.25749e-258	0.928792	0.491763	0.0614746	0.00212457	0.0989901	-0.0011705	0.000709489	0.949355
STOX2	0	0	5.30742e-10	8.87362e-258	0.924932	0.489652	0.0603712	0.00213566	0.0990272	-0.00109045	0.000661037	0.949355
PPP1R14C	0	0	5.21521e-10	9.69028e-258	0.922711	0.496516	0.0606559	0.00212347	0.0990605	0.00241888	0.00146649	0.949355
BICD2	0	0	5.25187e-10	8.45116e-258	0.929196	0.49319	0.0615707	0.00210693	0.099085	0.00170942	0.00103644	0.949355
ZBED9	0	0	4.84267e-10	8.27139e-258	0.925687	0.499643	0.0605514	0.00229958	0.0990924	-0.00124797	0.000756676	0.949355
HAS1	0	0	5.41596e-10	1.02811e-257	0.928546	0.49044	0.0616316	0.00204224	0.0991057	-0.000702617	0.000426031	0.949355
SETD6	0	0	4.97206e-10	6.71407e-258	0.925163	0.499912	0.0609282	0.00202116	0.0991764	-0.00171423	0.00103964	0.949355
C15orf39	0	0	5.24198e-10	9.0846e-258	0.928953	0.493004	0.0615701	0.00199103	0.0991812	-0.000743142	0.000450704	0.949355
LCTL	0	0	5.24158e-10	6.43608e-258	0.927667	0.494445	0.0618693	0.00217398	0.0992241	0.000912818	0.000553681	0.949355
HIST1H2AE	0	0	5.2519e-10	6.4427e-258	0.925385	0.49741	0.0612918	0.00210792	0.09925	0.00610779	0.00370504	0.949355
SLC35D1	0	0	4.9828e-10	7.22926e-258	0.927738	0.497838	0.0605907	0.00208623	0.099264	-0.00208987	0.00126779	0.949355
CCL15	0	0	5.07331e-10	9.40745e-258	0.924695	0.491986	0.059986	0.00210506	0.0993742	-0.00336673	0.00204303	0.949355
TTBK1	0	0	5.40504e-10	7.5775e-258	0.93222	0.494896	0.061619	0.00205965	0.0995961	-0.000942839	0.000572519	0.949355
CYP4F8	0	0	5.23445e-10	9.02387e-258	0.932908	0.494063	0.059806	0.00201975	0.0996106	0.00909797	0.00552479	0.949355
XXYLT1	0	0	5.09264e-10	8.35637e-258	0.930953	0.490194	0.0617289	0.00209379	0.0996676	-0.00109736	0.000666492	0.949355
PEX5	0	0	5.34946e-10	1.07725e-257	0.923102	0.497164	0.0609672	0.00195505	0.0998025	-0.00164221	0.000997806	0.949355
HSPBAP1	0	0	5.29925e-10	9.6515e-258	0.932335	0.497615	0.0606778	0.00203573	0.0998197	-0.0021129	0.00128386	0.949355
UQCRC1	0	0	5.33621e-10	8.02644e-258	0.926822	0.497244	0.0617838	0.00197717	0.0998658	-0.00113714	0.000691052	0.949355
ATP8B2	0	0	5.34592e-10	5.77145e-258	0.927349	0.492675	0.0605702	0.00201976	0.09987	-0.00103966	0.000631819	0.949355
WDPCP	0	0	5.38603e-10	7.97872e-258	0.931604	0.495173	0.0608571	0.0021005	0.0999177	0.00113733	0.000691276	0.949355
ARPC3	0	0	5.39883e-10	6.40431e-258	0.927762	0.489849	0.0608027	0.00206155	0.0999592	-0.00169746	0.00103185	0.949355
TNS4	0	0	5.46999e-10	6.51027e-258	0.932676	0.493393	0.0614019	0.0020726	0.100059	-0.000996668	0.000606033	0.949355
MAGEB10	0	0	5.19936e-10	8.04657e-258	0.925485	0.489678	0.0615136	0.00204057	0.100089	-0.00928052	0.00564359	0.949355
JTB	0	0	5.09999e-10	8.59361e-258	0.926506	0.496869	0.0603703	0.00204022	0.100098	-0.00205079	0.00124715	0.949355
EMID1	0	0	5.40225e-10	1.16046e-257	0.92696	0.494267	0.0608474	0.00205862	0.100136	-0.00269897	0.00164151	0.949355
SLC20A1	0	0	5.26983e-10	7.18107e-258	0.927715	0.493321	0.0611661	0.00207789	0.100164	-0.00218013	0.00132606	0.949355
COL10A1	0	0	5.34376e-10	7.64586e-258	0.921464	0.497819	0.0614919	0.00211052	0.100201	-0.00171082	0.00104071	0.949355
FAM129A	0	0	5.42693e-10	6.85322e-258	0.935351	0.490968	0.0603351	0.0020228	0.100219	-0.000997082	0.000606571	0.949355
FICD	0	0	5.1815e-10	8.98603e-258	0.935058	0.491019	0.0607546	0.00194306	0.10026	0.00161585	0.000983112	0.949355
ONECUT1	0	0	5.52483e-10	1.00566e-257	0.92486	0.496055	0.0595484	0.0020563	0.100275	-0.00183663	0.00111749	0.949355
RPAP1	0	0	5.24896e-10	7.34948e-258	0.927441	0.49325	0.0606029	0.00218555	0.100293	0.000698585	0.000425074	0.949355
GPR119	0	0	5.04489e-10	7.80572e-258	0.932436	0.494221	0.0612706	0.00214957	0.100312	0.00403448	0.00245503	0.949355
ACER1	0	0	5.19807e-10	7.15015e-258	0.927088	0.492025	0.0607306	0.00205377	0.100328	-0.00172251	0.00104821	0.949355
PMF1	0	0	5.15682e-10	8.57618e-258	0.925983	0.493653	0.060973	0.00201343	0.100335	-0.0138519	0.0084296	0.949355
METTL23	0	0	5.18043e-10	1.00501e-257	0.930122	0.489905	0.0604202	0.00208702	0.100363	0.00143345	0.000872401	0.949355
MRPL57	0	0	5.16461e-10	9.42111e-258	0.929464	0.491235	0.0616905	0.0020876	0.10039	0.00147195	0.000895902	0.949355
FAM171A2	0	0	5.08278e-10	9.22e-258	0.934056	0.489949	0.0609369	0.00194741	0.100405	-0.00157205	0.000956874	0.949355
NR0B2	0	0	5.18208e-10	7.41163e-258	0.925197	0.489491	0.0613026	0.00214832	0.100509	0.0025576	0.00155723	0.949355
SLC45A3	0	0	5.35538e-10	9.59098e-258	0.924166	0.494772	0.0611362	0.00210165	0.10057	-0.00145328	0.000885009	0.949355
SF3B2	0	0	5.34063e-10	6.63634e-258	0.92577	0.495913	0.0610061	0.00206849	0.100674	-0.00106122	0.000646453	0.949355
SLC1A7	0	0	5.08035e-10	8.57939e-258	0.930617	0.49548	0.0615645	0.00204955	0.10083	-0.000961063	0.00058571	0.949355
HSP90AA1	0	0	5.48037e-10	1.01095e-257	0.928155	0.491522	0.0616741	0.00200443	0.100868	-0.0026882	0.00163848	0.949355
FOXJ1	0	0	5.20249e-10	6.36692e-258	0.931788	0.493178	0.0619873	0.00203457	0.100881	0.00244949	0.00149304	0.949355
C5orf34	0	0	5.32085e-10	8.3016e-258	0.925508	0.4927	0.0609934	0.00213925	0.100983	-0.00157348	0.000959373	0.949355
WNT3A	0	0	5.33566e-10	9.19105e-258	0.930827	0.499644	0.0609691	0.00199411	0.101012	0.00269085	0.00164078	0.949355
NRTN	0	0	5.2051e-10	8.40407e-258	0.924524	0.49029	0.0622654	0.00204203	0.101049	-0.00187202	0.00114162	0.949355
LLGL2	0	0	5.35402e-10	7.87899e-258	0.93175	0.491162	0.0621976	0.00206949	0.101052	0.000785819	0.00047922	0.949355
RBM25	0	0	5.311e-10	9.79879e-258	0.924501	0.493021	0.0613389	0.00206109	0.101066	-0.00391818	0.00238955	0.949355
KCNN3	0	0	5.48163e-10	9.44965e-258	0.929486	0.495152	0.0607435	0.00206013	0.101079	-0.00206938	0.00126208	0.949355
ENDOU	0	0	5.38545e-10	9.03664e-258	0.928894	0.494857	0.0611285	0.0020623	0.101122	0.000889691	0.000542677	0.949355
PCDHB5	0	0	5.23136e-10	8.95498e-258	0.931875	0.492779	0.0613038	0.00210178	0.101123	-0.0013698	0.000835528	0.949355
ZNF318	0	0	5.12191e-10	6.76647e-258	0.939418	0.49008	0.0611887	0.00213118	0.101127	0.000805099	0.000491085	0.949355
NUSAP1	0	0	5.31745e-10	7.01149e-258	0.925397	0.496895	0.0619367	0.00207976	0.101132	0.0021992	0.00134147	0.949355
RHOV	0	0	5.34261e-10	7.22855e-258	0.93445	0.49654	0.0610133	0.00209706	0.101174	0.00456644	0.00278578	0.949355
ONECUT3	0	0	5.37621e-10	8.8825e-258	0.925163	0.492253	0.0613981	0.00207467	0.101188	-0.00273798	0.00167038	0.949355
GAL3ST3	0	0	5.03188e-10	1.0865e-257	0.925826	0.496229	0.06081	0.00207441	0.101196	0.00153321	0.000935403	0.949355
FOXP1	0	0	5.03099e-10	7.69161e-258	0.930671	0.49879	0.0609633	0.00217392	0.10121	0.00185923	0.00113435	0.949355
HHIP	0	0	5.37205e-10	7.5342e-258	0.925161	0.494195	0.061491	0.00209964	0.101351	-0.00201946	0.00123262	0.949355
KLHL36	0	0	5.29366e-10	8.16119e-258	0.927328	0.495803	0.0610068	0.0019755	0.101367	0.0013442	0.000820498	0.949355
USP22	0	0	5.18964e-10	6.77917e-258	0.924894	0.492798	0.061051	0.00207656	0.101508	0.00427596	0.00261112	0.949355
SLC6A16	0	0	5.05606e-10	7.48072e-258	0.93233	0.49588	0.0605115	0.00216966	0.10151	-0.00168565	0.00102935	0.949355
LAX1	0	0	4.97927e-10	6.63203e-258	0.930172	0.493581	0.0609281	0.00203164	0.101527	0.00365782	0.00223378	0.949355
TRAF3	0	0	5.30878e-10	6.62535e-258	0.925453	0.50029	0.0609969	0.00203098	0.101542	0.00133938	0.000817974	0.949355
FRMD5	0	0	5.16489e-10	6.18232e-258	0.928409	0.493836	0.0611638	0.00207611	0.101617	0.00120871	0.000738336	0.949355
CPD	0	0	5.01623e-10	8.20898e-258	0.926424	0.495704	0.0617625	0.00204627	0.101625	-0.00104911	0.000640858	0.949355
UTP4	0	0	5.14278e-10	7.16746e-258	0.929954	0.496825	0.0613717	0.00209694	0.101681	-0.00102758	0.000627807	0.949355
OR10A3	0	0	5.50228e-10	9.49937e-258	0.928094	0.496685	0.0612779	0.00209661	0.101726	-0.00125104	0.00076444	0.949355
GZMA	0	0	5.09503e-10	8.41836e-258	0.926029	0.492982	0.0600022	0.00208189	0.101747	0.00163553	0.000999436	0.949355
EML3	0	0	5.17531e-10	9.99254e-258	0.933997	0.493306	0.0601745	0.00208671	0.101793	-0.0012304	0.000751975	0.949355
CIRBP	0	0	5.31278e-10	9.80347e-258	0.927113	0.49582	0.0604443	0.00208277	0.101814	-0.00453241	0.00277019	0.949355
TYW5	0	0	4.8977e-10	9.50224e-258	0.922786	0.493026	0.0610988	0.00208268	0.101831	0.00198887	0.00121565	0.949355
TIMM13	0	0	5.04621e-10	8.862e-258	0.930191	0.490197	0.060305	0.0020387	0.101867	0.00641851	0.00392359	0.949355
TBX6	0	0	5.18799e-10	1.00741e-257	0.925937	0.491564	0.0612194	0.00214309	0.101878	-0.000744486	0.000455113	0.949355
C6orf106	0	0	5.43144e-10	7.69493e-258	0.926051	0.492632	0.0611487	0.00205278	0.101957	-0.00590529	0.00361081	0.949355
C17orf58	0	0	5.10862e-10	7.38586e-258	0.92725	0.493852	0.0611586	0.0020186	0.10211	0.00700153	0.00428301	0.949355
FRG1	0	0	5.31098e-10	8.98667e-258	0.930566	0.495489	0.0617374	0.00212112	0.102183	0.00232608	0.00142322	0.949355
NDUFA3	0	0	4.87443e-10	7.59876e-258	0.925858	0.488693	0.0609158	0.00211055	0.102187	0.00608287	0.00372189	0.949355
CDC42EP3	0	0	5.30828e-10	7.3069e-258	0.930278	0.495258	0.0606056	0.00216144	0.102204	0.00386122	0.00236265	0.949355
CRIP1	0	0	5.28222e-10	8.87261e-258	0.928757	0.495376	0.0617805	0.00201419	0.102212	0.0011754	0.000719238	0.949355
MED8	0	0	5.30541e-10	8.54999e-258	0.929849	0.492707	0.0605698	0.00207177	0.102239	-0.0022388	0.00137005	0.949355
SRGAP3	0	0	5.37761e-10	1.10653e-257	0.930386	0.494763	0.0607442	0.00201404	0.102322	0.000941986	0.000576593	0.949355
BACE1	0	0	5.30105e-10	8.56717e-258	0.929989	0.495009	0.0615968	0.00199759	0.102554	-0.00191939	0.00117566	0.949355
UBE2I	0	0	5.35709e-10	6.19145e-258	0.93131	0.493282	0.061779	0.00207257	0.102656	0.0149015	0.00913011	0.949355
SPAG7	0	0	5.10715e-10	8.95099e-258	0.92726	0.493391	0.0621808	0.00200278	0.102727	0.00194677	0.00119303	0.949355
[truncated: 16,558 more rows]

## Sheet: Table S26 total_protein
Table S26. The summary statitics for the association analysis of total protein.
genes	const_pval	sex	age	bmi	PC1	PC2	PC3	PC4	p_value	beta_coef	std_err	fdr_bh_adj_pval
FCGRT	0	1.5764e-21	3.52072e-107	7.75573e-13	0.0256503	0.28809	0.785267	0.00489358	6.33164e-56	-0.01078	0.000683927	1.1749e-51
TNFRSF13B	0	3.34773e-21	9.45923e-108	2.63122e-13	0.025999	0.312719	0.802516	0.00167787	6.0022e-42	-0.00717661	0.000528676	5.56884e-38
SNX8	0	1.69346e-21	4.42085e-107	3.74771e-13	0.0275399	0.282534	0.772676	0.00287293	8.36418e-16	-0.00403236	0.000500935	5.17353e-12
IQGAP2	0	1.34142e-21	3.02968e-107	3.53632e-13	0.0249032	0.273591	0.777968	0.00288889	1.34892e-10	-0.00269842	0.000420183	6.25765e-07
PKD1	0	2.16487e-21	2.48222e-107	4.84036e-13	0.0266088	0.287198	0.805858	0.00264305	5.0383e-08	-0.00135071	0.000247826	0.000186982
STAB1	0	1.68192e-21	2.54347e-107	4.78389e-13	0.0255513	0.283324	0.810268	0.00337724	1.2601e-07	0.00158065	0.000299092	0.000389708
TNFRSF17	0	1.39278e-21	2.7839e-107	4.2816e-13	0.0261132	0.281075	0.792576	0.0028378	3.52819e-06	-0.00659033	0.00142107	0.00935272
OMA1	0	1.55361e-21	1.23909e-107	4.62715e-13	0.0273473	0.265543	0.812539	0.00324981	3.41782e-05	0.00326629	0.000788233	0.0769877
A1CF	0	1.44158e-21	1.88596e-107	4.59067e-13	0.0276587	0.266916	0.810281	0.00282258	3.73404e-05	0.00288379	0.000699358	0.0769877
C3	0	1.59492e-21	2.42857e-107	4.20135e-13	0.0273187	0.283396	0.813344	0.00317294	5.70543e-05	-0.00258811	0.000643042	0.10587
TNXB	0	1.71474e-21	3.53634e-107	4.95306e-13	0.0275927	0.275896	0.809195	0.0033419	8.52427e-05	0.00108957	0.000277295	0.143797
MUSTN1	0	1.73434e-21	2.59181e-107	4.34954e-13	0.0259185	0.27263	0.809745	0.00311263	0.000106579	-0.0183509	0.00473546	0.164807
OR2T35	0	2.11531e-21	2.85736e-107	4.61215e-13	0.0273764	0.277935	0.815246	0.00283118	0.000163009	-0.00548616	0.00145504	0.232676
SERPINF2	0	1.64185e-21	2.17979e-107	4.58471e-13	0.0264083	0.268197	0.808066	0.00304034	0.000205291	0.0059306	0.00159746	0.254791
RFPL2	0	1.69512e-21	3.1316e-107	4.55597e-13	0.0270887	0.270228	0.800064	0.00301541	0.000205964	0.00467694	0.00126006	0.254791
ZBTB8B	0	1.86421e-21	2.66375e-107	4.03754e-13	0.0271451	0.27361	0.818	0.00310436	0.000239767	-0.00330445	0.000899651	0.257039
IFIT1B	0	1.73991e-21	4.09607e-107	4.89209e-13	0.0270892	0.274896	0.800866	0.00268474	0.000251297	0.00685157	0.00187149	0.257039
EIF2AK3	0	1.74912e-21	2.14006e-107	4.78412e-13	0.0267457	0.275087	0.80528	0.00281791	0.000258701	-0.00233787	0.000639884	0.257039
TRA2B	0	1.61567e-21	2.74034e-107	4.29984e-13	0.0255222	0.278604	0.803583	0.00307052	0.000266002	0.013364	0.00366497	0.257039
PIK3R6	0	1.57803e-21	1.49282e-107	4.74253e-13	0.0275151	0.261637	0.812552	0.00299527	0.000292514	0.00166565	0.000459879	0.257039
USP28	0	1.6898e-21	2.99722e-107	4.35068e-13	0.0261031	0.275917	0.811099	0.00307187	0.000298187	-0.00189128	0.000522892	0.257039
SPON1	0	1.74984e-21	3.0587e-107	4.61087e-13	0.0265272	0.273499	0.803203	0.00343287	0.000312658	0.00572917	0.00158937	0.257039
RPS6KC1	0	1.79298e-21	2.23229e-107	4.97594e-13	0.0269329	0.28028	0.805758	0.00320486	0.000318598	-0.00187913	0.000522012	0.257039
UVRAG	0	1.95483e-21	1.98788e-107	4.58342e-13	0.026503	0.276134	0.813965	0.00298047	0.000352523	0.00282302	0.000790014	0.272559
OTULIN	0	2.06763e-21	2.93033e-107	4.12698e-13	0.0267641	0.276844	0.80517	0.00276486	0.000419545	-0.00518309	0.00146932	0.311403
CUTA	0	1.74802e-21	1.83442e-107	4.26376e-13	0.0268441	0.278009	0.806592	0.00315489	0.000516363	0.00422801	0.00121767	0.368525
KCNJ10	0	1.69348e-21	4.09889e-107	4.51205e-13	0.0257653	0.276716	0.796788	0.00274519	0.000550091	0.00356811	0.00103269	0.378055
TNFRSF10C	0	1.77637e-21	2.62307e-107	5.146e-13	0.026253	0.270293	0.809838	0.00318118	0.000659912	-0.0121334	0.00356259	0.437333
FAM163A	0	1.74647e-21	2.55783e-107	4.17456e-13	0.0261715	0.274696	0.828742	0.00302601	0.000693158	-0.00706348	0.00208218	0.439688
FGFBP1	0	1.75034e-21	2.48146e-107	4.80158e-13	0.0262018	0.273062	0.805817	0.00305098	0.00077272	-0.00460748	0.00137027	0.439688
NEUROG1	0	1.69007e-21	2.41819e-107	4.30209e-13	0.0263181	0.275248	0.798192	0.00300812	0.000783741	-0.00696452	0.00207367	0.439688
C11orf57	0	1.81421e-21	2.13033e-107	4.81065e-13	0.0281883	0.271455	0.820447	0.00306466	0.00082463	0.00197911	0.000591759	0.439688
RPL13A	0	1.6716e-21	2.57489e-107	4.35916e-13	0.0271799	0.275731	0.814443	0.00313731	0.000825935	0.00471042	0.00140861	0.439688
USP13	0	1.81264e-21	2.9671e-107	4.65709e-13	0.0276665	0.271059	0.811743	0.00280679	0.000833244	0.00202118	0.000604859	0.439688
ADAMTS1	0	1.84986e-21	2.43409e-107	4.71207e-13	0.026429	0.273528	0.797446	0.00266088	0.00086237	0.00109811	0.000329561	0.439688
WDR62	0	2.04051e-21	2.93261e-107	3.91984e-13	0.0269157	0.278401	0.79742	0.00258723	0.000872645	-0.00155566	0.000467343	0.439688
SLC35C2	0	1.7839e-21	3.56474e-107	4.10754e-13	0.0268668	0.274235	0.810678	0.00297018	0.000876722	-0.00358928	0.0010787	0.439688
TRIM58	0	1.64645e-21	1.86089e-107	4.40724e-13	0.0268378	0.276486	0.796204	0.00271461	0.000946412	-0.00237108	0.000717193	0.443371
SLC22A31	0	1.83119e-21	2.59518e-107	4.49332e-13	0.0263497	0.282745	0.807137	0.00315916	0.000965682	0.00371927	0.00112691	0.443371
PTPRB	0	1.55787e-21	3.92166e-107	4.34942e-13	0.0266692	0.281389	0.804198	0.0028624	0.000989251	-0.0011778	0.0003576	0.443371
ANKFY1	0	1.7902e-21	2.41905e-107	4.60626e-13	0.0259695	0.278047	0.801359	0.00280831	0.000993072	0.0022046	0.000669574	0.443371
NKD2	0	1.8903e-21	1.92911e-107	4.487e-13	0.0257634	0.274161	0.805577	0.00298116	0.00103839	-0.00334045	0.00101844	0.443371
ASS1	0	1.68822e-21	2.79557e-107	4.97736e-13	0.0268357	0.270716	0.809876	0.00284149	0.00104286	-0.00298256	0.000909661	0.443371
TMEM176A	0	1.72413e-21	3.82878e-107	4.61848e-13	0.0270831	0.268342	0.809168	0.00302041	0.00105132	-0.00428686	0.00130837	0.443371
IFNA6	0	1.77221e-21	4.25201e-107	4.30199e-13	0.0260869	0.276993	0.798787	0.00288393	0.00112681	-0.00503018	0.00154449	0.464648
VEGFC	0	1.72958e-21	2.47509e-107	4.30863e-13	0.0268051	0.274867	0.814743	0.00289607	0.00118314	-0.00134281	0.000414066	0.467154
TCF20	0	1.96925e-21	2.75752e-107	4.68363e-13	0.0260813	0.274628	0.808893	0.00282761	0.00119875	-0.00201549	0.000622209	0.467154
HLA-DPB1	0	1.83777e-21	2.55221e-107	4.9406e-13	0.0258823	0.278278	0.803462	0.00303491	0.00121231	-0.00599734	0.0018533	0.467154
ACOD1	0	2.03442e-21	2.30631e-107	4.63214e-13	0.0263596	0.271264	0.806819	0.0030764	0.00125812	0.00429619	0.00133197	0.467154
PTPRA	0	1.71831e-21	3.30983e-107	4.85819e-13	0.0268907	0.274605	0.798928	0.00283862	0.00125877	-0.00230655	0.000715147	0.467154
FAF1	0	1.87857e-21	3.34127e-107	4.37808e-13	0.0272326	0.274352	0.807276	0.00307203	0.00129247	0.00284376	0.000883784	0.470255
CGB1	0	1.48077e-21	2.81732e-107	4.55654e-13	0.0264613	0.27343	0.822679	0.00290661	0.00133122	0.00465336	0.00145	0.475041
TMEM132A	0	1.59855e-21	2.85126e-107	4.33299e-13	0.0259207	0.275005	0.811527	0.00285502	0.00140604	-0.00160076	0.00050126	0.486636
TEX35	0	2.00972e-21	2.01953e-107	4.55804e-13	0.0267045	0.280181	0.817491	0.00307534	0.00141616	-0.00194508	0.000609476	0.486636
GNG5	0	1.96031e-21	2.37274e-107	4.88319e-13	0.026332	0.273945	0.802735	0.00293798	0.00146327	0.0152963	0.00480723	0.48906
CRX	0	1.76651e-21	2.20226e-107	4.55778e-13	0.026705	0.272511	0.809236	0.00291609	0.00147593	0.00466072	0.0014659	0.48906
STARD6	0	1.78428e-21	2.37022e-107	4.66119e-13	0.0263413	0.274326	0.807753	0.00290534	0.00156648	-0.00480076	0.0015182	0.505401
CTSZ	0	1.80877e-21	4.00658e-107	4.19775e-13	0.0253496	0.271889	0.802906	0.00262319	0.00157972	0.00193456	0.000612265	0.505401
CBY1	0	1.88704e-21	2.05275e-107	4.46217e-13	0.0264503	0.273817	0.814036	0.00317911	0.0016538	0.00326798	0.00103867	0.520134
RAP2C	0	2.25312e-21	3.82514e-107	4.65776e-13	0.025814	0.267851	0.803143	0.00297882	0.00173874	-0.0276621	0.00883313	0.527024
USP16	0	1.78113e-21	3.00844e-107	4.63422e-13	0.0265602	0.267773	0.809645	0.00299984	0.00174109	0.00257996	0.000823945	0.527024
SCML2	0	2.85258e-21	2.20367e-107	4.24846e-13	0.0264074	0.271392	0.804119	0.00290102	0.00179809	-0.0116884	0.00374417	0.527024
ASPRV1	0	1.51584e-21	2.50477e-107	4.49434e-13	0.0268251	0.268891	0.803109	0.00331508	0.00180856	0.00423552	0.00135752	0.527024
ZNF709	0	1.61271e-21	2.86822e-107	5.27328e-13	0.0266752	0.2694	0.828617	0.00320031	0.00184997	0.00314366	0.00100973	0.527024
CADPS	0	1.86464e-21	2.01146e-107	3.6215e-13	0.0269914	0.268535	0.804141	0.00312987	0.00187862	-0.00206207	0.000663294	0.527024
TCF21	0	1.78615e-21	3.07058e-107	4.87914e-13	0.0262446	0.271724	0.811092	0.0034603	0.0019128	-0.00423667	0.00136513	0.527024
BTN2A2	0	1.54318e-21	2.71182e-107	4.32692e-13	0.0264481	0.276827	0.806633	0.00286954	0.00191552	0.00162184	0.000522654	0.527024
LMF2	0	1.76861e-21	3.03286e-107	4.68627e-13	0.0263896	0.27769	0.807479	0.00299549	0.00193218	0.0017359	0.000559873	0.527024
NCOA7	0	1.9353e-21	2.4744e-107	4.45601e-13	0.0260005	0.275259	0.806238	0.00270856	0.0019773	-0.00201679	0.000651908	0.527024
POLH	0	1.64661e-21	2.43512e-107	4.4444e-13	0.0273025	0.275003	0.803059	0.00297811	0.00201041	0.00177316	0.000574072	0.527024
MET	0	1.68414e-21	2.67307e-107	4.03144e-13	0.0260602	0.284013	0.805309	0.00283361	0.00201653	-0.0018576	0.000601586	0.527024
RER1	0	1.56623e-21	3.16153e-107	4.24981e-13	0.0260634	0.275757	0.811792	0.00300732	0.00204859	0.0107611	0.00349028	0.527967
PCSK9	0	1.95353e-21	2.35427e-107	3.89592e-13	0.0263139	0.276803	0.807515	0.00292748	0.00213068	-0.00226385	0.000737066	0.532803
IL15RA	0	1.66257e-21	2.96647e-107	4.93724e-13	0.0266112	0.274545	0.807928	0.00311641	0.00213555	0.00276551	0.000900597	0.532803
TNFSF13	0	1.63393e-21	2.1986e-107	4.24315e-13	0.0273242	0.278558	0.804401	0.00283393	0.00215349	-0.00905446	0.00295101	0.532803
FILIP1	0	1.953e-21	3.102e-107	4.6925e-13	0.0269363	0.278174	0.806209	0.00297312	0.00229757	0.00139398	0.000457215	0.552026
HIST1H2AE	0	1.66519e-21	2.73332e-107	4.95385e-13	0.0260058	0.278886	0.804979	0.00303952	0.0023001	0.0102523	0.00336305	0.552026
CIAO1	0	1.70805e-21	2.92081e-107	4.46049e-13	0.0258309	0.279284	0.805558	0.00301395	0.00234473	0.00215666	0.000708787	0.552026
ZNF621	0	1.81074e-21	3.36496e-107	4.80445e-13	0.0259225	0.277545	0.83144	0.00305771	0.00235019	-0.00489149	0.00160796	0.552026
CACNA1A	0	1.86807e-21	2.47014e-107	4.35065e-13	0.0275617	0.273742	0.81102	0.00305	0.00240671	0.00134919	0.00044456	0.556454
KRT40	0	1.87708e-21	2.90653e-107	4.23856e-13	0.0254842	0.278043	0.814447	0.0034825	0.00247545	-0.00148313	0.000490068	0.556454
ZMYM2	0	1.86034e-21	2.62775e-107	4.38089e-13	0.0265972	0.271105	0.807756	0.00285111	0.00248649	-0.00247553	0.000818346	0.556454
MBNL2	0	1.76909e-21	2.22853e-107	4.70812e-13	0.0261282	0.281774	0.816638	0.00302281	0.00248899	0.00684424	0.00226276	0.556454
UBE2Q1	0	1.82313e-21	2.59337e-107	4.50004e-13	0.0263933	0.274789	0.809319	0.00282453	0.00252511	-0.0050097	0.00165864	0.556463
TLR4	0	1.60888e-21	2.18136e-107	4.57869e-13	0.0263907	0.274496	0.807632	0.00337829	0.00254901	-0.00207942	0.000689117	0.556463
ZMYM5	0	1.62739e-21	2.90063e-107	4.41531e-13	0.0267067	0.275141	0.806289	0.0028447	0.00258545	-0.0020303	0.000673801	0.557856
CASC10	0	1.88087e-21	2.72327e-107	4.34733e-13	0.026727	0.274372	0.798473	0.00285147	0.00267648	-0.00717173	0.00238843	0.56517
LEUTX	0	1.70053e-21	2.45646e-107	4.61852e-13	0.026371	0.273275	0.794481	0.00288921	0.00270246	0.0190684	0.00635665	0.56517
ABCC1	0	1.71053e-21	3.0151e-107	3.99181e-13	0.0260497	0.271944	0.813947	0.00319574	0.00271072	-0.00130271	0.000434408	0.56517
RIMS4	0	1.6655e-21	2.13287e-107	4.54213e-13	0.0259962	0.274392	0.809229	0.00318295	0.00277295	0.00643163	0.00214968	0.57036
MPZL1	0	1.86461e-21	2.39077e-107	4.22342e-13	0.026898	0.28167	0.811543	0.00301654	0.00288405	-0.0045818	0.00153758	0.57036
MMGT1	0	1.01456e-21	2.69278e-107	4.66839e-13	0.0268002	0.273674	0.815017	0.00325282	0.00290124	0.0172	0.00577556	0.57036
FUT1	0	1.56271e-21	2.07645e-107	4.74114e-13	0.0259927	0.275371	0.807494	0.00311821	0.00291054	-0.00363744	0.00122181	0.57036
CXCL10	0	1.81334e-21	2.61993e-107	4.58336e-13	0.0260715	0.275752	0.807797	0.00289215	0.00291319	-0.00191911	0.000644688	0.57036
IFNA17	0	1.68096e-21	3.49771e-107	4.81909e-13	0.0274413	0.27069	0.816658	0.00285452	0.00292033	0.0090202	0.00303093	0.57036
FPGS	0	1.59816e-21	3.22711e-107	3.94604e-13	0.0259014	0.271314	0.797818	0.00254511	0.00300185	0.00164168	0.000553202	0.57036
ZBTB5	0	1.69731e-21	3.04594e-107	3.99121e-13	0.0263139	0.274043	0.813774	0.00295487	0.00300959	0.00267019	0.000900021	0.57036
SPINK2	0	1.75411e-21	2.52652e-107	4.33934e-13	0.0258368	0.273569	0.805517	0.00307326	0.0030482	0.0120296	0.00406011	0.57036
DBNL	0	1.76144e-21	2.94911e-107	4.43226e-13	0.0268481	0.273957	0.791787	0.00296079	0.00305366	0.0023318	0.000787149	0.57036
NRN1L	0	1.62648e-21	3.11517e-107	4.80761e-13	0.0261878	0.276401	0.818907	0.0030409	0.00309379	0.00564938	0.00190966	0.57036
CLN5	0	1.4803e-21	2.79804e-107	4.34994e-13	0.0267767	0.274619	0.801005	0.00316412	0.00315085	-0.0029364	0.000994488	0.57036
ELP6	0	1.58026e-21	3.69528e-107	4.40762e-13	0.0258889	0.277186	0.809581	0.00320292	0.00317188	0.00237742	0.000805735	0.57036
GPR160	0	1.52923e-21	2.53777e-107	4.57038e-13	0.0276968	0.276569	0.809381	0.00291631	0.0032026	-0.00485821	0.00164817	0.57036
PIH1D3	0	1.30496e-21	2.84731e-107	4.39392e-13	0.0261401	0.272738	0.816733	0.00278564	0.00333832	0.016181	0.00551353	0.57036
FRS3	0	1.80545e-21	2.91772e-107	4.36944e-13	0.026769	0.279184	0.814975	0.0031197	0.00333901	0.00281088	0.000957803	0.57036
FBXO44	0	2.01139e-21	3.34251e-107	4.28229e-13	0.026429	0.27256	0.808703	0.00313775	0.00343228	-0.00224421	0.000766946	0.57036
GSKIP	0	1.95075e-21	2.57427e-107	3.97096e-13	0.0266381	0.270632	0.79405	0.00312697	0.00344188	0.00718431	0.00245593	0.57036
SDCBP	0	1.96785e-21	2.52789e-107	4.62033e-13	0.0267826	0.271864	0.802263	0.00295056	0.00344777	-0.00438066	0.00149779	0.57036
HOXA2	0	1.84181e-21	2.53142e-107	4.64462e-13	0.0259257	0.275836	0.801227	0.00286425	0.00346765	-0.00567379	0.0019411	0.57036
SLC35B2	0	2.0132e-21	2.48676e-107	4.71594e-13	0.0259764	0.271009	0.806548	0.00304516	0.00348786	0.00284644	0.00097442	0.57036
DNAJC13	0	1.62084e-21	2.93586e-107	4.19042e-13	0.0264259	0.277068	0.81486	0.00250562	0.00357759	0.000927841	0.000318492	0.57036
CTNND2	0	1.51183e-21	2.17846e-107	4.18369e-13	0.0269891	0.270074	0.808461	0.00275873	0.00361489	-0.00193351	0.000664437	0.57036
PLPP2	0	1.38169e-21	3.3718e-107	4.2491e-13	0.0254951	0.265219	0.796373	0.00288716	0.00362536	0.00118577	0.000407609	0.57036
SH3BP5	0	1.63962e-21	3.25327e-107	4.65083e-13	0.0267528	0.271791	0.813787	0.00270052	0.00364027	0.00193105	0.000664092	0.57036
FCGR2B	0	1.41195e-21	2.41147e-107	4.10748e-13	0.0261342	0.278022	0.815751	0.00305421	0.00364093	0.00879442	0.00302447	0.57036
P4HA1	0	1.67363e-21	2.23936e-107	4.73059e-13	0.0271169	0.273141	0.808349	0.00346549	0.00366251	-0.00296562	0.00102055	0.57036
RASA3	0	1.79665e-21	2.33719e-107	4.80993e-13	0.0266289	0.271056	0.804086	0.00280765	0.0036678	-0.00197141	0.000678522	0.57036
ALDH8A1	0	1.59139e-21	2.66977e-107	4.91498e-13	0.0261013	0.270127	0.803716	0.00292625	0.00369956	0.0024836	0.000855604	0.57036
FABP6	0	1.8478e-21	3.13688e-107	4.21829e-13	0.0258087	0.277706	0.802609	0.00290348	0.00372942	-0.00298827	0.00103035	0.57036
ARHGAP9	0	1.85434e-21	3.36529e-107	4.52051e-13	0.0269672	0.266515	0.813121	0.00284822	0.00375798	-0.00118878	0.00041023	0.57036
ARSH	0	1.20571e-20	2.36895e-107	4.55958e-13	0.0264025	0.275763	0.815271	0.00320338	0.00379175	-0.0018575	0.000641615	0.57036
XBP1	0	1.54957e-21	2.64291e-107	5.06414e-13	0.0262739	0.271204	0.811262	0.003183	0.00380468	-0.00290602	0.00100416	0.57036
RBM22	0	1.88865e-21	2.7602e-107	4.3109e-13	0.0273761	0.274802	0.809108	0.00292733	0.00381494	0.00762291	0.00263484	0.57036
HLA-DQB1	0	1.95349e-21	2.26385e-107	4.63004e-13	0.0260942	0.269619	0.805652	0.00299266	0.00381998	-0.00611872	0.00211523	0.57036
PRR13	0	1.55415e-21	1.91715e-107	4.2077e-13	0.0271888	0.272529	0.809984	0.00293177	0.00389589	0.00771552	0.00267295	0.57036
STOM	0	1.60224e-21	4.0615e-107	4.33478e-13	0.0266335	0.268145	0.812185	0.00293295	0.00389993	0.00372211	0.00128963	0.57036
COQ8B	0	1.75769e-21	3.96922e-107	4.34671e-13	0.0270968	0.271086	0.801418	0.00300158	0.00393235	0.00142053	0.000492626	0.57036
ALDH1B1	0	1.68079e-21	2.84504e-107	3.97182e-13	0.0263422	0.27599	0.800953	0.00308035	0.00393436	-0.00114579	0.000397372	0.57036
JAML	0	1.87169e-21	2.7015e-107	4.89432e-13	0.0265024	0.268156	0.818737	0.00317218	0.00398355	0.00203717	0.000707471	0.570689
PLCXD2	0	2.03733e-21	3.65547e-107	4.26615e-13	0.0256412	0.274667	0.807939	0.00340865	0.00403809	0.00266109	0.000925527	0.570689
WDR49	0	1.82875e-21	2.87108e-107	4.62512e-13	0.0260272	0.274301	0.817229	0.00280935	0.00405877	0.00201126	0.00069991	0.570689
AEBP2	0	1.89539e-21	4.05751e-107	4.38764e-13	0.0269366	0.275757	0.799958	0.00271694	0.00405965	0.00562424	0.00195726	0.570689
FAM109B	0	1.76457e-21	3.09427e-107	4.30161e-13	0.0261326	0.269672	0.806712	0.00280543	0.00410012	-0.00268198	0.000934358	0.572043
PROK1	0	1.54316e-21	2.09385e-107	4.82515e-13	0.0262391	0.267892	0.797398	0.00281772	0.00419769	0.00665723	0.0023253	0.581287
STAM2	0	1.66264e-21	1.97096e-107	4.43209e-13	0.0263049	0.272425	0.804777	0.00299463	0.00423428	0.00335312	0.00117234	0.58201
PLCH2	0	1.65499e-21	2.49507e-107	4.89494e-13	0.026124	0.272589	0.808776	0.0030798	0.00434062	-0.00186846	0.000655064	0.584965
DHX29	0	1.70614e-21	3.75258e-107	4.62645e-13	0.0258896	0.27654	0.819066	0.00291954	0.0043674	-0.00168852	0.000592384	0.584965
PPP1R18	0	1.80068e-21	2.2239e-107	4.32928e-13	0.0263455	0.270215	0.808417	0.00330408	0.00437038	0.00144966	0.000508624	0.584965
PSME2	0	1.58029e-21	2.8611e-107	4.74684e-13	0.0261718	0.268767	0.815026	0.00297141	0.00440568	0.00506445	0.0017785	0.584965
C1orf194	0	1.78304e-21	2.38793e-107	4.53487e-13	0.0253328	0.278396	0.811715	0.00318812	0.00441341	0.00364829	0.00128143	0.584965
LCE6A	0	1.84642e-21	2.45784e-107	4.18327e-13	0.0259206	0.270942	0.797173	0.00308076	0.00447844	0.00624805	0.00219818	0.586024
TNFAIP2	0	1.60724e-21	2.58106e-107	4.43374e-13	0.0272364	0.267256	0.7973	0.00281434	0.00458113	-0.00301136	0.00106215	0.586024
TAF15	0	1.6315e-21	3.22006e-107	4.22124e-13	0.0267883	0.273635	0.80918	0.00296545	0.00462092	0.00244278	0.000862447	0.586024
RTKN	0	1.97026e-21	2.43548e-107	4.33477e-13	0.0266407	0.273916	0.808737	0.00279258	0.00464561	-0.00178105	0.000629197	0.586024
ROBO1	0	1.70519e-21	3.64863e-107	5.05751e-13	0.0266085	0.268197	0.810266	0.00295576	0.00467111	0.00153421	0.00054233	0.586024
NUMA1	0	1.82468e-21	2.98397e-107	4.39559e-13	0.0269176	0.274478	0.807844	0.00295135	0.00467461	-0.00097195	0.000343605	0.586024
SLC7A8	0	1.61747e-21	3.81397e-107	4.91415e-13	0.026806	0.275246	0.809673	0.00323402	0.00469366	0.00140786	0.000497938	0.586024
LHFPL2	0	1.97574e-21	3.38107e-107	4.37268e-13	0.0263617	0.274931	0.815944	0.00294987	0.00470807	-0.00243312	0.000860856	0.586024
OR4S2	0	1.64306e-21	3.01511e-107	4.7842e-13	0.0251656	0.27625	0.813391	0.00294335	0.00472593	0.00568433	0.00201202	0.586024
TRAPPC2	0	1.21944e-21	2.53934e-107	4.81371e-13	0.0261603	0.275736	0.808403	0.00281905	0.00478233	0.0208287	0.00738246	0.586024
CBX2	0	1.88612e-21	3.14145e-107	4.28488e-13	0.0259688	0.27393	0.805742	0.00318934	0.00478432	0.00305638	0.00108334	0.586024
SLC23A3	0	1.72105e-21	3.26219e-107	4.51172e-13	0.0261238	0.279261	0.801801	0.00306867	0.00485724	0.00541177	0.00192152	0.586024
S100A6	0	1.76287e-21	3.47059e-107	4.39376e-13	0.0259147	0.272223	0.820864	0.00294006	0.00486888	-0.00601885	0.00213766	0.586024
MFAP1	0	1.72456e-21	2.48297e-107	4.21753e-13	0.0270616	0.2785	0.804564	0.00267511	0.00488827	-0.00396649	0.00140938	0.586024
MINPP1	0	1.77674e-21	2.93326e-107	4.2013e-13	0.0263912	0.27249	0.807076	0.00315475	0.00490504	0.0039733	0.00141235	0.586024
TMEM229A	0	1.67153e-21	1.94343e-107	4.59172e-13	0.0270852	0.282177	0.807072	0.00296902	0.00492669	0.0037617	0.00133781	0.586024
PFDN6	0	1.70237e-21	3.11336e-107	4.76771e-13	0.0258657	0.274232	0.806163	0.002447	0.00497834	0.00222267	0.000791415	0.588395
CEP295	0	1.87678e-21	2.45963e-107	4.88776e-13	0.0252463	0.277456	0.807199	0.00307789	0.00518525	-0.00183816	0.000657581	0.608971
DEGS1	0	1.67058e-21	2.75276e-107	4.33875e-13	0.02616	0.271426	0.798445	0.0029184	0.00531508	-0.00384146	0.00137818	0.620293
SORCS2	0	1.50336e-21	2.72788e-107	4.35284e-13	0.0266864	0.276275	0.800256	0.00307257	0.00535318	-0.00172873	0.000620726	0.620836
CT47B1	0	9.62994e-22	3.50812e-107	4.21039e-13	0.026928	0.275725	0.807175	0.00307245	0.00558412	0.00574584	0.00207334	0.631538
PCDH10	0	1.50979e-21	2.59606e-107	4.40272e-13	0.0267259	0.270919	0.808159	0.00274572	0.00560999	-0.00323055	0.00116635	0.631538
HIST1H2AI	0	1.57103e-21	2.50891e-107	3.95811e-13	0.0279729	0.275108	0.803992	0.00291043	0.00561472	0.00777038	0.00280568	0.631538
ZMAT3	0	1.90063e-21	2.39673e-107	4.43812e-13	0.0262622	0.271535	0.811349	0.00292916	0.00561865	-0.00467875	0.00168951	0.631538
UQCC2	0	1.87478e-21	3.42573e-107	4.78402e-13	0.0263883	0.270048	0.796903	0.00292146	0.0056238	0.00888098	0.0032073	0.631538
DDIT4	0	1.76245e-21	2.93348e-107	4.37179e-13	0.0269373	0.276662	0.809131	0.00293454	0.00566955	0.00579504	0.00209483	0.631538
NBEAL2	0	1.86813e-21	2.87341e-107	4.71965e-13	0.0259525	0.279544	0.807091	0.00273325	0.00568371	0.00103033	0.00037256	0.631538
BANP	0	1.71328e-21	2.32458e-107	4.31584e-13	0.0259982	0.27322	0.813579	0.00289056	0.00577759	-0.00380685	0.0013792	0.638149
XRRA1	0	1.53106e-21	2.44459e-107	4.25316e-13	0.0260951	0.27352	0.795896	0.00316511	0.00583788	0.00219769	0.00079719	0.640992
ELL2	0	1.42555e-21	2.39224e-107	4.96171e-13	0.0265261	0.27213	0.80328	0.00274288	0.00592711	0.00283123	0.00102886	0.642238
CCBE1	0	1.64008e-21	3.04626e-107	4.86214e-13	0.0256621	0.273412	0.799707	0.00291987	0.00596953	-0.00147083	0.000534948	0.642238
ZNF286A	0	1.95664e-21	3.12985e-107	4.61445e-13	0.0268432	0.276132	0.819576	0.00299192	0.00600427	-0.00367376	0.00133709	0.642238
MAP4K5	0	1.85386e-21	3.52934e-107	4.06095e-13	0.0262191	0.273338	0.809214	0.00324144	0.00601838	0.00159378	0.000580226	0.642238
TINF2	0	1.78011e-21	2.35084e-107	4.29038e-13	0.0259635	0.273124	0.809387	0.00280694	0.00605595	-0.00534307	0.00194663	0.642238
MAP2K2	0	1.69947e-21	2.17754e-107	4.65645e-13	0.0269025	0.275723	0.815582	0.00294766	0.00606528	-0.00352369	0.00128401	0.642238
TMEM140	0	1.78602e-21	2.51848e-107	4.48891e-13	0.0268819	0.27536	0.816508	0.00282236	0.00612512	0.00354922	0.00129484	0.642238
PIANP	0	1.67707e-21	2.56248e-107	4.76359e-13	0.0267218	0.277765	0.801523	0.00296584	0.00618359	-0.00386481	0.00141159	0.642238
TMEM151B	0	1.74634e-21	2.87775e-107	4.14997e-13	0.0262409	0.272432	0.812599	0.0030139	0.00619396	-0.00325752	0.00119002	0.642238
AWAT1	0	4.03403e-21	3.23935e-107	4.74434e-13	0.0266029	0.269688	0.786509	0.0027539	0.00621137	-0.00270824	0.000989692	0.642238
PRR5-ARHGAP8	0	1.82879e-21	3.06633e-107	4.57479e-13	0.0266354	0.274666	0.807976	0.00313311	0.00624631	-0.00698684	0.00255498	0.642238
ADAMTSL1	0	1.85501e-21	2.72958e-107	4.5014e-13	0.0266615	0.277668	0.807213	0.00294359	0.00630528	0.00101527	0.000371688	0.642238
KCNE1	0	1.76566e-21	2.71746e-107	4.06457e-13	0.0266988	0.269114	0.808189	0.00300463	0.00637754	-0.00470349	0.00172431	0.642238
TEKT1	0	1.62917e-21	3.05015e-107	4.70032e-13	0.0263926	0.280417	0.810064	0.00287569	0.00642364	0.00227382	0.000834316	0.642238
OR7A17	0	1.6716e-21	2.39405e-107	4.36149e-13	0.0260207	0.27456	0.809327	0.00286503	0.00647484	0.00669296	0.00245816	0.642238
RTL8B	0	9.50264e-22	2.97855e-107	4.32389e-13	0.0266995	0.273605	0.804256	0.00299398	0.0064873	0.00920793	0.00338264	0.642238
FXYD1	0	1.72679e-21	3.2164e-107	4.73328e-13	0.0270049	0.271605	0.807027	0.00254874	0.00649491	0.00142957	0.000525244	0.642238
HPGD	0	1.74466e-21	2.48648e-107	4.52721e-13	0.0270567	0.280665	0.814945	0.00294959	0.00650189	0.0027968	0.00102772	0.642238
NRXN2	0	1.68728e-21	2.9925e-107	5.11432e-13	0.0259162	0.269979	0.802549	0.00295716	0.00650683	0.00165283	0.000607407	0.642238
CYB5B	0	1.74474e-21	3.03445e-107	4.49657e-13	0.0260521	0.273779	0.802841	0.00295909	0.0066045	0.0028063	0.00103317	0.642287
C2orf74	0	1.85623e-21	2.66774e-107	4.69741e-13	0.0265726	0.276988	0.804953	0.00276982	0.00663235	0.00495516	0.00182524	0.642287
MRGPRX4	0	1.76339e-21	2.50776e-107	4.4972e-13	0.0256092	0.278553	0.812076	0.00295768	0.00664251	-0.00162502	0.000598689	0.642287
DNAJB14	0	1.8277e-21	3.48707e-107	4.32148e-13	0.026367	0.278556	0.800383	0.00296712	0.006869	0.00410475	0.0015185	0.642287
SNRPB2	0	1.71948e-21	2.57438e-107	4.56409e-13	0.0263156	0.275964	0.809925	0.00303323	0.00687234	-0.00636936	0.0023564	0.642287
ZNF30	0	1.62428e-21	3.43504e-107	4.70091e-13	0.0253898	0.272311	0.809013	0.00292293	0.00691132	-0.00213311	0.00078971	0.642287
PCBP2	0	1.9319e-21	3.03531e-107	4.18337e-13	0.0260447	0.270214	0.801704	0.00288215	0.0069516	0.0140358	0.00520001	0.642287
NOB1	0	1.87172e-21	2.92567e-107	4.3119e-13	0.0255245	0.273147	0.813823	0.00275947	0.00696954	-0.00100552	0.000372644	0.642287
TM7SF3	0	1.76709e-21	2.61502e-107	4.44323e-13	0.0263156	0.272568	0.814673	0.00295175	0.00700581	-0.00248718	0.000922337	0.642287
ACOT7	0	1.52223e-21	3.02898e-107	4.21566e-13	0.0267821	0.274948	0.802852	0.00309499	0.00702749	0.00396822	0.00147212	0.642287
MTUS1	0	1.5815e-21	2.98789e-107	4.53513e-13	0.0259022	0.266835	0.815868	0.00268795	0.00705566	-0.00107028	0.000397249	0.642287
GGTLC2	0	1.67727e-21	2.69025e-107	4.4712e-13	0.0268511	0.271672	0.807621	0.00280459	0.00706407	-0.00312897	0.00116153	0.642287
ANKRD13A	0	1.63701e-21	3.61864e-107	4.87316e-13	0.0262398	0.271196	0.80148	0.00291542	0.00706479	-0.00212309	0.000788135	0.642287
PTGR2	0	1.62481e-21	3.40588e-107	4.43229e-13	0.026453	0.274737	0.804108	0.00309758	0.00707588	0.00235236	0.000873416	0.642287
PTPN1	0	1.64959e-21	2.44401e-107	4.78289e-13	0.0265283	0.278823	0.813258	0.00296509	0.00721662	-0.00436414	0.00162434	0.642287
BNIP1	0	1.68434e-21	2.47242e-107	4.23349e-13	0.0267272	0.275048	0.809155	0.00286832	0.00722988	-0.00282518	0.00105178	0.642287
MELK	0	1.60902e-21	2.24784e-107	5.3389e-13	0.0258727	0.278486	0.809315	0.00295028	0.00723457	-0.00144611	0.000538411	0.642287
CCR7	0	1.82207e-21	2.36947e-107	4.71734e-13	0.026014	0.277164	0.809306	0.00287348	0.00729298	0.00361742	0.00134818	0.642287
ALB	0	1.73084e-21	2.47793e-107	4.41869e-13	0.0259522	0.273804	0.796523	0.00286585	0.00731274	-0.00304833	0.00113647	0.642287
F12	0	1.7538e-21	3.32764e-107	4.77325e-13	0.0264048	0.277766	0.814064	0.00307094	0.00734148	-0.00298795	0.0011145	0.642287
RBP7	0	1.66986e-21	2.42129e-107	4.23344e-13	0.0258024	0.277997	0.800828	0.00278323	0.00740779	-0.0024071	0.000898851	0.642287
EIF1AX	0	1.91147e-21	3.26367e-107	4.53454e-13	0.0266652	0.272564	0.802207	0.00292668	0.00741805	-0.0521581	0.0194801	0.642287
HIST1H4L	0	1.74366e-21	2.48595e-107	4.286e-13	0.0261811	0.278526	0.811207	0.00340234	0.00745755	0.00220973	0.000825843	0.642287
CD48	0	1.69669e-21	2.59498e-107	4.97429e-13	0.0251855	0.270511	0.814579	0.00314462	0.00746632	-0.00323576	0.00120948	0.642287
BPIFB6	0	1.92499e-21	2.61709e-107	4.42555e-13	0.0265674	0.277821	0.807236	0.00261124	0.00747522	-0.00201704	0.00075405	0.642287
GPR141	0	1.76033e-21	2.87998e-107	4.43004e-13	0.0263524	0.27658	0.805844	0.00285151	0.00748038	-0.00390016	0.00145817	0.642287
RPL32	0	1.43389e-21	2.63487e-107	4.47121e-13	0.0273145	0.273216	0.814409	0.0030875	0.0074836	0.00538812	0.00201458	0.642287
VSTM5	0	1.94374e-21	4.02716e-107	4.51473e-13	0.0264513	0.286833	0.795106	0.00291404	0.00751009	0.00288429	0.00107889	0.642287
FBXO10	0	1.41758e-21	2.836e-107	5.07334e-13	0.0262153	0.270613	0.821334	0.00279012	0.00751111	0.00193296	0.000723056	0.642287
AP3S2	0	1.85474e-21	2.26725e-107	4.52091e-13	0.0267781	0.27087	0.80652	0.00297304	0.00761485	0.00971975	0.0036421	0.645132
C7orf31	0	1.62717e-21	2.60677e-107	5.15437e-13	0.0254794	0.277748	0.804981	0.00331064	0.00761852	-0.00226191	0.000847614	0.645132
SESN1	0	1.61609e-21	2.5116e-107	4.81312e-13	0.0260728	0.273418	0.808487	0.00309269	0.00765263	0.00243672	0.000913634	0.645132
ALDH7A1	0	1.8012e-21	3.08745e-107	4.30288e-13	0.0267654	0.277194	0.818056	0.0027665	0.00775657	-0.00144685	0.000543413	0.645132
METTL2B	0	1.59388e-21	2.18766e-107	4.98666e-13	0.0268143	0.272468	0.805227	0.00292616	0.0077917	0.00359073	0.00134939	0.645132
PTPN7	0	1.42611e-21	4.12563e-107	4.6177e-13	0.0257723	0.272889	0.792838	0.00265656	0.00783749	-0.00113301	0.000426098	0.645132
RRNAD1	0	1.67674e-21	2.37964e-107	4.60161e-13	0.0260379	0.275209	0.811175	0.00287287	0.00790276	-0.00197525	0.000743627	0.645132
ASXL1	0	1.64164e-21	2.2008e-107	4.11002e-13	0.0260679	0.277299	0.796721	0.00277234	0.00796111	0.00174428	0.000657288	0.645132
NTF4	0	1.70822e-21	3.38338e-107	4.38798e-13	0.0264005	0.270562	0.807727	0.00290315	0.00796642	-0.00303902	0.00114527	0.645132
DHDH	0	1.74445e-21	2.29215e-107	4.3169e-13	0.0272892	0.274862	0.816619	0.00304853	0.00797344	0.00146734	0.000553039	0.645132
CKLF	0	1.66254e-21	2.73187e-107	4.69339e-13	0.0262108	0.269923	0.8021	0.00303672	0.00798553	-0.0144653	0.00545302	0.645132
SNX9	0	1.66613e-21	2.81726e-107	4.49479e-13	0.0261073	0.270159	0.808895	0.00293152	0.00806028	0.00141914	0.000535613	0.645132
NSG1	0	1.64459e-21	3.29207e-107	4.02116e-13	0.0267016	0.267206	0.805815	0.00329625	0.00812214	0.00195054	0.00073689	0.645132
RPP40	0	1.9793e-21	2.03027e-107	4.37133e-13	0.0273332	0.268064	0.806209	0.00289444	0.00813631	-0.00274527	0.00103736	0.645132
OSGEP	0	1.56204e-21	2.83533e-107	4.43249e-13	0.0274608	0.276369	0.801469	0.00295542	0.00817872	0.00238127	0.000900416	0.645132
COPS4	0	1.74658e-21	2.98707e-107	4.71282e-13	0.0254213	0.27836	0.817525	0.00307534	0.00826569	-0.00757476	0.00286808	0.645132
ICE2	0	1.56219e-21	2.58175e-107	4.54704e-13	0.0267489	0.273566	0.812303	0.00309609	0.00831446	0.00222706	0.000843883	0.645132
MBOAT1	0	1.76538e-21	2.68736e-107	4.0333e-13	0.0259107	0.275244	0.811434	0.00296396	0.00831879	0.00216821	0.00082164	0.645132
CACNA1I	0	1.68304e-21	3.15293e-107	3.92463e-13	0.026747	0.278366	0.801924	0.00280566	0.00832651	-0.00109696	0.00041574	0.645132
CNNM2	0	1.50048e-21	4.25355e-107	4.67826e-13	0.0264443	0.27308	0.805157	0.0029552	0.00836318	0.00436099	0.00165372	0.645132
ASXL3	0	1.59372e-21	3.46023e-107	4.4707e-13	0.026551	0.270726	0.811509	0.0029053	0.0083669	0.00133594	0.000506627	0.645132
C12orf49	0	1.79242e-21	3.56486e-107	4.30346e-13	0.0261251	0.275524	0.803772	0.00288981	0.00839808	0.00362905	0.0013769	0.645132
SERPINA1	0	1.56352e-21	2.55125e-107	4.51597e-13	0.0270764	0.27575	0.811148	0.00326979	0.00839808	0.00149254	0.000566285	0.645132
CDH20	0	1.56608e-21	2.53931e-107	4.83068e-13	0.0263365	0.278021	0.801771	0.00298849	0.0084006	0.00226366	0.000858888	0.645132
SLC44A3	0	1.80912e-21	3.43744e-107	4.84834e-13	0.0256545	0.270966	0.804203	0.00290523	0.00849983	-0.00192682	0.000732191	0.645132
C12orf10	0	1.64063e-21	2.54399e-107	4.44605e-13	0.0263973	0.272582	0.813173	0.00299094	0.00850856	0.00130302	0.000495213	0.645132
ZFAT	0	1.96077e-21	3.12237e-107	4.15017e-13	0.0259911	0.271365	0.82093	0.00310681	0.00851861	-0.00131717	0.000500668	0.645132
UFL1	0	1.71431e-21	2.28547e-107	4.77667e-13	0.026564	0.275218	0.79622	0.00282081	0.00854309	-0.00186223	0.00070811	0.645132
CD300LB	0	1.52632e-21	2.04079e-107	4.71063e-13	0.0262277	0.272977	0.802269	0.00306229	0.00863206	0.00435388	0.00165778	0.645132
ZDHHC6	0	1.80924e-21	2.77502e-107	4.90815e-13	0.0265525	0.27633	0.800506	0.00278726	0.00866803	0.00190445	0.000725529	0.645132
NEDD9	0	1.67241e-21	2.03638e-107	4.58949e-13	0.0256871	0.272351	0.80917	0.00308813	0.00867426	-0.00167285	0.000637357	0.645132
N4BP2	0	1.86225e-21	3.12297e-107	4.2859e-13	0.0261544	0.28133	0.823243	0.0029303	0.0086903	-0.00223412	0.000851407	0.645132
AQP2	0	1.56114e-21	2.57508e-107	4.37069e-13	0.0273272	0.272402	0.805253	0.00307376	0.00871246	-0.00293281	0.00111804	0.645132
CNTN5	0	1.8397e-21	2.61482e-107	4.71729e-13	0.0266377	0.268914	0.802856	0.00302653	0.00872645	-0.00136422	0.000520175	0.645132
MFAP3	0	1.83325e-21	2.26881e-107	4.67828e-13	0.0267798	0.273265	0.806558	0.00327781	0.00887674	-0.00315558	0.00120589	0.653638
OR7A10	0	2.03776e-21	2.45428e-107	4.76948e-13	0.0266293	0.275771	0.808598	0.00298451	0.00898303	0.00432466	0.00165522	0.65862
MVP	0	1.58423e-21	2.44468e-107	4.26456e-13	0.0260807	0.273547	0.809137	0.00305612	0.00901538	-0.00131976	0.000505363	0.65862
BAZ2B	0	1.66959e-21	2.43444e-107	4.87736e-13	0.0261906	0.274153	0.8169	0.0028814	0.00909035	-0.000972415	0.000372763	0.658949
NT5M	0	1.724e-21	2.38529e-107	4.27017e-13	0.026314	0.276323	0.809748	0.00325995	0.00910862	0.00265504	0.00101804	0.658949
CLSTN2	0	1.77917e-21	2.38724e-107	4.69513e-13	0.0263761	0.276864	0.801275	0.00290507	0.00913833	-0.00116721	0.000447743	0.658949
RBM47	0	1.67061e-21	2.97429e-107	4.54731e-13	0.0250333	0.275785	0.805304	0.00340446	0.00919061	0.00134704	0.000517115	0.658949
KCNIP1	0	1.6024e-21	2.3941e-107	4.3468e-13	0.0254194	0.271717	0.810482	0.00297242	0.00925527	-0.00485773	0.00186655	0.658949
DYRK1A	0	1.56962e-21	2.36075e-107	4.28778e-13	0.0263735	0.275875	0.809447	0.00289527	0.00925814	0.0030375	0.00116719	0.658949
KCNJ1	0	1.63894e-21	2.26618e-107	4.48612e-13	0.0261636	0.27234	0.810972	0.0031703	0.00926847	0.00278849	0.00107166	0.658949
POLR2J2	0	1.71724e-21	3.47365e-107	4.65104e-13	0.0264029	0.276685	0.811583	0.00302562	0.00938482	0.00857868	0.00330236	0.661721
C6orf10	0	1.66747e-21	2.33285e-107	4.43039e-13	0.0270793	0.274692	0.808474	0.00315361	0.00941221	0.00229785	0.000884896	0.661721
TSC2	0	1.71084e-21	3.30457e-107	4.65081e-13	0.0270901	0.285049	0.81143	0.0032371	0.00941444	-0.000916585	0.000352986	0.661721
TK2	0	1.81618e-21	2.665e-107	4.32604e-13	0.0260439	0.277418	0.805067	0.00311553	0.00945307	0.00227221	0.000875526	0.661929
SCML1	0	1.96411e-21	2.64469e-107	4.77233e-13	0.0269011	0.271838	0.80809	0.00287303	0.00959294	-0.0305053	0.0117772	0.668468
PRR30	0	1.65543e-21	2.74181e-107	4.28272e-13	0.0270528	0.279341	0.812673	0.00296567	0.00966396	-0.00161786	0.000625223	0.668468
IL1A	0	1.78872e-21	2.78763e-107	4.79338e-13	0.026574	0.270268	0.801762	0.00297581	0.00969543	0.00253566	0.000980327	0.668468
ZNF175	0	1.85312e-21	2.61141e-107	4.49326e-13	0.0257589	0.275229	0.801478	0.00285288	0.00969573	-0.00347028	0.00134168	0.668468
HACL1	0	1.8169e-21	3.163e-107	4.99197e-13	0.0265083	0.275291	0.806154	0.00276672	0.00975041	-0.00171496	0.000663534	0.668468
PCNX3	0	1.82566e-21	3.09349e-107	4.26496e-13	0.0268639	0.281485	0.806696	0.00277156	0.0097626	-0.000783531	0.000303205	0.668468
KIAA1644	0	1.66907e-21	2.076e-107	4.76868e-13	0.0270961	0.273644	0.802264	0.00301327	0.00988381	0.00347289	0.00134613	0.674279
SLC19A1	0	1.69333e-21	2.89838e-107	4.33708e-13	0.0259398	0.271448	0.803148	0.00297292	0.010097	0.00238409	0.000926751	0.681265
LY6G6D	0	1.86351e-21	3.047e-107	4.25068e-13	0.0262877	0.275789	0.818724	0.00297273	0.0101118	0.00625468	0.00243182	0.681265
PSPH	0	1.49553e-21	2.40641e-107	4.73663e-13	0.0265752	0.276049	0.805597	0.00310268	0.0101221	0.00275588	0.00107163	0.681265
RPS7	0	1.68117e-21	2.61957e-107	4.54656e-13	0.026249	0.271539	0.801184	0.00293245	0.0101366	0.0110831	0.00431053	0.681265
FEZF1	0	1.4704e-21	2.82883e-107	4.59928e-13	0.026891	0.27372	0.82172	0.00337641	0.0101698	-0.00397927	0.00154833	0.681265
ZNF565	0	1.66145e-21	2.72841e-107	4.7561e-13	0.0262281	0.276282	0.808249	0.00293751	0.0104117	0.00441612	0.00172378	0.687293
SLC45A2	0	1.70777e-21	3.06875e-107	4.29785e-13	0.0266121	0.273339	0.7968	0.00317092	0.0104336	0.00177572	0.000693328	0.687293
MRM1	0	1.92503e-21	2.65235e-107	4.52062e-13	0.0265388	0.272729	0.808998	0.00285044	0.0104993	-0.00332001	0.0012974	0.687293
SHC1	0	1.51232e-21	2.99861e-107	4.64491e-13	0.0265327	0.276699	0.812315	0.00296412	0.0105898	-0.00222376	0.00087002	0.687293
LMCD1	0	1.65262e-21	4.27039e-107	4.37757e-13	0.0258211	0.274816	0.812893	0.00295464	0.0105968	0.00183277	0.000717114	0.687293
PAK1IP1	0	1.88476e-21	2.84132e-107	4.12678e-13	0.0267381	0.27135	0.803023	0.00295816	0.0106092	-0.0040125	0.00157023	0.687293
DNAH12	0	1.64419e-21	2.43913e-107	4.6249e-13	0.0261552	0.272098	0.79649	0.00276199	0.0106287	-0.000591188	0.000231411	0.687293
NDNF	0	1.87356e-21	2.6325e-107	4.70255e-13	0.0263339	0.273665	0.811421	0.00305844	0.0106302	-0.00239458	0.000937337	0.687293
BRCA1	0	1.73105e-21	2.61589e-107	4.15595e-13	0.0264341	0.276202	0.807636	0.00310417	0.0106469	-0.00160325	0.000627715	0.687293
CACYBP	0	1.83149e-21	2.53201e-107	4.31027e-13	0.0258168	0.268779	0.806198	0.00336885	0.0106778	-0.00382557	0.0014984	0.687293
PPM1B	0	1.60932e-21	2.46871e-107	4.20741e-13	0.0263932	0.27693	0.805997	0.0030243	0.0107102	0.00296591	0.00116217	0.687293
HSPA2	0	1.82497e-21	2.53495e-107	4.67438e-13	0.0266092	0.274778	0.804667	0.0027291	0.0107332	0.00374976	0.00146975	0.687293
LDHAL6A	0	1.80985e-21	2.77655e-107	4.71008e-13	0.0270271	0.272746	0.799204	0.00308406	0.0107413	0.00231333	0.000906819	0.687293
SNX29	0	1.67834e-21	2.57895e-107	4.48586e-13	0.0270121	0.272281	0.809184	0.0031334	0.0108381	0.00157986	0.00062006	0.688155
CD163	0	1.70075e-21	2.36698e-107	4.36518e-13	0.026985	0.271253	0.807304	0.00294156	0.0108628	0.00250725	0.000984349	0.688155
GRIK5	0	1.65701e-21	2.78851e-107	4.13214e-13	0.026774	0.272283	0.817867	0.0032273	0.010866	0.00149938	0.000588682	0.688155
NXNL2	0	1.60659e-21	2.30705e-107	4.70286e-13	0.0260847	0.278227	0.812919	0.00286459	0.0110215	-0.00407241	0.00160202	0.692328
TRPC7	0	1.51107e-21	3.04496e-107	4.52476e-13	0.0260767	0.273908	0.801483	0.00294761	0.0110613	-0.00232031	0.000913224	0.692328
SPOCD1	0	1.65541e-21	2.84166e-107	4.60959e-13	0.0267483	0.269811	0.817911	0.00313288	0.0110852	0.00148642	0.000585197	0.692328
KRTAP10-9	0	1.61926e-21	2.07245e-107	4.6557e-13	0.0267578	0.27921	0.81137	0.00304771	0.0111122	-0.00376803	0.00148395	0.692328
LGALS13	0	1.75227e-21	2.88121e-107	4.62702e-13	0.026803	0.275217	0.810137	0.00288664	0.0111184	0.00281704	0.00110951	0.692328
UGT1A9	0	1.65845e-21	3.45452e-107	4.4052e-13	0.0251935	0.27684	0.802664	0.00259083	0.0111627	0.0040298	0.00158804	0.692761
TMEM104	0	1.63392e-21	2.81436e-107	4.72828e-13	0.0261733	0.270835	0.811701	0.00286161	0.0112372	-0.00182516	0.000719906	0.695055
OR3A2	0	1.78213e-21	2.78019e-107	4.59401e-13	0.026275	0.26836	0.805244	0.00298471	0.0113119	0.00253933	0.00100252	0.697353
MRGPRX3	0	1.7534e-21	2.26081e-107	4.73455e-13	0.0263977	0.267337	0.799472	0.00280751	0.0113787	-0.00504437	0.00199313	0.699151
RNASE3	0	1.98334e-21	2.69941e-107	4.66247e-13	0.0259102	0.270571	0.802946	0.00317469	0.0114535	0.00217891	0.000861711	0.700598
DNAJC12	0	1.82897e-21	2.514e-107	4.34405e-13	0.0261501	0.277086	0.805654	0.00298299	0.0115566	-0.00378214	0.00149762	0.700598
FER1L6	0	2.01589e-21	3.44004e-107	4.39191e-13	0.0276184	0.281112	0.802125	0.00295843	0.0115652	0.000643384	0.000254788	0.700598
GALNT12	0	1.70563e-21	2.77982e-107	4.62999e-13	0.0270264	0.277586	0.801526	0.00301074	0.0116139	0.0016549	0.000655744	0.700598
TSACC	0	1.84869e-21	3.15239e-107	4.43443e-13	0.0265619	0.275614	0.809986	0.00288849	0.011643	-0.00653765	0.00259141	0.700598
PRPF31	0	1.88002e-21	3.08829e-107	4.90612e-13	0.0263395	0.27085	0.802544	0.00301008	0.0116598	0.00338418	0.0013417	0.700598
REM2	0	1.7314e-21	2.85251e-107	4.28423e-13	0.026466	0.276249	0.813882	0.00288132	0.0116798	-0.0018006	0.00071404	0.700598
RSL1D1	0	1.58099e-21	2.3656e-107	4.77237e-13	0.0259334	0.27092	0.812258	0.0030431	0.0117043	-0.00200745	0.000796302	0.700598
EFCAB9	0	1.66504e-21	3.11741e-107	4.48683e-13	0.0258912	0.272709	0.799439	0.00285218	0.0118244	-0.00435467	0.00172984	0.703027
GALK2	0	1.59665e-21	3.12799e-107	4.2562e-13	0.0264088	0.272605	0.811551	0.00299812	0.0119124	-0.00210127	0.000835575	0.703027
ST7	0	1.76407e-21	2.23944e-107	4.31483e-13	0.0260921	0.282194	0.808431	0.00294553	0.0119179	-0.00350989	0.0013958	0.703027
C19orf68	0	1.77713e-21	3.1465e-107	4.17668e-13	0.0262373	0.276547	0.808297	0.00294691	0.0119602	0.00275608	0.00109658	0.703027
MTDH	0	1.75667e-21	2.51354e-107	4.50056e-13	0.0261617	0.27408	0.802804	0.00317692	0.0119779	-0.00190768	0.000759175	0.703027
MAPK7	0	1.58817e-21	2.77326e-107	4.30414e-13	0.0266659	0.276322	0.806598	0.00292636	0.0119981	-0.00298405	0.00118781	0.703027
REEP3	0	1.73077e-21	2.37734e-107	4.59775e-13	0.0269752	0.274422	0.80591	0.00279734	0.0120101	0.00417415	0.00166177	0.703027
CD79A	0	1.74099e-21	4.00092e-107	4.45988e-13	0.0261607	0.277066	0.800704	0.00285647	0.0122973	-0.00149138	0.000595713	0.715482
DCLK2	0	1.79504e-21	2.31545e-107	4.48929e-13	0.0263306	0.274876	0.811926	0.00313364	0.012338	0.0023205	0.000927326	0.715482
LONP1	0	1.80182e-21	3.18274e-107	4.4385e-13	0.0261799	0.276417	0.802514	0.00282793	0.0123696	0.00106318	0.000425024	0.715482
KLF6	0	1.62664e-21	3.18523e-107	4.841e-13	0.0254706	0.277575	0.805691	0.00295427	0.0123825	0.00749776	0.0029978	0.715482
BCORL1	0	1.3073e-20	3.33865e-107	4.87046e-13	0.0265968	0.272047	0.803018	0.00289522	0.0124157	-0.00247301	0.000989149	0.715482
EEF1A2	0	1.83768e-21	2.65182e-107	4.07885e-13	0.0262427	0.284346	0.815328	0.00298364	0.0124881	-0.00944486	0.00378086	0.717428
CIDEB	0	1.72674e-21	3.05293e-107	4.31477e-13	0.0264852	0.273403	0.809738	0.00284788	0.0125426	-0.00270767	0.00108458	0.71774
MUS81	0	1.82828e-21	2.30995e-107	4.66033e-13	0.025435	0.27328	0.807143	0.00297274	0.0126201	-0.00222501	0.000892024	0.71774
FAM47C	0	3.81671e-21	2.33139e-107	4.52591e-13	0.0264976	0.279786	0.796341	0.00286538	0.012635	-0.00384942	0.00154352	0.71774
NCSTN	0	1.85886e-21	2.40583e-107	4.40287e-13	0.025895	0.274958	0.801418	0.00288009	0.0127826	-0.00232828	0.000935127	0.71774
ERF	0	1.91787e-21	2.79049e-107	4.59168e-13	0.0266604	0.27686	0.816484	0.0030255	0.0127972	0.00357393	0.00143566	0.71774
NPM3	0	1.61726e-21	2.04492e-107	4.32745e-13	0.0260931	0.278336	0.809628	0.00324409	0.012855	0.00313871	0.00126165	0.71774
OR2C3	0	1.73578e-21	2.74013e-107	4.70051e-13	0.0257561	0.279046	0.811608	0.00288974	0.0128582	-0.00474437	0.00190713	0.71774
SAMD1	0	1.82386e-21	2.97675e-107	4.68767e-13	0.0266935	0.274396	0.811783	0.00296743	0.0128667	-0.00405342	0.00162953	0.71774
GRM6	0	1.6522e-21	3.04181e-107	4.79631e-13	0.0267516	0.274786	0.80071	0.00326495	0.0128784	0.00101764	0.000409161	0.71774
SLC24A2	0	1.73375e-21	3.18942e-107	4.68421e-13	0.0259422	0.274975	0.807769	0.00307372	0.013013	0.00188534	0.000759163	0.71774
SMARCA2	0	1.79225e-21	2.94066e-107	4.32404e-13	0.0262049	0.270653	0.803517	0.00294882	0.0130891	0.00181123	0.000729934	0.71774
CYS1	0	1.70107e-21	3.27189e-107	4.75751e-13	0.0260881	0.275066	0.810147	0.00296369	0.0131036	-0.00540431	0.0021783	0.71774
C17orf80	0	1.69852e-21	2.10474e-107	4.72487e-13	0.0261293	0.276092	0.812247	0.00300571	0.0131042	-0.00281953	0.00113647	0.71774
ZNF572	0	1.63122e-21	3.47272e-107	4.76175e-13	0.0275165	0.273575	0.818121	0.00298244	0.0131914	0.00333897	0.00134712	0.71774
DUSP15	0	1.7165e-21	2.25341e-107	4.54487e-13	0.0257722	0.276922	0.802587	0.00277211	0.0132056	0.00141631	0.000571506	0.71774
LIPH	0	1.55294e-21	3.24063e-107	4.88971e-13	0.0267332	0.273294	0.803227	0.00298057	0.0132089	0.00332929	0.00134347	0.71774
HHIP	0	1.8913e-21	2.48272e-107	4.37162e-13	0.0267517	0.27473	0.811808	0.00290728	0.0132512	0.00277138	0.00111885	0.71774
PI4K2B	0	1.65862e-21	3.10708e-107	4.95081e-13	0.0265965	0.279826	0.81199	0.00295581	0.0132524	0.00266218	0.00107479	0.71774
NMUR2	0	1.74459e-21	3.5414e-107	4.23983e-13	0.0270223	0.270216	0.805042	0.00297631	0.013258	0.0019166	0.000773824	0.71774
SHROOM1	0	1.73494e-21	2.98914e-107	4.39544e-13	0.0259502	0.274165	0.811348	0.00276456	0.0133142	-0.00153998	0.000622143	0.71774
ZSCAN5B	0	1.97145e-21	3.15591e-107	4.51059e-13	0.0264535	0.273092	0.806664	0.0027431	0.0133483	0.00161662	0.000653346	0.71774
CEP104	0	1.5847e-21	3.94578e-107	4.34907e-13	0.0268298	0.272218	0.812853	0.00303503	0.01337	0.00111125	0.000449208	0.71774
FNDC11	0	1.76444e-21	3.30745e-107	4.12127e-13	0.0268392	0.276817	0.807807	0.00291266	0.0134065	-0.00267447	0.00108155	0.71774
MLYCD	0	1.86891e-21	2.61171e-107	4.53974e-13	0.026368	0.274803	0.798184	0.00282841	0.013458	0.00189948	0.000768571	0.71774
SPINK1	0	1.897e-21	3.13423e-107	4.39263e-13	0.0257777	0.272309	0.809198	0.00339038	0.0134745	0.00258514	0.00104619	0.71774
DCLK3	0	1.53816e-21	2.6311e-107	4.49967e-13	0.0266952	0.27706	0.808767	0.00313847	0.01351	-0.0024458	0.000990178	0.71774
POLL	0	1.61582e-21	3.0981e-107	4.73526e-13	0.0262848	0.280584	0.80645	0.00292656	0.0136033	0.00134532	0.000545196	0.71774
CCNG1	0	1.61488e-21	2.45584e-107	4.84527e-13	0.0263504	0.277919	0.797374	0.0029082	0.0136307	0.00387966	0.0015727	0.71774
TPMT	0	1.75795e-21	2.58279e-107	4.78441e-13	0.0266054	0.27666	0.816903	0.00286522	0.0136715	-0.00140331	0.000569105	0.71774
SSX1	0	4.26549e-21	3.00479e-107	4.36958e-13	0.0268546	0.273076	0.807047	0.00284367	0.0136917	-0.00479362	0.00194445	0.71774
TMPRSS15	0	1.94476e-21	2.87748e-107	4.58889e-13	0.0264679	0.277023	0.805605	0.00290731	0.0136926	-0.000860489	0.000349046	0.71774
CD248	0	1.82431e-21	3.34477e-107	4.41688e-13	0.0264088	0.275333	0.814326	0.00320031	0.0138028	-0.00126768	0.000514817	0.721477
UCMA	0	1.7587e-21	3.1187e-107	4.33868e-13	0.0260828	0.268506	0.811875	0.00297385	0.0138683	0.00260337	0.00105799	0.722865
MAGEA8	0	8.50285e-22	3.16779e-107	4.85847e-13	0.0268536	0.275482	0.807994	0.00268785	0.0140432	0.00659351	0.00268445	0.725184
NSUN4	0	1.81044e-21	2.72829e-107	4.33871e-13	0.0264214	0.277317	0.813578	0.00307925	0.0140526	-0.00221954	0.000903741	0.725184
MYH2	0	1.64152e-21	2.34366e-107	4.015e-13	0.0266079	0.282356	0.81865	0.00326005	0.0140946	-0.0007618	0.000310322	0.725184
MNAT1	0	1.6134e-21	2.27058e-107	4.52465e-13	0.0267316	0.280353	0.802221	0.00290078	0.0141412	-0.00450721	0.00183691	0.725184
DFFA	0	1.84968e-21	2.20523e-107	4.42031e-13	0.0265614	0.272123	0.803205	0.00320228	0.0141741	-0.00130093	0.000530376	0.725184
SELENOW	0	1.66431e-21	2.4295e-107	4.69225e-13	0.0260413	0.278619	0.818953	0.00301465	0.0141807	0.00702358	0.00286363	0.725184
ASH1L	0	1.72359e-21	2.39171e-107	4.73313e-13	0.02644	0.27052	0.803483	0.00284714	0.0141863	-0.00105121	0.000428619	0.725184
PREP	0	1.88901e-21	2.29076e-107	4.55325e-13	0.0265989	0.270411	0.814332	0.00283628	0.0142938	-0.00222265	0.00090727	0.727296
C1orf216	0	1.93684e-21	2.54509e-107	4.39764e-13	0.0261941	0.269474	0.807997	0.00279551	0.0143061	-0.00190654	0.000778333	0.727296
ZNF384	0	1.82645e-21	3.03363e-107	4.57269e-13	0.0262999	0.277565	0.800583	0.00309702	0.0144464	0.00264773	0.00108247	0.729748
SMIM18	0	1.72302e-21	3.24893e-107	4.61859e-13	0.0268151	0.275952	0.802815	0.00301602	0.0144469	-0.00917673	0.00375175	0.729748
GPC4	0	3.78873e-21	2.78688e-107	4.37829e-13	0.0259212	0.275364	0.81521	0.00303922	0.0145021	-0.00329333	0.00134718	0.729748
FRZB	0	1.68586e-21	2.5989e-107	4.46518e-13	0.0267104	0.27704	0.813125	0.00289152	0.0145116	0.00143054	0.000585239	0.729748
ITGB3	0	1.74718e-21	2.29857e-107	4.79591e-13	0.025658	0.267089	0.806198	0.00278182	0.0145583	-0.00158882	0.000650299	0.730118
WFS1	0	1.62037e-21	4.22714e-107	4.06927e-13	0.0269799	0.27639	0.80649	0.00302511	0.0147311	0.000711858	0.00029187	0.735088
STAB2	0	1.55738e-21	1.89105e-107	4.29836e-13	0.0265588	0.27484	0.81274	0.00307486	0.0147366	0.000823395	0.000337621	0.735088
SDR39U1	0	1.60828e-21	2.61405e-107	4.40906e-13	0.0272232	0.276892	0.813412	0.00308857	0.0149254	-0.00123067	0.000505571	0.739941
KIR2DL4	0	1.75488e-21	2.96272e-107	4.6064e-13	0.0262444	0.275393	0.813673	0.00302568	0.014952	-0.00492492	0.00202374	0.739941
AXIN1	0	1.64321e-21	2.8869e-107	4.48876e-13	0.0266133	0.277539	0.809515	0.00286294	0.0149535	0.00137152	0.000563591	0.739941
ODF3L1	0	1.61159e-21	3.00453e-107	4.3363e-13	0.0259264	0.277686	0.807905	0.00293663	0.0150354	0.0032955	0.00135531	0.741099
MEI4	0	2.01635e-21	2.6558e-107	4.66809e-13	0.0257185	0.275329	0.808343	0.00309539	0.0150673	-0.0030438	0.00125219	0.741099
INTS1	0	1.68369e-21	2.43502e-107	4.34307e-13	0.026804	0.27344	0.800153	0.00282123	0.0151433	0.00112195	0.000461905	0.741099
RNF111	0	1.84549e-21	2.83727e-107	4.46986e-13	0.0268283	0.27696	0.81554	0.00299889	0.0151821	0.00154473	0.000636206	0.741099
AKAP14	0	2.48758e-21	2.55298e-107	4.57502e-13	0.026193	0.270785	0.806044	0.00287839	0.0152097	-0.0106275	0.00437818	0.741099
OR5K3	0	1.83975e-21	2.7669e-107	4.66127e-13	0.0264775	0.283298	0.804711	0.0030893	0.0152318	0.00360773	0.00148659	0.741099
ACAD8	0	1.60608e-21	2.34445e-107	4.39176e-13	0.0265537	0.276347	0.816761	0.00315064	0.015293	0.0019648	0.000810094	0.741099
TLCD1	0	1.76432e-21	3.55879e-107	4.62376e-13	0.026716	0.27521	0.799276	0.00303442	0.0153302	0.00298091	0.00122949	0.741099
TCAP	0	1.75373e-21	3.03094e-107	4.39321e-13	0.0255794	0.275087	0.805813	0.00292001	0.0153389	-0.00137969	0.000569106	0.741099
KRT79	0	1.72822e-21	2.71436e-107	4.44374e-13	0.0259905	0.280293	0.816235	0.00314404	0.0154427	-0.00136565	0.000563884	0.741099
ABCB11	0	1.72677e-21	3.01947e-107	4.44702e-13	0.027063	0.276753	0.80932	0.00286556	0.0154801	0.001413	0.00058365	0.741099
LAMA5	0	1.96476e-21	2.68478e-107	4.2397e-13	0.0258886	0.278459	0.801007	0.00291505	0.0154964	-0.000493189	0.000203747	0.741099
ESCO1	0	1.65344e-21	3.01264e-107	4.4339e-13	0.0260545	0.27634	0.809156	0.00304834	0.0155512	0.00229328	0.000947907	0.741099
BSPRY	0	1.73704e-21	2.34389e-107	4.58676e-13	0.0269633	0.27526	0.807999	0.00299061	0.0155958	0.00173292	0.000716593	0.741099
C17orf75	0	1.79008e-21	3.25147e-107	4.23508e-13	0.0265808	0.275757	0.809113	0.00303342	0.0156485	0.00381143	0.0015769	0.741099
MCTP1	0	1.56305e-21	2.84098e-107	4.46966e-13	0.0265387	0.272371	0.80829	0.00298572	0.0156837	0.00224149	0.000927682	0.741099
IFT172	0	1.88823e-21	2.38932e-107	4.82599e-13	0.026587	0.276158	0.799185	0.00306172	0.0156899	0.000848124	0.000351033	0.741099
GPR22	0	1.65972e-21	3.11833e-107	4.73673e-13	0.0265922	0.27803	0.803675	0.00289794	0.0157425	0.00668137	0.00276677	0.741099
FAM20A	0	1.69119e-21	2.25712e-107	4.12979e-13	0.0260039	0.275363	0.804268	0.00300882	0.0157452	0.00169147	0.00070046	0.741099
TCTEX1D2	0	1.85938e-21	2.53146e-107	4.4472e-13	0.0270624	0.27312	0.80089	0.00295321	0.0158024	0.00155368	0.000643752	0.741099
SLC25A22	0	1.74462e-21	2.47078e-107	4.21205e-13	0.0269687	0.274724	0.819215	0.00284814	0.0158302	-0.00343127	0.00142209	0.741099
LSM14A	0	1.82739e-21	2.99692e-107	4.69149e-13	0.026508	0.272003	0.808219	0.0031018	0.0158719	-0.00211191	0.000875631	0.741099
CACNA2D1	0	1.73969e-21	2.8399e-107	4.44839e-13	0.0266484	0.274484	0.806951	0.00286913	0.0158955	-0.00179477	0.000744306	0.741099
SLC22A13	0	1.73757e-21	2.62977e-107	4.39901e-13	0.0265685	0.271586	0.806842	0.00290143	0.0159513	0.00181717	0.000753997	0.741836
ADAM8	0	1.67216e-21	3.24047e-107	4.37418e-13	0.0259418	0.274983	0.811814	0.00287552	0.0160457	-0.00151835	0.000630572	0.74436
CNOT11	0	1.74112e-21	3.25152e-107	4.63504e-13	0.0260809	0.270253	0.810587	0.00301856	0.016106	0.00329506	0.00136922	0.744618
PRRC2C	0	1.68838e-21	3.12566e-107	4.25193e-13	0.0260478	0.274966	0.812525	0.00282164	0.0161515	0.00126306	0.000525073	0.744618
OCRL	0	5.61808e-22	2.76695e-107	4.69073e-13	0.0262622	0.278923	0.815702	0.00302946	0.0161981	0.00295255	0.00122795	0.744618
CR1	0	2.01732e-21	2.69688e-107	4.31719e-13	0.0254212	0.27838	0.812829	0.00286671	0.0162118	-0.00137303	0.000571111	0.744618
RYK	0	1.82308e-21	2.992e-107	4.30082e-13	0.0262393	0.276538	0.794991	0.00308138	0.0162962	-0.00266161	0.00110797	0.745832
CRABP1	0	1.6187e-21	2.09706e-107	4.46831e-13	0.0261171	0.276578	0.81081	0.00297657	0.0163367	-0.00574612	0.00239289	0.745832
ERVV-2	0	1.60746e-21	3.40086e-107	4.85514e-13	0.0269195	0.273798	0.806577	0.00316386	0.0163738	-0.00261212	0.00108816	0.745832
ARMCX4	0	4.3361e-21	3.11451e-107	4.50644e-13	0.0257834	0.279494	0.800888	0.00286726	0.0164018	-0.001653	0.000688787	0.745832
CH25H	0	1.85336e-21	2.9355e-107	4.63538e-13	0.0270766	0.277715	0.808103	0.0031131	0.01646	0.00591671	0.00246676	0.745832
GPS2	0	1.77752e-21	3.46098e-107	4.69501e-13	0.0264663	0.27458	0.812924	0.00317802	0.0165126	-0.00503336	0.0020995	0.745832
SUZ12	0	1.67261e-21	2.66515e-107	4.58212e-13	0.0264122	0.27607	0.799734	0.00297765	0.0165234	0.00241518	0.00100751	0.745832
IKBKE	0	1.7095e-21	2.28852e-107	4.62094e-13	0.0257752	0.277352	0.811562	0.00282658	0.0165598	-0.00194489	0.000811599	0.745832
ZNF674	0	6.42963e-21	2.58004e-107	4.66324e-13	0.0268328	0.274397	0.809765	0.00295026	0.0166352	-0.00128	0.000534514	0.747416
TNFAIP8L1	0	1.54383e-21	2.53569e-107	4.45072e-13	0.0262795	0.274848	0.809788	0.00316725	0.0167624	0.00448282	0.00187416	0.751125
RAB30	0	1.833e-21	2.19082e-107	4.69586e-13	0.0265277	0.275451	0.814836	0.0029337	0.0168653	0.00751697	0.00314562	0.751125
HBE1	0	1.72868e-21	2.91414e-107	4.53469e-13	0.0262406	0.274446	0.813162	0.00308467	0.0169539	0.00617824	0.00258749	0.751125
ZNF548	0	1.8022e-21	2.58522e-107	4.64146e-13	0.0271002	0.271489	0.803218	0.00298719	0.0169724	0.00239327	0.00100249	0.751125
BEND5	0	1.70766e-21	3.22992e-107	4.60306e-13	0.0270706	0.274281	0.803279	0.00281365	0.0169936	0.00267196	0.00111944	0.751125
OR4B1	0	1.58702e-21	2.48489e-107	4.4648e-13	0.0271927	0.274881	0.815064	0.00297368	0.0170024	-0.00321319	0.0013463	0.751125
PSME1	0	1.85468e-21	2.56203e-107	4.6593e-13	0.0262878	0.276938	0.817997	0.00310742	0.0170724	0.00353344	0.00148142	0.751125
WLS	0	1.65329e-21	3.59245e-107	4.36062e-13	0.0261736	0.27089	0.803903	0.00296551	0.0170731	0.00226263	0.00094863	0.751125
RHBDD3	0	1.74867e-21	2.89646e-107	4.32746e-13	0.0261774	0.276371	0.814472	0.00303171	0.0171119	0.00268103	0.00112444	0.751125
COG5	0	1.71393e-21	2.84121e-107	4.57775e-13	0.0260455	0.276763	0.80325	0.00315382	0.0171226	0.00159752	0.000670076	0.751125
LRMDA	0	1.67522e-21	2.26398e-107	4.66558e-13	0.026262	0.276684	0.809784	0.0029167	0.0172343	0.00339089	0.00142373	0.751125
RNF114	0	1.72513e-21	2.44503e-107	4.45325e-13	0.0267381	0.273648	0.8152	0.0032272	0.0172349	0.00204068	0.000856821	0.751125
ZBTB7C	0	1.95444e-21	3.0765e-107	4.58596e-13	0.026428	0.275809	0.79857	0.0026566	0.0173194	0.00142203	0.000597522	0.751125
SMIM2	0	1.68384e-21	3.18126e-107	4.27771e-13	0.0258904	0.274994	0.805678	0.00282591	0.0173501	-0.00574214	0.00241345	0.751125
CLNK	0	1.91968e-21	2.66205e-107	4.45563e-13	0.0270951	0.271761	0.807851	0.00335356	0.0173535	-0.00118195	0.000496791	0.751125
TRIM6-TRIM34	0	1.87184e-21	2.61864e-107	4.52473e-13	0.0260993	0.273242	0.811327	0.00296658	0.0174094	-0.0657186	0.0276364	0.751125
EIF3K	0	1.79404e-21	2.82234e-107	4.17608e-13	0.0263351	0.274215	0.802447	0.00289768	0.0174611	-0.00340457	0.00143237	0.751125
STARD3	0	2.07257e-21	2.35638e-107	4.36889e-13	0.0256713	0.275338	0.798801	0.00303291	0.0175506	0.0018726	0.000788464	0.751125
PKHD1L1	0	1.77057e-21	2.56362e-107	4.40612e-13	0.0257271	0.274839	0.800427	0.00281298	0.0176158	-0.000498237	0.000209905	0.751125
C4orf3	0	1.70096e-21	3.41717e-107	4.35724e-13	0.0265987	0.273096	0.808387	0.00328092	0.0177775	-0.005824	0.00245713	0.751125
R3HDM4	0	1.66617e-21	2.77256e-107	4.65628e-13	0.026948	0.273935	0.812933	0.00295521	0.0177998	-0.00205781	0.000868354	0.751125
CKMT2	0	1.48434e-21	2.71431e-107	4.65037e-13	0.0272977	0.268616	0.806849	0.00288973	0.0178673	0.00197801	0.000835175	0.751125
TSHZ2	0	1.9264e-21	2.92467e-107	4.13232e-13	0.0270001	0.272979	0.809479	0.00290632	0.017905	-0.00122945	0.000519279	0.751125
DTYMK	0	1.73851e-21	2.71477e-107	4.70518e-13	0.0269578	0.278883	0.814869	0.00296377	0.0179229	0.0042093	0.00177815	0.751125
OR5AK2	0	1.58272e-21	3.85457e-107	4.95154e-13	0.0262309	0.271175	0.802569	0.00307066	0.0179333	0.00524113	0.00221423	0.751125
PNLDC1	0	1.75888e-21	1.77392e-107	4.5906e-13	0.0267075	0.274157	0.817578	0.00308587	0.0179826	0.00223762	0.000945737	0.751125
MOCS2	0	1.65445e-21	3.80657e-107	4.54684e-13	0.0266468	0.280271	0.804752	0.00290723	0.0179933	-0.00119596	0.000505524	0.751125
PICK1	0	1.66463e-21	2.74069e-107	5.05722e-13	0.0258156	0.275768	0.807474	0.00297127	0.0180162	0.00237614	0.00100458	0.751125
TUB	0	1.67717e-21	2.90648e-107	4.40778e-13	0.0260995	0.274632	0.806798	0.00269701	0.0180321	-0.000916744	0.000387632	0.751125
ZNF471	0	1.61026e-21	2.7599e-107	4.74821e-13	0.0266141	0.273909	0.807914	0.00300263	0.0180396	-0.00211237	0.000893244	0.751125
RBMXL2	0	1.52416e-21	2.61162e-107	4.45756e-13	0.0267375	0.272825	0.813258	0.0030667	0.0180578	-0.0018464	0.000780897	0.751125
BTNL9	0	1.67761e-21	2.28871e-107	4.43805e-13	0.0270683	0.271705	0.806405	0.00293402	0.0181052	0.00255337	0.00108034	0.751125
CHAC2	0	1.74758e-21	2.65694e-107	4.60417e-13	0.0264954	0.274885	0.808029	0.00329513	0.0181847	-0.00167411	0.000708811	0.751125
TEX2	0	1.69231e-21	2.96647e-107	4.55909e-13	0.0266219	0.276102	0.813834	0.00294091	0.0182677	0.00174616	0.000739844	0.751125
SLC47A2	0	1.8407e-21	3.11213e-107	4.28704e-13	0.0256663	0.273659	0.803715	0.00275017	0.018315	-0.00144628	0.000613035	0.751125
VCAM1	0	1.89042e-21	2.55543e-107	4.44288e-13	0.0262373	0.278503	0.810876	0.00305507	0.0183468	-0.00246829	0.00104652	0.751125
ZFP64	0	1.78961e-21	3.09833e-107	4.58615e-13	0.0266361	0.27126	0.806777	0.00303066	0.0183705	0.00207023	0.000877926	0.751125
RXRA	0	1.7207e-21	2.91778e-107	4.68902e-13	0.0261536	0.27626	0.8016	0.00291055	0.0183871	0.00245087	0.00103949	0.751125
PAGE1	0	4.74034e-21	2.448e-107	4.34207e-13	0.0248947	0.278336	0.807475	0.00293515	0.0184027	-0.00364777	0.00154734	0.751125
SRSF2	0	1.7774e-21	2.09311e-107	4.81623e-13	0.0255427	0.272571	0.802536	0.00302548	0.018523	0.00675104	0.00286666	0.751125
C3orf67	0	1.68034e-21	3.07229e-107	4.6391e-13	0.0269112	0.278556	0.8121	0.00288874	0.0185441	0.00242406	0.0010295	0.751125
KLHL42	0	1.77334e-21	2.74269e-107	4.57454e-13	0.0259466	0.275444	0.803907	0.00303623	0.0185535	0.00523009	0.0022214	0.751125
FAM89B	0	1.63548e-21	2.54443e-107	4.61655e-13	0.0260036	0.277805	0.807496	0.00303483	0.0186078	-0.00453015	0.001925	0.751125
TRPC3	0	1.59552e-21	2.38663e-107	4.50564e-13	0.0262824	0.276302	0.806208	0.0028798	0.0186501	-0.00205239	0.000872435	0.751125
FLOT2	0	1.72268e-21	2.30369e-107	4.73424e-13	0.0268558	0.273099	0.814569	0.00292283	0.0186649	-0.00227297	0.000966322	0.751125
PRKDC	0	1.88637e-21	2.57869e-107	4.26571e-13	0.0265411	0.273726	0.798274	0.00273716	0.0186728	-0.000969796	0.000412324	0.751125
ASXL2	0	1.7285e-21	2.62061e-107	4.69542e-13	0.0267128	0.272039	0.813896	0.00282515	0.0186854	0.00152792	0.000649688	0.751125
ERI3	0	1.63035e-21	2.02112e-107	4.76203e-13	0.0271298	0.273913	0.810291	0.00359681	0.0187045	-0.00342923	0.00145838	0.751125
MAP3K9	0	1.6729e-21	2.74874e-107	4.3042e-13	0.0266437	0.27893	0.807491	0.00282931	0.0187499	-0.00115822	0.000492756	0.751125
THAP7	0	1.82405e-21	2.80469e-107	4.52574e-13	0.026359	0.270482	0.814575	0.00289496	0.0187781	0.00194518	0.000827759	0.751125
NCAPH	0	1.82617e-21	2.90893e-107	4.35993e-13	0.0260227	0.277506	0.80216	0.00302736	0.0188599	-0.0019083	0.000812627	0.751125
RNF7	0	1.8065e-21	2.88087e-107	4.62858e-13	0.0260489	0.275765	0.801654	0.0028772	0.0188619	-0.0101617	0.00432731	0.751125
EPS15	0	1.831e-21	3.56164e-107	4.7156e-13	0.0261446	0.272883	0.811503	0.00266404	0.0188631	-0.00206971	0.000881383	0.751125
ZNF671	0	1.75572e-21	3.64675e-107	4.74165e-13	0.0265797	0.271098	0.803663	0.00285596	0.0190172	0.00313031	0.00133476	0.752862
CARMIL2	0	1.83158e-21	2.67554e-107	4.49732e-13	0.0262912	0.278182	0.810891	0.00289619	0.0190188	-0.000862048	0.000367582	0.752862
RANBP2	0	1.6102e-21	2.46776e-107	4.55917e-13	0.0271289	0.275249	0.806331	0.00322009	0.0190285	0.00105175	0.000448507	0.752862
MTF2	0	1.70038e-21	4.32431e-107	4.47419e-13	0.0270673	0.27921	0.809859	0.0029353	0.0191543	0.0041527	0.00177274	0.755456
BMPR1A	0	1.80315e-21	2.87381e-107	4.50367e-13	0.026402	0.27323	0.811739	0.00313168	0.0191883	-0.00203328	0.000868226	0.755456
IDH3G	0	9.38468e-22	2.72003e-107	4.23559e-13	0.026757	0.273318	0.8066	0.00295698	0.0193229	0.0074745	0.00319523	0.755456
GP1BA	0	1.70844e-21	2.84776e-107	4.4134e-13	0.0262588	0.274354	0.798791	0.0030212	0.0193752	0.00287319	0.00122877	0.755456
SMIM7	0	1.69908e-21	2.23561e-107	4.59322e-13	0.0259589	0.276133	0.803229	0.00310226	0.0194068	0.00332242	0.00142126	0.755456
PROP1	0	1.70728e-21	2.32705e-107	4.18539e-13	0.0257799	0.274767	0.809809	0.0030343	0.0194209	-0.00292404	0.00125099	0.755456
ZNF705D	0	1.68298e-21	3.02233e-107	4.4358e-13	0.0262358	0.273525	0.806321	0.00267023	0.0194929	0.00298246	0.00127674	0.755456
ACP5	0	1.75345e-21	3.15589e-107	4.61796e-13	0.0267593	0.279876	0.806525	0.00304696	0.019547	0.00223554	0.000957422	0.755456
PRKRA	0	1.8825e-21	2.82076e-107	4.637e-13	0.0261536	0.273432	0.805414	0.00288663	0.0195581	-0.0034393	0.00147309	0.755456
FBXO45	0	1.70276e-21	2.40936e-107	4.45374e-13	0.0253868	0.273842	0.8133	0.00313308	0.0195657	-0.00751174	0.00321757	0.755456
WNT8B	0	1.89941e-21	2.4973e-107	4.59662e-13	0.0265047	0.276673	0.804632	0.00301484	0.0196077	0.00453317	0.0019424	0.755456
ST8SIA4	0	1.76385e-21	3.38816e-107	4.6398e-13	0.0269417	0.278441	0.818417	0.00299343	0.0196157	0.00435028	0.00186416	0.755456
AGPS	0	1.77752e-21	2.81741e-107	4.73376e-13	0.0269657	0.27962	0.807132	0.00302684	0.0196233	0.0039509	0.00169312	0.755456
GNAT1	0	1.73641e-21	2.29078e-107	4.36973e-13	0.0265508	0.276219	0.810334	0.00287512	0.0197042	-0.00228213	0.000978632	0.757
TTC28	0	1.57666e-21	2.05973e-107	4.46741e-13	0.0266635	0.269492	0.818204	0.0031297	0.019826	0.000708717	0.000304216	0.759535
SMPDL3B	0	1.87847e-21	2.6062e-107	4.33715e-13	0.0264318	0.277561	0.807287	0.00294219	0.019852	0.00216515	0.000929583	0.759535
LSP1	0	1.76386e-21	2.48251e-107	4.38101e-13	0.0266183	0.273997	0.811886	0.00294901	0.0199959	0.00196033	0.000842627	0.762908
OR10AG1	0	1.80698e-21	2.41494e-107	4.62498e-13	0.0269554	0.273898	0.808866	0.00301315	0.0200224	-0.00375008	0.00161228	0.762908
GLG1	0	1.88549e-21	3.29881e-107	4.23224e-13	0.0268002	0.270396	0.815459	0.00296819	0.0200792	0.00214236	0.000921488	0.763505
HMGN3	0	1.59055e-21	2.9802e-107	4.56462e-13	0.0259481	0.274285	0.809612	0.00290521	0.0201488	-0.00485133	0.00208786	0.764333
OR5V1	0	1.73624e-21	2.47624e-107	4.63221e-13	0.0267667	0.269877	0.812444	0.00304909	0.0201834	-0.0016722	0.000719862	0.764333
EIF3M	0	1.73561e-21	2.98516e-107	4.38833e-13	0.0266985	0.276058	0.810827	0.00302722	0.0204684	0.00363728	0.00156937	0.773548
FUT6	0	1.88851e-21	2.69962e-107	4.16125e-13	0.0263625	0.278758	0.801215	0.00306819	0.0206355	-0.00223694	0.000966444	0.775457
DMPK	0	1.81703e-21	2.88198e-107	4.46701e-13	0.0256564	0.27569	0.809393	0.00285132	0.0207449	-0.00148153	0.00064063	0.775457
NPC1L1	0	1.90882e-21	3.42806e-107	4.40583e-13	0.0265334	0.276975	0.809629	0.00285561	0.0207567	-0.00122112	0.000528074	0.775457
NLRP5	0	1.61159e-21	2.77069e-107	4.62904e-13	0.0265571	0.273315	0.808643	0.00310933	0.0207946	-0.00136586	0.000590844	0.775457
HMGA1	0	1.67166e-21	3.15564e-107	4.24388e-13	0.0266427	0.274611	0.815573	0.00292581	0.0208117	-0.0105084	0.00454633	0.775457
TF	0	1.91764e-21	2.58995e-107	4.51132e-13	0.0260522	0.271297	0.812008	0.00283815	0.0208381	-0.0012377	0.000535587	0.775457
DEFB135	0	1.84916e-21	2.34284e-107	4.26918e-13	0.0265542	0.275061	0.817759	0.00294216	0.0208733	-0.00372385	0.00161185	0.775457
METTL23	0	1.74514e-21	2.58021e-107	4.22457e-13	0.0266694	0.270558	0.812562	0.00297912	0.0209127	0.00182893	0.000791887	0.775457
DEXI	0	1.77887e-21	2.47157e-107	4.54887e-13	0.0258622	0.276597	0.801555	0.00311219	0.0209793	0.00756967	0.00327921	0.775457
SORL1	0	1.72081e-21	2.61509e-107	4.27982e-13	0.0256972	0.273117	0.810825	0.0031453	0.0210334	-0.00091548	0.000396757	0.775457
CACFD1	0	1.70421e-21	3.2947e-107	4.38037e-13	0.0263301	0.27449	0.800405	0.00296641	0.0210434	-0.0017746	0.000769145	0.775457
CNPY2	0	1.72794e-21	2.39518e-107	4.06176e-13	0.0262676	0.276114	0.813077	0.00317193	0.0210454	0.00380726	0.00165017	0.775457
INPP4A	0	1.88615e-21	3.61481e-107	4.11212e-13	0.0257932	0.275639	0.804304	0.00297741	0.0210661	-0.00168214	0.000729201	0.775457
HELB	0	1.68151e-21	2.8262e-107	4.88939e-13	0.026811	0.275244	0.814271	0.00294204	0.021104	0.00137648	0.000596877	0.775457
UMOD	0	1.81149e-21	3.36142e-107	4.64052e-13	0.0260616	0.270404	0.80665	0.00296657	0.0213563	-0.00195552	0.000849614	0.778267
PTPRT	0	1.765e-21	2.42898e-107	4.10892e-13	0.0263459	0.278742	0.811663	0.00326762	0.021357	0.000715962	0.000311066	0.778267
HRAS	0	1.59702e-21	2.16337e-107	4.58401e-13	0.026691	0.279265	0.813858	0.00303415	0.021403	0.00329494	0.00143207	0.778267
TMEM165	0	1.6934e-21	2.56173e-107	4.23815e-13	0.0271444	0.274262	0.813791	0.00284498	0.0214183	-0.00476717	0.00207218	0.778267
CASP4	0	1.80446e-21	2.53595e-107	4.28631e-13	0.0261634	0.276151	0.815284	0.00286744	0.0214784	0.00256452	0.00111525	0.778267
GADL1	0	1.82378e-21	2.94911e-107	4.46665e-13	0.0262203	0.276351	0.814167	0.00300687	0.0214812	0.00153311	0.000666731	0.778267
ZNF274	0	1.95029e-21	2.86738e-107	4.58539e-13	0.0270294	0.270207	0.797576	0.00293083	0.0214961	-0.0029873	0.00129929	0.778267
FBXO22	0	1.72847e-21	2.40724e-107	4.47756e-13	0.0263918	0.278223	0.803927	0.0027076	0.0216009	-0.00199374	0.000867849	0.778267
SPCS2	0	1.62604e-21	2.32429e-107	4.82884e-13	0.027149	0.276254	0.812701	0.00285667	0.0216482	0.0085955	0.00374286	0.778267
TG	0	1.70922e-21	2.09142e-107	4.52421e-13	0.0260011	0.271063	0.814913	0.00312817	0.0217375	0.000647685	0.000282222	0.778267
AFF4	0	1.84055e-21	2.96588e-107	4.3401e-13	0.0264915	0.273514	0.800048	0.00280565	0.0217388	-0.00229991	0.00100217	0.778267
EFCAB5	0	1.69743e-21	2.49118e-107	4.44015e-13	0.0261527	0.273061	0.806477	0.0030822	0.0217469	0.00099283	0.000432646	0.778267
GOLT1B	0	1.65515e-21	2.66133e-107	4.77573e-13	0.0263454	0.27826	0.802996	0.00272556	0.0217489	-0.00757639	0.00330162	0.778267
UTS2	0	1.75802e-21	2.47856e-107	4.32541e-13	0.0266335	0.26955	0.80831	0.00295195	0.0218394	0.0079852	0.00348216	0.778267
ACSM2B	0	1.87992e-21	3.16423e-107	4.30964e-13	0.0261141	0.280807	0.814525	0.00282025	0.021845	0.000992216	0.000432701	0.778267
AK4	0	1.71302e-21	2.11182e-107	4.28451e-13	0.026347	0.27454	0.807557	0.00303011	0.0218941	0.00416281	0.00181606	0.778267
SAE1	0	1.7872e-21	3.06035e-107	4.41841e-13	0.0263077	0.269302	0.80935	0.00282356	0.0219333	-0.00348506	0.00152084	0.778267
CDC34	0	1.81669e-21	2.86266e-107	4.61752e-13	0.026119	0.27477	0.808113	0.00284805	0.0219354	-0.00378238	0.0016506	0.778267
MBLAC1	0	1.9523e-21	2.62335e-107	4.36183e-13	0.0263356	0.27272	0.807866	0.00319297	0.0219897	0.00303482	0.00132492	0.778704
OR2F1	0	1.60306e-21	3.06992e-107	4.95987e-13	0.0270282	0.273018	0.809182	0.00284623	0.0220479	0.00257166	0.00112321	0.779279
NBPF4	0	1.77871e-21	2.90692e-107	4.49966e-13	0.0256638	0.272869	0.803237	0.00287523	0.0221615	-0.00235077	0.00102761	0.779827
CHD1L	0	1.70408e-21	2.17103e-107	4.48036e-13	0.0265478	0.273598	0.799171	0.00301313	0.0222659	-0.00138731	0.000606918	0.779827
NARS2	0	1.81119e-21	2.68962e-107	4.40943e-13	0.0261332	0.276395	0.802861	0.00291937	0.0223016	-0.00191446	0.00083776	0.779827
RTN1	0	1.673e-21	3.03419e-107	4.67755e-13	0.0255798	0.273568	0.80285	0.00282714	0.022369	-0.0020789	0.000910174	0.779827
SIAE	0	1.86185e-21	2.42431e-107	4.63624e-13	0.0262048	0.280152	0.809072	0.00309013	0.0224113	-0.00148906	0.000652139	0.779827
LRRC46	0	1.60446e-21	2.71866e-107	4.58056e-13	0.0258572	0.270566	0.804833	0.00289749	0.0224314	-0.00305701	0.00133903	0.779827
MRPS35	0	1.57727e-21	2.74151e-107	4.39773e-13	0.0260627	0.274763	0.811873	0.00289377	0.0225184	-0.00207658	0.000910169	0.779827
NDRG3	0	1.78697e-21	2.97443e-107	4.60572e-13	0.0266407	0.275264	0.810506	0.00285686	0.0225579	-0.00357671	0.00156814	0.779827
RECQL4	0	1.80723e-21	2.82548e-107	4.35289e-13	0.0266229	0.273605	0.805704	0.00304716	0.0225702	0.000886536	0.00038872	0.779827
VPS54	0	1.75428e-21	3.11019e-107	4.54487e-13	0.0268982	0.277318	0.808629	0.00301967	0.0225755	-0.00149803	0.000656869	0.779827
SLC35F4	0	1.77446e-21	2.4249e-107	4.41176e-13	0.0262734	0.271264	0.810785	0.00299761	0.0225794	0.00242106	0.00106163	0.779827
IST1	0	1.69005e-21	2.8228e-107	4.57629e-13	0.0262531	0.276628	0.805605	0.00304918	0.0225877	0.00339949	0.00149077	0.779827
ZSWIM8	0	1.63817e-21	2.65166e-107	4.451e-13	0.0274163	0.272637	0.803364	0.00305625	0.0226634	0.00148908	0.000653369	0.779827
HMGB1	0	1.71994e-21	2.93877e-107	4.49129e-13	0.0263887	0.277866	0.812722	0.00286127	0.022709	-0.00835251	0.00366608	0.779827
TBC1D15	0	1.72064e-21	2.4174e-107	4.29682e-13	0.0266816	0.272959	0.809278	0.00327065	0.0227272	0.00283497	0.00124449	0.779827
TAS2R39	0	1.95345e-21	2.97108e-107	4.61266e-13	0.0253427	0.275967	0.804636	0.00305274	0.0227406	-0.00258907	0.00113666	0.779827
ECHDC3	0	1.72609e-21	3.49596e-107	4.87256e-13	0.0264875	0.2727	0.805542	0.00288759	0.0227779	0.00375328	0.00164823	0.779827
SPIDR	0	1.71419e-21	3.08889e-107	4.52686e-13	0.0257054	0.271477	0.815416	0.00312624	0.0229605	-0.00243376	0.0010702	0.784631
TANC2	0	1.81931e-21	3.27951e-107	4.61129e-13	0.0253766	0.278619	0.802339	0.00295499	0.0231385	0.00139566	0.000614513	0.786232
CTNNB1	0	1.71849e-21	3.89508e-107	4.62532e-13	0.0258645	0.272881	0.802817	0.00290468	0.0231475	0.00379998	0.00167325	0.786232
GHSR	0	1.6594e-21	3.43864e-107	4.55184e-13	0.0264254	0.278162	0.813527	0.00298003	0.0231876	0.00264248	0.00116391	0.786232
SIGLEC1	0	1.64293e-21	3.01324e-107	4.79421e-13	0.0263746	0.271182	0.807281	0.00272397	0.023252	-0.000895288	0.000394523	0.786232
IFI27L2	0	1.73003e-21	3.20253e-107	4.47899e-13	0.0255421	0.274759	0.808384	0.00301554	0.0232599	-0.0101026	0.00445211	0.786232
BRD2	0	2.04441e-21	2.85809e-107	4.07539e-13	0.0266902	0.272616	0.803183	0.00319682	0.0233922	0.00170105	0.000750355	0.786232
RHOA	0	1.75239e-21	3.43673e-107	4.26774e-13	0.0264524	0.269514	0.811346	0.00294835	0.0234403	0.0144178	0.00636208	0.786232
MAIP1	0	1.67261e-21	2.46233e-107	4.26587e-13	0.0268373	0.27318	0.815831	0.00303674	0.0235967	0.0036678	0.0016203	0.786232
SLC2A8	0	1.64587e-21	4.42602e-107	5.08032e-13	0.0268708	0.274822	0.812425	0.00312939	0.0236142	0.0013417	0.000592788	0.786232
ACOT1	0	1.60875e-21	2.716e-107	4.26701e-13	0.0266083	0.274535	0.814726	0.00292652	0.0236466	-0.00450488	0.0019908	0.786232
CLCN2	0	2.05558e-21	3.56289e-107	4.65292e-13	0.0268601	0.276386	0.820006	0.00294984	0.0236597	-0.00106168	0.000469225	0.786232
PLEKHH1	0	1.81345e-21	2.65144e-107	4.87621e-13	0.0255135	0.273266	0.805802	0.00284794	0.0236664	-0.000552696	0.000244283	0.786232
KLK4	0	1.76205e-21	3.06482e-107	4.55141e-13	0.0262932	0.277865	0.804614	0.00306877	0.0236819	-0.00382546	0.00169098	0.786232
STON1	0	1.75957e-21	3.31755e-107	4.51923e-13	0.0263841	0.270431	0.803704	0.00305424	0.0236879	0.0179423	0.00793141	0.786232
RIN2	0	1.69964e-21	2.27723e-107	4.64539e-13	0.026549	0.270065	0.817918	0.0029661	0.0237035	0.000914156	0.00040415	0.786232
FOXR2	0	1.39542e-21	2.89686e-107	4.41798e-13	0.0272898	0.273477	0.802082	0.00302922	0.0237742	-0.00485056	0.00214552	0.786232
TEKT2	0	1.56585e-21	3.008e-107	4.75474e-13	0.0259602	0.275723	0.802085	0.00280535	0.0238081	-0.00189498	0.0008384	0.786232
TMEM131	0	1.60776e-21	3.32913e-107	4.63847e-13	0.0266948	0.270396	0.808623	0.00304385	0.0238366	0.00116456	0.000515345	0.786232
ST6GALNAC3	0	1.82967e-21	3.08361e-107	4.05468e-13	0.0265443	0.275945	0.810394	0.00286906	0.0239061	0.00268868	0.00119039	0.786232
PREX1	0	1.79227e-21	2.83069e-107	4.60311e-13	0.0268238	0.276101	0.810806	0.00304522	0.0239179	-0.000912038	0.00040383	0.786232
CSRNP2	0	1.89921e-21	2.75632e-107	5.00172e-13	0.0262279	0.275701	0.81004	0.00310191	0.023936	-0.00265246	0.0011746	0.786232
RHBDD1	0	1.61772e-21	2.98638e-107	4.81037e-13	0.0263016	0.275872	0.80862	0.00318959	0.0239672	0.00221305	0.000980231	0.786232
ZNF440	0	1.71478e-21	3.21958e-107	4.75001e-13	0.0267545	0.27402	0.810782	0.00289336	0.0239878	0.00126873	0.000562044	0.786232
ZBTB34	0	1.69481e-21	2.41519e-107	4.31414e-13	0.0265102	0.270991	0.80123	0.00281499	0.0240364	-0.00508455	0.00225322	0.786232
ZNF853	0	1.70745e-21	2.42363e-107	4.72403e-13	0.0267106	0.275894	0.819917	0.00314128	0.0241066	-0.0020856	0.000924695	0.786232
TPH2	0	1.70998e-21	3.02604e-107	4.73537e-13	0.0261467	0.278878	0.804938	0.00296242	0.024109	0.00193489	0.000857886	0.786232
GALNT14	0	1.84567e-21	2.60692e-107	5.30118e-13	0.0272196	0.271446	0.802178	0.00281111	0.0241841	0.00111549	0.000494846	0.7873
C11orf44	0	1.83423e-21	2.75125e-107	4.86421e-13	0.0265984	0.27792	0.816116	0.00298861	0.0244361	-0.0177734	0.0078985	0.792652
PSG4	0	1.62778e-21	2.37315e-107	5.1081e-13	0.0258651	0.273105	0.811615	0.00281804	0.0244515	-0.00273982	0.00121771	0.792652
GBP1	0	1.91199e-21	2.83825e-107	4.40557e-13	0.0267024	0.274436	0.815372	0.003259	0.0244767	-0.001885	0.000837931	0.792652
SOX1	0	1.8566e-21	2.75253e-107	4.76203e-13	0.0259851	0.276338	0.801849	0.00288083	0.0245892	-0.00415315	0.00184764	0.793157
TBCB	0	1.74517e-21	2.72573e-107	4.9983e-13	0.0260187	0.277569	0.80603	0.00304724	0.0246047	0.00387348	0.0017234	0.793157
ZNF780A	0	1.79742e-21	3.33042e-107	4.39153e-13	0.0267048	0.27329	0.812837	0.0030586	0.024621	-0.00139966	0.000622813	0.793157
GNAL	0	1.78935e-21	2.67489e-107	4.61555e-13	0.0263919	0.272024	0.81242	0.00303428	0.024679	0.00357285	0.00159047	0.793157
PRPF6	0	1.75365e-21	2.64799e-107	4.45717e-13	0.0264577	0.271917	0.805441	0.00288757	0.0247565	-0.00247352	0.00110169	0.793157
ASGR2	0	1.52952e-21	2.96752e-107	4.66833e-13	0.0264254	0.274891	0.804153	0.00281705	0.0247842	-0.00377101	0.00167991	0.793157
SPSB3	0	1.8696e-21	2.59251e-107	4.04017e-13	0.0264515	0.274971	0.80222	0.00284154	0.0248528	0.00172477	0.000768715	0.793157
TMEM11	0	1.58339e-21	2.80291e-107	4.76317e-13	0.025903	0.27096	0.804769	0.00303569	0.0248615	0.00611779	0.00272681	0.793157
SGO2	0	1.76185e-21	2.9578e-107	4.61397e-13	0.026437	0.276799	0.804641	0.00308777	0.024877	0.00169644	0.000756216	0.793157
MSRB1	0	1.87041e-21	3.08636e-107	4.23692e-13	0.0267733	0.273995	0.806472	0.00296642	0.0249393	0.00333321	0.00148647	0.793779
OR6K6	0	1.73936e-21	2.76057e-107	4.66145e-13	0.0261981	0.273551	0.797415	0.00304612	0.0250185	-0.00186981	0.00083431	0.794938
MEIOC	0	1.96651e-21	2.2982e-107	4.48893e-13	0.0263294	0.276089	0.814513	0.0031317	0.0250919	-0.00181594	0.000810683	0.795425
SBDS	0	1.80918e-21	3.06211e-107	4.45421e-13	0.0262314	0.273176	0.807541	0.00306885	0.0252837	0.00207236	0.000926374	0.795425
CABIN1	0	1.68534e-21	2.78775e-107	4.52443e-13	0.0258129	0.274155	0.800812	0.00254967	0.0253568	-0.000779559	0.000348648	0.795425
LAD1	0	1.68281e-21	2.33347e-107	4.42567e-13	0.0262038	0.273371	0.810157	0.00296061	0.0253762	-0.00202679	0.000906575	0.795425
PIM3	0	1.84848e-21	2.61664e-107	4.85026e-13	0.0268251	0.272181	0.809371	0.00279316	0.0254537	-0.00352849	0.00157912	0.795425
AGFG1	0	1.80302e-21	3.16172e-107	4.61947e-13	0.0255647	0.272973	0.811326	0.0031211	0.0255326	0.00319685	0.00143146	0.795425
ITM2B	0	1.75873e-21	2.71481e-107	4.68672e-13	0.0266203	0.279275	0.804335	0.00283023	0.0255588	0.00412077	0.0018455	0.795425
DHX58	0	1.79951e-21	2.94108e-107	4.15457e-13	0.0271004	0.274967	0.814181	0.00274867	0.025582	-0.00141526	0.00063393	0.795425
MSANTD4	0	1.60493e-21	2.75527e-107	4.35286e-13	0.0266236	0.274618	0.803928	0.00309028	0.0255889	0.00538191	0.0024108	0.795425
GEM	0	1.68226e-21	2.43314e-107	4.33612e-13	0.0260624	0.280392	0.812907	0.00293895	0.0256037	0.00150824	0.000675676	0.795425
LCP1	0	1.59944e-21	2.74165e-107	4.30748e-13	0.0261248	0.274036	0.815474	0.00302627	0.0256485	0.0019239	0.000862147	0.795425
GPR31	0	1.7265e-21	2.33022e-107	4.66499e-13	0.0258401	0.269412	0.801788	0.00293335	0.0256496	-0.00327396	0.00146716	0.795425
SAMD11	0	1.61614e-21	2.37651e-107	4.40759e-13	0.0266743	0.276583	0.799746	0.00282507	0.0257652	0.00120422	0.000540068	0.795425
ZMAT2	0	1.77823e-21	2.45004e-107	4.99423e-13	0.0268714	0.275548	0.809563	0.00296578	0.0258132	-0.00873239	0.00391757	0.795425
TSTD1	0	1.69809e-21	3.89125e-107	4.69555e-13	0.0265918	0.273151	0.804844	0.00281199	0.0258277	-0.00472206	0.00211864	0.795425
GID4	0	1.65527e-21	2.65656e-107	4.61189e-13	0.0259543	0.274399	0.812376	0.00296871	0.0258549	-0.00647688	0.00290651	0.795425
IFT43	0	1.70174e-21	2.40467e-107	4.5004e-13	0.0260138	0.268461	0.808437	0.00300372	0.0258932	0.00307552	0.0013805	0.795425
CINP	0	1.71787e-21	3.16503e-107	4.21612e-13	0.0258633	0.275152	0.807284	0.00303116	0.0259353	-0.00390859	0.00175493	0.795425
GUCD1	0	1.67191e-21	2.81902e-107	4.28311e-13	0.0266994	0.274807	0.811357	0.00301717	0.026012	0.00331996	0.00149141	0.795425
ITGAL	0	1.64477e-21	2.99792e-107	4.35807e-13	0.0260987	0.275939	0.803571	0.00296465	0.0260502	-0.00303536	0.00136391	0.795425
SCRIB	0	1.66493e-21	3.184e-107	4.7339e-13	0.0266938	0.274817	0.807837	0.00306246	0.0260683	0.00105367	0.000473515	0.795425
ZNF330	0	1.68793e-21	2.02728e-107	4.26977e-13	0.0265572	0.274726	0.801556	0.00284547	0.0261307	-0.00262503	0.00118017	0.795425
ANKRD1	0	1.77641e-21	2.53573e-107	4.68019e-13	0.0267654	0.275493	0.805337	0.0028986	0.0261928	0.00214657	0.00096546	0.795425
ALS2CR12	0	1.55346e-21	2.95724e-107	4.49215e-13	0.0256124	0.27679	0.803571	0.00304098	0.0262492	-0.00257091	0.00115675	0.795425
ADA2	0	1.75743e-21	2.77676e-107	4.2531e-13	0.0265115	0.278217	0.805367	0.00305558	0.0263182	0.00278221	0.0012524	0.795425
DUSP12	0	1.74445e-21	3.03051e-107	4.63139e-13	0.0264834	0.273811	0.812581	0.00312783	0.0264213	0.00145316	0.00065458	0.795425
PPP6R3	0	1.80826e-21	2.92819e-107	4.49072e-13	0.0266552	0.276617	0.802552	0.00287814	0.0264496	0.00168449	0.000758928	0.795425
ZNF229	0	1.70901e-21	2.20237e-107	4.77422e-13	0.026554	0.275413	0.810434	0.00284784	0.0264512	0.001555	0.000700595	0.795425
SLC46A2	0	1.83402e-21	2.57105e-107	4.45746e-13	0.0264195	0.275003	0.80537	0.00305687	0.0265013	0.00135421	0.000610334	0.795425
ZNF446	0	1.74495e-21	3.35891e-107	4.49421e-13	0.0264382	0.272969	0.809508	0.00317812	0.0265062	0.00201101	0.000906375	0.795425
RSG1	0	1.84661e-21	2.51122e-107	4.29723e-13	0.026399	0.275978	0.799376	0.0029612	0.026534	-0.00201912	0.0009102	0.795425
APLF	0	1.81447e-21	2.81854e-107	4.31261e-13	0.0261691	0.275588	0.813788	0.00300042	0.0265619	0.00216335	0.000975398	0.795425
B4GALT3	0	1.71231e-21	3.34127e-107	4.11168e-13	0.0264328	0.277046	0.808814	0.00292902	0.0266489	-0.00195704	0.000882885	0.795425
ARFRP1	0	1.68829e-21	3.0503e-107	4.17944e-13	0.0266445	0.274013	0.814392	0.00301871	0.0266668	0.00414668	0.00187092	0.795425
EFNA5	0	1.83735e-21	2.73985e-107	4.54862e-13	0.0264121	0.271648	0.807147	0.0029893	0.0266706	-0.00476401	0.00214951	0.795425
TOP1	0	1.86258e-21	2.88248e-107	4.47024e-13	0.0264238	0.27181	0.802728	0.00289562	0.0266948	-0.00508611	0.0022952	0.795425
GPRC6A	0	1.83127e-21	2.77514e-107	4.50507e-13	0.0262188	0.272281	0.800809	0.00274626	0.0266984	-0.00115935	0.000523191	0.795425
PHAX	0	1.75885e-21	2.69184e-107	4.42263e-13	0.0262081	0.275815	0.802853	0.00293354	0.0267049	-0.00252559	0.00113979	0.795425
TPST2	0	1.77703e-21	2.97382e-107	4.02975e-13	0.0264724	0.273214	0.810039	0.0030168	0.0267056	-0.0017829	0.000804624	0.795425
KIAA1143	0	1.86964e-21	2.11859e-107	4.54736e-13	0.0262101	0.275012	0.806402	0.00291067	0.026901	-0.00191814	0.000866768	0.797837
ESRRB	0	1.99844e-21	2.65677e-107	4.50347e-13	0.0260745	0.277297	0.816115	0.00307364	0.0269477	-0.00286653	0.00129573	0.797837
CCR2	0	1.75603e-21	2.79808e-107	4.4353e-13	0.0270072	0.279902	0.808854	0.00305677	0.0270477	-0.0030697	0.00138847	0.797837
TTLL10	0	1.51549e-21	2.99714e-107	4.55022e-13	0.0273303	0.274289	0.810839	0.00295256	0.027054	0.00160701	0.000726904	0.797837
BBS5	0	1.58126e-21	2.47545e-107	4.05166e-13	0.0265439	0.273111	0.812473	0.00274653	0.0270774	-0.000987335	0.000446673	0.797837
IZUMO2	0	1.7547e-21	2.79064e-107	4.56926e-13	0.0259532	0.278337	0.806153	0.00297674	0.0270849	0.00158863	0.000718735	0.797837
ARL5B	0	1.83587e-21	2.92313e-107	4.65812e-13	0.0263114	0.276472	0.805726	0.00288556	0.0273004	0.00724803	0.00328378	0.797837
TMEM71	0	1.74902e-21	3.5089e-107	4.69315e-13	0.0263365	0.274115	0.817614	0.00283061	0.027304	-0.00192045	0.000870098	0.797837
RPL39L	0	1.80728e-21	2.56894e-107	5.06963e-13	0.0270483	0.279514	0.808588	0.00295066	0.0273409	0.00561997	0.00254685	0.797837
EFCAB13	0	1.55001e-21	2.27213e-107	4.52355e-13	0.025982	0.272133	0.805445	0.00331987	0.0273979	0.00281592	0.00127658	0.797837
CDC42EP1	0	1.91502e-21	3.14194e-107	4.26125e-13	0.0262893	0.274548	0.802053	0.0029051	0.0274235	-0.0019396	0.000879455	0.797837
SLC22A7	0	1.87967e-21	2.80793e-107	4.04382e-13	0.025773	0.272395	0.80531	0.00293084	0.0274324	0.0016601	0.000752765	0.797837
CORO1C	0	1.86936e-21	2.47127e-107	4.59301e-13	0.0269597	0.274322	0.816795	0.00289898	0.0274763	-0.00380102	0.00172405	0.797837
SYNE3	0	1.79361e-21	2.29799e-107	4.17936e-13	0.0265246	0.276733	0.806888	0.00310169	0.0274814	-0.00168207	0.000762968	0.797837
IRF4	0	1.84963e-21	2.95508e-107	4.76175e-13	0.0260619	0.275199	0.808721	0.00295528	0.02763	-0.00248872	0.00112994	0.797837
DPM3	0	1.54626e-21	2.6197e-107	4.60547e-13	0.026474	0.275362	0.808407	0.00303152	0.0276576	0.00583962	0.0026518	0.797837
WBP1	0	1.82062e-21	3.22494e-107	4.40561e-13	0.0268328	0.272633	0.808426	0.00286317	0.0276744	0.00372176	0.00169026	0.797837
PHC3	0	1.65406e-21	2.25954e-107	4.11576e-13	0.02626	0.278338	0.807622	0.00279849	0.0277191	-0.00112485	0.000511003	0.797837
GRHL1	0	1.78304e-21	2.64459e-107	4.33661e-13	0.0262275	0.275231	0.813101	0.00296656	0.0277697	-0.00224866	0.00102186	0.797837
DDX10	0	1.65885e-21	3.1619e-107	4.35338e-13	0.0261099	0.27562	0.807692	0.00277437	0.0278311	0.00105051	0.000477572	0.797837
SLC16A7	0	1.60586e-21	2.9002e-107	4.61712e-13	0.0259514	0.27416	0.809323	0.00302129	0.0278894	0.00199072	0.00090534	0.797837
SMUG1	0	1.69658e-21	2.99348e-107	4.53829e-13	0.0269228	0.272862	0.806471	0.00287298	0.027998	-0.00218435	0.00099409	0.797837
NFIA	0	1.80797e-21	2.8017e-107	4.82201e-13	0.0267054	0.272771	0.812638	0.00300546	0.0280545	0.00354001	0.00161163	0.797837
VSNL1	0	1.82549e-21	2.85767e-107	4.68285e-13	0.0261603	0.274164	0.805749	0.00297723	0.0280682	-0.0103348	0.00470542	0.797837
POM121L12	0	1.7013e-21	2.68738e-107	4.65182e-13	0.0258069	0.27624	0.809996	0.00307551	0.0280721	-0.00278808	0.00126944	0.797837
TJP1	0	1.656e-21	2.88666e-107	4.98894e-13	0.0269768	0.272581	0.809205	0.00313483	0.0280951	0.00103896	0.000473118	0.797837
DNAH1	0	1.77311e-21	2.72887e-107	4.11697e-13	0.0269055	0.274842	0.805116	0.00280267	0.0281191	0.000452953	0.000206296	0.797837
SPP1	0	1.68741e-21	3.20297e-107	4.39179e-13	0.0264186	0.282575	0.810351	0.00307974	0.0281364	-0.00180255	0.000821058	0.797837
ST3GAL6	0	1.84233e-21	2.79749e-107	4.62945e-13	0.0265527	0.270176	0.811275	0.00290649	0.0281611	-0.00304442	0.00138694	0.797837
GPAM	0	1.79596e-21	2.73467e-107	4.53876e-13	0.0262402	0.275102	0.810053	0.00310149	0.0281967	-0.00231594	0.00105531	0.797837
MYBL2	0	1.53e-21	2.89686e-107	4.778e-13	0.0262527	0.276347	0.798959	0.00294579	0.0282198	-0.00273313	0.00124559	0.797837
FOXRED2	0	1.88549e-21	2.69407e-107	4.07151e-13	0.0266567	0.27537	0.810815	0.00305352	0.0282575	0.00145677	0.000664067	0.797837
UBXN1	0	1.62412e-21	2.79069e-107	4.39052e-13	0.0259734	0.27659	0.806171	0.00277128	0.0282796	-0.00203558	0.000928045	0.797837
UBA2	0	1.62805e-21	2.99748e-107	4.1626e-13	0.0255655	0.277944	0.805279	0.00296094	0.028362	-0.00246319	0.00112358	0.797837
SOGA1	0	1.82129e-21	3.27656e-107	4.56126e-13	0.0261786	0.275586	0.801421	0.00299799	0.02841	0.00103788	0.000473574	0.797837
ACSS3	0	1.72557e-21	2.90292e-107	4.49229e-13	0.0267642	0.275202	0.816253	0.00298295	0.0284361	-0.00134525	0.000613924	0.797837
GPR155	0	1.67537e-21	2.74332e-107	4.52104e-13	0.0263043	0.278658	0.801108	0.00292129	0.0284379	0.00188356	0.000859595	0.797837
MYO5C	0	1.72346e-21	3.24833e-107	4.6262e-13	0.0259933	0.278007	0.813188	0.00289381	0.0284876	0.000982202	0.000448386	0.797837
KRTAP27-1	0	1.67718e-21	2.77569e-107	4.49693e-13	0.0262218	0.276186	0.805166	0.00312387	0.0284877	0.00223468	0.00102016	0.797837
FSBP	0	1.76942e-21	3.26781e-107	4.39916e-13	0.025702	0.27248	0.801708	0.00292809	0.0285065	0.00388672	0.00177454	0.797837
RAB11B	0	1.63559e-21	3.3109e-107	4.34873e-13	0.0266164	0.271588	0.80083	0.00296719	0.0286064	0.00562785	0.0025711	0.799429
WDR81	0	1.6186e-21	3.59248e-107	4.45893e-13	0.0264868	0.278904	0.814323	0.0030388	0.0286729	0.000837861	0.000382939	0.800083
UNC13B	0	1.87497e-21	2.98385e-107	4.55343e-13	0.0264215	0.274591	0.804011	0.00305744	0.0289959	-0.000810937	0.000371382	0.802185
CSNK2A3	0	1.72407e-21	2.59996e-107	4.18322e-13	0.0261483	0.276763	0.813734	0.00306059	0.0291663	-0.00192094	0.00088066	0.802185
TAS2R50	0	1.85516e-21	2.381e-107	4.45703e-13	0.0257551	0.273351	0.804621	0.00291231	0.0291708	-0.00618478	0.0028355	0.802185
SIGLEC10	0	1.80407e-21	2.41159e-107	4.44037e-13	0.0274363	0.274343	0.810209	0.00310002	0.0291949	-0.00170538	0.000781972	0.802185
ITIH3	0	1.75643e-21	2.9214e-107	4.29679e-13	0.0260411	0.271287	0.801183	0.00300829	0.0292318	0.00135387	0.000620934	0.802185
IRX2	0	1.70897e-21	2.98316e-107	4.41945e-13	0.0265684	0.272889	0.808895	0.00305534	0.0292601	-0.00292377	0.00134119	0.802185
TSPAN12	0	1.86702e-21	2.78199e-107	4.3274e-13	0.0270186	0.272216	0.813247	0.00309071	0.0292621	0.00305356	0.00140074	0.802185
SCAF1	0	1.71583e-21	2.86004e-107	4.33322e-13	0.0260266	0.277594	0.812137	0.00298755	0.0292816	-0.00128099	0.00058769	0.802185
CMTR2	0	1.59016e-21	2.57754e-107	4.29997e-13	0.0261409	0.274492	0.803033	0.00277568	0.0293538	-0.00237456	0.00108989	0.802185
FAM214B	0	1.82599e-21	3.45597e-107	4.53815e-13	0.0268314	0.276868	0.806308	0.00293146	0.0295614	-0.00164803	0.000757388	0.802185
CSNK1G2	0	1.79029e-21	2.9874e-107	4.64424e-13	0.0260455	0.279011	0.80001	0.00285975	0.0295832	-0.00238223	0.00109495	0.802185
DNMT3A	0	1.66365e-21	1.11348e-107	4.20295e-13	0.0265609	0.271404	0.809036	0.00299828	0.0296235	0.00153087	0.000703813	0.802185
THTPA	0	1.77279e-21	2.26901e-107	4.46004e-13	0.0261598	0.269426	0.801311	0.00305597	0.0297472	-0.00314619	0.00144755	0.802185
USP3	0	1.72024e-21	2.88852e-107	4.57874e-13	0.0260345	0.273836	0.805499	0.00291564	0.0297564	-0.00260578	0.00119898	0.802185
PXN	0	1.90293e-21	2.5747e-107	4.66958e-13	0.0259862	0.273082	0.809845	0.0028523	0.0297912	-0.00121608	0.000559666	0.802185
PCDHGA5	0	1.71845e-21	2.54614e-107	4.44517e-13	0.0258197	0.275913	0.809258	0.00298643	0.0298495	-0.00189071	0.000870452	0.802185
PROC	0	1.73522e-21	2.68658e-107	4.49305e-13	0.0270938	0.27431	0.811188	0.00309035	0.0298503	0.00301548	0.00138829	0.802185
PDZD9	0	1.83186e-21	2.11773e-107	4.50257e-13	0.0263933	0.274254	0.810134	0.00292057	0.0298531	0.00416877	0.00191928	0.802185
FAM19A4	0	1.84746e-21	2.54917e-107	4.50864e-13	0.0259952	0.275739	0.807101	0.00308555	0.0298553	0.00256237	0.00117972	0.802185
UPP1	0	1.7903e-21	3.06104e-107	4.52151e-13	0.0265183	0.273416	0.813457	0.00283758	0.0299275	-0.00208904	0.000962219	0.802185
ALDOA	0	1.73421e-21	2.39623e-107	4.57292e-13	0.0265493	0.275121	0.814596	0.00292176	0.0299473	0.00263689	0.0012147	0.802185
OR2B3	0	1.8461e-21	2.49665e-107	4.49958e-13	0.0259916	0.274488	0.816113	0.00297185	0.0300141	0.00421123	0.00194073	0.802185
C4orf47	0	1.77317e-21	2.21021e-107	4.71452e-13	0.0266661	0.272813	0.804189	0.00310147	0.0300603	0.00279652	0.00128912	0.802185
HIST1H2BM	0	1.6596e-21	3.30096e-107	4.29333e-13	0.0271676	0.278294	0.812475	0.00297588	0.0300957	0.0069461	0.00320266	0.802185
CENPH	0	1.82518e-21	2.51934e-107	4.42934e-13	0.0257583	0.273621	0.800526	0.00284192	0.0301184	-0.00460376	0.00212297	0.802185
AMMECR1	0	3.32759e-21	3.55837e-107	4.9882e-13	0.0268169	0.275749	0.805844	0.00289696	0.030126	-0.00536147	0.00247249	0.802185
THAP12	0	1.57965e-21	2.08401e-107	4.70733e-13	0.0268752	0.278797	0.812312	0.00289249	0.0301319	0.00219942	0.00101432	0.802185
SPDYA	0	1.89137e-21	2.31994e-107	4.56979e-13	0.0264227	0.27731	0.809981	0.00279702	0.0303002	-0.00651927	0.00300959	0.802185
PUS1	0	1.83756e-21	2.93905e-107	4.66415e-13	0.0274767	0.280008	0.808679	0.00302388	0.0303264	0.00302933	0.0013987	0.802185
MTOR	0	1.71637e-21	3.11729e-107	4.51277e-13	0.0252029	0.275607	0.803226	0.00301127	0.0303632	0.00135685	0.000626624	0.802185
GMNN	0	1.79763e-21	3.17805e-107	4.45208e-13	0.026337	0.276693	0.808443	0.0029595	0.030376	0.00662592	0.00306023	0.802185
PRLH	0	1.83404e-21	2.39664e-107	4.11539e-13	0.0269655	0.275407	0.813344	0.0030792	0.0304	0.0031612	0.00146023	0.802185
CFAP97	0	1.73054e-21	3.7184e-107	4.52271e-13	0.0262398	0.26973	0.811555	0.00288871	0.0304448	0.00162634	0.000751447	0.802185
LOXL3	0	1.70172e-21	2.62335e-107	4.59883e-13	0.0265995	0.273098	0.813159	0.00308064	0.0304815	0.00150194	0.000694125	0.802185
KRTAP4-12	0	1.78392e-21	3.10385e-107	4.14398e-13	0.0262825	0.271494	0.806932	0.00295053	0.030525	-0.00368479	0.00170337	0.802185
ISLR	0	1.68326e-21	2.53269e-107	4.53913e-13	0.0263935	0.274433	0.813493	0.00266893	0.0305312	0.00184711	0.0008539	0.802185
ATP1A2	0	1.73671e-21	3.33312e-107	4.9756e-13	0.0263563	0.276916	0.807942	0.00285482	0.0305527	0.00203205	0.000939516	0.802185
PDE6H	0	1.76438e-21	3.11697e-107	4.38204e-13	0.0259042	0.275199	0.809632	0.00300346	0.0305613	-0.00489705	0.00226426	0.802185
C8orf76	0	1.84806e-21	2.65424e-107	4.60965e-13	0.0261682	0.274869	0.807167	0.00307826	0.0306669	0.00542354	0.00250929	0.802185
MITF	0	1.89297e-21	2.92374e-107	4.24405e-13	0.026734	0.273463	0.816169	0.00300224	0.0307303	-0.00144391	0.0006683	0.802185
PCDHB9	0	1.75756e-21	2.27743e-107	4.05088e-13	0.0267846	0.273501	0.811793	0.00282498	0.0307752	0.00306923	0.00142095	0.802185
ULK1	0	1.65189e-21	2.7729e-107	4.60364e-13	0.0263016	0.276477	0.805422	0.00289529	0.0307857	-0.000918249	0.000425144	0.802185
ASB17	0	1.65492e-21	2.95243e-107	4.54946e-13	0.0261469	0.272157	0.807246	0.00293728	0.030815	-0.00362315	0.00167779	0.802185
GPANK1	0	1.64849e-21	2.188e-107	4.78589e-13	0.0266779	0.273606	0.815026	0.00300635	0.0308768	0.00138754	0.000642774	0.802185
COL4A3	0	1.71845e-21	3.15806e-107	4.70197e-13	0.0252121	0.276158	0.808337	0.00285165	0.0309112	-0.00118242	0.000547866	0.802185
CTBP2	0	1.65208e-21	2.5691e-107	4.54639e-13	0.02609	0.275336	0.812908	0.00295958	0.0309304	-0.00135554	0.000628148	0.802185
NEDD4L	0	1.81773e-21	3.0191e-107	4.57384e-13	0.0264804	0.274251	0.803905	0.00311064	0.030953	0.00150231	0.000696257	0.802185
OR2T27	0	1.81735e-21	2.83044e-107	4.35301e-13	0.0274406	0.273512	0.818437	0.00302917	0.0310629	-0.00220594	0.00102303	0.802185
COX5A	0	1.77369e-21	2.66378e-107	4.31142e-13	0.0268754	0.278605	0.804053	0.00297105	0.0310694	0.00293974	0.00136339	0.802185
THUMPD1	0	1.84084e-21	3.70314e-107	5.09323e-13	0.0267383	0.273773	0.808565	0.00287923	0.0311247	0.00288824	0.00133994	0.802185
AKIRIN2	0	1.75117e-21	2.6477e-107	4.69728e-13	0.026822	0.270445	0.807231	0.00293717	0.0311557	0.00654981	0.00303922	0.802185
HTRA3	0	1.75792e-21	2.84648e-107	4.59818e-13	0.0267344	0.274006	0.799729	0.00289118	0.0311658	0.00089217	0.000414006	0.802185
LCE1F	0	1.77447e-21	2.86654e-107	4.73326e-13	0.0261573	0.277829	0.813755	0.00293693	0.0311798	-0.0109988	0.00510433	0.802185
STIM1	0	1.64444e-21	2.35979e-107	4.88956e-13	0.0266271	0.270414	0.807772	0.00291611	0.0311838	-0.00166946	0.000774784	0.802185
CYCS	0	1.53927e-21	2.60718e-107	4.48363e-13	0.0260561	0.275005	0.810801	0.00298893	0.0311855	0.0137406	0.00637699	0.802185
KDM4D	0	1.93059e-21	2.78138e-107	4.62932e-13	0.0262063	0.274997	0.809866	0.00295854	0.0312009	0.00320242	0.00148637	0.802185
SFTPA2	0	1.77382e-21	2.90468e-107	4.30201e-13	0.0262806	0.276763	0.807952	0.00289722	0.0313309	0.00342767	0.00159214	0.802185
FNDC3A	0	1.63864e-21	2.90735e-107	4.50145e-13	0.0263585	0.272817	0.799756	0.00285361	0.0314903	-0.00190993	0.00088799	0.802185
SIX3	0	1.83037e-21	2.73648e-107	4.47165e-13	0.0262576	0.274995	0.803833	0.00303867	0.0315707	-0.00379211	0.00176392	0.802185
MRPL32	0	1.75397e-21	2.95583e-107	4.39068e-13	0.0265444	0.275501	0.813563	0.00303528	0.0316073	-0.00080617	0.000375074	0.802185
FN1	0	1.89317e-21	2.91783e-107	4.69519e-13	0.0270771	0.274424	0.813816	0.00293349	0.0317664	-0.000585728	0.000272767	0.802185
TSPYL1	0	1.75093e-21	2.8667e-107	4.58559e-13	0.0268979	0.275523	0.811427	0.00296707	0.0318206	0.00363643	0.00169398	0.802185
LPAR1	0	1.76241e-21	3.40619e-107	4.65907e-13	0.0265629	0.276175	0.805576	0.00312861	0.0318359	0.00484256	0.00225604	0.802185
NR2C2AP	0	1.65682e-21	2.48653e-107	4.47837e-13	0.0256458	0.278771	0.804977	0.00295059	0.031868	-0.00819424	0.00381823	0.802185
MID1IP1	0	3.17287e-21	2.42165e-107	3.93811e-13	0.0261896	0.274086	0.80983	0.00283071	0.0319109	-0.00231246	0.00107779	0.802185
C12orf60	0	1.83641e-21	3.0393e-107	4.47217e-13	0.0257192	0.270912	0.802821	0.00291235	0.0319599	-0.00295486	0.0013776	0.802185
ATP5L	0	1.71054e-21	2.48051e-107	4.608e-13	0.0267608	0.274981	0.806459	0.00301998	0.0319628	0.00839855	0.0039156	0.802185
INPP5D	0	1.81562e-21	3.21142e-107	4.8521e-13	0.0268282	0.275156	0.807384	0.0027836	0.032052	-0.00193848	0.000904232	0.802185
HIST1H3F	0	1.78524e-21	2.97261e-107	4.63928e-13	0.0262012	0.270802	0.8167	0.00302004	0.0320571	0.00717533	0.00334714	0.802185
SPTLC3	0	1.90457e-21	2.87462e-107	4.43609e-13	0.0261158	0.275646	0.805302	0.00305154	0.0321714	0.00220862	0.00103096	0.802185
ZFC3H1	0	1.83837e-21	3.14034e-107	4.61854e-13	0.0251753	0.278399	0.804082	0.00307089	0.0321866	0.00113279	0.00052882	0.802185
ESM1	0	1.66422e-21	3.26913e-107	4.42803e-13	0.0264824	0.274433	0.801727	0.00300542	0.0322268	0.00752869	0.00351544	0.802185
TMEM143	0	1.73046e-21	2.99549e-107	4.24153e-13	0.0262717	0.275432	0.807023	0.00294946	0.0322314	0.00174711	0.000815814	0.802185
SNTG2	0	1.61879e-21	2.38789e-107	4.25437e-13	0.0260975	0.273224	0.817098	0.0029655	0.03225	-0.00154758	0.000722723	0.802185
FABP3	0	1.74695e-21	2.74174e-107	4.60783e-13	0.0262789	0.273874	0.800902	0.00299995	0.0323933	0.00493474	0.00230645	0.802185
RPL28	0	1.58197e-21	2.93233e-107	4.55987e-13	0.0267448	0.271826	0.804597	0.00301994	0.032453	-0.00371058	0.00173488	0.802185
PAPOLB	0	1.65203e-21	2.69244e-107	4.47316e-13	0.0263338	0.269418	0.814512	0.00314258	0.0325885	0.00194152	0.000908466	0.802185
FFAR1	0	1.76951e-21	2.94715e-107	4.29652e-13	0.0260397	0.276302	0.81354	0.00300093	0.032628	0.00316504	0.00148131	0.802185
MFSD3	0	1.71876e-21	2.724e-107	4.52828e-13	0.0259383	0.274914	0.806568	0.00305218	0.032644	-0.0017954	0.000840364	0.802185
EOMES	0	1.88278e-21	2.5251e-107	4.74593e-13	0.0263346	0.27737	0.809354	0.00303767	0.0326586	-0.00211904	0.000991931	0.802185
CTSA	0	1.75911e-21	2.79636e-107	4.76107e-13	0.0266446	0.275287	0.81026	0.00301659	0.0327211	0.00234259	0.00109697	0.802185
MORC2	0	1.7583e-21	2.7978e-107	4.34912e-13	0.0264488	0.275914	0.812966	0.0028891	0.0327392	-0.00216502	0.00101393	0.802185
HIST1H3C	0	1.73999e-21	2.88256e-107	4.35638e-13	0.0264069	0.270557	0.811204	0.00291046	0.0327436	0.00625555	0.00292968	0.802185
MDC1	0	1.91247e-21	2.98533e-107	4.8419e-13	0.0262905	0.27745	0.805529	0.00291742	0.0329806	-0.0012618	0.000591745	0.802185
OR8G5	0	1.81362e-21	2.57518e-107	4.35742e-13	0.0265622	0.276961	0.809037	0.00287436	0.0330412	-0.00574202	0.00269376	0.802185
FOXI3	0	1.69976e-21	2.76943e-107	4.39275e-13	0.0259644	0.269493	0.807225	0.00295909	0.0330583	0.00883607	0.00414567	0.802185
MUC13	0	1.59835e-21	2.38908e-107	4.69033e-13	0.0261183	0.275477	0.802693	0.00299931	0.0330615	-0.00294341	0.00138101	0.802185
VPS4B	0	1.90175e-21	3.33911e-107	4.53114e-13	0.0261552	0.273535	0.808905	0.00339326	0.0330683	-0.00127693	0.000599142	0.802185
PRAMEF4	0	1.85427e-21	2.68876e-107	4.6171e-13	0.0264497	0.273692	0.806666	0.00289306	0.0330715	0.00250288	0.00117438	0.802185
PHYKPL	0	1.63565e-21	3.14795e-107	4.61761e-13	0.0271275	0.276424	0.810353	0.00303855	0.0330759	-0.00114991	0.000539565	0.802185
HSBP1L1	0	1.70955e-21	2.88911e-107	4.2527e-13	0.0267944	0.277629	0.808523	0.00279847	0.0330984	-0.00535453	0.00251279	0.802185
UBIAD1	0	1.67621e-21	2.47361e-107	4.62267e-13	0.0272102	0.274094	0.813053	0.00292006	0.033152	-0.00526922	0.00247351	0.802185
ZDHHC19	0	1.74455e-21	2.77909e-107	4.19404e-13	0.0255809	0.278086	0.804336	0.00280517	0.0331544	-0.00185221	0.000869488	0.802185
ZNF124	0	1.58653e-21	2.21062e-107	4.56053e-13	0.0264674	0.276285	0.814212	0.00276935	0.0331753	-0.00161845	0.000759846	0.802185
C2CD4B	0	1.86383e-21	2.86958e-107	4.62777e-13	0.025636	0.269886	0.805378	0.0028227	0.0331767	-0.00148802	0.000698613	0.802185
OSBPL9	0	1.76465e-21	2.61121e-107	4.68078e-13	0.0260876	0.271078	0.809162	0.00283341	0.0331905	-0.00165097	0.000775181	0.802185
FBLN2	0	1.64315e-21	2.58628e-107	4.68934e-13	0.026356	0.270989	0.81605	0.00305183	0.0331927	0.00106229	0.000498783	0.802185
DAB2IP	0	1.75021e-21	2.08693e-107	4.56508e-13	0.0265432	0.274851	0.805973	0.00289202	0.0331999	0.00118086	0.000554479	0.802185
PAPLN	0	1.77342e-21	2.80229e-107	4.59521e-13	0.0268868	0.277106	0.802767	0.00303387	0.033224	0.000674479	0.000316748	0.802185
IMMP2L	0	1.61808e-21	2.79978e-107	4.56111e-13	0.0269093	0.273846	0.808231	0.00291463	0.0332547	-0.00365963	0.00171893	0.802185
OSTN	0	1.75005e-21	2.60327e-107	4.30945e-13	0.0264389	0.275376	0.812641	0.00297776	0.0332798	0.00520133	0.00244341	0.802185
SDC3	0	1.665e-21	2.53043e-107	4.47646e-13	0.026251	0.275219	0.818752	0.00286994	0.0333186	-0.00297277	0.00139682	0.802185
ZNF705B	0	1.68721e-21	3.24021e-107	4.49393e-13	0.0263402	0.276369	0.807807	0.00290006	0.0333225	0.00891347	0.00418827	0.802185
ATP2B4	0	1.62318e-21	2.38043e-107	4.49862e-13	0.0262862	0.269712	0.808225	0.00312023	0.0333911	0.00140329	0.000659636	0.802185
APOBEC3H	0	1.60946e-21	2.58169e-107	4.45142e-13	0.0267976	0.274367	0.80999	0.00276517	0.0334554	0.00519386	0.00244234	0.802185
DGKE	0	1.70314e-21	2.93577e-107	4.05187e-13	0.0263765	0.27673	0.803986	0.002942	0.0334606	0.00125081	0.000588192	0.802185
TMEM109	0	1.68053e-21	2.48885e-107	4.35122e-13	0.0262162	0.278585	0.813406	0.00315076	0.0334808	-0.00232985	0.00109574	0.802185
RGMB	0	1.6627e-21	3.40607e-107	4.39261e-13	0.0256434	0.272383	0.808806	0.00302761	0.0335648	-0.00208168	0.000979484	0.802185
AFG1L	0	1.67187e-21	2.36056e-107	4.2203e-13	0.0258904	0.2743	0.807168	0.00295864	0.0335659	0.00184162	0.000866537	0.802185
SHROOM3	0	1.6176e-21	3.74398e-107	4.39798e-13	0.0268574	0.269637	0.801921	0.00311253	0.0336601	0.000953595	0.000448932	0.802185
DKK3	0	1.68095e-21	2.65863e-107	4.48896e-13	0.0260322	0.275724	0.815456	0.00293738	0.0336714	-0.00311538	0.00146675	0.802185
CAND1	0	1.81923e-21	3.22731e-107	4.92149e-13	0.025266	0.277267	0.792332	0.00300544	0.0337081	-0.00234536	0.00110444	0.802185
RTBDN	0	1.7366e-21	3.40732e-107	4.65266e-13	0.025743	0.276495	0.809107	0.002881	0.0338007	-0.00194235	0.000915141	0.802185
SMC3	0	1.86663e-21	2.67365e-107	4.62023e-13	0.0265505	0.274501	0.814371	0.00308075	0.0338077	0.0036623	0.00172556	0.802185
EIF4EBP2	0	1.5762e-21	2.63536e-107	4.70698e-13	0.0261224	0.270308	0.808879	0.00301199	0.0338132	0.00283915	0.00133776	0.802185
UGT2B4	0	1.85989e-21	2.50392e-107	4.38525e-13	0.026318	0.277302	0.810064	0.00304902	0.0338486	0.0021461	0.00101141	0.802185
GIPC1	0	1.68025e-21	2.41249e-107	4.6255e-13	0.0271115	0.278714	0.812121	0.00281746	0.0338542	-0.00241627	0.00113877	0.802185
GNAI2	0	1.85616e-21	3.06148e-107	4.49769e-13	0.0262247	0.276417	0.814129	0.00299952	0.0338571	-0.00322298	0.00151899	0.802185
POLR2H	0	1.76734e-21	2.63048e-107	4.27129e-13	0.0261539	0.273693	0.807147	0.0030742	0.0338927	0.00486846	0.00229497	0.802185
ARRDC2	0	1.64098e-21	3.23095e-107	4.39904e-13	0.0260576	0.275166	0.805408	0.00279684	0.0339682	-0.00122481	0.000577614	0.802947
NPR2	0	1.65959e-21	2.70436e-107	4.56548e-13	0.0267912	0.277433	0.809545	0.00289364	0.0341677	-0.00161358	0.000761801	0.804895
CDNF	0	1.66588e-21	2.7026e-107	4.51796e-13	0.0262744	0.274319	0.808582	0.00306345	0.0341806	0.00310053	0.00146393	0.804895
VPS50	0	1.68875e-21	2.16275e-107	4.50375e-13	0.0264233	0.276958	0.802548	0.00309894	0.0341807	-0.00126881	0.000599074	0.804895
ELMO1	0	1.89539e-21	2.37756e-107	4.35275e-13	0.0262049	0.275743	0.806672	0.00295214	0.0342394	0.00118705	0.000560653	0.805254
BCL2L15	0	1.72602e-21	3.18688e-107	4.47122e-13	0.0269709	0.26907	0.813783	0.00286166	0.0342919	0.00427281	0.00201867	0.80547
MYLIP	0	1.75676e-21	2.70532e-107	4.68789e-13	0.0268313	0.270883	0.814673	0.00319809	0.034367	-0.00221175	0.00104537	0.805841
NAT10	0	1.74785e-21	2.4611e-107	4.32293e-13	0.0266635	0.274034	0.809427	0.00305809	0.0344147	0.0009108	0.000430598	0.805841
RCBTB2	0	1.76136e-21	2.55944e-107	4.33539e-13	0.026319	0.274478	0.809415	0.00287385	0.0344636	0.00143532	0.000678758	0.805841
ALYREF	0	1.71206e-21	2.86206e-107	4.60492e-13	0.0262323	0.273115	0.811472	0.00299445	0.034545	-0.00471144	0.00222903	0.805841
C15orf62	0	1.62577e-21	2.96722e-107	4.70285e-13	0.0256796	0.273967	0.807488	0.0029334	0.0345492	-0.0026928	0.00127402	0.805841
CDC27	0	1.78792e-21	2.67483e-107	4.48028e-13	0.0262357	0.276613	0.806245	0.00290933	0.0345683	-0.0019944	0.000943691	0.805841
BCDIN3D	0	1.49368e-21	2.38311e-107	4.7561e-13	0.026405	0.275081	0.804659	0.00295886	0.0347348	0.00190722	0.000903272	0.8069
TMEM35A	0	1.32061e-21	3.07428e-107	4.53014e-13	0.0272933	0.272181	0.808751	0.00290027	0.0347386	0.0135949	0.00643877	0.8069
TMEM127	0	1.7532e-21	3.03754e-107	4.39191e-13	0.0263275	0.277414	0.809071	0.00299578	0.0347442	0.00312387	0.00147956	0.8069
CTSB	0	1.64863e-21	2.61062e-107	4.66068e-13	0.0263206	0.274947	0.811693	0.00309008	0.0350101	-0.00124232	0.000589264	0.809671
ZNF225	0	1.87041e-21	3.37142e-107	4.36958e-13	0.0265759	0.2746	0.813138	0.003076	0.0350708	0.00161312	0.000765399	0.809671
VCX3B	0	1.42407e-21	2.95639e-107	4.58708e-13	0.0266133	0.2738	0.800458	0.00299244	0.0350831	-0.00851664	0.00404127	0.809671
C10orf120	0	1.6328e-21	2.94852e-107	4.60318e-13	0.0264197	0.272887	0.812809	0.00289303	0.0351202	0.00394146	0.00187066	0.809671
SLC39A9	0	1.78077e-21	3.00285e-107	4.5349e-13	0.0266988	0.278664	0.812279	0.00293558	0.0352073	-0.00292867	0.00139064	0.809671
MRPL13	0	1.77301e-21	3.13841e-107	4.52662e-13	0.0263557	0.275344	0.80145	0.0028514	0.0352075	-0.00152702	0.000725087	0.809671
BPIFA1	0	1.72285e-21	2.62873e-107	4.59286e-13	0.0267148	0.274554	0.806448	0.00298895	0.0353172	0.00590445	0.00280533	0.809671
VCPIP1	0	1.62579e-21	3.15159e-107	4.39906e-13	0.0262774	0.272907	0.805628	0.00287786	0.0353678	-0.00308542	0.00146635	0.809671
SMCP	0	1.68535e-21	3.17447e-107	4.58001e-13	0.0262637	0.271623	0.802999	0.00297266	0.0353793	0.0104495	0.00496647	0.809671
RHOT2	0	1.83671e-21	3.39537e-107	4.42079e-13	0.0261716	0.270832	0.805792	0.00304736	0.0354001	-0.00146633	0.000696999	0.809671
SUPT5H	0	1.69008e-21	2.6434e-107	4.60039e-13	0.0259461	0.275068	0.811136	0.0030738	0.0355245	0.00204771	0.000974009	0.809671
PIGU	0	1.71248e-21	1.92204e-107	4.44516e-13	0.0278659	0.275442	0.815342	0.00316212	0.0355856	0.00157099	0.000747503	0.809671
SHROOM2	0	5.17033e-22	2.66446e-107	4.18201e-13	0.0261087	0.276001	0.808665	0.00284918	0.0356161	0.00117281	0.000558136	0.809671
C1orf109	0	1.75808e-21	3.04463e-107	4.69803e-13	0.02567	0.274738	0.805891	0.00289382	0.0356847	-0.00306816	0.00146066	0.809671
TNFAIP8L3	0	1.67792e-21	2.37182e-107	4.38968e-13	0.0266554	0.274285	0.807777	0.00304419	0.0356879	0.00230537	0.00109754	0.809671
PGLYRP3	0	1.68834e-21	3.73842e-107	4.21383e-13	0.0258784	0.276964	0.800033	0.00279145	0.0357162	0.00234519	0.00111667	0.809671
IFNA14	0	1.75469e-21	2.67651e-107	4.29838e-13	0.0267868	0.275579	0.810462	0.00279794	0.0357194	-0.00366327	0.00174431	0.809671
ZNF426	0	1.62318e-21	2.37227e-107	4.83724e-13	0.0263567	0.274256	0.80475	0.00300357	0.0357525	0.00353586	0.00168395	0.809671
NUP35	0	1.83364e-21	3.18331e-107	4.7212e-13	0.0263716	0.276966	0.811635	0.00297839	0.0357933	0.00262508	0.00125046	0.809671
MPRIP	0	1.6602e-21	3.34925e-107	4.40485e-13	0.0259454	0.277835	0.814509	0.00305961	0.0358075	0.00147658	0.000703424	0.809671
CWF19L1	0	1.70116e-21	2.29504e-107	4.53888e-13	0.0268029	0.272556	0.803957	0.00284009	0.0358127	-0.00254414	0.00121204	0.809671
GLB1L2	0	1.82161e-21	2.93757e-107	4.52145e-13	0.0262106	0.272827	0.814658	0.00290591	0.035923	-0.00213659	0.00101848	0.809671
ACSF2	0	1.62005e-21	2.71711e-107	4.13483e-13	0.0269233	0.276811	0.801501	0.00298273	0.0359963	0.00145951	0.000696001	0.809671
MCCD1	0	1.69917e-21	2.3991e-107	4.39438e-13	0.0266218	0.272648	0.814996	0.00304943	0.0360045	-0.00436442	0.00208137	0.809671
ZHX3	0	1.70413e-21	2.59476e-107	4.36455e-13	0.026984	0.270361	0.810471	0.00290259	0.0360326	-0.00188968	0.000901317	0.809671
RALGPS2	0	1.9073e-21	2.59197e-107	4.29675e-13	0.0259483	0.275889	0.808591	0.00277455	0.0361348	0.00175064	0.000835456	0.809671
PLA2G2A	0	1.66724e-21	2.87379e-107	4.49745e-13	0.0259595	0.279264	0.817192	0.00315901	0.036234	-0.00290271	0.001386	0.809671
NELFA	0	1.63514e-21	2.52217e-107	4.52456e-13	0.0266982	0.273803	0.805292	0.00292765	0.0362389	0.00295069	0.00140895	0.809671
SPANXN2	0	2.56951e-21	2.62002e-107	4.23878e-13	0.0264624	0.278018	0.806801	0.00305513	0.0362624	-0.00898247	0.00428964	0.809671
KIF9	0	1.64799e-21	2.72894e-107	4.61923e-13	0.0268137	0.27032	0.808605	0.00275013	0.0363309	-0.00106425	0.000508427	0.809671
NOL10	0	1.64987e-21	2.82077e-107	4.68955e-13	0.0259506	0.272314	0.804501	0.00296736	0.0363367	-0.00162979	0.000778625	0.809671
ANGPTL5	0	1.5968e-21	3.05038e-107	4.6832e-13	0.0262997	0.269918	0.810198	0.00305908	0.0363489	-0.00234715	0.00112142	0.809671
IER5L	0	1.83508e-21	3.00537e-107	4.4353e-13	0.026161	0.276265	0.805141	0.00304684	0.0363846	0.0042828	0.00204662	0.809671
PLXNA3	0	3.72923e-22	2.84582e-107	4.13154e-13	0.0257534	0.274767	0.809218	0.00286864	0.0363866	0.00101888	0.000486896	0.809671
DEFB114	0	1.72812e-21	3.55206e-107	4.51017e-13	0.0266639	0.277085	0.809975	0.00301042	0.0363995	-0.0171619	0.00820178	0.809671
PARP10	0	1.80386e-21	3.15792e-107	4.85362e-13	0.026261	0.27677	0.809103	0.0033404	0.0365233	-0.00165425	0.000791102	0.809671
PEX7	0	1.8527e-21	2.58608e-107	4.20507e-13	0.0262197	0.275482	0.812599	0.00291263	0.0365272	-0.00113306	0.000541869	0.809671
ADAL	0	1.86565e-21	3.33344e-107	4.56623e-13	0.0268827	0.274349	0.810684	0.00301787	0.0365548	0.00308053	0.00147343	0.809671
STX18	0	1.76868e-21	2.85446e-107	4.3183e-13	0.0263805	0.272692	0.807334	0.0028195	0.0366924	0.00275781	0.00132004	0.809671
CATSPERZ	0	1.65712e-21	2.52794e-107	4.39885e-13	0.0268073	0.27435	0.813097	0.00288051	0.0367129	0.00892425	0.0042721	0.809671
SBF2	0	1.8343e-21	2.80553e-107	4.69915e-13	0.026927	0.273173	0.804822	0.00309089	0.0367764	0.00105744	0.000506376	0.809671
CSE1L	0	1.84759e-21	2.47682e-107	4.68861e-13	0.0266066	0.275807	0.809832	0.00289196	0.0368505	-0.00254059	0.00121709	0.809671
IL2	0	1.64489e-21	2.90248e-107	4.76787e-13	0.0261707	0.2773	0.808968	0.00305008	0.0368663	0.0151011	0.00723487	0.809671
CELSR1	0	1.82308e-21	3.59171e-107	4.19001e-13	0.0263279	0.274605	0.806558	0.00298054	0.036877	-0.00057919	0.000277504	0.809671
RDH12	0	1.92677e-21	3.05218e-107	4.2056e-13	0.0257475	0.274622	0.8034	0.00299369	0.0369327	0.00212699	0.00101939	0.809671
SRGAP1	0	1.69792e-21	2.60715e-107	4.54733e-13	0.0267605	0.273831	0.808196	0.00296692	0.0369807	0.00127532	0.000611371	0.809671
AVPI1	0	1.81602e-21	2.70945e-107	4.49761e-13	0.0265296	0.273979	0.812688	0.00289357	0.0370155	-0.00313801	0.0015046	0.809671
ANGPTL1	0	1.71794e-21	2.12133e-107	4.12241e-13	0.0259703	0.27571	0.812324	0.0029769	0.037033	-0.00245226	0.00117591	0.809671
NOP10	0	1.78344e-21	3.26459e-107	4.30676e-13	0.0263637	0.275364	0.809324	0.00296272	0.0371165	0.00788094	0.00378073	0.809671
ZDHHC20	0	1.65059e-21	3.04291e-107	4.4775e-13	0.0265589	0.276824	0.814656	0.00288833	0.0372618	0.00113444	0.000544644	0.809671
PTPN6	0	1.69399e-21	3.04053e-107	4.46731e-13	0.0264956	0.27529	0.803975	0.002941	0.0372727	-0.00177417	0.000851828	0.809671
HAPLN3	0	1.71661e-21	2.80929e-107	4.178e-13	0.0265371	0.268521	0.80633	0.00291582	0.0373894	-0.000985195	0.000473309	0.809671
RASGRF2	0	1.82496e-21	2.81234e-107	4.49613e-13	0.0271412	0.273901	0.804372	0.00292395	0.0374238	0.00153336	0.000736792	0.809671
ST6GALNAC4	0	1.81875e-21	3.34277e-107	4.31403e-13	0.0263105	0.273691	0.810646	0.00296241	0.037424	0.00267566	0.00128568	0.809671
CCDC85C	0	1.62906e-21	2.86983e-107	4.43901e-13	0.0261923	0.275905	0.805087	0.00294531	0.0374528	0.00297283	0.00142869	0.809671
ZNF182	0	1.01393e-21	2.69927e-107	4.70462e-13	0.0265393	0.268841	0.808391	0.00308285	0.0374777	0.00272367	0.00130912	0.809671
KCNMA1	0	1.71155e-21	2.59034e-107	4.46565e-13	0.026375	0.277027	0.808042	0.00306313	0.0375026	0.00185976	0.000894002	0.809671
RHBDL1	0	1.82018e-21	2.48263e-107	4.31368e-13	0.0261278	0.274902	0.816137	0.00286583	0.0375554	0.00191973	0.000923083	0.809671
MED1	0	1.79921e-21	2.28443e-107	4.3245e-13	0.0268523	0.276103	0.806586	0.00289027	0.0375761	-0.00172177	0.000827987	0.809671
ST8SIA2	0	1.62609e-21	2.87881e-107	4.53218e-13	0.0267715	0.276444	0.811637	0.00295835	0.0377765	0.00310978	0.00149704	0.809671
SLC22A5	0	1.71688e-21	3.10633e-107	4.64005e-13	0.0267724	0.274482	0.805619	0.00285756	0.0377933	-0.000876696	0.000422075	0.809671
THRSP	0	1.9001e-21	3.04705e-107	4.39853e-13	0.026383	0.277108	0.80921	0.00308899	0.0378128	-0.00318402	0.00153307	0.809671
GSTZ1	0	1.77807e-21	2.86288e-107	4.38944e-13	0.0271676	0.276536	0.816127	0.00272032	0.0378187	-0.00207259	0.000997959	0.809671
CREB3L2	0	1.7737e-21	2.50087e-107	4.39001e-13	0.0265196	0.276169	0.807811	0.00290494	0.0378943	-0.00247991	0.00119455	0.809671
ARHGEF33	0	1.7449e-21	2.50194e-107	4.39218e-13	0.0266543	0.28064	0.815276	0.00295306	0.0379302	-0.00145093	0.000699034	0.809671
SLC35D1	0	1.71243e-21	3.54485e-107	4.34193e-13	0.0264146	0.271567	0.80478	0.00293852	0.037946	0.00238841	0.00115079	0.809671
GOT1L1	0	1.79082e-21	2.52974e-107	4.7495e-13	0.0259527	0.275967	0.814092	0.00301718	0.0379518	-0.00342906	0.00165224	0.809671
DSCAML1	0	1.67968e-21	2.39661e-107	4.14738e-13	0.0259283	0.274895	0.807991	0.00289346	0.0380373	-0.000789044	0.000380359	0.809671
MARK2	0	1.72001e-21	3.67915e-107	4.52167e-13	0.0269128	0.276097	0.809453	0.00300261	0.0381287	-0.00236167	0.00113898	0.809671
CLEC4A	0	1.6638e-21	2.19132e-107	4.48494e-13	0.0261657	0.27423	0.808271	0.00285631	0.0381412	-0.00491857	0.00237228	0.809671
HOXA7	0	1.61623e-21	2.56056e-107	4.58416e-13	0.0265199	0.27322	0.809242	0.00307959	0.0382132	0.00317714	0.00153294	0.809671
MAFA	0	1.87873e-21	2.88856e-107	3.9026e-13	0.0259674	0.272002	0.809804	0.00284453	0.038305	0.00281877	0.00136068	0.809671
HSF1	0	1.76777e-21	2.46321e-107	4.08758e-13	0.0262772	0.274407	0.805821	0.00306951	0.0383497	-0.00275687	0.0013311	0.809671
MT1M	0	1.70372e-21	2.6075e-107	4.55358e-13	0.026118	0.274715	0.806955	0.00307977	0.038377	-0.00199657	0.000964144	0.809671
FABP9	0	1.85792e-21	3.03082e-107	4.74559e-13	0.0263024	0.272863	0.815933	0.00274787	0.038407	-0.00301495	0.00145614	0.809671
RASSF4	0	1.65249e-21	2.66399e-107	4.39402e-13	0.0265991	0.271115	0.80579	0.00288593	0.0384298	-0.00178083	0.000860199	0.809671
RBBP8	0	1.55794e-21	3.35395e-107	4.43715e-13	0.0262384	0.273324	0.810749	0.00298003	0.0385048	-0.00140195	0.000677449	0.809671
USF3	0	1.74016e-21	2.96191e-107	4.68048e-13	0.0267786	0.271895	0.804418	0.00290388	0.0385946	0.00126871	0.000613348	0.809671
FAM91A1	0	1.73267e-21	2.47197e-107	4.63342e-13	0.0262216	0.272965	0.80255	0.0027901	0.0386191	-0.00191224	0.000924571	0.809671
DPYD	0	1.7278e-21	3.11031e-107	4.4397e-13	0.0268298	0.276325	0.810825	0.0029818	0.0387275	-0.000854872	0.000413563	0.809671
GOLGA8K	0	1.90816e-21	3.81365e-107	4.82277e-13	0.0261905	0.276558	0.805685	0.0030346	0.0387401	0.044498	0.0215283	0.809671
PTRH2	0	1.56546e-21	2.77337e-107	4.57382e-13	0.0265875	0.276323	0.810431	0.00302977	0.0387583	-0.00492948	0.00238512	0.809671
ADARB2	0	1.7854e-21	3.04888e-107	4.4361e-13	0.0264127	0.274025	0.808284	0.00287127	0.0387714	-0.000935123	0.000452488	0.809671
DOC2B	0	1.8797e-21	2.52954e-107	4.34617e-13	0.0266249	0.276874	0.813245	0.00312116	0.0389201	0.00219785	0.00106431	0.809671
KRTAP2-1	0	1.53995e-21	2.23198e-107	4.77019e-13	0.0268357	0.274201	0.816151	0.00310512	0.0389229	-0.00320563	0.00155235	0.809671
HYOU1	0	1.78153e-21	2.327e-107	4.35109e-13	0.0263843	0.272628	0.809774	0.00325393	0.0390197	-0.00151644	0.000734712	0.809671
DPP9	0	1.65235e-21	2.4174e-107	5.1006e-13	0.0267929	0.276823	0.807333	0.00278089	0.0390496	-0.00108685	0.000526658	0.809671
PTH2	0	1.6299e-21	3.1608e-107	4.50607e-13	0.0262489	0.273369	0.80852	0.00285419	0.0391103	0.00227483	0.00110266	0.809671
SLC5A6	0	1.77856e-21	2.9742e-107	4.60451e-13	0.0258371	0.276395	0.808757	0.0032565	0.0391478	0.00218725	0.00106041	0.809671
PRPF40A	0	1.78547e-21	2.64358e-107	4.38583e-13	0.0261319	0.271936	0.810705	0.00288118	0.0391862	-0.00304878	0.00147838	0.809671
TMEM56	0	1.69445e-21	3.09239e-107	4.34891e-13	0.0262373	0.273941	0.806945	0.00282662	0.0392063	-0.0100993	0.00489773	0.809671
PWP2	0	1.69936e-21	3.15076e-107	4.40559e-13	0.0261459	0.271136	0.809913	0.00307536	0.0392234	0.00601143	0.00291555	0.809671
PIN4	0	1.12254e-21	2.26215e-107	4.87739e-13	0.0263113	0.277396	0.812306	0.0029647	0.0392661	0.00665404	0.00322792	0.809671
OGG1	0	1.8192e-21	2.96668e-107	4.98867e-13	0.0260899	0.275365	0.800562	0.00299659	0.0392821	0.000857761	0.000416139	0.809671
ZNF775	0	1.62239e-21	3.32242e-107	4.44556e-13	0.026667	0.274497	0.809089	0.00297174	0.0392985	0.00246647	0.00119669	0.809671
HSPB11	0	1.77377e-21	3.29977e-107	4.51818e-13	0.0267838	0.276798	0.806565	0.00290547	0.0393891	0.00362676	0.00176046	0.809671
UTP14C	0	1.67391e-21	2.94904e-107	4.57975e-13	0.0260662	0.277905	0.808272	0.00301623	0.0393927	0.00108258	0.000525506	0.809671
LRCH2	0	6.17173e-21	3.23181e-107	4.34764e-13	0.0269987	0.275013	0.805435	0.00277684	0.0395699	-0.00215975	0.00104933	0.809671
PRR4	0	1.66314e-21	3.53934e-107	4.61247e-13	0.0271009	0.275661	0.810245	0.00308685	0.0395879	0.00650225	0.00315944	0.809671
ARHGEF18	0	1.68958e-21	2.19147e-107	4.46196e-13	0.0259699	0.275999	0.809759	0.00300986	0.0396306	-0.000949559	0.000461489	0.809671
RPH3AL	0	1.81418e-21	3.04977e-107	4.56226e-13	0.0258709	0.275575	0.814741	0.00298849	0.0396531	0.00125034	0.00060774	0.809671
PJA1	0	1.16554e-21	2.68126e-107	4.37809e-13	0.0264505	0.274713	0.807601	0.00281064	0.0396763	0.00611395	0.00297209	0.809671
2007-03-01	0	1.76066e-21	3.04977e-107	4.50226e-13	0.0268757	0.272514	0.81071	0.0028582	0.0397015	0.00150835	0.000733326	0.809671
GPR182	0	1.63942e-21	2.72281e-107	4.40024e-13	0.0263391	0.27201	0.810907	0.00288846	0.03971	0.00301178	0.00146432	0.809671
ALS2CL	0	1.67064e-21	3.18078e-107	4.5608e-13	0.0259748	0.271623	0.81177	0.00306265	0.0397295	0.000933116	0.000453725	0.809671
LAMB3	0	1.62989e-21	2.55097e-107	4.5945e-13	0.0258766	0.274957	0.812314	0.0030981	0.0397411	-0.000822085	0.00039976	0.809671
BPIFB3	0	1.61596e-21	2.44536e-107	4.51639e-13	0.0266613	0.276282	0.809745	0.0031197	0.0397436	0.000856313	0.000416409	0.809671
SIRT4	0	1.84196e-21	2.74342e-107	4.52256e-13	0.0268012	0.276254	0.809661	0.00298436	0.039768	0.00093202	0.00045328	0.809671
XAGE3	0	1.97855e-21	2.59224e-107	4.20143e-13	0.0268893	0.274459	0.806937	0.00291537	0.0398505	-0.0185252	0.00901331	0.809671
ARHGEF17	0	1.83421e-21	2.42163e-107	4.43162e-13	0.0260213	0.269399	0.803744	0.00276605	0.0399246	-0.000743824	0.000362038	0.809671
AMOTL1	0	1.76787e-21	2.62115e-107	4.30417e-13	0.0266008	0.276327	0.811392	0.00305721	0.0399897	0.000999798	0.000486786	0.809671
ZC3H14	0	1.89596e-21	2.33699e-107	4.38212e-13	0.0264037	0.276558	0.807704	0.00281962	0.0400614	0.00186144	0.000906634	0.809671
FCRL3	0	1.66306e-21	2.87611e-107	4.62922e-13	0.0261972	0.279304	0.817171	0.00292371	0.0400646	0.0014965	0.000728898	0.809671
CX3CL1	0	1.83318e-21	2.77138e-107	4.40237e-13	0.0261754	0.278524	0.810635	0.00291091	0.0401188	-0.0018242	0.00088875	0.809671
PCF11	0	1.70222e-21	2.9908e-107	4.53115e-13	0.0259966	0.274979	0.802715	0.00301428	0.0401935	0.00134794	0.000656966	0.809671
PER3	0	1.8668e-21	3.24998e-107	4.40896e-13	0.0270659	0.279151	0.806824	0.00329391	0.0402055	0.00106965	0.000521362	0.809671
SNRPD3	0	1.64512e-21	3.00867e-107	4.41739e-13	0.0257087	0.274386	0.803605	0.00297619	0.0402544	-0.0102658	0.00500489	0.809671
RPS25	0	1.71315e-21	2.98087e-107	4.54766e-13	0.0263763	0.273779	0.810708	0.00296087	0.0403039	0.00983509	0.00479611	0.809671
B4GALT4	0	1.88278e-21	2.92629e-107	4.46077e-13	0.0268945	0.275763	0.80883	0.00295336	0.0403305	0.00214846	0.00104784	0.809671
TMEM128	0	1.78206e-21	2.19227e-107	4.70139e-13	0.0267739	0.273686	0.813057	0.00287489	0.0403374	-0.00260822	0.00127212	0.809671
KIAA1456	0	1.8201e-21	2.783e-107	4.68713e-13	0.0266521	0.274874	0.81671	0.00297435	0.040342	-0.00216157	0.0010543	0.809671
KRT8	0	1.67532e-21	3.22894e-107	4.35982e-13	0.0270269	0.278895	0.80117	0.00263639	0.040398	0.00145083	0.000707835	0.809671
FEZF2	0	1.81223e-21	3.06339e-107	4.60298e-13	0.0272165	0.276329	0.814092	0.00293271	0.0404195	0.0035036	0.00170953	0.809671
CD3E	0	1.7372e-21	2.58957e-107	4.08894e-13	0.0262196	0.274813	0.805238	0.00286983	0.0404699	0.00293202	0.00143099	0.809671
OR5T3	0	1.62536e-21	2.52879e-107	4.30086e-13	0.0270075	0.273594	0.804031	0.0028536	0.0405937	0.0024702	0.00120634	0.809671
FAM214A	0	1.687e-21	2.84779e-107	4.80245e-13	0.0269288	0.272587	0.812802	0.00295071	0.0405968	0.00132671	0.000647919	0.809671
HOXC6	0	1.82486e-21	2.88285e-107	4.55949e-13	0.0265806	0.282846	0.811376	0.00289078	0.0406544	-0.00316414	0.0015457	0.809671
PKD1L3	0	1.89979e-21	2.66634e-107	4.82187e-13	0.0262428	0.269177	0.813367	0.00306101	0.0407221	-0.00246885	0.00120645	0.809671
CRTC2	0	1.77942e-21	2.10779e-107	4.8554e-13	0.027122	0.2747	0.812046	0.00288085	0.0407297	-0.00219076	0.0010706	0.809671
TMEM261	0	1.7773e-21	2.55543e-107	4.7756e-13	0.0260879	0.270373	0.806953	0.0030809	0.0408346	-0.00518798	0.00253663	0.809671
IARS	0	1.69217e-21	2.61051e-107	4.41844e-13	0.0272341	0.274762	0.806906	0.00293177	0.0408552	-0.00124411	0.000608362	0.809671
ARL14EPL	0	1.63012e-21	2.7419e-107	4.53971e-13	0.026037	0.277283	0.806947	0.00295888	0.0409364	0.00108097	0.000528798	0.809671
ABCA6	0	1.6174e-21	2.82505e-107	4.75759e-13	0.0263213	0.270425	0.800652	0.00301906	0.0409653	-0.00117877	0.000576726	0.809671
OTUD3	0	1.75563e-21	2.86071e-107	4.54524e-13	0.0261118	0.274443	0.810455	0.00288056	0.0409724	-0.00133451	0.000652944	0.809671
PFKFB2	0	1.76855e-21	2.71691e-107	4.5863e-13	0.0267319	0.274176	0.813468	0.00282474	0.0410255	-0.00159993	0.000783015	0.809671
TMPRSS11A	0	1.57988e-21	2.50845e-107	4.73231e-13	0.0265042	0.275036	0.807545	0.0030479	0.041079	0.00188321	0.000921902	0.809671
GPX6	0	1.9588e-21	2.19694e-107	4.50907e-13	0.0264611	0.27252	0.806652	0.00320881	0.0410851	0.00166165	0.000813464	0.809671
SLFN5	0	1.77156e-21	2.76047e-107	4.35331e-13	0.0264881	0.27277	0.810042	0.00298051	0.0410912	-0.00235494	0.0011529	0.809671
MGLL	0	1.847e-21	3.29868e-107	4.5213e-13	0.0265164	0.275249	0.804768	0.00293325	0.0411244	-0.00259911	0.00127264	0.809671
FAM58A	0	4.01992e-21	2.87065e-107	4.46517e-13	0.0265839	0.275828	0.810622	0.00295239	0.0411659	-0.004688	0.00229593	0.809671
AK3	0	1.71137e-21	3.16211e-107	4.7122e-13	0.0262617	0.275422	0.804648	0.00291414	0.0412202	-0.00208032	0.0010191	0.809671
KRTAP9-8	0	1.78417e-21	3.43709e-107	4.41299e-13	0.0261045	0.273168	0.800135	0.00272837	0.0412529	0.00393222	0.00192662	0.809671
PDHA2	0	1.65999e-21	3.02526e-107	4.57714e-13	0.0262791	0.276646	0.808499	0.00303358	0.0412529	0.00106486	0.000521736	0.809671
MOXD1	0	1.98756e-21	2.83317e-107	4.25189e-13	0.0263594	0.271498	0.812463	0.00298491	0.0412606	0.00150776	0.000738765	0.809671
BANF1	0	1.73086e-21	2.40732e-107	4.3854e-13	0.0264843	0.273998	0.806002	0.00303462	0.0413792	-0.0181877	0.00891674	0.809671
SIRT3	0	1.54596e-21	2.89091e-107	4.70823e-13	0.0262136	0.273687	0.807776	0.00293598	0.0414523	0.00136902	0.000671421	0.809671
PTGIS	0	1.73846e-21	2.97784e-107	4.63784e-13	0.026483	0.273389	0.80394	0.00309854	0.0415024	-0.00102359	0.00050213	0.809671
LDHA	0	1.67564e-21	2.73177e-107	4.45142e-13	0.0257593	0.274689	0.810224	0.00308577	0.0415406	0.00183761	0.000901623	0.809671
ZNF98	0	1.63125e-21	2.40821e-107	4.41262e-13	0.0260158	0.277524	0.803851	0.00275027	0.0415556	-0.0029927	0.00146848	0.809671
FAM110C	0	1.6713e-21	2.95547e-107	4.59203e-13	0.0265033	0.273109	0.809332	0.0031033	0.0415665	0.00271007	0.00132986	0.809671
STK11	0	1.77397e-21	2.52665e-107	4.2564e-13	0.0270673	0.275178	0.805371	0.00305421	0.0415804	0.00331508	0.00162686	0.809671
VPS25	0	1.61526e-21	2.50248e-107	4.85346e-13	0.0258362	0.272318	0.806367	0.00285221	0.0415879	-0.00574522	0.00281955	0.809671
MDH1	0	1.64813e-21	3.19836e-107	4.42855e-13	0.0261871	0.274468	0.801013	0.00290138	0.0415969	-0.00325878	0.00159936	0.809671
SPG11	0	1.67977e-21	3.43947e-107	4.57289e-13	0.0265368	0.274786	0.811933	0.00294982	0.0416653	0.000780899	0.000383383	0.809671
PPIG	0	1.71619e-21	2.45393e-107	4.55689e-13	0.0270439	0.276663	0.810473	0.00315885	0.041744	-0.00344177	0.00169039	0.809671
PLEKHO1	0	1.62785e-21	3.11822e-107	4.39579e-13	0.0266551	0.277021	0.806139	0.00301034	0.0417695	-0.00125169	0.00061483	0.809671
METTL21C	0	1.65551e-21	3.04312e-107	4.68658e-13	0.026309	0.272561	0.800988	0.00308014	0.041806	-0.00165796	0.000814535	0.809671
BORCS8-MEF2B	0	1.75076e-21	3.39027e-107	4.68908e-13	0.0262337	0.272182	0.80376	0.002988	0.0418116	0.0281842	0.0138469	0.809671
DDX60L	0	1.82805e-21	2.44045e-107	4.58576e-13	0.0267297	0.270919	0.808013	0.00304457	0.0418138	0.00117579	0.000577676	0.809671
GMIP	0	1.92157e-21	2.8843e-107	4.57626e-13	0.0261619	0.273508	0.804186	0.00293583	0.0418449	-0.000900676	0.000442576	0.809671
TMEM65	0	1.81722e-21	2.37492e-107	4.34424e-13	0.0260938	0.277335	0.815261	0.00304416	0.0419821	0.00477482	0.00234783	0.81124
WARS	0	1.78239e-21	2.80632e-107	4.54947e-13	0.0263324	0.270117	0.805196	0.00300404	0.0420625	-0.00227853	0.00112082	0.81124
PITX1	0	1.73069e-21	2.65941e-107	4.82803e-13	0.0259604	0.274555	0.80493	0.00305656	0.042067	-0.00316417	0.0015565	0.81124
GSN	0	1.84222e-21	2.66859e-107	4.60475e-13	0.0264643	0.276338	0.813968	0.00312525	0.0421458	-0.00072121	0.00035491	0.81124
ALDH18A1	0	1.60931e-21	2.16685e-107	4.35795e-13	0.0268738	0.27282	0.813191	0.00301298	0.0421496	0.00162699	0.00080066	0.81124
TP53RK	0	1.79584e-21	2.6064e-107	4.36567e-13	0.0266826	0.278666	0.814922	0.00292941	0.0421883	0.00365818	0.00180058	0.81124
SUCLG2	0	1.83014e-21	3.83014e-107	4.51027e-13	0.0259724	0.275978	0.800381	0.00294545	0.0422513	0.00146048	0.000719077	0.81161
PLCB2	0	1.76603e-21	3.06692e-107	4.41157e-13	0.0261278	0.274209	0.816701	0.00307452	0.0422992	0.000770636	0.000379515	0.81169
IFNA16	0	1.73583e-21	2.96495e-107	4.51417e-13	0.0262784	0.280241	0.802722	0.00306479	0.0424656	-0.00236875	0.00116748	0.812844
CALML3	0	1.64909e-21	2.56822e-107	4.76612e-13	0.0266071	0.274971	0.803008	0.00295214	0.0424822	0.00701697	0.00345871	0.812844
RIPK1	0	1.79665e-21	3.1394e-107	4.27398e-13	0.0260824	0.273047	0.808304	0.00296551	0.0425032	0.00200145	0.000986625	0.812844
GIMAP4	0	1.73465e-21	3.31658e-107	4.59775e-13	0.0262683	0.274468	0.806218	0.00303223	0.0426041	-0.00370726	0.00182841	0.812844
COL4A2	0	1.78429e-21	3.40326e-107	4.39949e-13	0.0259168	0.27486	0.806552	0.00299207	0.0426053	-0.00116326	0.000573719	0.812844
ZNF655	0	1.96229e-21	2.87986e-107	4.53897e-13	0.0261961	0.276063	0.805945	0.00284826	0.0426222	0.00139025	0.000685727	0.812844
RDH10	0	1.76531e-21	3.27887e-107	4.18037e-13	0.0264809	0.271237	0.801401	0.00278679	0.0427084	-0.00461816	0.00227881	0.813406
SYP	0	9.852e-22	2.45016e-107	4.29797e-13	0.0264517	0.273409	0.814935	0.00299501	0.0427393	0.00543306	0.00268132	0.813406
RGS7	0	1.89178e-21	2.5183e-107	4.4345e-13	0.0261789	0.273767	0.81465	0.00300957	0.0428669	0.00233915	0.00115512	0.81354
KHSRP	0	1.65114e-21	3.07004e-107	4.69836e-13	0.0259538	0.276322	0.803168	0.00294074	0.0428672	0.00286081	0.00141273	0.81354
DAG1	0	1.48329e-21	2.51309e-107	4.52272e-13	0.0262431	0.276568	0.802835	0.00306312	0.0429304	0.00169962	0.000839568	0.81354
UBA6	0	1.65387e-21	3.22593e-107	4.13047e-13	0.0261738	0.275702	0.802669	0.00300346	0.0429509	0.00101464	0.000501254	0.81354
KCNB1	0	1.6403e-21	3.08822e-107	4.67986e-13	0.026645	0.276211	0.806858	0.00285652	0.0430078	-0.00259391	0.0012818	0.81354
CBFA2T3	0	1.63681e-21	2.59989e-107	4.8142e-13	0.0272282	0.27886	0.817614	0.00318734	0.0430094	0.000968881	0.000478782	0.81354
OR5H2	0	1.6849e-21	2.84884e-107	4.37942e-13	0.0259471	0.267744	0.799509	0.00285946	0.0431815	0.00223334	0.00110454	0.81459
TTYH1	0	1.60929e-21	2.57205e-107	4.63355e-13	0.0270428	0.280492	0.816252	0.00315547	0.0432797	0.00183006	0.000905515	0.81459
GPR183	0	1.59234e-21	2.12894e-107	4.27107e-13	0.0262725	0.27751	0.802965	0.00290042	0.043287	-0.00453706	0.00224502	0.81459
MFSD14A	0	1.71408e-21	3.49701e-107	4.64129e-13	0.0261671	0.277912	0.808048	0.00306474	0.0433561	-0.00273463	0.00135359	0.81459
NXT1	0	1.58811e-21	2.80824e-107	4.5538e-13	0.0264466	0.274169	0.803072	0.00293376	0.0433586	0.00652736	0.00323095	0.81459
IRS4	0	9.1688e-22	2.54594e-107	4.57053e-13	0.0258222	0.279369	0.80358	0.00306365	0.0433958	0.00476192	0.00235751	0.81459
KCNT2	0	1.78526e-21	2.61621e-107	4.8343e-13	0.0264511	0.274223	0.808956	0.00304653	0.0434116	0.0019784	0.00097953	0.81459
SIK3	0	1.58565e-21	2.15898e-107	4.39222e-13	0.0264754	0.274386	0.807375	0.00290542	0.0434161	-0.00121649	0.000602313	0.81459
CATSPERG	0	1.63277e-21	2.42706e-107	4.55815e-13	0.0268274	0.276653	0.813128	0.00304322	0.0435769	0.00128005	0.000634266	0.815471
VWCE	0	1.70432e-21	2.44954e-107	4.64296e-13	0.02638	0.279461	0.811141	0.00291229	0.0436	-0.00180876	0.000896345	0.815471
RGS12	0	1.75642e-21	2.8299e-107	4.73408e-13	0.0259836	0.271146	0.803636	0.0030432	0.043689	-0.000787237	0.000390285	0.815471
GLRA1	0	1.574e-21	2.60944e-107	4.55584e-13	0.0258084	0.275777	0.811295	0.00287349	0.0436967	-0.00217196	0.00107682	0.815471
AKR1A1	0	1.64008e-21	2.74085e-107	4.34628e-13	0.0265966	0.275713	0.811597	0.00265512	0.0437033	0.00143744	0.000712685	0.815471
CACNB4	0	1.63827e-21	2.43706e-107	4.54893e-13	0.0262968	0.273145	0.80168	0.00288396	0.0437267	-0.00177766	0.000881463	0.815471
COX6B2	0	1.62386e-21	3.04252e-107	4.59087e-13	0.0262515	0.279182	0.816601	0.0032764	0.0438153	-0.00342371	0.00169838	0.815611
REM1	0	1.6798e-21	3.42546e-107	4.58583e-13	0.0259481	0.279265	0.800652	0.00284648	0.0438222	-0.00180822	0.000897021	0.815611
SLC28A3	0	1.68002e-21	2.69236e-107	4.67451e-13	0.0262978	0.278131	0.811119	0.00297404	0.0440478	0.00186405	0.000925704	0.818615
PITHD1	0	1.64533e-21	2.612e-107	4.52152e-13	0.0264546	0.28093	0.810707	0.00300813	0.0441229	0.00403956	0.0020068	0.818615
MYO1F	0	1.64374e-21	2.40417e-107	4.24573e-13	0.0263712	0.27313	0.814089	0.00296567	0.0442071	0.000926956	0.000460682	0.818615
KRT34	0	1.77112e-21	2.51079e-107	4.78222e-13	0.0262562	0.274297	0.814484	0.00306377	0.0442219	0.0008209	0.000408002	0.818615
ITM2C	0	1.88451e-21	2.80886e-107	4.61893e-13	0.0259771	0.270534	0.807595	0.00304174	0.0442476	0.00181072	0.00090007	0.818615
GLI4	0	1.77837e-21	2.86536e-107	4.52405e-13	0.0265015	0.275884	0.803903	0.0028341	0.0442483	-0.00225577	0.0011213	0.818615
PEX16	0	1.67992e-21	2.58725e-107	4.71776e-13	0.0263924	0.275935	0.814672	0.00306438	0.0445302	-0.00264598	0.00131701	0.822996
PATZ1	0	1.59127e-21	2.91653e-107	4.38792e-13	0.0265474	0.275965	0.808844	0.00285513	0.0446507	-0.00303332	0.00151066	0.822996
TTLL3	0	1.83978e-21	2.42268e-107	4.35951e-13	0.026469	0.273711	0.811683	0.00307311	0.044708	0.00195799	0.000975382	0.822996
MAGEB16	0	3.07723e-21	2.92086e-107	4.39558e-13	0.0262571	0.27414	0.80755	0.00300981	0.0447183	0.00285431	0.00142196	0.822996
ABLIM1	0	1.70144e-21	2.93174e-107	4.35922e-13	0.026805	0.272719	0.810843	0.00317754	0.0447839	0.00136062	0.000678041	0.822996
LY86	0	1.88837e-21	2.55396e-107	4.46755e-13	0.0271398	0.273818	0.803041	0.00299466	0.0448073	-0.00252058	0.00125622	0.822996
VCX	0	2.36019e-21	2.49831e-107	4.36708e-13	0.0264817	0.27365	0.804357	0.00293855	0.0448594	-0.0111945	0.00558054	0.822996
PRRC1	0	1.84926e-21	2.42301e-107	4.35199e-13	0.025823	0.276068	0.807272	0.0029765	0.0448644	0.00203022	0.0010121	0.822996
CCDC90B	0	1.65398e-21	2.50856e-107	4.57048e-13	0.0264395	0.275489	0.811109	0.00275502	0.0448842	-0.000908257	0.000452826	0.822996
CCND2	0	1.69966e-21	2.44338e-107	4.33043e-13	0.0267215	0.277578	0.810238	0.003068	0.0449304	0.00334721	0.00166916	0.823029
ECSIT	0	1.82856e-21	3.16387e-107	4.54683e-13	0.0260991	0.27244	0.813515	0.00320797	0.045107	-0.00140746	0.000702441	0.824785
C3orf80	0	1.66804e-21	2.89578e-107	4.59706e-13	0.027022	0.275592	0.813236	0.00299628	0.0451152	0.0037701	0.00188167	0.824785
LYNX1	0	1.86147e-21	3.02923e-107	4.33529e-13	0.0268184	0.272185	0.813127	0.00298524	0.0451812	0.00326793	0.00163153	0.825107
ENSA	0	1.65535e-21	2.62006e-107	4.476e-13	0.0268948	0.27255	0.811592	0.00306038	0.0452713	-0.0063632	0.0031782	0.825107
SCD5	0	1.6245e-21	2.62625e-107	4.19245e-13	0.0270493	0.275274	0.805445	0.00296882	0.0453499	0.00243354	0.00121591	0.825107
AKAP12	0	1.76181e-21	3.08044e-107	4.47111e-13	0.0264869	0.275988	0.804639	0.00300559	0.0453588	0.000930922	0.000465152	0.825107
AP2A2	0	1.64728e-21	2.57655e-107	4.62122e-13	0.0270122	0.274596	0.801387	0.00299397	0.0453636	0.001788	0.000893427	0.825107
CD44	0	1.77173e-21	3.48045e-107	4.69149e-13	0.0262581	0.272329	0.807079	0.00281611	0.0454298	0.00120295	0.000601275	0.825107
GBP3	0	2.0075e-21	3.2886e-107	4.58595e-13	0.0261052	0.271043	0.804082	0.00293529	0.0454637	0.00188393	0.000941799	0.825107
LACC1	0	1.52264e-21	2.36711e-107	4.60562e-13	0.0263561	0.276937	0.804433	0.00288302	0.0454885	0.00373784	0.0018688	0.825107
MALT1	0	1.80578e-21	2.64662e-107	4.80205e-13	0.0259875	0.277186	0.801217	0.00295525	0.0456595	0.00204963	0.00102556	0.8274
SPINT1	0	1.75519e-21	3.36886e-107	4.47768e-13	0.0265123	0.27496	0.811933	0.00293347	0.045807	-0.000884461	0.000442854	0.828313
ZYG11B	0	1.7223e-21	2.77617e-107	4.28348e-13	0.0267684	0.271402	0.808328	0.00291981	0.0458517	0.00384969	0.00192796	0.828313
DLX6	0	1.90182e-21	2.30273e-107	4.19643e-13	0.0256256	0.272329	0.801126	0.00287653	0.0459269	0.00363084	0.00181898	0.828313
KCNA3	0	1.71576e-21	3.14334e-107	4.67514e-13	0.0260521	0.280615	0.802668	0.00272862	0.0459668	0.00154361	0.000773464	0.828313
LBH	0	1.59945e-21	2.22459e-107	4.27902e-13	0.0264614	0.274245	0.801739	0.00287526	0.0460239	0.00544633	0.00272973	0.828313
ORC3	0	1.70173e-21	2.66987e-107	4.56543e-13	0.0265086	0.271292	0.809196	0.00298994	0.046028	0.00127873	0.000640918	0.828313
FAM53B	0	1.72468e-21	2.24358e-107	4.1216e-13	0.0260361	0.274434	0.810266	0.00298282	0.0460563	0.00289714	0.00145228	0.828313
SLC37A1	0	1.67669e-21	2.78763e-107	4.51591e-13	0.0258814	0.272477	0.803589	0.00313409	0.0460713	0.00124513	0.000624202	0.828313
PHF21A	0	1.62386e-21	2.7156e-107	4.34883e-13	0.0263405	0.272237	0.801965	0.00292638	0.0461198	-0.00211514	0.00106058	0.828313
SRI	0	1.75149e-21	2.85595e-107	4.5668e-13	0.0261988	0.275082	0.806528	0.00290403	0.0461697	-0.00355249	0.00178172	0.828313
COX7B	0	2.17603e-21	2.96e-107	4.40677e-13	0.0265775	0.272937	0.808763	0.00281152	0.0462464	-0.01395	0.00699894	0.828313
ESRRG	0	1.64875e-21	2.60319e-107	4.39974e-13	0.0258274	0.27614	0.808061	0.00299728	0.0463302	-0.00330742	0.00166003	0.828313
RIPOR2	0	1.73321e-21	2.43217e-107	4.38832e-13	0.0257118	0.274645	0.799969	0.00289543	0.0464125	0.000859973	0.000431792	0.828313
C17orf107	0	1.76696e-21	2.59683e-107	4.64863e-13	0.0261422	0.274434	0.799522	0.00307998	0.0465428	0.00103163	0.00051829	0.828313
PIM1	0	1.60292e-21	2.66243e-107	4.5174e-13	0.0257985	0.275959	0.816477	0.0031307	0.0466575	0.00392022	0.00197054	0.828313
MSANTD3	0	1.76545e-21	2.78471e-107	4.91672e-13	0.0265585	0.275392	0.813558	0.00304997	0.0466723	0.00383891	0.0019298	0.828313
MAATS1	0	1.76425e-21	3.26832e-107	4.7712e-13	0.0261492	0.272575	0.802821	0.00299224	0.0467408	-0.00142501	0.000716567	0.828313
DDX24	0	1.7542e-21	2.83438e-107	4.51887e-13	0.0269948	0.274903	0.813939	0.00284055	0.0467494	-0.00130862	0.000658066	0.828313
NIPSNAP3A	0	1.83439e-21	3.41602e-107	4.51403e-13	0.0263359	0.272699	0.812295	0.00295654	0.0467523	0.00216116	0.0010868	0.828313
ENTPD7	0	1.74765e-21	2.38005e-107	4.55093e-13	0.0258206	0.275745	0.804911	0.00288176	0.046763	-0.00195781	0.000984587	0.828313
C2orf54	0	1.91472e-21	2.72414e-107	4.7102e-13	0.0269374	0.273595	0.806825	0.00289551	0.0467814	-0.0012441	0.000625714	0.828313
CD164L2	0	1.71122e-21	2.60954e-107	4.35072e-13	0.0264675	0.276864	0.804376	0.00300205	0.0468075	0.00309231	0.00155544	0.828313
MAT2B	0	1.68123e-21	2.82523e-107	4.22593e-13	0.0263821	0.273044	0.807634	0.00292654	0.0468264	0.00288568	0.00145164	0.828313
ABCC2	0	1.84947e-21	2.90431e-107	4.74274e-13	0.0266662	0.276333	0.802939	0.00303739	0.0468997	0.000670987	0.000337651	0.828313
MORN3	0	1.70568e-21	3.17423e-107	4.57553e-13	0.0262118	0.275029	0.806546	0.00290296	0.0469484	-0.00215807	0.00108621	0.828313
GYG2	0	2.75332e-21	3.61604e-107	4.74086e-13	0.0268747	0.272182	0.807289	0.00298533	0.0469512	-0.00372106	0.00187293	0.828313
KRT85	0	1.60567e-21	2.40545e-107	4.49294e-13	0.0266041	0.272632	0.808939	0.00307505	0.0470428	0.00159177	0.000801522	0.828313
TRIM66	0	1.70402e-21	3.36843e-107	4.52731e-13	0.0260969	0.274212	0.807235	0.00287791	0.0470463	0.000819984	0.000412903	0.828313
FAM83H	0	1.74144e-21	2.42105e-107	4.43047e-13	0.0266415	0.273655	0.810483	0.00278887	0.0470568	-0.000774338	0.000389936	0.828313
CATSPERB	0	1.77071e-21	2.91804e-107	4.55054e-13	0.0271693	0.276934	0.807817	0.0030585	0.0471218	0.00110476	0.000556491	0.828313
POU3F1	0	1.78252e-21	2.67269e-107	4.23595e-13	0.02703	0.273213	0.811609	0.00285933	0.047153	0.00448773	0.00226089	0.828313
VASH2	0	1.75178e-21	3.13435e-107	4.27363e-13	0.0262167	0.272564	0.809441	0.00298371	0.0471598	-0.00267971	0.00135006	0.828313
ZSCAN1	0	1.93248e-21	3.51008e-107	4.14129e-13	0.0260323	0.276805	0.801603	0.00315444	0.0471829	-0.00155895	0.000785497	0.828313
INO80D	0	1.73169e-21	2.62153e-107	4.30485e-13	0.0264037	0.273104	0.811648	0.00319611	0.0473502	0.00095914	0.00048364	0.829669
MYL7	0	1.80046e-21	2.95395e-107	4.29651e-13	0.026656	0.272469	0.807115	0.00271196	0.0473914	-0.00118812	0.000599212	0.829669
DPT	0	1.8593e-21	3.2036e-107	4.43016e-13	0.0265692	0.274907	0.806858	0.0027584	0.0474198	-0.0011536	0.000581879	0.829669
LCLAT1	0	1.70609e-21	2.47908e-107	4.24518e-13	0.0262478	0.271797	0.805887	0.00303526	0.047439	0.0027245	0.00137436	0.829669
FASTKD2	0	1.73733e-21	2.89355e-107	4.25389e-13	0.0265243	0.277742	0.815369	0.00302397	0.04755	0.00243551	0.00122919	0.830322
MMP21	0	1.62211e-21	3.11889e-107	4.49068e-13	0.0260706	0.272434	0.816185	0.00295995	0.0476456	-0.00123596	0.000624054	0.830322
PRR34	0	1.83271e-21	2.63088e-107	4.38257e-13	0.0262687	0.27472	0.804223	0.00284221	0.0477061	-0.00316171	0.00159683	0.830322
PIK3C3	0	1.64962e-21	2.14879e-107	4.34721e-13	0.0259955	0.275084	0.804222	0.00303106	0.047721	0.00146077	0.000737814	0.830322
EDDM3B	0	1.7403e-21	2.39458e-107	4.06168e-13	0.0263284	0.276074	0.805337	0.0028923	0.0477537	-0.00442864	0.00223717	0.830322
HDAC7	0	1.74226e-21	3.06821e-107	4.77911e-13	0.0269347	0.278238	0.811735	0.00284303	0.0477627	0.00115295	0.000582448	0.830322
SATB2	0	1.73558e-21	2.97747e-107	4.40455e-13	0.0261248	0.276561	0.79976	0.00286352	0.0477896	0.00659394	0.00333153	0.830322
SORBS2	0	1.77722e-21	2.95576e-107	4.64361e-13	0.0266468	0.273996	0.80827	0.00282778	0.0479504	-0.00147566	0.0007461	0.832305
ETV4	0	1.83265e-21	2.57589e-107	4.26813e-13	0.0267163	0.275172	0.80971	0.00312292	0.0480143	0.00107923	0.000545819	0.832305
PSG8	0	1.79843e-21	2.32549e-107	4.56468e-13	0.0256594	0.275417	0.804206	0.00284085	0.0480383	-0.00259055	0.00131031	0.832305
IL36G	0	1.75855e-21	2.99082e-107	4.52327e-13	0.0264275	0.274537	0.80867	0.00283763	0.0482991	0.00540045	0.00273476	0.835479
BMP2K	0	1.87044e-21	2.47903e-107	4.38429e-13	0.0265274	0.273223	0.807191	0.00309798	0.0483254	-0.000847989	0.000429468	0.835479
HSD3B1	0	1.77951e-21	2.33813e-107	4.64657e-13	0.026523	0.278786	0.800352	0.00296868	0.0484138	-0.00134762	0.000682775	0.835479
TMEM160	0	1.89368e-21	3.33303e-107	4.6913e-13	0.0269067	0.27697	0.810402	0.00305401	0.0484324	0.00435698	0.00220766	0.835479
C3orf30	0	1.67304e-21	3.16579e-107	4.61908e-13	0.0268033	0.281174	0.810228	0.00313477	0.0484469	0.00431577	0.00218693	0.835479
JUNB	0	1.69609e-21	2.33394e-107	4.36338e-13	0.0261124	0.273602	0.802389	0.0029931	0.0484916	0.00654656	0.00331799	0.835479
GPX1	0	1.63847e-21	2.59506e-107	4.40899e-13	0.0264299	0.27402	0.807217	0.00306899	0.0485665	0.00350673	0.00177791	0.835993
HOXC9	0	1.64293e-21	3.06734e-107	4.54491e-13	0.0263558	0.275245	0.807622	0.00298935	0.048696	0.00412951	0.00209486	0.837445
CUL4A	0	1.69028e-21	2.96239e-107	4.57126e-13	0.0269137	0.277371	0.810862	0.00294189	0.0488449	-0.00256364	0.00130137	0.838158
CHCHD10	0	1.68268e-21	2.66683e-107	4.55846e-13	0.0256276	0.279104	0.808738	0.00328439	0.0488502	-0.00359022	0.00182253	0.838158
SPATA13	0	1.68225e-21	3.26315e-107	4.295e-13	0.0263602	0.273086	0.799798	0.00289865	0.0488939	-0.000896982	0.000455429	0.838158
RC3H2	0	1.86528e-21	2.30009e-107	4.28595e-13	0.0263659	0.276589	0.810113	0.00306632	0.0489182	0.00176258	0.00089502	0.838158
EMP2	0	1.71812e-21	2.49741e-107	4.35958e-13	0.0261775	0.27427	0.807125	0.00297248	0.0490631	-0.00271301	0.00137852	0.839109
TNIP3	0	1.83906e-21	2.78336e-107	4.32416e-13	0.0265481	0.277339	0.800007	0.00289145	0.0490956	0.00356563	0.00181201	0.839109
TERT	0	1.67394e-21	3.07686e-107	4.45356e-13	0.02617	0.271466	0.808241	0.00317266	0.0491093	0.00351656	0.00178718	0.839109
SLC5A12	0	1.92258e-21	2.90841e-107	4.50002e-13	0.0262039	0.276205	0.811375	0.00302393	0.0492143	0.00211225	0.00107398	0.839387
TGFB1I1	0	1.92848e-21	3.06369e-107	4.48337e-13	0.0269773	0.278399	0.811432	0.002835	0.0492192	0.00169139	0.00086001	0.839387
FKTN	0	1.57769e-21	2.78468e-107	4.44455e-13	0.0261274	0.278302	0.799649	0.00322805	0.0493443	0.00126014	0.000641091	0.839387
RIOX1	0	1.77764e-21	2.46197e-107	4.4526e-13	0.0277197	0.270786	0.810391	0.00311897	0.0494105	0.00417182	0.00212301	0.839387
BCAR3	0	1.78212e-21	3.41091e-107	4.41913e-13	0.0271702	0.277222	0.802568	0.00290203	0.0495437	-0.000624466	0.000317973	0.839387
PEX12	0	1.75756e-21	2.48681e-107	4.63148e-13	0.026092	0.273195	0.800921	0.00305455	0.0495451	0.00111675	0.000568642	0.839387
IGSF23	0	1.82289e-21	2.95572e-107	4.51254e-13	0.0264521	0.277458	0.811728	0.00283757	0.049612	0.00349879	0.00178209	0.839387
CHEK2	0	1.79767e-21	2.35599e-107	4.67136e-13	0.0261568	0.274816	0.805233	0.00273341	0.0496224	-0.00131999	0.00067236	0.839387
CILP	0	1.62363e-21	2.52686e-107	4.92125e-13	0.026176	0.276857	0.80992	0.00313358	0.0497454	-0.000749775	0.000382116	0.839387
ZAP70	0	1.74137e-21	2.92941e-107	4.40639e-13	0.0260638	0.275341	0.812343	0.0029955	0.0498188	-0.00212943	0.0010856	0.839387
UBE2H	0	1.65986e-21	3.6734e-107	4.51006e-13	0.0262032	0.275138	0.804104	0.00297039	0.0498339	0.0188289	0.0095997	0.839387
TMEM94	0	1.64781e-21	2.75995e-107	4.64218e-13	0.0261773	0.277798	0.806408	0.00307071	0.0498427	0.00133673	0.000681542	0.839387
C7orf57	0	1.79556e-21	3.33431e-107	4.52064e-13	0.0270961	0.273672	0.797293	0.00280168	0.0498526	-0.00151654	0.000773254	0.839387
TRIM44	0	1.89694e-21	2.83622e-107	4.44673e-13	0.0266898	0.275691	0.80888	0.00306628	0.0498852	0.00304204	0.0015513	0.839387
PWWP2A	0	1.6902e-21	3.44783e-107	4.19463e-13	0.0262914	0.269798	0.811616	0.00292075	0.0498883	-0.00290455	0.0014812	0.839387
VSTM1	0	1.69634e-21	3.58212e-107	4.68958e-13	0.025893	0.275645	0.805467	0.00319254	0.0499836	0.00338771	0.00172832	0.839387
ALDH3A1	0	1.70605e-21	2.92947e-107	4.49182e-13	0.0261031	0.275752	0.811123	0.00302201	0.050023	0.00108196	0.000552083	0.839387
CD300LG	0	1.78485e-21	2.51815e-107	4.66802e-13	0.0262476	0.27354	0.80782	0.00293288	0.050039	0.00286713	0.00146308	0.839387
EDEM2	0	1.82645e-21	2.1812e-107	4.39821e-13	0.0265887	0.2769	0.809849	0.00296017	0.0501352	0.00160492	0.00081933	0.839387
NEK6	0	1.67743e-21	2.64832e-107	4.48286e-13	0.0266743	0.273764	0.811046	0.0029068	0.0501797	0.00241079	0.00123097	0.839387
TFRC	0	1.7155e-21	2.57251e-107	4.4274e-13	0.0259609	0.27373	0.807431	0.00300439	0.050194	0.00236171	0.00120598	0.839387
ZNF419	0	1.82064e-21	2.69851e-107	4.65048e-13	0.0265062	0.274724	0.804724	0.00293179	0.0502044	-0.00117548	0.000600274	0.839387
PABPC1L2A	0	1.53154e-21	3.10217e-107	4.70848e-13	0.0262235	0.272423	0.808678	0.00300536	0.0502439	0.0398693	0.0203633	0.839387
TELO2	0	1.82691e-21	2.9565e-107	4.42839e-13	0.026365	0.274036	0.80541	0.00290738	0.0502504	0.00118279	0.000604129	0.839387
HIF1AN	0	1.76595e-21	2.74274e-107	4.42402e-13	0.0268805	0.273849	0.807227	0.00282351	0.0502581	-0.00583325	0.00297953	0.839387
OXR1	0	1.70997e-21	2.4821e-107	4.38477e-13	0.0263581	0.27457	0.807654	0.00285347	0.0503702	-0.00164861	0.000842491	0.839387
OSR1	0	1.61861e-21	2.65339e-107	4.56857e-13	0.026331	0.272984	0.80812	0.00298808	0.0504756	0.00338282	0.00172952	0.839387
BCAS1	0	1.75956e-21	2.40532e-107	4.43557e-13	0.0260105	0.280077	0.807159	0.00284006	0.0505368	-0.00168533	0.000861881	0.839387
MYOZ2	0	1.81669e-21	2.85839e-107	4.5068e-13	0.0266452	0.27541	0.813945	0.00288316	0.0505512	0.0031112	0.00159117	0.839387
NUDT16	0	1.67743e-21	3.06739e-107	4.48487e-13	0.0263559	0.272024	0.81048	0.00290243	0.0506649	0.00410742	0.00210171	0.839387
ENOPH1	0	1.69619e-21	2.69658e-107	4.6356e-13	0.0259906	0.274398	0.80367	0.00293861	0.0506922	-0.00415897	0.00212834	0.839387
SAP130	0	1.97355e-21	3.44513e-107	4.45648e-13	0.026384	0.274127	0.809187	0.0029418	0.0507306	0.00183546	0.000939447	0.839387
GNRH2	0	1.90642e-21	2.63178e-107	4.48742e-13	0.0267766	0.275465	0.812608	0.00287055	0.0507562	0.0034196	0.00175045	0.839387
CDK1	0	1.78588e-21	2.70268e-107	4.42453e-13	0.0263778	0.27165	0.810255	0.00286585	0.0507781	-0.00278907	0.00142783	0.839387
CEMP1	0	1.73146e-21	2.69684e-107	4.24361e-13	0.0259515	0.27534	0.80915	0.00313305	0.0508135	-0.0201308	0.0103073	0.839387
DES	0	1.72197e-21	2.78071e-107	4.07902e-13	0.0267247	0.271418	0.808565	0.00280348	0.0508204	-0.00182858	0.000936288	0.839387
PCDH11X	0	6.04956e-21	2.68952e-107	4.61225e-13	0.0268944	0.271772	0.808013	0.00295072	0.0509279	-0.00291444	0.00149297	0.839387
SOX30	0	1.78527e-21	2.58107e-107	4.67414e-13	0.0262894	0.274709	0.806285	0.00278865	0.0509833	0.00115283	0.000590698	0.839387
YY1AP1	0	1.60814e-21	2.37936e-107	4.72973e-13	0.0260498	0.277128	0.807552	0.00307157	0.0509937	0.00149569	0.000766411	0.839387
DYRK4	0	1.65782e-21	2.38521e-107	4.32027e-13	0.0266445	0.272977	0.806475	0.0029517	0.0510054	-0.00216285	0.00110833	0.839387
MOB2	0	1.8439e-21	2.75447e-107	4.61555e-13	0.026101	0.272988	0.803692	0.00289091	0.0510472	-0.0028113	0.00144088	0.839387
IGLL1	0	1.72757e-21	2.55692e-107	4.45266e-13	0.0260995	0.274798	0.804924	0.00285753	0.0510835	-0.00300496	0.00154038	0.839387
PRSS35	0	1.66397e-21	3.09373e-107	4.3278e-13	0.0263462	0.273208	0.810824	0.00294346	0.0511129	0.00247597	0.00126937	0.839387
KIAA1958	0	1.74895e-21	2.59844e-107	4.48904e-13	0.0263977	0.266932	0.806634	0.00302013	0.0511159	-0.00308538	0.00158182	0.839387
FREM3	0	1.82082e-21	2.75278e-107	4.32312e-13	0.0261517	0.269487	0.805358	0.00311041	0.0512499	0.000879451	0.00045114	0.840002
SH2B3	0	1.67365e-21	2.86791e-107	4.75238e-13	0.0260163	0.276177	0.811194	0.00296379	0.0513314	-0.000884796	0.000454041	0.840002
CAPN8	0	1.59556e-21	2.79234e-107	4.81589e-13	0.0260825	0.274911	0.802774	0.00302781	0.0513553	0.00149126	0.000765334	0.840002
CCNJL	0	1.89069e-21	3.38279e-107	4.54683e-13	0.0256697	0.278379	0.802527	0.00281648	0.0514125	0.00173249	0.00088935	0.840002
RPL17-C18orf32	0	1.68766e-21	2.96518e-107	4.39852e-13	0.0263096	0.277596	0.807662	0.00292687	0.0514626	-0.0564188	0.0289681	0.840002
SORCS3	0	1.9417e-21	2.52269e-107	4.81219e-13	0.0267268	0.270381	0.809362	0.00311891	0.0514678	0.00136791	0.000702368	0.840002
TTC17	0	1.96696e-21	3.30658e-107	4.41841e-13	0.0271236	0.274683	0.816826	0.00303444	0.0515088	0.00156719	0.000804828	0.840002
TUFM	0	1.80933e-21	2.29827e-107	4.4542e-13	0.0259817	0.272892	0.813965	0.0026412	0.0515169	0.00209382	0.00107532	0.840002
NRP2	0	1.7508e-21	2.73959e-107	4.26673e-13	0.0261951	0.27452	0.803486	0.00265159	0.0516335	0.000884373	0.000454412	0.840002
CAPRIN1	0	1.71696e-21	2.3957e-107	4.55441e-13	0.0268519	0.27872	0.812902	0.00290244	0.0516347	0.0026191	0.00134576	0.840002
NKX2-4	0	1.86497e-21	2.82944e-107	4.369e-13	0.0264369	0.272864	0.811242	0.00279987	0.0516835	0.00169435	0.000870783	0.840002
PARP11	0	1.79465e-21	3.0655e-107	4.75461e-13	0.0266356	0.275099	0.804233	0.00279257	0.0517046	-0.00198055	0.00101796	0.840002
RAB9A	0	1.21631e-21	3.01423e-107	4.61802e-13	0.0267717	0.270632	0.811122	0.0030082	0.0517658	0.00726374	0.00373439	0.840002
SLC29A2	0	1.75848e-21	2.93048e-107	4.09666e-13	0.0258245	0.271382	0.811059	0.0029273	0.0518609	-0.00211778	0.00108922	0.840002
OR2T10	0	1.75688e-21	2.26496e-107	4.39699e-13	0.0263615	0.275974	0.803096	0.00305268	0.051928	0.00529449	0.00272386	0.840002
USP12	0	1.79228e-21	2.62749e-107	4.46981e-13	0.0260369	0.273388	0.797838	0.0029668	0.0519692	0.00544426	0.0028014	0.840002
FOXR1	0	1.9191e-21	2.81009e-107	4.28898e-13	0.0263583	0.276138	0.806469	0.00295942	0.0520186	0.00177649	0.000914305	0.840002
ROBO2	0	1.73919e-21	3.43075e-107	4.23303e-13	0.0260841	0.269093	0.803661	0.00305568	0.0520715	0.00106736	0.00054946	0.840002
EHD3	0	1.64243e-21	2.7883e-107	4.64533e-13	0.0258709	0.274586	0.802695	0.00278518	0.0520924	-0.00235001	0.00120986	0.840002
GPSM2	0	1.72333e-21	1.91605e-107	4.40182e-13	0.0262775	0.274672	0.80921	0.00289876	0.052234	-0.00136318	0.00070223	0.840002
COL14A1	0	2.01529e-21	2.48754e-107	4.58026e-13	0.0266206	0.273411	0.809791	0.00301207	0.0522575	-0.00069131	0.000356157	0.840002
NME6	0	1.58852e-21	2.61569e-107	4.61508e-13	0.026293	0.273335	0.80131	0.0027985	0.0523282	-0.00220244	0.00113502	0.840002
ARCN1	0	1.69026e-21	2.61254e-107	4.78963e-13	0.0272625	0.271229	0.809445	0.0029797	0.0523311	0.00233815	0.00120497	0.840002
DNAJB9	0	1.80251e-21	2.33032e-107	4.42685e-13	0.0264748	0.273203	0.811678	0.00305592	0.052353	0.00205585	0.00105959	0.840002
CACNG3	0	1.7487e-21	3.02498e-107	4.33226e-13	0.0257439	0.272265	0.804547	0.00289906	0.0523545	-0.00464186	0.00239243	0.840002
ARSA	0	1.75537e-21	3.59081e-107	4.40915e-13	0.0264266	0.278153	0.807105	0.00301201	0.0523947	0.00179896	0.000927348	0.840002
IMPDH2	0	1.71325e-21	2.62829e-107	4.6921e-13	0.0264933	0.272676	0.803951	0.0028765	0.0524402	-0.0024793	0.00127831	0.840002
BRINP1	0	1.79559e-21	2.31835e-107	4.29177e-13	0.0264265	0.278759	0.810363	0.00293827	0.0524441	0.0012406	0.000639655	0.840002
ANKRD13C	0	1.79947e-21	3.42156e-107	4.41391e-13	0.0264621	0.274073	0.810078	0.002919	0.0525446	-0.0022149	0.00114249	0.840002
R3HCC1	0	1.72301e-21	2.99416e-107	4.60365e-13	0.0264433	0.276822	0.800828	0.0028738	0.0526048	0.00238942	0.00123282	0.840002
PRSS45	0	1.64127e-21	2.61446e-107	4.3582e-13	0.0262677	0.273584	0.808684	0.00298228	0.0527476	-0.00294322	0.00151948	0.840002
LBX2	0	1.69403e-21	2.99165e-107	4.90431e-13	0.0264807	0.273456	0.806503	0.00302799	0.0527635	-0.00217234	0.00112158	0.840002
CDK3	0	1.66827e-21	3.08108e-107	4.18838e-13	0.0265645	0.273259	0.808531	0.00302823	0.0527752	-0.00200946	0.00103753	0.840002
DMXL1	0	1.64719e-21	2.03543e-107	4.77104e-13	0.0262127	0.277689	0.805496	0.00284701	0.0528211	-0.000847983	0.000437918	0.840002
MYO1G	0	1.75573e-21	3.29924e-107	4.63427e-13	0.0265769	0.276018	0.810604	0.00314095	0.0528253	0.000967129	0.000499457	0.840002
SMG6	0	1.73335e-21	3.21171e-107	4.57005e-13	0.0267052	0.27639	0.816569	0.00305237	0.0528294	0.00112147	0.000579174	0.840002
CGB3	0	1.65734e-21	2.22768e-107	4.25424e-13	0.0264385	0.275887	0.803081	0.00300128	0.0529045	0.00326999	0.00168929	0.840002
LEPROTL1	0	1.78261e-21	2.58486e-107	4.6547e-13	0.0257092	0.279801	0.807697	0.00298486	0.052951	0.00496559	0.00256575	0.840002
INS-IGF2	0	1.74059e-21	2.55111e-107	4.58042e-13	0.0267236	0.274492	0.806805	0.00293021	0.0529824	-0.00533087	0.00275486	0.840002
ANKRD66	0	1.66193e-21	2.48694e-107	4.13081e-13	0.0258721	0.275669	0.800187	0.00286526	0.0531592	-0.00149223	0.000771721	0.840002
PTP4A1	0	1.64804e-21	2.60631e-107	4.14336e-13	0.0267482	0.278728	0.807594	0.00301521	0.053196	-0.00827158	0.00427838	0.840002
ITPKB	0	1.72527e-21	2.78506e-107	4.27683e-13	0.0260633	0.274216	0.807822	0.00311511	0.0532085	0.00144428	0.000747078	0.840002
MAL	0	1.7494e-21	2.36694e-107	4.68486e-13	0.0264325	0.271591	0.801821	0.00307732	0.0532781	0.0028281	0.00146331	0.840002
DPEP3	0	1.64591e-21	2.48978e-107	4.73973e-13	0.0258279	0.274702	0.802644	0.0028787	0.0533024	0.000880369	0.000455565	0.840002
SEMA4B	0	1.89813e-21	3.38862e-107	4.46214e-13	0.0262958	0.270866	0.801112	0.00307868	0.0533094	0.001296	0.000670662	0.840002
BTG4	0	1.73776e-21	3.22767e-107	4.67164e-13	0.0260668	0.274892	0.805774	0.00293219	0.0533108	0.00394333	0.00204063	0.840002
OXGR1	0	1.7677e-21	2.70887e-107	4.32712e-13	0.0265616	0.276113	0.808744	0.00282105	0.0533183	-0.002011	0.0010407	0.840002
CLEC12A	0	1.77396e-21	2.55224e-107	4.46561e-13	0.0264964	0.274707	0.80984	0.00316201	0.0533405	0.00288212	0.00149165	0.840002
UCP1	0	1.73647e-21	2.97633e-107	4.59437e-13	0.0264711	0.273354	0.802707	0.00258051	0.0533715	0.000931966	0.000482404	0.840002
ARHGAP17	0	1.75243e-21	2.74691e-107	4.86906e-13	0.0262389	0.276165	0.810443	0.00316822	0.0534765	-0.00150067	0.00077712	0.840401
SNCB	0	1.77497e-21	3.02939e-107	4.31454e-13	0.0267275	0.272628	0.804616	0.00295489	0.0537266	-0.00693968	0.00359746	0.840401
BRIX1	0	1.66474e-21	2.36141e-107	4.38103e-13	0.0264456	0.274983	0.804513	0.00304774	0.0537753	0.00229468	0.00118978	0.840401
PRR14L	0	1.74168e-21	2.76355e-107	4.45416e-13	0.0261691	0.2765	0.810959	0.00294822	0.0538304	-0.00129854	0.00067344	0.840401
DYRK3	0	1.75639e-21	3.27532e-107	4.6611e-13	0.0262567	0.275733	0.807627	0.00299458	0.0538532	-0.00210072	0.00108957	0.840401
DBX1	0	1.86713e-21	2.42208e-107	4.31283e-13	0.0264422	0.273452	0.806849	0.0031944	0.0538651	-0.000941305	0.000488245	0.840401
CPB2	0	1.73081e-21	2.50494e-107	4.39224e-13	0.0259327	0.270628	0.813926	0.00306929	0.0539385	-0.0025812	0.00133925	0.840401
MTMR10	0	1.79351e-21	2.40689e-107	4.64904e-13	0.0267023	0.274275	0.807398	0.00297511	0.0539886	-0.00132228	0.000686208	0.840401
ATP6V0A4	0	1.5827e-21	2.52011e-107	4.65965e-13	0.026454	0.274589	0.809935	0.00287602	0.0540196	-0.00142093	0.000737494	0.840401
ISCU	0	1.6603e-21	2.78472e-107	4.19827e-13	0.026667	0.273374	0.808675	0.0027744	0.0540801	0.00290808	0.00150974	0.840401
WFIKKN2	0	1.78493e-21	2.92363e-107	4.62008e-13	0.0269111	0.27206	0.807528	0.00292304	0.0540958	0.00146852	0.000762436	0.840401
LRRN4	0	1.89796e-21	2.61344e-107	4.29106e-13	0.0265359	0.27488	0.809083	0.00287688	0.0541229	-0.00104649	0.000543387	0.840401
RPAP1	0	1.74456e-21	2.76112e-107	4.61357e-13	0.026356	0.273973	0.810558	0.00313545	0.0541436	0.000743024	0.000385846	0.840401
EMILIN3	0	1.5516e-21	2.64508e-107	4.56211e-13	0.0265169	0.274959	0.807597	0.0031183	0.0541565	0.00121236	0.000629601	0.840401
SLCO2A1	0	1.68288e-21	3.05972e-107	4.23537e-13	0.0270349	0.275049	0.80877	0.00291603	0.0542216	0.00120425	0.000625561	0.840401
PLIN1	0	1.78593e-21	2.3884e-107	4.75281e-13	0.0268698	0.277731	0.803883	0.00284274	0.0542542	0.00103431	0.000537357	0.840401
SHCBP1	0	1.86166e-21	3.05497e-107	4.29045e-13	0.026469	0.274786	0.806052	0.00328817	0.054404	-0.00161289	0.000838465	0.840401
LIPN	0	1.80404e-21	3.24949e-107	4.31321e-13	0.0259484	0.276461	0.811965	0.00306871	0.0544338	-0.00130571	0.000678863	0.840401
C20orf85	0	1.78245e-21	2.32422e-107	4.04084e-13	0.0264962	0.273763	0.81622	0.00302568	0.0544426	-0.00212758	0.0011062	0.840401
TERB1	0	1.67233e-21	2.56222e-107	4.08848e-13	0.0260655	0.275508	0.807461	0.00295044	0.0544969	0.00158072	0.000822057	0.840401
MFSD14B	0	1.62841e-21	2.69227e-107	4.65345e-13	0.0265464	0.276765	0.810064	0.00289289	0.0545534	0.0017672	0.000919253	0.840401
GCNT4	0	1.71737e-21	2.98541e-107	4.35789e-13	0.0268839	0.279233	0.800657	0.00287633	0.0545742	-0.00156023	0.00081166	0.840401
RAB20	0	1.66792e-21	3.11688e-107	4.65123e-13	0.0261643	0.277353	0.814032	0.0030884	0.0545764	0.00267018	0.00138909	0.840401
ARL9	0	1.73818e-21	2.457e-107	4.56271e-13	0.0263849	0.275616	0.805689	0.00305235	0.0546318	0.00280855	0.00146141	0.840401
MICA	0	1.9942e-21	3.02701e-107	4.48536e-13	0.0268949	0.271659	0.798119	0.00268215	0.0546415	0.00441237	0.00229604	0.840401
C3orf36	0	1.88982e-21	2.62306e-107	4.5699e-13	0.0264863	0.27136	0.807145	0.00290109	0.0546617	0.00716157	0.00372694	0.840401
THSD4	0	1.69558e-21	2.63114e-107	4.39771e-13	0.0266786	0.276301	0.807664	0.00298165	0.0546843	0.000972897	0.00050635	0.840401
AP2M1	0	1.86215e-21	3.66572e-107	4.54182e-13	0.0260413	0.271256	0.803038	0.00287881	0.0547584	0.00794562	0.00413661	0.840401
KIF21B	0	1.76266e-21	2.88675e-107	4.69014e-13	0.0261382	0.275837	0.80457	0.00275722	0.054777	-0.000864073	0.000449884	0.840401
NAALADL2	0	1.73923e-21	3.38473e-107	4.12169e-13	0.0265007	0.27566	0.80843	0.00300285	0.0548038	0.00151002	0.000786289	0.840401
TAP2	0	1.65129e-21	2.18942e-107	4.64205e-13	0.0266904	0.272239	0.808619	0.00306641	0.0548749	0.00113136	0.000589286	0.840401
CA13	0	1.6642e-21	2.64778e-107	4.43645e-13	0.026364	0.27347	0.809618	0.00297756	0.0550522	-0.00243908	0.00127136	0.840401
FRY	0	1.84595e-21	3.28958e-107	4.35876e-13	0.0266272	0.276586	0.806035	0.00293442	0.055099	0.000887083	0.000462478	0.840401
TTC7B	0	1.8175e-21	2.40884e-107	4.37739e-13	0.0262199	0.276518	0.810966	0.00273982	0.0551147	-0.00131663	0.000686467	0.840401
CLK2	0	1.78879e-21	2.62525e-107	4.64492e-13	0.0263235	0.272967	0.805537	0.00298079	0.055115	0.00151266	0.00078867	0.840401
FSCN2	0	1.72176e-21	2.12714e-107	4.4209e-13	0.0267234	0.270857	0.811609	0.0031155	0.05516	0.000801222	0.000417819	0.840401
TMEM62	0	1.68613e-21	3.03889e-107	4.6358e-13	0.0263227	0.279271	0.804242	0.00289638	0.0551711	-0.0017321	0.000903294	0.840401
FAHD1	0	1.59108e-21	2.53621e-107	4.46785e-13	0.0264173	0.273537	0.812116	0.0031257	0.0551983	0.00247242	0.00128951	0.840401
VTI1A	0	1.75412e-21	2.80175e-107	4.61764e-13	0.0268058	0.269867	0.805685	0.00304021	0.0552042	0.00227949	0.00118892	0.840401
C2CD4A	0	1.67455e-21	2.8372e-107	4.63823e-13	0.0265128	0.273089	0.807574	0.00278265	0.0552085	0.0010998	0.000573636	0.840401
HDHD3	0	1.68366e-21	3.14039e-107	4.62177e-13	0.0257631	0.275275	0.804235	0.00313607	0.0553499	-0.00193611	0.00101043	0.841863
CARNMT1	0	1.86625e-21	2.69843e-107	4.61663e-13	0.0259661	0.27544	0.803929	0.00293211	0.0554414	0.00289374	0.00151076	0.842564
TRIM31	0	1.90552e-21	3.19293e-107	4.41579e-13	0.0264942	0.271571	0.808756	0.00320575	0.0555204	0.000838998	0.000438166	0.843074
EPSTI1	0	1.68442e-21	2.70729e-107	4.71047e-13	0.0267675	0.272771	0.812237	0.00294096	0.055671	0.00326326	0.00170528	0.84467
C15orf52	0	1.70138e-21	3.36328e-107	4.63569e-13	0.0261612	0.274058	0.806235	0.00308044	0.0557973	0.000943894	0.000493506	0.845579
DSTN	0	1.73299e-21	2.87869e-107	4.58003e-13	0.0258733	0.272602	0.803447	0.00301791	0.0558229	0.0080649	0.0042171	0.845579
SMOC2	0	1.76577e-21	2.33767e-107	4.31236e-13	0.0268983	0.273838	0.807973	0.00316414	0.0558676	0.00101773	0.000532264	0.845579
C3AR1	0	1.63485e-21	2.42492e-107	4.40007e-13	0.0266685	0.27493	0.811176	0.00293236	0.055925	0.00203988	0.00106708	0.845757
POU3F3	0	1.707e-21	3.04276e-107	4.79837e-13	0.0260609	0.276982	0.806989	0.00306009	0.0559856	0.00679661	0.00355627	0.845892
ADRA1A	0	1.86307e-21	3.16135e-107	4.55443e-13	0.0258787	0.274561	0.811516	0.00307323	0.056071	-0.00142328	0.000744978	0.845892
NUP62CL	0	1.31628e-21	2.53249e-107	4.90278e-13	0.0264945	0.276633	0.807621	0.0029661	0.0560811	0.0116108	0.00607763	0.845892
ANKRD27	0	1.80438e-21	2.25178e-107	4.1917e-13	0.0259506	0.276992	0.814282	0.00281784	0.0561305	-0.000783693	0.000410303	0.845892
ASPHD2	0	1.80679e-21	2.36553e-107	4.69945e-13	0.0264166	0.274151	0.815172	0.00300464	0.0561618	-0.00352449	0.00184548	0.845892
TRAIP	0	1.96819e-21	2.58695e-107	4.30362e-13	0.0261434	0.27163	0.806932	0.0029638	0.0562558	-0.00189874	0.000994595	0.846076
TMIE	0	1.67286e-21	2.67882e-107	4.62689e-13	0.0260022	0.27606	0.813696	0.00313242	0.0562652	0.00204552	0.00107152	0.846076
SLC46A3	0	1.79568e-21	2.78816e-107	4.27121e-13	0.0264256	0.274743	0.804635	0.00282892	0.0563855	0.00123539	0.000647457	0.847198
RSAD2	0	1.74076e-21	2.95374e-107	4.42725e-13	0.0264026	0.271945	0.812532	0.00295521	0.0564443	-0.00272639	0.00142922	0.847394
NOD1	0	1.72328e-21	3.07161e-107	4.59516e-13	0.0265114	0.274762	0.81252	0.00281106	0.0565618	-0.00119258	0.000625468	0.847976
IL21R	0	1.65631e-21	2.64451e-107	4.41155e-13	0.026451	0.270796	0.800343	0.00291858	0.0565744	0.00284413	0.00149173	0.847976
KLK8	0	1.72644e-21	2.56004e-107	4.58529e-13	0.0265358	0.270316	0.80314	0.00302448	0.0566514	0.00497	0.00260755	0.848446
OSTM1	0	1.76794e-21	3.30713e-107	4.85979e-13	0.0260715	0.271528	0.810272	0.00298759	0.0567114	-0.00211359	0.00110918	0.848658
KRTAP5-8	0	1.71586e-21	2.55934e-107	4.7001e-13	0.0263726	0.270727	0.802135	0.0027981	0.0567737	-0.00424829	0.00223	0.848907
LMAN2L	0	1.87107e-21	2.3364e-107	4.45109e-13	0.026723	0.271444	0.805723	0.00292594	0.056827	-0.0027859	0.00146268	0.84894
HBG2	0	1.66795e-21	2.3615e-107	4.41042e-13	0.0265313	0.276915	0.806761	0.00289017	0.0570822	-0.00988059	0.00519294	0.84894
FAM199X	0	1.26884e-21	2.65147e-107	4.28351e-13	0.0263803	0.280767	0.810391	0.00295392	0.0570879	0.00730037	0.00383695	0.84894
ADORA1	0	1.83415e-21	2.5059e-107	4.40002e-13	0.0268871	0.275353	0.812913	0.00281154	0.0571482	-0.00385734	0.00202784	0.84894
LARP4B	0	1.6888e-21	3.0154e-107	4.47763e-13	0.0257611	0.279989	0.806235	0.00291814	0.0572841	-0.0016146	0.000849276	0.84894
GPR150	0	1.77303e-21	3.48009e-107	4.23425e-13	0.0264702	0.277416	0.803385	0.00273049	0.0573559	-0.000730198	0.000384192	0.84894
IL23A	0	1.72756e-21	2.69707e-107	4.44313e-13	0.0265187	0.272638	0.811224	0.00291199	0.0573828	-0.00469086	0.00246836	0.84894
ZNF8	0	1.58937e-21	2.89191e-107	4.57707e-13	0.02664	0.277127	0.809762	0.00301531	0.0574317	0.00177008	0.000931608	0.84894
RELN	0	1.89731e-21	2.42864e-107	4.51666e-13	0.0260847	0.269432	0.811459	0.0028909	0.0574774	-0.000544557	0.000286658	0.84894
FNIP1	0	1.73009e-21	2.69148e-107	4.66564e-13	0.026755	0.273767	0.80701	0.00289096	0.0574793	-0.00107272	0.000564688	0.84894
DNAAF5	0	1.7462e-21	2.60016e-107	4.30433e-13	0.0264941	0.275149	0.803082	0.00302822	0.0575184	0.000930455	0.000489877	0.84894
ZNF792	0	1.72576e-21	2.2772e-107	4.66005e-13	0.026383	0.273728	0.798996	0.00296875	0.0575451	-0.00214278	0.00112828	0.84894
ST5	0	1.75981e-21	2.90394e-107	4.37013e-13	0.0265613	0.27716	0.810356	0.00304408	0.0575943	0.00096439	0.000507898	0.84894
HSPA6	0	1.72961e-21	2.33586e-107	4.56667e-13	0.0260387	0.277656	0.81047	0.00291629	0.0576141	0.00146536	0.000771795	0.84894
ZBTB4	0	1.65165e-21	2.78598e-107	4.5474e-13	0.0264694	0.27393	0.806812	0.00300012	0.0576398	-0.0021127	0.00111286	0.84894
NEXN	0	1.81778e-21	2.89494e-107	4.35903e-13	0.0265305	0.275603	0.808975	0.00297594	0.0576865	-0.00127829	0.000673462	0.84894
SLC44A5	0	1.66691e-21	2.83836e-107	4.44554e-13	0.0265537	0.274643	0.809572	0.0028649	0.0577964	0.00121425	0.000640004	0.84894
JAM2	0	1.73597e-21	3.06909e-107	4.37162e-13	0.0257841	0.274224	0.803969	0.0028869	0.0578011	0.002938	0.00154858	0.84894
MTFR1	0	1.69902e-21	3.15362e-107	4.53392e-13	0.0268681	0.273636	0.809229	0.00289289	0.0578435	0.00279781	0.00147494	0.84894
TNN	0	1.55557e-21	2.61985e-107	4.53599e-13	0.0266719	0.272273	0.80986	0.00297185	0.057865	-0.000968076	0.000510391	0.84894
OR52E4	0	1.56879e-21	2.65403e-107	4.52855e-13	0.0265696	0.277589	0.803544	0.00294749	0.0578651	-0.00251101	0.00132386	0.84894
PSMG4	0	1.79028e-21	2.91862e-107	4.41527e-13	0.0270117	0.275257	0.814387	0.00294266	0.0578729	0.00229496	0.00120999	0.84894
NCKAP1L	0	1.74353e-21	2.52767e-107	4.71708e-13	0.0265345	0.275425	0.814466	0.00282586	0.0578841	0.00106635	0.000562245	0.84894
ASCC3	0	1.67698e-21	2.39582e-107	4.40358e-13	0.0263447	0.27271	0.811571	0.00304265	0.0579048	-0.00106657	0.000562407	0.84894
RPLP0	0	1.79326e-21	2.81177e-107	4.6696e-13	0.0259928	0.275367	0.808896	0.00308575	0.0580419	0.00386755	0.0020405	0.84894
RASAL1	0	1.67394e-21	2.5342e-107	4.45153e-13	0.0263874	0.272827	0.811689	0.0029771	0.0580744	-0.000928074	0.00048971	0.84894
GALNT18	0	1.73137e-21	3.09001e-107	4.369e-13	0.0262611	0.273621	0.807782	0.0030798	0.0581292	0.00156289	0.00082486	0.84894
DYSF	0	1.8028e-21	2.55213e-107	4.54518e-13	0.0262546	0.271208	0.811748	0.00297226	0.0581328	-0.000543488	0.000286845	0.84894
MROH1	0	1.71074e-21	2.88671e-107	4.46757e-13	0.0259074	0.275868	0.810583	0.00285165	0.0581332	-0.002027	0.00106982	0.84894
FBXL7	0	1.68861e-21	3.27365e-107	4.33119e-13	0.0265923	0.275357	0.803483	0.00304519	0.058178	-0.00237677	0.00125465	0.84894
EIF2B5	0	1.82653e-21	2.60927e-107	4.65307e-13	0.0264101	0.271226	0.812139	0.00303532	0.0581942	0.00186083	0.000982357	0.84894
C1orf131	0	1.65415e-21	2.32681e-107	4.372e-13	0.026772	0.275665	0.811455	0.00290749	0.0582452	0.00346121	0.00182759	0.849017
AXIN2	0	1.71309e-21	2.89586e-107	4.49804e-13	0.0263174	0.276135	0.808883	0.00317033	0.0583787	0.00112071	0.000592073	0.849803
2010-03-01	0	1.77949e-21	3.44599e-107	4.90525e-13	0.0261553	0.273235	0.811303	0.00282265	0.0583908	-0.00174584	0.000922372	0.849803
SPACA4	0	1.80388e-21	2.55393e-107	4.48724e-13	0.0265609	0.273529	0.806919	0.00272783	0.0585734	0.00264143	0.00139655	0.850606
HLA-C	0	1.7085e-21	2.74503e-107	4.66087e-13	0.026315	0.276693	0.807534	0.00314821	0.0586171	0.000723758	0.000382724	0.850606
RFPL1	0	1.76888e-21	3.13593e-107	4.58094e-13	0.0261205	0.273674	0.801471	0.00284309	0.0586405	-0.00486844	0.00257468	0.850606
COL20A1	0	1.74636e-21	2.64109e-107	4.50303e-13	0.0263278	0.274821	0.809073	0.00310032	0.0586467	-0.0010488	0.000554673	0.850606
ALOX5	0	1.59729e-21	2.83216e-107	5.16106e-13	0.0267515	0.274452	0.805953	0.00306997	0.0587091	0.0016816	0.000889556	0.850606
VPS26A	0	1.88044e-21	2.98387e-107	4.23842e-13	0.0271436	0.274788	0.812526	0.00293525	0.058721	-0.00311316	0.00164692	0.850606
FHOD1	0	1.65758e-21	2.97218e-107	4.4237e-13	0.0264351	0.276616	0.810199	0.00283978	0.0587831	0.00091585	0.000484621	0.850822
KCND2	0	1.57394e-21	3.47435e-107	4.31654e-13	0.0261921	0.278168	0.805895	0.00302455	0.0588822	0.0038899	0.00205914	0.850822
ARF4	0	1.80041e-21	3.13981e-107	4.748e-13	0.0261282	0.278868	0.80192	0.00303734	0.0589016	0.00802872	0.00425038	0.850822
SLC9A7	0	8.27242e-22	2.80018e-107	4.46908e-13	0.0269465	0.273442	0.813548	0.00293016	0.058937	0.00313703	0.00166097	0.850822
CABP5	0	1.73335e-21	3.0206e-107	4.54719e-13	0.0265258	0.275869	0.814673	0.00300588	0.0589932	0.00224957	0.00119135	0.850822
C11orf74	0	1.90415e-21	2.9545e-107	4.43259e-13	0.026265	0.273088	0.811524	0.00314528	0.0591536	0.00287952	0.00152593	0.850822
PSMB1	0	1.88426e-21	2.69123e-107	4.5462e-13	0.0269141	0.270623	0.806243	0.00289807	0.0591726	0.00431826	0.00228852	0.850822
PRKN	0	1.74145e-21	2.82493e-107	4.2177e-13	0.0263594	0.275944	0.80417	0.0028031	0.0591872	0.00074794	0.000396404	0.850822
DDX55	0	1.77512e-21	2.90807e-107	4.33201e-13	0.0260737	0.277434	0.799712	0.0029236	0.0592712	0.00147239	0.000780614	0.850822
ITGAX	0	1.80038e-21	2.33322e-107	4.46844e-13	0.0262987	0.269724	0.811055	0.00338163	0.0592984	-0.00106177	0.000562975	0.850822
CRTAP	0	1.76291e-21	2.40422e-107	4.44006e-13	0.0255527	0.276919	0.806314	0.00290156	0.0593145	0.0010888	0.000577346	0.850822
EIF3J	0	1.83697e-21	3.3178e-107	4.44012e-13	0.0266523	0.275447	0.804353	0.00278439	0.059332	0.00429168	0.00227586	0.850822
H6PD	0	1.70649e-21	2.3646e-107	4.43327e-13	0.0267171	0.275338	0.809949	0.00292599	0.0593321	0.000820292	0.000434997	0.850822
GABRG3	0	1.70497e-21	3.16728e-107	4.62942e-13	0.0264214	0.270754	0.802951	0.00299758	0.0593778	0.00211214	0.00112026	0.850822
KCNA1	0	1.62533e-21	2.97533e-107	4.43327e-13	0.02575	0.275196	0.808308	0.00293276	0.0594253	-0.00390405	0.00207106	0.850845
NEDD1	0	1.6898e-21	2.8099e-107	4.8248e-13	0.0266112	0.276221	0.80531	0.00295407	0.0594987	-0.00154442	0.000819534	0.85124
COPB2	0	1.76306e-21	2.82966e-107	4.51613e-13	0.0262224	0.275045	0.809616	0.00302784	0.0595922	0.00185685	0.000985687	0.85192
LRIG1	0	1.75966e-21	3.16279e-107	4.2369e-13	0.0264604	0.271651	0.804143	0.00298672	0.0596499	-0.000878362	0.000466374	0.852089
LCE4A	0	1.83205e-21	2.44748e-107	4.71988e-13	0.026469	0.275016	0.806186	0.00293103	0.0597753	-0.0147993	0.00786165	0.852672
AFAP1L2	0	1.56437e-21	3.04285e-107	4.43428e-13	0.0260088	0.281628	0.803009	0.00281138	0.0597826	-0.00125234	0.000665286	0.852672
UBA3	0	1.82919e-21	2.67901e-107	4.49375e-13	0.026689	0.275541	0.803783	0.00288612	0.0599295	-0.00237132	0.00126045	0.853717
CCDC28B	0	1.73627e-21	2.54633e-107	4.30937e-13	0.0272084	0.273306	0.810047	0.00318672	0.0599479	0.00140286	0.00074573	0.853717
ZNF626	0	1.66831e-21	3.23185e-107	4.87622e-13	0.0263325	0.276242	0.809182	0.00289962	0.0599967	-0.00177155	0.000941896	0.853757
PGA4	0	1.67426e-21	2.6822e-107	4.55041e-13	0.0264707	0.278624	0.801749	0.00291446	0.0600726	-0.00739871	0.00393491	0.854028
TNFRSF18	0	1.82266e-21	2.89017e-107	4.55463e-13	0.0260205	0.277931	0.811022	0.0030899	0.0601482	-0.00177966	0.000946766	0.854028
CYTL1	0	1.59905e-21	2.57969e-107	4.78906e-13	0.0266379	0.270745	0.806459	0.00287769	0.0601538	-0.00525146	0.00279381	0.854028
IRX4	0	1.58775e-21	2.91063e-107	4.39463e-13	0.0262981	0.275642	0.805918	0.0029727	0.0602222	0.00134322	0.000714792	0.854345
GAPVD1	0	1.77515e-21	2.73929e-107	4.40561e-13	0.0266819	0.275327	0.80282	0.00292056	0.0603186	0.000784254	0.000417495	0.854884
ADGRL4	0	1.86834e-21	2.49238e-107	4.32966e-13	0.0259853	0.273669	0.80192	0.00282758	0.0604221	-0.00133244	0.000709607	0.854884
ATP1A3	0	1.88317e-21	2.65718e-107	4.79536e-13	0.0261356	0.274593	0.811747	0.0031098	0.0604347	-0.00176812	0.000941679	0.854884
WRN	0	1.73084e-21	2.89897e-107	4.65435e-13	0.026721	0.274678	0.808048	0.0027661	0.0605873	-0.000609281	0.000324689	0.854884
METTL1	0	1.7598e-21	3.1737e-107	4.30467e-13	0.0265769	0.274646	0.80812	0.00298236	0.0606337	-0.00211558	0.0011276	0.854884
[truncated: 17,243 more rows]

## Sheet: Table S27 triglycerides
Table S27. The summary statitics for the association analysis of triglycerides.
[truncated: 18,557 more rows]

[truncated: 5 more sheets: Table S28 urate, Table S29 urea, Table S30 vitamin D, Table S31 snpnet_varients, Table S32 ML_model_types]
