# Supplementary material for: Gene-based burden scores identify rare variant associations for 28 blood biomarkers
Source: Research Square preprint supplement (doi:10.21203/rs.3.rs-2271894/v1), 2023-02-10
Supplement: Supplementary file 2 [file 2275fe2c05b79d4c326a5367.xlsx]

## Sheet: Table S18 HDL cholesterol
Table S18. The summary statitics for the association analysis of HDL cholesterol
genes	const_pval	sex	age	bmi	PC1	PC2	PC3	PC4	p_value	beta_coef	std_err	fdr_bh_adj_pval
ABCA1	0	0	6.27629e-145	0	0.0540233	0.557806	0.446347	0.0485649	7.22859e-77	-0.000661255	3.56117e-05	1.34134e-72
LCAT	0	0	1.62276e-144	0	0.0748912	0.588213	0.372631	0.0653338	5.16442e-58	-0.00197852	0.000123164	4.79155e-54
LIPG	0	0	6.56783e-145	0	0.0604078	0.573926	0.3906	0.0986648	7.13833e-49	0.000829529	5.64342e-05	4.41529e-45
SCARB1	0	0	1.54225e-144	0	0.0610711	0.567402	0.421083	0.0700182	1.88821e-36	0.000834532	6.61666e-05	8.75939e-33
LIPC	0	0	2.18802e-144	0	0.0618394	0.624181	0.428041	0.0650622	1.4929e-35	0.000724548	5.82041e-05	5.54044e-32
CETP	0	0	4.097e-145	0	0.067443	0.604657	0.393623	0.0868189	2.69985e-29	0.00120245	0.000106988	8.34973e-26
APOA1	0	0	2.19224e-145	0	0.0660342	0.641737	0.412178	0.0695855	3.83772e-24	-0.00114294	0.000112743	1.01733e-20
LPL	0	0	6.97386e-145	0	0.0609754	0.591158	0.420603	0.0699868	9.60207e-20	-0.00103517	0.000113821	2.2272e-16
APOC3	0	0	1.60371e-144	0	0.0600036	0.601795	0.436076	0.0824862	3.45695e-19	0.00168767	0.000188473	7.12746e-16
PLA2G12A	0	0	1.44095e-144	0	0.0558624	0.609482	0.416277	0.0584157	2.31384e-18	-0.000343695	3.93149e-05	4.29356e-15
NR1H3	0	0	3.91707e-145	0	0.0601351	0.602482	0.42188	0.0744897	9.60077e-17	0.000616013	7.41227e-05	1.61956e-13
ANGPTL8	0	0	1.69004e-144	0	0.0592682	0.611431	0.416744	0.0819035	3.73927e-16	0.000743825	9.12921e-05	5.78216e-13
APOA5	0	0	1.20911e-144	0	0.0593872	0.589685	0.438319	0.0686225	1.02152e-14	-0.000665946	8.60681e-05	1.4581e-11
PLIN1	0	0	1.87919e-144	0	0.0619248	0.615588	0.428712	0.0689541	1.30851e-10	0.000306616	4.77098e-05	1.73433e-07
SH2B3	0	0	7.63762e-145	0	0.0564983	0.60899	0.410997	0.0772318	7.31781e-09	-0.000233584	4.03856e-05	9.05262e-06
PDE3B	0	0	7.75002e-145	0	0.0619773	0.607586	0.415657	0.0794281	2.61936e-08	0.000196181	3.52496e-05	3.0378e-05
PPARG	0	0	8.55067e-145	0	0.0587925	0.592896	0.416855	0.0744717	7.95365e-07	-0.000882129	0.000178687	0.000868165
ANGPTL4	0	0	9.61561e-145	0	0.0569383	0.611706	0.425157	0.0751133	8.82961e-06	0.000227424	5.11734e-05	0.00893646
INSR	0	0	8.69908e-145	0	0.0628811	0.596723	0.418808	0.082772	9.15029e-06	0.000181645	4.09432e-05	0.00893646
INS	0	0	8.79748e-145	0	0.0612578	0.601434	0.421619	0.0778081	1.44462e-05	0.00405704	0.000935421	0.0129288
CCDC66	0	0	1.94298e-144	0	0.0564074	0.606044	0.421475	0.071597	1.46316e-05	-0.000106192	2.45003e-05	0.0129288
SOAT2	0	0	1.06279e-144	0	0.0598319	0.591304	0.425206	0.0843595	2.03353e-05	-0.00019453	4.565e-05	0.0171519
NEK7	0	0	8.20434e-145	0	0.0585015	0.61594	0.42622	0.0698985	2.18836e-05	0.000352989	8.3156e-05	0.0176553
PLTP	0	0	7.75903e-145	0	0.0587781	0.617999	0.419655	0.069534	3.39802e-05	-0.000226922	5.4744e-05	0.0262724
STAB1	0	0	1.10112e-144	0	0.058696	0.613624	0.41989	0.081381	5.33998e-05	0.000107867	2.66974e-05	0.0395113
PKD1	0	0	1.10665e-144	0	0.0599074	0.615801	0.420461	0.0719394	5.53618e-05	-8.9075e-05	2.20926e-05	0.0395113
PTGER1	0	0	1.00759e-144	0	0.0587106	0.592173	0.4339	0.0691891	7.34135e-05	0.00024748	6.24151e-05	0.0491106
ALDOB	0	0	1.28464e-144	0	0.0610231	0.584826	0.417781	0.0781343	7.41052e-05	0.000163655	4.12975e-05	0.0491106
TPD52L2	0	0	1.10912e-144	0	0.0600859	0.612005	0.421761	0.0785891	8.80247e-05	0.000455246	0.000116088	0.0563236
NDUFA1	0	0	8.52645e-145	0	0.0576713	0.608014	0.424086	0.0754384	9.17546e-05	0.00378224	0.000966944	0.0567533
APEX1	0	0	1.06093e-144	0	0.0592532	0.587169	0.418172	0.0760453	0.000115528	-0.000402245	0.000104329	0.0691526
UPK3BL1	0	0	1.79563e-144	0	0.0584275	0.605776	0.418692	0.0806454	0.000130027	-0.000844103	0.000220593	0.0753996
SHANK2	0	0	1.05762e-144	0	0.0567776	0.608701	0.414821	0.0730083	0.000137098	-0.00018198	4.77204e-05	0.0770906
RAVER2	0	0	1.30629e-144	0	0.0585623	0.607255	0.414062	0.0795365	0.000149544	0.000330075	8.70467e-05	0.0811432
ZBTB21	0	0	9.20471e-145	0	0.0582577	0.598729	0.427669	0.0784573	0.000153051	0.000346027	9.13923e-05	0.0811432
ZNF266	0	0	9.29232e-145	0	0.0584899	0.59659	0.423105	0.0723363	0.000173281	0.000319504	8.50832e-05	0.0893169
MITF	0	0	1.0612e-144	0	0.0583911	0.607421	0.429716	0.0752359	0.000180929	0.000222347	5.93819e-05	0.0907384
GHITM	0	0	1.21228e-144	0	0.0613411	0.589075	0.423105	0.0795049	0.000189822	0.000353715	9.47714e-05	0.0926931
CPNE2	0	0	1.37161e-144	0	0.0575082	0.608361	0.416466	0.0755773	0.000205135	-0.000311628	8.39354e-05	0.0976024
HCST	0	0	1.36757e-144	0	0.0586543	0.609459	0.415261	0.0737251	0.000254534	-0.000484297	0.000132403	0.118078
STON1	0	0	7.00373e-145	0	0.0594396	0.590547	0.424706	0.0791828	0.000263877	0.00247187	0.000677504	0.119427
PRDM5	0	0	1.2311e-144	0	0.0562671	0.607941	0.418952	0.0787979	0.000298779	-0.000268664	7.42895e-05	0.125232
SPRR4	0	0	8.32882e-145	0	0.0606059	0.600518	0.413517	0.0762348	0.000300857	0.0018667	0.000516424	0.125232
MLXIPL	0	0	9.2853e-145	0	0.0599684	0.605772	0.427208	0.0774547	0.000303471	-0.000154826	4.28594e-05	0.125232
YTHDC2	0	0	9.04978e-145	0	0.061372	0.596777	0.422118	0.0777356	0.0003037	-0.000186945	5.17536e-05	0.125232
FBXL19	0	0	1.00717e-144	0	0.0594061	0.598945	0.423993	0.0844228	0.000375783	0.000266304	7.48756e-05	0.150371
RANBP9	0	0	8.95259e-145	0	0.0587891	0.603392	0.427189	0.0748105	0.00038414	-0.000276563	7.78866e-05	0.150371
AIFM2	0	0	1.06317e-144	0	0.0605955	0.61619	0.410023	0.0859103	0.000395056	-0.000150041	4.2343e-05	0.150371
SCLT1	0	0	1.2038e-144	0	0.0596665	0.60373	0.421959	0.0811364	0.000397079	0.000277994	7.84827e-05	0.150371
PRX	0	0	5.60831e-145	0	0.0602069	0.600486	0.419477	0.0720571	0.00042646	-0.00015388	4.36758e-05	0.158268
JAK2	0	0	8.32699e-145	0	0.0588132	0.602356	0.410297	0.0732345	0.000465992	-0.00015916	4.54786e-05	0.169548
APOE	0	0	9.59365e-145	0	0.0577857	0.595945	0.414432	0.0776611	0.000508846	-0.00029455	8.47347e-05	0.181264
LRRC3	0	0	1.28582e-144	0	0.0591274	0.589735	0.420859	0.0843138	0.000525909	0.000366596	0.00010573	0.181264
CYP17A1	0	0	8.14249e-145	0	0.0583989	0.597183	0.42301	0.077661	0.000540086	0.000409337	0.000118301	0.181264
SEMA4F	0	0	1.21837e-144	0	0.0604118	0.603725	0.412724	0.0825958	0.000543255	-0.000166758	4.82162e-05	0.181264
C18orf32	0	0	8.08908e-145	0	0.061088	0.604956	0.429096	0.0786552	0.000551017	0.000689127	0.000199474	0.181264
CABP1	0	0	9.52558e-145	0	0.0616638	0.599008	0.416899	0.0748654	0.000570876	0.000526708	0.000152883	0.181264
USP19	0	0	9.75637e-145	0	0.058875	0.607759	0.421947	0.0711256	0.000575854	-0.000166296	4.83023e-05	0.181264
DTX4	0	0	1.00106e-144	0	0.057639	0.597277	0.413046	0.0794519	0.000577033	0.000214816	6.24054e-05	0.181264
SKP2	0	0	7.89652e-145	0	0.0583919	0.60813	0.422643	0.0790229	0.00058611	0.000519069	0.000150978	0.181264
CMKLR1	0	0	1.18775e-144	0	0.0612283	0.601359	0.417312	0.0731272	0.000738771	-0.000143206	4.24333e-05	0.224732
TMED4	0	0	6.68531e-145	0	0.0602563	0.600443	0.41503	0.0786055	0.00076922	0.000417174	0.000124022	0.23022
KLHL32	0	0	1.26685e-144	0	0.0611443	0.592597	0.422501	0.075561	0.000797906	-0.000320977	9.57112e-05	0.230331
SLC30A10	0	0	1.11971e-144	0	0.0592985	0.605337	0.41485	0.0765372	0.000804745	-0.000305848	9.12644e-05	0.230331
PLA2G12B	0	0	1.35648e-144	0	0.0590198	0.608637	0.416287	0.0757038	0.000814193	-0.000501769	0.000149871	0.230331
SNX8	0	0	1.3333e-144	0	0.058612	0.597943	0.40938	0.0763915	0.00081924	0.000148909	4.44997e-05	0.230331
WNK4	0	0	9.15728e-145	0	0.0597413	0.605849	0.415656	0.0740646	0.000856316	-0.000136723	4.10088e-05	0.237161
C15orf62	0	0	1.08514e-144	0	0.0613277	0.603593	0.418636	0.0769821	0.00090505	0.000371549	0.000111961	0.244851
HNF4A	0	0	8.68678e-145	0	0.0568709	0.605227	0.424209	0.0730857	0.00091047	-0.000283102	8.53515e-05	0.244851
TSNAXIP1	0	0	1.70756e-144	0	0.0597123	0.605629	0.411312	0.0766455	0.00092822	0.000159562	4.81841e-05	0.246058
MGAT1	0	0	1.16521e-144	0	0.0592398	0.608054	0.424496	0.0782938	0.000944342	0.000489368	0.000147994	0.246806
ZNF443	0	0	1.29075e-144	0	0.0617473	0.60466	0.429967	0.0764949	0.000962754	0.000283549	8.5891e-05	0.248123
VAC14	0	0	1.06647e-144	0	0.0610583	0.592645	0.421812	0.0763722	0.00100989	0.000190085	5.78147e-05	0.256706
ARF5	0	0	1.04194e-144	0	0.0588265	0.596783	0.413469	0.0756189	0.00106741	0.000837244	0.000255866	0.263301
ELMO2	0	0	1.17955e-144	0	0.0580587	0.607178	0.411082	0.0772711	0.00107314	-0.000446825	0.000136615	0.263301
CNTN6	0	0	1.52263e-144	0	0.058238	0.605739	0.422003	0.0782394	0.00107841	9.97043e-05	3.04971e-05	0.263301
HIST1H2AJ	0	0	7.85813e-145	0	0.0594517	0.598481	0.430214	0.0787114	0.00112597	-0.000525587	0.000161368	0.271344
LRRC14	0	0	1.27564e-144	0	0.0615077	0.601557	0.413386	0.0742056	0.00114751	-0.000438019	0.000134705	0.272989
TMEM176B	0	0	1.28379e-144	0	0.0580177	0.605811	0.419455	0.0742015	0.00116995	0.000632509	0.000194848	0.273863
ACADS	0	0	6.98397e-145	0	0.0598184	0.592277	0.422678	0.0777843	0.0011807	0.000209215	6.45013e-05	0.273863
RNF215	0	0	9.53456e-145	0	0.0577838	0.602976	0.427902	0.0732077	0.0012232	-0.00016545	5.11679e-05	0.280219
OR10C1	0	0	1.41284e-144	0	0.0596232	0.602093	0.416743	0.0801344	0.00125661	0.000174007	5.39426e-05	0.28058
LTK	0	0	1.28575e-144	0	0.059194	0.588537	0.420925	0.0749811	0.00128203	0.000106011	3.29223e-05	0.28058
PRKAG3	0	0	8.49528e-145	0	0.0604524	0.605381	0.419421	0.0750877	0.00128211	0.000214408	6.65858e-05	0.28058
SNRPN	0	0	9.01682e-145	0	0.0602864	0.600916	0.412986	0.0779717	0.00128526	0.00102072	0.000317061	0.28058
NKAIN1	0	0	9.142e-145	0	0.0585598	0.592102	0.41263	0.0758115	0.00131209	0.000238835	7.43248e-05	0.282109
CCNL1	0	0	1.35128e-144	0	0.0586133	0.604196	0.415513	0.073541	0.00134028	-0.000563379	0.000175656	0.282109
AKR1C4	0	0	9.66675e-145	0	0.0615925	0.586376	0.411676	0.0732011	0.00135122	-0.000325809	0.000101658	0.282109
PABPC5	0	0	1.76238e-144	0	0.0588919	0.594526	0.422289	0.0781702	0.00135308	0.000675524	0.000210802	0.282109
ITIH4	0	0	8.94159e-145	0	0.0590979	0.591723	0.415828	0.0772097	0.00142124	0.000154633	4.84688e-05	0.291543
PTGS1	0	0	9.7333e-145	0	0.0607367	0.598567	0.424912	0.0742756	0.00142975	-0.000151602	4.75443e-05	0.291543
ABCG1	0	0	1.23734e-144	0	0.0601729	0.603198	0.416133	0.073865	0.00151146	-0.000260275	8.20401e-05	0.304855
CTDP1	0	0	8.05627e-145	0	0.0591301	0.595434	0.413165	0.0766611	0.00153077	-0.000201161	6.34807e-05	0.305429
NR4A3	0	0	1.46838e-144	0	0.0592449	0.593977	0.418863	0.0733492	0.00158129	-0.000359668	0.000113841	0.312154
GPR17	0	0	1.13195e-144	0	0.058939	0.61172	0.433141	0.0693974	0.00160118	-0.000165465	5.24327e-05	0.312752
KMT5A	0	0	6.13112e-145	0	0.0591167	0.603252	0.421446	0.0823182	0.0017693	-0.000294827	9.4299e-05	0.341832
IER3IP1	0	0	1.13291e-144	0	0.059208	0.603512	0.426104	0.0752411	0.0017869	-0.000742835	0.000237814	0.341832
MOAP1	0	0	1.31368e-144	0	0.0584056	0.596372	0.428986	0.0735334	0.00181069	0.000317693	0.000101834	0.342849
ANKDD1A	0	0	1.4698e-144	0	0.0580972	0.599001	0.420454	0.0722962	0.00183107	-0.000215834	6.92571e-05	0.343205
VCP	0	0	1.41243e-144	0	0.0598314	0.603011	0.419779	0.076637	0.00186079	-0.000790228	0.000253957	0.345289
AAAS	0	0	8.56411e-145	0	0.0584927	0.611837	0.418888	0.072931	0.00189972	-0.000207954	6.69622e-05	0.349022
DGAT2	0	0	9.49656e-145	0	0.0589279	0.596375	0.41733	0.07149	0.0019345	-0.000128729	4.15232e-05	0.351928
KLK9	0	0	1.15718e-144	0	0.058547	0.608041	0.418367	0.0741222	0.0019657	0.000305645	9.87407e-05	0.354131
AMZ2	0	0	9.19923e-145	0	0.0586562	0.598091	0.425521	0.0727255	0.00200328	-0.000311279	0.000100744	0.356859
KLHDC10	0	0	9.60692e-145	0	0.0594297	0.60795	0.411943	0.0800445	0.00204877	0.000692071	0.00022447	0.356859
ACAD8	0	0	1.31048e-144	0	0.059698	0.604188	0.410228	0.0809925	0.00205169	0.000220023	7.13732e-05	0.356859
RHOBTB3	0	0	6.2043e-145	0	0.0579779	0.586727	0.42379	0.0752126	0.00205777	-0.000174654	5.66722e-05	0.356859
GPX5	0	0	9.17963e-145	0	0.0602487	0.608267	0.432421	0.0738099	0.00215065	0.000364198	0.000118683	0.369514
CAMSAP1	0	0	1.05814e-144	0	0.0603104	0.601217	0.425509	0.0704081	0.00223592	-0.000142228	4.65251e-05	0.378645
WBP2NL	0	0	1.2448e-144	0	0.0586516	0.609988	0.418482	0.0759704	0.00224461	-0.000609031	0.000199299	0.378645
RNF128	0	0	1.1254e-144	0	0.0587363	0.599702	0.418582	0.0750397	0.00229111	-0.00018125	5.9432e-05	0.383007
KRT82	0	0	1.02965e-144	0	0.058217	0.598917	0.420269	0.0761668	0.00244468	7.98532e-05	2.63528e-05	0.402635
NR0B2	0	0	1.12051e-144	0	0.0589057	0.592278	0.419597	0.079843	0.00246229	0.000380932	0.000125803	0.402635
IGF2	0	0	1.09245e-144	0	0.0592618	0.601845	0.417065	0.0763745	0.00247362	-0.000221627	7.3226e-05	0.402635
OR2A7	0	0	7.90281e-145	0	0.0596901	0.598761	0.426628	0.0741221	0.00256489	-0.00028843	9.56447e-05	0.413861
PHF23	0	0	1.31434e-144	0	0.059979	0.598886	0.412201	0.0804777	0.00261454	-0.000307816	0.000102271	0.418237
CCNDBP1	0	0	1.22729e-144	0	0.0584156	0.599662	0.424831	0.0783718	0.00266167	0.000226658	7.54425e-05	0.422136
TMEM134	0	0	1.68054e-144	0	0.0596624	0.598102	0.418633	0.0755999	0.0027865	-0.000147701	4.93913e-05	0.438189
SCFD1	0	0	1.33234e-144	0	0.0580217	0.600853	0.420925	0.0775914	0.00281263	-0.000175288	5.86726e-05	0.438581
PAPPA	0	0	1.31003e-144	0	0.0598566	0.609492	0.42645	0.076071	0.00286853	-0.000128815	4.32041e-05	0.441804
GAS2	0	0	9.53299e-145	0	0.0580506	0.584237	0.417198	0.0730701	0.00288498	-0.000280726	9.42099e-05	0.441804
FAM83G	0	0	7.56016e-145	0	0.059333	0.595394	0.411776	0.0765424	0.00290472	-0.000130764	4.39144e-05	0.441804
UQCRC2	0	0	1.04493e-144	0	0.0598631	0.603109	0.414187	0.0788729	0.00293225	0.000437104	0.000146935	0.442365
MICU3	0	0	1.49075e-144	0	0.0601327	0.605467	0.409718	0.0781189	0.00297237	-0.000192272	6.47241e-05	0.4448
CORO1C	0	0	1.14443e-144	0	0.0606633	0.601947	0.410711	0.0752946	0.00319441	-0.000456786	0.000154925	0.469852
SYT13	0	0	9.81535e-145	0	0.0599531	0.59808	0.411229	0.0762635	0.00319923	-0.000303543	0.000102967	0.469852
KLF12	0	0	1.73479e-144	0	0.0582986	0.599268	0.422819	0.0777809	0.00321574	0.000443675	0.000150583	0.469852
NRDC	0	0	9.18332e-145	0	0.0605852	0.602068	0.422103	0.0820328	0.00324377	0.000165784	5.63184e-05	0.469959
ADH1B	0	0	1.48719e-144	0	0.0605662	0.597604	0.414346	0.0799081	0.00326712	0.00014114	4.79826e-05	0.469959
ZBED5	0	0	1.20903e-144	0	0.0582531	0.618039	0.425493	0.0753121	0.00344436	-0.000324116	0.000110806	0.491643
SCGB3A1	0	0	9.05812e-145	0	0.0610202	0.600026	0.421121	0.0790235	0.00348259	-0.00154161	0.000527653	0.492333
NAT6	0	0	9.51252e-145	0	0.0618579	0.600679	0.427047	0.0732411	0.00350226	-0.00013704	4.69335e-05	0.492333
CEBPZOS	0	0	8.60059e-145	0	0.0607319	0.602736	0.412509	0.0751398	0.00362848	-0.0292566	0.0100579	0.506241
PIEZO1	0	0	9.03422e-145	0	0.0586522	0.608017	0.421933	0.0736485	0.00367791	-5.24044e-05	1.80419e-05	0.509309
C6orf10	0	0	1.18858e-144	0	0.0614715	0.602745	0.419011	0.0795567	0.00381025	0.000228454	7.89539e-05	0.517953
ENAM	0	0	7.65134e-145	0	0.0598182	0.598106	0.427663	0.0786646	0.00385262	0.000263821	9.12865e-05	0.517953
DISP3	0	0	9.54039e-145	0	0.0596472	0.598583	0.423376	0.0784787	0.00387679	-0.000111052	3.84521e-05	0.517953
ATG2A	0	0	9.58054e-145	0	0.0587677	0.605069	0.418423	0.0738984	0.00388159	0.000102472	3.54861e-05	0.517953
NUDT10	0	0	8.65697e-145	0	0.0574427	0.606095	0.421645	0.0770806	0.00392063	0.000737917	0.000255819	0.517953
DAGLB	0	0	8.78445e-145	0	0.058715	0.605337	0.418483	0.0768068	0.00392329	0.000100253	3.47581e-05	0.517953
GPR18	0	0	9.09932e-145	0	0.0601772	0.610299	0.413379	0.0757743	0.00398616	0.000374143	0.000129942	0.517953
TNP1	0	0	1.13994e-144	0	0.0591056	0.595411	0.420332	0.0813732	0.00401816	0.00062894	0.000218626	0.517953
ZNF217	0	0	9.81162e-145	0	0.0598455	0.592289	0.41897	0.0809269	0.00401946	-0.000201322	6.99842e-05	0.517953
ZSCAN23	0	0	1.07806e-144	0	0.0599872	0.599732	0.423716	0.079211	0.00401946	0.000337543	0.000117338	0.517953
ACTR1B	0	0	7.65759e-145	0	0.0587736	0.605633	0.420009	0.0799346	0.00405894	-0.000227064	7.90175e-05	0.518126
CD2AP	0	0	1.25401e-144	0	0.0594976	0.612386	0.419291	0.0793077	0.00407665	0.000277596	9.66487e-05	0.518126
CLDN6	0	0	1.0051e-144	0	0.0591172	0.604654	0.415762	0.0775848	0.00415374	0.000381854	0.000133222	0.518616
C14orf159	0	0	1.00211e-144	0	0.0590562	0.591004	0.419469	0.0696824	0.00420321	-0.000231535	8.08842e-05	0.518616
SMPD4	0	0	1.12683e-144	0	0.0600979	0.599621	0.411282	0.077213	0.00421243	0.000171771	6.0021e-05	0.518616
PAGE2B	0	0	8.61864e-145	0	0.0583596	0.607573	0.420291	0.078159	0.00425428	0.00236119	0.000825961	0.518616
GPBAR1	0	0	1.3481e-144	0	0.0597387	0.60457	0.416804	0.0751051	0.00426348	-0.000256522	8.97549e-05	0.518616
HYAL3	0	0	1.16931e-144	0	0.0613997	0.598322	0.428484	0.0756861	0.00427854	0.000181245	6.3441e-05	0.518616
SAP30L	0	0	9.33715e-145	0	0.0611616	0.606011	0.420861	0.0791911	0.00428581	0.000607057	0.000212527	0.518616
EEF2K	0	0	1.12862e-144	0	0.0613938	0.59881	0.418854	0.0754509	0.0043041	-0.000100773	3.52968e-05	0.518616
FHL2	0	0	1.10915e-144	0	0.0610946	0.605273	0.423459	0.0767077	0.00439084	-0.000216936	7.61533e-05	0.521268
ARL2BP	0	0	1.09382e-144	0	0.0587531	0.607076	0.418654	0.0780004	0.00439623	-0.000710915	0.000249594	0.521268
PEX1	0	0	1.03092e-144	0	0.0611919	0.600087	0.425593	0.0746309	0.00444535	-0.000173525	6.09986e-05	0.521268
SLC25A36	0	0	1.01024e-144	0	0.0596297	0.601817	0.417697	0.076338	0.0044456	0.00049077	0.000172519	0.521268
ASZ1	0	0	9.93432e-145	0	0.0587056	0.594615	0.423143	0.074945	0.00447306	-0.000233725	8.22175e-05	0.521268
TMEM158	0	0	1.27074e-144	0	0.058969	0.598152	0.415866	0.0804634	0.00449466	0.000686388	0.000241581	0.521268
OVOL1	0	0	7.66694e-145	0	0.0614416	0.603658	0.415118	0.0752935	0.00452329	0.000217696	7.66749e-05	0.52133
ANXA13	0	0	1.33951e-144	0	0.0594867	0.601411	0.425805	0.0762688	0.00460245	-0.000242263	8.54945e-05	0.527179
MT3	0	0	7.96015e-145	0	0.0599377	0.604965	0.412653	0.0753725	0.00473785	0.000318094	0.000112624	0.538344
KCTD1	0	0	1.12989e-144	0	0.0616152	0.604637	0.415871	0.0769154	0.00479905	0.00047207	0.000167385	0.538344
TMCO1	0	0	1.1495e-144	0	0.0593952	0.595843	0.42012	0.0737269	0.00488447	-0.000231972	8.24172e-05	0.538344
YTHDF1	0	0	1.24841e-144	0	0.0592811	0.598667	0.42906	0.0783569	0.00488612	0.00019034	6.76287e-05	0.538344
GAN	0	0	9.71447e-145	0	0.0590778	0.613927	0.41533	0.0745743	0.00493396	-0.000209204	7.44137e-05	0.538344
EPB41L1	0	0	8.54886e-145	0	0.0601095	0.602033	0.417863	0.0755269	0.00493683	0.000149438	5.31587e-05	0.538344
INSL3	0	0	1.23209e-144	0	0.0589949	0.607425	0.419901	0.0701351	0.0049384	0.000263202	9.36306e-05	0.538344
SIPA1L2	0	0	1.13596e-144	0	0.0601976	0.614991	0.416425	0.0754585	0.00495286	-8.52036e-05	3.03202e-05	0.538344
RPN2	0	0	1.07208e-144	0	0.0586103	0.601444	0.425983	0.0786742	0.00497351	0.000259309	9.23205e-05	0.538344
E2F2	0	0	1.19161e-144	0	0.05952	0.617152	0.420943	0.0760151	0.00507965	-0.000218425	7.79536e-05	0.538344
GALNT2	0	0	1.24907e-144	0	0.0584926	0.605537	0.412197	0.0764951	0.00509178	-0.000226137	8.0728e-05	0.538344
SFT2D3	0	0	1.28038e-144	0	0.0586376	0.595706	0.419099	0.0759231	0.00509461	-0.000315215	0.000112535	0.538344
GIPR	0	0	1.05093e-144	0	0.0607425	0.600971	0.408196	0.0789454	0.00511766	-0.000169106	6.04042e-05	0.538344
SMG9	0	0	1.34009e-144	0	0.0580915	0.604913	0.411869	0.0769003	0.00515452	-0.000250381	8.95095e-05	0.538344
SIGIRR	0	0	1.05514e-144	0	0.0596485	0.601463	0.415532	0.0785835	0.00516241	-0.000192714	6.89058e-05	0.538344
ABHD18	0	0	1.03251e-144	0	0.0593396	0.596899	0.419406	0.0739119	0.00516411	-0.000135079	4.83e-05	0.538344
MID1	0	0	1.03694e-144	0	0.0608031	0.603301	0.426252	0.0756247	0.00523012	0.000451346	0.000161625	0.54218
SMIM12	0	0	7.48786e-145	0	0.0584343	0.596718	0.424959	0.0770952	0.00536258	-0.000658534	0.000236504	0.546088
RAD1	0	0	7.03697e-145	0	0.0604837	0.597443	0.416697	0.073736	0.0053751	0.000117723	4.229e-05	0.546088
C1orf115	0	0	1.05885e-144	0	0.0581252	0.604391	0.423798	0.0741722	0.00544457	0.000345347	0.000124247	0.546088
ATL3	0	0	1.07309e-144	0	0.058406	0.601313	0.409846	0.0844098	0.00544484	-0.000243667	8.76655e-05	0.546088
PLAGL2	0	0	9.19456e-145	0	0.0582531	0.595349	0.415413	0.076785	0.00545556	-0.000198504	7.14331e-05	0.546088
LRRC61	0	0	1.13805e-144	0	0.0594616	0.600986	0.419271	0.0733245	0.00550122	-0.000351604	0.000126651	0.546088
ARHGEF5	0	0	1.81874e-144	0	0.0581164	0.594577	0.417552	0.0779187	0.00554196	-0.000132575	4.7796e-05	0.546088
SCYL1	0	0	1.00505e-144	0	0.0590252	0.609841	0.424404	0.0729487	0.0055668	-0.000150033	5.41185e-05	0.546088
IAPP	0	0	1.60967e-144	0	0.0600483	0.601588	0.422404	0.0757065	0.00556879	0.00115189	0.000415517	0.546088
RASD1	0	0	8.93528e-145	0	0.0593551	0.598502	0.421616	0.0795034	0.00558437	-0.00032403	0.000116924	0.546088
CD248	0	0	8.62159e-145	0	0.0593248	0.602089	0.413677	0.0809066	0.00559683	-0.000126537	4.56719e-05	0.546088
GSG1L	0	0	1.29022e-144	0	0.058683	0.596016	0.433786	0.077115	0.00565321	-0.000199941	7.22515e-05	0.546088
SLC22A7	0	0	9.79019e-145	0	0.0605651	0.607989	0.417354	0.0774051	0.00565661	-0.000186927	6.75535e-05	0.546088
GLA	0	0	1.60356e-144	0	0.0601173	0.598798	0.422647	0.0779706	0.00567983	0.000247817	8.9602e-05	0.546088
CACNA1I	0	0	8.51744e-145	0	0.0599356	0.609245	0.423739	0.073813	0.00572048	-0.000102103	3.69481e-05	0.547161
ZNF91	0	0	7.9239e-145	0	0.0599232	0.604268	0.423757	0.0738532	0.00583212	0.000280282	0.000101658	0.552098
CEP89	0	0	9.18175e-145	0	0.059985	0.607885	0.419876	0.0706808	0.00584481	-0.000128393	4.65799e-05	0.552098
HRH4	0	0	1.18674e-144	0	0.0606068	0.598286	0.413668	0.077453	0.0059498	-0.000238162	8.65861e-05	0.552098
HDAC4	0	0	1.00561e-144	0	0.0602061	0.609001	0.412928	0.0798834	0.00601007	-0.000120096	4.37147e-05	0.552098
LAMA4	0	0	9.66599e-145	0	0.05766	0.61601	0.417885	0.0776607	0.00601676	-0.0001314	4.78356e-05	0.552098
ZBED4	0	0	9.48142e-145	0	0.0599006	0.611108	0.423159	0.0755516	0.00603189	-0.000235128	8.56229e-05	0.552098
ARMC12	0	0	9.87889e-145	0	0.0592135	0.598714	0.420708	0.0784261	0.00603683	0.00015942	5.80592e-05	0.552098
SLC10A4	0	0	9.33108e-145	0	0.0596785	0.610657	0.422111	0.074622	0.00604381	0.000356274	0.000129769	0.552098
C1orf141	0	0	1.14215e-144	0	0.0591159	0.597229	0.41247	0.0803539	0.00607899	-0.000342658	0.000124897	0.552098
OR52B6	0	0	7.55018e-145	0	0.0585587	0.596594	0.427169	0.0783202	0.00608296	0.000393792	0.000143546	0.552098
UBR2	0	0	1.02433e-144	0	0.0585515	0.597532	0.418362	0.0741483	0.00609937	-0.000183449	6.68926e-05	0.552098
MCTS1	0	0	1.31703e-144	0	0.0612264	0.606513	0.42581	0.0748126	0.00621098	-0.000461056	0.000168486	0.559471
SLC1A4	0	0	1.1021e-144	0	0.0614815	0.60807	0.418875	0.0788166	0.00624795	-0.000167855	6.13839e-05	0.560082
FOXD4L1	0	0	9.71063e-145	0	0.0621084	0.604269	0.416999	0.0758004	0.00630948	-0.000514152	0.000188245	0.562878
PLA2G2C	0	0	1.18513e-144	0	0.0595938	0.597086	0.412889	0.0804122	0.00638559	-0.00107476	0.000394069	0.56383
UBE2V1	0	0	9.54395e-145	0	0.0603219	0.59892	0.416674	0.0776207	0.00642877	0.00149912	0.000550112	0.56383
ZNF787	0	0	9.2207e-145	0	0.0596991	0.597011	0.419001	0.079995	0.00652459	0.000284946	0.000104751	0.56383
OR2AT4	0	0	1.05079e-144	0	0.0610506	0.595096	0.420048	0.0817553	0.00653142	-0.000178336	6.55675e-05	0.56383
PLPP6	0	0	8.80247e-145	0	0.0596265	0.599144	0.420929	0.0783346	0.00658533	-0.000140186	5.15928e-05	0.56383
OPRPN	0	0	1.13786e-144	0	0.05878	0.599669	0.4203	0.07664	0.00665278	0.000829252	0.00030557	0.56383
TTC30B	0	0	6.80192e-145	0	0.0585734	0.603557	0.416027	0.0770618	0.00666647	-0.000244434	9.0094e-05	0.56383
NKAIN4	0	0	5.6335e-145	0	0.0589014	0.604398	0.417333	0.0748829	0.00669054	-0.00031793	0.000117235	0.56383
TFCP2	0	0	7.47077e-145	0	0.0596613	0.602502	0.420552	0.0755365	0.00671655	0.000406517	0.000149972	0.56383
CLN3	0	0	7.69987e-145	0	0.0579321	0.607184	0.423523	0.0757629	0.00678573	-0.000221872	8.19554e-05	0.56383
SLC2A4	0	0	1.10837e-144	0	0.0604045	0.596255	0.425054	0.0714995	0.00678955	0.000161522	5.96675e-05	0.56383
HBE1	0	0	9.98634e-145	0	0.0588719	0.603102	0.414467	0.0797769	0.006885	0.00063506	0.000234999	0.56383
SSTR2	0	0	1.07727e-144	0	0.0620462	0.606709	0.412963	0.0756216	0.00689217	0.000415741	0.000153861	0.56383
CLDN34	0	0	1.42123e-144	0	0.059874	0.602186	0.417434	0.0772997	0.0068943	0.00054816	0.000202876	0.56383
FSTL4	0	0	6.86229e-145	0	0.0593065	0.603478	0.420251	0.0772745	0.00694837	-0.000131332	4.86533e-05	0.56383
IQCC	0	0	1.04072e-144	0	0.0594722	0.604635	0.420484	0.0687099	0.00698358	0.000115175	4.26943e-05	0.56383
NT5C3A	0	0	1.06074e-144	0	0.0597756	0.604453	0.411413	0.0753444	0.00698361	0.000250723	9.29406e-05	0.56383
ZNF528	0	0	1.30319e-144	0	0.0617036	0.604059	0.423325	0.0743807	0.00701951	0.000117953	4.37517e-05	0.56383
JAK1	0	0	1.50084e-144	0	0.0583779	0.602715	0.431577	0.073294	0.00707843	-0.00018161	6.74335e-05	0.56383
TMEM54	0	0	1.33477e-144	0	0.0616434	0.59001	0.420058	0.0791617	0.00710709	0.000265775	9.87343e-05	0.56383
MOB3A	0	0	7.49543e-145	0	0.0612623	0.593126	0.420983	0.0731683	0.00713563	-0.000170877	6.35116e-05	0.56383
PIK3IP1	0	0	1.25403e-144	0	0.0601165	0.599169	0.423548	0.0764526	0.00723427	0.000306247	0.00011402	0.56383
KEAP1	0	0	1.11339e-144	0	0.0597137	0.592628	0.422969	0.0756135	0.00727374	-0.000291128	0.000108464	0.56383
TACR1	0	0	9.21172e-145	0	0.0595743	0.596726	0.429242	0.073549	0.00734914	-0.000195796	7.30408e-05	0.56383
STT3A	0	0	8.8285e-145	0	0.0593627	0.600815	0.413504	0.0777705	0.00739946	0.000366805	0.000136952	0.56383
BRICD5	0	0	8.33681e-145	0	0.059468	0.60721	0.422837	0.0759973	0.00741431	0.000142555	5.32382e-05	0.56383
THADA	0	0	1.16515e-144	0	0.0607099	0.60119	0.416257	0.0827887	0.00741435	7.71327e-05	2.88058e-05	0.56383
SPANXD	0	0	1.245e-144	0	0.0599087	0.600904	0.412497	0.0759202	0.0074177	0.000911286	0.000340346	0.56383
DCTN5	0	0	1.09021e-144	0	0.0615903	0.601946	0.414383	0.0740016	0.00742784	-0.000576713	0.000215427	0.56383
KDM4B	0	0	1.21743e-144	0	0.058851	0.604031	0.423682	0.0766816	0.00745996	-0.000206708	7.72559e-05	0.56383
NHSL2	0	0	1.28001e-144	0	0.0598241	0.603312	0.418166	0.0816324	0.0075212	-0.000208323	7.79395e-05	0.56383
LIFR	0	0	1.157e-144	0	0.0619526	0.598026	0.419063	0.0743635	0.00755197	-0.000141876	5.3107e-05	0.56383
PFKFB1	0	0	8.83132e-145	0	0.0602489	0.597732	0.42688	0.0759747	0.0075605	-0.000235552	8.81842e-05	0.56383
OR5I1	0	0	1.0493e-144	0	0.0589835	0.600755	0.427165	0.0730779	0.00759361	-0.000397002	0.000148709	0.56383
FAM110C	0	0	1.07642e-144	0	0.0594323	0.605517	0.422169	0.0727961	0.00760625	-0.000319315	0.000119634	0.56383
ILKAP	0	0	9.2484e-145	0	0.0599572	0.605377	0.419902	0.0739324	0.00761968	-0.000346051	0.000129679	0.56383
CTTNBP2NL	0	0	1.32086e-144	0	0.061313	0.600587	0.421291	0.0724676	0.00763128	-0.00024889	9.3287e-05	0.56383
KDM4C	0	0	8.42642e-145	0	0.0580438	0.592713	0.423383	0.0744183	0.00766376	-0.000210596	7.89761e-05	0.56383
RAD52	0	0	8.68891e-145	0	0.05872	0.591289	0.421086	0.0767451	0.00769062	-0.000427372	0.000160341	0.56383
TANC1	0	0	1.31021e-144	0	0.0594554	0.601342	0.416239	0.0758077	0.00769618	-0.000102243	3.83628e-05	0.56383
EIF3G	0	0	8.07052e-145	0	0.0592962	0.607381	0.415994	0.0775081	0.00779234	-0.000606673	0.000227989	0.56383
OGN	0	0	1.268e-144	0	0.0586793	0.609411	0.423438	0.0755873	0.00780016	0.00041043	0.00015426	0.56383
CYP2E1	0	0	7.95692e-145	0	0.0604945	0.588563	0.426439	0.0745566	0.0078004	-0.000242398	9.11055e-05	0.56383
EIF2S3	0	0	1.08801e-144	0	0.0602839	0.601965	0.422952	0.0760531	0.00780344	-0.00163621	0.000615003	0.56383
COPA	0	0	8.72292e-145	0	0.0586986	0.603902	0.412303	0.0748991	0.00780743	-0.000191506	7.19857e-05	0.56383
CCER1	0	0	8.1934e-145	0	0.0604056	0.593665	0.4119	0.0759907	0.00781012	-0.000783648	0.000294581	0.56383
TRIM27	0	0	8.09796e-145	0	0.0607883	0.592037	0.421753	0.075254	0.00782055	0.000299241	0.000112507	0.56383
CD3EAP	0	0	1.19366e-144	0	0.0611671	0.602451	0.415679	0.0757487	0.00782256	0.000161498	6.07209e-05	0.56383
OR10K1	0	0	9.44207e-145	0	0.0586668	0.595851	0.417469	0.078479	0.00784966	0.000337681	0.000127019	0.56383
SF3B1	0	0	8.25744e-145	0	0.0600798	0.608156	0.415607	0.0768007	0.00786507	-0.000476299	0.000179205	0.56383
ADCK1	0	0	1.09882e-144	0	0.061544	0.599332	0.422388	0.0803411	0.00792058	-0.000126408	4.76027e-05	0.56383
OR5D14	0	0	1.07049e-144	0	0.0598406	0.591888	0.417792	0.0726403	0.00794808	0.000310763	0.000117079	0.56383
GNB4	0	0	8.87638e-145	0	0.0609707	0.589625	0.414067	0.0727045	0.00795607	-0.000279174	0.000105191	0.56383
BCDIN3D	0	0	1.19383e-144	0	0.0596188	0.601444	0.424132	0.0762201	0.00800069	0.000214416	8.08483e-05	0.56383
GLB1L2	0	0	9.52118e-145	0	0.0591517	0.597628	0.412534	0.0752999	0.00801458	-0.000240342	9.06439e-05	0.56383
RASSF2	0	0	8.75941e-145	0	0.0593347	0.600986	0.414145	0.0778882	0.00802172	-0.000250457	9.44696e-05	0.56383
ARSK	0	0	1.01552e-144	0	0.0613057	0.600692	0.419775	0.0786512	0.00807689	0.000147888	5.58305e-05	0.565199
CCDC115	0	0	7.58806e-145	0	0.0588263	0.603665	0.419761	0.0759404	0.00817459	0.000358104	0.000135399	0.565199
MRPL14	0	0	1.12451e-144	0	0.059601	0.593914	0.416041	0.0810533	0.0081771	0.000473541	0.000179052	0.565199
OR5B2	0	0	9.89718e-145	0	0.0600553	0.598681	0.427102	0.0747186	0.00818737	-0.000391948	0.000148225	0.565199
MGAT4C	0	0	8.86883e-145	0	0.064325	0.592909	0.415417	0.0781855	0.0081935	-0.000367759	0.00013909	0.565199
ADA	0	0	8.25003e-145	0	0.0610194	0.602124	0.423394	0.0739501	0.00829198	-0.00029955	0.000113466	0.567225
FBXL12	0	0	1.35869e-144	0	0.0570912	0.602431	0.413055	0.0750776	0.00829924	-0.000256468	9.71585e-05	0.567225
EZH1	0	0	7.46174e-145	0	0.0587454	0.601304	0.415936	0.0800205	0.00831457	-0.00027359	0.000103669	0.567225
DIS3L	0	0	1.39088e-144	0	0.0582125	0.598449	0.426769	0.0766675	0.00839777	-0.000178359	6.76708e-05	0.570802
EDC3	0	0	9.57159e-145	0	0.059051	0.60226	0.417069	0.072426	0.00844009	0.000245401	9.31674e-05	0.571585
UBA2	0	0	1.00076e-144	0	0.0575906	0.606853	0.423623	0.0758581	0.00850648	-0.000264498	0.000100519	0.573965
SNX7	0	0	1.02883e-144	0	0.0592625	0.610901	0.415822	0.0701035	0.0085509	0.000131613	5.00517e-05	0.573965
POTEE	0	0	1.3394e-144	0	0.058377	0.604443	0.423478	0.0761508	0.00856803	0.000121774	4.6322e-05	0.573965
CAV1	0	0	9.11966e-145	0	0.0581911	0.598918	0.424356	0.0731369	0.00867897	0.000381819	0.000145483	0.579305
CD5	0	0	1.16913e-144	0	0.0568661	0.597875	0.419007	0.0784035	0.00876933	-0.000159074	6.06929e-05	0.58213
C22orf31	0	0	6.59255e-145	0	0.0586889	0.597834	0.417529	0.078263	0.00881175	-0.000196842	7.51502e-05	0.58213
C10orf76	0	0	8.68536e-145	0	0.058827	0.607929	0.420977	0.0699394	0.00891509	-0.000179711	6.87143e-05	0.58213
ITIH2	0	0	1.21168e-144	0	0.0605914	0.595557	0.421489	0.0750813	0.00891624	-0.000124145	4.74689e-05	0.58213
HEXDC	0	0	1.01929e-144	0	0.0591088	0.606131	0.418302	0.0837938	0.00894121	0.000182346	6.97487e-05	0.58213
RBMXL1	0	0	1.10077e-144	0	0.0614339	0.599278	0.413674	0.0771349	0.00895923	0.000136082	5.20661e-05	0.58213
OR4F5	0	0	8.27456e-145	0	0.0597472	0.604278	0.419601	0.0753731	0.00901572	-0.000249731	9.56276e-05	0.58213
NPR3	0	0	1.04819e-144	0	0.0593074	0.600608	0.418652	0.0767577	0.00903649	-0.000145569	5.57583e-05	0.58213
CD84	0	0	1.03487e-144	0	0.0594449	0.598187	0.410611	0.0792563	0.0090429	0.000368033	0.000140984	0.58213
SPRY4	0	0	9.7788e-145	0	0.0611609	0.591699	0.414516	0.0783604	0.00905547	0.000110079	4.21759e-05	0.58213
PCP4L1	0	0	9.89647e-145	0	0.0599654	0.597574	0.419463	0.0776454	0.00906637	0.000498627	0.000191076	0.58213
TMEM55A	0	0	1.31779e-144	0	0.0590499	0.607602	0.41621	0.0760138	0.00914175	-0.00036797	0.000141161	0.584946
YY2	0	0	7.70464e-145	0	0.0592782	0.600935	0.423139	0.074285	0.00920599	-0.00115936	0.000445165	0.585795
U2AF2	0	0	1.02399e-144	0	0.0600712	0.602175	0.410224	0.0756239	0.00922267	-0.000738284	0.000283549	0.585795
ANGEL2	0	0	8.9329e-145	0	0.0573308	0.602302	0.418359	0.0744967	0.00924972	0.000289749	0.000111325	0.585795
PCDHA9	0	0	1.42349e-144	0	0.0580633	0.601961	0.425935	0.0771608	0.00944908	0.000146222	5.63387e-05	0.596385
SLC41A3	0	0	1.07412e-144	0	0.0604418	0.601784	0.424759	0.0740909	0.00951753	-0.000185366	7.14891e-05	0.598669
INA	0	0	1.13854e-144	0	0.0592675	0.604769	0.420369	0.0794868	0.00955366	-0.000300146	0.000115814	0.598748
CENPT	0	0	1.16721e-144	0	0.0596856	0.595685	0.413761	0.0750623	0.00958332	-0.000122493	4.72845e-05	0.598748
KIAA0368	0	0	6.97911e-145	0	0.0605348	0.60384	0.420717	0.0724835	0.00963455	0.000133556	5.15915e-05	0.599929
AP5B1	0	0	1.12835e-144	0	0.0590842	0.603022	0.420279	0.0781537	0.00968514	0.000124917	4.8288e-05	0.600718
PGM1	0	0	1.26413e-144	0	0.0603894	0.599818	0.418346	0.0771395	0.00971197	-0.000165602	6.40389e-05	0.600718
FBLN7	0	0	8.96588e-145	0	0.0580508	0.606729	0.420264	0.0753035	0.00984641	-0.000129235	5.00674e-05	0.605256
MUC21	0	0	1.32378e-144	0	0.0607133	0.619037	0.415602	0.0738788	0.0098986	-0.000503203	0.000195086	0.605256
ATG7	0	0	1.16271e-144	0	0.0586478	0.605294	0.421214	0.0800267	0.00993619	0.000139873	5.42548e-05	0.605256
BBS2	0	0	9.55368e-145	0	0.0581334	0.605634	0.41594	0.0742791	0.00994199	0.000132939	5.15691e-05	0.605256
XG	0	0	1.13394e-144	0	0.0604021	0.585031	0.419331	0.0788374	0.00994843	0.00108437	0.000420681	0.605256
HSPB1	0	0	8.70342e-145	0	0.0605792	0.599012	0.41825	0.081274	0.0100393	-0.000281798	0.000109457	0.608787
PITPNM1	0	0	1.06264e-144	0	0.0599743	0.61127	0.420758	0.0723014	0.0101894	-9.44618e-05	3.67646e-05	0.615877
POLE	0	0	1.02482e-144	0	0.0578297	0.599687	0.422515	0.0778044	0.0103205	-7.28333e-05	2.83957e-05	0.620722
REV3L	0	0	1.29172e-144	0	0.0597636	0.596876	0.416158	0.0761437	0.0103364	-0.000115523	4.50486e-05	0.620722
RTL1	0	0	1.08047e-144	0	0.0585739	0.602342	0.420359	0.0723855	0.0104638	0.000131334	5.12992e-05	0.62523
NDUFA7	0	0	1.19091e-144	0	0.0597329	0.601891	0.420643	0.075669	0.0104789	-0.000366035	0.000143002	0.62523
BCAS3	0	0	1.10408e-144	0	0.059156	0.595876	0.426674	0.0755647	0.0105529	-0.000210264	8.22243e-05	0.627626
SLC11A1	0	0	9.37357e-145	0	0.0607073	0.604576	0.416228	0.0846655	0.0106798	-0.000119064	4.66362e-05	0.632618
MAP3K9	0	0	1.00533e-144	0	0.0604658	0.607499	0.419064	0.0733925	0.0107882	-0.00011165	4.37927e-05	0.632618
HAPLN1	0	0	1.0239e-144	0	0.0578182	0.610262	0.422232	0.0759617	0.0107965	-0.000349323	0.000137029	0.632618
CDC42SE2	0	0	8.99016e-145	0	0.0606426	0.603896	0.415542	0.0765035	0.0108238	0.000931418	0.000365495	0.632618
CFTR	0	0	9.03951e-145	0	0.0593919	0.593483	0.420789	0.0772721	0.0108715	-5.51462e-05	2.16528e-05	0.632618
CD86	0	0	1.01993e-144	0	0.0597941	0.594681	0.423409	0.079572	0.0108995	0.000553753	0.000217504	0.632618
RPS6KA3	0	0	9.22343e-145	0	0.0585818	0.603362	0.414828	0.0776534	0.010989	-0.00124976	0.000491433	0.632618
C12orf49	0	0	1.29972e-144	0	0.0605126	0.601962	0.415777	0.0774513	0.011001	-0.000311094	0.000122348	0.632618
SLC47A2	0	0	8.64192e-145	0	0.0577075	0.598048	0.4256	0.0723449	0.0110069	-0.000138863	5.46164e-05	0.632618
CD80	0	0	9.50135e-145	0	0.0608739	0.599315	0.417243	0.0738223	0.0110176	0.000543167	0.000213662	0.632618
ZDHHC20	0	0	9.21424e-145	0	0.0600377	0.60484	0.413351	0.0753054	0.0110513	0.000123511	4.8605e-05	0.632618
COQ8B	0	0	6.7559e-145	0	0.0608393	0.597652	0.424112	0.0766866	0.0110763	0.000112085	4.41224e-05	0.632618
DHX38	0	0	7.40641e-145	0	0.0581942	0.601785	0.419578	0.0742182	0.0110951	-0.000113307	4.46137e-05	0.632618
TNFSF13B	0	0	1.13249e-144	0	0.0600724	0.604256	0.41661	0.0781294	0.0111142	0.00102298	0.000402885	0.632618
ITGB6	0	0	1.42141e-144	0	0.0600408	0.611088	0.420581	0.0795322	0.0111967	0.000130608	5.14909e-05	0.632618
ARL4C	0	0	7.33239e-145	0	0.0613602	0.608783	0.420265	0.0768389	0.0111973	0.00126162	0.000497385	0.632618
TTC17	0	0	1.30069e-144	0	0.0576142	0.600985	0.429101	0.0747466	0.0112272	-0.000182119	7.18252e-05	0.632618
ZNF446	0	0	1.30379e-144	0	0.0596671	0.602327	0.419929	0.072378	0.0113105	-0.000203721	8.04271e-05	0.632618
NPRL3	0	0	1.08588e-144	0	0.0595716	0.609203	0.42226	0.0772775	0.0113718	0.000142939	5.64733e-05	0.632618
ABCA8	0	0	7.55107e-145	0	0.0601983	0.602736	0.421276	0.0716449	0.0113733	-8.78539e-05	3.47105e-05	0.632618
TTC26	0	0	1.4661e-144	0	0.0606615	0.599393	0.417088	0.0722648	0.0114361	-0.000175983	6.95829e-05	0.632618
MEPE	0	0	8.30253e-145	0	0.0592366	0.601191	0.421131	0.0795476	0.0114575	0.00028685	0.000113448	0.632618
HEXIM1	0	0	1.22064e-144	0	0.0596387	0.605591	0.415703	0.0792819	0.0114716	0.000488393	0.000193191	0.632618
RBM27	0	0	1.11242e-144	0	0.0612691	0.612342	0.420281	0.0751774	0.0114865	0.000193128	7.64084e-05	0.632618
KAT7	0	0	9.27985e-145	0	0.0591692	0.60038	0.417412	0.075561	0.0114908	-0.00041201	0.000163015	0.632618
PLA2G2A	0	0	1.06462e-144	0	0.0606022	0.592941	0.426887	0.0723919	0.0115232	0.000312487	0.000123686	0.632618
TSPAN31	0	0	9.9826e-145	0	0.057922	0.599154	0.421861	0.0744933	0.0116483	-0.000322853	0.000127981	0.637599
MTAP	0	0	8.00542e-145	0	0.060315	0.603286	0.416235	0.0731559	0.0117074	-0.000342317	0.000135793	0.63895
SHISA2	0	0	8.82535e-145	0	0.0611996	0.6095	0.415923	0.0725148	0.0118155	0.000213531	8.4814e-05	0.640713
RTCA	0	0	8.02466e-145	0	0.0606778	0.603816	0.410757	0.0730571	0.0119377	-0.000162164	6.4504e-05	0.640713
OAZ1	0	0	9.92009e-145	0	0.0608087	0.606311	0.419391	0.075004	0.0119654	0.000193301	7.69146e-05	0.640713
RBM14	0	0	9.56187e-145	0	0.0588217	0.605326	0.416816	0.0800219	0.0120104	-0.000264416	0.000105266	0.640713
ACTG2	0	0	9.7815e-145	0	0.0581596	0.60209	0.420177	0.0761397	0.0120168	-0.000510752	0.00020335	0.640713
FAM187A	0	0	9.74448e-145	0	0.0584363	0.601722	0.424059	0.0809959	0.0120728	-0.00018448	7.34966e-05	0.640713
ZNF410	0	0	8.20176e-145	0	0.058268	0.59546	0.422001	0.0770707	0.0121132	-0.00037777	0.000150574	0.640713
MSN	0	0	7.42662e-145	0	0.0590192	0.601144	0.419149	0.076292	0.0121232	0.000570382	0.000227373	0.640713
NAT14	0	0	6.89e-145	0	0.0591944	0.606038	0.418157	0.0766164	0.0121303	0.000295301	0.000117726	0.640713
GDF5	0	0	1.50351e-144	0	0.0590202	0.600287	0.420837	0.0737554	0.0121733	-0.000592533	0.00023634	0.640713
PHF3	0	0	8.3674e-145	0	0.0596931	0.599553	0.425845	0.0769825	0.0121768	0.000125909	5.02225e-05	0.640713
GPR139	0	0	8.72227e-145	0	0.0599733	0.60069	0.412548	0.0780122	0.0122656	-0.000416389	0.00016626	0.640713
SAMD8	0	0	7.55748e-145	0	0.0581955	0.608749	0.420278	0.0739221	0.0123233	-0.000524633	0.00020962	0.640713
CSNK1G3	0	0	1.04993e-144	0	0.06064	0.60585	0.418931	0.0751625	0.0124245	-0.000360787	0.000144321	0.640713
DAPK3	0	0	8.30915e-145	0	0.0604723	0.604572	0.417659	0.0769453	0.0124526	-0.000236472	9.46236e-05	0.640713
ACOT7	0	0	1.04692e-144	0	0.0584931	0.600886	0.413309	0.0740943	0.0124534	-0.000327186	0.000130923	0.640713
TEX13A	0	0	1.0562e-144	0	0.0594395	0.598041	0.417133	0.0764694	0.0124767	0.000533294	0.000213454	0.640713
KRTAP1-4	0	0	1.49409e-144	0	0.0585585	0.596217	0.417338	0.0788687	0.0125237	-0.000480159	0.000192289	0.640713
SLC24A2	0	0	8.87902e-145	0	0.0586637	0.601576	0.41974	0.0783616	0.0125476	0.000168779	6.76092e-05	0.640713
ASB6	0	0	1.05069e-144	0	0.0610899	0.595676	0.423903	0.0808843	0.0125538	-0.000164403	6.58609e-05	0.640713
DKK1	0	0	7.11845e-145	0	0.0596302	0.603211	0.422364	0.0769684	0.0126164	0.000135751	5.4421e-05	0.640713
ZNF268	0	0	7.04975e-145	0	0.0595334	0.598945	0.41385	0.075665	0.0126294	9.98353e-05	4.00288e-05	0.640713
ZNF830	0	0	1.11736e-144	0	0.0600312	0.604837	0.414298	0.0755808	0.0126373	-0.000266934	0.000107036	0.640713
CAPN13	0	0	8.74151e-145	0	0.0601975	0.60041	0.420107	0.0758046	0.0126513	0.000134021	5.37487e-05	0.640713
SLC1A1	0	0	7.65036e-145	0	0.060073	0.605854	0.42351	0.0749189	0.0126778	-0.00020846	8.36272e-05	0.640713
ATG3	0	0	1.12315e-144	0	0.0593616	0.607125	0.413846	0.073548	0.0126984	0.000331267	0.000132924	0.640713
GPAT3	0	0	8.73866e-145	0	0.0577151	0.59093	0.420707	0.0741031	0.0127236	8.29255e-05	3.32841e-05	0.640713
ALPK1	0	0	9.36188e-145	0	0.060687	0.601911	0.418252	0.0816317	0.0127481	-0.00011584	4.65076e-05	0.640713
AP1G1	0	0	1.09666e-144	0	0.0592587	0.604808	0.416315	0.0741367	0.0127583	0.000353947	0.00014212	0.640713
PROP1	0	0	1.23106e-144	0	0.05802	0.602909	0.416544	0.078467	0.0127932	-0.000276113	0.000110911	0.640713
XBP1	0	0	9.84282e-145	0	0.060114	0.606237	0.420577	0.0734248	0.0128101	0.000223052	8.96136e-05	0.640713
INPP4B	0	0	1.09841e-144	0	0.0598732	0.609919	0.424456	0.0735292	0.0129957	-0.000170243	6.8538e-05	0.642663
MME	0	0	1.29153e-144	0	0.0613959	0.596266	0.418843	0.0806499	0.0130937	0.000140708	5.67087e-05	0.642663
PSMC3IP	0	0	8.94291e-145	0	0.0598466	0.602463	0.419923	0.0787633	0.0131086	-0.000277613	0.000111903	0.642663
SMIM18	0	0	8.40056e-145	0	0.0610231	0.602944	0.422118	0.0768165	0.0131604	-0.000834706	0.000336652	0.642663
KIF11	0	0	9.68804e-145	0	0.0585102	0.59494	0.423436	0.0772931	0.0132324	-0.00039243	0.000158399	0.642663
FAM208A	0	0	9.60088e-145	0	0.0595935	0.606077	0.420247	0.0786099	0.0132396	0.000181894	7.34247e-05	0.642663
KIF2A	0	0	1.0935e-144	0	0.0612194	0.60233	0.42469	0.0773259	0.0133156	-0.000327641	0.000132367	0.642663
PRPF4	0	0	1.01985e-144	0	0.0602925	0.607736	0.419952	0.0748187	0.0133232	-0.000278938	0.0001127	0.642663
FAM71A	0	0	1.03466e-144	0	0.0598956	0.60135	0.415339	0.0788534	0.0133318	8.39093e-05	3.39053e-05	0.642663
JAML	0	0	1.04286e-144	0	0.0596543	0.592624	0.412988	0.0788744	0.0133347	0.000155886	6.29911e-05	0.642663
IFNA7	0	0	9.84101e-145	0	0.0595393	0.605053	0.419705	0.0800898	0.0133461	0.000328647	0.000132817	0.642663
CRYBB1	0	0	9.84258e-145	0	0.0594132	0.604063	0.422879	0.077369	0.0133538	0.000243035	9.82269e-05	0.642663
COL17A1	0	0	1.13878e-144	0	0.0572321	0.602756	0.418036	0.0762893	0.0133948	-9.55363e-05	3.86297e-05	0.642663
SNAI1	0	0	7.77499e-145	0	0.0593492	0.610322	0.423355	0.0728054	0.0134155	-0.000406825	0.000164535	0.642663
DENND5B	0	0	7.39885e-145	0	0.0599527	0.603105	0.427632	0.0707024	0.0134269	0.000185198	7.49099e-05	0.642663
GNS	0	0	8.40055e-145	0	0.0602505	0.601564	0.422551	0.0773451	0.0134464	-0.000323114	0.000130722	0.642663
ERLIN2	0	0	8.9342e-145	0	0.0595992	0.599244	0.420832	0.07546	0.0134773	0.000490146	0.000198365	0.642663
HSPA6	0	0	1.26186e-144	0	0.0587273	0.606458	0.417974	0.0754306	0.0134853	0.000169738	6.86997e-05	0.642663
NR1I2	0	0	8.40472e-145	0	0.0605459	0.608574	0.425859	0.0765524	0.0135241	0.000222019	8.98973e-05	0.642663
DUSP1	0	0	1.53584e-144	0	0.0611205	0.595506	0.412944	0.0714503	0.0135802	0.000227001	9.19698e-05	0.642663
JRK	0	0	8.00066e-145	0	0.060105	0.609185	0.41577	0.0797194	0.0135962	0.000829603	0.000336172	0.642663
SLC26A1	0	0	7.79071e-145	0	0.0596039	0.60561	0.417624	0.0754705	0.0136398	0.000104565	4.23916e-05	0.642663
MRPL42	0	0	8.37207e-145	0	0.0593397	0.604016	0.425834	0.0784923	0.0136457	-0.000403938	0.00016377	0.642663
TREH	0	0	1.07113e-144	0	0.0594017	0.604255	0.418871	0.0736626	0.0136927	-9.90492e-05	4.0178e-05	0.643247
ACSBG2	0	0	1.21387e-144	0	0.0609445	0.597518	0.420277	0.077425	0.0137616	-0.000197667	8.02397e-05	0.644154
AVEN	0	0	8.16915e-145	0	0.0597938	0.599198	0.421847	0.0728098	0.0137815	-0.000178281	7.23856e-05	0.644154
DLX3	0	0	1.32285e-144	0	0.0593739	0.596146	0.418514	0.0726432	0.0138303	0.000299534	0.000121679	0.644811
GJA4	0	0	7.69096e-145	0	0.0604615	0.604321	0.420112	0.0755812	0.0139119	0.000169658	6.89788e-05	0.646561
SCN2B	0	0	1.30935e-144	0	0.0595867	0.600139	0.42702	0.078156	0.0139939	0.000330987	0.000134687	0.646561
ACTN4	0	0	1.01446e-144	0	0.0603443	0.597847	0.415915	0.0741575	0.0140325	0.000136728	5.56606e-05	0.646561
NGEF	0	0	1.00123e-144	0	0.0587423	0.598487	0.42798	0.0750128	0.0140395	-0.000115609	4.70667e-05	0.646561
PEBP1	0	0	1.1923e-144	0	0.0599399	0.610054	0.417919	0.0789689	0.014042	0.00021515	8.75941e-05	0.646561
NUDC	0	0	1.26894e-144	0	0.0591709	0.599502	0.421158	0.0758685	0.0142146	-0.000295317	0.000120448	0.649324
ABCA5	0	0	9.45873e-145	0	0.0590137	0.595926	0.423733	0.078377	0.0142251	-0.000111507	4.54839e-05	0.649324
TMEM254	0	0	1.1824e-144	0	0.0614968	0.594276	0.417769	0.0796923	0.0142706	0.000453096	0.000184906	0.649324
HSPB2	0	0	1.10291e-144	0	0.0600462	0.600745	0.421176	0.07608	0.0142812	0.000119284	4.86846e-05	0.649324
SLC28A3	0	0	1.08472e-144	0	0.059513	0.606487	0.41553	0.0764252	0.014285	0.0002022	8.2529e-05	0.649324
PCNT	0	0	1.08422e-144	0	0.0582372	0.605274	0.419779	0.0698811	0.0143457	7.40382e-05	3.02379e-05	0.649324
OR13J1	0	0	6.75312e-145	0	0.0585124	0.609922	0.4178	0.0784854	0.0143711	-0.000332329	0.000135762	0.649324
APOBR	0	0	1.08659e-144	0	0.0600929	0.602945	0.421354	0.0733616	0.014382	-0.000315478	0.000128892	0.649324
SSC5D	0	0	9.2031e-145	0	0.0600884	0.603261	0.420524	0.0704743	0.0145533	-0.000105404	4.31391e-05	0.652255
FAM159A	0	0	1.0883e-144	0	0.0587212	0.593285	0.421568	0.0758161	0.0145716	-0.000222169	9.09453e-05	0.652255
CECR2	0	0	1.25815e-144	0	0.0599545	0.599069	0.416161	0.0776091	0.014586	0.000108166	4.42844e-05	0.652255
DMRTC2	0	0	9.15007e-145	0	0.0602142	0.610505	0.418837	0.0772387	0.0146218	0.000183382	7.51058e-05	0.652255
SPTBN5	0	0	9.08032e-145	0	0.0601742	0.60542	0.421376	0.0764897	0.0146226	5.73587e-05	2.3492e-05	0.652255
SCCPDH	0	0	1.31677e-144	0	0.0598983	0.606279	0.41272	0.0757502	0.0146606	0.000255491	0.00010468	0.652379
SESN2	0	0	7.66558e-145	0	0.0594372	0.595107	0.418329	0.074035	0.0148278	-0.000129866	5.32981e-05	0.657176
DKKL1	0	0	8.411e-145	0	0.0587468	0.609658	0.421884	0.0727973	0.0148494	-0.000223552	9.17679e-05	0.657176
GPAM	0	0	1.03342e-144	0	0.0589454	0.603678	0.419498	0.0787353	0.0148961	-0.000226998	9.32259e-05	0.657176
YPEL3	0	0	8.92587e-145	0	0.0592438	0.595343	0.418119	0.0738098	0.0149101	-0.00047865	0.000196604	0.657176
HMCN2	0	0	1.17397e-144	0	0.0586767	0.608018	0.421882	0.0715205	0.0150958	-6.15612e-05	2.53327e-05	0.663785
CLSTN3	0	0	1.31572e-144	0	0.0586456	0.605485	0.419633	0.072497	0.0152095	-0.00014526	5.98422e-05	0.663997
NMNAT1	0	0	1.35822e-144	0	0.0593799	0.604024	0.418754	0.0765659	0.0152452	0.000313448	0.000129175	0.663997
ZNF697	0	0	1.2223e-144	0	0.0597005	0.595116	0.421576	0.080467	0.0152486	-0.00025361	0.000104519	0.663997
DHX40	0	0	9.31726e-145	0	0.0593035	0.601755	0.422351	0.074631	0.0152755	0.000286519	0.000118113	0.663997
RLN2	0	0	9.37071e-145	0	0.0614654	0.602313	0.422401	0.0759762	0.0152795	-0.000713676	0.000294212	0.663997
SLC9A3R1	0	0	9.63312e-145	0	0.0590666	0.608939	0.422022	0.0755494	0.0153527	9.25985e-05	3.8201e-05	0.664666
OR10H2	0	0	1.13333e-144	0	0.0597647	0.5985	0.421941	0.077861	0.0153666	-0.000265931	0.000109723	0.664666
LRRC10	0	0	1.19946e-144	0	0.0601844	0.59575	0.419912	0.0795436	0.0155157	-0.000156125	6.45106e-05	0.667727
TRMT61A	0	0	7.29203e-145	0	0.0591948	0.596349	0.421389	0.074681	0.0155236	-0.000369158	0.000152547	0.667727
INTS6L	0	0	9.6324e-145	0	0.0580261	0.598966	0.415443	0.0792911	0.0155453	0.000367368	0.000151839	0.667727
TMEM217	0	0	8.71561e-145	0	0.0597455	0.599161	0.416746	0.0785097	0.0155904	-0.000491223	0.000203119	0.66812
CXCR1	0	0	1.20059e-144	0	0.0606526	0.607096	0.420105	0.0724704	0.015715	-0.00017012	7.04286e-05	0.669524
KCNH6	0	0	1.32858e-144	0	0.0592826	0.600252	0.418127	0.0733574	0.0157184	-0.000106215	4.39736e-05	0.669524
ZNF417	0	0	8.72341e-145	0	0.057982	0.597934	0.42196	0.0727335	0.0157314	0.000110145	4.56066e-05	0.669524
VEGFA	0	0	9.85159e-145	0	0.0595387	0.603717	0.419216	0.074241	0.0158593	-0.000217704	9.02524e-05	0.673422
NCF2	0	0	1.01167e-144	0	0.0601696	0.600216	0.422343	0.0830437	0.0159423	-8.64191e-05	3.58546e-05	0.673432
GALNT15	0	0	1.30863e-144	0	0.0598311	0.598867	0.420365	0.0776713	0.0160329	-0.000178237	7.40126e-05	0.673432
UGT1A5	0	0	1.26216e-144	0	0.05865	0.595729	0.425139	0.0771732	0.016043	0.000273918	0.000113755	0.673432
ARHGEF15	0	0	8.04455e-145	0	0.0574609	0.597351	0.418719	0.0821576	0.0160644	0.000127213	5.28406e-05	0.673432
KIAA1524	0	0	7.92126e-145	0	0.0581863	0.605103	0.423404	0.074764	0.0160849	-0.000149938	6.2292e-05	0.673432
NKTR	0	0	1.28123e-144	0	0.0610822	0.606545	0.422545	0.0780948	0.0160871	0.000134881	5.6038e-05	0.673432
GOLGA6B	0	0	1.06548e-144	0	0.0595356	0.605285	0.421168	0.0758513	0.0161136	-0.000172358	7.16261e-05	0.673432
PWWP2A	0	0	1.36204e-144	0	0.0598575	0.611336	0.421292	0.0767855	0.0162184	0.000316751	0.000131761	0.676289
RBCK1	0	0	9.22263e-145	0	0.0588281	0.599982	0.424432	0.0739567	0.0162759	-0.000220946	9.19574e-05	0.677166
UPK3A	0	0	1.23805e-144	0	0.0585334	0.602577	0.417545	0.0776275	0.01637	0.000244047	0.000101661	0.679556
CHP1	0	0	1.05249e-144	0	0.0599845	0.602119	0.419685	0.0759536	0.0165415	-0.000612533	0.000255566	0.68378
CLEC1B	0	0	1.13861e-144	0	0.0593481	0.593282	0.424306	0.0744106	0.0166116	-0.00033253	0.000138831	0.68378
AIPL1	0	0	1.13255e-144	0	0.0592651	0.604037	0.417372	0.0781603	0.0166643	0.000106492	4.44816e-05	0.68378
LHFPL5	0	0	9.37338e-145	0	0.0590858	0.598017	0.420508	0.0761065	0.0166912	0.000239857	0.000100213	0.68378
NPAS2	0	0	9.81389e-145	0	0.0584343	0.599496	0.423593	0.0726561	0.016709	-0.000178696	7.4672e-05	0.68378
ANGEL1	0	0	1.04575e-144	0	0.0582062	0.596897	0.422704	0.0731537	0.0167489	-0.000103213	4.31455e-05	0.68378
RILPL1	0	0	8.06375e-145	0	0.0599494	0.603577	0.414444	0.0748528	0.016755	0.000235481	9.84426e-05	0.68378
KIF1C	0	0	8.11298e-145	0	0.0592313	0.605447	0.414871	0.0787726	0.0167665	-6.69162e-05	2.79771e-05	0.68378
TGS1	0	0	1.07439e-144	0	0.059441	0.600985	0.419558	0.0739652	0.0168634	0.000169534	7.09435e-05	0.685509
PSMA5	0	0	9.6309e-145	0	0.0593293	0.599313	0.419547	0.077559	0.0168828	0.00121344	0.000507869	0.685509
C6orf223	0	0	1.07258e-144	0	0.0603169	0.598789	0.420477	0.0797049	0.0169723	0.000557469	0.000233511	0.687639
DNA2	0	0	1.06e-144	0	0.0598651	0.603213	0.418768	0.0749679	0.0171033	-0.000129682	5.4385e-05	0.689724
ZNF302	0	0	1.20616e-144	0	0.060038	0.603664	0.424218	0.0781685	0.0171364	-0.000181631	7.61941e-05	0.689724
SACS	0	0	1.04471e-144	0	0.0600853	0.602491	0.425881	0.0715711	0.017148	-6.3085e-05	2.64668e-05	0.689724
C14orf80	0	0	1.06764e-144	0	0.0601334	0.601167	0.4131	0.0829117	0.0171725	-0.000127605	5.35476e-05	0.689724
RCN1	0	0	9.60714e-145	0	0.0604263	0.597218	0.42466	0.07132	0.0172551	-0.00034071	0.00014308	0.691546
OAS1	0	0	9.18507e-145	0	0.0595758	0.600275	0.419531	0.076023	0.0173658	-0.000242331	0.000101867	0.693086
KDSR	0	0	8.80594e-145	0	0.0612773	0.60395	0.427978	0.0765293	0.0173682	0.000223347	9.38889e-05	0.693086
PNRC1	0	0	1.09391e-144	0	0.0601045	0.614011	0.417015	0.0781059	0.0175124	0.000259937	0.000109411	0.69734
CDK9	0	0	9.40213e-145	0	0.0581949	0.604304	0.421286	0.0762611	0.0177792	-0.000375992	0.000158632	0.7063
SNX13	0	0	1.4715e-144	0	0.0589806	0.597793	0.421785	0.0782158	0.017845	-0.000128831	5.43854e-05	0.7063
LMF1	0	0	7.83558e-145	0	0.0583384	0.604277	0.421381	0.0709318	0.0178516	-0.000134719	5.68746e-05	0.7063
TMEM106A	0	0	1.22145e-144	0	0.0598782	0.608767	0.417746	0.0739119	0.0179406	0.000256765	0.000108483	0.707799
NID1	0	0	9.74078e-145	0	0.0582794	0.600899	0.425072	0.0706367	0.0179822	-7.8485e-05	3.31718e-05	0.707799
EIF4A1	0	0	1.20989e-144	0	0.0582705	0.608292	0.414181	0.07677	0.0180039	-0.000635108	0.00026848	0.707799
SHANK1	0	0	1.07716e-144	0	0.0590478	0.612328	0.418383	0.0789897	0.0182448	-0.000135847	5.75465e-05	0.709809
RAD21L1	0	0	8.87289e-145	0	0.0606451	0.605218	0.416463	0.0779964	0.0182928	0.000246766	0.000104577	0.709809
FOXA3	0	0	1.36368e-144	0	0.060127	0.59876	0.423452	0.0750766	0.0183264	-0.000301003	0.000127599	0.709809
TBC1D14	0	0	1.49825e-144	0	0.0606777	0.598795	0.41327	0.0778563	0.0184575	0.00015988	6.7851e-05	0.709809
TMPRSS6	0	0	8.57241e-145	0	0.0582434	0.605066	0.421021	0.0747036	0.0184944	-0.000104522	4.43717e-05	0.709809
KNDC1	0	0	1.06342e-144	0	0.0588872	0.598406	0.419237	0.0761935	0.0185088	0.000125625	5.33368e-05	0.709809
MRPS11	0	0	9.30219e-145	0	0.0594787	0.604579	0.422331	0.0757638	0.018539	-0.000239162	0.000101568	0.709809
MYH14	0	0	1.13463e-144	0	0.0595417	0.59715	0.418562	0.0780983	0.0185402	6.32532e-05	2.68628e-05	0.709809
SEPHS2	0	0	1.24183e-144	0	0.0583101	0.602667	0.416639	0.0750849	0.0185832	0.000367001	0.000155917	0.709809
FMR1	0	0	8.5264e-145	0	0.0590377	0.604474	0.416011	0.0754048	0.018631	0.000507996	0.000215906	0.709809
DEFA6	0	0	9.8669e-145	0	0.0588379	0.599276	0.420087	0.0721047	0.0186846	-0.000167207	7.10978e-05	0.709809
TTYH2	0	0	1.12674e-144	0	0.0589311	0.60738	0.416664	0.0750753	0.0186986	-0.000121369	5.1613e-05	0.709809
IL9	0	0	1.32461e-144	0	0.058813	0.601627	0.415995	0.07616	0.0187017	-0.000699962	0.000297672	0.709809
GPANK1	0	0	6.66974e-145	0	0.0589896	0.601499	0.424704	0.0755027	0.018726	-0.000135557	5.76601e-05	0.709809
TRAPPC4	0	0	9.11082e-145	0	0.0603269	0.608945	0.42035	0.0772911	0.0187394	-0.000251243	0.00010688	0.709809
RBM11	0	0	9.8926e-145	0	0.0596443	0.599971	0.415767	0.075212	0.0187418	0.000155142	6.59993e-05	0.709809
PRAMEF19	0	0	8.55562e-145	0	0.0595572	0.601188	0.423116	0.0751563	0.0188389	0.000515485	0.000219474	0.709809
ST6GALNAC5	0	0	1.07658e-144	0	0.0595679	0.600788	0.416181	0.0753376	0.0188833	0.000209974	8.94323e-05	0.709809
EPSTI1	0	0	1.07479e-144	0	0.0599957	0.597932	0.413379	0.0764234	0.0188933	0.000362127	0.00015425	0.709809
SCN3A	0	0	1.1228e-144	0	0.0592403	0.603902	0.415214	0.0758709	0.0189365	0.000134504	5.73138e-05	0.709809
CCDC54	0	0	1.21683e-144	0	0.0601607	0.596651	0.421728	0.0768899	0.0189599	0.000305176	0.000130064	0.709809
BCORL1	0	0	8.02684e-145	0	0.059967	0.598737	0.422119	0.0752271	0.0190375	-0.000208481	8.89112e-05	0.709809
ANKRD52	0	0	1.15549e-144	0	0.0596985	0.602965	0.416402	0.0731299	0.0190433	-0.000185573	7.91455e-05	0.709809
PRM3	0	0	8.06328e-145	0	0.059357	0.60134	0.421336	0.0716463	0.0190986	-0.00014535	6.20193e-05	0.709809
SERTM1	0	0	1.5292e-144	0	0.0590151	0.604119	0.425021	0.0749315	0.0191607	0.00142171	0.000606942	0.709809
C16orf70	0	0	7.4234e-145	0	0.0593374	0.604763	0.422428	0.0784475	0.0191647	0.000205915	8.79099e-05	0.709809
NCR3	0	0	9.3116e-145	0	0.0596917	0.602262	0.416306	0.0766112	0.0191863	0.000156794	6.69511e-05	0.709809
FAM129B	0	0	8.24764e-145	0	0.0616258	0.601581	0.421869	0.0760703	0.0192842	0.000110679	4.72985e-05	0.709809
ZNF281	0	0	1.10297e-144	0	0.0595432	0.605411	0.417	0.0768808	0.0192918	0.000316384	0.000135214	0.709809
ENTPD5	0	0	1.39533e-144	0	0.0585453	0.6075	0.423443	0.0769243	0.0193316	-0.000155999	6.66918e-05	0.709809
AGTPBP1	0	0	8.45729e-145	0	0.059689	0.601743	0.41521	0.0789971	0.019337	0.000196399	8.39674e-05	0.709809
LRRC59	0	0	1.04784e-144	0	0.0589031	0.612436	0.421078	0.0755341	0.0193838	-0.000261016	0.000111636	0.709809
SCRT1	0	0	1.40024e-144	0	0.059315	0.596825	0.422206	0.0763389	0.0194727	0.0003024	0.000129431	0.709809
MAMDC2	0	0	8.46301e-145	0	0.0593417	0.605636	0.424808	0.0750708	0.0194755	-0.00011831	5.06391e-05	0.709809
C6orf15	0	0	1.12485e-144	0	0.0607564	0.603137	0.413847	0.0770229	0.0194851	0.000262769	0.00011248	0.709809
SLC25A45	0	0	1.17491e-144	0	0.058013	0.599093	0.417412	0.0800686	0.0194876	-0.000110728	4.73989e-05	0.709809
CDX4	0	0	8.86838e-145	0	0.0585652	0.597339	0.414028	0.0769394	0.019497	-0.000579816	0.000248218	0.709809
CYP2R1	0	0	1.03178e-144	0	0.0588702	0.604191	0.417999	0.0753206	0.0195121	0.000183252	7.84595e-05	0.709809
C11orf24	0	0	9.5746e-145	0	0.058721	0.605549	0.419743	0.0753035	0.0195723	0.000371355	0.000159074	0.709809
AKAP8	0	0	1.31785e-144	0	0.0595454	0.60212	0.41814	0.0779947	0.0196361	-6.24303e-05	2.67567e-05	0.709809
APOB	0	0	9.01992e-145	0	0.0583236	0.59962	0.416811	0.0786007	0.0198287	6.34313e-05	2.72284e-05	0.709809
RASIP1	0	0	1.46518e-144	0	0.0592214	0.605902	0.420263	0.0760873	0.0198288	0.000113187	4.85863e-05	0.709809
BTBD2	0	0	1.07809e-144	0	0.058519	0.609294	0.422883	0.0794406	0.0198442	0.000145344	6.2398e-05	0.709809
ZSWIM2	0	0	1.11598e-144	0	0.0588968	0.600075	0.423101	0.0737119	0.019858	0.000145825	6.26115e-05	0.709809
PPAT	0	0	7.19512e-145	0	0.0583019	0.602069	0.420694	0.0768917	0.0198699	-0.000186775	8.02015e-05	0.709809
SP2	0	0	8.77803e-145	0	0.0594684	0.60466	0.418332	0.075347	0.019875	-0.000262157	0.000112575	0.709809
MKRN2OS	0	0	9.31449e-145	0	0.0594756	0.604338	0.419987	0.077339	0.0199514	0.000324023	0.000139228	0.709809
PLCZ1	0	0	7.74608e-145	0	0.0598062	0.605073	0.416506	0.0773459	0.0199629	0.000236742	0.000101734	0.709809
FARSB	0	0	6.98492e-145	0	0.0603901	0.606888	0.42024	0.0785321	0.0199803	0.000195444	8.39989e-05	0.709809
C16orf86	0	0	1.17988e-144	0	0.0594139	0.60432	0.418375	0.0763128	0.0200206	0.000405897	0.000174505	0.709809
TXNDC15	0	0	1.14756e-144	0	0.0594315	0.596612	0.42365	0.0777697	0.020088	0.000201424	8.66442e-05	0.709809
VEZF1	0	0	1.30409e-144	0	0.060261	0.602671	0.413204	0.0747451	0.0200946	-0.000536116	0.000230627	0.709809
LCOR	0	0	1.01215e-144	0	0.0591679	0.604634	0.424265	0.077134	0.0200951	-0.000195828	8.42417e-05	0.709809
SHISA5	0	0	7.98885e-145	0	0.0582645	0.608584	0.420295	0.0760529	0.0201207	0.00023361	0.000100516	0.709809
C8orf76	0	0	1.0215e-144	0	0.0593117	0.601679	0.419436	0.0785612	0.0202176	0.000517615	0.000222888	0.710539
CT62	0	0	1.04754e-144	0	0.0596175	0.598653	0.423368	0.0756606	0.020293	0.000575239	0.00024785	0.710539
P2RY4	0	0	9.42661e-145	0	0.0592093	0.602791	0.422725	0.0765539	0.0203215	0.000175611	7.56818e-05	0.710539
POLG2	0	0	1.05629e-144	0	0.0593695	0.601148	0.414595	0.0741074	0.0203464	-0.000244205	0.000105264	0.710539
PICALM	0	0	8.53608e-145	0	0.059778	0.597766	0.425477	0.0746537	0.0203534	-0.000243247	0.000104857	0.710539
AMDHD1	0	0	9.08889e-145	0	0.0583393	0.597263	0.421959	0.074982	0.0203926	0.000180087	7.76546e-05	0.710539
RABGGTB	0	0	9.43494e-145	0	0.0594236	0.601058	0.415855	0.0769345	0.0204462	0.000400928	0.000172957	0.710539
RPUSD3	0	0	1.06347e-144	0	0.0593153	0.600085	0.418973	0.074645	0.0205233	-0.000231396	9.98832e-05	0.710539
EFNA3	0	0	1.1988e-144	0	0.0601066	0.601573	0.422878	0.0743193	0.0205449	-0.00068979	0.000297802	0.710539
IAH1	0	0	1.53729e-144	0	0.0597775	0.602906	0.424425	0.0759987	0.0206261	-0.000156448	6.75863e-05	0.710539
DUSP16	0	0	1.1309e-144	0	0.0595498	0.593487	0.411451	0.0789972	0.0206588	0.000212055	9.16325e-05	0.710539
TFF2	0	0	1.33188e-144	0	0.0582979	0.605155	0.417322	0.0779697	0.0206718	0.000348703	0.000150696	0.710539
WDR92	0	0	1.07675e-144	0	0.0600198	0.596354	0.422595	0.0785802	0.0206766	0.000272172	0.000117626	0.710539
TSSK1B	0	0	1.33926e-144	0	0.0599648	0.601543	0.417172	0.0732107	0.0207218	0.000153584	6.63992e-05	0.710539
SPATA25	0	0	9.71154e-145	0	0.0587515	0.601425	0.422725	0.0754137	0.0207772	-0.000162172	7.01427e-05	0.710539
GIMAP8	0	0	8.63715e-145	0	0.0590234	0.605281	0.412933	0.0788348	0.0208075	0.000163672	7.08079e-05	0.710539
CCKAR	0	0	9.65519e-145	0	0.0587907	0.603292	0.422798	0.0739419	0.0208291	0.000204716	8.85796e-05	0.710539
CHRNG	0	0	9.82851e-145	0	0.0611188	0.603053	0.420122	0.0757513	0.0208399	0.000101238	4.38088e-05	0.710539
PAPD7	0	0	8.9933e-145	0	0.0583814	0.602386	0.418181	0.0766557	0.02088	-0.000344817	0.00014926	0.710539
CCDC58	0	0	1.16068e-144	0	0.0599012	0.598187	0.425114	0.0733895	0.0209353	-0.000405964	0.000175805	0.710539
NECAB3	0	0	1.02894e-144	0	0.0592126	0.601215	0.420754	0.0707498	0.02097	-0.000168626	7.30439e-05	0.710539
FAM177B	0	0	9.22593e-145	0	0.0590269	0.596633	0.416226	0.0772149	0.0209838	-0.000425323	0.000184258	0.710539
JPH2	0	0	1.11191e-144	0	0.0572563	0.608053	0.42073	0.0776183	0.0210314	-0.000181288	7.85664e-05	0.710853
UBE3B	0	0	8.92638e-145	0	0.0579961	0.610067	0.419612	0.0763515	0.0211953	-0.000145134	6.29783e-05	0.712391
FARP2	0	0	9.18182e-145	0	0.058291	0.602707	0.41565	0.0796177	0.0212048	-0.000100871	4.37744e-05	0.712391
KCNQ2	0	0	1.04464e-144	0	0.0598064	0.602474	0.423321	0.0781187	0.0212345	0.000268465	0.000116531	0.712391
RFX5	0	0	1.21566e-144	0	0.0598928	0.596206	0.417228	0.0751015	0.0212597	-0.000212219	9.21343e-05	0.712391
MED1	0	0	1.35136e-144	0	0.0605099	0.603802	0.420251	0.0753019	0.0212689	-0.000170983	7.42372e-05	0.712391
SLC6A20	0	0	7.13553e-145	0	0.0585551	0.608294	0.418405	0.0760172	0.0213297	-0.000143024	6.21268e-05	0.713141
MBOAT7	0	0	7.78232e-145	0	0.0589896	0.607322	0.422	0.0723313	0.0214309	0.00016657	7.24115e-05	0.714621
TTC9B	0	0	1.13176e-144	0	0.0588736	0.599333	0.415856	0.0788486	0.0215001	-0.000404878	0.000176102	0.714621
LUZP6	0	0	1.38988e-144	0	0.0588876	0.606506	0.41976	0.0763594	0.0216173	0.00253071	0.00110172	0.714621
SRSF3	0	0	7.76426e-145	0	0.058656	0.607641	0.419379	0.0779547	0.0216178	-0.0015389	0.000669949	0.714621
FBXL18	0	0	8.76442e-145	0	0.05874	0.613309	0.421578	0.0744442	0.021622	-0.000207216	9.02129e-05	0.714621
AARD	0	0	8.20828e-145	0	0.0599077	0.598825	0.425191	0.0778494	0.0216375	0.000430413	0.000187405	0.714621
OR7A5	0	0	6.11556e-145	0	0.0594516	0.60787	0.420133	0.0694633	0.0216775	-0.000214507	9.34266e-05	0.714621
UBE3C	0	0	9.8901e-145	0	0.0596288	0.598625	0.413095	0.0762974	0.021682	-0.00020492	8.92538e-05	0.714621
RBM22	0	0	1.07411e-144	0	0.0573166	0.602088	0.418547	0.0771396	0.0218286	-0.000542741	0.000236657	0.717399
SLIRP	0	0	1.22667e-144	0	0.0588757	0.598391	0.425526	0.0772261	0.0218436	0.000269298	0.000117438	0.717399
TCP10L	0	0	1.34699e-144	0	0.0598828	0.602946	0.413852	0.0776427	0.0219333	0.0021446	0.000935873	0.717484
OR11H4	0	0	1.05233e-144	0	0.0597892	0.603352	0.416258	0.0784016	0.0219356	-0.000134516	5.87018e-05	0.717484
RILPL2	0	0	1.13958e-144	0	0.0606387	0.600941	0.42157	0.0769721	0.0219987	0.000333026	0.0001454	0.717484
SRF	0	0	7.73756e-145	0	0.0585619	0.602175	0.417863	0.076629	0.0220029	0.000151278	6.60505e-05	0.717484
ARPP19	0	0	8.90692e-145	0	0.0582231	0.605146	0.414909	0.0767826	0.02208	-0.000713199	0.000311575	0.717484
TXNDC2	0	0	1.14366e-144	0	0.0584297	0.596265	0.417671	0.0809901	0.0222048	0.000163172	7.13515e-05	0.717484
PDE4A	0	0	1.2033e-144	0	0.0581815	0.595508	0.414757	0.0753463	0.0222061	-0.000201015	8.79004e-05	0.717484
DDX19B	0	0	1.39542e-144	0	0.0590683	0.602796	0.424138	0.0792138	0.0222235	-0.000219323	9.59188e-05	0.717484
TK2	0	0	1.07913e-144	0	0.0586674	0.604161	0.420767	0.0786955	0.0223153	0.000178583	7.81552e-05	0.717484
PXDC1	0	0	1.27916e-144	0	0.0590419	0.606087	0.418818	0.0748173	0.0223357	-0.000380915	0.000166729	0.717484
CARD10	0	0	9.7193e-145	0	0.0602596	0.603311	0.419558	0.0794087	0.0223719	0.000111855	4.89729e-05	0.717484
PITHD1	0	0	1.0456e-144	0	0.0595754	0.61168	0.417651	0.077045	0.0223758	0.000419958	0.000183873	0.717484
AK4	0	0	7.56266e-145	0	0.0596137	0.603157	0.420472	0.0752983	0.0224021	-0.000365075	0.000159875	0.717484
TM4SF1	0	0	9.04528e-145	0	0.0592427	0.605635	0.421553	0.0755377	0.0225142	0.000317701	0.000139245	0.717484
MYDGF	0	0	1.1617e-144	0	0.0595793	0.601673	0.42389	0.0749432	0.0225528	0.000355249	0.000155746	0.717484
CNN2	0	0	1.02262e-144	0	0.0611969	0.60453	0.420335	0.0766357	0.0225673	-0.000267009	0.000117073	0.717484
FBXO38	0	0	1.23091e-144	0	0.0588756	0.600068	0.421881	0.079966	0.0226128	-0.000132042	5.79148e-05	0.717484
ZFP82	0	0	1.04877e-144	0	0.0600437	0.603349	0.424352	0.0765189	0.0227108	0.00035184	0.000154431	0.717484
GFRAL	0	0	1.1849e-144	0	0.0596811	0.609612	0.416381	0.0809746	0.0227134	0.000170718	7.49337e-05	0.717484
RNF123	0	0	1.2387e-144	0	0.0592035	0.60063	0.423435	0.0792583	0.0227244	-8.58246e-05	3.76744e-05	0.717484
HIST1H2AA	0	0	1.01101e-144	0	0.0585649	0.59411	0.422239	0.0763086	0.0227821	0.00059081	0.000259457	0.717484
SYNGR4	0	0	9.27592e-145	0	0.05953	0.607728	0.424281	0.0726454	0.0228059	0.000230786	0.000101369	0.717484
TBC1D13	0	0	9.72404e-145	0	0.0589414	0.609515	0.418115	0.0786387	0.0228396	0.000256313	0.000112609	0.717484
FEM1C	0	0	1.1587e-144	0	0.0595115	0.595269	0.410908	0.0786886	0.022842	-0.000507624	0.000223024	0.717484
ADRB3	0	0	1.05218e-144	0	0.0605734	0.598858	0.41856	0.0781426	0.0229156	0.000255041	0.000112112	0.717484
CCDC85B	0	0	7.83403e-145	0	0.0592898	0.600477	0.418406	0.0791477	0.0229537	0.000527196	0.000231813	0.717484
AMIGO2	0	0	1.03764e-144	0	0.0608991	0.605955	0.425423	0.0739747	0.0229805	-0.000431268	0.00018967	0.717484
CCT5	0	0	1.13077e-144	0	0.0589012	0.601873	0.417042	0.0758215	0.0230021	-0.000209255	9.2044e-05	0.717484
MUTYH	0	0	8.8579e-145	0	0.0595884	0.602346	0.422881	0.0709631	0.0230021	9.68486e-05	4.26003e-05	0.717484
NXN	0	0	1.01378e-144	0	0.0590485	0.609862	0.421192	0.0759618	0.0230426	-0.00023692	0.000104244	0.717484
LYPD2	0	0	1.13517e-144	0	0.0596645	0.606662	0.414189	0.0774025	0.0230694	-0.00044595	0.000196254	0.717484
BUB1	0	0	1.32342e-144	0	0.0577404	0.602466	0.423008	0.0750297	0.02313	0.000125604	5.53003e-05	0.717484
PAPLN	0	0	9.63833e-145	0	0.0608048	0.606382	0.422724	0.0779956	0.0231431	6.40441e-05	2.81997e-05	0.717484
CNOT9	0	0	8.77008e-145	0	0.060545	0.599758	0.417947	0.0775271	0.0232159	0.000608726	0.000268174	0.717484
SLC25A1	0	0	9.0953e-145	0	0.0578488	0.601556	0.42633	0.0773208	0.0232388	0.000242927	0.000107039	0.717484
PTPN9	0	0	8.21687e-145	0	0.0589531	0.602592	0.417846	0.0769496	0.0232604	-0.000241554	0.000106451	0.717484
CERS2	0	0	9.87342e-145	0	0.0588603	0.602727	0.427231	0.077984	0.0232992	-0.00022911	0.000100995	0.717484
MYCT1	0	0	1.0593e-144	0	0.0593934	0.598544	0.431687	0.0719462	0.0233155	-0.000107193	4.72579e-05	0.717484
APC	0	0	9.6287e-145	0	0.060149	0.606249	0.422168	0.0729603	0.0233553	-7.65184e-05	3.37442e-05	0.717518
R3HCC1	0	0	1.04015e-144	0	0.0597507	0.597378	0.413553	0.0778268	0.023552	-0.000249908	0.000110365	0.720904
PDGFRB	0	0	9.77545e-145	0	0.0606535	0.60737	0.414378	0.07523	0.0235769	-0.00011836	5.22794e-05	0.720904
RHEB	0	0	8.85797e-145	0	0.059028	0.603766	0.420384	0.077219	0.0236031	-0.00148169	0.000654585	0.720904
PDZD2	0	0	1.1498e-144	0	0.0596177	0.601206	0.415132	0.0780133	0.0236209	-7.62301e-05	3.36815e-05	0.720904
CECR6	0	0	8.22975e-145	0	0.0590853	0.600484	0.425678	0.0782923	0.0237337	-0.000127999	5.66008e-05	0.723158
ELOC	0	0	1.24467e-144	0	0.0602207	0.597191	0.424025	0.0832008	0.0238194	-0.00137902	0.000610172	0.723274
SAMD4A	0	0	9.23487e-145	0	0.0600538	0.598627	0.422788	0.0768261	0.0238274	-0.000111785	4.94642e-05	0.723274
SLC7A13	0	0	1.62208e-144	0	0.0596299	0.606057	0.419134	0.0720918	0.0238545	-0.000146922	6.50245e-05	0.723274
FLT3LG	0	0	7.11904e-145	0	0.0606681	0.601744	0.425064	0.0732267	0.0239291	0.000464731	0.000205789	0.724354
ADAMTS14	0	0	8.2763e-145	0	0.0585001	0.592529	0.419833	0.0741334	0.0240359	-5.57301e-05	2.46967e-05	0.724922
PIBF1	0	0	1.0308e-144	0	0.0589108	0.597422	0.412327	0.0756	0.0240815	-0.000107815	4.77935e-05	0.724922
IRS2	0	0	1.23311e-144	0	0.0594536	0.601923	0.415824	0.0756406	0.0240878	-0.000156252	6.92684e-05	0.724922
TRIM54	0	0	9.1627e-145	0	0.058728	0.599967	0.429007	0.0791679	0.0241042	0.000148918	6.60245e-05	0.724922
H1FNT	0	0	1.12625e-144	0	0.0595253	0.604143	0.417302	0.0743345	0.0244232	0.000329431	0.000146386	0.728687
TRMT10B	0	0	1.28902e-144	0	0.0602275	0.605647	0.419454	0.0803722	0.0244627	-0.000112325	4.99264e-05	0.728687
AGPAT5	0	0	1.0614e-144	0	0.0602319	0.604169	0.414323	0.0767611	0.0244737	0.000288738	0.000128349	0.728687
COMMD6	0	0	9.47637e-145	0	0.0587562	0.606294	0.423824	0.0750925	0.024509	0.00044961	0.000199908	0.728687
CCDC92	0	0	1.33594e-144	0	0.060021	0.600255	0.416139	0.0753467	0.0245113	0.000217125	9.65411e-05	0.728687
ABCC4	0	0	1.03213e-144	0	0.0593778	0.604231	0.421034	0.0775098	0.0246086	9.09154e-05	4.04515e-05	0.728687
PTEN	0	0	1.52785e-144	0	0.0586577	0.598246	0.427582	0.0745996	0.0246193	-0.000581696	0.000258837	0.728687
ACTR6	0	0	1.09246e-144	0	0.0579055	0.610487	0.420242	0.0770059	0.0246425	0.000260668	0.000116008	0.728687
PARP6	0	0	1.36828e-144	0	0.0594247	0.600932	0.418112	0.076533	0.0246507	-0.000318464	0.000141738	0.728687
SYCE2	0	0	1.09767e-144	0	0.0570583	0.609393	0.414568	0.0752549	0.0246511	0.000196209	8.7326e-05	0.728687
RGL1	0	0	1.08491e-144	0	0.0592741	0.600555	0.41924	0.0770967	0.0246854	-0.000118703	5.28436e-05	0.728687
FBXL14	0	0	1.19324e-144	0	0.0601121	0.594521	0.420255	0.0792567	0.0247546	-0.000298695	0.000133035	0.728687
HAMP	0	0	9.39252e-145	0	0.0602283	0.600885	0.421555	0.0778414	0.0247703	-0.000353546	0.000157482	0.728687
LONRF3	0	0	8.04465e-145	0	0.0603985	0.593094	0.422135	0.0747352	0.0247906	-0.000319941	0.000142533	0.728687
HYPK	0	0	1.30007e-144	0	0.0590024	0.596839	0.419137	0.0769707	0.0248339	0.000387658	0.000172753	0.728687
POLR1A	0	0	1.34438e-144	0	0.0592877	0.605257	0.418995	0.0737594	0.0249475	-0.000102157	4.556e-05	0.728687
SUSD1	0	0	1.01347e-144	0	0.0607906	0.601562	0.417692	0.0784457	0.0249533	-9.13148e-05	4.07264e-05	0.728687
SGIP1	0	0	1.07117e-144	0	0.0594755	0.603014	0.415735	0.0746991	0.0250339	-0.000150646	6.72254e-05	0.728687
CRYZL1	0	0	1.03305e-144	0	0.0577613	0.608838	0.422029	0.0723957	0.0250462	-0.000144718	6.45857e-05	0.728687
CTNNAL1	0	0	1.02034e-144	0	0.0598548	0.603492	0.412714	0.0796493	0.0250541	-0.000154304	6.88673e-05	0.728687
HIST1H3B	0	0	9.64698e-145	0	0.0605259	0.60665	0.42212	0.0752285	0.0250623	-0.00078098	0.000348579	0.728687
ADH6	0	0	9.69454e-145	0	0.0592772	0.603325	0.421623	0.0794026	0.0251609	0.000283129	0.000126456	0.728687
SPRR2E	0	0	9.54105e-145	0	0.0604789	0.598468	0.419279	0.0757799	0.0251656	-0.000901376	0.000402602	0.728687
AMMECR1	0	0	1.27278e-144	0	0.0591713	0.601229	0.417281	0.0772682	0.025184	0.000492642	0.000220068	0.728687
SLC46A2	0	0	9.24829e-145	0	0.0598024	0.600971	0.41828	0.0742396	0.0252111	-0.000121876	5.44533e-05	0.728687
NBEAL2	0	0	1.02701e-144	0	0.0599831	0.59452	0.419882	0.0794487	0.0253079	-7.44264e-05	3.32752e-05	0.729627
PHACTR4	0	0	1.057e-144	0	0.0597353	0.592371	0.421464	0.0750206	0.0254039	-0.000165564	7.40702e-05	0.729627
ELF5	0	0	9.29388e-145	0	0.0589367	0.600812	0.424714	0.0762164	0.0254485	0.000313807	0.000140434	0.729627
OR13D1	0	0	1.31764e-144	0	0.0587783	0.595761	0.416868	0.0763765	0.0255731	0.000130601	5.84955e-05	0.729627
SEM1	0	0	1.06825e-144	0	0.0614218	0.604336	0.417315	0.076723	0.0255943	0.000566103	0.000253592	0.729627
DQX1	0	0	8.70969e-145	0	0.0595601	0.60243	0.418527	0.0797648	0.0255981	0.000132979	5.95707e-05	0.729627
DHX30	0	0	1.01409e-144	0	0.0591994	0.607701	0.424642	0.0764969	0.0256455	-0.000294016	0.000131753	0.729627
SHOX2	0	0	1.16581e-144	0	0.0597742	0.608941	0.41859	0.074319	0.025649	-0.000313038	0.000140281	0.729627
OR52I2	0	0	7.63882e-145	0	0.0605957	0.609	0.423911	0.0752211	0.0256561	-0.000468935	0.000210153	0.729627
SKA3	0	0	7.47845e-145	0	0.0587889	0.602107	0.417165	0.0783208	0.0256578	0.000144193	6.46208e-05	0.729627
DNAJC18	0	0	1.36088e-144	0	0.0597504	0.600325	0.416242	0.0736414	0.0256994	-0.000193623	8.67974e-05	0.729627
OR1I1	0	0	1.17213e-144	0	0.0602889	0.599799	0.417194	0.0776863	0.0257155	0.000298412	0.000133787	0.729627
ASCL2	0	0	1.0434e-144	0	0.0586394	0.602177	0.419964	0.0772839	0.0258154	0.000272974	0.000122465	0.731343
TTC27	0	0	1.21129e-144	0	0.0585812	0.607413	0.422503	0.0770412	0.0260503	-0.000103131	4.63408e-05	0.733289
DYNLRB2	0	0	6.50315e-145	0	0.0590915	0.599405	0.421846	0.0765895	0.0260544	-0.000357815	0.000160785	0.733289
HELQ	0	0	1.05929e-144	0	0.0595664	0.596873	0.421435	0.0753935	0.026113	-0.000175615	7.89438e-05	0.733289
FZD6	0	0	1.38507e-144	0	0.0578221	0.603723	0.425799	0.0778836	0.0261184	-0.000142044	6.3855e-05	0.733289
RRM1	0	0	1.10236e-144	0	0.059092	0.607445	0.423887	0.076023	0.0261329	-0.000175425	7.88692e-05	0.733289
TXNRD2	0	0	9.99868e-145	0	0.0598725	0.606783	0.420772	0.0783569	0.0261556	0.000123074	5.53412e-05	0.733289
TRAPPC6A	0	0	8.95806e-145	0	0.055902	0.599201	0.420788	0.0787454	0.0262396	-0.000181106	8.14811e-05	0.733289
CD300LF	0	0	1.03211e-144	0	0.0591413	0.601966	0.421544	0.0777324	0.0262612	0.000321869	0.000144832	0.733289
ADNP	0	0	1.02697e-144	0	0.0577862	0.605252	0.420276	0.07697	0.0262873	-0.000281906	0.000126872	0.733289
CSRNP2	0	0	1.0991e-144	0	0.0594628	0.603442	0.417184	0.0787323	0.0263665	-0.000233402	0.000105098	0.733289
SMDT1	0	0	9.73047e-145	0	0.0608235	0.595562	0.420351	0.0746956	0.026381	0.000410101	0.000184682	0.733289
WBP1	0	0	7.92572e-145	0	0.0603113	0.596373	0.417858	0.0744697	0.026403	0.000334356	0.000150593	0.733289
BAK1	0	0	9.73449e-145	0	0.0607277	0.604693	0.419101	0.0757289	0.0264417	0.000244185	0.000110009	0.733289
SLC4A5	0	0	1.27087e-144	0	0.0588315	0.603805	0.418335	0.0786846	0.0264931	-0.000120312	5.42206e-05	0.733289
IL17RB	0	0	1.01407e-144	0	0.0583444	0.58885	0.432792	0.0747968	0.0266371	-0.000106778	4.81674e-05	0.733289
C19orf47	0	0	1.02374e-144	0	0.0585234	0.602688	0.416729	0.0785408	0.0266682	0.000138846	6.26457e-05	0.733289
FIBIN	0	0	8.97208e-145	0	0.0578703	0.603132	0.41382	0.0776256	0.0266751	0.000119719	5.40184e-05	0.733289
XKR8	0	0	1.09971e-144	0	0.0593287	0.604495	0.425036	0.0780639	0.0266764	-0.000233921	0.000105548	0.733289
KANSL1	0	0	9.47886e-145	0	0.060903	0.605994	0.424898	0.0735761	0.0267012	-0.00013763	6.21108e-05	0.733289
ADCYAP1R1	0	0	1.33712e-144	0	0.060708	0.601137	0.416571	0.0752273	0.0268091	-0.000170277	7.68983e-05	0.733289
DRD3	0	0	9.35799e-145	0	0.059872	0.603857	0.419013	0.0767398	0.0268148	0.000285653	0.000129008	0.733289
COL6A1	0	0	9.79241e-145	0	0.0587452	0.595116	0.4153	0.0743805	0.0268191	-9.75508e-05	4.40576e-05	0.733289
PIGX	0	0	7.89854e-145	0	0.0580889	0.603057	0.427316	0.075327	0.0268323	-0.000252311	0.000113963	0.733289
PDE7A	0	0	7.29828e-145	0	0.0596229	0.602572	0.417053	0.0780315	0.0268592	0.000210826	9.5242e-05	0.733289
GK5	0	0	1.11429e-144	0	0.0601878	0.598847	0.42155	0.0732215	0.0268785	-0.000332045	0.000150022	0.733289
ZNF844	0	0	9.04965e-145	0	0.0603038	0.59489	0.421239	0.0727399	0.0269115	0.000209072	9.4482e-05	0.733289
TNFSF10	0	0	8.63025e-145	0	0.0592717	0.596558	0.417876	0.0738652	0.0269868	-0.000384677	0.000173926	0.734263
ZFAND4	0	0	1.03191e-144	0	0.0590036	0.595762	0.414801	0.0797723	0.0271233	0.000106152	4.80376e-05	0.736011
NAA30	0	0	7.85625e-145	0	0.0583037	0.597964	0.416175	0.0778465	0.0271433	0.000494278	0.000223709	0.736011
SIGLECL1	0	0	1.13737e-144	0	0.0600521	0.603389	0.421011	0.0756029	0.0271701	-0.000583669	0.000264212	0.736011
NOTCH3	0	0	9.01432e-145	0	0.0592666	0.599917	0.423192	0.074941	0.0272708	8.34e-05	3.77778e-05	0.737479
CXCR4	0	0	1.01702e-144	0	0.0581345	0.596621	0.422451	0.0749197	0.0273221	-0.000408747	0.000185212	0.737479
KRT32	0	0	1.18082e-144	0	0.0602748	0.604775	0.420442	0.0747984	0.0273435	0.000145197	6.58011e-05	0.737479
ATP1B1	0	0	9.63822e-145	0	0.0584675	0.601617	0.420983	0.0782222	0.0275673	0.00074827	0.000339596	0.741889
ESYT1	0	0	1.02916e-144	0	0.0607612	0.602947	0.419989	0.0732592	0.0275897	-9.54251e-05	4.33141e-05	0.741889
LY6G6C	0	0	1.16357e-144	0	0.0586297	0.603699	0.41744	0.0747862	0.0276269	-0.000127805	5.80256e-05	0.741889
H2BFM	0	0	6.26347e-145	0	0.0585584	0.605778	0.421475	0.0749408	0.027815	-0.000380549	0.000172984	0.743684
THEMIS2	0	0	9.83619e-145	0	0.0598634	0.600036	0.421428	0.0754933	0.0281055	-0.000210429	9.58311e-05	0.743684
C11orf71	0	0	7.44746e-145	0	0.0582153	0.608145	0.412671	0.0776755	0.028122	-0.000634737	0.000289095	0.743684
MAEL	0	0	1.11412e-144	0	0.060224	0.606074	0.420794	0.0738709	0.0281315	-0.000133861	6.09716e-05	0.743684
ADAM19	0	0	1.2114e-144	0	0.0600999	0.606422	0.420238	0.0783983	0.0281363	8.88426e-05	4.04675e-05	0.743684
SCGB2A1	0	0	9.76894e-145	0	0.0599819	0.608802	0.427614	0.075946	0.0281581	-0.000625224	0.000284827	0.743684
FADS6	0	0	9.05878e-145	0	0.0589401	0.602916	0.422835	0.0729972	0.0281734	0.000141774	6.45928e-05	0.743684
HMGB4	0	0	1.00114e-144	0	0.059731	0.607386	0.417162	0.0724005	0.0282291	-0.000128487	5.85599e-05	0.743684
ARFGAP3	0	0	9.92922e-145	0	0.0584226	0.609149	0.413436	0.0772527	0.0283172	-0.000158726	7.23823e-05	0.743684
ODF4	0	0	9.8041e-145	0	0.0603669	0.608882	0.415171	0.0744874	0.0283206	0.000691187	0.000315202	0.743684
CBLN2	0	0	1.20709e-144	0	0.058731	0.601899	0.411755	0.0783412	0.0283841	0.000445669	0.00020332	0.743684
CEP164	0	0	8.51041e-145	0	0.0582627	0.60072	0.423911	0.0739319	0.0284558	6.64536e-05	3.03307e-05	0.743684
SELENON	0	0	9.60386e-145	0	0.0598052	0.596952	0.417433	0.0738945	0.028494	-0.000153512	7.00826e-05	0.743684
RFK	0	0	8.63824e-145	0	0.0599626	0.61247	0.423482	0.0770078	0.0285042	0.000416508	0.00019016	0.743684
RBP5	0	0	9.03917e-145	0	0.0604648	0.597429	0.420463	0.0776264	0.0285337	0.000432148	0.000197337	0.743684
HS3ST2	0	0	7.94532e-145	0	0.0582498	0.603489	0.426342	0.0730369	0.0285588	0.000353357	0.000161384	0.743684
EFR3B	0	0	9.81903e-145	0	0.0602169	0.603729	0.415508	0.0745049	0.0286272	-0.00016247	7.42345e-05	0.743684
GLIPR1L2	0	0	1.17641e-144	0	0.059653	0.602462	0.415674	0.0792842	0.0286815	0.00018624	8.51242e-05	0.743684
SMU1	0	0	9.37633e-145	0	0.0600987	0.598116	0.414866	0.0753547	0.02869	-0.000627579	0.000286861	0.743684
SEMA4A	0	0	1.00612e-144	0	0.0579575	0.60675	0.418586	0.0749214	0.0287151	-0.000162129	7.41195e-05	0.743684
C2orf42	0	0	1.02822e-144	0	0.0600207	0.600789	0.425152	0.0780094	0.0287426	0.000178592	8.16598e-05	0.743684
TBL3	0	0	1.18317e-144	0	0.0597627	0.607775	0.421073	0.0798136	0.0287608	-8.69649e-05	3.97686e-05	0.743684
C16orf46	0	0	1.25578e-144	0	0.060389	0.599149	0.420252	0.0732109	0.0287627	0.000212661	9.72498e-05	0.743684
RAB30	0	0	8.40457e-145	0	0.0592033	0.602229	0.426724	0.0772608	0.0287686	-0.00062287	0.000284849	0.743684
SLIT3	0	0	1.19227e-144	0	0.0586722	0.601497	0.417826	0.0761556	0.0287947	-9.06005e-05	4.14399e-05	0.743684
APOC1	0	0	8.34547e-145	0	0.0599117	0.59788	0.424164	0.0752719	0.0287987	-0.000392922	0.000179724	0.743684
PRRT3	0	0	1.00359e-144	0	0.0608609	0.60363	0.425306	0.072857	0.0288262	-0.000150256	6.87395e-05	0.743684
ZNF708	0	0	1.01288e-144	0	0.0588256	0.604605	0.422369	0.0782451	0.0288677	-0.000166658	7.62626e-05	0.743684
GALNTL5	0	0	9.93069e-145	0	0.058775	0.600091	0.417418	0.080157	0.0288776	0.000194036	8.87965e-05	0.743684
PGPEP1	0	0	9.08313e-145	0	0.0593102	0.605065	0.416953	0.0766925	0.0289192	-0.00033188	0.000151917	0.743684
C7orf34	0	0	8.25096e-145	0	0.0586049	0.60175	0.422799	0.0729735	0.0289362	0.000174016	7.96639e-05	0.743684
ZC3H11A	0	0	9.62252e-145	0	0.058143	0.594475	0.419281	0.0786195	0.0291748	-0.000192147	8.80946e-05	0.74878
B3GNT6	0	0	8.79327e-145	0	0.05987	0.607731	0.417597	0.0724469	0.0292369	0.000127816	5.86232e-05	0.749092
DCST1	0	0	9.60184e-145	0	0.0596964	0.603862	0.417675	0.0743238	0.0292677	0.000147363	6.76014e-05	0.749092
CDH17	0	0	9.32024e-145	0	0.0583201	0.594269	0.41783	0.0788035	0.0293618	-0.00016284	7.47446e-05	0.750465
DYSF	0	0	1.10386e-144	0	0.0593093	0.594179	0.41649	0.0766248	0.029505	-5.5705e-05	2.55916e-05	0.750826
C8orf44	0	0	7.8038e-145	0	0.0610086	0.59954	0.42175	0.0704621	0.029574	0.000182399	8.38318e-05	0.750826
GATA5	0	0	1.00865e-144	0	0.0584468	0.60509	0.415215	0.083078	0.029578	9.76484e-05	4.4881e-05	0.750826
LRRC43	0	0	9.38078e-145	0	0.0592163	0.596994	0.422536	0.0823476	0.0295892	-9.89197e-05	4.54684e-05	0.750826
NLRC4	0	0	6.94812e-145	0	0.0605531	0.596304	0.413061	0.0765871	0.0296353	0.000182401	8.38641e-05	0.750826
USP1	0	0	1.07666e-144	0	0.0586883	0.605231	0.420712	0.0785899	0.0297235	-0.000224563	0.000103306	0.750826
GCFC2	0	0	8.22944e-145	0	0.0598364	0.60905	0.411493	0.0792461	0.029754	7.38605e-05	3.39843e-05	0.750826
HACD3	0	0	1.12178e-144	0	0.0599076	0.606707	0.419454	0.075807	0.0297765	-0.000235205	0.000108236	0.750826
CALY	0	0	8.66716e-145	0	0.0602331	0.589622	0.414414	0.0758838	0.0298347	-0.000165991	7.64123e-05	0.750826
HEATR9	0	0	7.2459e-145	0	0.0617983	0.600707	0.419633	0.0746954	0.0299506	0.00016394	7.55216e-05	0.750826
PPA2	0	0	7.62666e-145	0	0.0599891	0.607614	0.420259	0.074257	0.0299574	0.000131015	6.03568e-05	0.750826
MAP4K3	0	0	1.0748e-144	0	0.0593235	0.605988	0.425126	0.0761238	0.0299802	-0.000103476	4.76763e-05	0.750826
LRRC42	0	0	1.48498e-144	0	0.0610085	0.601283	0.420664	0.0784286	0.0300204	0.000168487	7.76495e-05	0.750826
TRRAP	0	0	7.89201e-145	0	0.0588916	0.594418	0.413318	0.0770091	0.0300224	-0.000108741	5.01154e-05	0.750826
SCN9A	0	0	1.01023e-144	0	0.0595677	0.60433	0.426886	0.0722357	0.0300358	-6.87506e-05	3.16876e-05	0.750826
QSER1	0	0	8.85561e-145	0	0.0594864	0.600983	0.416189	0.0728443	0.0300535	0.000123217	5.67976e-05	0.750826
VWF	0	0	1.45774e-144	0	0.0619668	0.596957	0.418926	0.0745788	0.0300638	5.58162e-05	2.57304e-05	0.750826
DPH3	0	0	9.03979e-145	0	0.0589615	0.601743	0.416817	0.0779907	0.0301825	0.000719205	0.000331781	0.751233
FAM120C	0	0	1.06644e-144	0	0.0580518	0.602619	0.417703	0.0779904	0.0302099	-0.000454527	0.000209716	0.751233
SLC12A6	0	0	1.05084e-144	0	0.0597431	0.597964	0.425774	0.0777001	0.0302223	0.000147379	6.80045e-05	0.751233
TSC22D2	0	0	8.26153e-145	0	0.0585418	0.601367	0.423788	0.0757674	0.0302451	-0.000165455	7.6356e-05	0.751233
GSR	0	0	9.55656e-145	0	0.0595382	0.602318	0.414555	0.0799858	0.0303186	-0.000124714	5.75801e-05	0.751233
COPS6	0	0	1.04291e-144	0	0.0592627	0.596061	0.420641	0.076299	0.0303409	-0.000512951	0.00023686	0.751233
TFDP3	0	0	8.88272e-145	0	0.0597265	0.60221	0.415684	0.0758334	0.0303635	0.000384475	0.000177559	0.751233
ZFAND3	0	0	1.0595e-144	0	0.059411	0.595839	0.422153	0.077222	0.0304579	0.000329266	0.000152149	0.751673
GSTA5	0	0	9.61924e-145	0	0.0596848	0.598893	0.415717	0.0793689	0.0304623	0.000168894	7.80455e-05	0.751673
ST8SIA1	0	0	8.62276e-145	0	0.0594122	0.597237	0.423588	0.0752517	0.0306169	0.000261193	0.000120809	0.754216
LCE2C	0	0	1.13551e-144	0	0.0592416	0.599843	0.422776	0.0753534	0.0306466	-0.000585143	0.000270692	0.754216
PPARD	0	0	1.07302e-144	0	0.0615162	0.607984	0.416585	0.0731729	0.0307071	-0.00025637	0.000118642	0.754702
DNAJC1	0	0	1.03632e-144	0	0.0603066	0.610432	0.418848	0.0761542	0.0308118	-0.000166019	7.68776e-05	0.755897
ANKRD27	0	0	7.48885e-145	0	0.0610021	0.599727	0.424839	0.0794716	0.0308372	7.91302e-05	3.66481e-05	0.755897
C15orf39	0	0	9.78635e-145	0	0.0589741	0.605247	0.415909	0.0788002	0.0309712	7.86738e-05	3.64659e-05	0.757527
CPVL	0	0	8.00249e-145	0	0.0591627	0.603674	0.424141	0.0811075	0.0309853	0.000122048	5.6575e-05	0.757527
ZNF483	0	0	9.40313e-145	0	0.0605338	0.599283	0.415924	0.0763128	0.0310949	-0.000420877	0.000195223	0.759207
SETX	0	0	1.12841e-144	0	0.0595004	0.603209	0.419298	0.0751606	0.0311757	8.25813e-05	3.83235e-05	0.759472
MON1B	0	0	8.82029e-145	0	0.0603491	0.602779	0.41914	0.0780941	0.0311876	0.000202413	9.39406e-05	0.759472
LILRB2	0	0	8.65682e-145	0	0.0609103	0.600096	0.422485	0.075652	0.0312568	-0.000131078	6.08585e-05	0.759754
CCDC154	0	0	8.99089e-145	0	0.0591267	0.592764	0.423691	0.0797505	0.0312811	-0.000162024	7.52373e-05	0.759754
OTUD6A	0	0	9.54595e-145	0	0.0609644	0.59935	0.421597	0.0770286	0.0313243	-0.00127554	0.000592461	0.75981
GALNS	0	0	9.8085e-145	0	0.0601289	0.6044	0.423273	0.0783961	0.0313674	-0.000161145	7.48675e-05	0.759861
COG7	0	0	1.065e-144	0	0.0615007	0.595696	0.416673	0.0763205	0.0315305	-0.000149539	6.95421e-05	0.762817
RGS21	0	0	9.94436e-145	0	0.0596209	0.611562	0.41654	0.0790338	0.0316893	-0.000263657	0.000122727	0.76566
NUP88	0	0	9.9209e-145	0	0.0602636	0.598742	0.414921	0.0775168	0.0317451	0.000101408	4.72185e-05	0.766011
IFRD2	0	0	8.9331e-145	0	0.0591995	0.609644	0.418436	0.0770658	0.0318152	7.66608e-05	3.57102e-05	0.766705
ADM5	0	0	7.95936e-145	0	0.058542	0.592972	0.423751	0.0750957	0.0319129	-0.000918548	0.000428123	0.767156
WNT3A	0	0	9.45455e-145	0	0.0601019	0.611572	0.419861	0.0736946	0.0319313	0.000280706	0.000130847	0.767156
NEK9	0	0	1.00403e-144	0	0.0598512	0.604823	0.418029	0.0758905	0.0319579	-0.000130434	6.08095e-05	0.767156
ACBD6	0	0	1.04572e-144	0	0.0586119	0.600712	0.416164	0.0779461	0.0321533	0.000317146	0.000148024	0.767885
CSGALNACT1	0	0	1.61064e-144	0	0.0605886	0.59383	0.41711	0.0800255	0.0321949	8.73421e-05	4.07758e-05	0.767885
MPHOSPH6	0	0	1.02142e-144	0	0.0602613	0.604528	0.42007	0.0754643	0.0322137	0.000441198	0.000205997	0.767885
CDKL3	0	0	1.04874e-144	0	0.0593776	0.602208	0.422222	0.0787196	0.0322313	0.000187309	8.74643e-05	0.767885
SMYD3	0	0	8.43153e-145	0	0.0597027	0.602735	0.419564	0.0787863	0.0322358	-0.00018021	8.41514e-05	0.767885
PLAU	0	0	8.92461e-145	0	0.0590396	0.599391	0.418138	0.0800648	0.032252	0.000111466	5.20554e-05	0.767885
EIF5B	0	0	1.13483e-144	0	0.0586993	0.60562	0.421908	0.0741035	0.0322933	0.000117069	5.46853e-05	0.767885
AGAP6	0	0	1.43917e-144	0	0.0595464	0.598544	0.420627	0.0756396	0.0324399	0.000177393	8.29339e-05	0.767885
NT5C1B	0	0	8.4482e-145	0	0.0599654	0.604073	0.42017	0.0762439	0.0324522	0.000790823	0.000369748	0.767885
TMEFF2	0	0	1.02552e-144	0	0.0596778	0.609795	0.423931	0.0762887	0.0324853	-0.000320312	0.00014979	0.767885
RAB8A	0	0	1.13164e-144	0	0.059012	0.595862	0.418276	0.0751606	0.0325338	-0.000491759	0.000230029	0.767885
PRKDC	0	0	1.0892e-144	0	0.0596211	0.59993	0.427009	0.0727093	0.0325565	-7.83591e-05	3.66587e-05	0.767885
ADRA1D	0	0	1.11707e-144	0	0.0597419	0.602702	0.420859	0.0771019	0.0325655	-0.000121057	5.6637e-05	0.767885
SELENOF	0	0	1.02379e-144	0	0.0591869	0.602435	0.418434	0.076953	0.0325842	-0.000210547	9.85156e-05	0.767885
CHURC1	0	0	9.81992e-145	0	0.0592927	0.601149	0.420052	0.0768684	0.0326091	0.000405565	0.000189792	0.767885
STK38L	0	0	1.22172e-144	0	0.0597494	0.604337	0.416708	0.0733755	0.0327468	-0.00041157	0.000192755	0.768855
KRTAP5-3	0	0	9.58973e-145	0	0.0584868	0.60654	0.421456	0.0751934	0.03278	0.000403027	0.00018879	0.768855
ACAD9	0	0	1.11926e-144	0	0.0588638	0.614051	0.417606	0.0805437	0.0328035	0.000139068	6.51525e-05	0.768855
STAM2	0	0	1.33543e-144	0	0.0597342	0.598956	0.419779	0.0767204	0.0328506	0.000224374	0.000105146	0.768855
OPCML	0	0	1.11978e-144	0	0.0584794	0.597682	0.421749	0.0754164	0.0328574	-0.000233419	0.000109389	0.768855
TMPO	0	0	8.62274e-145	0	0.0592381	0.601128	0.414584	0.0808066	0.0329367	0.000122553	5.74591e-05	0.768911
CATSPER2	0	0	1.02715e-144	0	0.061206	0.601267	0.416875	0.0776136	0.0331587	-0.000187866	8.81925e-05	0.768911
GCA	0	0	1.35703e-144	0	0.0592257	0.604646	0.425869	0.0762609	0.0331667	-7.41887e-05	3.48291e-05	0.768911
HLA-DRB5	0	0	8.81589e-145	0	0.0605865	0.604637	0.414776	0.0739843	0.0331799	-0.000273228	0.000128281	0.768911
HR	0	0	1.00094e-144	0	0.0581868	0.608989	0.42215	0.0794986	0.0332998	-7.82331e-05	3.67555e-05	0.768911
GCNT2	0	0	8.54913e-145	0	0.0589533	0.600986	0.419428	0.0725316	0.0333087	-0.000139277	6.54385e-05	0.768911
TNNT1	0	0	1.14932e-144	0	0.0597211	0.601935	0.416801	0.0785349	0.0333567	0.000306529	0.00014406	0.768911
LAMTOR5	0	0	1.51828e-144	0	0.0583874	0.601916	0.412315	0.0777958	0.0333956	0.000286987	0.000134905	0.768911
KBTBD11	0	0	9.95402e-145	0	0.0591289	0.603396	0.418697	0.0777643	0.0334044	0.000186562	8.77028e-05	0.768911
ZNF565	0	0	9.64949e-145	0	0.0593602	0.604855	0.419301	0.0756965	0.0334303	0.000323667	0.000152178	0.768911
TTLL4	0	0	9.50751e-145	0	0.0587672	0.608538	0.419023	0.0806106	0.0334475	7.54353e-05	3.54707e-05	0.768911
ARHGAP44	0	0	1.38954e-144	0	0.0595041	0.595424	0.420848	0.0752536	0.0334965	-0.000221968	0.000104401	0.768911
ADAM2	0	0	1.17599e-144	0	0.0600405	0.599674	0.422534	0.0773334	0.0336482	-0.000164288	7.73382e-05	0.768911
CPE	0	0	9.73973e-145	0	0.0584426	0.601693	0.422136	0.0788815	0.0337142	0.000145857	6.86874e-05	0.768911
TNNT3	0	0	1.06097e-144	0	0.0590268	0.590926	0.420841	0.0762078	0.0337322	-0.000282786	0.000133184	0.768911
LATS1	0	0	1.10224e-144	0	0.0596134	0.606394	0.420352	0.0744825	0.0337354	0.000107473	5.06173e-05	0.768911
TBX10	0	0	1.06574e-144	0	0.0604355	0.595998	0.412935	0.0775742	0.033791	-0.000169509	7.98599e-05	0.768911
USP28	0	0	8.788e-145	0	0.0591945	0.603419	0.417703	0.0778553	0.0338179	-9.88198e-05	4.65635e-05	0.768911
SELENOW	0	0	1.14671e-144	0	0.0587389	0.607541	0.412708	0.0771807	0.0338234	0.000538195	0.000253603	0.768911
CHRD	0	0	1.32591e-144	0	0.0594362	0.598541	0.41885	0.0718194	0.0338477	0.000120183	5.66393e-05	0.768911
INTS10	0	0	8.68786e-145	0	0.0608515	0.596029	0.420922	0.0765804	0.0338614	0.00012984	6.11949e-05	0.768911
EZR	0	0	1.08871e-144	0	0.0586099	0.601377	0.419684	0.0794208	0.0338883	0.000179032	8.43923e-05	0.768911
SOX21	0	0	9.16371e-145	0	0.0598834	0.599872	0.423312	0.0754685	0.033895	-0.000443582	0.000209104	0.768911
SDK1	0	0	8.52289e-145	0	0.0594879	0.599028	0.422078	0.0760476	0.0338953	6.9695e-05	3.28543e-05	0.768911
CDCA4	0	0	1.17801e-144	0	0.0584046	0.596277	0.417888	0.0823491	0.0338958	0.000110445	5.20639e-05	0.768911
HOXD3	0	0	8.8189e-145	0	0.0589481	0.603404	0.421093	0.0763342	0.0339431	-0.000275486	0.000129899	0.769044
DRAXIN	0	0	9.96724e-145	0	0.0593488	0.605998	0.430362	0.0760673	0.0339928	-9.84215e-05	4.64213e-05	0.769233
LRRIQ1	0	0	7.83497e-145	0	0.0586035	0.601089	0.426217	0.0738726	0.0340399	0.000106279	5.01408e-05	0.76936
ERICH2	0	0	1.09746e-144	0	0.0590668	0.603716	0.421959	0.0736771	0.034299	0.000309948	0.000146439	0.772665
TOM1L1	0	0	1.09646e-144	0	0.0584475	0.603643	0.420874	0.0767127	0.0343423	-0.000242615	0.000114655	0.772665
CCND3	0	0	1.17393e-144	0	0.0588184	0.604122	0.417285	0.0820017	0.034438	-0.000322129	0.000152312	0.772665
SMTNL2	0	0	1.21642e-144	0	0.0601599	0.60547	0.420649	0.0781552	0.034505	-8.52287e-05	4.03136e-05	0.772665
PLCL1	0	0	1.03465e-144	0	0.0591144	0.601239	0.420436	0.0751801	0.0345303	-0.000141451	6.69163e-05	0.772665
CDX2	0	0	1.02765e-144	0	0.0589973	0.598904	0.421219	0.0760505	0.034562	0.000233363	0.000110417	0.772665
NUP62	0	0	9.19594e-145	0	0.0598793	0.603662	0.421731	0.0775488	0.0346231	0.000277612	0.000131398	0.772665
CHST10	0	0	1.02295e-144	0	0.0603765	0.596742	0.418732	0.0758895	0.034646	-0.000225768	0.000106873	0.772665
CFAP43	0	0	1.04901e-144	0	0.0604877	0.605221	0.423013	0.0732803	0.0347176	-7.37834e-05	3.4941e-05	0.772665
AIDA	0	0	7.41612e-145	0	0.0586739	0.599759	0.417164	0.0769858	0.0347424	-0.000403075	0.000190907	0.772665
MEIOC	0	0	1.23218e-144	0	0.0595081	0.602737	0.413974	0.0791902	0.0347501	-0.00015256	7.22597e-05	0.772665
CR2	0	0	1.04309e-144	0	0.0595019	0.606907	0.41422	0.071897	0.0347607	-8.68444e-05	4.11359e-05	0.772665
GPR173	0	0	1.11151e-144	0	0.0577929	0.604606	0.414997	0.0753196	0.0347906	-0.000725433	0.000343675	0.772665
CACNG3	0	0	8.8868e-145	0	0.057978	0.598072	0.420988	0.0754637	0.0348635	-0.000439772	0.000208427	0.772665
SLC29A1	0	0	7.071e-145	0	0.0597498	0.599236	0.416272	0.0780979	0.0348755	0.000145926	6.91652e-05	0.772665
ADSL	0	0	1.13097e-144	0	0.0608747	0.601051	0.424304	0.0765069	0.034881	0.000156864	7.43514e-05	0.772665
CRTAP	0	0	1.17578e-144	0	0.0574637	0.60556	0.421634	0.0756557	0.034894	0.000107835	5.11159e-05	0.772665
CERK	0	0	9.71678e-145	0	0.0598881	0.597375	0.417321	0.0780932	0.0349922	0.000149977	7.11307e-05	0.773363
UQCR10	0	0	1.02344e-144	0	0.0583763	0.603624	0.42524	0.07123	0.0350487	0.000324597	0.000153997	0.773363
SCAF4	0	0	8.9753e-145	0	0.0606895	0.601968	0.425221	0.0734936	0.0351582	-0.000115307	5.47372e-05	0.773363
ATPIF1	0	0	1.23912e-144	0	0.0596307	0.602954	0.421644	0.0784447	0.0351757	0.000466964	0.000221693	0.773363
SLC25A10	0	0	1.09778e-144	0	0.0602871	0.598962	0.419354	0.0792562	0.0352255	-0.000160661	7.62954e-05	0.773363
SMTN	0	0	9.68654e-145	0	0.0601059	0.60882	0.425313	0.0774702	0.0352327	8.83062e-05	4.19368e-05	0.773363
ZBTB33	0	0	1.13386e-144	0	0.0604427	0.602474	0.421279	0.075811	0.0352411	-0.000606242	0.000287919	0.773363
BEX4	0	0	1.1517e-144	0	0.0592403	0.599673	0.416569	0.0779865	0.0353322	-0.000769509	0.00036564	0.773363
ODF2	0	0	1.05826e-144	0	0.0585885	0.599756	0.42277	0.076888	0.0353327	-8.98227e-05	4.26803e-05	0.773363
CARD11	0	0	1.19434e-144	0	0.0599623	0.607264	0.419164	0.0787408	0.0353423	0.00018702	8.88695e-05	0.773363
GPKOW	0	0	7.49548e-145	0	0.0589678	0.605713	0.416972	0.0741241	0.0355618	-0.000193783	9.21932e-05	0.776373
DBP	0	0	1.10717e-144	0	0.0593949	0.610138	0.419322	0.0764805	0.0355636	0.000107098	5.09529e-05	0.776373
PRRG3	0	0	1.04572e-144	0	0.0597294	0.602103	0.429238	0.077419	0.0357105	0.000304959	0.000145202	0.778313
RBBP8NL	0	0	1.0312e-144	0	0.0595055	0.610948	0.422678	0.0756454	0.0357363	-0.000207695	9.89055e-05	0.778313
ZBTB22	0	0	1.09041e-144	0	0.0613545	0.607263	0.419142	0.0791705	0.0359159	0.000319124	0.000152116	0.781307
LIN7B	0	0	8.71154e-145	0	0.0589324	0.598542	0.419742	0.0781889	0.0360244	0.00024415	0.000116447	0.781375
DPYSL2	0	0	9.96104e-145	0	0.0588684	0.601709	0.418505	0.0767427	0.0360282	-0.000266278	0.000127003	0.781375
CREBBP	0	0	1.07097e-144	0	0.0574771	0.605988	0.4157	0.0773229	0.0360453	-0.000105417	5.02838e-05	0.781375
OR56B4	0	0	1.03438e-144	0	0.0600342	0.603889	0.422845	0.0738712	0.036092	-0.000171305	8.17329e-05	0.781473
SPINT3	0	0	1.17034e-144	0	0.0597091	0.605668	0.41725	0.0767428	0.0361851	0.00073604	0.000351355	0.782265
PMAIP1	0	0	9.2538e-145	0	0.0587424	0.600979	0.424966	0.0749711	0.0362364	-0.000935412	0.00044665	0.782265
KCNK6	0	0	1.20781e-144	0	0.0590341	0.60531	0.421395	0.0721549	0.0363626	-0.000225481	0.000107738	0.782265
TRMT2B	0	0	1.05546e-144	0	0.059213	0.597762	0.42676	0.0766576	0.0364047	0.000653824	0.000312476	0.782265
SLC35E4	0	0	9.24401e-145	0	0.0597327	0.598824	0.418509	0.0729229	0.0364144	9.54826e-05	4.56354e-05	0.782265
ADORA2A	0	0	1.06411e-144	0	0.0586357	0.593341	0.41642	0.0743738	0.03648	-0.000368028	0.000175959	0.782265
PEG3	0	0	1.24702e-144	0	0.0598764	0.608762	0.417217	0.0785503	0.0364928	-8.26918e-05	3.95387e-05	0.782265
ZSWIM5	0	0	1.03231e-144	0	0.0586382	0.603802	0.421476	0.0762176	0.0365234	7.56962e-05	3.61997e-05	0.782265
NPVF	0	0	1.13081e-144	0	0.0610937	0.610278	0.414383	0.0772271	0.0365274	-0.000381368	0.000182383	0.782265
HMGCR	0	0	9.43964e-145	0	0.0610015	0.597465	0.416762	0.0777401	0.0365538	0.000211937	0.000101369	0.782265
ELOA	0	0	1.30268e-144	0	0.059854	0.594155	0.42958	0.0763599	0.0366589	-0.0001512	7.23597e-05	0.782265
OR5K3	0	0	1.02418e-144	0	0.0598241	0.613657	0.421649	0.0780438	0.0367986	0.00027688	0.000132605	0.782265
NR5A1	0	0	9.66918e-145	0	0.0604353	0.602384	0.424359	0.0755895	0.0368587	0.000316167	0.000151468	0.782265
RAB11FIP2	0	0	8.36366e-145	0	0.0621066	0.600669	0.425333	0.0733091	0.0369071	-0.000126512	6.06248e-05	0.782265
BARX1	0	0	8.4099e-145	0	0.0592262	0.606005	0.414132	0.0729287	0.0369811	0.00019911	9.54509e-05	0.782265
UBE2F	0	0	9.62463e-145	0	0.0591146	0.604028	0.416967	0.0770961	0.0370395	0.000469694	0.000225235	0.782265
DNAJC3	0	0	1.0852e-144	0	0.0594002	0.593937	0.426403	0.075082	0.0370746	-0.000209284	0.000100378	0.782265
DDX11	0	0	1.21074e-144	0	0.059057	0.60904	0.425229	0.0739867	0.0370784	0.000102035	4.89397e-05	0.782265
EVI2B	0	0	1.0015e-144	0	0.0602577	0.606867	0.41931	0.0741805	0.0370847	0.000372028	0.000178443	0.782265
ZNF641	0	0	8.24459e-145	0	0.0586079	0.606863	0.42231	0.0769052	0.0371471	0.000306027	0.000146834	0.782265
CDK20	0	0	1.19412e-144	0	0.061017	0.597942	0.41735	0.0774764	0.0371527	0.000122658	5.88542e-05	0.782265
SMIM20	0	0	1.07684e-144	0	0.0595419	0.601751	0.418602	0.0753868	0.0372272	-0.000918343	0.000440815	0.782265
ASIP	0	0	9.35268e-145	0	0.0580415	0.603888	0.415176	0.0768074	0.0372674	0.000787662	0.000378167	0.782265
TCFL5	0	0	1.37785e-144	0	0.0605085	0.602015	0.423259	0.0745085	0.0372861	-0.000109162	5.24153e-05	0.782265
SLC16A13	0	0	8.34576e-145	0	0.0590449	0.60537	0.427948	0.077854	0.0374101	0.000239558	0.000115101	0.782265
FREM3	0	0	9.94343e-145	0	0.0593958	0.592995	0.421473	0.0788924	0.0374299	8.36997e-05	4.02197e-05	0.782265
OR2T8	0	0	9.73975e-145	0	0.0603397	0.609717	0.414963	0.076903	0.0374474	0.000281396	0.00013523	0.782265
MAST4	0	0	1.03849e-144	0	0.0590755	0.599361	0.420748	0.0755847	0.0374532	-6.61306e-05	3.17812e-05	0.782265
ACKR3	0	0	9.81403e-145	0	0.0595683	0.599176	0.417888	0.0784686	0.0374616	-0.000159382	7.65993e-05	0.782265
OTUD4	0	0	1.1649e-144	0	0.0599721	0.602605	0.415463	0.0773868	0.0374795	0.000124526	5.9853e-05	0.782265
CFH	0	0	9.12168e-145	0	0.0591803	0.595831	0.423466	0.0756957	0.0375312	-0.0001732	8.32707e-05	0.782265
FRMPD1	0	0	9.42944e-145	0	0.058996	0.606275	0.419457	0.0735194	0.0376434	-6.46171e-05	3.10848e-05	0.782265
ATP5O	0	0	9.37192e-145	0	0.058896	0.595552	0.423265	0.075636	0.0376794	0.000186381	8.96775e-05	0.782265
PDE1B	0	0	7.77235e-145	0	0.0586759	0.617065	0.414059	0.072819	0.0378792	-0.000161616	7.78431e-05	0.782265
C8orf48	0	0	9.35125e-145	0	0.0601577	0.602208	0.420594	0.0763362	0.0378883	-0.000196984	9.48828e-05	0.782265
FZD3	0	0	8.49498e-145	0	0.0578438	0.607796	0.416821	0.076722	0.0380016	-0.000212742	0.000102533	0.782265
POLR3F	0	0	9.17724e-145	0	0.0600874	0.602072	0.416129	0.0755254	0.0380191	-0.000368706	0.000177718	0.782265
MAP7D2	0	0	1.17982e-144	0	0.058413	0.604287	0.418567	0.077308	0.0380926	-0.000316491	0.000152609	0.782265
RBM41	0	0	8.57393e-145	0	0.0592646	0.601634	0.420574	0.0768249	0.0381105	-0.000493226	0.00023785	0.782265
ARNTL2	0	0	1.17434e-144	0	0.0598584	0.600638	0.424299	0.0770196	0.0381768	0.000129161	6.23073e-05	0.782265
PAIP2	0	0	1.09699e-144	0	0.0602408	0.601156	0.419778	0.0718699	0.0381803	0.000487862	0.000235349	0.782265
PRPF4B	0	0	1.2617e-144	0	0.0591408	0.599441	0.418997	0.0771742	0.0383834	0.000166202	8.02613e-05	0.782265
SPATA18	0	0	8.00688e-145	0	0.0591254	0.596563	0.424464	0.0766314	0.0383837	-8.36701e-05	4.04056e-05	0.782265
KLHL5	0	0	8.05665e-145	0	0.0594854	0.613211	0.419793	0.0752504	0.0384082	0.000162069	7.82755e-05	0.782265
GNG4	0	0	9.92339e-145	0	0.0583719	0.606455	0.422973	0.0754646	0.0384959	-0.000533391	0.000257732	0.782265
SLC34A3	0	0	1.11971e-144	0	0.0597505	0.607711	0.4208	0.0747818	0.0385563	-9.63701e-05	4.65801e-05	0.782265
WDCP	0	0	1.08359e-144	0	0.0595504	0.606602	0.417046	0.0774265	0.0385688	-0.000184741	8.92995e-05	0.782265
TMPRSS4	0	0	9.8573e-145	0	0.0597176	0.603094	0.423215	0.0730255	0.0386003	-0.000134411	6.49819e-05	0.782265
DGKK	0	0	1.05268e-144	0	0.0600362	0.603676	0.41712	0.0790447	0.0386349	0.000429232	0.000207552	0.782265
NAGK	0	0	8.02749e-145	0	0.0592309	0.606696	0.414409	0.0780322	0.0386702	0.000135372	6.547e-05	0.782265
MRPL44	0	0	1.29242e-144	0	0.0602051	0.602005	0.416401	0.0785364	0.0387307	0.000254989	0.000123359	0.782265
KDM7A	0	0	9.75925e-145	0	0.0594421	0.598819	0.419445	0.0779335	0.0387975	0.000181682	8.79244e-05	0.782265
OR51I2	0	0	8.04432e-145	0	0.0595588	0.600419	0.4227	0.0746537	0.0388417	-0.000205515	9.94806e-05	0.782265
CDK17	0	0	1.18037e-144	0	0.0599403	0.60327	0.416495	0.0778431	0.038893	0.00022942	0.000111081	0.782265
CLIC6	0	0	8.11364e-145	0	0.0587198	0.596851	0.411321	0.076863	0.0389484	-0.00011357	5.50044e-05	0.782265
OS9	0	0	1.06573e-144	0	0.0597161	0.602715	0.418899	0.0753803	0.0389853	-0.000152024	7.36419e-05	0.782265
RPP25	0	0	8.7208e-145	0	0.0587678	0.602767	0.415907	0.0778305	0.0389986	0.000388605	0.000188257	0.782265
PFKP	0	0	8.9704e-145	0	0.0605557	0.606064	0.420283	0.0783362	0.039	0.00011615	5.62683e-05	0.782265
SIK3	0	0	7.75699e-145	0	0.0592317	0.601904	0.418132	0.0774621	0.0390143	0.000110727	5.36453e-05	0.782265
DDX43	0	0	1.55649e-144	0	0.0595829	0.601603	0.424048	0.0741986	0.0390695	-0.000185072	8.96896e-05	0.782265
AIM2	0	0	1.07939e-144	0	0.0586975	0.610295	0.422162	0.0764861	0.0391147	-0.000236349	0.000114566	0.782265
SPINK6	0	0	1.24174e-144	0	0.0607884	0.593666	0.418392	0.0771832	0.039168	0.00076679	0.000371788	0.782265
GRM8	0	0	8.61503e-145	0	0.0599703	0.604859	0.421073	0.0738139	0.0391774	-0.000145139	7.03761e-05	0.782265
ITGAL	0	0	9.62409e-145	0	0.0587629	0.603086	0.420414	0.0768167	0.039311	-0.000248387	0.000120521	0.782265
IFI27L1	0	0	9.2057e-145	0	0.0594528	0.607144	0.415378	0.0765614	0.0393117	0.000751727	0.000364752	0.782265
OTX1	0	0	8.06627e-145	0	0.060094	0.599374	0.422323	0.0760811	0.0393343	0.000366922	0.000178058	0.782265
ARHGEF33	0	0	9.10136e-145	0	0.0590044	0.593339	0.426877	0.0762054	0.0393434	0.000128541	6.23803e-05	0.782265
ADAM15	0	0	1.14725e-144	0	0.0596481	0.595921	0.413095	0.0753035	0.0393934	-9.70075e-05	4.70893e-05	0.782265
POLRMT	0	0	1.05182e-144	0	0.0596138	0.598053	0.419503	0.0772108	0.0394021	7.72086e-05	3.74802e-05	0.782265
RABIF	0	0	9.7117e-145	0	0.0600363	0.597202	0.422362	0.0751079	0.0394229	-0.000472689	0.000229487	0.782265
BDNF	0	0	1.11041e-144	0	0.0596481	0.598899	0.417958	0.0823074	0.0394352	-0.000220482	0.000107049	0.782265
ACKR2	0	0	1.06908e-144	0	0.0590788	0.598547	0.42013	0.0767278	0.0394425	0.000185418	9.00277e-05	0.782265
GAREM1	0	0	9.44026e-145	0	0.0595192	0.598902	0.424581	0.073601	0.0394463	-0.000195314	9.48348e-05	0.782265
CD302	0	0	1.18085e-144	0	0.0597124	0.60094	0.417543	0.0773957	0.0394934	0.0026604	0.00129207	0.782265
ZCCHC2	0	0	1.26724e-144	0	0.0588015	0.60139	0.415492	0.0777807	0.0395332	-0.000107988	5.24566e-05	0.782265
POTEM	0	0	1.06771e-144	0	0.0600282	0.601024	0.421616	0.0759448	0.0395474	0.000290353	0.000141053	0.782265
FCRL1	0	0	9.00541e-145	0	0.0592374	0.60504	0.42417	0.0768276	0.0395975	-0.000147671	7.17564e-05	0.782265
RPS6KA5	0	0	1.2296e-144	0	0.0594915	0.600161	0.416483	0.0797364	0.039601	0.000147691	7.17674e-05	0.782265
OR6K3	0	0	1.07314e-144	0	0.0577986	0.602962	0.422061	0.0773229	0.0396117	0.000320101	0.000155555	0.782265
CXCL13	0	0	8.67744e-145	0	0.0593653	0.602674	0.416252	0.0770995	0.0396457	0.000722456	0.000351143	0.782265
MGRN1	0	0	1.16883e-144	0	0.0593393	0.602509	0.4247	0.0753167	0.039656	-0.000134221	6.524e-05	0.782265
LLGL1	0	0	8.05768e-145	0	0.0593942	0.598383	0.419998	0.0784442	0.0396636	0.000107429	5.22194e-05	0.782265
SEMA3B	0	0	1.06464e-144	0	0.0590022	0.60634	0.413089	0.077363	0.0396716	-0.000254508	0.000123717	0.782265
ZKSCAN3	0	0	1.18717e-144	0	0.060925	0.599633	0.41623	0.0760152	0.0396966	-0.000177179	8.61381e-05	0.782265
FAAP100	0	0	1.00148e-144	0	0.0589589	0.596449	0.418569	0.0766143	0.0397119	-0.000116502	5.66435e-05	0.782265
CDKL2	0	0	1.13189e-144	0	0.0597617	0.604378	0.419081	0.0753667	0.0398312	-0.000271681	0.000132172	0.783171
TFDP1	0	0	8.53303e-145	0	0.0601442	0.60153	0.41692	0.0757439	0.0398555	-0.000353551	0.000172022	0.783171
MAML1	0	0	8.96965e-145	0	0.0582955	0.599962	0.420927	0.0754108	0.0398845	-0.000107835	5.24753e-05	0.783171
MRPL45	0	0	9.87353e-145	0	0.0592179	0.602469	0.419962	0.077255	0.0399848	-0.000276535	0.000134637	0.784311
NOB1	0	0	9.59871e-145	0	0.0581573	0.601035	0.416176	0.0737591	0.0400486	-6.815e-05	3.3191e-05	0.784733
KIAA0040	0	0	1.01346e-144	0	0.059064	0.603124	0.420918	0.0758517	0.040421	0.000430434	0.000210025	0.790558
FAM159B	0	0	8.9608e-145	0	0.0590525	0.598922	0.420207	0.0742607	0.0404408	-0.000143566	7.00581e-05	0.790558
PTPRCAP	0	0	1.01258e-144	0	0.0579955	0.610745	0.422692	0.079271	0.0404737	-0.000135676	6.62191e-05	0.790558
VAMP3	0	0	8.25478e-145	0	0.0585619	0.601072	0.42177	0.07635	0.0405347	0.000328899	0.000160574	0.790918
FAM9A	0	0	9.49783e-145	0	0.05944	0.598259	0.41847	0.0769622	0.0405846	0.00037571	0.000183473	0.79106
HTATSF1	0	0	1.28534e-144	0	0.0596498	0.597996	0.420855	0.0755879	0.0406362	-0.000342231	0.000167167	0.791233
RHBDF1	0	0	9.10458e-145	0	0.0592866	0.604572	0.41945	0.0783519	0.0407532	0.000138362	6.76238e-05	0.792234
TSPAN19	0	0	1.13454e-144	0	0.0604052	0.602744	0.412983	0.0799826	0.040773	0.000371538	0.000181606	0.792234
TMEM191B	0	0	9.07478e-145	0	0.0601921	0.598682	0.426464	0.0757386	0.040821	0.000789227	0.000385861	0.792337
WDFY2	0	0	9.60368e-145	0	0.0590654	0.60659	0.420923	0.0734064	0.0408954	-0.000171265	8.3764e-05	0.792952
OR8D4	0	0	1.14913e-144	0	0.0592981	0.604643	0.413717	0.0746524	0.0409393	-0.000248075	0.000121358	0.792975
IQCF5	0	0	7.39336e-145	0	0.0593594	0.604971	0.422409	0.0756278	0.0410173	-0.000264102	0.000129248	0.793308
CCDC50	0	0	1.03206e-144	0	0.0609887	0.59456	0.418933	0.075707	0.041042	0.000124209	6.07937e-05	0.793308
AKAP8L	0	0	9.29637e-145	0	0.0582636	0.597103	0.416986	0.0757377	0.0413844	-0.000175293	8.59416e-05	0.799094
TRPM8	0	0	8.27137e-145	0	0.0610134	0.601763	0.423101	0.0758004	0.0414609	8.75825e-05	4.29555e-05	0.799433
SLC52A2	0	0	1.31714e-144	0	0.0597813	0.603942	0.422834	0.0733381	0.0416069	-0.00016914	8.30158e-05	0.799433
CPLX2	0	0	6.62544e-145	0	0.0599942	0.600606	0.420371	0.0771881	0.0416508	-0.000426572	0.000209411	0.799433
STAB2	0	0	1.47391e-144	0	0.0599496	0.602414	0.415501	0.078482	0.0416577	6.13059e-05	3.0097e-05	0.799433
LPXN	0	0	9.86398e-145	0	0.0600528	0.607812	0.420349	0.07672	0.0417084	-0.000151062	7.41795e-05	0.799433
HMCN1	0	0	9.5814e-145	0	0.0596673	0.609137	0.414694	0.078848	0.0417148	-3.71256e-05	1.82313e-05	0.799433
TMEM132A	0	0	9.6942e-145	0	0.0588752	0.603622	0.416775	0.0755764	0.041814	-9.07845e-05	4.46031e-05	0.799433
C7orf50	0	0	1.0271e-144	0	0.0592063	0.595732	0.419571	0.0754931	0.0418738	0.000268314	0.000131863	0.799433
DEFB4A	0	0	9.75857e-145	0	0.0585548	0.596282	0.424073	0.0747759	0.0419474	-0.00116982	0.000575116	0.799433
NCAPG2	0	0	1.02825e-144	0	0.0606223	0.601318	0.419301	0.0746988	0.0419554	7.4141e-05	3.64512e-05	0.799433
TRIM50	0	0	9.37008e-145	0	0.0594758	0.600588	0.425031	0.0722352	0.0420067	-0.000138805	6.82601e-05	0.799433
AGK	0	0	1.21736e-144	0	0.0610177	0.607482	0.418912	0.0776651	0.0420658	0.000189782	9.33559e-05	0.799433
QSOX1	0	0	1.11474e-144	0	0.0588241	0.605969	0.422105	0.0788867	0.0420816	0.000121904	5.99706e-05	0.799433
OR1G1	0	0	8.41297e-145	0	0.0599321	0.604389	0.418738	0.0757429	0.0422822	-0.000244329	0.000120315	0.799433
RHAG	0	0	1.09944e-144	0	0.0600525	0.606686	0.423798	0.0704277	0.0423198	0.000279737	0.000137776	0.799433
LNPEP	0	0	7.76944e-145	0	0.06085	0.605423	0.419578	0.0752661	0.0423616	0.000153846	7.57874e-05	0.799433
DKC1	0	0	9.52829e-145	0	0.0590352	0.600152	0.416519	0.078304	0.0424192	-0.000788665	0.000388619	0.799433
ZNF182	0	0	9.2426e-145	0	0.0586932	0.612579	0.419785	0.0744433	0.0424832	-0.000237052	0.000116845	0.799433
ITPR3	0	0	8.3342e-145	0	0.0595205	0.601186	0.420886	0.0769736	0.0425356	7.33189e-05	3.61487e-05	0.799433
DHX29	0	0	7.63569e-145	0	0.0585666	0.603967	0.414365	0.0760016	0.0426081	-0.000106685	5.26178e-05	0.799433
PPP4C	0	0	1.15875e-144	0	0.0610984	0.602213	0.416116	0.0762206	0.0426131	-0.000638759	0.000315047	0.799433
TCN1	0	0	1.06718e-144	0	0.0584663	0.605731	0.421186	0.0742767	0.0426576	0.000136985	6.75779e-05	0.799433
STX1B	0	0	1.13306e-144	0	0.0582242	0.607388	0.415551	0.0775695	0.0426615	-0.000508709	0.000250963	0.799433
LRRC63	0	0	9.13718e-145	0	0.0591463	0.604324	0.421853	0.0746324	0.0426908	-0.000233412	0.000115166	0.799433
GSE1	0	0	9.56102e-145	0	0.0611119	0.597593	0.415949	0.0722867	0.0427101	6.47918e-05	3.19714e-05	0.799433
TRH	0	0	1.10383e-144	0	0.0607505	0.603181	0.418021	0.0774396	0.0427316	0.000180654	8.91526e-05	0.799433
JADE1	0	0	1.10322e-144	0	0.0591603	0.598765	0.424096	0.0755132	0.0428044	-0.000236709	0.000116857	0.799433
PPP1R3G	0	0	8.46492e-145	0	0.0594576	0.601736	0.424203	0.075938	0.0428168	0.000289807	0.000143078	0.799433
C22orf23	0	0	1.00988e-144	0	0.0590348	0.603502	0.422175	0.0767592	0.0428459	0.000129173	6.37817e-05	0.799433
OSBPL3	0	0	8.99996e-145	0	0.0588996	0.607694	0.427307	0.074517	0.0428587	-0.000135464	6.68921e-05	0.799433
PNPLA5	0	0	9.97946e-145	0	0.0585681	0.610154	0.415115	0.0749869	0.0428733	-0.000140413	6.93409e-05	0.799433
CPSF4	0	0	7.23336e-145	0	0.0590556	0.605176	0.420019	0.0762395	0.0428929	0.000371889	0.00018367	0.799433
BEX3	0	0	9.61817e-145	0	0.0590123	0.603402	0.422428	0.0770751	0.042925	-0.00134119	0.000662494	0.799433
CRNN	0	0	8.78841e-145	0	0.0595007	0.59939	0.419793	0.0764951	0.0429827	0.000243033	0.000120082	0.799433
IMMP2L	0	0	1.05566e-144	0	0.0602209	0.599701	0.42045	0.0754883	0.0430213	-0.000307167	0.000151798	0.799433
RNF133	0	0	9.41832e-145	0	0.0602289	0.600541	0.423866	0.0761519	0.0430276	-0.000118356	5.84916e-05	0.799433
BCOR	0	0	1.24553e-144	0	0.0577645	0.605837	0.420518	0.0742501	0.0430446	0.000182307	9.01039e-05	0.799433
MORN5	0	0	1.27247e-144	0	0.0587867	0.60585	0.420199	0.0754129	0.0430535	0.000223876	0.000110654	0.799433
SLC22A4	0	0	1.0814e-144	0	0.0590069	0.595931	0.422357	0.0784994	0.0431117	-0.00016483	8.14922e-05	0.799433
SOS2	0	0	8.42008e-145	0	0.0606366	0.59877	0.421231	0.0744797	0.0431652	-0.000136365	6.74367e-05	0.799433
TDRD9	0	0	8.5795e-145	0	0.0590079	0.589757	0.421991	0.0758449	0.0431684	-9.39926e-05	4.64827e-05	0.799433
SLA	0	0	1.06578e-144	0	0.059858	0.60765	0.409302	0.0799242	0.0433508	0.000167941	8.31256e-05	0.802012
ZNF334	0	0	9.25123e-145	0	0.0590665	0.606329	0.425976	0.0785867	0.0434623	-0.000135255	6.69823e-05	0.802924
GRB7	0	0	1.04307e-144	0	0.0597432	0.602799	0.414121	0.0770817	0.0435169	-7.41785e-05	3.67451e-05	0.802924
RPS15A	0	0	8.88418e-145	0	0.0582805	0.605065	0.417765	0.0752356	0.04353	-0.000865526	0.000428774	0.802924
PRSS1	0	0	1.03576e-144	0	0.0597522	0.603944	0.420327	0.0760389	0.0436715	-0.000387153	0.000191921	0.803542
CCDC185	0	0	7.37429e-145	0	0.0601412	0.600751	0.420126	0.0768307	0.0436913	0.000165329	8.19655e-05	0.803542
OR4F6	0	0	9.89688e-145	0	0.0599981	0.59894	0.412967	0.076396	0.0437163	-0.000179539	8.90209e-05	0.803542
RSAD1	0	0	1.06285e-144	0	0.0582976	0.607147	0.416584	0.0743297	0.0438075	-0.000136923	6.792e-05	0.803542
KLHL36	0	0	1.05955e-144	0	0.0599561	0.601047	0.419359	0.0794347	0.0438124	-0.000133711	6.63279e-05	0.803542
ZNF251	0	0	1.03588e-144	0	0.0606583	0.607856	0.419426	0.0783029	0.043848	-0.000239456	0.000118804	0.803542
CHEK1	0	0	1.05013e-144	0	0.0585705	0.599642	0.411653	0.0770874	0.043893	0.000248729	0.000123431	0.803542
EIF1AX	0	0	8.70553e-145	0	0.059925	0.599333	0.422864	0.07597	0.0439351	-0.00335263	0.00166406	0.803542
COL9A2	0	0	9.9143e-145	0	0.0595017	0.606561	0.42159	0.0748838	0.0439532	9.89429e-05	4.9114e-05	0.803542
GRWD1	0	0	1.1918e-144	0	0.0622833	0.59612	0.42037	0.0753343	0.0440193	0.000166261	8.25558e-05	0.803959
CAMTA1	0	0	1.09363e-144	0	0.0596103	0.602632	0.420108	0.0776915	0.0442583	-0.000105217	5.23036e-05	0.805544
SLC7A4	0	0	1.08709e-144	0	0.058625	0.601098	0.42198	0.0708477	0.0442771	9.7774e-05	4.86081e-05	0.805544
KLRC2	0	0	1.18395e-144	0	0.0590048	0.598047	0.418926	0.0759352	0.0443654	-0.000625356	0.000311023	0.805544
TEX44	0	0	9.10436e-145	0	0.0603109	0.601573	0.41768	0.0765565	0.0443774	0.000161921	8.05368e-05	0.805544
SIPA1L1	0	0	9.73962e-145	0	0.0599754	0.601393	0.419768	0.0741629	0.0444133	-0.000128753	6.405e-05	0.805544
DTNBP1	0	0	1.07627e-144	0	0.0596708	0.608513	0.42166	0.0755059	0.0445493	-0.000204958	0.000102025	0.805544
NDUFB9	0	0	1.10519e-144	0	0.0595063	0.598712	0.42062	0.0762188	0.0446237	-0.000267179	0.000133044	0.805544
TMEM106B	0	0	8.57701e-145	0	0.0595934	0.597114	0.42452	0.0741657	0.0446692	0.000430995	0.000214663	0.805544
GBP2	0	0	8.93374e-145	0	0.0590452	0.615371	0.419187	0.0756326	0.0446754	0.000103224	5.14138e-05	0.805544
GRM1	0	0	9.84137e-145	0	0.05952	0.60546	0.418208	0.0770311	0.0447102	-0.000167907	8.36443e-05	0.805544
RAB1B	0	0	9.44135e-145	0	0.0588373	0.605359	0.416402	0.0759066	0.0447609	-0.000578474	0.00028824	0.805544
RPAIN	0	0	9.08433e-145	0	0.0603582	0.600402	0.421394	0.0748586	0.0447881	-0.000260416	0.000129776	0.805544
LRR1	0	0	9.89898e-145	0	0.0604437	0.59972	0.423911	0.0770841	0.0448107	0.000166614	8.30392e-05	0.805544
PAIP1	0	0	1.00427e-144	0	0.0607384	0.604239	0.420652	0.0743946	0.0448763	-0.000273641	0.000136423	0.805544
ZCCHC6	0	0	1.01388e-144	0	0.0593339	0.595938	0.41501	0.0789883	0.0448893	9.53059e-05	4.75173e-05	0.805544
ISX	0	0	9.71283e-145	0	0.0595682	0.599618	0.423733	0.0742255	0.0449704	-0.000194774	9.71465e-05	0.805544
SIRPB2	0	0	9.14902e-145	0	0.0606097	0.60298	0.420018	0.0770686	0.0449805	0.000266822	0.000133088	0.805544
RBM10	0	0	9.69962e-145	0	0.0594768	0.602333	0.419584	0.0776437	0.0450334	-0.000448378	0.000223701	0.805544
TAF7	0	0	1.13707e-144	0	0.0589736	0.600452	0.420552	0.0770075	0.0450466	0.000287124	0.000143258	0.805544
C20orf96	0	0	1.2165e-144	0	0.0596475	0.602164	0.417793	0.0803237	0.0450694	-0.000220287	0.000109922	0.805544
PKN2	0	0	1.20311e-144	0	0.0594183	0.605771	0.418907	0.0755633	0.0450972	-0.000274712	0.000137098	0.805544
GRB2	0	0	1.05588e-144	0	0.0582317	0.59433	0.420084	0.0749144	0.0451237	-0.000783245	0.000390935	0.805544
DEPDC4	0	0	1.08533e-144	0	0.0598745	0.598389	0.42191	0.0756932	0.045126	-0.000300359	0.000149917	0.805544
SRSF1	0	0	9.34931e-145	0	0.0602116	0.602079	0.422906	0.0754717	0.0452382	-0.00175565	0.00087675	0.805544
ZNF550	0	0	1.21121e-144	0	0.0590466	0.599186	0.419853	0.075949	0.0452636	0.000113624	5.67491e-05	0.805544
FDPS	0	0	1.14717e-144	0	0.0598014	0.603078	0.419879	0.0725347	0.0452657	0.000120662	6.0265e-05	0.805544
CHRND	0	0	9.50669e-145	0	0.0597394	0.603575	0.41853	0.076207	0.0452782	7.9423e-05	3.96703e-05	0.805544
RD3L	0	0	1.48982e-144	0	0.0614728	0.605389	0.415987	0.0750543	0.0453749	-0.000346132	0.000172964	0.806492
PLIN5	0	0	1.048e-144	0	0.0597444	0.608401	0.411724	0.0746808	0.045423	9.98336e-05	4.98985e-05	0.806565
EYA1	0	0	1.03829e-144	0	0.0588085	0.601058	0.420941	0.0754649	0.0454946	0.000155754	7.78744e-05	0.806565
KDELR2	0	0	1.04178e-144	0	0.0593489	0.601072	0.419502	0.0763158	0.0455245	-0.000310633	0.000155332	0.806565
CHGB	0	0	1.1268e-144	0	0.0580054	0.600445	0.418792	0.0779722	0.0455529	-0.000159511	7.97744e-05	0.806565
VRTN	0	0	1.23604e-144	0	0.0583233	0.600704	0.420659	0.0785091	0.0456968	-0.00014209	7.11091e-05	0.807622
TNNC1	0	0	8.76479e-145	0	0.0594329	0.606305	0.418057	0.0780298	0.0456997	0.000561732	0.000281123	0.807622
HIPK3	0	0	1.16853e-144	0	0.0599925	0.604396	0.421275	0.08188	0.0458374	0.000125431	6.28126e-05	0.809285
GPR34	0	0	8.94266e-145	0	0.0607083	0.602765	0.412341	0.0770491	0.0459496	-0.00079	0.000395817	0.809328
FGD1	0	0	1.03018e-144	0	0.060908	0.605422	0.418557	0.0760959	0.0460347	-0.000240341	0.000120466	0.809328
NUDT5	0	0	1.00632e-144	0	0.0591985	0.60207	0.419452	0.0753183	0.0460705	0.000350723	0.000175822	0.809328
NPHP1	0	0	1.0379e-144	0	0.0597004	0.594625	0.423268	0.0733436	0.0460879	-0.000136967	6.86689e-05	0.809328
LIG1	0	0	1.292e-144	0	0.059939	0.597705	0.418696	0.078552	0.0461984	8.12531e-05	4.07571e-05	0.809328
DOK6	0	0	1.06167e-144	0	0.0598602	0.605764	0.416022	0.0723623	0.0462171	-0.000131805	6.61198e-05	0.809328
RAB25	0	0	9.40843e-145	0	0.0588441	0.604965	0.420243	0.0773595	0.0462728	-7.7922e-05	3.90995e-05	0.809328
OR10A5	0	0	1.1026e-144	0	0.0601941	0.60093	0.420741	0.0738081	0.0462871	-0.00018287	9.17662e-05	0.809328
TTC38	0	0	1.07414e-144	0	0.05865	0.601927	0.416227	0.0748705	0.0462943	-6.51983e-05	3.27183e-05	0.809328
PHLDA2	0	0	1.10566e-144	0	0.0605698	0.601788	0.41855	0.0750805	0.0463194	-0.000428215	0.000214915	0.809328
PGAM2	0	0	1.11615e-144	0	0.0601075	0.604475	0.416481	0.0776772	0.0463692	0.000142419	7.14941e-05	0.809328
DDX23	0	0	1.05479e-144	0	0.058527	0.598626	0.420767	0.0743573	0.0464619	-0.000221359	0.000111169	0.809328
TMIGD1	0	0	1.36069e-144	0	0.0599367	0.599282	0.418885	0.0752298	0.0464778	-0.000318792	0.000160113	0.809328
NUP107	0	0	1.12239e-144	0	0.0590386	0.601509	0.411987	0.0771651	0.0464822	0.000139182	6.99054e-05	0.809328
EDEM2	0	0	1.399e-144	0	0.0595185	0.605963	0.418462	0.0767161	0.046494	0.000144997	7.28298e-05	0.809328
ZNF716	0	0	1.02309e-144	0	0.0587445	0.60012	0.41939	0.0743438	0.0466306	8.78128e-05	4.41346e-05	0.810093
FAM126B	0	0	7.82339e-145	0	0.0606283	0.598973	0.420176	0.075945	0.0466998	0.000228103	0.00011468	0.810093
C9orf43	0	0	1.03828e-144	0	0.0594234	0.596835	0.417754	0.0771717	0.0468107	0.00030089	0.000151351	0.810093
CARF	0	0	1.18261e-144	0	0.0605539	0.600539	0.420259	0.0730046	0.0468209	-0.000135886	6.83555e-05	0.810093
SUMF1	0	0	1.03812e-144	0	0.0592427	0.599786	0.41523	0.0768358	0.0468969	-0.000177252	8.91946e-05	0.810093
KCTD14	0	0	9.18616e-145	0	0.059108	0.601445	0.418184	0.0781582	0.0469962	-0.000200973	0.000101177	0.810093
LEKR1	0	0	9.11023e-145	0	0.0580727	0.604971	0.419496	0.0771778	0.0470172	-0.000167439	8.43027e-05	0.810093
IP6K1	0	0	9.2252e-145	0	0.0607173	0.603475	0.423675	0.0755175	0.0471615	-0.000298988	0.000150634	0.810093
OR2F2	0	0	7.74752e-145	0	0.0612101	0.60656	0.418018	0.0759232	0.0471969	-0.000392412	0.000197734	0.810093
TRERF1	0	0	8.50882e-145	0	0.0589502	0.598967	0.414211	0.0761083	0.047233	-0.000108682	5.47731e-05	0.810093
BRF1	0	0	8.93887e-145	0	0.0586331	0.606419	0.41719	0.0767772	0.0472477	0.000135922	6.85061e-05	0.810093
MMRN2	0	0	1.17074e-144	0	0.0586357	0.604257	0.421433	0.0753622	0.0473722	-0.00019268	9.71671e-05	0.810093
HNRNPL	0	0	8.32809e-145	0	0.0594815	0.598041	0.413214	0.0801179	0.047381	0.000281197	0.000141811	0.810093
FBXO33	0	0	8.59371e-145	0	0.0613798	0.603673	0.416345	0.0766312	0.0475024	-0.000202528	0.000102194	0.810093
EIF4EBP3	0	0	1.06853e-144	0	0.0599727	0.606917	0.421791	0.0743142	0.0475641	-0.00100577	0.000507641	0.810093
CLN6	0	0	8.50894e-145	0	0.0598691	0.604777	0.420719	0.0741432	0.0476619	-0.000185319	9.35771e-05	0.810093
RIC1	0	0	8.69871e-145	0	0.0583917	0.606951	0.415492	0.0776823	0.0476799	-0.000117689	5.9432e-05	0.810093
HBP1	0	0	1.18017e-144	0	0.0578757	0.605142	0.421991	0.0746508	0.0476967	-0.00023482	0.000118591	0.810093
NELFCD	0	0	9.36114e-145	0	0.0583505	0.612898	0.417657	0.0778292	0.04773	-0.000211859	0.000107011	0.810093
CLEC17A	0	0	9.60079e-145	0	0.0604962	0.611135	0.423379	0.0756152	0.0477601	-0.000368738	0.000186277	0.810093
VSIG1	0	0	9.09393e-145	0	0.0604158	0.610705	0.419937	0.0771253	0.0477683	-0.000245282	0.000123915	0.810093
ART1	0	0	1.22406e-144	0	0.0596976	0.60563	0.419142	0.0783283	0.0477897	8.45894e-05	4.27381e-05	0.810093
COX7B	0	0	1.13281e-144	0	0.05892	0.606203	0.418907	0.0788886	0.0477976	0.00124285	0.000627961	0.810093
RPS6KA4	0	0	9.6916e-145	0	0.0607241	0.598305	0.420782	0.072051	0.0478068	0.000124977	6.31485e-05	0.810093
NBPF26	0	0	9.72627e-145	0	0.0595246	0.601582	0.420849	0.078344	0.0478104	0.000173246	8.75391e-05	0.810093
PMM2	0	0	1.08858e-144	0	0.0601276	0.603028	0.415039	0.0816474	0.0478311	7.87367e-05	3.97884e-05	0.810093
AKAP12	0	0	8.55021e-145	0	0.0602153	0.603893	0.422078	0.0767213	0.0478956	8.23607e-05	4.16318e-05	0.810093
FOXB2	0	0	1.16019e-144	0	0.0608911	0.611612	0.422028	0.0743618	0.0479214	-0.00017843	9.02035e-05	0.810093
TMEM205	0	0	1.39901e-144	0	0.0587452	0.604416	0.421126	0.0761139	0.0479409	-0.000349854	0.00017688	0.810093
WDFY4	0	0	9.11129e-145	0	0.0603893	0.602402	0.421251	0.0772607	0.0479595	-6.82393e-05	3.45036e-05	0.810093
KLHL17	0	0	8.11825e-145	0	0.060066	0.595198	0.416103	0.0777544	0.0479604	-0.000119223	6.02827e-05	0.810093
ATF7IP	0	0	1.00135e-144	0	0.0593552	0.604795	0.422102	0.0740482	0.0481298	-0.000102856	5.20466e-05	0.810093
PACSIN1	0	0	9.04547e-145	0	0.059917	0.607466	0.420065	0.0739225	0.0481358	-0.000187169	9.47122e-05	0.810093
HS3ST4	0	0	9.88346e-145	0	0.0587383	0.610957	0.415148	0.0789839	0.0481417	0.000219921	0.000111289	0.810093
GDI2	0	0	1.12388e-144	0	0.0587635	0.602951	0.419049	0.0759002	0.0482287	-0.000286225	0.000144897	0.810093
ZFP69B	0	0	9.23021e-145	0	0.0589315	0.611157	0.414162	0.0778186	0.0483047	-8.07399e-05	4.08872e-05	0.810093
APPL1	0	0	9.08353e-145	0	0.0588773	0.606187	0.418517	0.0747838	0.048358	-0.00014952	7.57361e-05	0.810093
VGF	0	0	9.68336e-145	0	0.0593683	0.605026	0.417098	0.0770495	0.0484641	0.000146929	7.44586e-05	0.810093
WDR77	0	0	8.60111e-145	0	0.0576645	0.594734	0.420727	0.0771122	0.0485094	0.000369266	0.000187169	0.810093
NHEJ1	0	0	1.4493e-144	0	0.0597438	0.605832	0.417907	0.0812234	0.0485549	-0.000175344	8.88943e-05	0.810093
CDR1	0	0	1.18794e-144	0	0.0597578	0.608487	0.420413	0.0775825	0.0485991	0.000489619	0.000248272	0.810093
F10	0	0	1.15806e-144	0	0.0598383	0.599639	0.415844	0.0733215	0.0487165	-0.00019254	9.76822e-05	0.810093
WDR24	0	0	1.1844e-144	0	0.0586415	0.593536	0.420849	0.0769407	0.0487951	0.000152617	7.74552e-05	0.810093
SELENOS	0	0	1.12103e-144	0	0.0587623	0.603397	0.418979	0.0765264	0.0488595	0.000190546	9.67319e-05	0.810093
C1orf127	0	0	1.11537e-144	0	0.0593224	0.602711	0.417613	0.0809634	0.048867	-0.000150258	7.62821e-05	0.810093
EGFL7	0	0	9.56024e-145	0	0.0598031	0.601263	0.421418	0.0766877	0.0488947	0.000157298	7.9866e-05	0.810093
SNX5	0	0	1.00193e-144	0	0.0601864	0.600526	0.423963	0.0749937	0.0489001	0.000135216	6.86558e-05	0.810093
NPFFR2	0	0	9.31935e-145	0	0.0609281	0.603591	0.417091	0.0767603	0.0489095	0.000250689	0.000127292	0.810093
DHX9	0	0	1.03389e-144	0	0.0607556	0.593101	0.416581	0.0759358	0.0489821	-0.000312754	0.000158858	0.810093
FOXA2	0	0	1.16991e-144	0	0.059552	0.598855	0.418416	0.0759714	0.0490007	0.000238277	0.000121039	0.810093
ADAP2	0	0	1.56533e-144	0	0.0594485	0.602444	0.419277	0.0756047	0.049023	-0.000243013	0.000123457	0.810093
PYGB	0	0	8.88875e-145	0	0.0602112	0.60052	0.420939	0.0753122	0.0490463	-8.35845e-05	4.24673e-05	0.810093
SPRY3	0	0	9.5228e-145	0	0.0611329	0.601282	0.415992	0.0772197	0.0490765	0.000443258	0.000225239	0.810093
IQCK	0	0	1.32559e-144	0	0.0592605	0.601257	0.419246	0.0794622	0.04909	0.000116806	5.93578e-05	0.810093
C5AR2	0	0	1.14766e-144	0	0.0602601	0.600907	0.420054	0.0768735	0.0491018	0.000307421	0.000156232	0.810093
SPIRE2	0	0	1.24625e-144	0	0.0613076	0.598417	0.422313	0.0780425	0.0491363	0.00010991	5.58651e-05	0.810093
FAM167B	0	0	1.04587e-144	0	0.0590791	0.607515	0.415546	0.0777225	0.0491477	-0.000355504	0.000180704	0.810093
PRELID2	0	0	9.81976e-145	0	0.059212	0.597657	0.418736	0.0759362	0.0491587	-0.000270041	0.00013727	0.810093
TBXAS1	0	0	9.60048e-145	0	0.0580652	0.60809	0.41961	0.072673	0.0491872	-0.000112893	5.73938e-05	0.810093
TMEM5	0	0	7.52869e-145	0	0.0591185	0.602219	0.425692	0.0759463	0.0492422	-0.000233263	0.000118618	0.810093
SH2D4A	0	0	1.01079e-144	0	0.0598086	0.600162	0.419346	0.0762033	0.0492469	9.23606e-05	4.69678e-05	0.810093
NINJ2	0	0	9.944e-145	0	0.058803	0.598718	0.421046	0.0740451	0.0492818	0.000288169	0.000146564	0.810093
HRNR	0	0	8.45825e-145	0	0.0599696	0.605628	0.425428	0.0754146	0.04935	-8.61419e-05	4.38253e-05	0.810093
BMP1	0	0	1.04783e-144	0	0.0600096	0.604933	0.421333	0.0778696	0.0493718	7.04143e-05	3.58272e-05	0.810093
SLC10A5	0	0	9.39873e-145	0	0.0609245	0.60505	0.419759	0.0748113	0.0493757	0.000194361	9.8894e-05	0.810093
DCDC2B	0	0	9.22747e-145	0	0.060139	0.602875	0.414557	0.0788496	0.0494386	-8.24529e-05	4.19649e-05	0.810408
VWA3A	0	0	1.0469e-144	0	0.0602175	0.594946	0.421955	0.0760844	0.0495216	8.57546e-05	4.36612e-05	0.811053
KRTAP10-6	0	0	1.15694e-144	0	0.060169	0.601149	0.422738	0.0759812	0.0496559	-0.000296431	0.000151014	0.811648
ZNF524	0	0	8.1316e-145	0	0.0589435	0.602347	0.420893	0.076767	0.0496663	0.000288168	0.000146812	0.811648
NFS1	0	0	1.022e-144	0	0.0588264	0.598525	0.41774	0.0797274	0.0497074	0.000141032	7.18637e-05	0.811648
ZKSCAN8	0	0	9.55745e-145	0	0.0594204	0.602856	0.420348	0.0773745	0.0497329	-0.000167563	8.53922e-05	0.811648
FBP2	0	0	1.36105e-144	0	0.059906	0.606143	0.417165	0.0750025	0.0499114	-7.58902e-05	3.87049e-05	0.811922
YEATS2	0	0	1.08543e-144	0	0.0597859	0.597433	0.422487	0.0732236	0.0499119	-0.000129684	6.61405e-05	0.811922
ARHGAP27	0	0	1.04241e-144	0	0.0593843	0.597583	0.422972	0.0793457	0.0499713	0.000144931	7.3936e-05	0.811922
TAF1B	0	0	9.91317e-145	0	0.0590283	0.60281	0.419885	0.0753923	0.0500659	0.000154622	7.89122e-05	0.811922
RASGRP3	0	0	1.1101e-144	0	0.0597093	0.59606	0.421865	0.0758151	0.0501138	9.13251e-05	4.6618e-05	0.811922
SOCS3	0	0	1.12259e-144	0	0.0588178	0.598381	0.416865	0.0783024	0.0501595	0.000796949	0.000406893	0.811922
CHRM4	0	0	9.74451e-145	0	0.0601102	0.601461	0.419476	0.0768042	0.0501886	0.00028942	0.000147786	0.811922
FBXL7	0	0	8.69084e-145	0	0.0599161	0.602514	0.422459	0.0780256	0.0502065	-0.000219138	0.000111907	0.811922
HDHD2	0	0	8.70615e-145	0	0.0585892	0.608244	0.423171	0.0753674	0.0502507	0.000205351	0.000104886	0.811922
ZNF425	0	0	8.50764e-145	0	0.0592414	0.602689	0.4265	0.0766426	0.050251	-0.000114276	5.83684e-05	0.811922
RAB7A	0	0	1.14359e-144	0	0.0603193	0.602625	0.416064	0.0768731	0.0502842	0.00071711	0.000366329	0.811922
KBTBD12	0	0	1.02554e-144	0	0.058848	0.609333	0.421517	0.0762045	0.0503374	-0.0001117	5.70743e-05	0.811922
BTN2A1	0	0	1.14492e-144	0	0.0598918	0.599489	0.421771	0.0734563	0.050408	-0.000171484	8.76481e-05	0.811922
PDIK1L	0	0	1.09637e-144	0	0.0603087	0.604401	0.420655	0.0743039	0.0504182	-0.000469638	0.00024005	0.811922
NFKBIE	0	0	9.80205e-145	0	0.0598838	0.598641	0.416081	0.0753484	0.0505029	-0.000171883	8.78883e-05	0.811922
PPT2	0	0	9.69917e-145	0	0.0604013	0.608018	0.421789	0.0748283	0.050554	-0.000314125	0.000160656	0.811922
ZNF839	0	0	1.17684e-144	0	0.0603086	0.599308	0.422544	0.0749838	0.0506026	-0.000158131	8.08918e-05	0.811922
OARD1	0	0	1.04701e-144	0	0.0615633	0.605246	0.421291	0.0753279	0.0507195	-9.22024e-05	4.71898e-05	0.811922
IER5L	0	0	9.46163e-145	0	0.0590703	0.604698	0.422329	0.0776504	0.0507974	0.000355691	0.000182106	0.811922
NF1	0	0	1.04733e-144	0	0.0602836	0.594244	0.423911	0.0773564	0.0508317	0.000127131	6.50982e-05	0.811922
PEX5L	0	0	9.14145e-145	0	0.0572774	0.598097	0.42535	0.0746713	0.0508699	-0.000179228	9.17896e-05	0.811922
ZNF596	0	0	1.02428e-144	0	0.059771	0.601945	0.42339	0.0751518	0.050899	-0.000106041	5.43147e-05	0.811922
USP38	0	0	8.82552e-145	0	0.059749	0.605457	0.417108	0.0773063	0.0509388	-0.000196183	0.000100503	0.811922
AFM	0	0	1.24026e-144	0	0.0586963	0.604476	0.41906	0.075962	0.0510784	-0.000161927	8.30037e-05	0.811922
MRPS34	0	0	1.03826e-144	0	0.060094	0.605458	0.416921	0.0750057	0.0511256	-9.93246e-05	5.09241e-05	0.811922
SDHAF3	0	0	9.68082e-145	0	0.0600323	0.606036	0.416982	0.0772232	0.0511963	-0.000297133	0.000152388	0.811922
MAGEA4	0	0	1.48637e-144	0	0.0593005	0.599238	0.419818	0.0747843	0.0511976	-0.000423192	0.00021704	0.811922
GPRC5C	0	0	9.73651e-145	0	0.0598322	0.604129	0.423635	0.0767619	0.0512405	-0.000132998	6.82224e-05	0.811922
RBM33	0	0	1.25513e-144	0	0.0589433	0.6068	0.423652	0.078	0.0512537	0.000143049	7.3382e-05	0.811922
GRIN2B	0	0	8.6339e-145	0	0.0599238	0.607587	0.41707	0.076331	0.0512914	0.00022109	0.000113435	0.811922
PRR32	0	0	7.90702e-145	0	0.0597993	0.612793	0.415017	0.0758136	0.051295	-0.000393681	0.000201989	0.811922
CYSLTR1	0	0	1.16761e-144	0	0.0601767	0.60073	0.41919	0.0744605	0.0513438	-0.000343677	0.00017637	0.811922
LONP2	0	0	1.0623e-144	0	0.0581661	0.604247	0.417462	0.0782165	0.0514702	8.39832e-05	4.31224e-05	0.811922
CRTC3	0	0	1.02846e-144	0	0.0597486	0.604303	0.42226	0.0782368	0.0514712	0.000160534	8.2429e-05	0.811922
TEF	0	0	9.98638e-145	0	0.0600026	0.599784	0.414645	0.0826472	0.0514969	-0.000265255	0.000136215	0.811922
IRF7	0	0	9.74437e-145	0	0.0583062	0.60091	0.418987	0.079631	0.0515206	0.000178779	9.18164e-05	0.811922
FAM32A	0	0	8.15125e-145	0	0.0587161	0.600208	0.417407	0.076697	0.0517086	0.000388946	0.000199914	0.811922
NSD1	0	0	8.24813e-145	0	0.0599757	0.604514	0.4192	0.0770208	0.051716	-0.000143656	7.38398e-05	0.811922
CHDH	0	0	7.87336e-145	0	0.0617247	0.602066	0.416879	0.0780077	0.051727	0.000129532	6.65834e-05	0.811922
ETAA1	0	0	9.2375e-145	0	0.0600019	0.605763	0.416496	0.076011	0.0517437	-0.000145938	7.50217e-05	0.811922
ITGB1BP2	0	0	9.32098e-145	0	0.0596875	0.594394	0.418995	0.0767768	0.0517891	0.000335013	0.000172252	0.811922
OR4C3	0	0	1.03742e-144	0	0.0601328	0.602974	0.420177	0.0761761	0.0519032	0.000299497	0.000154066	0.811922
SLC25A26	0	0	1.13716e-144	0	0.0586151	0.604993	0.42167	0.0757247	0.0520725	0.000171881	8.84822e-05	0.811922
PTPN12	0	0	1.08169e-144	0	0.0592195	0.59969	0.419603	0.0772935	0.0520895	0.000175233	9.02143e-05	0.811922
KRTAP5-8	0	0	1.08263e-144	0	0.05961	0.594716	0.42341	0.0734461	0.0521103	-0.000386343	0.000198916	0.811922
FAM57B	0	0	1.0108e-144	0	0.0593773	0.603588	0.417333	0.0768114	0.0521592	0.000316903	0.000163197	0.811922
CPT2	0	0	1.10623e-144	0	0.0589751	0.600765	0.419732	0.0753683	0.0522527	-8.77687e-05	4.52168e-05	0.811922
EXOSC4	0	0	1.03195e-144	0	0.0592378	0.598882	0.42075	0.0761819	0.0522719	0.000244951	0.000126204	0.811922
CRY1	0	0	9.66598e-145	0	0.0612369	0.608053	0.421845	0.0781026	0.0523074	-0.000209457	0.000107933	0.811922
TCHP	0	0	1.05449e-144	0	0.0589292	0.607899	0.41987	0.0780093	0.0523416	0.000109944	5.66627e-05	0.811922
RPL5	0	0	1.13202e-144	0	0.0596441	0.59898	0.411463	0.080429	0.0523442	0.000148031	7.62926e-05	0.811922
SLC25A41	0	0	9.3869e-145	0	0.0595234	0.605601	0.425566	0.0762354	0.0523567	7.52887e-05	3.88045e-05	0.811922
HASPIN	0	0	1.10978e-144	0	0.0588302	0.596996	0.415279	0.0752002	0.052386	-0.000143991	7.42234e-05	0.811922
ESPNL	0	0	1.25608e-144	0	0.0603144	0.607222	0.417793	0.075107	0.0523865	-5.81491e-05	2.99744e-05	0.811922
MTRNR2L9	0	0	8.7058e-145	0	0.0598561	0.600864	0.423197	0.0778537	0.052471	0.00147989	0.000763119	0.811922
IL10RA	0	0	1.119e-144	0	0.0592108	0.607035	0.413441	0.0757572	0.0525011	-0.00019236	9.92046e-05	0.811922
ETFBKMT	0	0	9.22075e-145	0	0.0587765	0.606618	0.420707	0.076205	0.052508	0.000138687	7.15265e-05	0.811922
NTN4	0	0	1.10238e-144	0	0.060253	0.595358	0.424601	0.0745138	0.0525083	-8.69856e-05	4.4862e-05	0.811922
VEGFB	0	0	9.30101e-145	0	0.0577119	0.604568	0.420234	0.0737612	0.0525514	-0.000174222	8.98698e-05	0.811922
SIGLEC1	0	0	9.50456e-145	0	0.0592954	0.599235	0.418971	0.0732084	0.052595	-6.81396e-05	3.51552e-05	0.811922
QPCTL	0	0	9.84149e-145	0	0.0594291	0.598805	0.423038	0.0725242	0.0526195	7.87901e-05	4.06543e-05	0.811922
GAGE1	0	0	1.06034e-144	0	0.0600315	0.602623	0.415809	0.0765943	0.0527348	-0.00090692	0.000468183	0.811922
ZNF799	0	0	1.01311e-144	0	0.0585726	0.605994	0.417284	0.0765719	0.0527731	-0.000154741	7.98956e-05	0.811922
FAM92A	0	0	1.07106e-144	0	0.0601297	0.602362	0.418122	0.0772316	0.052807	0.000225872	0.000116639	0.811922
CCL8	0	0	1.07346e-144	0	0.0591451	0.600464	0.417898	0.0759699	0.0528084	-0.000506012	0.000261302	0.811922
RFX3	0	0	8.42658e-145	0	0.0583925	0.603794	0.422615	0.074949	0.0528387	0.000191708	9.901e-05	0.811922
SNAP91	0	0	9.69474e-145	0	0.059194	0.601623	0.419602	0.0763779	0.052866	0.000124594	6.43553e-05	0.811922
KCNK3	0	0	8.79108e-145	0	0.058572	0.609544	0.414329	0.076855	0.0528701	-0.000339971	0.000175605	0.811922
CEP112	0	0	7.9131e-145	0	0.0593889	0.598712	0.415812	0.0756292	0.0528839	-7.49673e-05	3.87251e-05	0.811922
ZC3HAV1L	0	0	8.60688e-145	0	0.0591257	0.605801	0.420365	0.0780769	0.0529297	0.000333101	0.0001721	0.811922
OGT	0	0	1.08884e-144	0	0.0596648	0.601668	0.411735	0.0769075	0.0530379	-0.000721225	0.000372797	0.811922
DDN	0	0	1.09229e-144	0	0.0594301	0.604088	0.421715	0.0774814	0.0530564	0.000192617	9.95708e-05	0.811922
EPC1	0	0	9.97835e-145	0	0.0587077	0.599813	0.426481	0.0730795	0.0531287	0.00015685	8.11057e-05	0.811922
SLCO3A1	0	0	1.10617e-144	0	0.0598237	0.597809	0.415909	0.0773164	0.0531373	-0.000169432	8.76151e-05	0.811922
BCL9	0	0	1.56656e-144	0	0.0600993	0.600329	0.418655	0.073837	0.0531694	-8.49793e-05	4.39497e-05	0.811922
ACTB	0	0	1.189e-144	0	0.0585382	0.601847	0.423392	0.0772259	0.0532488	-0.00191653	0.000991524	0.811922
CARMIL1	0	0	9.38804e-145	0	0.0586672	0.601193	0.421228	0.0795267	0.0532567	8.7057e-05	4.50407e-05	0.811922
PSG3	0	0	1.07668e-144	0	0.0587468	0.601051	0.418303	0.073866	0.0532568	-0.000177063	9.16071e-05	0.811922
C1orf137	0	0	8.73826e-145	0	0.0588251	0.601506	0.420912	0.0762258	0.0533529	0.00140375	0.000726552	0.811922
PHC3	0	0	7.61429e-145	0	0.0599159	0.596893	0.419347	0.0785803	0.0533617	8.78332e-05	4.54623e-05	0.811922
RASSF3	0	0	1.33167e-144	0	0.0594587	0.598409	0.415394	0.0772447	0.0534563	0.000196092	0.000101537	0.811922
CTNNBIP1	0	0	1.06643e-144	0	0.0596982	0.609333	0.41677	0.0745092	0.0534594	-0.000360413	0.000186626	0.811922
FAM46D	0	0	9.8637e-145	0	0.0601947	0.603176	0.41823	0.0767801	0.0535301	0.000785307	0.000406761	0.811922
TTC33	0	0	1.16686e-144	0	0.0597455	0.604352	0.421087	0.0748632	0.0535769	-0.000112607	5.83379e-05	0.811922
SPEM1	0	0	9.19566e-145	0	0.0605881	0.599804	0.424539	0.0764929	0.0535936	0.000158228	8.19783e-05	0.811922
DCUN1D2	0	0	8.86048e-145	0	0.0581458	0.603754	0.423384	0.0767617	0.0536802	0.000228995	0.000118686	0.811922
ZNF263	0	0	1.01928e-144	0	0.0599449	0.602403	0.423747	0.0752788	0.0537101	-0.000184326	9.55458e-05	0.811922
OPHN1	0	0	8.5596e-145	0	0.0617188	0.599492	0.417508	0.0762554	0.0537106	0.00034209	0.000177324	0.811922
GCNT4	0	0	1.04907e-144	0	0.0580803	0.593502	0.415278	0.0776478	0.0537218	0.000140095	7.26221e-05	0.811922
ALPL	0	0	8.55893e-145	0	0.0586273	0.598134	0.41877	0.076216	0.0537717	-0.000111974	5.80573e-05	0.811922
NKAP	0	0	1.25026e-144	0	0.0594903	0.601869	0.425051	0.075772	0.0537864	0.000596912	0.00030951	0.811922
BECN1	0	0	1.04341e-144	0	0.0600101	0.605614	0.427331	0.0739157	0.0538149	-0.000195552	0.000101409	0.811922
CREB3L3	0	0	8.63152e-145	0	0.0589196	0.602653	0.418903	0.076464	0.0538741	-0.000153019	7.93724e-05	0.811922
C20orf27	0	0	1.00875e-144	0	0.0603324	0.6089	0.421633	0.0754653	0.0539182	0.000276077	0.00014323	0.811922
MOCS2	0	0	1.33028e-144	0	0.0594923	0.594971	0.416946	0.0769044	0.0539396	8.7016e-05	4.51483e-05	0.811922
GALP	0	0	1.03727e-144	0	0.0614551	0.601372	0.415741	0.0758067	0.0539558	0.000288294	0.000149592	0.811922
GATB	0	0	8.04058e-145	0	0.0594005	0.597814	0.418747	0.0798018	0.0539939	-9.43472e-05	4.89631e-05	0.811922
ARID3B	0	0	7.86837e-145	0	0.0590844	0.608251	0.419017	0.0769824	0.0541111	-0.000176835	9.18164e-05	0.812845
FMNL1	0	0	1.0221e-144	0	0.0601474	0.603249	0.421325	0.075836	0.0541781	0.000111827	5.80791e-05	0.812845
CPNE6	0	0	9.20801e-145	0	0.0608166	0.5964	0.418231	0.0740717	0.054221	0.000229197	0.000119058	0.812845
SBDS	0	0	1.17603e-144	0	0.0596332	0.605131	0.419378	0.0750895	0.0542305	-0.000161227	8.37541e-05	0.812845
NRSN1	0	0	1.22194e-144	0	0.0592346	0.604273	0.412118	0.0783429	0.0543026	0.000311363	0.000161795	0.813213
ANKRD37	0	0	1.02337e-144	0	0.0589514	0.604182	0.419566	0.0752033	0.0543428	-0.000365183	0.000189793	0.813213
SRSF2	0	0	7.60411e-145	0	0.0610467	0.604172	0.418482	0.0753785	0.0544246	-0.000495807	0.000257768	0.813699
C1orf116	0	0	8.76821e-145	0	0.0598442	0.599453	0.421247	0.0763563	0.054463	0.000116747	6.07062e-05	0.813699
PSMG1	0	0	9.76655e-145	0	0.0607468	0.596804	0.418438	0.0773405	0.0548045	-0.000131171	6.83028e-05	0.816131
NSFL1C	0	0	1.04562e-144	0	0.060385	0.601879	0.419833	0.0737173	0.0548154	9.31325e-05	4.84976e-05	0.816131
GRB14	0	0	1.0537e-144	0	0.0596951	0.606284	0.414412	0.0793279	0.054851	0.000145661	7.58621e-05	0.816131
STK40	0	0	1.13841e-144	0	0.0589161	0.608863	0.420843	0.0782885	0.0548695	-0.00018693	9.73632e-05	0.816131
MVB12A	0	0	1.22718e-144	0	0.0592043	0.605402	0.418304	0.0783304	0.0548849	0.000122424	6.37692e-05	0.816131
RAP1GAP2	0	0	8.91121e-145	0	0.0601533	0.601835	0.421487	0.0774714	0.0548896	0.000178949	9.3214e-05	0.816131
HS6ST3	0	0	7.47393e-145	0	0.0596051	0.608461	0.417574	0.0738626	0.0549449	-0.0001407	7.33067e-05	0.816299
FAM174B	0	0	1.03417e-144	0	0.0602386	0.605097	0.423484	0.0744665	0.0551822	-0.000280587	0.000146333	0.816578
EFCAB2	0	0	1.14447e-144	0	0.0590707	0.597139	0.421254	0.0751533	0.0552052	0.000262687	0.000137011	0.816578
EDC4	0	0	9.76169e-145	0	0.0590037	0.599975	0.413828	0.0760783	0.0552085	0.000105131	5.48345e-05	0.816578
NRAS	0	0	1.01299e-144	0	0.0591042	0.603929	0.417323	0.0775895	0.0552525	-0.000576698	0.000300849	0.816578
ZEB1	0	0	1.03453e-144	0	0.0599088	0.599224	0.41836	0.0750402	0.0552733	-0.000122398	6.38576e-05	0.816578
AFF4	0	0	9.71851e-145	0	0.0595696	0.599784	0.424361	0.0739408	0.0554588	-0.000171494	8.95399e-05	0.816578
CC2D2A	0	0	1.09551e-144	0	0.0599847	0.608578	0.4122	0.0756856	0.0554681	-6.76646e-05	3.53302e-05	0.816578
SNX10	0	0	9.86132e-145	0	0.0597036	0.604245	0.419132	0.0739538	0.0554842	-0.000366323	0.000191283	0.816578
RPP40	0	0	1.33394e-144	0	0.061031	0.59379	0.419237	0.0755545	0.0555451	-0.000177529	9.27236e-05	0.816578
MAP2K2	0	0	1.211e-144	0	0.0601418	0.603284	0.413593	0.076989	0.0555562	-0.000221086	0.000115479	0.816578
TRPM5	0	0	1.10287e-144	0	0.0597838	0.595492	0.421113	0.0768623	0.0555738	-7.17671e-05	3.74884e-05	0.816578
CCDC129	0	0	8.48385e-145	0	0.0597043	0.604224	0.418694	0.0746985	0.055661	-0.000139933	7.3122e-05	0.816578
SENP1	0	0	9.38303e-145	0	0.0610068	0.595165	0.420144	0.0728329	0.0556658	-0.000188872	9.86969e-05	0.816578
RBP2	0	0	1.10152e-144	0	0.0587197	0.60335	0.41931	0.0779874	0.0557485	-0.000324813	0.000169791	0.816578
PKD1L2	0	0	1.25534e-144	0	0.0595004	0.59705	0.417637	0.0771317	0.0557987	-4.82584e-05	2.52315e-05	0.816578
FOXL2NB	0	0	1.28731e-144	0	0.0597246	0.603157	0.417066	0.0755228	0.0559909	-0.000347025	0.000181582	0.816578
GNLY	0	0	1.01943e-144	0	0.05919	0.596829	0.419019	0.0767612	0.0560855	0.000405584	0.000212305	0.816578
ADAM29	0	0	9.00055e-145	0	0.0583743	0.609096	0.416978	0.0782997	0.0561308	-0.0001627	8.51814e-05	0.816578
YTHDF2	0	0	9.73813e-145	0	0.0592687	0.599873	0.422141	0.0777754	0.0561753	-0.000239062	0.000125184	0.816578
HSD17B2	0	0	1.01315e-144	0	0.0609072	0.604447	0.42022	0.0747469	0.0561978	-0.000130606	6.83976e-05	0.816578
KRTAP10-2	0	0	1.13689e-144	0	0.0589919	0.60192	0.419882	0.0755415	0.0562231	-0.000297955	0.000156053	0.816578
NPIPB5	0	0	1.00205e-144	0	0.0602265	0.601217	0.419917	0.0743739	0.0562339	-0.000169692	8.88797e-05	0.816578
MAPK8	0	0	8.04272e-145	0	0.0591613	0.599994	0.422265	0.0765299	0.0562732	-0.000390361	0.000204492	0.816578
AGO1	0	0	1.28129e-144	0	0.0597072	0.59876	0.414423	0.0762462	0.0563088	-0.000310506	0.000162683	0.816578
DHH	0	0	9.79505e-145	0	0.0590412	0.606761	0.420916	0.0741724	0.0563195	-0.000261383	0.000136952	0.816578
OGFOD3	0	0	9.39243e-145	0	0.0593037	0.602433	0.420947	0.0733032	0.0563313	-0.000164226	8.60506e-05	0.816578
SLC30A3	0	0	1.1263e-144	0	0.0592514	0.605539	0.419965	0.0781989	0.0563597	0.000182821	9.58053e-05	0.816578
UBA6	0	0	8.19443e-145	0	0.0593293	0.603657	0.424115	0.0770502	0.056369	8.50976e-05	4.4596e-05	0.816578
PPP2R3A	0	0	9.29671e-145	0	0.0597451	0.600751	0.420047	0.0724292	0.0563811	-7.74579e-05	4.05944e-05	0.816578
RCOR1	0	0	1.05893e-144	0	0.0601197	0.600656	0.418535	0.0737087	0.0564208	-0.000328121	0.00017199	0.816578
ALG13	0	0	1.32185e-144	0	0.0584667	0.602523	0.417943	0.0779277	0.056441	-0.000192276	0.000100793	0.816578
CYP3A4	0	0	1.01931e-144	0	0.0582986	0.602726	0.421609	0.0715192	0.0564589	0.000127307	6.67405e-05	0.816578
ZFR	0	0	1.09368e-144	0	0.0588019	0.605654	0.416312	0.0762128	0.0564594	-0.000276101	0.000144746	0.816578
B3GLCT	0	0	1.36882e-144	0	0.0608827	0.602947	0.418224	0.0752844	0.0564649	0.000165497	8.67635e-05	0.816578
RBM43	0	0	1.04324e-144	0	0.060106	0.605347	0.418038	0.0773975	0.0565286	-0.000307292	0.000161143	0.816578
C11orf42	0	0	1.08302e-144	0	0.0598518	0.601379	0.419515	0.0795522	0.0566375	0.000214518	0.000112542	0.816578
MLPH	0	0	1.10383e-144	0	0.0590402	0.601133	0.417904	0.0770856	0.0566562	-0.000190962	0.000100191	0.816578
SLC22A3	0	0	1.05421e-144	0	0.0605335	0.601735	0.421141	0.0762624	0.0567024	0.000124071	6.5108e-05	0.816578
CNGA2	0	0	1.0573e-144	0	0.0584143	0.604784	0.421752	0.077894	0.0567227	0.000171855	9.01909e-05	0.816578
PIK3R6	0	0	7.61985e-145	0	0.0584253	0.612565	0.421031	0.0760019	0.0567239	-7.80507e-05	4.09619e-05	0.816578
RNF38	0	0	1.0687e-144	0	0.0598553	0.602719	0.419873	0.0789834	0.0567739	0.00031296	0.000164278	0.816664
ANO3	0	0	1.19395e-144	0	0.0594361	0.605068	0.4176	0.0741652	0.0568423	-8.04796e-05	4.22568e-05	0.817014
CDH11	0	0	1.1061e-144	0	0.0583835	0.603796	0.421417	0.0782729	0.0571003	-0.000154223	8.10606e-05	0.818814
KLHL13	0	0	1.20166e-144	0	0.0584011	0.601095	0.420903	0.0779577	0.0571464	0.000353085	0.000185619	0.818814
USP30	0	0	1.20053e-144	0	0.0601753	0.608987	0.423455	0.0758371	0.0571865	-0.000150784	7.92809e-05	0.818814
MACROD1	0	0	1.11627e-144	0	0.0602887	0.599795	0.414717	0.0766361	0.0572628	0.000136821	7.19611e-05	0.818814
EFNA4	0	0	1.24879e-144	0	0.0579023	0.602507	0.417402	0.0777998	0.0572697	0.000137654	7.24014e-05	0.818814
RIPOR1	0	0	1.05772e-144	0	0.0587554	0.602485	0.419809	0.0809663	0.0573164	8.32539e-05	4.37969e-05	0.818814
SGK2	0	0	8.77079e-145	0	0.0606515	0.604551	0.416511	0.0781745	0.0573216	0.000119674	6.29578e-05	0.818814
MEN1	0	0	1.15054e-144	0	0.0588826	0.594693	0.422995	0.0758892	0.057349	0.000312059	0.000164185	0.818814
CCNG1	0	0	1.14796e-144	0	0.059553	0.60418	0.42539	0.0756046	0.0573646	0.000269495	0.000141799	0.818814
KLHL7	0	0	1.1193e-144	0	0.0600686	0.59632	0.415277	0.07642	0.0574795	-0.000281704	0.000148291	0.819515
SRP68	0	0	1.04018e-144	0	0.0594476	0.600469	0.421239	0.0757603	0.0575384	-6.80664e-05	3.58392e-05	0.819515
AOC1	0	0	9.18127e-145	0	0.0592789	0.599869	0.417236	0.0779898	0.0576498	0.000137616	7.24915e-05	0.819515
OPRK1	0	0	9.64064e-145	0	0.0588446	0.604015	0.425048	0.0743227	0.0576527	-0.000146434	7.71376e-05	0.819515
OR4K5	0	0	1.05622e-144	0	0.0599702	0.601736	0.421356	0.074765	0.0576748	0.000298858	0.000157445	0.819515
WDR45	0	0	1.02884e-144	0	0.059113	0.598087	0.417608	0.0768162	0.0576787	0.000556134	0.000292987	0.819515
KRTAP22-2	0	0	1.20971e-144	0	0.0592137	0.607338	0.415112	0.0767525	0.0577635	-0.00377418	0.00198902	0.820091
NARS	0	0	1.17725e-144	0	0.0599928	0.605012	0.421449	0.075747	0.057823	-0.000141549	7.46153e-05	0.820281
PPIE	0	0	9.9877e-145	0	0.0599199	0.609063	0.414796	0.0750122	0.057869	-0.00020147	0.000106221	0.820281
SP5	0	0	9.47124e-145	0	0.0608198	0.604621	0.417571	0.0756554	0.0579247	-0.000263129	0.000138761	0.820281
ETFRF1	0	0	9.41019e-145	0	0.0595115	0.592742	0.420288	0.0773691	0.057962	0.000306056	0.000161422	0.820281
TLR6	0	0	9.2121e-145	0	0.0588671	0.601466	0.421758	0.0761565	0.0579979	0.000296569	0.00015644	0.820281
PRELID3B	0	0	1.25564e-144	0	0.0587999	0.604881	0.416663	0.0758306	0.0581048	0.000191515	0.000101067	0.820951
CCDC90B	0	0	9.18288e-145	0	0.0596506	0.600298	0.421692	0.0795761	0.0582116	7.63876e-05	4.03289e-05	0.820951
PM20D2	0	0	1.09888e-144	0	0.0594201	0.601481	0.418348	0.0764933	0.0582194	0.000256054	0.000135188	0.820951
GALNT1	0	0	1.12336e-144	0	0.0602272	0.597227	0.42264	0.0766027	0.0582691	0.000297675	0.000157193	0.820951
OR5D18	0	0	9.03682e-145	0	0.0595533	0.605502	0.424177	0.0743139	0.0583102	0.000220165	0.000116282	0.820951
TSGA13	0	0	7.40794e-145	0	0.0609067	0.601561	0.417958	0.0777913	0.0583142	0.000200672	0.000105988	0.820951
OR2L5	0	0	1.02237e-144	0	0.0606559	0.598498	0.416551	0.0754166	0.058355	0.000274321	0.000144911	0.820951
GCC1	0	0	8.89437e-145	0	0.0589163	0.599773	0.418649	0.07867	0.0585603	0.000140373	7.42129e-05	0.822182
DOPEY2	0	0	9.16475e-145	0	0.0604218	0.607868	0.416223	0.0763213	0.0586228	5.27659e-05	2.79033e-05	0.822182
PDS5B	0	0	1.00065e-144	0	0.0600448	0.60486	0.415804	0.0776152	0.0586265	0.000176748	9.34682e-05	0.822182
METTL21C	0	0	9.40814e-145	0	0.0593438	0.598201	0.425201	0.078115	0.0586498	-0.000137529	7.27346e-05	0.822182
RIMS4	0	0	1.27138e-144	0	0.0585047	0.602076	0.420041	0.0790534	0.058664	0.000375746	0.000198732	0.822182
ARHGEF28	0	0	1.125e-144	0	0.0593291	0.605985	0.418451	0.0757531	0.0588797	-5.70163e-05	3.01816e-05	0.824582
IPP	0	0	7.62784e-145	0	0.0598196	0.60286	0.421139	0.0770529	0.0589463	0.000139266	7.37399e-05	0.824893
HIST1H2BH	0	0	1.28082e-144	0	0.0598107	0.60037	0.418673	0.0768699	0.0592949	0.000233945	0.000124042	0.828081
SUPT6H	0	0	9.67752e-145	0	0.0600834	0.604594	0.416128	0.074329	0.0593187	-0.00010964	5.81387e-05	0.828081
CNTRL	0	0	8.41932e-145	0	0.0581385	0.595772	0.419162	0.0757162	0.0593263	-5.39334e-05	2.86e-05	0.828081
COLQ	0	0	1.14726e-144	0	0.0595445	0.604334	0.420401	0.0784452	0.0593527	0.000207414	0.00011	0.828081
CDPF1	0	0	1.04296e-144	0	0.0587914	0.601587	0.419622	0.0760154	0.0594268	0.00038104	0.000202139	0.828214
UBIAD1	0	0	1.08547e-144	0	0.0611465	0.601295	0.417119	0.0755751	0.0594515	-0.0004167	0.000221078	0.828214
MYOCD	0	0	1.03595e-144	0	0.0580829	0.601823	0.419836	0.075321	0.059517	-0.00013375	7.09787e-05	0.828505
BOC	0	0	1.14557e-144	0	0.0598334	0.606802	0.425153	0.0766691	0.0597432	-7.90621e-05	4.1994e-05	0.83103
ZNF512B	0	0	1.15554e-144	0	0.0608763	0.601294	0.414826	0.0756647	0.0598393	-0.000110736	5.88397e-05	0.831735
TEDDM1	0	0	1.00153e-144	0	0.0598252	0.601495	0.417935	0.0784426	0.0598835	-0.00039432	0.000209559	0.831735
ZNF142	0	0	6.79887e-145	0	0.0581241	0.59941	0.424874	0.0778306	0.059972	5.26437e-05	2.79869e-05	0.832335
NAGLU	0	0	8.75039e-145	0	0.0598843	0.601439	0.415007	0.0780427	0.060104	0.000148865	7.91818e-05	0.832335
POLE4	0	0	1.15398e-144	0	0.0603058	0.602487	0.424075	0.0740989	0.0602	-0.000427895	0.000227683	0.832335
ATXN2L	0	0	8.38408e-145	0	0.0599514	0.60728	0.419091	0.0786803	0.0602561	9.6052e-05	5.11206e-05	0.832335
BICDL2	0	0	1.17382e-144	0	0.059133	0.605415	0.42422	0.0787046	0.0602584	-9.77324e-05	5.20154e-05	0.832335
VWA7	0	0	9.70811e-145	0	0.059535	0.594418	0.415576	0.0740788	0.0602804	-0.000111617	5.94104e-05	0.832335
ULK2	0	0	1.04868e-144	0	0.0595051	0.607828	0.416599	0.0738853	0.0602824	-0.000110161	5.86356e-05	0.832335
CGB2	0	0	1.16266e-144	0	0.057939	0.601031	0.422196	0.0746216	0.0603243	-0.000104381	5.55679e-05	0.832335
RBM4	0	0	1.19062e-144	0	0.0605081	0.603967	0.417691	0.0754061	0.0603372	-0.000594018	0.000316247	0.832335
BBS5	0	0	8.85463e-145	0	0.0591355	0.603622	0.42272	0.0795567	0.0603752	7.46679e-05	3.9758e-05	0.832335
EIF2D	0	0	1.13839e-144	0	0.060623	0.60339	0.415856	0.0769545	0.0604264	-0.000182675	9.72875e-05	0.832422
THOC2	0	0	9.16505e-145	0	0.0597078	0.599239	0.418448	0.077021	0.0606043	-0.000512671	0.000273222	0.833234
FIZ1	0	0	8.45852e-145	0	0.0597348	0.6027	0.423144	0.0757224	0.0606244	-0.000161556	8.61064e-05	0.833234
SLC22A15	0	0	1.05411e-144	0	0.0597345	0.600354	0.418832	0.0740373	0.0606748	-0.000161552	8.61209e-05	0.833234
CUL3	0	0	1.13522e-144	0	0.059642	0.603566	0.415731	0.0751301	0.0607061	-0.000314865	0.00016787	0.833234
TMEM63A	0	0	9.84337e-145	0	0.0590783	0.599099	0.422313	0.075612	0.0607311	9.83766e-05	5.24545e-05	0.833234
ZFP36L2	0	0	1.31226e-144	0	0.0589005	0.606105	0.41962	0.076369	0.060817	-0.000285002	0.000152014	0.833234
TEFM	0	0	8.90854e-145	0	0.0595574	0.601903	0.418087	0.0744167	0.0608466	-0.000274733	0.000146554	0.833234
SMARCAD1	0	0	1.1949e-144	0	0.0590163	0.603662	0.417666	0.0761647	0.0608966	-0.000194538	0.000103795	0.833234
TIMM23	0	0	9.35512e-145	0	0.0585463	0.606551	0.42251	0.0769734	0.0609418	0.00266165	0.00142035	0.833234
GOLGA8N	0	0	1.23985e-144	0	0.0580214	0.604194	0.419453	0.0780161	0.0609635	-0.000438092	0.000233802	0.833234
IQCB1	0	0	1.13238e-144	0	0.0593916	0.606553	0.415041	0.075158	0.0610651	-9.58358e-05	5.11659e-05	0.833234
BORCS6	0	0	8.36552e-145	0	0.0591653	0.598256	0.424725	0.0771756	0.0610753	0.000175807	9.38653e-05	0.833234
UNC119	0	0	1.11523e-144	0	0.0604415	0.599963	0.420052	0.0735445	0.0610815	-0.000126494	6.75384e-05	0.833234
ZFP57	0	0	1.19679e-144	0	0.0588626	0.60449	0.416857	0.0762173	0.0611459	0.000203325	0.000108587	0.833234
LAMC3	0	0	1.16779e-144	0	0.0599865	0.607359	0.417548	0.0781024	0.0611982	-5.19745e-05	2.7763e-05	0.833234
FAM98B	0	0	1.46556e-144	0	0.0596393	0.60307	0.421731	0.0796734	0.061216	-0.000147088	7.85749e-05	0.833234
METTL21A	0	0	1.12039e-144	0	0.0585545	0.60809	0.424356	0.0773147	0.0612487	0.000184258	9.84434e-05	0.833234
FAU	0	0	9.32191e-145	0	0.0592559	0.598314	0.422836	0.0761381	0.0613516	-0.000638956	0.000341511	0.833635
HIST2H2BF	0	0	8.87337e-145	0	0.0591062	0.605057	0.423058	0.0794155	0.061491	0.000308281	0.000164859	0.833635
PECR	0	0	1.02826e-144	0	0.060234	0.598338	0.414537	0.0772907	0.061505	-0.000180976	9.67855e-05	0.833635
SFMBT1	0	0	9.97316e-145	0	0.0602712	0.600314	0.420097	0.074465	0.0615139	0.000163721	8.75609e-05	0.833635
STK32B	0	0	9.24399e-145	0	0.0597537	0.603541	0.419831	0.0753602	0.0615396	-0.000152803	8.17298e-05	0.833635
DHRS3	0	0	1.16753e-144	0	0.0597063	0.604605	0.41543	0.0789134	0.0615477	0.000118267	6.32595e-05	0.833635
PNPLA1	0	0	9.56021e-145	0	0.059425	0.60292	0.42074	0.0787953	0.061668	0.000164945	8.82674e-05	0.83412
C17orf100	0	0	1.25058e-144	0	0.0594779	0.599451	0.420019	0.0779385	0.0616991	0.000327962	0.000175524	0.83412
CACNB2	0	0	1.02645e-144	0	0.0595417	0.597182	0.423084	0.0778345	0.0617321	-7.91709e-05	4.23775e-05	0.83412
PON2	0	0	9.97814e-145	0	0.058996	0.605012	0.419417	0.0772663	0.0617633	-0.000251241	0.000134497	0.83412
EPB41L2	0	0	1.28991e-144	0	0.0609719	0.602103	0.41434	0.0799538	0.0619201	7.08066e-05	3.79277e-05	0.835437
ZBTB9	0	0	8.68781e-145	0	0.0590334	0.599301	0.421213	0.0763756	0.0619932	-0.000228025	0.000122176	0.835437
COMMD10	0	0	9.58901e-145	0	0.0597771	0.607128	0.416323	0.0753632	0.0619959	-0.000337871	0.000181034	0.835437
MAPKAPK2	0	0	1.05402e-144	0	0.0600048	0.603954	0.417609	0.0746281	0.0620854	0.000280042	0.0001501	0.835708
TPRG1L	0	0	1.07415e-144	0	0.0580624	0.597368	0.425988	0.07834	0.0622229	6.41057e-05	3.43782e-05	0.835708
EXOC1	0	0	1.68662e-144	0	0.0600855	0.599182	0.416077	0.0771485	0.0622736	-8.60136e-05	4.61358e-05	0.835708
CELF6	0	0	9.44735e-145	0	0.0580616	0.614737	0.422817	0.0756884	0.0623039	-0.000255899	0.000137274	0.835708
NRG3	0	0	1.1264e-144	0	0.0591465	0.605368	0.413967	0.080127	0.0623192	9.79446e-05	5.25444e-05	0.835708
DET1	0	0	1.03454e-144	0	0.0607329	0.606943	0.415421	0.0766303	0.0623589	-0.000159727	8.57021e-05	0.835708
PDXK	0	0	1.12346e-144	0	0.0594294	0.603098	0.415613	0.0771247	0.0623608	-0.000215363	0.000115554	0.835708
KLF15	0	0	9.80605e-145	0	0.0594895	0.598382	0.414957	0.0771973	0.0623942	0.000240702	0.000129167	0.835708
DLC1	0	0	1.11834e-144	0	0.0593317	0.600052	0.416417	0.0753187	0.0626732	-8.01262e-05	4.30434e-05	0.835708
YBX1	0	0	8.95713e-145	0	0.0580401	0.598608	0.419633	0.0776872	0.0627351	0.000262833	0.000141226	0.835708
FIS1	0	0	1.1479e-144	0	0.0595933	0.599076	0.422346	0.0750928	0.0627441	-0.000147445	7.9228e-05	0.835708
HPSE2	0	0	9.52006e-145	0	0.0594256	0.599003	0.423664	0.076514	0.0627531	-6.89709e-05	3.70621e-05	0.835708
BICRA	0	0	9.09916e-145	0	0.0597408	0.604894	0.417367	0.0769209	0.0628423	8.29575e-05	4.45931e-05	0.835708
MAB21L1	0	0	1.00868e-144	0	0.0610147	0.601784	0.42039	0.0755208	0.062855	-0.000302917	0.000162838	0.835708
CFLAR	0	0	9.63586e-145	0	0.0594165	0.604133	0.421554	0.0750228	0.0628597	-0.000447331	0.000240475	0.835708
SLC6A12	0	0	8.9167e-145	0	0.0591415	0.603095	0.421357	0.0770139	0.0628995	0.000121972	6.55792e-05	0.835708
ALKAL2	0	0	8.42301e-145	0	0.0588021	0.597332	0.421971	0.0773837	0.0629184	0.000443648	0.000238548	0.835708
ZNF2	0	0	1.12779e-144	0	0.0602112	0.607751	0.424857	0.0750381	0.0629313	-0.000223909	0.000120401	0.835708
NPHP3	0	0	1.00385e-144	0	0.0591259	0.609298	0.415341	0.0786757	0.0629901	5.43518e-05	2.92328e-05	0.835708
RPL38	0	0	8.14258e-145	0	0.0592873	0.602637	0.42273	0.0765009	0.0630401	0.00140597	0.000756335	0.835708
GJA8	0	0	1.24645e-144	0	0.0601557	0.603662	0.415542	0.078352	0.0630418	0.000131759	7.08796e-05	0.835708
CFAP65	0	0	1.13462e-144	0	0.0591714	0.611975	0.419869	0.0733074	0.0630565	-7.49916e-05	4.03439e-05	0.835708
CCL19	0	0	9.50668e-145	0	0.0595911	0.606964	0.419468	0.0761389	0.0631148	-0.000612617	0.000329648	0.835708
CWC22	0	0	1.06076e-144	0	0.0598179	0.605909	0.420748	0.0739676	0.0632146	-0.000128834	6.93517e-05	0.835708
PLA2G2E	0	0	7.30249e-145	0	0.0591677	0.607332	0.418632	0.0763892	0.0632222	-0.00037321	0.000200906	0.835708
EDDM3B	0	0	1.16126e-144	0	0.0594171	0.603057	0.422469	0.0752636	0.0632374	-0.00036908	0.000198693	0.835708
ZNF175	0	0	1.07075e-144	0	0.0587125	0.602556	0.423661	0.0752994	0.0632712	-0.000221467	0.000119242	0.835708
MEGF10	0	0	1.02756e-144	0	0.0598981	0.60387	0.424131	0.0750807	0.0632859	7.47458e-05	4.02466e-05	0.835708
NAB1	0	0	9.57985e-145	0	0.0584125	0.601527	0.418848	0.0760859	0.0633221	0.000188661	0.000101598	0.835708
USP4	0	0	9.56766e-145	0	0.0606618	0.601367	0.421931	0.07728	0.0634912	-0.000111118	5.98774e-05	0.837344
SPINT2	0	0	1.12402e-144	0	0.0588131	0.599669	0.418998	0.071336	0.0635603	-0.000202498	0.000109148	0.837659
ID2	0	0	1.13604e-144	0	0.0590603	0.601182	0.419578	0.0760487	0.0636529	0.000380996	0.000205431	0.837684
AMPD1	0	0	1.45138e-144	0	0.0598097	0.601908	0.418762	0.0729115	0.0636531	-7.89771e-05	4.25841e-05	0.837684
NTSR2	0	0	1.06926e-144	0	0.0589097	0.597136	0.421824	0.0764494	0.0636976	0.000136412	7.35652e-05	0.837684
TAGAP	0	0	8.79773e-145	0	0.058263	0.604819	0.422318	0.0737645	0.0638125	-0.000241248	0.000130158	0.838302
VPS54	0	0	8.79414e-145	0	0.0604535	0.605478	0.41733	0.0776791	0.0638581	-0.000108206	5.83894e-05	0.838302
HNRNPR	0	0	9.56481e-145	0	0.0584797	0.59882	0.423077	0.0758343	0.0638801	0.000361845	0.000195272	0.838302
STK17A	0	0	7.55368e-145	0	0.0591675	0.605645	0.420668	0.0776014	0.063964	0.00023036	0.000124355	0.83881
OOEP	0	0	1.03731e-144	0	0.0586635	0.606273	0.420205	0.0762524	0.064218	0.000561063	0.000303166	0.841264
ZNF112	0	0	1.08272e-144	0	0.0599259	0.600737	0.423069	0.0749371	0.0642807	-0.000243622	0.00013167	0.841264
NOMO1	0	0	8.70735e-145	0	0.0588862	0.598671	0.420651	0.077512	0.0643246	-0.00014493	7.8343e-05	0.841264
ZNF581	0	0	9.65506e-145	0	0.0597862	0.606476	0.414604	0.0775257	0.0643645	-0.000323497	0.000174895	0.841264
PRPF40A	0	0	1.03034e-144	0	0.059392	0.599227	0.416226	0.074928	0.0644048	-0.00024738	0.000133763	0.841264
GALNT8	0	0	8.73606e-145	0	0.0589436	0.604451	0.42318	0.0743732	0.0645748	7.08883e-05	3.83552e-05	0.841264
SMAD2	0	0	8.84979e-145	0	0.0602072	0.60707	0.42232	0.0749986	0.0646685	-0.000355603	0.000192472	0.841264
CPA4	0	0	1.08226e-144	0	0.0599952	0.602176	0.426384	0.076286	0.0646878	-5.46122e-05	2.95613e-05	0.841264
RNF157	0	0	1.03459e-144	0	0.0596435	0.601076	0.414952	0.0739299	0.064759	0.000116128	6.28762e-05	0.841264
ASPRV1	0	0	1.03478e-144	0	0.0603231	0.594848	0.422259	0.0797883	0.0647991	0.000224911	0.000121793	0.841264
ARMC5	0	0	8.78922e-145	0	0.0593093	0.599655	0.423799	0.07891	0.0648341	9.51457e-05	5.15299e-05	0.841264
KIF18A	0	0	1.15057e-144	0	0.0596372	0.605277	0.426646	0.0761105	0.0648593	0.000125069	6.77424e-05	0.841264
USP34	0	0	1.0737e-144	0	0.0589895	0.597142	0.418779	0.075995	0.0648936	-8.43929e-05	4.57165e-05	0.841264
SEPSECS	0	0	9.25186e-145	0	0.0582674	0.607759	0.421373	0.075084	0.0649855	-0.00020151	0.000109198	0.841264
WDR78	0	0	1.24374e-144	0	0.0594735	0.602936	0.415501	0.0766054	0.0649906	-0.000146054	7.91473e-05	0.841264
TMEM229A	0	0	7.57295e-145	0	0.0586675	0.595072	0.41882	0.0759169	0.0650472	-0.000221754	0.000120195	0.841264
ARAP1	0	0	1.01051e-144	0	0.0586141	0.598563	0.418581	0.0724804	0.0650502	-8.22886e-05	4.46026e-05	0.841264
PLEKHM1	0	0	8.86757e-145	0	0.0589715	0.605941	0.417439	0.0759064	0.0650761	-0.000114201	6.19058e-05	0.841264
PAGE2	0	0	1.09238e-144	0	0.0596226	0.599201	0.420284	0.0780786	0.0650999	0.000788773	0.000427615	0.841264
RXFP3	0	0	9.12084e-145	0	0.0592523	0.603326	0.416605	0.0765217	0.0651428	-0.000225749	0.000122404	0.841264
UGT2A1	0	0	8.18533e-145	0	0.0590732	0.603758	0.418982	0.0739164	0.0652121	0.000279261	0.000151458	0.841264
CDNF	0	0	1.05759e-144	0	0.0592063	0.602344	0.420881	0.0774006	0.0653284	0.000244722	0.000132783	0.841264
ZFAND5	0	0	1.30209e-144	0	0.0593017	0.601118	0.419402	0.0763204	0.0653946	0.000712217	0.000386535	0.841264
PTGER2	0	0	8.15339e-145	0	0.0595627	0.604229	0.41817	0.0776903	0.0653963	9.92768e-05	5.388e-05	0.841264
YIPF1	0	0	1.13056e-144	0	0.059548	0.605511	0.421037	0.0748236	0.0654396	-0.000181865	9.87183e-05	0.841264
NOL11	0	0	1.09705e-144	0	0.0593651	0.598226	0.418677	0.0759752	0.0654521	9.83311e-05	5.33778e-05	0.841264
TBATA	0	0	1.25711e-144	0	0.0596169	0.60166	0.420876	0.0761811	0.0654898	-0.000180462	9.79755e-05	0.841264
NANOS2	0	0	1.00794e-144	0	0.0592481	0.600711	0.422494	0.0760827	0.0655124	0.000285016	0.000154752	0.841264
OXGR1	0	0	1.05441e-144	0	0.0595573	0.603336	0.418333	0.0738789	0.0656601	-0.000170499	9.26245e-05	0.841264
WRAP73	0	0	9.39901e-145	0	0.058659	0.600748	0.41931	0.0739141	0.0656788	-0.000118611	6.44408e-05	0.841264
MCMDC2	0	0	8.82347e-145	0	0.0602477	0.603342	0.419879	0.0769268	0.0656809	0.00016743	9.09646e-05	0.841264
MBNL1	0	0	9.11403e-145	0	0.0589863	0.606373	0.420813	0.0762007	0.0656818	-0.000387684	0.000210629	0.841264
PCDH17	0	0	1.0655e-144	0	0.0589234	0.595303	0.419644	0.0768261	0.0657194	0.000150081	8.15504e-05	0.841264
R3HDML	0	0	8.25504e-145	0	0.0599171	0.595925	0.419969	0.0722295	0.0657279	0.000196539	0.000106798	0.841264
CCDC184	0	0	1.1184e-144	0	0.0595493	0.603517	0.413787	0.0759555	0.0657379	-0.000316042	0.000171742	0.841264
FAM135B	0	0	1.25901e-144	0	0.0597838	0.602011	0.417936	0.0776091	0.0657901	-0.000142603	7.75072e-05	0.841351
UBE2H	0	0	1.33704e-144	0	0.0598959	0.600366	0.417161	0.0763799	0.0658381	-0.00158128	0.000859608	0.841385
KIAA1841	0	0	7.93823e-145	0	0.0595511	0.604025	0.417816	0.0745651	0.0659286	-0.000135821	7.38587e-05	0.841452
TXNL1	0	0	1.05719e-144	0	0.0587493	0.601406	0.42579	0.0772467	0.0659368	0.00033254	0.000180839	0.841452
DENND4B	0	0	9.42561e-145	0	0.0596084	0.600324	0.420695	0.0761888	0.0659793	0.000114711	6.2391e-05	0.841452
SH2D5	0	0	8.9817e-145	0	0.060359	0.606395	0.418328	0.0786996	0.0664247	9.60317e-05	5.23173e-05	0.84164
TUBA1A	0	0	1.04554e-144	0	0.0592037	0.602833	0.421709	0.0763978	0.0666601	0.000843631	0.000460002	0.84164
IGDCC3	0	0	1.05245e-144	0	0.0581101	0.600374	0.42069	0.0784407	0.0666779	7.8429e-05	4.27673e-05	0.84164
SRSF5	0	0	1.29438e-144	0	0.0593582	0.598295	0.419993	0.078247	0.0666791	0.000197649	0.000107778	0.84164
LCN15	0	0	1.05423e-144	0	0.0594176	0.599612	0.416274	0.07647	0.0667064	-0.00022242	0.000121298	0.84164
ITCH	0	0	8.95484e-145	0	0.0593625	0.594332	0.419412	0.0765678	0.0667067	-0.000244402	0.000133286	0.84164
SLC2A7	0	0	1.05733e-144	0	0.0596364	0.605542	0.420506	0.0763595	0.0667106	-6.87199e-05	3.74775e-05	0.84164
SLC3A1	0	0	8.96987e-145	0	0.0607742	0.607901	0.411564	0.0773936	0.0667152	6.76514e-05	3.68953e-05	0.84164
PDCL3	0	0	1.34198e-144	0	0.0589067	0.606439	0.42152	0.0739517	0.066811	0.000112725	6.1499e-05	0.84164
MTMR6	0	0	1.2244e-144	0	0.0593876	0.604696	0.418213	0.0793218	0.066884	0.000164284	8.96516e-05	0.84164
CA14	0	0	9.46045e-145	0	0.0597281	0.597023	0.420489	0.0772902	0.0669201	-0.000161286	8.80273e-05	0.84164
IL10RB	0	0	9.2025e-145	0	0.0588231	0.599763	0.417265	0.0783651	0.0669622	0.000276421	0.000150889	0.84164
FBXL15	0	0	8.45996e-145	0	0.0600585	0.601608	0.418908	0.0750518	0.0669844	-0.00017277	9.43172e-05	0.84164
RBKS	0	0	9.5139e-145	0	0.0602664	0.596997	0.417187	0.0780817	0.066996	-0.000162512	8.87213e-05	0.84164
FAM9B	0	0	8.47351e-145	0	0.0591512	0.601487	0.421948	0.0756183	0.0671366	-0.000742882	0.000405775	0.84164
AVL9	0	0	1.00237e-144	0	0.0591624	0.603641	0.419779	0.0769013	0.0671601	0.000146988	8.02942e-05	0.84164
WDFY3	0	0	1.08359e-144	0	0.0596196	0.601898	0.416172	0.0738723	0.0672137	-8.88098e-05	4.85232e-05	0.84164
MAP3K15	0	0	9.84392e-145	0	0.0598435	0.595299	0.418965	0.0725556	0.0672702	-5.68103e-05	3.10459e-05	0.84164
STAT6	0	0	8.66297e-145	0	0.0606152	0.597313	0.418977	0.0756639	0.0672718	-0.000202947	0.000110908	0.84164
IRF2	0	0	7.77085e-145	0	0.0583939	0.60167	0.424833	0.0775889	0.0673051	-0.000293129	0.000160211	0.84164
PLPPR2	0	0	9.91749e-145	0	0.0601722	0.597101	0.41844	0.0743956	0.0673291	-0.0001894	0.000103526	0.84164
GRM7	0	0	9.58045e-145	0	0.0595588	0.601623	0.420087	0.0779544	0.0673684	-0.000148564	8.12172e-05	0.84164
TAF13	0	0	1.17111e-144	0	0.060015	0.603579	0.418567	0.0768146	0.0673814	-0.000316841	0.000173219	0.84164
CLCA4	0	0	1.01494e-144	0	0.05941	0.597112	0.420759	0.0771775	0.067405	0.000104636	5.72098e-05	0.84164
SPTBN1	0	0	1.0907e-144	0	0.058609	0.599973	0.416132	0.0782182	0.0675182	-8.41162e-05	4.60098e-05	0.84164
FLI1	0	0	8.94284e-145	0	0.0604469	0.596904	0.420975	0.0775675	0.0675852	0.000203689	0.000111441	0.84164
CLEC4E	0	0	8.65782e-145	0	0.0598448	0.600051	0.422176	0.0761632	0.0675988	-0.000395935	0.000216632	0.84164
TBC1D4	0	0	9.54776e-145	0	0.0597281	0.60201	0.419627	0.0761524	0.0676266	-0.000102059	5.58461e-05	0.84164
SLC15A2	0	0	1.16221e-144	0	0.058704	0.603556	0.421661	0.0756413	0.0676534	0.000145275	7.95016e-05	0.84164
CAVIN2	0	0	9.46879e-145	0	0.0585149	0.597804	0.421093	0.0799396	0.0677317	-0.000125475	6.86855e-05	0.84164
PDCD1	0	0	1.00004e-144	0	0.059551	0.603725	0.415293	0.0770224	0.0677642	-0.000504011	0.00027593	0.84164
GFOD2	0	0	1.01969e-144	0	0.0588275	0.600243	0.421541	0.0791019	0.0677848	-0.000168334	9.21643e-05	0.84164
METTL12	0	0	8.10325e-145	0	0.0592943	0.603063	0.417929	0.0762457	0.0677871	0.000124233	6.80193e-05	0.84164
IL4I1	0	0	1.19695e-144	0	0.0593325	0.603329	0.421494	0.0736773	0.0678968	-0.000107407	5.88306e-05	0.84164
BICD1	0	0	1.24915e-144	0	0.0590387	0.601365	0.415695	0.0775445	0.0679187	-0.000135902	7.44438e-05	0.84164
SERPINF2	0	0	1.15387e-144	0	0.0597061	0.597517	0.421154	0.0763979	0.0679234	0.000262283	0.000143675	0.84164
TCTN1	0	0	8.83632e-145	0	0.0589856	0.599586	0.427762	0.0742926	0.0679248	-0.000134266	7.35495e-05	0.84164
SIPA1L3	0	0	1.12664e-144	0	0.0600443	0.605294	0.415701	0.0737386	0.0680191	-6.2647e-05	3.43291e-05	0.84164
RNPEP	0	0	1.22337e-144	0	0.0589974	0.601381	0.420039	0.0756426	0.0681519	0.00010446	5.72691e-05	0.84164
PRMT2	0	0	1.02381e-144	0	0.0592205	0.602005	0.418339	0.0787328	0.0682071	-0.000134927	7.39871e-05	0.84164
KHK	0	0	7.80494e-145	0	0.0591601	0.599787	0.41851	0.0768364	0.0682918	0.000114304	6.2698e-05	0.84164
FYTTD1	0	0	1.01389e-144	0	0.0595866	0.604564	0.421281	0.0774254	0.068294	-0.000170781	9.36771e-05	0.84164
STARD3	0	0	1.21024e-144	0	0.0582195	0.601227	0.425394	0.0772535	0.0683477	0.00012789	7.01641e-05	0.84164
TMEM65	0	0	1.24969e-144	0	0.0588189	0.606179	0.415104	0.0777124	0.0684401	0.000370429	0.000203297	0.84164
ST18	0	0	8.33024e-145	0	0.0587825	0.60323	0.424389	0.0747757	0.0684717	-7.0626e-05	3.87649e-05	0.84164
BAHCC1	0	0	8.245e-145	0	0.0602732	0.603198	0.423532	0.0769682	0.0685009	-0.000336453	0.000184691	0.84164
GHDC	0	0	1.01428e-144	0	0.0602604	0.601933	0.418188	0.0771159	0.0685149	-0.000132617	7.28019e-05	0.84164
ASB11	0	0	1.03909e-144	0	0.0599033	0.595112	0.424503	0.0761238	0.0686798	-0.000118129	6.4887e-05	0.84164
SH3BP5L	0	0	9.53256e-145	0	0.0607605	0.606538	0.414243	0.0763771	0.0687294	0.000167313	9.19196e-05	0.84164
CCDC17	0	0	1.22704e-144	0	0.0575394	0.597718	0.421445	0.0761438	0.0687874	-9.06774e-05	4.98274e-05	0.84164
KIAA0895L	0	0	9.87606e-145	0	0.060513	0.601987	0.415526	0.0769861	0.0688792	0.000156981	8.62902e-05	0.84164
CRTAC1	0	0	1.334e-144	0	0.0585162	0.598472	0.426968	0.0749942	0.0689325	-6.64577e-05	3.65378e-05	0.84164
GPD2	0	0	1.11226e-144	0	0.0595508	0.600513	0.418969	0.0731038	0.0689928	-7.31091e-05	4.02034e-05	0.84164
RYR3	0	0	1.01454e-144	0	0.0607436	0.605868	0.420099	0.079338	0.069002	-3.87278e-05	2.12975e-05	0.84164
ZNF500	0	0	9.62675e-145	0	0.0594796	0.601699	0.416833	0.0781643	0.0690149	-0.000142881	7.8578e-05	0.84164
TFAP2E	0	0	1.03287e-144	0	0.0610374	0.599691	0.416714	0.0764585	0.0690265	-8.3121e-05	4.57146e-05	0.84164
ENDOG	0	0	1.10231e-144	0	0.0594484	0.602188	0.424118	0.074402	0.0690298	0.000109359	6.01453e-05	0.84164
MYH7	0	0	9.02114e-145	0	0.0592063	0.607601	0.412075	0.0764581	0.0690352	-8.02285e-05	4.41251e-05	0.84164
OR51G2	0	0	1.08021e-144	0	0.0582223	0.609001	0.417045	0.0765617	0.0690715	-9.56866e-05	5.26339e-05	0.84164
LACRT	0	0	1.07279e-144	0	0.0589491	0.602992	0.42199	0.0752949	0.0690719	0.00125736	0.00069163	0.84164
STARD4	0	0	9.41322e-145	0	0.0602666	0.600111	0.422914	0.07381	0.0690933	-0.000213793	0.000117609	0.84164
KIR3DL3	0	0	9.45538e-145	0	0.0588548	0.597001	0.42327	0.0765189	0.0691507	0.000213785	0.000117629	0.84164
ANKRD53	0	0	9.23222e-145	0	0.0588882	0.598245	0.419716	0.0781579	0.0692222	-0.000240681	0.000132462	0.84164
ENAH	0	0	9.88338e-145	0	0.0599624	0.597084	0.420654	0.074416	0.0692225	-0.000169421	9.32434e-05	0.84164
GCGR	0	0	9.33913e-145	0	0.0590392	0.604542	0.424798	0.0750661	0.0693782	0.000130477	7.18499e-05	0.84164
HIBCH	0	0	9.54171e-145	0	0.0595046	0.608286	0.41936	0.0767015	0.0695042	-0.000151906	8.36881e-05	0.84164
C1orf131	0	0	1.27175e-144	0	0.0603535	0.603124	0.416373	0.07543	0.0695114	0.000292853	0.000161343	0.84164
HS2ST1	0	0	1.0152e-144	0	0.0593213	0.60258	0.422166	0.0767237	0.0697523	0.000255973	0.000141146	0.84164
IRF1	0	0	1.08047e-144	0	0.0604646	0.600981	0.419683	0.0751875	0.0697608	0.000406217	0.000223999	0.84164
SPPL2A	0	0	9.91323e-145	0	0.0584308	0.603475	0.417656	0.0785325	0.0698095	-0.00011551	6.37066e-05	0.84164
SNIP1	0	0	1.29474e-144	0	0.059317	0.602709	0.421567	0.077413	0.0698761	0.000228248	0.000125914	0.84164
PRICKLE3	0	0	1.05919e-144	0	0.0590956	0.598591	0.422556	0.0772682	0.0699354	-0.000254138	0.000140226	0.84164
CSN2	0	0	9.62535e-145	0	0.0588496	0.601871	0.419323	0.076575	0.069949	0.000455469	0.000251327	0.84164
BEND5	0	0	1.2464e-144	0	0.0585533	0.60079	0.415714	0.078378	0.0699536	-0.000183756	0.000101398	0.84164
C8orf86	0	0	1.51018e-144	0	0.0603251	0.602152	0.419756	0.0758656	0.0699801	0.000643871	0.000355327	0.84164
RPIA	0	0	1.03442e-144	0	0.0592871	0.607161	0.424182	0.0767741	0.0700256	0.000217516	0.000120058	0.84164
TMEM144	0	0	1.02881e-144	0	0.0599523	0.608276	0.421354	0.0762444	0.0700455	-0.000210101	0.000115973	0.84164
FLYWCH1	0	0	1.17327e-144	0	0.060078	0.605947	0.416244	0.0811459	0.0701009	6.98233e-05	3.85493e-05	0.84164
UBE2QL1	0	0	1.07777e-144	0	0.0595659	0.604166	0.419028	0.075946	0.0701642	-0.00123447	0.000681701	0.84164
KYAT1	0	0	1.04588e-144	0	0.0591309	0.604054	0.419935	0.0746595	0.0701891	-0.000146629	8.09793e-05	0.84164
SPHK2	0	0	1.00562e-144	0	0.0598522	0.600574	0.418609	0.077677	0.0702136	0.000120913	6.67827e-05	0.84164
HECA	0	0	9.55836e-145	0	0.0594795	0.603639	0.417707	0.077615	0.0702519	-0.000303594	0.000167704	0.84164
RPL4	0	0	9.0499e-145	0	0.0597927	0.603417	0.418339	0.0756419	0.0702798	0.0002628	0.000145184	0.84164
GTF3C2	0	0	1.04531e-144	0	0.0596431	0.601299	0.422919	0.0773429	0.0702928	0.000189321	0.000104595	0.84164
KRIT1	0	0	1.09841e-144	0	0.0590055	0.601107	0.416604	0.0752329	0.0703023	-0.000161538	8.92486e-05	0.84164
HPCAL4	0	0	8.86332e-145	0	0.0585622	0.595682	0.420845	0.0773293	0.07042	-0.00022222	0.000122827	0.84164
PSG4	0	0	8.41842e-145	0	0.0602268	0.603351	0.421736	0.0785967	0.0704252	0.000195685	0.000108162	0.84164
ALDH1L2	0	0	9.67995e-145	0	0.0596473	0.607385	0.421329	0.0766362	0.0704488	7.18767e-05	3.97322e-05	0.84164
BRIP1	0	0	1.00787e-144	0	0.0586528	0.598589	0.421228	0.0798381	0.0704672	-6.91412e-05	3.82226e-05	0.84164
UIMC1	0	0	9.39088e-145	0	0.0603909	0.608815	0.421682	0.0798128	0.070558	-9.275e-05	5.12905e-05	0.84164
SOX4	0	0	1.0668e-144	0	0.0588572	0.606363	0.418271	0.0748683	0.070631	-0.000108125	5.98083e-05	0.84164
PRRG4	0	0	1.10392e-144	0	0.0597774	0.59817	0.423045	0.0763216	0.0706831	-0.00034708	0.00019202	0.84164
CDHR2	0	0	9.48058e-145	0	0.05941	0.598519	0.42321	0.075891	0.0707082	6.99307e-05	3.86922e-05	0.84164
PGR	0	0	1.00925e-144	0	0.0598579	0.602497	0.42686	0.0743438	0.0707094	0.000163073	9.02277e-05	0.84164
ITSN1	0	0	1.0525e-144	0	0.0594765	0.601147	0.4171	0.0769728	0.0707101	0.00011322	6.2644e-05	0.84164
TPRN	0	0	9.18561e-145	0	0.0599009	0.599296	0.421206	0.0764389	0.0707198	8.52613e-05	4.71764e-05	0.84164
LOC100996693	0	0	1.16415e-144	0	0.0604689	0.601995	0.419054	0.0786044	0.070723	-0.000301452	0.0001668	0.84164
JMY	0	0	1.21999e-144	0	0.0596182	0.60202	0.422843	0.0748848	0.0707646	8.90046e-05	4.92555e-05	0.84164
RTL8B	0	0	9.39132e-145	0	0.0597167	0.599599	0.423093	0.0769938	0.0707779	0.000542426	0.000300194	0.84164
DIDO1	0	0	9.56318e-145	0	0.0587444	0.603694	0.417642	0.072289	0.070784	9.36152e-05	5.18106e-05	0.84164
ZNF652	0	0	1.12285e-144	0	0.058622	0.602903	0.420958	0.0781987	0.0707947	0.000218752	0.000121071	0.84164
C11orf52	0	0	8.94758e-145	0	0.0600906	0.602768	0.416876	0.0747792	0.0708	-0.000275471	0.000152466	0.84164
ZNF219	0	0	9.60671e-145	0	0.0607583	0.601215	0.419076	0.0737333	0.0708125	-0.000171558	9.4957e-05	0.84164
KRBA1	0	0	1.0716e-144	0	0.0599574	0.604727	0.416809	0.0743995	0.0708499	7.79545e-05	4.31533e-05	0.84164
ATL1	0	0	9.58895e-145	0	0.0596279	0.603993	0.418592	0.0777713	0.0708732	-0.000326508	0.00018076	0.84164
KRT17	0	0	1.05406e-144	0	0.0593865	0.607535	0.416146	0.074619	0.07089	-0.000147408	8.16122e-05	0.84164
CEP162	0	0	1.24257e-144	0	0.0592521	0.602985	0.424599	0.0747628	0.070937	-7.6048e-05	4.2111e-05	0.84164
ISOC2	0	0	1.04498e-144	0	0.0597803	0.60412	0.418737	0.0754389	0.0709859	0.000131859	7.30287e-05	0.84164
C2orf15	0	0	8.90535e-145	0	0.0590861	0.597906	0.413261	0.0763574	0.071008	-0.00134715	0.000746159	0.84164
IFI44L	0	0	9.92378e-145	0	0.0586524	0.596802	0.42137	0.0797989	0.0711747	6.85938e-05	3.80153e-05	0.84164
YWHAG	0	0	1.03977e-144	0	0.0600938	0.603391	0.416259	0.0751179	0.071205	-0.000508109	0.000281629	0.84164
MAN1A2	0	0	9.55478e-145	0	0.0600345	0.601919	0.416325	0.0767089	0.0712527	0.000225999	0.000125285	0.84164
ZNF70	0	0	1.12286e-144	0	0.0592476	0.602339	0.418172	0.0767414	0.0712558	-0.000148354	8.22424e-05	0.84164
OR5C1	0	0	1.32757e-144	0	0.0593496	0.59887	0.425505	0.0777968	0.071258	0.000148883	8.25364e-05	0.84164
FNIP1	0	0	9.82825e-145	0	0.0590708	0.603614	0.419979	0.077103	0.0712997	9.07792e-05	5.03328e-05	0.84164
TIFA	0	0	1.04318e-144	0	0.0600446	0.600944	0.419957	0.0782259	0.0713282	0.00026454	0.00014669	0.84164
FLVCR1	0	0	1.07691e-144	0	0.0604159	0.602935	0.419951	0.0752515	0.0714078	-0.000176471	9.78825e-05	0.84164
PCSK1N	0	0	9.4874e-145	0	0.0587829	0.597019	0.421839	0.0768271	0.0714253	0.000357244	0.000198163	0.84164
PTPN4	0	0	1.07015e-144	0	0.0596021	0.597086	0.425605	0.0764425	0.0714329	-0.000114465	6.34955e-05	0.84164
CHPF2	0	0	9.26223e-145	0	0.0601194	0.599655	0.427118	0.0739444	0.0714369	-5.87886e-05	3.26113e-05	0.84164
FRMD4A	0	0	1.04594e-144	0	0.0607377	0.603292	0.418961	0.0787097	0.0716283	-9.97355e-05	5.53629e-05	0.843359
GTF2F1	0	0	1.0593e-144	0	0.0595529	0.59883	0.420689	0.0740759	0.0717775	-0.000132015	7.33197e-05	0.844581
ZNF645	0	0	1.02471e-144	0	0.0597881	0.602485	0.41928	0.0762835	0.0718382	-0.000605196	0.000336191	0.844697
PTAFR	0	0	1.11203e-144	0	0.06019	0.59961	0.425418	0.077798	0.0718785	0.000186276	0.000103492	0.844697
ARHGEF38	0	0	1.07611e-144	0	0.0600099	0.602079	0.421776	0.0798669	0.072052	0.000124385	6.91487e-05	0.845117
GUCY2C	0	0	1.03081e-144	0	0.0609519	0.599085	0.413133	0.0746506	0.072074	-0.000102907	5.72132e-05	0.845117
KCNJ9	0	0	8.18985e-145	0	0.0611182	0.597914	0.420677	0.0758145	0.072173	0.000350301	0.000194824	0.845117
FLII	0	0	1.04421e-144	0	0.0605459	0.60473	0.416637	0.0753368	0.072198	-6.9319e-05	3.85559e-05	0.845117
TOMM40	0	0	1.10216e-144	0	0.0583569	0.605677	0.423243	0.0791863	0.0722648	-0.000130925	7.2839e-05	0.845117
EIF4E	0	0	1.14886e-144	0	0.0606021	0.605677	0.418744	0.0763204	0.0723302	0.000522162	0.000290567	0.845117
PPFIA3	0	0	7.67617e-145	0	0.0597748	0.597386	0.423461	0.0772358	0.072341	-0.000164316	9.14398e-05	0.845117
SPANXC	0	0	1.1086e-144	0	0.0594376	0.606887	0.41587	0.0759328	0.0723979	-0.000912972	0.00050816	0.845117
PARK7	0	0	1.01859e-144	0	0.0595229	0.601418	0.419228	0.074705	0.0724112	-0.000243694	0.000135646	0.845117
SRXN1	0	0	7.54771e-145	0	0.0599174	0.603423	0.418981	0.0730849	0.0724947	0.000192291	0.000107065	0.845117
OR5M1	0	0	9.33612e-145	0	0.0592981	0.599206	0.418226	0.0788745	0.0725049	0.000134313	7.47866e-05	0.845117
ECI1	0	0	8.65993e-145	0	0.0595258	0.59629	0.420994	0.0780116	0.0726596	-7.41805e-05	4.13267e-05	0.845117
TP53RK	0	0	1.06238e-144	0	0.0599446	0.606111	0.415762	0.0758818	0.072759	0.000292276	0.000162886	0.845117
MMRN1	0	0	9.34864e-145	0	0.0602754	0.599866	0.417185	0.0767963	0.0727832	-7.15511e-05	3.9879e-05	0.845117
DIAPH3	0	0	1.08803e-144	0	0.0594186	0.599688	0.418759	0.075401	0.0727912	5.75995e-05	3.2104e-05	0.845117
LHFPL2	0	0	8.97994e-145	0	0.0593848	0.6034	0.414923	0.0763565	0.0728057	-0.000137825	7.68232e-05	0.845117
TAS1R1	0	0	8.15158e-145	0	0.0606515	0.599315	0.421327	0.0746738	0.0728475	-5.983e-05	3.33538e-05	0.845117
AAED1	0	0	1.11315e-144	0	0.059338	0.594238	0.418767	0.0795736	0.0728476	0.000146256	8.15345e-05	0.845117
LYZL2	0	0	1.01288e-144	0	0.0596825	0.601501	0.422945	0.0765762	0.0728672	-0.000219515	0.000122383	0.845117
ZMYND12	0	0	1.30691e-144	0	0.0591029	0.601385	0.418176	0.0787739	0.0728697	0.000171021	9.53473e-05	0.845117
ATP6V0A4	0	0	9.37545e-145	0	0.0596237	0.602805	0.422046	0.0772106	0.0729092	0.000117873	6.57255e-05	0.845117
ATXN2	0	0	1.0191e-144	0	0.059961	0.598465	0.413794	0.0772381	0.0729162	-0.000148393	8.27456e-05	0.845117
TMX3	0	0	1.03555e-144	0	0.0586799	0.601091	0.41958	0.0791191	0.0731161	-0.000209406	0.000116848	0.846906
OTX2	0	0	8.88971e-145	0	0.0585455	0.600531	0.424831	0.0775327	0.0731997	-0.000304131	0.000169754	0.847286
CPA2	0	0	9.88417e-145	0	0.0588289	0.604794	0.419286	0.0779688	0.0732403	-0.00012646	7.05953e-05	0.847286
MARF1	0	0	1.06118e-144	0	0.0596767	0.601794	0.420814	0.0754768	0.0734114	5.42522e-05	3.03038e-05	0.847988
HOXD1	0	0	9.14798e-145	0	0.0587193	0.605758	0.418025	0.0772508	0.0734505	-0.00015267	8.5289e-05	0.847988
UQCRH	0	0	9.58318e-145	0	0.0593148	0.601129	0.422666	0.0754084	0.0734609	-0.00048385	0.000270311	0.847988
TPSB2	0	0	1.06036e-144	0	0.0601326	0.600323	0.421779	0.0767741	0.0734862	-0.000125802	7.02877e-05	0.847988
SMG1	0	0	1.15947e-144	0	0.0577152	0.6011	0.420822	0.0766736	0.0735294	-7.99994e-05	4.47038e-05	0.847988
OR6C1	0	0	9.46309e-145	0	0.0581891	0.606614	0.417175	0.0746975	0.0736037	-0.000146587	8.19339e-05	0.848317
SRCIN1	0	0	9.57243e-145	0	0.0592982	0.600898	0.418846	0.0765265	0.0737049	-9.68284e-05	5.41408e-05	0.848369
KIF2B	0	0	1.05919e-144	0	0.0593595	0.602874	0.41384	0.0776684	0.0737444	-8.83643e-05	4.9415e-05	0.848369
GALNT9	0	0	1.19282e-144	0	0.0597103	0.596955	0.418197	0.0771725	0.0737812	-0.000110866	6.20063e-05	0.848369
ALAS1	0	0	1.07397e-144	0	0.0609183	0.603628	0.424224	0.072794	0.0739858	9.47629e-05	5.30375e-05	0.848369
FYCO1	0	0	9.02242e-145	0	0.058842	0.604381	0.427402	0.0757969	0.0739994	-7.31311e-05	4.09324e-05	0.848369
GUCA1B	0	0	8.64287e-145	0	0.0594459	0.604882	0.414535	0.0760407	0.0740446	0.000166459	9.31835e-05	0.848369
PIGF	0	0	1.045e-144	0	0.0590073	0.596452	0.423747	0.0771069	0.0740683	-0.000339745	0.000190205	0.848369
CEACAM5	0	0	9.36454e-145	0	0.0595332	0.599275	0.419455	0.0747213	0.0740759	-0.000222487	0.000124562	0.848369
SPRR2A	0	0	1.16829e-144	0	0.0591904	0.60604	0.416481	0.0766351	0.0741293	-0.000745778	0.000417609	0.848369
MAP3K14	0	0	8.26601e-145	0	0.0606791	0.607804	0.417004	0.0761695	0.0741644	0.000303034	0.000169709	0.848369
UCN2	0	0	1.24878e-144	0	0.0576753	0.599513	0.415924	0.0740622	0.0742	-0.00030301	0.000169716	0.848369
BARX2	0	0	9.75915e-145	0	0.0605383	0.604597	0.417324	0.0761869	0.0742222	0.000235406	0.000131861	0.848369
AKAP1	0	0	1.00596e-144	0	0.0591072	0.600888	0.41989	0.0765329	0.0743857	0.00013007	7.28991e-05	0.848369
HPR	0	0	8.54488e-145	0	0.0605826	0.602685	0.420209	0.075832	0.0743933	0.00011443	6.41354e-05	0.848369
SRGAP2B	0	0	1.01872e-144	0	0.0596712	0.602903	0.422976	0.075832	0.074511	-0.00131872	0.000739408	0.848369
ADAMTS12	0	0	8.28846e-145	0	0.0594956	0.602115	0.420824	0.0776969	0.0745198	8.32622e-05	4.66868e-05	0.848369
ADH4	0	0	8.6976e-145	0	0.0586989	0.601331	0.420375	0.0770097	0.0745297	0.000131569	7.37761e-05	0.848369
KMT2B	0	0	1.231e-144	0	0.0586039	0.60356	0.41815	0.076491	0.0746916	-8.27058e-05	4.64022e-05	0.848369
OXA1L	0	0	1.11225e-144	0	0.0597223	0.605786	0.416144	0.076516	0.0747024	-0.000115389	6.47417e-05	0.848369
SHH	0	0	1.09147e-144	0	0.0589781	0.604573	0.418778	0.0756207	0.0747457	-0.000381781	0.000214238	0.848369
C12orf74	0	0	9.93711e-145	0	0.0591494	0.599182	0.417894	0.0768494	0.0749344	-0.000173774	9.75775e-05	0.848369
SYT4	0	0	1.08527e-144	0	0.0603428	0.601282	0.413201	0.0743606	0.0750364	-0.000303001	0.000170201	0.848369
CTSS	0	0	9.7145e-145	0	0.059399	0.597147	0.423315	0.0773633	0.0750414	0.000301116	0.000169145	0.848369
RNH1	0	0	8.3821e-145	0	0.0595955	0.606864	0.41205	0.0758102	0.0750748	0.000104525	5.87214e-05	0.848369
RASA4B	0	0	8.1698e-145	0	0.0590205	0.598363	0.423784	0.076376	0.0751144	-0.000114269	6.42042e-05	0.848369
DCANP1	0	0	9.78835e-145	0	0.0597533	0.599717	0.41855	0.0754442	0.0752291	-0.000636876	0.000357981	0.848369
PIK3CG	0	0	9.70818e-145	0	0.0612035	0.59848	0.416641	0.0755974	0.0752538	0.000127887	7.18899e-05	0.848369
NDUFC2-KCTD14	0	0	1.08415e-144	0	0.0589246	0.601526	0.418227	0.0768295	0.0752806	0.00976085	0.00548743	0.848369
HMOX2	0	0	1.02803e-144	0	0.059331	0.601007	0.417012	0.0762483	0.0753291	0.000153642	8.63901e-05	0.848369
ZSCAN22	0	0	1.24511e-144	0	0.0590905	0.597048	0.409135	0.0784833	0.0754097	0.000149161	8.38935e-05	0.848369
TMC3	0	0	9.88352e-145	0	0.058919	0.598743	0.426616	0.0752265	0.0754689	7.15963e-05	4.02765e-05	0.848369
RPS3	0	0	9.27475e-145	0	0.0586581	0.601887	0.420495	0.0778353	0.0755411	0.000176007	9.90375e-05	0.848369
ZNF764	0	0	1.08064e-144	0	0.0590181	0.599692	0.418792	0.0752014	0.0755647	0.000114688	6.45389e-05	0.848369
KIAA1210	0	0	1.21744e-144	0	0.0604538	0.600983	0.422788	0.0746627	0.075599	0.000291791	0.00016422	0.848369
ARHGAP19	0	0	9.42174e-145	0	0.0581262	0.608706	0.414155	0.0756692	0.0756067	-0.000160286	9.02116e-05	0.848369
RASL11B	0	0	1.13058e-144	0	0.0592689	0.606003	0.421528	0.0753716	0.0757109	-0.000314915	0.000177302	0.848369
EIF1AD	0	0	1.24751e-144	0	0.0596496	0.604917	0.418327	0.0761947	0.0757235	-0.00041829	0.000235514	0.848369
GXYLT2	0	0	1.3296e-144	0	0.0591798	0.603387	0.421126	0.0768104	0.0758639	0.000144414	8.135e-05	0.848369
DDR1	0	0	1.52827e-144	0	0.0603494	0.607255	0.417766	0.0785444	0.0758899	9.01404e-05	5.07816e-05	0.848369
LAP3	0	0	1.06668e-144	0	0.0600412	0.601913	0.422554	0.0742426	0.0759057	-0.000137463	7.74453e-05	0.848369
CACTIN	0	0	9.72445e-145	0	0.0597897	0.607051	0.416611	0.0774489	0.0759283	0.000218333	0.000123016	0.848369
FMOD	0	0	9.68573e-145	0	0.0583098	0.600627	0.418212	0.0733101	0.0759401	-0.000135825	7.65313e-05	0.848369
RPN1	0	0	1.17807e-144	0	0.0590117	0.595508	0.421306	0.0735195	0.0759571	-8.53497e-05	4.80937e-05	0.848369
GNL1	0	0	1.03369e-144	0	0.059125	0.603933	0.423201	0.0786766	0.0759725	9.68016e-05	5.45496e-05	0.848369
GSX2	0	0	8.89988e-145	0	0.0600385	0.607865	0.414799	0.0754342	0.0759758	0.000330873	0.000186456	0.848369
TCEAL8	0	0	1.03428e-144	0	0.0594805	0.601645	0.423549	0.0779649	0.075986	-0.00135362	0.000762827	0.848369
GNB1L	0	0	1.09639e-144	0	0.0596781	0.605536	0.419426	0.0759203	0.0760967	0.000148021	8.34478e-05	0.848369
VENTX	0	0	1.07513e-144	0	0.0599873	0.599113	0.421689	0.0748852	0.0761904	-0.000282733	0.000159444	0.848369
TMEM38B	0	0	7.37036e-145	0	0.0602031	0.599577	0.421222	0.0750929	0.0762085	-0.000256286	0.000144539	0.848369
FAM86C1	0	0	1.20873e-144	0	0.0590092	0.604085	0.424845	0.071785	0.0762136	0.000250717	0.0001414	0.848369
MAGEE1	0	0	1.11823e-144	0	0.0597208	0.599499	0.42176	0.0777953	0.0763173	-0.000312922	0.000176545	0.848369
TARSL2	0	0	1.03719e-144	0	0.0600121	0.604021	0.423036	0.0737825	0.0763371	-0.000117443	6.62636e-05	0.848369
SMIM10	0	0	1.1121e-144	0	0.0593916	0.604276	0.421546	0.0779203	0.0763944	0.00108954	0.000614859	0.848369
EIF3J	0	0	1.18828e-144	0	0.059001	0.600754	0.416963	0.0792355	0.0765003	-0.000354772	0.00020028	0.848369
NHLH1	0	0	1.06645e-144	0	0.0601868	0.596998	0.417063	0.0788876	0.0765863	0.000424475	0.0002397	0.848369
ARSE	0	0	8.001e-145	0	0.0596815	0.603676	0.417089	0.0772347	0.0765869	-0.000315783	0.000178322	0.848369
HYOU1	0	0	8.22245e-145	0	0.0593881	0.605669	0.421197	0.0725284	0.076595	0.000115941	6.54737e-05	0.848369
CCDC73	0	0	9.24388e-145	0	0.0592459	0.605622	0.420354	0.0791654	0.0766079	-8.52302e-05	4.81328e-05	0.848369
DCUN1D1	0	0	1.10836e-144	0	0.058495	0.598767	0.420513	0.0765454	0.0766367	-0.000587778	0.000331973	0.848369
STEAP3	0	0	1.03187e-144	0	0.0603993	0.597667	0.418692	0.07615	0.076642	-8.50319e-05	4.80264e-05	0.848369
CXCL10	0	0	9.93584e-145	0	0.0590173	0.603647	0.420484	0.0761237	0.0766466	-0.000101006	5.70498e-05	0.848369
PRAMEF6	0	0	9.70774e-145	0	0.0585782	0.602424	0.420475	0.0757489	0.0766622	0.000141404	7.98709e-05	0.848369
DSC2	0	0	8.58881e-145	0	0.0592447	0.598809	0.420872	0.0745009	0.0766737	-0.000127179	7.18391e-05	0.848369
CRYBG2	0	0	1.05359e-144	0	0.0599105	0.601602	0.409778	0.0788225	0.0766943	6.66738e-05	3.76644e-05	0.848369
TAS2R19	0	0	1.1691e-144	0	0.0598568	0.600785	0.418555	0.0774023	0.0769088	-0.000368834	0.000208507	0.848369
ZNF771	0	0	9.21809e-145	0	0.0594295	0.601277	0.423543	0.0769548	0.0769125	-0.000145989	8.25308e-05	0.848369
TAPT1	0	0	1.03791e-144	0	0.0591784	0.597617	0.418014	0.07545	0.076983	-0.000165304	9.34724e-05	0.848369
TIGD6	0	0	9.26252e-145	0	0.0590891	0.600179	0.422495	0.0764896	0.0770216	0.000267233	0.000151129	0.848369
KISS1	0	0	1.12979e-144	0	0.0594647	0.601666	0.4158	0.0763769	0.077043	0.000419318	0.000237154	0.848369
SPR	0	0	1.21983e-144	0	0.0582755	0.599599	0.417087	0.0770417	0.0770519	0.000152383	8.61861e-05	0.848369
KRTAP16-1	0	0	1.17749e-144	0	0.0596537	0.597382	0.420878	0.0773423	0.0771876	0.00020807	0.000117736	0.848369
TMEM168	0	0	9.40919e-145	0	0.0590031	0.600938	0.423188	0.0773433	0.0772056	0.000163888	9.27413e-05	0.848369
ZNF385C	0	0	9.52338e-145	0	0.0591619	0.609452	0.417428	0.0771195	0.0772092	-0.000123838	7.00788e-05	0.848369
RBBP7	0	0	1.10492e-144	0	0.0603697	0.601715	0.4159	0.0752067	0.0772275	-0.000739378	0.000418433	0.848369
TRAIP	0	0	9.05275e-145	0	0.060363	0.60661	0.418322	0.0761818	0.0772701	0.000156085	8.83449e-05	0.848369
PNMA8B	0	0	1.15466e-144	0	0.0597393	0.596158	0.422254	0.0764933	0.0773947	-0.000172093	9.74469e-05	0.848369
RNF44	0	0	9.20234e-145	0	0.0599361	0.605827	0.416976	0.0748485	0.0773977	0.000143304	8.1146e-05	0.848369
TMEM82	0	0	1.01149e-144	0	0.0595876	0.60301	0.423447	0.0745634	0.0774195	9.17793e-05	5.19739e-05	0.848369
ATP6V1C1	0	0	1.04733e-144	0	0.0587388	0.601112	0.422228	0.0757708	0.0774262	-0.000246927	0.000139836	0.848369
TUBG2	0	0	9.55349e-145	0	0.058971	0.605463	0.417037	0.0785636	0.0774467	0.000206123	0.000116736	0.848369
CORO1B	0	0	1.06593e-144	0	0.0585107	0.606873	0.423336	0.0768688	0.0774601	0.000116653	6.60689e-05	0.848369
DZIP3	0	0	7.95733e-145	0	0.0598522	0.610017	0.418898	0.0749652	0.0775467	0.000123059	6.97172e-05	0.848369
SPATA17	0	0	1.20721e-144	0	0.0603311	0.598093	0.414657	0.0799012	0.0775643	9.05999e-05	5.13311e-05	0.848369
GRID1	0	0	9.94817e-145	0	0.0595764	0.600044	0.425742	0.0762912	0.0776304	0.000114637	6.49643e-05	0.848369
ARF6	0	0	1.02766e-144	0	0.0599183	0.605264	0.420642	0.0760504	0.0777171	0.000957214	0.000542607	0.848369
TRMT13	0	0	1.1474e-144	0	0.0590087	0.600038	0.417691	0.0756082	0.0777865	-0.000173332	9.8278e-05	0.848369
SIK2	0	0	1.08961e-144	0	0.0595951	0.60616	0.418831	0.0717918	0.0778071	0.000135304	7.67216e-05	0.848369
SERP2	0	0	8.7515e-145	0	0.0592163	0.5969	0.421641	0.07462	0.0778481	0.000924111	0.000524073	0.848369
MCUR1	0	0	1.18201e-144	0	0.0592189	0.601707	0.419805	0.0766514	0.0779165	0.000287095	0.000162852	0.848369
TOM1	0	0	1.13108e-144	0	0.0599066	0.604545	0.421473	0.0771327	0.0779238	-9.00901e-05	5.1104e-05	0.848369
EPN2	0	0	1.39921e-144	0	0.0587999	0.603378	0.418773	0.0784025	0.0779361	-0.000143563	8.14405e-05	0.848369
ADAM8	0	0	8.57503e-145	0	0.059284	0.602182	0.416841	0.0753255	0.0779373	-9.94017e-05	5.63887e-05	0.848369
PNLIPRP2	0	0	1.03429e-144	0	0.0596228	0.604296	0.4149	0.0783933	0.0779406	0.000128498	7.28951e-05	0.848369
ZNF285	0	0	9.52775e-145	0	0.0608605	0.602978	0.423052	0.078402	0.0779926	0.000167228	9.48831e-05	0.848369
NR5A2	0	0	1.05941e-144	0	0.0596338	0.605458	0.415832	0.0764689	0.078004	0.000256731	0.000145672	0.848369
SLC35G3	0	0	1.13707e-144	0	0.0590863	0.604446	0.424971	0.0780873	0.0780408	-0.000187529	0.000106418	0.848369
ANKRD9	0	0	1.1878e-144	0	0.0598199	0.604091	0.423293	0.0766735	0.0780901	0.000254017	0.000144173	0.848369
CCDC173	0	0	1.25029e-144	0	0.0588557	0.601558	0.419837	0.0755923	0.0781995	-0.000111428	6.32666e-05	0.848369
CDH19	0	0	9.72239e-145	0	0.0594587	0.606463	0.416442	0.0752206	0.0782329	0.000109791	6.23442e-05	0.848369
FUNDC1	0	0	9.76243e-145	0	0.0588709	0.596579	0.417784	0.0785551	0.0782991	-0.000620727	0.000352555	0.848369
WDR81	0	0	8.13064e-145	0	0.059848	0.607654	0.414969	0.0773309	0.0783726	6.00811e-05	3.41327e-05	0.848369
GPR39	0	0	1.14626e-144	0	0.0583571	0.60155	0.421757	0.0752619	0.0783813	-0.000137153	7.79205e-05	0.848369
CT47A7	0	0	9.0132e-145	0	0.0597091	0.603341	0.420534	0.0758285	0.0783963	-0.00199078	0.00113107	0.848369
POLR3H	0	0	7.60576e-145	0	0.0598111	0.597801	0.420807	0.0764742	0.0784519	-0.000193925	0.0001102	0.848369
TCEAL7	0	0	9.66627e-145	0	0.0600746	0.601586	0.420631	0.0753927	0.0784536	-0.00182233	0.00103556	0.848369
ADPRHL1	0	0	1.18566e-144	0	0.0595378	0.605319	0.423743	0.076121	0.0784544	-8.71606e-05	4.95304e-05	0.848369
NUP37	0	0	1.04168e-144	0	0.0589105	0.605425	0.41703	0.0771713	0.0785197	0.000261205	0.000148467	0.84858
AK9	0	0	7.93394e-145	0	0.0598871	0.597867	0.419597	0.0760948	0.0787715	-6.83046e-05	3.88564e-05	0.850805
UNC13C	0	0	1.09558e-144	0	0.0596352	0.604116	0.417631	0.0777311	0.0789284	5.31425e-05	3.0247e-05	0.852004
MRGPRX4	0	0	1.06132e-144	0	0.0587249	0.606024	0.418177	0.0762939	0.0791669	-9.33852e-05	5.31941e-05	0.852829
EXOSC3	0	0	7.62371e-145	0	0.058285	0.604695	0.417743	0.0771491	0.0791885	0.000127357	7.25502e-05	0.852829
PHOSPHO1	0	0	1.05274e-144	0	0.0595806	0.600248	0.42221	0.0784499	0.0791892	-0.000186898	0.000106469	0.852829
HAS3	0	0	1.1336e-144	0	0.0589268	0.60025	0.424406	0.0746704	0.0792242	0.000157011	8.94539e-05	0.852829
CASC4	0	0	9.3912e-145	0	0.0589421	0.599663	0.419421	0.0785756	0.0792513	0.000110234	6.28093e-05	0.852829
KCNJ3	0	0	1.00723e-144	0	0.0599061	0.598073	0.41526	0.0742336	0.079346	-0.000505224	0.000287958	0.852829
SLC7A11	0	0	9.61722e-145	0	0.059124	0.605106	0.421062	0.0817405	0.0795397	9.19166e-05	5.24226e-05	0.852829
COL28A1	0	0	9.98192e-145	0	0.0594542	0.607616	0.421648	0.074669	0.0796322	-5.49601e-05	3.13549e-05	0.852829
LIN7A	0	0	9.19619e-145	0	0.0604401	0.606202	0.417325	0.0775167	0.079713	0.000332647	0.000189827	0.852829
PGAP2	0	0	9.8929e-145	0	0.0592058	0.602378	0.42036	0.0801712	0.0797248	0.000168233	9.60072e-05	0.852829
PDC	0	0	8.62463e-145	0	0.0587395	0.597869	0.416047	0.0797303	0.0797272	0.000210012	0.00011985	0.852829
RNF217	0	0	1.03907e-144	0	0.0587418	0.600138	0.419618	0.0785883	0.0798604	-0.000145007	8.27898e-05	0.852829
TF	0	0	1.10721e-144	0	0.0589892	0.596771	0.416954	0.0748157	0.0799539	-8.33591e-05	4.76075e-05	0.852829
CD52	0	0	1.08127e-144	0	0.0596791	0.599153	0.417476	0.0756344	0.0800079	-0.00105322	0.000601613	0.852829
IL1RL2	0	0	1.03046e-144	0	0.0584764	0.601203	0.424126	0.075628	0.0800388	-0.000166072	9.48724e-05	0.852829
HFE	0	0	1.12308e-144	0	0.0607733	0.600295	0.419637	0.0767541	0.080073	-0.000151905	8.67889e-05	0.852829
TIGAR	0	0	1.1811e-144	0	0.0596547	0.602046	0.421552	0.0751838	0.0801517	-0.000502376	0.000287102	0.852829
FAIM2	0	0	1.21299e-144	0	0.0602375	0.60146	0.421171	0.0773957	0.0801668	0.000243605	0.000139224	0.852829
ZNF506	0	0	9.94212e-145	0	0.059635	0.599268	0.418714	0.0781781	0.0802176	0.000299468	0.000171179	0.852829
MPST	0	0	9.3338e-145	0	0.0589458	0.603974	0.423479	0.0751945	0.0802444	8.9721e-05	5.12902e-05	0.852829
SLCO1B7	0	0	9.02648e-145	0	0.0592401	0.605897	0.421293	0.0765528	0.0802727	9.2734e-05	5.30175e-05	0.852829
SNRPD1	0	0	1.05302e-144	0	0.0588714	0.605817	0.420309	0.0757199	0.0802941	-0.000999217	0.000571309	0.852829
GABRA3	0	0	1.27033e-144	0	0.0586214	0.600526	0.418221	0.0756641	0.0804233	-0.000500145	0.000286084	0.852829
CHMP4A	0	0	1.2282e-144	0	0.0599156	0.606893	0.416055	0.0742787	0.0804324	-6.47543e-05	3.70406e-05	0.852829
FBXW5	0	0	1.02803e-144	0	0.0591121	0.602229	0.418547	0.0758206	0.0804736	-6.1607e-05	3.52452e-05	0.852829
HAPLN2	0	0	1.11855e-144	0	0.0587466	0.603008	0.417934	0.0773423	0.0804868	0.000189691	0.000108526	0.852829
ME3	0	0	9.63815e-145	0	0.0598175	0.605348	0.41931	0.0765213	0.0805598	-0.00013884	7.94522e-05	0.852829
SPPL2B	0	0	1.09995e-144	0	0.059436	0.599363	0.409903	0.078575	0.0806166	0.000335501	0.000192029	0.852829
ATP10D	0	0	9.94139e-145	0	0.0602827	0.602193	0.417728	0.0751726	0.0806603	9.78417e-05	5.60094e-05	0.852829
PRKCG	0	0	1.21951e-144	0	0.0597122	0.60596	0.419872	0.0753169	0.0806876	-0.000212394	0.000121596	0.852829
MRPL49	0	0	9.62077e-145	0	0.0589839	0.601858	0.425905	0.0757515	0.0807744	-0.000274509	0.000157202	0.852829
KCNK13	0	0	1.03638e-144	0	0.0591673	0.602098	0.421558	0.0765334	0.0807774	-0.000126382	7.23751e-05	0.852829
OSTN	0	0	1.09552e-144	0	0.0590228	0.601304	0.417595	0.0768057	0.0808127	0.000386102	0.000221135	0.852829
RNF169	0	0	7.79066e-145	0	0.0584051	0.600803	0.419035	0.073946	0.0808344	-6.8095e-05	3.90033e-05	0.852829
PSME3	0	0	9.09065e-145	0	0.0591047	0.600435	0.41752	0.077773	0.0808627	-0.00046714	0.000267592	0.852829
CSTA	0	0	1.0872e-144	0	0.0594339	0.605892	0.419347	0.0753461	0.0809034	-0.000242035	0.000138664	0.852829
FBXL6	0	0	1.17035e-144	0	0.059317	0.607845	0.41863	0.0748087	0.0809839	-8.7133e-05	4.99324e-05	0.852829
RAB19	0	0	1.03793e-144	0	0.0579083	0.60259	0.419105	0.076773	0.080988	-0.00020998	0.000120332	0.852829
NLRC5	0	0	1.22347e-144	0	0.0589498	0.601981	0.422583	0.0737168	0.0810905	-0.000138954	7.96567e-05	0.852829
PDPR	0	0	1.16849e-144	0	0.0579707	0.601893	0.418597	0.0748151	0.0811327	-4.01091e-05	2.29962e-05	0.852829
CCZ1B	0	0	8.08556e-145	0	0.0598203	0.599184	0.419248	0.0736777	0.0811329	-0.000271483	0.000155653	0.852829
GRIN2A	0	0	1.08078e-144	0	0.0590668	0.604821	0.41852	0.0740849	0.0811402	-0.000121995	6.99465e-05	0.852829
MAPRE1	0	0	8.71937e-145	0	0.0590929	0.602681	0.421026	0.0756122	0.0811436	-0.000454206	0.000260424	0.852829
B3GALNT2	0	0	1.04339e-144	0	0.0597456	0.598539	0.416601	0.0771578	0.0811828	0.00011819	6.77744e-05	0.852829
PAX7	0	0	8.67395e-145	0	0.0582551	0.601806	0.41973	0.0767195	0.0812351	9.62023e-05	5.51752e-05	0.852829
NAIF1	0	0	9.61378e-145	0	0.0590499	0.600347	0.420587	0.0731179	0.0812891	0.000128494	7.37088e-05	0.852829
TMEM261	0	0	1.03984e-144	0	0.0585652	0.597791	0.421368	0.078192	0.0813839	-0.000395814	0.000227124	0.852829
ARHGAP25	0	0	1.04124e-144	0	0.059205	0.60528	0.420703	0.0732355	0.081396	0.000106926	6.13579e-05	0.852829
KRTAP3-3	0	0	8.33243e-145	0	0.0596096	0.601062	0.420835	0.0739071	0.0814394	0.00033724	0.000193548	0.852829
KIAA1958	0	0	1.03811e-144	0	0.0594731	0.591287	0.420605	0.0773069	0.0814849	-0.000245048	0.000140659	0.852829
RNF34	0	0	1.0817e-144	0	0.0605428	0.605764	0.423264	0.0722693	0.0814865	0.000113242	6.50017e-05	0.852829
KIAA1549L	0	0	1.15585e-144	0	0.0593768	0.599366	0.415872	0.0751586	0.0815244	7.52708e-05	4.32114e-05	0.852829
CRCT1	0	0	1.46951e-144	0	0.0589788	0.600718	0.423275	0.0758258	0.0815307	-0.000699933	0.000401825	0.852829
FGFR1OP2	0	0	1.05772e-144	0	0.0591912	0.598708	0.417223	0.0795471	0.081601	-0.000212149	0.000121821	0.852829
GMEB2	0	0	1.19234e-144	0	0.0592619	0.593971	0.423062	0.0767125	0.0817911	-0.000162619	9.34376e-05	0.852829
IGF2BP1	0	0	1.16201e-144	0	0.0598956	0.602308	0.424429	0.0727073	0.0818315	0.000238445	0.000137024	0.852829
RIPOR3	0	0	7.8553e-145	0	0.0593176	0.597761	0.423151	0.0766125	0.0819139	-5.08632e-05	2.92368e-05	0.852829
GPR19	0	0	1.07931e-144	0	0.0585705	0.602344	0.422288	0.0760158	0.0820221	0.000243608	0.000140078	0.852829
NUDT13	0	0	9.63752e-145	0	0.0599257	0.605054	0.4162	0.0770752	0.0821089	0.000102826	5.91434e-05	0.852829
FAM117B	0	0	9.76182e-145	0	0.0595049	0.596696	0.42043	0.0779234	0.0821325	0.00014603	8.39995e-05	0.852829
GPR157	0	0	1.26591e-144	0	0.0599106	0.600875	0.417517	0.0780058	0.082155	0.000147575	8.48946e-05	0.852829
CST9	0	0	1.05569e-144	0	0.0581923	0.607903	0.424922	0.0772312	0.0821619	-0.000268453	0.000154435	0.852829
SOD3	0	0	9.04836e-145	0	0.0587406	0.607491	0.415942	0.0777622	0.0822	0.000181339	0.000104333	0.852829
TRIM3	0	0	1.13507e-144	0	0.0602173	0.606433	0.418843	0.0762321	0.0822971	-0.000201323	0.000115868	0.852829
ENO3	0	0	9.18679e-145	0	0.0591424	0.604102	0.422488	0.076819	0.0823678	0.000121525	6.99576e-05	0.852829
DAZAP2	0	0	8.81772e-145	0	0.0591761	0.604963	0.416985	0.0799239	0.0824606	0.00028622	0.000164816	0.852829
LRFN5	0	0	9.67324e-145	0	0.0595154	0.603899	0.421769	0.0749839	0.0824711	-0.000195105	0.000112353	0.852829
MPZ	0	0	9.86537e-145	0	0.0589938	0.598355	0.426132	0.0769516	0.0824929	0.000314198	0.000180947	0.852829
ZSCAN1	0	0	8.07283e-145	0	0.0595472	0.605344	0.423716	0.0792401	0.082515	-0.000122729	7.06848e-05	0.852829
IRX4	0	0	9.75746e-145	0	0.0591264	0.602829	0.420572	0.0766482	0.0825374	0.000110714	6.37694e-05	0.852829
TERF1	0	0	1.22866e-144	0	0.0603906	0.597119	0.422814	0.0736056	0.0825761	-0.000147605	8.5029e-05	0.852829
TNFAIP8L2	0	0	1.04385e-144	0	0.0592759	0.609904	0.414794	0.0755791	0.0826093	-0.000239081	0.000137739	0.852829
SIX4	0	0	1.17982e-144	0	0.059657	0.599069	0.418517	0.076212	0.0826153	0.000177563	0.000102299	0.852829
C11orf57	0	0	8.56238e-145	0	0.0577912	0.602963	0.424966	0.0757457	0.082623	-9.14789e-05	5.2705e-05	0.852829
ZFAND6	0	0	8.36416e-145	0	0.0599053	0.600423	0.42686	0.0733043	0.0829016	-0.000244285	0.000140871	0.852829
TSPYL5	0	0	9.79738e-145	0	0.059059	0.597693	0.415282	0.0756654	0.0829036	0.000137983	7.95708e-05	0.852829
MYCBP2	0	0	9.6862e-145	0	0.0596939	0.60059	0.420793	0.075325	0.0829341	-6.78898e-05	3.91539e-05	0.852829
PLPP4	0	0	9.72907e-145	0	0.058579	0.607256	0.420815	0.0754907	0.0830508	-0.000157179	9.06835e-05	0.852829
SLC12A3	0	0	1.08738e-144	0	0.0605598	0.606485	0.418246	0.0736523	0.0830598	-7.10728e-05	4.10064e-05	0.852829
SCRN1	0	0	1.06357e-144	0	0.0586147	0.596099	0.420878	0.0789907	0.0830848	-0.00018498	0.000106735	0.852829
NAAA	0	0	9.88815e-145	0	0.0595747	0.594648	0.418783	0.0779667	0.0831049	-0.000128611	7.42145e-05	0.852829
MED10	0	0	1.05457e-144	0	0.0598978	0.601755	0.416603	0.0758654	0.0831079	0.00037964	0.000219072	0.852829
NOL6	0	0	8.48019e-145	0	0.059942	0.610678	0.423524	0.0747105	0.0831293	5.28537e-05	3.05015e-05	0.852829
CFAP206	0	0	8.61896e-145	0	0.0597828	0.610667	0.419551	0.0778695	0.0831446	7.53592e-05	4.34914e-05	0.852829
KLRG1	0	0	9.79465e-145	0	0.059166	0.603551	0.418578	0.0781687	0.0831513	0.000370354	0.000213744	0.852829
CYP3A7-CYP3A51P	0	0	1.29924e-144	0	0.0601311	0.600227	0.414871	0.0776334	0.0831524	-0.00428301	0.00247188	0.852829
PYGO1	0	0	1.05535e-144	0	0.0609554	0.600115	0.420134	0.0801897	0.0831604	-0.000165353	9.54337e-05	0.852829
TAX1BP3	0	0	9.42267e-145	0	0.0590901	0.602277	0.42056	0.0747246	0.0832416	-0.00013486	7.78549e-05	0.852829
KLRB1	0	0	1.13213e-144	0	0.0606821	0.597677	0.419032	0.0778335	0.0832813	0.000381965	0.000220538	0.852829
FTH1	0	0	1.03847e-144	0	0.0586374	0.604576	0.423554	0.0775099	0.0833368	-0.000301173	0.000173922	0.852829
KRTAP1-5	0	0	8.17884e-145	0	0.059171	0.601091	0.418835	0.0782137	0.0833485	-0.000122668	7.08412e-05	0.852829
NMBR	0	0	1.26585e-144	0	0.0593166	0.600998	0.416222	0.0777921	0.0833511	-6.18891e-05	3.57414e-05	0.852829
CCDC141	0	0	1.04787e-144	0	0.059739	0.601654	0.421977	0.0718074	0.0833797	-5.39488e-05	3.11587e-05	0.852829
HUNK	0	0	9.9587e-145	0	0.0605255	0.595129	0.421859	0.0766803	0.0836264	0.000111336	6.43546e-05	0.852829
OR10W1	0	0	8.14527e-145	0	0.059287	0.599961	0.421017	0.0750558	0.0836305	-0.000208536	0.00012054	0.852829
ZFHX2	0	0	8.67753e-145	0	0.0593671	0.605302	0.417894	0.075301	0.0836744	7.30813e-05	4.22492e-05	0.852829
TREML1	0	0	9.36529e-145	0	0.0592763	0.596344	0.419167	0.0785098	0.0837104	0.000281289	0.000162636	0.852829
SLK	0	0	9.32483e-145	0	0.0599815	0.597498	0.421017	0.0770892	0.083755	-8.86203e-05	5.12459e-05	0.852829
ATP6V1D	0	0	1.2257e-144	0	0.0588357	0.6028	0.419511	0.0758278	0.0837721	-0.000118806	6.87051e-05	0.852829
NPIPA1	0	0	8.98769e-145	0	0.0597724	0.599631	0.416795	0.0778324	0.0837856	-0.000471783	0.000272842	0.852829
NRBF2	0	0	1.25729e-144	0	0.0594387	0.608961	0.421159	0.0777216	0.0837995	-0.000136231	7.87888e-05	0.852829
DUSP11	0	0	1.10354e-144	0	0.058005	0.604936	0.417207	0.0774294	0.0838431	-0.000308468	0.000178427	0.852829
NOL3	0	0	1.0015e-144	0	0.0595713	0.599723	0.417701	0.0760881	0.083994	0.000165537	9.57977e-05	0.852829
KRTAP5-2	0	0	8.53645e-145	0	0.0597214	0.601179	0.418565	0.0748594	0.0839983	0.000544453	0.000315085	0.852829
HIC1	0	0	9.17234e-145	0	0.0593111	0.600166	0.422612	0.0793872	0.0840144	-0.000146445	8.47549e-05	0.852829
PPM1K	0	0	1.00918e-144	0	0.0601447	0.60003	0.416367	0.0742289	0.0840348	-0.000250957	0.000145251	0.852829
AIRE	0	0	8.24449e-145	0	0.0586962	0.601365	0.422033	0.073724	0.0840549	0.000113344	6.56061e-05	0.852829
MORN1	0	0	1.05356e-144	0	0.0584208	0.604699	0.419699	0.074131	0.0841569	-9.94581e-05	5.75877e-05	0.852829
KRTAP9-6	0	0	8.3897e-145	0	0.0589024	0.604314	0.424724	0.0755675	0.0841588	-0.000503491	0.00029153	0.852829
DIABLO	0	0	1.05207e-144	0	0.0578627	0.602622	0.422915	0.0776736	0.0841698	-0.000180027	0.000104243	0.852829
ASB7	0	0	1.08746e-144	0	0.0599155	0.601456	0.422172	0.0780449	0.0842426	-0.000451398	0.000261438	0.852829
PIR	0	0	1.07128e-144	0	0.0589305	0.59417	0.422274	0.0766946	0.0842718	0.000206635	0.000119689	0.852829
IRF5	0	0	9.54403e-145	0	0.0594203	0.603477	0.415777	0.0757512	0.0843311	-0.000233871	0.00013549	0.852829
CYP26C1	0	0	1.15944e-144	0	0.0601184	0.602527	0.416092	0.0755562	0.0843533	-0.000102447	5.93559e-05	0.852829
RADIL	0	0	1.01992e-144	0	0.0589006	0.604172	0.418312	0.0764475	0.0843576	-7.11353e-05	4.1215e-05	0.852829
PLAC1	0	0	1.0639e-144	0	0.0580737	0.600176	0.421272	0.0772548	0.0843638	0.00130123	0.000753935	0.852829
PRR35	0	0	9.81268e-145	0	0.0593976	0.60332	0.416728	0.0757483	0.0843821	0.00010806	6.26137e-05	0.852829
PCIF1	0	0	1.08844e-144	0	0.0596325	0.597933	0.425893	0.07491	0.0844563	-0.000144507	8.37524e-05	0.853115
POLD2	0	0	9.69528e-145	0	0.0588632	0.596871	0.421307	0.0777135	0.0845513	0.00019283	0.000111793	0.853518
RAB13	0	0	1.04317e-144	0	0.0592184	0.60213	0.412212	0.0818629	0.0845882	-0.000194719	0.000112902	0.853518
ANO4	0	0	8.00645e-145	0	0.0586853	0.606003	0.416362	0.0761748	0.084853	0.000110524	6.41384e-05	0.855459
RSRC1	0	0	1.00881e-144	0	0.0589735	0.600659	0.419889	0.0777663	0.0848917	-0.000116207	6.74447e-05	0.855459
LDLRAD1	0	0	8.64063e-145	0	0.0581881	0.600727	0.421016	0.077227	0.0849844	-0.000292208	0.000169643	0.855459
PUDP	0	0	1.11583e-144	0	0.0591746	0.599604	0.417828	0.0760185	0.0850775	0.000457651	0.000265772	0.855459
GSTM3	0	0	1.05071e-144	0	0.0595215	0.602424	0.42693	0.0746062	0.0850882	-0.000191191	0.000111034	0.855459
UXS1	0	0	1.04238e-144	0	0.0589292	0.606733	0.415326	0.074519	0.085095	-0.000235405	0.000136714	0.855459
CRYL1	0	0	1.15878e-144	0	0.0594365	0.600745	0.420553	0.0758224	0.0851428	0.000168198	9.76981e-05	0.855459
KHDC3L	0	0	1.23063e-144	0	0.0596543	0.604901	0.418849	0.0764778	0.0851691	0.000427116	0.000248112	0.855459
GLMN	0	0	1.19213e-144	0	0.0595258	0.601538	0.422168	0.0754707	0.0852396	-0.000132004	7.66986e-05	0.855459
MYNN	0	0	1.04446e-144	0	0.0594479	0.602641	0.421064	0.077695	0.0852416	0.000244616	0.000142131	0.855459
PSME2	0	0	9.77147e-145	0	0.0590446	0.596191	0.417091	0.0767331	0.0854636	0.000274166	0.000159413	0.857189
ACAT1	0	0	1.01382e-144	0	0.0612532	0.597119	0.418604	0.0761929	0.0855064	0.000157359	9.15087e-05	0.857189
GPATCH2L	0	0	1.03327e-144	0	0.0602313	0.596458	0.418856	0.0762146	0.0855958	0.000184409	0.00010727	0.857472
SHCBP1	0	0	8.80661e-145	0	0.0595423	0.600741	0.420908	0.0814272	0.0856828	-0.000128778	7.49303e-05	0.857472
AGPAT3	0	0	9.45166e-145	0	0.0594058	0.601889	0.418179	0.0773011	0.0857085	-0.000267104	0.000155429	0.857472
REEP1	0	0	9.87086e-145	0	0.0597565	0.602705	0.422111	0.0784192	0.0857756	0.000314776	0.000183209	0.857472
KCNIP4	0	0	8.82407e-145	0	0.0599621	0.605873	0.419185	0.0759863	0.0857817	-0.000324256	0.00018873	0.857472
BEST1	0	0	8.71704e-145	0	0.059334	0.600535	0.423834	0.0747494	0.0858119	-0.000144182	8.39278e-05	0.857472
OR13C3	0	0	9.71368e-145	0	0.0600591	0.602028	0.418137	0.078256	0.085987	0.00021036	0.000122518	0.85876
ZNF570	0	0	1.08252e-144	0	0.0612216	0.605896	0.419005	0.0741876	0.0861717	0.00023088	0.000134549	0.858773
SOAT1	0	0	7.95484e-145	0	0.0602585	0.596863	0.421064	0.0772843	0.0861956	0.000175155	0.000102082	0.858773
AMDHD2	0	0	1.06756e-144	0	0.0585542	0.599734	0.416284	0.0807845	0.0862432	-0.000112091	6.53376e-05	0.858773
LMO1	0	0	9.93984e-145	0	0.0586001	0.597557	0.417385	0.0767963	0.0863199	-0.000252326	0.000147116	0.858773
SORBS2	0	0	9.87096e-145	0	0.0596693	0.599247	0.41999	0.0743243	0.086388	-0.000113813	6.63716e-05	0.858773
LDHB	0	0	1.04525e-144	0	0.0598918	0.594267	0.419864	0.0752453	0.0864811	-0.0002332	0.000136034	0.858773
ZSCAN21	0	0	7.69718e-145	0	0.058694	0.605216	0.421455	0.0754071	0.0866127	-9.7819e-05	5.70854e-05	0.858773
IL17RE	0	0	9.45188e-145	0	0.0596558	0.600888	0.421278	0.0744299	0.0866488	-7.26574e-05	4.24064e-05	0.858773
ZNF669	0	0	1.05217e-144	0	0.0601226	0.600748	0.416111	0.0769037	0.0866561	-0.000236309	0.000137925	0.858773
ADSS	0	0	9.58402e-145	0	0.0589623	0.600166	0.422253	0.0747439	0.0866979	0.000220786	0.000128881	0.858773
AMER1	0	0	9.98104e-145	0	0.0598253	0.603542	0.420769	0.075697	0.0866989	-0.00019983	0.000116649	0.858773
TMEM223	0	0	9.64039e-145	0	0.0600742	0.600848	0.420117	0.0755376	0.0867088	-0.000265374	0.000154914	0.858773
MAGEC1	0	0	1.06465e-144	0	0.0585544	0.60417	0.417212	0.0773293	0.0868356	-0.000170445	9.95387e-05	0.858773
CD36	0	0	1.05025e-144	0	0.0606329	0.59534	0.419219	0.077961	0.0868473	0.000109532	6.39688e-05	0.858773
PPP1R9B	0	0	1.10966e-144	0	0.0596871	0.602551	0.420276	0.0741362	0.0868712	0.00020986	0.000122571	0.858773
RHBDL2	0	0	8.44819e-145	0	0.0591932	0.606747	0.416647	0.0793726	0.086905	0.00019879	0.000116118	0.858773
XAF1	0	0	1.02546e-144	0	0.0595151	0.603203	0.419596	0.0747657	0.0869345	0.000118945	6.9485e-05	0.858773
CACNA2D3	0	0	9.70214e-145	0	0.0591812	0.602574	0.420705	0.0789141	0.0869479	-9.61718e-05	5.61839e-05	0.858773
CALD1	0	0	1.14343e-144	0	0.0592486	0.600575	0.422308	0.0767742	0.0869762	-9.25112e-05	5.40502e-05	0.858773
ZNF705D	0	0	9.38544e-145	0	0.0594689	0.600679	0.420111	0.0730626	0.0870044	0.000194526	0.000113663	0.858773
2002-03-01	0	0	9.63658e-145	0	0.0597075	0.600498	0.422813	0.0759375	0.0870854	9.93109e-05	5.8043e-05	0.858773
CBWD1	0	0	9.35971e-145	0	0.0595284	0.601306	0.421712	0.0758157	0.0871384	-0.000129811	7.5882e-05	0.858773
TM9SF4	0	0	8.89429e-145	0	0.0592771	0.611141	0.425358	0.0739339	0.0871589	-0.000170892	9.99024e-05	0.858773
PRSS42	0	0	1.13348e-144	0	0.0595088	0.60422	0.42025	0.0747872	0.0872937	-0.000205089	0.000119945	0.858773
FCN2	0	0	1.01158e-144	0	0.0603077	0.601448	0.418251	0.0797544	0.0873002	-8.84349e-05	5.17216e-05	0.858773
INTS14	0	0	9.09945e-145	0	0.0606012	0.593305	0.420296	0.0721128	0.0873692	0.000149328	8.73542e-05	0.858773
LDLR	0	0	8.38603e-145	0	0.0594321	0.607359	0.419895	0.0776567	0.0874216	-0.000130994	7.66418e-05	0.858773
UTS2	0	0	9.33497e-145	0	0.059084	0.607915	0.421425	0.0763859	0.0874614	-0.000525602	0.000307557	0.858773
ASXL3	0	0	1.10165e-144	0	0.0594886	0.604797	0.421436	0.0770206	0.0875498	-7.71006e-05	4.51282e-05	0.858773
HTR6	0	0	9.34543e-145	0	0.0596407	0.600319	0.420459	0.0739893	0.0876316	-0.000135645	7.94156e-05	0.858773
ID3	0	0	9.21693e-145	0	0.0603973	0.597847	0.421249	0.077251	0.0876656	0.000167545	9.81025e-05	0.858773
LEAP2	0	0	9.6221e-145	0	0.0592379	0.605674	0.423993	0.0749292	0.0876758	-0.000761263	0.000445757	0.858773
PMEPA1	0	0	1.03107e-144	0	0.0587388	0.60426	0.416898	0.0756742	0.0877075	-0.000252779	0.000148029	0.858773
NFKB2	0	0	9.87431e-145	0	0.0600561	0.598005	0.420183	0.0755089	0.0877104	0.000160889	9.42184e-05	0.858773
UCMA	0	0	9.31724e-145	0	0.0590084	0.595664	0.417167	0.0765727	0.0877224	0.000159781	9.35735e-05	0.858773
FAM3D	0	0	9.44102e-145	0	0.0599583	0.607798	0.417357	0.074803	0.0877943	0.000115865	6.78698e-05	0.858773
TIMM8A	0	0	8.37331e-145	0	0.0592823	0.60362	0.419631	0.0772476	0.0877967	-0.00223751	0.00131067	0.858773
RUNDC1	0	0	9.14059e-145	0	0.0593546	0.605341	0.416088	0.0783138	0.0878452	-0.000100526	5.88945e-05	0.858773
SEMA5A	0	0	9.76584e-145	0	0.0594105	0.60606	0.418954	0.077086	0.0878901	-8.15301e-05	4.77721e-05	0.858773
UBXN2A	0	0	8.59884e-145	0	0.0608836	0.600868	0.416929	0.0752617	0.0879097	-0.000248116	0.000145391	0.858773
HIST1H2BL	0	0	1.00248e-144	0	0.0589172	0.601385	0.420238	0.0774461	0.087917	0.000480028	0.000281293	0.858773
CD1B	0	0	1.11109e-144	0	0.0586394	0.596045	0.411046	0.0786164	0.0879585	9.06118e-05	5.31049e-05	0.858773
NCCRP1	0	0	1.00389e-144	0	0.0592107	0.605987	0.421228	0.0741048	0.0880012	0.000161598	9.47206e-05	0.858773
TP53INP2	0	0	1.01627e-144	0	0.0602539	0.597633	0.418447	0.0779978	0.0880611	0.000248749	0.000145832	0.858773
ZNF154	0	0	1.12793e-144	0	0.0587328	0.599642	0.42258	0.077694	0.088071	0.000184896	0.000108401	0.858773
SYS1	0	0	9.6019e-145	0	0.0591218	0.604426	0.415511	0.0772257	0.0881913	0.000430539	0.000252512	0.859143
PEX11A	0	0	9.59061e-145	0	0.0596774	0.598045	0.421528	0.078064	0.0882015	-0.000223765	0.000131242	0.859143
TPCN1	0	0	9.29415e-145	0	0.0598472	0.60014	0.415584	0.0772686	0.0882734	0.000105967	6.21656e-05	0.859392
PIGW	0	0	7.76072e-145	0	0.0589893	0.605995	0.418691	0.0767373	0.0883303	0.000101305	5.94413e-05	0.859489
ABL2	0	0	1.03842e-144	0	0.0590382	0.599634	0.421076	0.0775029	0.0883816	-0.000115373	6.77069e-05	0.859489
ZYX	0	0	9.00843e-145	0	0.0603616	0.598201	0.423982	0.0774908	0.0884447	0.000143251	8.40839e-05	0.859489
GPR37L1	0	0	1.09569e-144	0	0.0605616	0.599161	0.421338	0.0785089	0.0884687	0.000176012	0.000103321	0.859489
FAM219A	0	0	1.12211e-144	0	0.060632	0.595519	0.418683	0.0753851	0.0886894	-0.000403545	0.00023705	0.859767
GJB4	0	0	1.09091e-144	0	0.0597034	0.606774	0.423089	0.0772982	0.0886923	-6.63128e-05	3.89537e-05	0.859767
PIWIL2	0	0	1.16678e-144	0	0.0590155	0.598798	0.417447	0.0801794	0.088915	6.16436e-05	3.62362e-05	0.859767
USP11	0	0	9.46093e-145	0	0.0594579	0.593243	0.419233	0.0758577	0.0889188	-0.000259689	0.000152656	0.859767
KIAA0513	0	0	1.42784e-144	0	0.0598192	0.601498	0.416791	0.0775287	0.0890121	0.000113607	6.68021e-05	0.859767
DLGAP4	0	0	1.05679e-144	0	0.0596751	0.605012	0.424168	0.0772224	0.0891146	0.00010422	6.13023e-05	0.859767
ZNF518B	0	0	1.20511e-144	0	0.0597253	0.605147	0.421864	0.0773507	0.0891683	0.000146999	8.64794e-05	0.859767
MANSC4	0	0	1.05557e-144	0	0.0583502	0.59743	0.421372	0.0760289	0.0891835	-0.000281884	0.00016584	0.859767
NBPF1	0	0	1.02165e-144	0	0.0597472	0.600683	0.422323	0.077424	0.0892668	-0.000199603	0.000117462	0.859767
SNAPC2	0	0	1.03951e-144	0	0.0592033	0.594953	0.421078	0.0760841	0.089386	0.00020665	0.000121655	0.859767
LRRC39	0	0	1.03201e-144	0	0.0606218	0.606121	0.419724	0.0769913	0.0894524	-0.000121322	7.14373e-05	0.859767
SEMA7A	0	0	1.28087e-144	0	0.0588362	0.599881	0.420312	0.0757431	0.0895135	-0.000122369	7.20673e-05	0.859767
UGGT2	0	0	1.18007e-144	0	0.0598832	0.600101	0.421215	0.0760797	0.0895215	-4.26682e-05	2.51294e-05	0.859767
C1orf100	0	0	9.78959e-145	0	0.0596228	0.609444	0.418698	0.0758079	0.089563	-9.81309e-05	5.78016e-05	0.859767
PSPC1	0	0	1.01291e-144	0	0.060296	0.599793	0.419037	0.0741998	0.0897526	-0.000322417	0.000190024	0.859767
CHST14	0	0	1.03845e-144	0	0.0595148	0.600901	0.419056	0.0782427	0.0897607	0.000231825	0.000136635	0.859767
TAF4	0	0	9.40328e-145	0	0.0586832	0.603803	0.422698	0.0747333	0.0897618	0.00013276	7.82474e-05	0.859767
ATP5B	0	0	1.03426e-144	0	0.0594661	0.600246	0.417157	0.0783169	0.0898015	0.00020513	0.000120917	0.859767
SPOCK2	0	0	9.20571e-145	0	0.0593529	0.601614	0.42238	0.0767825	0.089825	-7.25175e-05	4.27495e-05	0.859767
MCPH1	0	0	9.77642e-145	0	0.059333	0.60444	0.420303	0.073538	0.0898331	8.31618e-05	4.90256e-05	0.859767
BRPF3	0	0	9.85244e-145	0	0.0593188	0.606908	0.424284	0.0775492	0.089836	7.12063e-05	4.1978e-05	0.859767
B4GALNT1	0	0	9.05099e-145	0	0.0591453	0.604424	0.417713	0.0759896	0.0899399	-0.000126496	7.45968e-05	0.859767
POU6F1	0	0	1.1469e-144	0	0.0594793	0.602418	0.423363	0.077065	0.0899432	-0.00030322	0.000178816	0.859767
NUP35	0	0	1.17535e-144	0	0.0594355	0.599197	0.421473	0.07587	0.0899696	-0.000188689	0.000111284	0.859767
NME1	0	0	9.08914e-145	0	0.0580221	0.603756	0.424392	0.0779583	0.0900951	0.000422347	0.000249186	0.859767
APTX	0	0	1.29488e-144	0	0.0594668	0.599685	0.415079	0.0750467	0.090138	9.61369e-05	5.67285e-05	0.859767
RWDD2A	0	0	1.17514e-144	0	0.0613047	0.603755	0.417751	0.0772058	0.0901689	0.000271962	0.000160495	0.859767
CDKL1	0	0	1.01051e-144	0	0.060071	0.602064	0.417971	0.074762	0.090173	0.000169191	9.98472e-05	0.859767
RAD17	0	0	9.00103e-145	0	0.0586291	0.600152	0.419077	0.0766313	0.0901743	-0.00014127	8.33699e-05	0.859767
GLRA2	0	0	1.05319e-144	0	0.0597823	0.604959	0.418528	0.0769811	0.0901787	0.000447439	0.000264059	0.859767
MED30	0	0	1.0525e-144	0	0.0605655	0.598483	0.417672	0.074957	0.0901797	-0.000199174	0.000117544	0.859767
HEATR5B	0	0	1.05741e-144	0	0.0596222	0.605262	0.423299	0.0745532	0.090185	-9.85089e-05	5.81367e-05	0.859767
MT1X	0	0	1.04162e-144	0	0.0591616	0.602022	0.422585	0.0767625	0.0902214	0.000349929	0.00020654	0.859767
RETREG3	0	0	1.04282e-144	0	0.0602531	0.602615	0.416196	0.0783629	0.0902215	-0.000204836	0.000120901	0.859767
FTMT	0	0	1.02996e-144	0	0.0600442	0.599629	0.418958	0.0763733	0.0903965	0.000190132	0.000112284	0.859767
CDR2L	0	0	1.06291e-144	0	0.0597701	0.605364	0.419727	0.0732428	0.0905642	-0.000116686	6.89456e-05	0.859767
CPSF7	0	0	1.05893e-144	0	0.0590545	0.603394	0.421008	0.077231	0.0905688	0.000283851	0.000167719	0.859767
ASB15	0	0	9.42771e-145	0	0.0598097	0.600883	0.418492	0.0752852	0.0905752	6.10502e-05	3.60735e-05	0.859767
KIRREL3	0	0	9.60921e-145	0	0.060155	0.60068	0.416914	0.076785	0.0906323	-0.000110778	6.54686e-05	0.859767
KCTD3	0	0	1.02559e-144	0	0.0601379	0.595722	0.418111	0.0745153	0.0906853	-0.000148819	8.79648e-05	0.859767
TRIL	0	0	1.12706e-144	0	0.0607955	0.598729	0.425929	0.0748821	0.0906899	-0.00030837	0.000182275	0.859767
ATP5I	0	0	1.12797e-144	0	0.059552	0.599773	0.415131	0.074881	0.0906912	-0.000291462	0.000172282	0.859767
ZBTB40	0	0	9.91075e-145	0	0.0605311	0.60263	0.417984	0.075121	0.0907012	-0.000119714	7.07648e-05	0.859767
T	0	0	1.01784e-144	0	0.0592272	0.603243	0.422034	0.076575	0.0907277	-0.000148199	8.76095e-05	0.859767
ADD3	0	0	9.97458e-145	0	0.0592393	0.60281	0.423482	0.0748564	0.0907673	9.73867e-05	5.75784e-05	0.859767
NEUROD4	0	0	9.68986e-145	0	0.0596511	0.599606	0.415998	0.0775343	0.0907753	-9.73359e-05	5.75498e-05	0.859767
MAP2K5	0	0	9.91516e-145	0	0.0594957	0.599806	0.420212	0.0749842	0.0907756	-0.000261832	0.000154808	0.859767
TNFAIP2	0	0	1.03977e-144	0	0.0605245	0.59577	0.424062	0.0754715	0.0907806	-0.000160046	9.46284e-05	0.859767
MYBPC3	0	0	1.10027e-144	0	0.0599692	0.599503	0.421097	0.0769429	0.0908384	-5.53773e-05	3.27482e-05	0.859767
PDE4C	0	0	9.29861e-145	0	0.0587144	0.602764	0.421451	0.0773812	0.0908884	0.000108779	6.4338e-05	0.859767
TMED8	0	0	8.64773e-145	0	0.0602497	0.604466	0.420946	0.0740755	0.0909372	-0.000141096	8.34647e-05	0.859767
DDX31	0	0	1.04789e-144	0	0.0588333	0.601343	0.419892	0.077345	0.0909645	-7.19975e-05	4.25934e-05	0.859767
LGALS1	0	0	1.16862e-144	0	0.0593276	0.605457	0.419787	0.0750779	0.0909703	-0.000107093	6.33569e-05	0.859767
NSUN4	0	0	9.61221e-145	0	0.0595742	0.603736	0.416749	0.0777263	0.0909993	-0.000138819	8.21335e-05	0.859767
ANKRD2	0	0	9.27812e-145	0	0.0591453	0.602196	0.41705	0.0715598	0.0910566	7.40529e-05	4.38219e-05	0.859871
GNA12	0	0	1.08894e-144	0	0.0599896	0.602761	0.416373	0.0765091	0.091114	-0.000325871	0.000192873	0.859976
SMIM29	0	0	9.30775e-145	0	0.0589947	0.602164	0.418777	0.0763377	0.0911875	0.000152729	9.04159e-05	0.860231
BCL11B	0	0	1.06177e-144	0	0.0591891	0.602391	0.422254	0.0763373	0.0913664	0.000181951	0.000107775	0.861081
RERGL	0	0	9.05839e-145	0	0.0591075	0.608142	0.421605	0.0734247	0.0914085	-8.88004e-05	5.2606e-05	0.861081
RTEL1	0	0	9.98116e-145	0	0.0596441	0.603701	0.420596	0.0757884	0.0914168	-0.000112333	6.65488e-05	0.861081
DUOXA1	0	0	1.08208e-144	0	0.0590961	0.605727	0.417749	0.0754402	0.0915478	-0.000129645	7.6836e-05	0.861533
EMC3	0	0	1.10606e-144	0	0.0590343	0.59557	0.419169	0.075653	0.0915576	-0.000384255	0.00022774	0.861533
ZNF284	0	0	1.06191e-144	0	0.0593401	0.604765	0.422262	0.0775519	0.0916427	0.000175879	0.000104268	0.861727
COX7A2	0	0	9.75131e-145	0	0.0599146	0.606892	0.42065	0.0753863	0.0916711	0.000361704	0.00021445	0.861727
KRT35	0	0	9.41122e-145	0	0.0586936	0.601146	0.425349	0.0762879	0.0918523	-0.000101994	6.05049e-05	0.86256
DGCR2	0	0	8.53891e-145	0	0.0587051	0.604768	0.42011	0.0755545	0.0918585	9.76024e-05	5.79007e-05	0.86256
ALKBH4	0	0	8.97978e-145	0	0.0589638	0.597984	0.4254	0.0765797	0.0919255	0.000124481	7.38613e-05	0.86256
TMEM11	0	0	9.98939e-145	0	0.0588536	0.597438	0.421909	0.0772777	0.0919456	0.00040918	0.000242803	0.86256
TGM5	0	0	1.0435e-144	0	0.0575626	0.599574	0.423567	0.0746124	0.0920455	-8.26652e-05	4.90677e-05	0.862937
SPOCK3	0	0	9.00084e-145	0	0.0592026	0.602661	0.418221	0.0754474	0.0920789	-0.000166816	9.90275e-05	0.862937
AGMAT	0	0	9.02678e-145	0	0.0594141	0.604438	0.417847	0.076296	0.0921541	-0.000105224	6.24786e-05	0.862946
CSNK2A3	0	0	9.69771e-145	0	0.0598794	0.598986	0.422385	0.0753009	0.0922028	0.000131789	7.82643e-05	0.862946
RGS19	0	0	1.13323e-144	0	0.059624	0.603624	0.425236	0.0775421	0.0922193	-0.000154501	9.17566e-05	0.862946
UBE2L3	0	0	1.04044e-144	0	0.0584845	0.605596	0.422808	0.076636	0.0923714	-0.00113719	0.000675678	0.863315
UHRF2	0	0	1.06743e-144	0	0.0604413	0.602336	0.420532	0.0777759	0.0923945	0.000142433	8.46348e-05	0.863315
WDR82	0	0	1.18782e-144	0	0.0584808	0.60267	0.422022	0.0756662	0.0923983	-0.000540222	0.000321008	0.863315
AKT1	0	0	8.49171e-145	0	0.0593769	0.604736	0.419564	0.076489	0.0924695	0.000251733	0.000149616	0.863445
IFNA4	0	0	9.36938e-145	0	0.0596597	0.603758	0.417863	0.0763126	0.0925053	0.000193207	0.000114844	0.863445
ERI3	0	0	1.31154e-144	0	0.0604885	0.601975	0.418038	0.0840316	0.0926423	-0.000218972	0.000130214	0.864015
UBE2N	0	0	1.02286e-144	0	0.0596877	0.604339	0.419686	0.0771142	0.0926595	-0.00178079	0.00105902	0.864015
MACF1	0	0	1.21258e-144	0	0.0591556	0.604825	0.41924	0.0747248	0.0927557	-3.4613e-05	2.05901e-05	0.864152
PRR36	0	0	9.84902e-145	0	0.0600153	0.595667	0.419888	0.0761396	0.0928055	0.000157911	9.39506e-05	0.864152
RSPRY1	0	0	9.54977e-145	0	0.058404	0.60872	0.416618	0.0773993	0.0929121	0.000264594	0.000157473	0.864152
MOB1A	0	0	1.11709e-144	0	0.0596654	0.602459	0.419317	0.0767534	0.0929817	0.000355609	0.000211686	0.864152
PRDM4	0	0	9.90607e-145	0	0.0599773	0.605163	0.427284	0.0755872	0.093035	0.000155664	9.26783e-05	0.864152
IRX6	0	0	1.1154e-144	0	0.0596095	0.603883	0.417743	0.0758776	0.0930517	-0.000136193	8.10904e-05	0.864152
PTPN6	0	0	9.00618e-145	0	0.0595906	0.602032	0.422424	0.0760417	0.0930709	-0.000127308	7.58041e-05	0.864152
GPC6	0	0	9.16114e-145	0	0.0591661	0.59935	0.42162	0.0747452	0.0931062	-8.25071e-05	4.91334e-05	0.864152
[truncated: 16,558 more rows]

## Sheet: Table S19 igf1
Table S19. The summary statitics for the association analysis of IGF1.
genes	const_pval	sex	age	bmi	PC1	PC2	PC3	PC4	p_value	beta_coef	std_err	fdr_bh_adj_pval
IGFALS	0	0	0	0	0.0606764	0.828681	0.665054	2.31247e-32	1.6478e-36	-0.0121431	0.000961977	3.05766e-32
IGFBP3	0	0	0	0	0.0526959	0.836615	0.728534	5.13174e-32	4.91191e-13	-0.0136846	0.00189318	4.55727e-09
C2CD4A	0	0	0	0	0.0501818	0.826177	0.723013	7.90192e-32	1.57346e-09	-0.00489711	0.000811177	9.73239e-06
JAK2	0	0	0	0	0.049723	0.832516	0.743186	2.73639e-32	1.04738e-08	-0.0041485	0.000724855	4.85878e-05
KRTAP19-4	0	0	0	0	0.0503362	0.835923	0.717547	3.33343e-32	1.75067e-06	0.0548727	0.0114785	0.00649707
WDR6	0	0	0	0	0.0479149	0.851332	0.731182	4.14358e-32	2.9641e-06	-0.003477	0.000743987	0.00916698
G6PC	0	0	0	0	0.0522697	0.818501	0.717911	3.59306e-32	3.89055e-06	-0.00623638	0.00135065	0.0103133
STAB1	0	0	0	0	0.0483041	0.849303	0.721574	2.57401e-32	4.73084e-06	-0.00193295	0.00042236	0.0109732
PDE11A	0	0	0	0	0.0505687	0.836802	0.719246	2.53397e-32	9.98169e-06	0.00200072	0.000452884	0.02058
PHC3	0	0	0	0	0.0498972	0.822508	0.724335	2.69031e-32	1.44538e-05	-0.00313239	0.000722249	0.0268205
SPSB3	0	0	0	0	0.0498994	0.835596	0.731082	5.10741e-32	1.95631e-05	-0.0046396	0.00108657	0.0330012
SIX6	0	0	0	0	0.0506932	0.830524	0.727011	3.21126e-32	3.2078e-05	0.00310558	0.000746835	0.0496033
GHRHR	0	0	0	0	0.0496622	0.831012	0.723402	3.08412e-32	5.38365e-05	-0.00584889	0.0014483	0.0768455
CRAMP1	0	0	0	0	0.0489343	0.839451	0.741161	4.78534e-32	0.000105705	-0.00258031	0.000665505	0.140104
DISP1	0	0	0	0	0.0473075	0.856807	0.731736	6.51813e-32	0.000114075	0.00334166	0.000866022	0.141119
PLEKHH3	0	0	0	0	0.0486051	0.838424	0.726278	3.29068e-32	0.000145095	-0.00288905	0.000760392	0.15433
SSTR5	0	0	0	0	0.0494232	0.838696	0.721572	4.54793e-32	0.000146709	0.0049219	0.00129637	0.15433
ZFAT	0	0	0	0	0.0503071	0.843981	0.741228	5.05191e-32	0.000149705	-0.00268276	0.000707543	0.15433
IHH	0	0	0	0	0.0494931	0.837603	0.718088	3.88133e-32	0.000166439	0.00641534	0.00170382	0.16255
MSR1	0	0	0	0	0.0496808	0.825314	0.722233	4.88747e-32	0.000175312	-0.0039733	0.00105891	0.162654
PXYLP1	0	0	0	0	0.0489278	0.834185	0.735284	3.43147e-32	0.000193148	0.00536703	0.00143969	0.164613
VPS26B	0	0	0	0	0.0517113	0.839533	0.737016	4.06358e-32	0.000195165	0.0093494	0.00250971	0.164613
OSGIN1	0	0	0	0	0.0495728	0.840409	0.723806	7.85669e-32	0.000226528	-0.0020827	0.000564797	0.178125
AGAP4	0	0	0	0	0.0490221	0.824521	0.721801	4.09593e-32	0.00023064	-0.00406972	0.00110502	0.178125
GPR34	0	0	0	0	0.0512422	0.836127	0.708108	3.53277e-32	0.00024743	0.0228282	0.00622871	0.178125
NDUFB11	0	0	0	0	0.0500151	0.834878	0.711883	4.29338e-32	0.00025808	0.0123975	0.00339267	0.178125
SHBG	0	0	0	0	0.0481261	0.84289	0.724742	4.00459e-32	0.000270623	-0.00470788	0.00129266	0.178125
CTDSP2	0	0	0	0	0.0493356	0.837003	0.707632	3.99342e-32	0.000278233	0.0133705	0.00367842	0.178125
HGS	0	0	0	0	0.0501624	0.841262	0.720615	5.01183e-32	0.000278381	-0.00300016	0.000825418	0.178125
ZDHHC19	0	0	0	0	0.0521592	0.825167	0.717866	2.83091e-32	0.000307025	-0.00443356	0.00122834	0.189905
GHSR	0	0	0	0	0.0495548	0.845548	0.715146	3.69589e-32	0.000325355	-0.00589719	0.0016407	0.191584
ACVR2A	0	0	0	0	0.049772	0.827683	0.717046	5.19654e-32	0.00033638	0.00849668	0.00236965	0.191584
P2RX5	0	0	0	0	0.0493756	0.850315	0.715531	4.02162e-32	0.000348886	0.00165527	0.000462872	0.191584
OR5R1	0	0	0	0	0.0484544	0.827637	0.720704	3.37116e-32	0.000351038	0.00418777	0.00117157	0.191584
CEP112	0	0	0	0	0.0497462	0.827852	0.714807	4.51265e-32	0.000402802	0.00216681	0.000612384	0.212853
OFD1	0	0	0	0	0.0507898	0.828877	0.713446	3.17836e-32	0.000412951	0.00973033	0.0027551	0.212853
CASTOR2	0	0	0	0	0.049208	0.843789	0.730816	5.61358e-32	0.00046162	0.00622513	0.00177751	0.231509
DERL2	0	0	0	0	0.0489719	0.83585	0.716392	4.40577e-32	0.000480531	0.0149981	0.00429566	0.234651
TRIM25	0	0	0	0	0.049475	0.823851	0.719376	3.59044e-32	0.000504488	-0.00668235	0.00192107	0.240033
CHRNB1	0	0	0	0	0.0493008	0.830551	0.728595	3.74803e-32	0.000532374	0.00516693	0.00149161	0.241149
RFXANK	0	0	0	0	0.0507688	0.829581	0.719296	3.66512e-32	0.000532826	-0.00758544	0.00218994	0.241149
HSD17B2	0	0	0	0	0.0513673	0.839211	0.72535	4.80045e-32	0.000579461	0.00373224	0.0010846	0.256011
ZDHHC4	0	0	0	0	0.0479417	0.85084	0.725075	4.51354e-32	0.000607755	-0.00295303	0.000861392	0.259549
ZNF317	0	0	0	0	0.0493548	0.832796	0.730543	5.12976e-32	0.000615444	-0.0032522	0.000949606	0.259549
EPB41L1	0	0	0	0	0.050373	0.834981	0.721257	4.07031e-32	0.000662228	-0.00286639	0.000841861	0.269223
COQ4	0	0	0	0	0.0502392	0.831326	0.730289	3.62476e-32	0.000670765	0.00267671	0.000786959	0.269223
SPAG7	0	0	0	0	0.0492256	0.833652	0.7362	5.01278e-32	0.000681907	-0.00520697	0.00153289	0.269223
AAGAB	0	0	0	0	0.0501553	0.847504	0.720833	3.67759e-32	0.000704841	-0.00339051	0.00100081	0.27248
MS4A14	0	0	0	0	0.0489401	0.835357	0.726896	3.57763e-32	0.000728775	0.00539506	0.00159684	0.274971
UBE2L3	0	0	0	0	0.0479198	0.840314	0.731615	3.94374e-32	0.000741537	0.035429	0.0105012	0.274971
DENND4C	0	0	0	0	0.0505915	0.842921	0.731788	5.19487e-32	0.000755739	0.00271382	0.000805624	0.274971
XBP1	0	0	0	0	0.0496494	0.842636	0.727989	5.33248e-32	0.000854508	-0.0047294	0.00141829	0.2975
RPRD2	0	0	0	0	0.0510617	0.83709	0.731412	3.85067e-32	0.000862577	0.00227633	0.000683181	0.2975
TAF6	0	0	0	0	0.0492297	0.831313	0.734275	7.43181e-32	0.000865759	0.00335823	0.00100819	0.2975
ZNF771	0	0	0	0	0.04964	0.8347	0.733152	3.57525e-32	0.000919307	0.00435998	0.00131555	0.310157
MAPK10	0	0	0	0	0.0501493	0.831069	0.71889	4.43688e-32	0.000952625	-0.00861705	0.00260789	0.315659
GCKR	0	0	0	0	0.0494057	0.849238	0.730005	3.17372e-32	0.000988156	-0.00211797	0.000642988	0.321688
AP1M1	0	0	0	0	0.0495097	0.836478	0.729846	4.40436e-32	0.00103354	0.00927348	0.00282616	0.330661
CTNS	0	0	0	0	0.0486343	0.835782	0.733939	7.3642e-32	0.00107064	-0.00381156	0.00116514	0.336726
SCARB1	0	0	0	0	0.0497606	0.824176	0.721805	4.52578e-32	0.00110833	-0.00341546	0.00104719	0.342769
FGB	0	0	0	0	0.048902	0.848532	0.731704	4.03381e-32	0.00114502	0.00263222	0.000809342	0.348311
PAPPA2	0	0	0	0	0.0482556	0.83264	0.715587	4.10781e-32	0.00119195	0.00301333	0.000929793	0.356073
PDGFRB	0	0	0	0	0.0482362	0.82778	0.731426	3.53435e-32	0.00122519	-0.00269181	0.000832602	0.356073
CD74	0	0	0	0	0.0490558	0.830394	0.717939	3.98557e-32	0.00123606	0.00400818	0.00124074	0.356073
PCDH19	0	0	0	0	0.0488066	0.845164	0.722409	3.36737e-32	0.00124729	0.00488996	0.0015149	0.356073
PTPRB	0	0	0	0	0.0499578	0.846708	0.726805	4.38615e-32	0.00133704	0.00162082	0.000505247	0.373655
DHX38	0	0	0	0	0.0476769	0.837281	0.722428	4.50838e-32	0.00137705	0.00225971	0.000706274	0.373655
PCDHB4	0	0	0	0	0.0516155	0.837278	0.718216	6.04399e-32	0.00140024	0.00314562	0.000984649	0.373655
AMELX	0	0	0	0	0.0494724	0.83729	0.712346	3.40967e-32	0.00140802	-0.0201211	0.00630152	0.373655
BORCS7	0	0	0	0	0.0479297	0.834362	0.720323	3.71724e-32	0.00140956	0.014862	0.00465493	0.373655
CEACAM7	0	0	0	0	0.0491718	0.840115	0.706737	4.63943e-32	0.00144601	0.012803	0.00401933	0.376604
FOXO1	0	0	0	0	0.0488422	0.821638	0.713737	4.54263e-32	0.00147202	0.00748734	0.00235436	0.376604
FAM169A	0	0	0	0	0.0499446	0.827837	0.726433	4.75571e-32	0.00149983	0.00693895	0.00218565	0.376604
MTF2	0	0	0	0	0.0480889	0.824657	0.72712	3.78693e-32	0.00150187	0.00794868	0.00250401	0.376604
PDE10A	0	0	0	0	0.0489124	0.848246	0.72484	5.48739e-32	0.00164718	0.0033704	0.00107083	0.393661
EFEMP2	0	0	0	0	0.0487597	0.842993	0.722011	3.39441e-32	0.0016507	0.00456699	0.00145129	0.393661
DIS3	0	0	0	0	0.0501393	0.835328	0.717358	4.84111e-32	0.0016538	-0.00234568	0.000745536	0.393661
FGL1	0	0	0	0	0.0489036	0.83635	0.72663	3.49068e-32	0.00167295	0.00254945	0.000811167	0.393661
PAPPA	0	0	0	0	0.0492033	0.846863	0.730975	3.79951e-32	0.00167597	0.00215526	0.000685862	0.393661
DPP7	0	0	0	0	0.049139	0.840599	0.731119	2.77687e-32	0.00174391	-0.00236834	0.000756477	0.396131
ITPRIPL2	0	0	0	0	0.0512622	0.838161	0.724316	4.78821e-32	0.00174472	0.00290972	0.000929438	0.396131
WNT9B	0	0	0	0	0.0470079	0.834997	0.724571	3.10822e-32	0.00175053	0.0030416	0.000971867	0.396131
ALG9	0	0	0	0	0.0474617	0.842214	0.719018	4.08901e-32	0.00177819	-0.0037643	0.00120456	0.397544
PPIE	0	0	0	0	0.0499916	0.847462	0.713488	4.69062e-32	0.00183857	0.0052682	0.00169113	0.406149
NKD1	0	0	0	0	0.0506742	0.829375	0.72724	3.53457e-32	0.00189938	-0.00525421	0.00169186	0.410076
ERCC6L2	0	0	0	0	0.050659	0.844427	0.724785	4.31231e-32	0.00190753	0.00307924	0.000991922	0.410076
LCK	0	0	0	0	0.0497139	0.842755	0.711897	2.76695e-32	0.00192264	-0.00793305	0.00255741	0.410076
B4GALNT3	0	0	0	0	0.0492182	0.856418	0.71926	5.60365e-32	0.00195324	0.00202553	0.000653963	0.411867
ARL1	0	0	0	0	0.0492734	0.840807	0.729714	3.40632e-32	0.00200596	0.0168295	0.00544748	0.414924
SRBD1	0	0	0	0	0.0489597	0.824402	0.734911	3.61894e-32	0.00202992	-0.00278258	0.000901714	0.414924
ITPKB	0	0	0	0	0.0503755	0.837704	0.722958	5.28188e-32	0.00203482	0.0032583	0.00105612	0.414924
WDR70	0	0	0	0	0.0503316	0.832582	0.722372	4.01965e-32	0.00208135	-0.00523062	0.00169912	0.418985
PRKCE	0	0	0	0	0.0484143	0.843521	0.729745	4.51809e-32	0.00209989	0.0023978	0.000779572	0.418985
SLC6A19	0	0	0	0	0.0501178	0.837425	0.723976	3.44841e-32	0.00214164	-0.0026703	0.000869829	0.42277
PIR	0	0	0	0	0.0500467	0.84838	0.719661	3.93845e-32	0.00217835	0.00589075	0.00192205	0.425489
NRG2	0	0	0	0	0.0513276	0.825401	0.719562	3.57688e-32	0.0022743	-0.00166773	0.000546456	0.439604
OSR1	0	0	0	0	0.0496637	0.841137	0.724542	4.11745e-32	0.00230169	0.00744274	0.00244159	0.44031
SLC34A3	0	0	0	0	0.0504528	0.845622	0.724375	4.65799e-32	0.00244562	0.00224137	0.000739715	0.457051
C1orf54	0	0	0	0	0.0513483	0.828479	0.72405	4.33845e-32	0.00244775	-0.0157204	0.00518861	0.457051
TMEM241	0	0	0	0	0.0490998	0.837067	0.720163	3.51707e-32	0.00246309	0.00434524	0.00143507	0.457051
TAS2R31	0	0	0	0	0.0490681	0.837552	0.732486	3.54036e-32	0.00251718	0.00599664	0.00198477	0.460999
ETV5	0	0	0	0	0.0485699	0.840195	0.718361	3.49691e-32	0.00253405	0.00531711	0.00176104	0.460999
STC2	0	0	0	0	0.0482686	0.837521	0.727105	4.16742e-32	0.00263514	-0.00310111	0.00103115	0.471813
PLXNA1	0	0	0	0	0.0496558	0.831017	0.726782	4.62841e-32	0.00264435	0.00221742	0.000737576	0.471813
GOLGA6A	0	0	0	0	0.0487039	0.841779	0.726361	4.77269e-32	0.00275342	0.00564453	0.00188525	0.47476
RAD52	0	0	0	0	0.048967	0.823303	0.726306	3.76024e-32	0.00276117	0.00759767	0.00253831	0.47476
PCNX3	0	0	0	0	0.0504296	0.849318	0.725372	5.14581e-32	0.00278969	0.00128048	0.000428246	0.47476
EMSY	0	0	0	0	0.0483372	0.827687	0.726235	3.24074e-32	0.00282316	0.00354288	0.00118633	0.47476
ACP2	0	0	0	0	0.0499001	0.831452	0.736062	4.90827e-32	0.00285409	0.00407279	0.0013653	0.47476
C1orf100	0	0	0	0	0.0492871	0.824237	0.725719	3.54642e-32	0.00287334	-0.00274022	0.00091922	0.47476
RAD18	0	0	0	0	0.0501918	0.835943	0.731783	4.55016e-32	0.00288722	-0.00552911	0.00185569	0.47476
SLC12A3	0	0	0	0	0.0479595	0.828043	0.725653	2.82521e-32	0.00294149	-0.00192968	0.000648885	0.47476
OR2A2	0	0	0	0	0.0486474	0.846468	0.719035	5.9636e-32	0.00294161	0.00759372	0.00255352	0.47476
CCDC47	0	0	0	0	0.0501736	0.846257	0.725522	5.45335e-32	0.00294405	-0.00274327	0.000922552	0.47476
MDGA1	0	0	0	0	0.0499357	0.844998	0.725529	4.02625e-32	0.00295195	-0.00263085	0.00088499	0.47476
ASCC3	0	0	0	0	0.0496129	0.841011	0.728884	4.56089e-32	0.00301054	-0.00235348	0.000793296	0.47476
ADCY9	0	0	0	0	0.0494524	0.847273	0.719215	4.06497e-32	0.00303551	-0.0027156	0.000916142	0.47476
EXOSC3	0	0	0	0	0.0478158	0.841997	0.721172	3.65424e-32	0.00303841	-0.00342451	0.00115542	0.47476
ANKRD34C	0	0	0	0	0.0487908	0.835661	0.71838	3.6354e-32	0.00304838	0.00484393	0.00163488	0.47476
NNMT	0	0	0	0	0.0499949	0.830803	0.714545	4.246e-32	0.00307023	0.0098884	0.00333992	0.47476
PXMP4	0	0	0	0	0.0486222	0.84206	0.720114	3.91528e-32	0.0031373	-0.00831974	0.00281643	0.478458
GOLGA3	0	0	0	0	0.050359	0.827182	0.726955	3.01778e-32	0.00314571	-0.00146344	0.000495548	0.478458
ZDHHC15	0	0	0	0	0.0487555	0.843256	0.723906	3.28017e-32	0.00317785	-0.0141755	0.00480518	0.479416
PROKR2	0	0	0	0	0.0497163	0.842725	0.719064	3.08456e-32	0.00321634	-0.00228528	0.000775641	0.481309
HOXB4	0	0	0	0	0.047061	0.844099	0.721101	3.69724e-32	0.00327597	0.00807939	0.0027475	0.484449
RNASE2	0	0	0	0	0.0497126	0.836815	0.714697	4.04214e-32	0.00329481	-0.00420464	0.00143071	0.484449
TMEM92	0	0	0	0	0.0503852	0.838183	0.726668	3.8787e-32	0.00331564	-0.0186378	0.00634606	0.484449
FAM227B	0	0	0	0	0.0506691	0.841675	0.716214	3.68522e-32	0.00336071	-0.00517636	0.00176504	0.485788
HEBP2	0	0	0	0	0.0500793	0.834374	0.715729	3.98749e-32	0.00341497	0.0024668	0.000842563	0.485788
TCP10	0	0	0	0	0.0488084	0.830074	0.732312	5.77142e-32	0.0034152	-0.00385837	0.00131788	0.485788
CGN	0	0	0	0	0.0494287	0.835811	0.726752	3.46283e-32	0.00344488	-0.00107495	0.000367503	0.485788
PID1	0	0	0	0	0.0495075	0.837761	0.723513	4.35297e-32	0.00345813	0.00547602	0.0018729	0.485788
POLR3A	0	0	0	0	0.0486455	0.830264	0.721534	5.24937e-32	0.00349066	0.00256968	0.000879755	0.485788
HEXIM2	0	0	0	0	0.0483063	0.834179	0.720701	4.23551e-32	0.00351399	-0.00593442	0.00203315	0.485788
TYK2	0	0	0	0	0.0500479	0.829023	0.717379	2.30878e-32	0.00353424	-0.00163737	0.000561313	0.485788
GHRH	0	0	0	0	0.0496569	0.841515	0.712933	3.31724e-32	0.00364843	-0.0123044	0.00423251	0.497796
PRKAA1	0	0	0	0	0.0484791	0.834322	0.721887	3.16197e-32	0.0037227	0.00553267	0.00190729	0.498663
SNX9	0	0	0	0	0.0501259	0.845634	0.724104	3.73747e-32	0.00373442	0.00219485	0.000756893	0.498663
ICAM1	0	0	0	0	0.0502398	0.840482	0.724357	4.18261e-32	0.0037354	0.00259232	0.000893986	0.498663
NELL2	0	0	0	0	0.0485878	0.839106	0.736455	3.44171e-32	0.00381602	-0.00214183	0.000740341	0.505786
BCL6B	0	0	0	0	0.0493245	0.839777	0.724931	4.28074e-32	0.00386655	-0.0046474	0.00160871	0.508849
GHRL	0	0	0	0	0.0483623	0.837439	0.719166	2.12666e-32	0.00393399	-0.00228252	0.000791592	0.510105
CENPF	0	0	0	0	0.0498922	0.841539	0.733121	4.94218e-32	0.00396764	0.00149332	0.000518374	0.510105
C2orf83	0	0	0	0	0.0499558	0.836278	0.716779	3.59354e-32	0.00402125	-0.0188643	0.00655799	0.510105
SLC44A5	0	0	0	0	0.0492202	0.836298	0.726376	3.25651e-32	0.00403095	0.00260157	0.00090465	0.510105
DEFB127	0	0	0	0	0.048589	0.833597	0.729066	3.7953e-32	0.00403471	-0.034902	0.0121378	0.510105
PSMD5	0	0	0	0	0.050264	0.83118	0.7128	3.45891e-32	0.00405431	0.00299283	0.00104137	0.510105
LZTR1	0	0	0	0	0.0497827	0.837719	0.717003	3.43172e-32	0.00406852	-0.00247571	0.000861761	0.510105
STAB2	0	0	0	0	0.0497747	0.835983	0.717928	3.28789e-32	0.00419402	-0.00136634	0.0004772	0.514534
C2orf42	0	0	0	0	0.0486972	0.83882	0.714387	4.43708e-32	0.00421796	0.00372481	0.00130173	0.514534
WWC3	0	0	0	0	0.0517058	0.827876	0.727764	3.75305e-32	0.00422387	0.00135992	0.000475331	0.514534
APPL1	0	0	0	0	0.048481	0.843254	0.719784	4.45452e-32	0.0043107	0.0034385	0.00120458	0.514534
RABEP1	0	0	0	0	0.0489127	0.831244	0.724934	4.11052e-32	0.00432078	-0.00436252	0.00152868	0.514534
E2F1	0	0	0	0	0.0489418	0.836731	0.716539	3.82394e-32	0.00436108	-0.00347554	0.00121913	0.514534
KSR2	0	0	0	0	0.048907	0.840556	0.724651	3.18594e-32	0.00436711	-0.00210862	0.000739764	0.514534
CAST	0	0	0	0	0.0503336	0.828801	0.729454	4.98516e-32	0.00440352	0.00350256	0.00122994	0.514534
EXT2	0	0	0	0	0.048718	0.838004	0.722187	4.96997e-32	0.00441152	-0.00185404	0.000651185	0.514534
MSL2	0	0	0	0	0.0498193	0.836008	0.724789	4.18603e-32	0.00441211	0.00382842	0.00134466	0.514534
MARVELD1	0	0	0	0	0.0481471	0.836416	0.728152	3.3595e-32	0.0044556	-0.0109089	0.00383576	0.514534
ZNF417	0	0	0	0	0.0480251	0.830314	0.726273	5.13475e-32	0.00449022	-0.00205054	0.000721628	0.514534
LELP1	0	0	0	0	0.0490576	0.832267	0.723602	5.54215e-32	0.00451198	0.0101858	0.00358655	0.514534
CCND2	0	0	0	0	0.0501994	0.841517	0.720673	3.19817e-32	0.0045292	-0.00670467	0.00236181	0.514534
VILL	0	0	0	0	0.0499724	0.830107	0.7352	4.06034e-32	0.00454233	0.00293761	0.00103515	0.514534
P2RX3	0	0	0	0	0.0503696	0.841644	0.725573	4.10322e-32	0.00454751	-0.00436263	0.00153749	0.514534
ORAI1	0	0	0	0	0.0472183	0.838494	0.726962	4.86627e-32	0.00462188	0.0057581	0.002033	0.51738
RAB11FIP5	0	0	0	0	0.0498412	0.827743	0.718019	3.53333e-32	0.00463217	-0.00410101	0.0014483	0.51738
SETD1B	0	0	0	0	0.0504108	0.841412	0.731646	5.59795e-32	0.00465631	-0.00254997	0.000901068	0.51738
RNF212B	0	0	0	0	0.0490406	0.839601	0.717627	3.62753e-32	0.00470468	0.00448253	0.00158582	0.517441
NRN1L	0	0	0	0	0.0492014	0.839051	0.713172	3.52892e-32	0.00480751	-0.00759007	0.0026918	0.517441
FMNL3	0	0	0	0	0.0504863	0.845272	0.726233	4.05586e-32	0.00482985	-0.00260467	0.000924226	0.517441
ZMYM3	0	0	0	0	0.0485505	0.83944	0.735416	4.15204e-32	0.00483454	0.00787966	0.00279629	0.517441
UBL7	0	0	0	0	0.0487747	0.835789	0.727722	3.98176e-32	0.00484921	-0.00631507	0.00224183	0.517441
PLPP7	0	0	0	0	0.0495789	0.843008	0.726343	3.99066e-32	0.00485709	-0.00299218	0.00106241	0.517441
TMEM150B	0	0	0	0	0.0485532	0.84151	0.713426	3.97218e-32	0.00487032	-0.00341443	0.00121271	0.517441
ADIRF	0	0	0	0	0.050216	0.829586	0.735008	4.01548e-32	0.00487994	-0.0139067	0.00494039	0.517441
CYP46A1	0	0	0	0	0.0490598	0.836509	0.722592	4.45508e-32	0.0049794	0.00677605	0.00241277	0.524987
LY6G6C	0	0	0	0	0.0486765	0.839086	0.719878	4.61576e-32	0.0050186	0.00259276	0.000924045	0.526131
PPP4R3B	0	0	0	0	0.0494674	0.83097	0.73553	6.81585e-32	0.00506653	-0.00230848	0.000823627	0.527737
FGG	0	0	0	0	0.050845	0.838053	0.729245	3.47391e-32	0.0050908	-0.00211507	0.000755039	0.527737
RSPO1	0	0	0	0	0.049821	0.832252	0.728276	4.19497e-32	0.00512877	0.00540489	0.00193109	0.528355
AZGP1	0	0	0	0	0.0507823	0.843659	0.727651	3.90691e-32	0.00516674	0.00730322	0.00261156	0.528355
AAMP	0	0	0	0	0.0489324	0.836269	0.72228	3.0425e-32	0.00518219	-0.00475288	0.00170017	0.528355
PCBP3	0	0	0	0	0.0485684	0.831122	0.719496	4.13821e-32	0.00524022	0.00535533	0.00191815	0.530585
NR1H4	0	0	0	0	0.0494197	0.83559	0.734729	4.16952e-32	0.00532533	-0.00303877	0.00109045	0.530585
BABAM1	0	0	0	0	0.048056	0.850071	0.727869	4.41734e-32	0.00533152	0.00423297	0.00151919	0.530585
ZNF655	0	0	0	0	0.0499467	0.833062	0.720803	3.26334e-32	0.00534705	0.0027012	0.000969773	0.530585
VPS9D1	0	0	0	0	0.0486856	0.844385	0.723727	4.09017e-32	0.00537186	-0.00326731	0.00117365	0.530585
TEKT4	0	0	0	0	0.0480584	0.834825	0.717695	3.69687e-32	0.00537562	0.00227558	0.000817477	0.530585
ZMAT3	0	0	0	0	0.0492836	0.830746	0.720225	4.01766e-32	0.00548616	0.00661746	0.00238291	0.538631
ARHGAP1	0	0	0	0	0.0488323	0.831543	0.716215	3.27961e-32	0.00564062	0.0033403	0.00120675	0.542355
AARS	0	0	0	0	0.0507908	0.834366	0.729967	3.15641e-32	0.00566255	-0.00154418	0.000558119	0.542355
PIM1	0	0	0	0	0.0509205	0.833364	0.735384	5.23863e-32	0.00570003	0.00769828	0.00278459	0.542355
C17orf51	0	0	0	0	0.0480865	0.833937	0.722734	4.27049e-32	0.00573184	0.0159115	0.00575922	0.542355
LRP2	0	0	0	0	0.050441	0.8261	0.715258	3.05375e-32	0.00573644	-0.0012008	0.000434677	0.542355
SESTD1	0	0	0	0	0.0493518	0.84578	0.716572	3.24154e-32	0.00579337	-0.00588257	0.00213191	0.542355
C2orf70	0	0	0	0	0.048894	0.829121	0.722532	4.96966e-32	0.00579806	0.00605642	0.00219513	0.542355
TRPC7	0	0	0	0	0.0489441	0.833807	0.729944	3.99753e-32	0.00580583	0.00356148	0.00129105	0.542355
SHC4	0	0	0	0	0.0499143	0.832181	0.720019	4.4053e-32	0.0058301	-0.00406994	0.0014761	0.542355
ASCL3	0	0	0	0	0.0489527	0.839808	0.724841	3.67822e-32	0.00583961	0.0020691	0.000750573	0.542355
CNTF	0	0	0	0	0.0489088	0.837819	0.71424	3.36047e-32	0.00587419	-0.00384244	0.00139483	0.542355
CPPED1	0	0	0	0	0.0480122	0.84205	0.726126	5.10578e-32	0.00587483	0.00265809	0.000964921	0.542355
EXOC6	0	0	0	0	0.050005	0.836409	0.719107	3.25836e-32	0.00596385	-0.00291032	0.00105838	0.547847
SLC6A8	0	0	0	0	0.0490218	0.828155	0.725125	3.74663e-32	0.00602847	-0.00764763	0.00278473	0.551056
AFG1L	0	0	0	0	0.0507726	0.836895	0.722949	3.93963e-32	0.00614614	0.0033521	0.00122343	0.555669
ACSL6	0	0	0	0	0.0481832	0.827944	0.723749	4.01648e-32	0.00615881	0.00369045	0.00134725	0.555669
CFHR4	0	0	0	0	0.0517299	0.827851	0.72204	4.16024e-32	0.00619132	0.00505361	0.00184606	0.555669
MCF2L2	0	0	0	0	0.049831	0.829018	0.718102	3.9508e-32	0.00626865	0.00208357	0.000762254	0.555669
TMEM256	0	0	0	0	0.0495468	0.848493	0.722102	3.93133e-32	0.00627563	-0.00678098	0.00248109	0.555669
MIOS	0	0	0	0	0.0493663	0.844349	0.725395	3.46417e-32	0.00630432	-0.00462544	0.00169334	0.555669
KCNJ13	0	0	0	0	0.0492952	0.83572	0.711676	4.82689e-32	0.00630455	0.0083203	0.003046	0.555669
DGKG	0	0	0	0	0.0470057	0.841127	0.727743	2.94386e-32	0.00631851	0.00259161	0.000949024	0.555669
SOX17	0	0	0	0	0.0491343	0.839266	0.724016	5.24812e-32	0.0064571	-0.00250811	0.000920861	0.565179
GRM6	0	0	0	0	0.0487835	0.83571	0.716604	5.81587e-32	0.00658313	0.00157186	0.00057847	0.573001
SLC22A14	0	0	0	0	0.0500808	0.829223	0.718971	3.94734e-32	0.00661942	-0.00284223	0.00104669	0.573001
ZNF121	0	0	0	0	0.0494918	0.849549	0.711949	3.07305e-32	0.0066391	0.00907184	0.00334204	0.573001
RAB6C	0	0	0	0	0.0488916	0.834074	0.723998	3.99483e-32	0.00669696	-0.0060232	0.00222128	0.575319
MET	0	0	0	0	0.0489595	0.849746	0.725741	4.43007e-32	0.00674495	0.00230167	0.000849569	0.576771
FBP2	0	0	0	0	0.0494594	0.839332	0.72054	4.38576e-32	0.00682347	0.00166343	0.00061486	0.57928
SPAST	0	0	0	0	0.0496948	0.845507	0.721928	2.87921e-32	0.0068685	-0.0027989	0.0010354	0.57928
GOLGA8M	0	0	0	0	0.04826	0.838259	0.7237	3.45895e-32	0.006939	0.0026908	0.000996669	0.57928
IARS	0	0	0	0	0.0513879	0.836367	0.724374	3.99718e-32	0.00701408	0.00231819	0.000859796	0.57928
IGFBP6	0	0	0	0	0.0473938	0.841352	0.719974	3.60652e-32	0.00701714	-0.00535449	0.00198603	0.57928
SOBP	0	0	0	0	0.0505411	0.840361	0.718182	3.13898e-32	0.0070279	0.0028252	0.0010481	0.57928
ZNF532	0	0	0	0	0.0492407	0.849108	0.72597	3.65981e-32	0.00703691	-0.00306848	0.00113853	0.57928
ANAPC1	0	0	0	0	0.0486379	0.839833	0.713461	4.20456e-32	0.00704252	-0.00209312	0.000776708	0.57928
LHX6	0	0	0	0	0.0499657	0.825367	0.724985	3.42065e-32	0.00717687	0.00466145	0.00173381	0.57928
RTEL1	0	0	0	0	0.0490174	0.834099	0.723627	3.58421e-32	0.00718436	-0.002847	0.00105907	0.57928
OR1E2	0	0	0	0	0.0486349	0.837245	0.730469	3.4997e-32	0.00718923	-0.00661347	0.00246038	0.57928
SLC25A3	0	0	0	0	0.0479204	0.830299	0.715692	3.53815e-32	0.00721937	0.00780447	0.00290497	0.57928
MYL3	0	0	0	0	0.0509246	0.831004	0.723722	3.31632e-32	0.00722472	-0.00667313	0.00248409	0.57928
UBE2E3	0	0	0	0	0.0499557	0.831085	0.719571	4.22696e-32	0.00722848	0.0214589	0.00798868	0.57928
TMBIM4	0	0	0	0	0.0502946	0.83905	0.726083	4.59375e-32	0.00725125	0.00503598	0.00187551	0.57928
ZNF107	0	0	0	0	0.0499303	0.832479	0.723571	5.85926e-32	0.00727378	-0.00246123	0.000916971	0.57928
COL6A6	0	0	0	0	0.0488821	0.834143	0.724786	4.51816e-32	0.00733254	0.00127188	0.000474338	0.581464
OLFML2A	0	0	0	0	0.0498714	0.833634	0.715621	3.56768e-32	0.00736827	0.00165271	0.000616738	0.581811
ADH4	0	0	0	0	0.0483081	0.834701	0.72647	3.81827e-32	0.00740741	-0.00313954	0.00117235	0.582423
TBX6	0	0	0	0	0.0489993	0.831086	0.725362	3.22599e-32	0.00748767	0.00156159	0.000583908	0.58625
KCNIP2	0	0	0	0	0.0506299	0.837399	0.72748	2.83758e-32	0.00753268	0.0041047	0.00153598	0.587296
FOXI1	0	0	0	0	0.0507033	0.853016	0.727438	3.23619e-32	0.00763044	0.005868	0.00219937	0.590344
ATL1	0	0	0	0	0.0494099	0.840276	0.721168	3.41899e-32	0.00763541	0.00772855	0.00289696	0.590344
CDV3	0	0	0	0	0.0496622	0.834109	0.724361	3.66456e-32	0.00777497	-0.00782182	0.00293863	0.592221
SPANXN5	0	0	0	0	0.0490302	0.842943	0.722139	4.00705e-32	0.00778028	-0.0961548	0.0361281	0.592221
KCNK3	0	0	0	0	0.0486568	0.844096	0.714355	3.72783e-32	0.00783168	0.00736114	0.0027681	0.592221
TESK2	0	0	0	0	0.0497536	0.839379	0.720852	3.47797e-32	0.00784538	-0.00307076	0.00115499	0.592221
RNLS	0	0	0	0	0.0507206	0.828451	0.726958	4.70085e-32	0.00789254	0.00299328	0.00112671	0.592221
PQLC3	0	0	0	0	0.0488545	0.837591	0.736755	4.04712e-32	0.00791122	0.005041	0.00189806	0.592221
RPS20	0	0	0	0	0.0490558	0.839483	0.718573	4.05816e-32	0.00791203	0.0191898	0.00722551	0.592221
ASAP1	0	0	0	0	0.0488912	0.83116	0.728338	3.63337e-32	0.0079272	-0.00364128	0.00137138	0.592221
YAE1D1	0	0	0	0	0.0502167	0.838232	0.728949	4.96589e-32	0.00796258	-0.00488398	0.00184045	0.592221
SUSD1	0	0	0	0	0.0509255	0.834656	0.722739	3.46289e-32	0.00799698	0.0017114	0.000645266	0.592221
OPTN	0	0	0	0	0.0494025	0.83085	0.713393	4.42032e-32	0.00803867	0.00587695	0.00221732	0.592221
WDR83OS	0	0	0	0	0.0490244	0.837114	0.726602	4.36571e-32	0.00808355	0.0085969	0.00324583	0.592221
DRD4	0	0	0	0	0.0493686	0.833319	0.724805	4.15905e-32	0.0080842	-0.00286477	0.00108163	0.592221
OMA1	0	0	0	0	0.048486	0.846227	0.726337	4.84514e-32	0.00810649	0.00294928	0.00111393	0.592221
VEZF1	0	0	0	0	0.0504348	0.836195	0.712257	4.63461e-32	0.00816448	0.0095867	0.00362415	0.594118
ONECUT1	0	0	0	0	0.0502187	0.831994	0.736778	3.70301e-32	0.00827841	-0.00378027	0.00143163	0.594301
NOX1	0	0	0	0	0.0479203	0.837975	0.71496	4.97049e-32	0.00828651	0.00627405	0.00237635	0.594301
SF3B3	0	0	0	0	0.0494414	0.841016	0.732716	4.29951e-32	0.00829802	-0.00490848	0.00185946	0.594301
AKTIP	0	0	0	0	0.0494916	0.84416	0.719768	5.3471e-32	0.00830097	-0.00250468	0.000948881	0.594301
ME2	0	0	0	0	0.0496066	0.842189	0.731341	3.41067e-32	0.0083544	0.00329323	0.00124865	0.594301
MRPS7	0	0	0	0	0.0478195	0.830473	0.734045	2.7538e-32	0.00835916	-0.0029615	0.00112295	0.594301
P2RX2	0	0	0	0	0.048908	0.831747	0.728825	2.56299e-32	0.00849539	0.00218397	0.000829852	0.601681
UBA2	0	0	0	0	0.0478097	0.843293	0.726201	3.85304e-32	0.00863163	0.00417985	0.00159151	0.605781
MAGEA6	0	0	0	0	0.049785	0.831619	0.721396	4.05033e-32	0.00865252	0.00965965	0.00367913	0.605781
ADGRV1	0	0	0	0	0.0503366	0.836938	0.726258	4.14165e-32	0.00872276	-0.000754405	0.000287637	0.605781
BTBD6	0	0	0	0	0.0512172	0.846409	0.724839	4.86904e-32	0.00874493	-0.00563179	0.00214798	0.605781
FFAR4	0	0	0	0	0.0504027	0.846599	0.721074	4.24916e-32	0.00874766	0.00418936	0.0015979	0.605781
OR51D1	0	0	0	0	0.0493468	0.834962	0.729107	3.34107e-32	0.00874916	0.00384746	0.00146752	0.605781
NEMF	0	0	0	0	0.0492283	0.837197	0.722905	5.03662e-32	0.00878552	-0.00258621	0.000986982	0.606037
PAM	0	0	0	0	0.0500221	0.833527	0.731262	3.15728e-32	0.00896	0.00137951	0.000527816	0.615784
CITED1	0	0	0	0	0.0481676	0.842282	0.722728	3.66502e-32	0.00901479	0.00550854	0.00210932	0.616822
TBL1XR1	0	0	0	0	0.049312	0.832709	0.721015	3.74588e-32	0.00907426	0.0164148	0.00629095	0.616822
SLC9A3R2	0	0	0	0	0.0480361	0.850007	0.723066	4.32846e-32	0.00907864	-0.0017582	0.000673869	0.616822
POU4F3	0	0	0	0	0.0484088	0.834876	0.721265	3.36148e-32	0.00914722	0.00447224	0.00171578	0.616822
OGFOD2	0	0	0	0	0.0496606	0.834808	0.717882	4.13091e-32	0.00916741	-0.00243065	0.000932791	0.616822
CHD3	0	0	0	0	0.0482192	0.840847	0.718023	3.57528e-32	0.00917898	-0.00225371	0.00086503	0.616822
FAM173A	0	0	0	0	0.048754	0.834477	0.720673	3.49135e-32	0.00920779	0.0053762	0.00206438	0.616822
GOLGA6C	0	0	0	0	0.049482	0.839866	0.725239	4.39615e-32	0.00931146	-0.00515891	0.00198386	0.621523
SH3GLB2	0	0	0	0	0.0510614	0.835224	0.732825	4.37672e-32	0.00937859	-0.00212681	0.000818643	0.622734
SNX25	0	0	0	0	0.0502877	0.832953	0.725452	2.95505e-32	0.00951224	0.0022406	0.000864058	0.622734
ADGRL1	0	0	0	0	0.0495717	0.832435	0.719902	4.19628e-32	0.0095351	-0.00214172	0.000826191	0.622734
STC1	0	0	0	0	0.0495106	0.82915	0.718285	3.16382e-32	0.00956278	-0.00485966	0.00187538	0.622734
DOCK5	0	0	0	0	0.0515292	0.843964	0.732471	3.72199e-32	0.00959508	-0.00147796	0.000570613	0.622734
UBXN6	0	0	0	0	0.0498451	0.82575	0.726473	3.94483e-32	0.00966455	-0.00247301	0.000955699	0.622734
LIMD1	0	0	0	0	0.0507706	0.843297	0.724286	2.87067e-32	0.00966741	-0.0030985	0.00119747	0.622734
SHISA3	0	0	0	0	0.0488949	0.844405	0.722785	3.38376e-32	0.00970367	-0.00600776	0.00232296	0.622734
LCA5L	0	0	0	0	0.0491892	0.834205	0.727592	3.72009e-32	0.00970683	0.00273295	0.00105677	0.622734
TADA2A	0	0	0	0	0.0502053	0.821513	0.732126	2.98771e-32	0.00971341	-0.00410076	0.00158581	0.622734
SUPV3L1	0	0	0	0	0.0498004	0.832609	0.733741	4.45428e-32	0.0097563	-0.00362878	0.00140412	0.622734
GRM2	0	0	0	0	0.0493713	0.838328	0.721428	3.47494e-32	0.00976417	-0.00278494	0.00107772	0.622734
VGLL3	0	0	0	0	0.0500297	0.831206	0.726395	3.82367e-32	0.00976588	-0.00779454	0.00301641	0.622734
SYNJ1	0	0	0	0	0.0494041	0.83993	0.721078	5.90926e-32	0.00984285	-0.00213354	0.000826525	0.623885
CETN2	0	0	0	0	0.0493216	0.845842	0.722176	3.80103e-32	0.00985992	-0.023278	0.00901989	0.623885
GPR162	0	0	0	0	0.0505482	0.831651	0.730681	3.63739e-32	0.00988479	-0.00232591	0.00090156	0.623885
CCL24	0	0	0	0	0.0483199	0.838909	0.731346	4.001e-32	0.00998836	0.00958118	0.00371902	0.628285
BBX	0	0	0	0	0.0489338	0.844502	0.717312	3.14832e-32	0.010176	-0.00191178	0.000743934	0.635542
SCP2	0	0	0	0	0.0479183	0.8327	0.730902	4.90696e-32	0.0101886	0.0040196	0.00156441	0.635542
FERMT3	0	0	0	0	0.0524933	0.831449	0.732323	3.98956e-32	0.0102263	-0.00156417	0.000609072	0.635542
KCNC4	0	0	0	0	0.0509217	0.842175	0.718552	5.65038e-32	0.0102407	-0.00308106	0.00119996	0.635542
CARD19	0	0	0	0	0.0498494	0.83633	0.730898	4.38974e-32	0.0103277	0.00375772	0.00146517	0.636185
SERPINI2	0	0	0	0	0.0491819	0.837891	0.708404	3.12728e-32	0.0103282	0.00308933	0.00120457	0.636185
PLIN3	0	0	0	0	0.0494826	0.844772	0.727214	3.27888e-32	0.010354	-0.00251968	0.000982786	0.636185
LOXL4	0	0	0	0	0.050851	0.83122	0.724989	3.09831e-32	0.0104935	-0.00191469	0.000748172	0.642632
OR10G2	0	0	0	0	0.0487223	0.839951	0.714024	4.30637e-32	0.010538	-0.00502163	0.00196335	0.643236
VRK1	0	0	0	0	0.0486333	0.838352	0.712879	3.79733e-32	0.0105922	0.00489553	0.00191538	0.644425
TRIM62	0	0	0	0	0.0487915	0.844225	0.724092	3.55925e-32	0.0107092	0.00276623	0.00108391	0.648848
MRPS26	0	0	0	0	0.0497777	0.842033	0.727511	4.43535e-32	0.0107349	-0.00529813	0.00207668	0.648848
TAS2R4	0	0	0	0	0.0485408	0.839395	0.724932	4.94519e-32	0.0108	0.00516782	0.00202728	0.649663
ANO1	0	0	0	0	0.0493774	0.840762	0.728177	3.01365e-32	0.0108495	-0.00214662	0.000842623	0.649663
DGCR6L	0	0	0	0	0.0495159	0.847409	0.725242	3.47031e-32	0.0108534	-0.00506445	0.00198807	0.649663
IQCD	0	0	0	0	0.0492537	0.828529	0.714027	2.78133e-32	0.0109883	0.00501201	0.00197082	0.652215
MAB21L3	0	0	0	0	0.0491838	0.834238	0.725907	4.01331e-32	0.0109891	0.00392347	0.0015428	0.652215
PMEL	0	0	0	0	0.0492917	0.830432	0.722728	3.68427e-32	0.0110015	0.00281652	0.00110769	0.652215
IL12RB1	0	0	0	0	0.0486042	0.832181	0.721408	3.96438e-32	0.0111284	0.00329776	0.00129901	0.655914
TERT	0	0	0	0	0.0490157	0.828497	0.722731	2.84877e-32	0.0111495	-0.00640155	0.00252227	0.655914
PDCD2	0	0	0	0	0.0486058	0.831286	0.723614	2.97375e-32	0.0111699	-0.00272037	0.00107212	0.655914
ZNF358	0	0	0	0	0.0481947	0.835514	0.72335	3.96847e-32	0.0112446	0.00588022	0.00231958	0.656169
ADAMDEC1	0	0	0	0	0.0478923	0.840577	0.724486	3.787e-32	0.0112451	-0.00320272	0.00126339	0.656169
ZNF169	0	0	0	0	0.0481291	0.829969	0.730575	3.72948e-32	0.0113074	0.00398042	0.00157137	0.656169
PTPN22	0	0	0	0	0.0490023	0.842898	0.725118	4.43489e-32	0.0113157	0.00175357	0.000692336	0.656169
GBA2	0	0	0	0	0.0497211	0.839526	0.720482	5.22791e-32	0.011356	-0.00264808	0.00104602	0.656453
GID8	0	0	0	0	0.0505915	0.837424	0.719358	3.96408e-32	0.0114128	-0.00869377	0.0034365	0.657146
HS6ST1	0	0	0	0	0.0503583	0.843737	0.72547	5.1791e-32	0.0114651	-0.00294369	0.00116433	0.657146
C2orf78	0	0	0	0	0.0506669	0.844356	0.723935	3.75707e-32	0.0115133	-0.00525976	0.00208163	0.657146
LIAS	0	0	0	0	0.0498568	0.834251	0.72228	4.43801e-32	0.0115686	0.00477332	0.00189037	0.657146
ACAP2	0	0	0	0	0.0491167	0.832576	0.723069	3.68279e-32	0.0115838	0.00510437	0.00202184	0.657146
TIMM22	0	0	0	0	0.0485468	0.837938	0.726199	4.88258e-32	0.0115906	-0.00247715	0.000981283	0.657146
ELOB	0	0	0	0	0.048678	0.829907	0.725821	3.51749e-32	0.0116159	0.0130262	0.00516166	0.657146
C5orf22	0	0	0	0	0.0502576	0.830066	0.722973	4.42142e-32	0.0117087	0.00182582	0.000724293	0.659195
STMN1	0	0	0	0	0.0485029	0.830782	0.724792	3.91309e-32	0.0117698	-0.0181819	0.00721788	0.659195
CDC20	0	0	0	0	0.0498829	0.831586	0.718328	4.24323e-32	0.0117884	0.00350095	0.00139012	0.659195
CREB3L1	0	0	0	0	0.0501378	0.831157	0.725908	4.03552e-32	0.0117942	0.00179384	0.00071233	0.659195
CABS1	0	0	0	0	0.0493767	0.826625	0.724766	4.75809e-32	0.011964	0.00776403	0.00308925	0.663546
HOXA11	0	0	0	0	0.0489426	0.831873	0.731079	5.1617e-32	0.0120037	0.00509264	0.00202727	0.663546
STYX	0	0	0	0	0.0513841	0.837428	0.719322	3.73939e-32	0.0120579	0.00693087	0.00276078	0.663546
CCDC43	0	0	0	0	0.0498657	0.831634	0.724912	4.55258e-32	0.0121144	-0.00649245	0.00258784	0.663546
PHLPP2	0	0	0	0	0.047993	0.825464	0.721138	4.62468e-32	0.0121571	0.00166292	0.000663156	0.663546
MBLAC2	0	0	0	0	0.0499469	0.849189	0.722904	3.61313e-32	0.0121983	-0.00412072	0.00164409	0.663546
C1R	0	0	0	0	0.049418	0.829675	0.721092	4.2635e-32	0.0122114	0.0108042	0.00431131	0.663546
CPOX	0	0	0	0	0.0499511	0.832211	0.725194	3.11636e-32	0.0122425	-0.0041142	0.00164233	0.663546
MPP3	0	0	0	0	0.0512871	0.83228	0.725008	3.53238e-32	0.0122513	-0.00189832	0.000757856	0.663546
ZMYM6	0	0	0	0	0.0484798	0.836595	0.719932	2.94267e-32	0.0122587	-0.00156019	0.00062292	0.663546
NECAB1	0	0	0	0	0.0494903	0.835669	0.723224	3.85828e-32	0.0122748	0.00305932	0.00122169	0.663546
CCPG1	0	0	0	0	0.0499468	0.83652	0.724565	4.28851e-32	0.0123243	0.0017545	0.000701028	0.663546
GGT7	0	0	0	0	0.0476997	0.842017	0.733589	4.5368e-32	0.0123369	-0.00321656	0.00128539	0.663546
CASS4	0	0	0	0	0.0492083	0.834382	0.734696	4.80304e-32	0.0124624	0.00322432	0.00129034	0.667718
ATP6V1G1	0	0	0	0	0.0490681	0.833492	0.726676	3.51227e-32	0.0124864	0.00444521	0.00177942	0.667718
SNRPA	0	0	0	0	0.048941	0.832837	0.722479	3.51872e-32	0.0126214	0.00829409	0.00332521	0.668972
SPTBN1	0	0	0	0	0.0484495	0.833946	0.716926	3.26369e-32	0.0126414	0.0018205	0.000730026	0.668972
CMTM2	0	0	0	0	0.0500281	0.840959	0.721937	3.32042e-32	0.0126489	-0.00472218	0.00189377	0.668972
STXBP1	0	0	0	0	0.0487632	0.828535	0.728867	4.25628e-32	0.0126777	-0.00641676	0.00257419	0.668972
NFKBID	0	0	0	0	0.0478735	0.831616	0.730134	4.33276e-32	0.0126901	0.00581211	0.00233195	0.668972
OR2T4	0	0	0	0	0.0493271	0.832098	0.725856	4.36784e-32	0.0127766	0.00623992	0.00250602	0.671622
RIMKLB	0	0	0	0	0.049414	0.833458	0.7235	4.57289e-32	0.0128847	0.00658645	0.00264838	0.673129
GCNT3	0	0	0	0	0.0480504	0.828702	0.734519	4.98267e-32	0.012925	0.00178075	0.000716352	0.673129
CHST10	0	0	0	0	0.0501514	0.827695	0.723314	4.03001e-32	0.0129497	0.00424305	0.00170734	0.673129
PARP12	0	0	0	0	0.0495773	0.833995	0.724705	3.70332e-32	0.0130015	0.00343418	0.00138265	0.673129
MRGPRX2	0	0	0	0	0.0507323	0.835635	0.718169	3.68707e-32	0.0130459	-0.00697378	0.00280913	0.673129
MRPS5	0	0	0	0	0.0498334	0.832292	0.716941	4.55784e-32	0.0130486	0.00228042	0.00091861	0.673129
NMT1	0	0	0	0	0.0500264	0.830848	0.733864	4.43547e-32	0.0130645	-0.00615483	0.00247975	0.673129
IBTK	0	0	0	0	0.0490618	0.839053	0.719671	4.62564e-32	0.0130955	0.00305196	0.00123004	0.673129
MAPRE2	0	0	0	0	0.048647	0.83065	0.721273	3.88887e-32	0.0131611	-0.00858733	0.00346345	0.674633
DYNLT1	0	0	0	0	0.0506396	0.832628	0.732053	3.80577e-32	0.0132731	-0.00822622	0.00332186	0.676142
KIF22	0	0	0	0	0.0486387	0.839022	0.719932	4.33092e-32	0.0132923	0.00320122	0.00129297	0.676142
MUT	0	0	0	0	0.050123	0.831551	0.713818	3.37865e-32	0.0132998	-0.002209	0.000892283	0.676142
GGTLC1	0	0	0	0	0.0495177	0.834854	0.731505	2.75713e-32	0.0134018	-0.00498417	0.00201548	0.67681
UBE2Q2L	0	0	0	0	0.0512407	0.84254	0.725458	3.35208e-32	0.0134092	-0.00639328	0.0025855	0.67681
CD68	0	0	0	0	0.0490814	0.8433	0.721456	4.07015e-32	0.013448	0.00519153	0.00210038	0.67681
PDE3B	0	0	0	0	0.0486889	0.833539	0.7264	4.2481e-32	0.0134983	0.00138223	0.000559523	0.67681
DPY19L4	0	0	0	0	0.0484028	0.836702	0.714485	4.23668e-32	0.0135013	0.0022734	0.000920295	0.67681
CCDC12	0	0	0	0	0.050522	0.835212	0.720885	6.21867e-32	0.013682	-0.00415893	0.00168682	0.67681
PSIP1	0	0	0	0	0.0492677	0.829683	0.732409	4.18662e-32	0.013693	0.00491758	0.00199476	0.67681
CLDND2	0	0	0	0	0.049729	0.838675	0.722184	4.92901e-32	0.0137018	0.00434619	0.00176315	0.67681
NRDC	0	0	0	0	0.050759	0.83514	0.72629	2.89032e-32	0.0137615	-0.00220333	0.000894405	0.67681
PLPP1	0	0	0	0	0.0495078	0.845445	0.718011	3.49654e-32	0.013797	0.00428959	0.00174194	0.67681
MPP1	0	0	0	0	0.0486449	0.833463	0.7283	4.36043e-32	0.0137983	0.00647123	0.00262791	0.67681
MCF2L	0	0	0	0	0.0503601	0.838951	0.718631	3.21308e-32	0.0138112	-0.00197484	0.000802073	0.67681
BCO1	0	0	0	0	0.0503282	0.826722	0.718091	3.26067e-32	0.0138304	-0.00195644	0.000794763	0.67681
CSRP1	0	0	0	0	0.0491008	0.836295	0.717432	3.77696e-32	0.0138503	-0.00501173	0.00203633	0.67681
LPCAT4	0	0	0	0	0.0513755	0.829743	0.720099	3.80472e-32	0.0138851	-0.00514325	0.00209054	0.67681
VEGFB	0	0	0	0	0.0513038	0.831472	0.721748	3.08185e-32	0.0138966	-0.00351929	0.00143063	0.67681
GOLGA5	0	0	0	0	0.0496168	0.832646	0.723792	4.69597e-32	0.0140492	0.00135821	0.000553008	0.682451
GABRG2	0	0	0	0	0.0504047	0.835667	0.717835	3.5776e-32	0.0141144	-0.00731427	0.0029801	0.682592
TBC1D19	0	0	0	0	0.0484605	0.835271	0.72862	5.02083e-32	0.0141256	0.00379501	0.00154641	0.682592
DYNAP	0	0	0	0	0.0484034	0.833885	0.721502	3.02273e-32	0.0142309	-0.0115388	0.00470699	0.685894
KRTAP10-9	0	0	0	0	0.0489382	0.828113	0.726331	4.33211e-32	0.0143323	-0.00512791	0.002094	0.686902
MARK4	0	0	0	0	0.0497556	0.836777	0.723497	4.7222e-32	0.0143539	0.00275254	0.00112426	0.686902
AURKC	0	0	0	0	0.0503564	0.830493	0.728267	4.07053e-32	0.0143635	0.00247645	0.00101159	0.686902
OR8D2	0	0	0	0	0.0484983	0.829507	0.724804	3.64537e-32	0.0144297	0.00485511	0.00198458	0.686902
CASC10	0	0	0	0	0.0490543	0.836361	0.716551	3.48915e-32	0.0144369	-0.00823529	0.00336652	0.686902
NLRP3	0	0	0	0	0.0487889	0.838077	0.725376	3.68521e-32	0.0145199	0.00326359	0.00133526	0.687755
IFT57	0	0	0	0	0.0497644	0.838238	0.721602	3.9289e-32	0.0145297	-0.00302312	0.00123699	0.687755
GTF2A2	0	0	0	0	0.0495582	0.830131	0.723099	4.14281e-32	0.0145661	0.0186835	0.0076477	0.687755
EDEM2	0	0	0	0	0.0490899	0.830852	0.726441	3.92978e-32	0.0146832	0.00282251	0.00115671	0.690736
PRF1	0	0	0	0	0.0499726	0.832617	0.736561	3.79969e-32	0.0147061	-0.00323769	0.00132716	0.690736
PARP10	0	0	0	0	0.049775	0.831682	0.725492	6.60641e-32	0.0147414	-0.00272768	0.0011185	0.690736
FLNC	0	0	0	0	0.0486678	0.84204	0.722897	3.41733e-32	0.0148096	0.000921474	0.000378113	0.690736
SLC39A3	0	0	0	0	0.0511823	0.836349	0.72538	3.64307e-32	0.0148617	-0.00522984	0.00214711	0.690736
LRRC37A2	0	0	0	0	0.0508078	0.835887	0.719369	3.32007e-32	0.0148719	-0.0053192	0.00218402	0.690736
GZF1	0	0	0	0	0.0501102	0.837482	0.72191	3.53349e-32	0.0149223	0.00364465	0.00149721	0.690736
UPF1	0	0	0	0	0.0498425	0.831966	0.718806	3.55104e-32	0.0149479	-0.00645457	0.0026522	0.690736
ITM2B	0	0	0	0	0.0492679	0.827575	0.719322	3.2848e-32	0.0149803	0.00635402	0.00261173	0.690736
COL9A3	0	0	0	0	0.0483646	0.832669	0.713916	4.58684e-32	0.0150014	-0.00154729	0.000636123	0.690736
ILK	0	0	0	0	0.0484869	0.842477	0.721572	4.17296e-32	0.0150621	0.00280297	0.00115305	0.691813
ZNF575	0	0	0	0	0.0494251	0.833274	0.736123	4.71566e-32	0.0151441	-0.00518487	0.00213462	0.693864
CAVIN1	0	0	0	0	0.0500268	0.842885	0.726941	4.95253e-32	0.0151891	-0.00244774	0.00100819	0.694208
EFCAB1	0	0	0	0	0.048808	0.838434	0.721242	4.01034e-32	0.0152726	-0.00178727	0.000736751	0.69487
ZNF823	0	0	0	0	0.0497274	0.833312	0.726039	3.57538e-32	0.0152785	-0.00427651	0.00176297	0.69487
SMARCD2	0	0	0	0	0.0498897	0.847806	0.7181	3.64636e-32	0.0153328	-0.00519328	0.00214204	0.695024
DHFR	0	0	0	0	0.0501188	0.838104	0.716501	4.36829e-32	0.0153567	-0.0118826	0.00490228	0.695024
DPYSL5	0	0	0	0	0.0482783	0.833596	0.735537	3.32933e-32	0.0154183	-0.00317795	0.00131188	0.696114
CLEC12A	0	0	0	0	0.0496971	0.835835	0.720854	2.90807e-32	0.0154853	-0.00510279	0.00210785	0.696835
FAAH	0	0	0	0	0.049523	0.826209	0.721589	4.75312e-32	0.0155411	-0.00263905	0.00109072	0.696835
GUCY2C	0	0	0	0	0.0508652	0.832115	0.713714	4.64708e-32	0.0155505	0.0021947	0.000907154	0.696835
AKIRIN1	0	0	0	0	0.0495632	0.831135	0.724808	3.97289e-32	0.0156744	0.00920542	0.0038095	0.696835
ATG101	0	0	0	0	0.0494454	0.835824	0.720098	3.61244e-32	0.015728	-0.00657459	0.00272218	0.696835
CLVS1	0	0	0	0	0.0493901	0.836756	0.721994	3.91436e-32	0.015772	-0.00624879	0.00258837	0.696835
CDH19	0	0	0	0	0.0494191	0.840087	0.716524	4.30096e-32	0.0158297	-0.00238815	0.000989762	0.696835
IKZF3	0	0	0	0	0.0489362	0.839797	0.718429	4.01978e-32	0.0158719	-0.00488593	0.00202578	0.696835
UQCC3	0	0	0	0	0.0493007	0.831213	0.725986	3.87451e-32	0.0158861	-0.00912113	0.00378227	0.696835
CPSF7	0	0	0	0	0.0506256	0.833611	0.719378	4.42501e-32	0.0159281	0.00625631	0.00259535	0.696835
XYLB	0	0	0	0	0.0494352	0.829448	0.728446	3.51039e-32	0.0159353	0.00201106	0.000834321	0.696835
ACYP1	0	0	0	0	0.047864	0.839192	0.71834	4.1274e-32	0.0159587	0.0113037	0.00469054	0.696835
ZNF684	0	0	0	0	0.0505832	0.832337	0.719817	3.19564e-32	0.0159589	-0.00237112	0.000983913	0.696835
ZNF653	0	0	0	0	0.0503611	0.83742	0.724087	3.56325e-32	0.0160568	-0.00288273	0.00119732	0.696835
SRSF5	0	0	0	0	0.0494783	0.8394	0.723194	4.45778e-32	0.0160785	0.00410342	0.00170468	0.696835
ZNRF3	0	0	0	0	0.0496091	0.837073	0.72748	4.17908e-32	0.0161008	0.00179874	0.000747404	0.696835
REXO4	0	0	0	0	0.0497169	0.830705	0.716078	4.59225e-32	0.0161666	0.00434561	0.00180679	0.696835
NMI	0	0	0	0	0.0492102	0.839938	0.719546	3.75515e-32	0.0161761	-0.00273857	0.00113872	0.696835
KDM4B	0	0	0	0	0.0502309	0.83687	0.721392	3.96674e-32	0.0162091	-0.00298549	0.00124178	0.696835
RFPL3	0	0	0	0	0.0483204	0.842674	0.727904	4.86649e-32	0.0163144	0.00378572	0.00157618	0.696835
GFI1	0	0	0	0	0.0487429	0.841329	0.720207	3.77814e-32	0.0163321	-0.00309084	0.00128708	0.696835
ALDOB	0	0	0	0	0.0486039	0.847025	0.724927	4.12731e-32	0.0163643	0.00157034	0.000654111	0.696835
MT1A	0	0	0	0	0.0503245	0.833219	0.725296	4.20022e-32	0.0164432	-0.0393959	0.0164221	0.696835
ZHX2	0	0	0	0	0.0486663	0.830601	0.717261	2.79668e-32	0.0164539	-0.00269576	0.00112384	0.696835
PYGO2	0	0	0	0	0.0489535	0.834347	0.726369	3.10919e-32	0.0164635	-0.00656033	0.00273518	0.696835
LTB4R2	0	0	0	0	0.0501741	0.837822	0.712138	3.13121e-32	0.0164885	-0.00394151	0.0016437	0.696835
ECSIT	0	0	0	0	0.0488825	0.830421	0.716701	2.73207e-32	0.0164886	0.00238043	0.000992695	0.696835
VPS37D	0	0	0	0	0.0504666	0.839853	0.724266	4.87468e-32	0.0165319	0.00358439	0.00149538	0.696835
SH3BGRL	0	0	0	0	0.0496301	0.830951	0.722491	5.24777e-32	0.0165592	-0.0117349	0.00489692	0.696835
CHST9	0	0	0	0	0.0505568	0.836833	0.728534	4.7368e-32	0.0165791	-0.00335625	0.00140081	0.696835
B3GNT9	0	0	0	0	0.0487708	0.839684	0.717226	3.05678e-32	0.0167132	-0.00351035	0.00146693	0.696835
FGD4	0	0	0	0	0.0508054	0.833563	0.723784	3.19893e-32	0.0168149	-0.00221497	0.00092647	0.696835
EML3	0	0	0	0	0.0481765	0.837467	0.730919	4.01028e-32	0.016851	-0.00230381	0.000963948	0.696835
ERN2	0	0	0	0	0.0494461	0.83694	0.727164	4.70558e-32	0.0168866	0.00143846	0.000602069	0.696835
IFFO2	0	0	0	0	0.0494528	0.833789	0.723763	4.03747e-32	0.0169069	0.00364149	0.00152443	0.696835
AMACR	0	0	0	0	0.0495772	0.833568	0.714861	3.76296e-32	0.0170186	-0.00247496	0.00103714	0.696835
HYOU1	0	0	0	0	0.0494399	0.839916	0.726069	5.9382e-32	0.0170201	-0.00247753	0.00103823	0.696835
ADCY4	0	0	0	0	0.0492304	0.837908	0.726682	4.54717e-32	0.017036	0.00145015	0.000607786	0.696835
MED12	0	0	0	0	0.0505215	0.840867	0.720514	4.20785e-32	0.0170441	0.00527146	0.00220953	0.696835
OR8A1	0	0	0	0	0.0499893	0.836818	0.720839	2.62936e-32	0.0170536	0.00442525	0.001855	0.696835
TIPARP	0	0	0	0	0.049738	0.829766	0.727292	3.76461e-32	0.0170886	0.00580766	0.00243526	0.696835
SMARCA1	0	0	0	0	0.0490546	0.837772	0.725103	3.57555e-32	0.0170906	-0.00602045	0.00252453	0.696835
ADAM23	0	0	0	0	0.0492264	0.839742	0.720878	4.20954e-32	0.017171	0.00243281	0.00102088	0.696835
MRPL20	0	0	0	0	0.0485864	0.829236	0.730689	4.97895e-32	0.0171797	0.00579794	0.00243318	0.696835
NLGN1	0	0	0	0	0.0479629	0.840807	0.71227	3.49233e-32	0.0171939	-0.00428824	0.00179984	0.696835
CRTC3	0	0	0	0	0.0492774	0.831736	0.719252	4.42616e-32	0.0172135	0.00309988	0.0013013	0.696835
RNF213	0	0	0	0	0.0488312	0.845748	0.726681	2.91934e-32	0.0172288	0.000957686	0.000402082	0.696835
KRTAP13-4	0	0	0	0	0.0491213	0.838032	0.723649	4.2412e-32	0.0172369	0.0110585	0.00464322	0.696835
TRIM41	0	0	0	0	0.0506128	0.831206	0.72443	4.92956e-32	0.0173091	0.00317507	0.001334	0.697699
GBP3	0	0	0	0	0.0487691	0.827852	0.728477	4.02533e-32	0.0173334	-0.00318095	0.00133677	0.697699
VAMP3	0	0	0	0	0.0502705	0.83742	0.72042	3.74696e-32	0.0173937	0.00610881	0.00256856	0.698608
TXNRD3	0	0	0	0	0.0491645	0.835397	0.728283	4.9098e-32	0.0174352	0.0030321	0.00127537	0.698765
RUBCNL	0	0	0	0	0.0498947	0.838689	0.720304	4.32558e-32	0.0175532	-0.00306299	0.00128971	0.701976
CNOT8	0	0	0	0	0.0485102	0.835392	0.724613	4.15527e-32	0.0175989	-0.00938541	0.00395346	0.702092
DLG5	0	0	0	0	0.0500536	0.831221	0.724714	3.27846e-32	0.0176318	-0.00129252	0.000544613	0.702092
HTN3	0	0	0	0	0.0494862	0.832379	0.72757	3.6385e-32	0.0177658	-0.00554703	0.00234004	0.70428
PYGM	0	0	0	0	0.0498962	0.836887	0.715992	3.72968e-32	0.0177894	0.00103406	0.000436313	0.70428
COX6A2	0	0	0	0	0.0498167	0.834004	0.718229	2.53406e-32	0.017817	-0.00460862	0.00194503	0.70428
ADAMTS12	0	0	0	0	0.049404	0.835071	0.720296	4.38767e-32	0.0178747	0.00175632	0.000741617	0.70428
OR51E2	0	0	0	0	0.0509306	0.837316	0.724833	4.26287e-32	0.0179784	-0.00448511	0.00189558	0.70428
WNT10B	0	0	0	0	0.0489444	0.835797	0.721891	4.21295e-32	0.017988	0.00313854	0.00132658	0.70428
NTNG2	0	0	0	0	0.0501719	0.838188	0.729396	5.08225e-32	0.0179903	-0.0022122	0.000935057	0.70428
TOP2A	0	0	0	0	0.0502343	0.835921	0.726775	4.80982e-32	0.0181529	-0.00206558	0.000874314	0.70428
AKAP3	0	0	0	0	0.0498878	0.84054	0.716886	4.5072e-32	0.0181692	0.0017957	0.000760189	0.70428
KIAA1324L	0	0	0	0	0.0496741	0.835984	0.72584	3.65704e-32	0.018268	0.00154272	0.000653649	0.70428
ETFA	0	0	0	0	0.0497268	0.839819	0.726571	3.23349e-32	0.0182738	-0.00350464	0.00148499	0.70428
GGCX	0	0	0	0	0.0496203	0.837764	0.726757	4.75199e-32	0.0183145	-0.00237661	0.00100737	0.70428
NOSTRIN	0	0	0	0	0.0496968	0.835447	0.724889	3.4132e-32	0.0183391	-0.00267094	0.00113237	0.70428
PTGIR	0	0	0	0	0.0489163	0.838018	0.726212	2.88836e-32	0.018343	-0.00154199	0.000653761	0.70428
GPR151	0	0	0	0	0.0491443	0.840249	0.723478	3.68215e-32	0.0183545	0.00107922	0.000457606	0.70428
PHGDH	0	0	0	0	0.0483229	0.838116	0.725128	4.64836e-32	0.0184431	-0.00214251	0.000909143	0.70428
ASCL5	0	0	0	0	0.0493573	0.832109	0.725791	4.5328e-32	0.0184517	0.00336705	0.00142886	0.70428
RARS	0	0	0	0	0.0503073	0.83441	0.7221	3.44497e-32	0.0184714	-0.00330223	0.00140159	0.70428
TMPRSS11A	0	0	0	0	0.0496877	0.836463	0.723771	3.42451e-32	0.018517	-0.00307285	0.00130474	0.70428
SCFD2	0	0	0	0	0.0496143	0.834753	0.72073	4.00223e-32	0.0185198	0.00160965	0.000683478	0.70428
HACL1	0	0	0	0	0.0496598	0.835998	0.725175	4.87552e-32	0.0185345	0.00221012	0.000938565	0.70428
AP1S2	0	0	0	0	0.0508997	0.832198	0.721052	4.03505e-32	0.0185479	0.0211458	0.00898095	0.70428
NDUFAF4	0	0	0	0	0.0499969	0.843475	0.717774	3.55885e-32	0.0185596	-0.00837395	0.00355689	0.70428
C17orf58	0	0	0	0	0.0496011	0.837632	0.723573	3.44081e-32	0.0186767	0.0130841	0.00556307	0.704688
C15orf62	0	0	0	0	0.0480961	0.833603	0.72401	4.03556e-32	0.0187405	0.00422936	0.00179921	0.704688
LENG9	0	0	0	0	0.0496699	0.83585	0.726919	3.18455e-32	0.0187838	-0.00244712	0.00104141	0.704688
ZNF440	0	0	0	0	0.0501799	0.835176	0.720864	4.22768e-32	0.0188025	-0.00186728	0.000794774	0.704688
UGT2B15	0	0	0	0	0.0482542	0.837771	0.71924	4.22919e-32	0.0188064	0.00157826	0.000671779	0.704688
GINM1	0	0	0	0	0.0486251	0.842718	0.719823	4.14543e-32	0.0188381	0.0050133	0.00213446	0.704688
LRRD1	0	0	0	0	0.0490417	0.844479	0.730078	4.35747e-32	0.0188689	0.00195158	0.000831116	0.704688
PPT1	0	0	0	0	0.0494993	0.830206	0.721226	3.35319e-32	0.0188742	0.00237634	0.00101206	0.704688
NPTXR	0	0	0	0	0.0493409	0.834258	0.72226	5.00327e-32	0.019123	0.00183544	0.000783323	0.711302
POTEI	0	0	0	0	0.0497261	0.839464	0.720305	4.31342e-32	0.0191332	0.00209657	0.000894843	0.711302
APIP	0	0	0	0	0.0492634	0.837991	0.717399	3.6494e-32	0.0191664	0.00150747	0.000643584	0.711302
CXCL13	0	0	0	0	0.0494097	0.835683	0.71946	3.68387e-32	0.0193323	-0.0131356	0.00561569	0.712645
HEBP1	0	0	0	0	0.049281	0.835762	0.723747	3.81827e-32	0.0193393	-0.00382337	0.00163465	0.712645
DDC	0	0	0	0	0.0498882	0.83865	0.717867	4.25584e-32	0.019346	0.00349103	0.00149265	0.712645
GCAT	0	0	0	0	0.0492454	0.830378	0.718029	4.87391e-32	0.01944	-0.00133872	0.000572832	0.712645
TMEM51	0	0	0	0	0.0491822	0.837101	0.718845	3.55697e-32	0.0194519	0.00396821	0.00169815	0.712645
FAM159B	0	0	0	0	0.0498564	0.838076	0.722027	3.26855e-32	0.019462	-0.00258515	0.00110638	0.712645
C9orf16	0	0	0	0	0.0507885	0.839334	0.726832	4.77317e-32	0.0194946	-0.00744846	0.0031886	0.712645
FST	0	0	0	0	0.0492772	0.831653	0.7257	4.19755e-32	0.0195396	0.00365113	0.00156359	0.712645
GTF3C3	0	0	0	0	0.049745	0.835506	0.717758	4.34673e-32	0.0195901	0.00336667	0.00144237	0.712645
UVSSA	0	0	0	0	0.0491289	0.83404	0.720963	3.64942e-32	0.0197141	-0.0016307	0.000699338	0.712645
IL20RB	0	0	0	0	0.0499858	0.83039	0.731786	4.06985e-32	0.0197226	0.0067822	0.0029088	0.712645
HKR1	0	0	0	0	0.0496434	0.828435	0.729349	6.04871e-32	0.0197404	0.00134083	0.000575149	0.712645
MEGF8	0	0	0	0	0.0492404	0.836407	0.725819	5.74027e-32	0.019744	0.000983516	0.000421892	0.712645
FIP1L1	0	0	0	0	0.0507837	0.835254	0.7305	4.25824e-32	0.0197984	0.00427633	0.0018352	0.712645
CAPN10	0	0	0	0	0.0493531	0.832191	0.727354	2.4624e-32	0.0198187	-0.00159089	0.000682847	0.712645
SLC27A2	0	0	0	0	0.0496955	0.832405	0.721124	3.1773e-32	0.0198236	-0.00335407	0.0014397	0.712645
GPR183	0	0	0	0	0.0492393	0.841644	0.728923	4.20266e-32	0.0198863	0.00741209	0.00318319	0.712645
SLIT1	0	0	0	0	0.0498608	0.829606	0.723807	3.1438e-32	0.0200335	0.00171372	0.000736846	0.712645
METTL8	0	0	0	0	0.0488748	0.845005	0.718416	3.15189e-32	0.0200629	-0.00242643	0.00104354	0.712645
OR8G1	0	0	0	0	0.0491314	0.834115	0.72882	4.04194e-32	0.020134	0.0120925	0.00520359	0.712645
LSMEM1	0	0	0	0	0.0498921	0.835225	0.718519	3.69074e-32	0.0201614	-0.00808387	0.00347939	0.712645
CHMP3	0	0	0	0	0.0491916	0.829213	0.723448	4.56279e-32	0.0202673	-0.0505831	0.02179	0.712645
MBOAT7	0	0	0	0	0.0489778	0.842272	0.725916	5.39592e-32	0.0202974	-0.00265532	0.00114412	0.712645
TSHZ2	0	0	0	0	0.0484174	0.839354	0.725256	3.66255e-32	0.020408	-0.00170037	0.000733301	0.712645
RAB6B	0	0	0	0	0.0500143	0.841594	0.72558	2.46507e-32	0.0204501	0.00443387	0.00191279	0.712645
PAX8	0	0	0	0	0.0477406	0.846314	0.728475	3.96009e-32	0.0204506	0.0036812	0.00158809	0.712645
TIMP4	0	0	0	0	0.049974	0.839727	0.727746	3.81616e-32	0.0204535	0.00390699	0.00168554	0.712645
KRTAP10-2	0	0	0	0	0.0502809	0.833487	0.721869	3.60324e-32	0.0204722	-0.00580291	0.00250384	0.712645
RECQL5	0	0	0	0	0.0498122	0.832693	0.726004	4.30092e-32	0.0205685	0.00146102	0.000630884	0.712645
WASHC2C	0	0	0	0	0.0490674	0.83617	0.728126	3.5468e-32	0.0205986	-0.00148044	0.000639419	0.712645
FLT3	0	0	0	0	0.0489226	0.843101	0.726806	3.38457e-32	0.020614	-0.00304194	0.00131401	0.712645
FXYD4	0	0	0	0	0.049675	0.83234	0.72604	3.95621e-32	0.020634	0.0107277	0.00463472	0.712645
BRPF3	0	0	0	0	0.0499093	0.831051	0.716343	4.44022e-32	0.0206788	0.00154166	0.000666281	0.712645
PASK	0	0	0	0	0.0492003	0.839069	0.724972	4.05117e-32	0.0206992	0.00139959	0.00060498	0.712645
PSMB11	0	0	0	0	0.050541	0.842663	0.717127	6.03278e-32	0.0208377	0.00145432	0.00062932	0.712645
NSUN7	0	0	0	0	0.0504553	0.830695	0.715644	4.7751e-32	0.0208433	-0.00306206	0.00132509	0.712645
SHISA5	0	0	0	0	0.0484516	0.841502	0.72512	4.19533e-32	0.0209123	-0.00368996	0.00159767	0.712645
IRX6	0	0	0	0	0.0495865	0.832876	0.72678	3.77039e-32	0.0209183	-0.00297487	0.00128811	0.712645
DNAJC5G	0	0	0	0	0.0485411	0.832448	0.726704	3.93073e-32	0.0210448	-0.00615981	0.00266982	0.712645
MFSD12	0	0	0	0	0.0499398	0.838926	0.723321	2.41583e-32	0.0210502	0.00166099	0.000719945	0.712645
KDM4A	0	0	0	0	0.0502564	0.83453	0.732498	4.10286e-32	0.0210554	0.00235984	0.0010229	0.712645
CYBB	0	0	0	0	0.048965	0.836394	0.723352	4.74135e-32	0.0211117	0.00383799	0.00166435	0.712645
TIGIT	0	0	0	0	0.0494866	0.836175	0.727777	4.20641e-32	0.0211952	0.00498874	0.00216477	0.712645
TYROBP	0	0	0	0	0.0482801	0.83158	0.725284	3.96959e-32	0.0212861	0.00781958	0.00339555	0.712645
EIF4H	0	0	0	0	0.0485899	0.829897	0.729097	3.61542e-32	0.0213012	0.00956063	0.00415205	0.712645
ADARB1	0	0	0	0	0.0493535	0.828423	0.716612	3.27364e-32	0.0213349	0.00422812	0.00183669	0.712645
TNFSF12	0	0	0	0	0.0486588	0.832908	0.72183	3.64333e-32	0.0213841	0.0194372	0.00844669	0.712645
NCR3	0	0	0	0	0.0491627	0.834564	0.726262	4.03632e-32	0.0214432	0.00244529	0.00106312	0.712645
EIF3H	0	0	0	0	0.0498974	0.83016	0.716979	3.57935e-32	0.0214442	-0.00679807	0.00295556	0.712645
IL33	0	0	0	0	0.0511118	0.840898	0.715539	4.03977e-32	0.0214544	-0.00779828	0.00339068	0.712645
CLDN18	0	0	0	0	0.0490582	0.839073	0.728466	3.75921e-32	0.021483	0.00252043	0.00109612	0.712645
FRS3	0	0	0	0	0.0500148	0.841823	0.718188	3.36811e-32	0.0215002	-0.0031117	0.00135344	0.712645
CCT4	0	0	0	0	0.0502687	0.836271	0.728235	4.35714e-32	0.0215205	0.00313617	0.00136429	0.712645
SPINK8	0	0	0	0	0.050729	0.83359	0.722944	3.3429e-32	0.0215246	-0.0130016	0.00565614	0.712645
GMPPA	0	0	0	0	0.0488377	0.828353	0.722745	3.38271e-32	0.0215291	0.00255142	0.00110999	0.712645
CNGB3	0	0	0	0	0.0496093	0.834992	0.723398	3.44423e-32	0.0215769	-0.00196967	0.000857214	0.712645
NFATC4	0	0	0	0	0.0491081	0.831348	0.731602	3.89011e-32	0.0216135	0.00158931	0.00069187	0.712645
ART4	0	0	0	0	0.0493018	0.835109	0.734669	1.07218e-31	0.0216546	-0.00301683	0.00131372	0.712645
TRA2B	0	0	0	0	0.0485496	0.840097	0.72626	3.56824e-32	0.0216687	-0.0118551	0.00516305	0.712645
PCDHA5	0	0	0	0	0.0484378	0.841048	0.727253	4.29288e-32	0.021705	0.00317421	0.00138279	0.712645
TPD52	0	0	0	0	0.0477431	0.841778	0.724705	3.41044e-32	0.0217127	-0.00489809	0.00213389	0.712645
RRP15	0	0	0	0	0.0499539	0.843224	0.721873	3.46214e-32	0.02177	-0.00470636	0.00205126	0.712645
TMEFF2	0	0	0	0	0.0498629	0.843605	0.728518	3.90282e-32	0.0217914	0.00549838	0.00239684	0.712645
DAPK1	0	0	0	0	0.0487146	0.82566	0.72557	5.06928e-32	0.0218333	0.00230484	0.00100504	0.712645
CHST4	0	0	0	0	0.05015	0.826628	0.719125	4.00467e-32	0.0218769	-0.00201933	0.000880832	0.712645
FUT9	0	0	0	0	0.0505586	0.84181	0.729793	4.11674e-32	0.0219076	0.00664618	0.00289974	0.712645
NAGA	0	0	0	0	0.0492384	0.835182	0.722789	4.13758e-32	0.0220406	-0.00179473	0.000783828	0.712645
OR10H2	0	0	0	0	0.0496269	0.832474	0.727093	3.51744e-32	0.0220417	0.00398248	0.00173932	0.712645
NSMF	0	0	0	0	0.0491836	0.835412	0.721546	3.06982e-32	0.0221033	0.00294802	0.00128812	0.712645
KRT40	0	0	0	0	0.0506449	0.83109	0.728923	6.27272e-32	0.0221109	-0.00158421	0.000692253	0.712645
CHRM1	0	0	0	0	0.0480905	0.834339	0.725474	4.1522e-32	0.022174	0.00726054	0.00317415	0.712645
TF	0	0	0	0	0.048901	0.829659	0.719942	4.57198e-32	0.0221853	0.00173008	0.000756419	0.712645
ZNF365	0	0	0	0	0.0479563	0.833043	0.724785	4.54152e-32	0.0222356	0.00436813	0.00191053	0.712645
THOC1	0	0	0	0	0.0489578	0.835998	0.724204	3.52347e-32	0.0224976	-0.00578606	0.00253565	0.712645
GYPA	0	0	0	0	0.0493812	0.833071	0.722868	3.61545e-32	0.0225274	0.00256208	0.00112304	0.712645
LSM1	0	0	0	0	0.0489222	0.82947	0.725206	3.74617e-32	0.0225971	0.00791732	0.0034722	0.712645
SPINK14	0	0	0	0	0.0493492	0.838779	0.71699	4.33805e-32	0.0226167	-0.0141229	0.00619459	0.712645
SORL1	0	0	0	0	0.0507569	0.838338	0.726323	4.90367e-32	0.0226464	-0.00127784	0.000560612	0.712645
PIP5K1B	0	0	0	0	0.04901	0.836199	0.724669	4.28733e-32	0.0226592	0.00385728	0.00169242	0.712645
DERL1	0	0	0	0	0.0497453	0.829357	0.72122	3.48003e-32	0.0226599	-0.00396908	0.00174148	0.712645
UNC45B	0	0	0	0	0.0497458	0.827296	0.727441	3.19556e-32	0.0226676	0.00110651	0.000485522	0.712645
ASPHD2	0	0	0	0	0.049425	0.83702	0.732348	4.18113e-32	0.0227896	-0.00592992	0.00260431	0.712645
TAF8	0	0	0	0	0.0490673	0.834512	0.725115	3.86372e-32	0.0227979	-0.00187881	0.000825187	0.712645
SYT17	0	0	0	0	0.0503383	0.834385	0.721745	3.50308e-32	0.0228259	0.00299418	0.00131534	0.712645
GOLGA8A	0	0	0	0	0.0493458	0.842726	0.721345	5.28832e-32	0.0228968	0.00258321	0.00113539	0.712645
OR4S1	0	0	0	0	0.0489497	0.842611	0.724321	4.45513e-32	0.0229326	0.00499497	0.002196	0.712645
SYCP2	0	0	0	0	0.0493906	0.836452	0.735785	3.54306e-32	0.0229533	-0.00273543	0.00120279	0.712645
CEPT1	0	0	0	0	0.0502405	0.835631	0.724407	4.88313e-32	0.0229977	-0.00351723	0.00154706	0.712645
WDR33	0	0	0	0	0.0494315	0.832138	0.729393	3.34904e-32	0.0230278	-0.0022263	0.000979457	0.712645
THBS3	0	0	0	0	0.0504675	0.83566	0.723681	4.25147e-32	0.0230984	0.00192825	0.000848768	0.712645
USP39	0	0	0	0	0.0487485	0.832545	0.724666	5.18036e-32	0.0231202	-0.00285807	0.00125825	0.712645
KIF1A	0	0	0	0	0.0490637	0.829342	0.724588	4.21192e-32	0.0231346	0.00156493	0.000689026	0.712645
CEP97	0	0	0	0	0.0499804	0.837045	0.725078	3.52577e-32	0.0231448	0.00162471	0.000715397	0.712645
SLFN12	0	0	0	0	0.0491233	0.828533	0.717413	3.54719e-32	0.0231591	-0.0031761	0.00139866	0.712645
RETSAT	0	0	0	0	0.050431	0.841145	0.717159	3.69078e-32	0.0232075	0.00147913	0.000651593	0.712645
MBOAT2	0	0	0	0	0.0509006	0.830895	0.717149	3.74517e-32	0.0232765	-0.00422984	0.00186428	0.712645
ST8SIA4	0	0	0	0	0.0502807	0.84234	0.713574	3.72328e-32	0.0232862	-0.00596401	0.00262879	0.712645
ERCC6	0	0	0	0	0.0500941	0.843966	0.722855	2.84573e-32	0.0233007	0.000943512	0.000415921	0.712645
GAS2L1	0	0	0	0	0.0496699	0.842263	0.723244	2.86939e-32	0.0233422	-0.00297055	0.00130988	0.712645
DLEU7	0	0	0	0	0.0496497	0.840429	0.723195	3.25731e-32	0.0233612	-0.00468956	0.00206816	0.712645
NLRP11	0	0	0	0	0.049125	0.842932	0.720768	3.88962e-32	0.0233955	0.00402971	0.0017776	0.712645
TATDN2	0	0	0	0	0.0505359	0.8316	0.727516	4.58052e-32	0.0234256	0.00166731	0.000735651	0.712645
DHX30	0	0	0	0	0.0496228	0.841287	0.730245	3.87574e-32	0.0234318	0.00471418	0.00208008	0.712645
MYL1	0	0	0	0	0.0497615	0.833421	0.718721	3.23144e-32	0.0235209	-0.00210025	0.000927306	0.712645
ADCY1	0	0	0	0	0.050523	0.832678	0.713275	3.05031e-32	0.0235363	-0.00351984	0.00155426	0.712645
CDR2	0	0	0	0	0.0490219	0.834605	0.726268	4.04896e-32	0.0235378	0.00485774	0.00214506	0.712645
ATG13	0	0	0	0	0.0497196	0.834824	0.724612	4.66912e-32	0.0235633	0.00165884	0.00073264	0.712645
YIF1A	0	0	0	0	0.0491922	0.836873	0.716904	3.89624e-32	0.0235822	0.00270843	0.00119636	0.712645
FAM13A	0	0	0	0	0.0498247	0.840644	0.721534	3.32964e-32	0.0236335	0.00195458	0.000863691	0.712645
LACTBL1	0	0	0	0	0.0495934	0.828176	0.725879	3.80156e-32	0.0236362	0.00142672	0.000630449	0.712645
KIAA1683	0	0	0	0	0.0486653	0.831411	0.726259	6.05251e-32	0.0236818	0.00187371	0.000828241	0.712645
ZNF805	0	0	0	0	0.0501503	0.837211	0.729629	3.51693e-32	0.0236924	-0.0027011	0.00119406	0.712645
COG7	0	0	0	0	0.0477658	0.842624	0.726562	3.85674e-32	0.0237306	-0.00250424	0.00110734	0.712645
LGALS2	0	0	0	0	0.0486	0.831378	0.718998	3.39679e-32	0.0238635	0.00809503	0.00358291	0.712645
TUBB4A	0	0	0	0	0.0509505	0.834974	0.720033	3.80163e-32	0.023888	0.00498061	0.00220483	0.712645
ERMP1	0	0	0	0	0.0492438	0.834289	0.725377	3.72599e-32	0.0239797	-0.00264194	0.00117031	0.712645
SYNE1	0	0	0	0	0.0494693	0.834237	0.723301	3.35573e-32	0.0240262	0.000574835	0.00025472	0.712645
CD46	0	0	0	0	0.0488677	0.832933	0.727629	4.43764e-32	0.0240262	0.00896649	0.00397322	0.712645
KLHL1	0	0	0	0	0.0496804	0.827812	0.724708	3.36953e-32	0.0240833	0.00245246	0.00108717	0.712645
PEG10	0	0	0	0	0.0492094	0.8345	0.72011	3.5298e-32	0.0241329	0.00843534	0.00374068	0.712645
GAGE10	0	0	0	0	0.0487978	0.831691	0.718163	4.36114e-32	0.0242078	0.0295185	0.013097	0.712645
CNTNAP2	0	0	0	0	0.0495418	0.83233	0.714902	3.17163e-32	0.0242107	-0.00155131	0.000688312	0.712645
IL1RN	0	0	0	0	0.0495973	0.836529	0.725261	4.32173e-32	0.0242401	0.00642044	0.00284932	0.712645
RIMBP3	0	0	0	0	0.0487404	0.831524	0.724197	3.36852e-32	0.0242647	0.00212739	0.000944272	0.712645
GYG1	0	0	0	0	0.049839	0.830405	0.717214	3.5703e-32	0.0243232	-0.00199451	0.000885657	0.712645
CHEK2	0	0	0	0	0.0489874	0.835724	0.726975	5.52444e-32	0.024339	0.00213876	0.000949816	0.712645
PKP4	0	0	0	0	0.0496097	0.832218	0.729248	3.99111e-32	0.024347	0.00119812	0.000532113	0.712645
GCG	0	0	0	0	0.0496566	0.828924	0.723413	3.41628e-32	0.0243702	0.00487069	0.00216353	0.712645
IFI27	0	0	0	0	0.0501008	0.830797	0.723525	3.50835e-32	0.0243789	-0.00851149	0.00378099	0.712645
MINPP1	0	0	0	0	0.0493834	0.838828	0.723284	4.67632e-32	0.0244183	0.00450266	0.00200073	0.712645
DPH7	0	0	0	0	0.0490463	0.832195	0.725026	3.5349e-32	0.024458	-0.00349425	0.00155308	0.712645
RBMS1	0	0	0	0	0.0494334	0.833916	0.723684	3.58842e-32	0.0244614	-0.0052423	0.00233009	0.712645
CARHSP1	0	0	0	0	0.050249	0.835609	0.726925	3.45196e-32	0.0244811	-0.00296508	0.0013181	0.712645
ELF5	0	0	0	0	0.0499627	0.837643	0.716815	3.90601e-32	0.0244966	0.00497755	0.00221296	0.712645
CACNA1A	0	0	0	0	0.051081	0.834762	0.720968	3.62089e-32	0.0245088	-0.00141435	0.000628858	0.712645
CD4	0	0	0	0	0.0491988	0.851442	0.723574	4.63743e-32	0.0245875	-0.00297837	0.00132499	0.712645
CPNE3	0	0	0	0	0.0506497	0.826992	0.719057	3.83559e-32	0.0245973	-0.00148643	0.000661312	0.712645
FLNA	0	0	0	0	0.0494981	0.840196	0.724538	3.77132e-32	0.0245999	-0.00193469	0.000860759	0.712645
TMX3	0	0	0	0	0.0502334	0.836227	0.722602	4.87552e-32	0.0246145	-0.00414866	0.00184596	0.712645
HIST1H3J	0	0	0	0	0.049569	0.833349	0.721382	4.26334e-32	0.0246158	-0.0116015	0.00516217	0.712645
CDC42BPA	0	0	0	0	0.0493783	0.840095	0.719644	3.06588e-32	0.024631	-0.00201104	0.000894923	0.712645
SLC37A3	0	0	0	0	0.0496013	0.832491	0.724335	4.824e-32	0.0246598	0.00322977	0.00143755	0.712645
PAH	0	0	0	0	0.0503054	0.823824	0.719457	3.21413e-32	0.0246945	0.00143464	0.000638707	0.712645
SCG2	0	0	0	0	0.0498248	0.835229	0.726274	3.76905e-32	0.0248078	-0.00551074	0.00245532	0.713322
ADGRA1	0	0	0	0	0.049828	0.842351	0.715603	4.46357e-32	0.0248121	-0.00321762	0.00143366	0.713322
ULBP3	0	0	0	0	0.0507052	0.831387	0.727418	3.61706e-32	0.0248333	-0.00211862	0.000944123	0.713322
SEMA3E	0	0	0	0	0.049222	0.832266	0.717811	3.35521e-32	0.0248937	0.00278674	0.00124237	0.713551
ITGB1BP2	0	0	0	0	0.0492754	0.84456	0.724463	3.97006e-32	0.0249235	0.00627476	0.00279797	0.713551
C19orf48	0	0	0	0	0.0487927	0.83619	0.727997	4.13571e-32	0.024968	0.0190168	0.00848236	0.713551
LARP4	0	0	0	0	0.0488759	0.835583	0.72186	4.07767e-32	0.0249951	-0.00452645	0.00201938	0.713551
CWC22	0	0	0	0	0.049772	0.841867	0.726739	4.78601e-32	0.0252531	0.00247356	0.00110549	0.716851
CHSY1	0	0	0	0	0.0490088	0.831458	0.730791	3.82275e-32	0.0252945	0.00258097	0.00115382	0.716851
KRTAP10-7	0	0	0	0	0.0497945	0.830114	0.726141	4.48722e-32	0.0252995	0.00428353	0.00191501	0.716851
FGF3	0	0	0	0	0.0492639	0.830963	0.728799	3.7984e-32	0.0253447	0.00416761	0.00186376	0.716851
JARID2	0	0	0	0	0.0499937	0.841043	0.722899	4.42496e-32	0.0254814	-0.00190807	0.000854085	0.716851
TBC1D30	0	0	0	0	0.0479486	0.8299	0.725645	4.92016e-32	0.0255353	-0.00145373	0.000650954	0.716851
TP53I11	0	0	0	0	0.0507125	0.84181	0.726473	3.29498e-32	0.0255516	-0.00748569	0.00335233	0.716851
GABRG3	0	0	0	0	0.0494785	0.844874	0.718106	4.10081e-32	0.0256174	0.00353487	0.00158373	0.716851
MYH7	0	0	0	0	0.049218	0.842477	0.713406	3.87038e-32	0.0256307	0.00156009	0.000699034	0.716851
PODNL1	0	0	0	0	0.0498608	0.828019	0.721201	3.84451e-32	0.025642	-0.00229803	0.00102976	0.716851
PROKR1	0	0	0	0	0.0505514	0.829283	0.716843	3.0948e-32	0.0256588	-0.00315539	0.00141411	0.716851
NCOR1	0	0	0	0	0.0497592	0.838447	0.723342	4.13546e-32	0.0256782	0.00146895	0.000658406	0.716851
LUM	0	0	0	0	0.049384	0.83382	0.720625	3.91346e-32	0.025686	-0.00250508	0.00112288	0.716851
CSNK2A2	0	0	0	0	0.051059	0.835308	0.715183	3.82242e-32	0.0257003	-0.00579608	0.00259828	0.716851
UNC5D	0	0	0	0	0.0486881	0.835711	0.731729	3.77468e-32	0.0257211	-0.00177445	0.000795568	0.716851
INHBE	0	0	0	0	0.0489369	0.838538	0.720893	3.50574e-32	0.0257469	0.00265512	0.00119062	0.716851
IRF2BPL	0	0	0	0	0.0486693	0.832864	0.723868	3.80822e-32	0.0257674	0.00306541	0.00137479	0.716851
ASPH	0	0	0	0	0.0489578	0.840837	0.727205	4.44543e-32	0.0258679	0.00210155	0.000943156	0.718249
SLC10A5	0	0	0	0	0.0509954	0.837842	0.725281	4.24998e-32	0.025895	-0.00350323	0.0015725	0.718249
ACOT1	0	0	0	0	0.0491814	0.836829	0.730725	3.75987e-32	0.0262246	-0.0062451	0.00280945	0.722427
CKS1B	0	0	0	0	0.0485402	0.839245	0.721657	4.21349e-32	0.0263104	0.0124164	0.00558891	0.722427
DOCK11	0	0	0	0	0.0478486	0.837505	0.714986	4.02827e-32	0.0263105	-0.00254067	0.00114361	0.722427
ZGLP1	0	0	0	0	0.0492195	0.842732	0.718425	2.77571e-32	0.0263575	0.00759228	0.00341852	0.722427
PCDHA12	0	0	0	0	0.0482397	0.830485	0.727766	2.70456e-32	0.0263658	-0.00156417	0.000704324	0.722427
MAMDC2	0	0	0	0	0.0493405	0.830009	0.718649	3.54486e-32	0.0264318	-0.00178293	0.000803182	0.722427
ZNF253	0	0	0	0	0.0490291	0.838022	0.725644	4.95217e-32	0.0264661	0.00353254	0.00159172	0.722427
PACRGL	0	0	0	0	0.0495865	0.83492	0.721948	2.81036e-32	0.0265009	0.00258958	0.0011671	0.722427
NDUFA4L2	0	0	0	0	0.0495224	0.829434	0.723752	4.62759e-32	0.026543	0.00805427	0.003631	0.722427
GART	0	0	0	0	0.0510656	0.832682	0.71993	4.2334e-32	0.0265802	-0.00227686	0.0010267	0.722427
CYP7A1	0	0	0	0	0.050194	0.830692	0.720176	3.25476e-32	0.0266565	0.00231449	0.00104419	0.722427
CTRB2	0	0	0	0	0.050148	0.826572	0.726605	3.93477e-32	0.0267255	-0.00341291	0.00154045	0.722427
SLC6A4	0	0	0	0	0.049292	0.832145	0.720242	4.43719e-32	0.0267443	0.00397149	0.00179279	0.722427
AFF4	0	0	0	0	0.0496057	0.833875	0.731	4.68989e-32	0.0267799	0.00313552	0.00141576	0.722427
FOXO4	0	0	0	0	0.0495372	0.833809	0.724486	3.70125e-32	0.0268255	-0.00899882	0.00406438	0.722427
CCDC13	0	0	0	0	0.0491517	0.830461	0.723375	4.03775e-32	0.0268419	-0.00196703	0.000888519	0.722427
LRTM1	0	0	0	0	0.0499705	0.836331	0.724011	4.37532e-32	0.0268578	0.00437341	0.0019757	0.722427
IL17RB	0	0	0	0	0.0483643	0.822693	0.741515	4.28763e-32	0.0268847	0.00169787	0.000767154	0.722427
MIB1	0	0	0	0	0.0503537	0.831565	0.719465	3.81847e-32	0.0269387	-0.00223034	0.0010081	0.722427
E4F1	0	0	0	0	0.0494407	0.833493	0.720031	3.57669e-32	0.0270132	-0.00188524	0.000852528	0.722427
SLC44A2	0	0	0	0	0.0497655	0.836703	0.716745	4.64259e-32	0.0270144	0.00135526	0.00061287	0.722427
KDELC2	0	0	0	0	0.0498366	0.84083	0.724782	5.09114e-32	0.0270196	0.00144367	0.000652871	0.722427
CLPB	0	0	0	0	0.0483851	0.839411	0.725767	3.44934e-32	0.0270207	-0.00154562	0.000698984	0.722427
CEP68	0	0	0	0	0.0489487	0.837818	0.717166	4.48168e-32	0.0270699	0.00294944	0.00133427	0.722427
HSD17B13	0	0	0	0	0.0492495	0.83054	0.722882	4.24774e-32	0.0271027	0.00312359	0.00141335	0.722427
MTERF2	0	0	0	0	0.0476125	0.848763	0.724228	3.58636e-32	0.0271147	0.00611015	0.00276492	0.722427
CARMIL1	0	0	0	0	0.0503628	0.837897	0.723212	5.16675e-32	0.0271249	0.00158634	0.000717888	0.722427
MSRB3	0	0	0	0	0.0492011	0.837723	0.722777	4.21852e-32	0.0271358	0.00833507	0.00377224	0.722427
RCN2	0	0	0	0	0.0493838	0.840265	0.71611	4.52055e-32	0.0272352	0.0038305	0.00173471	0.722924
ATAD3C	0	0	0	0	0.0500897	0.836089	0.716578	3.70626e-32	0.0272498	0.00217089	0.000983218	0.722924
TSPAN15	0	0	0	0	0.0485861	0.847793	0.733193	4.54227e-32	0.0273098	-0.002009	0.000910252	0.722924
ADRA1A	0	0	0	0	0.0485176	0.834729	0.719578	3.30841e-32	0.0273103	0.00232284	0.00105245	0.722924
FAM135B	0	0	0	0	0.0491214	0.835889	0.724984	4.14031e-32	0.0274289	-0.00272247	0.00123447	0.723142
C14orf28	0	0	0	0	0.0497101	0.836948	0.724627	3.69852e-32	0.0274353	-0.00440643	0.00199812	0.723142
THEM4	0	0	0	0	0.0488995	0.833743	0.718097	4.1878e-32	0.0274355	-0.00287513	0.00130374	0.723142
RPLP1	0	0	0	0	0.0481666	0.839977	0.725921	4.99234e-32	0.0275712	0.0113112	0.00513364	0.725286
ANKRD22	0	0	0	0	0.0494881	0.8406	0.721414	4.03694e-32	0.0276124	0.0034001	0.00154355	0.725286
NKAIN4	0	0	0	0	0.0490783	0.839315	0.721825	4.36575e-32	0.027634	0.00408795	0.00185608	0.725286
G2E3	0	0	0	0	0.0495473	0.834084	0.730065	3.53797e-32	0.0277232	0.00360399	0.00163728	0.726597
CMTM5	0	0	0	0	0.0504685	0.834569	0.709976	3.93052e-32	0.0278193	0.00267694	0.00121688	0.72796
TRIM27	0	0	0	0	0.050556	0.8283	0.727514	4.10159e-32	0.0278536	-0.00394244	0.00179254	0.72796
PDCD10	0	0	0	0	0.0492298	0.833812	0.721702	3.97008e-32	0.0279735	0.00874273	0.00397816	0.730037
CDK12	0	0	0	0	0.0493958	0.83798	0.719373	3.39193e-32	0.0280118	-0.00272943	0.00124226	0.730037
KEAP1	0	0	0	0	0.0492085	0.844453	0.71834	3.67297e-32	0.028108	-0.0037928	0.0017273	0.731518
HIST1H1E	0	0	0	0	0.0505088	0.832902	0.720579	4.45523e-32	0.0281577	0.00288593	0.00131471	0.731785
CNTROB	0	0	0	0	0.0491768	0.826019	0.72392	5.12052e-32	0.0282414	0.00137761	0.000627918	0.731975
FAM19A1	0	0	0	0	0.0490253	0.846618	0.720845	4.2004e-32	0.0282439	-0.00715385	0.00326079	0.731975
PDF	0	0	0	0	0.0492359	0.836735	0.720996	4.20686e-32	0.0283316	0.00401105	0.00182928	0.732685
SOX11	0	0	0	0	0.0487816	0.832971	0.720689	3.69899e-32	0.0284103	-0.0064688	0.00295164	0.732685
PCYT2	0	0	0	0	0.0490577	0.833677	0.719403	3.16674e-32	0.028423	-0.00229837	0.0010488	0.732685
DPEP1	0	0	0	0	0.0479873	0.833941	0.724061	3.65607e-32	0.0284448	-0.0029651	0.00135324	0.732685
HRH1	0	0	0	0	0.0496134	0.841796	0.72773	3.58551e-32	0.0284687	-0.00391975	0.0017892	0.732685
CNR1	0	0	0	0	0.0495418	0.836432	0.7295	3.38544e-32	0.0286071	-0.00575396	0.00262872	0.732981
FOXN4	0	0	0	0	0.0492719	0.8309	0.734955	3.91219e-32	0.028616	-0.00166015	0.000758491	0.732981
H3F3A	0	0	0	0	0.0493142	0.841015	0.725099	3.34582e-32	0.0286193	0.0169263	0.00773346	0.732981
SLC22A13	0	0	0	0	0.0492967	0.841264	0.722491	3.67847e-32	0.0286383	0.00233058	0.00106495	0.732981
PROCA1	0	0	0	0	0.0493875	0.836262	0.720769	4.38916e-32	0.0287044	-0.00469389	0.00214574	0.733287
COA5	0	0	0	0	0.0491596	0.841186	0.714976	5.37488e-32	0.0287459	0.0146283	0.00668882	0.733287
ACBD6	0	0	0	0	0.0488096	0.836922	0.720055	3.43923e-32	0.0288072	-0.00517548	0.00236741	0.733287
CXCL17	0	0	0	0	0.0505573	0.833474	0.726273	4.00125e-32	0.0288279	-0.013953	0.00638332	0.733287
GPR88	0	0	0	0	0.0498972	0.839223	0.721659	3.53935e-32	0.0288551	-0.00889193	0.00406864	0.733287
NFIC	0	0	0	0	0.0486707	0.842836	0.720898	4.15828e-32	0.0289386	-0.00204976	0.000938386	0.733287
TEDDM1	0	0	0	0	0.0496405	0.835395	0.72458	3.33415e-32	0.0289505	0.00724953	0.0033191	0.733287
KAZN	0	0	0	0	0.0493942	0.843284	0.730375	5.15045e-32	0.0289663	-0.00181766	0.000832276	0.733287
GAPT	0	0	0	0	0.049201	0.844138	0.725971	3.902e-32	0.0291459	-0.00717098	0.00328713	0.736826
DCDC2C	0	0	0	0	0.0502436	0.84036	0.721872	3.79602e-32	0.0292135	-0.00460097	0.00210994	0.737531
IFT27	0	0	0	0	0.048651	0.837716	0.722623	5.25692e-32	0.0293698	0.00189982	0.000872074	0.740048
C20orf27	0	0	0	0	0.0504328	0.843475	0.723438	4.17748e-32	0.0293929	-0.00488145	0.00224105	0.740048
SDHAF3	0	0	0	0	0.0494012	0.831425	0.728182	4.16844e-32	0.0294352	-0.00533456	0.00244971	0.740108
IPO9	0	0	0	0	0.0493172	0.835127	0.719028	3.92757e-32	0.0294774	-0.00374259	0.0017191	0.740166
ASXL2	0	0	0	0	0.0490486	0.83983	0.728586	3.37108e-32	0.0296349	0.00200073	0.000919892	0.743115
BPIFA3	0	0	0	0	0.050068	0.837588	0.715273	4.40524e-32	0.029706	0.00565619	0.00260173	0.743806
MIPEP	0	0	0	0	0.0501484	0.831663	0.723373	3.03412e-32	0.029762	0.00172066	0.00079174	0.743806
TAS2R16	0	0	0	0	0.0494611	0.83219	0.724285	3.94173e-32	0.0297827	-0.00671595	0.00309065	0.743806
KCNH3	0	0	0	0	0.0497384	0.832503	0.717889	4.88341e-32	0.0298914	0.00305228	0.00140558	0.745456
ZFP3	0	0	0	0	0.0498047	0.837492	0.723293	3.99671e-32	0.029964	-0.00534301	0.00246155	0.745456
PARP1	0	0	0	0	0.0495875	0.837016	0.727094	4.36962e-32	0.0299693	0.00195835	0.000902252	0.745456
ZACN	0	0	0	0	0.0496562	0.82898	0.723667	4.63661e-32	0.0300552	0.00175107	0.000807174	0.746344
LAMB1	0	0	0	0	0.0508705	0.82776	0.724882	5.24998e-32	0.0301079	0.00138246	0.000637464	0.746344
MDH2	0	0	0	0	0.0506593	0.833294	0.717577	2.99124e-32	0.0301313	-0.00362477	0.00167165	0.746344
TOR1AIP2	0	0	0	0	0.0494295	0.838352	0.724037	3.5012e-32	0.0302168	0.00352373	0.00162589	0.746344
SP110	0	0	0	0	0.0496062	0.83456	0.72486	4.15475e-32	0.0302343	0.00160399	0.000740181	0.746344
ZSCAN1	0	0	0	0	0.050233	0.831183	0.717576	5.10696e-32	0.030253	-0.00240709	0.0011109	0.746344
PRMT2	0	0	0	0	0.0492828	0.835126	0.722428	3.19604e-32	0.0303986	0.00254542	0.00117578	0.746344
DPP10	0	0	0	0	0.0490036	0.832541	0.721635	4.58037e-32	0.0304248	-0.00151225	0.00069865	0.746344
SLC7A6OS	0	0	0	0	0.0490081	0.838216	0.718132	3.98243e-32	0.0304658	0.00423696	0.00195793	0.746344
KRTAP10-6	0	0	0	0	0.049246	0.836101	0.719004	3.85532e-32	0.0305006	-0.00514951	0.00238012	0.746344
DPF2	0	0	0	0	0.0489145	0.840087	0.722973	3.7029e-32	0.030519	-0.00741298	0.00342668	0.746344
NFAT5	0	0	0	0	0.0492352	0.832384	0.727128	3.77515e-32	0.0305745	0.00249835	0.00115526	0.746344
PSG9	0	0	0	0	0.0506184	0.837234	0.724441	3.96932e-32	0.0306076	0.00329567	0.00152425	0.746344
EREG	0	0	0	0	0.0494351	0.840426	0.72713	4.06565e-32	0.0306308	-0.00604227	0.00279494	0.746344
SSTR3	0	0	0	0	0.0498904	0.830306	0.723416	3.6229e-32	0.0306439	0.00234581	0.00108518	0.746344
LIMS2	0	0	0	0	0.0484608	0.843761	0.722832	3.99487e-32	0.0306511	0.00150443	0.000695979	0.746344
C8orf4	0	0	0	0	0.0494184	0.84267	0.714176	3.27719e-32	0.0307122	0.00740475	0.00342685	0.746344
TTC22	0	0	0	0	0.0492596	0.843946	0.716582	4.57837e-32	0.0307939	0.00311441	0.00144203	0.746344
CASTOR1	0	0	0	0	0.0496507	0.838277	0.714871	3.6729e-32	0.0308427	0.00372796	0.00172661	0.746344
OR11G2	0	0	0	0	0.0489156	0.836029	0.730815	3.5569e-32	0.0308516	-0.00669098	0.00309911	0.746344
SEL1L2	0	0	0	0	0.0493622	0.8336	0.724092	2.89083e-32	0.0309262	-0.00319441	0.00148023	0.746344
OR14J1	0	0	0	0	0.0498291	0.832814	0.723972	4.46347e-32	0.0309491	0.00529808	0.00245537	0.746344
CALM2	0	0	0	0	0.0491999	0.833782	0.721094	4.17365e-32	0.0309664	0.0118759	0.00550442	0.746344
SCN8A	0	0	0	0	0.0493479	0.839259	0.724082	3.55107e-32	0.0309906	-0.00325867	0.00151059	0.746344
KATNB1	0	0	0	0	0.0496952	0.833469	0.715929	3.48865e-32	0.0311164	-0.00175091	0.000812261	0.746344
TSC1	0	0	0	0	0.0498443	0.835247	0.723335	4.6482e-32	0.0311178	0.00234079	0.00108592	0.746344
MSI1	0	0	0	0	0.049964	0.828721	0.728883	3.72682e-32	0.0312286	0.00294519	0.00136721	0.746344
EYA3	0	0	0	0	0.049189	0.839048	0.72068	4.52661e-32	0.0312296	0.0041357	0.00191987	0.746344
ANP32E	0	0	0	0	0.0487986	0.835327	0.730739	3.36834e-32	0.0312635	0.00470346	0.00218387	0.746344
TXNDC12	0	0	0	0	0.0488842	0.842157	0.729755	4.5286e-32	0.0313952	0.00257043	0.00119441	0.746344
MPST	0	0	0	0	0.0492585	0.8384	0.729563	4.39135e-32	0.0314177	-0.00174996	0.000813266	0.746344
PCDHB16	0	0	0	0	0.048216	0.834547	0.730115	3.83301e-32	0.0314634	0.00150386	0.000699086	0.746344
SNRNP48	0	0	0	0	0.0489468	0.831644	0.723288	3.7759e-32	0.0315222	-0.00308251	0.00143343	0.746344
ACTR2	0	0	0	0	0.0501501	0.836162	0.731056	4.08924e-32	0.0315966	0.00825862	0.00384211	0.746344
SF3A1	0	0	0	0	0.0490597	0.836844	0.717704	3.87152e-32	0.0316029	0.00391267	0.00182034	0.746344
UBE2E1	0	0	0	0	0.0487508	0.834305	0.720835	3.81098e-32	0.0316573	0.0160414	0.0074655	0.746344
HIST1H2BA	0	0	0	0	0.0494904	0.839227	0.725147	4.3286e-32	0.0317036	0.00663917	0.00309065	0.746344
PPIAL4G	0	0	0	0	0.0487881	0.834725	0.719405	3.61835e-32	0.0317055	0.0216075	0.0100588	0.746344
PRPF18	0	0	0	0	0.0507019	0.827837	0.727537	2.84667e-32	0.0318312	-0.00405424	0.00188873	0.746344
FBF1	0	0	0	0	0.0492672	0.835649	0.733411	3.45667e-32	0.0318742	-0.00138405	0.000644941	0.746344
IFI35	0	0	0	0	0.0497399	0.839466	0.722211	2.81087e-32	0.0318963	-0.0019514	0.000909434	0.746344
ELL2	0	0	0	0	0.0493089	0.838949	0.720133	3.13795e-32	0.0319001	0.00311992	0.00145405	0.746344
TAS2R46	0	0	0	0	0.0494725	0.837683	0.728958	4.38731e-32	0.0319346	-0.00740977	0.00345404	0.746344
ZBTB41	0	0	0	0	0.0502112	0.831538	0.723085	3.72056e-32	0.0319482	-0.00341045	0.00158989	0.746344
CROT	0	0	0	0	0.0480955	0.833198	0.731201	6.57725e-32	0.0319682	-0.00121732	0.000567559	0.746344
RSPH6A	0	0	0	0	0.0501854	0.84284	0.723775	3.97561e-32	0.0320195	-0.00189286	0.000882786	0.746344
SCN9A	0	0	0	0	0.0492447	0.833684	0.714657	2.85002e-32	0.032028	-0.0010839	0.000505529	0.746344
SHROOM4	0	0	0	0	0.0500704	0.83539	0.713862	3.08815e-32	0.0320608	-0.00233643	0.00108992	0.746344
ZFP82	0	0	0	0	0.0489129	0.834946	0.718958	3.875e-32	0.0320903	0.00532337	0.00248372	0.746344
ZNF484	0	0	0	0	0.0500007	0.836861	0.723641	3.38181e-32	0.0321069	0.00280499	0.00130885	0.746344
ZHX3	0	0	0	0	0.0484423	0.843406	0.726968	3.67403e-32	0.0321366	-0.00273471	0.00127627	0.746344
PRMT6	0	0	0	0	0.049512	0.843685	0.724402	3.7146e-32	0.0321587	0.00381039	0.00177852	0.746344
AP3B1	0	0	0	0	0.0495742	0.841038	0.734812	9.20195e-32	0.0321696	-0.00161546	0.00075407	0.746344
UPK3A	0	0	0	0	0.0487953	0.836067	0.720723	3.51588e-32	0.0321769	-0.00349625	0.00163206	0.746344
CPB1	0	0	0	0	0.0501016	0.836925	0.714612	3.64995e-32	0.0322596	-0.00234021	0.00109294	0.746594
APOL3	0	0	0	0	0.048185	0.834249	0.720978	3.11867e-32	0.0323241	0.00514662	0.00240451	0.746594
DARS	0	0	0	0	0.0491397	0.835582	0.721441	3.56208e-32	0.0323519	-0.00278496	0.00130135	0.746594
ZNF324B	0	0	0	0	0.0500402	0.833863	0.727878	4.25483e-32	0.0324018	0.00360921	0.00168699	0.746594
IARS2	0	0	0	0	0.049099	0.842279	0.724289	3.68707e-32	0.0324331	0.00216316	0.00101127	0.746594
HEXDC	0	0	0	0	0.0494712	0.833583	0.725346	5.91293e-32	0.032492	0.0023597	0.00110352	0.746594
KRT4	0	0	0	0	0.0509169	0.830117	0.720201	3.16231e-32	0.0325993	-0.00169427	0.000792827	0.746594
VCPKMT	0	0	0	0	0.0495367	0.837131	0.726885	4.06407e-32	0.0326957	0.00169833	0.000795163	0.746594
NUP188	0	0	0	0	0.0500257	0.838998	0.722053	5.23891e-32	0.0327578	0.000905654	0.000424182	0.746594
TSPAN13	0	0	0	0	0.0498616	0.834657	0.72816	3.38761e-32	0.0328037	0.00755275	0.00353842	0.746594
SYDE1	0	0	0	0	0.0507045	0.841472	0.721326	3.69332e-32	0.0328534	-0.00340996	0.001598	0.746594
TNFRSF21	0	0	0	0	0.0497036	0.84134	0.728547	3.24053e-32	0.0328539	-0.00227876	0.00106789	0.746594
UTP14C	0	0	0	0	0.0488937	0.841415	0.723252	3.59204e-32	0.032899	-0.0015821	0.000741608	0.746594
BCL11A	0	0	0	0	0.0478295	0.834495	0.730425	3.99541e-32	0.0329347	0.00414046	0.00194124	0.746594
ARID3C	0	0	0	0	0.0483328	0.828094	0.722132	3.52498e-32	0.032965	0.00305102	0.0014307	0.746594
NPR2	0	0	0	0	0.0502351	0.840996	0.721987	4.24055e-32	0.0331222	0.00229585	0.00107755	0.746594
OR10AG1	0	0	0	0	0.0485615	0.837001	0.724328	4.09131e-32	0.0331285	-0.00485617	0.00227931	0.746594
BHLHE40	0	0	0	0	0.0492719	0.836162	0.720039	2.96383e-32	0.0332045	-0.0051814	0.00243301	0.746594
ACE2	0	0	0	0	0.050084	0.834325	0.721285	4.09221e-32	0.0332289	0.00382175	0.00179482	0.746594
MAP2	0	0	0	0	0.0482109	0.830481	0.723362	3.83889e-32	0.0332414	0.00176769	0.000830223	0.746594
CFAP73	0	0	0	0	0.0495705	0.837045	0.72554	4.3187e-32	0.033362	-0.00247759	0.00116443	0.746594
TOMM20	0	0	0	0	0.0492009	0.845786	0.719673	3.80305e-32	0.033381	0.0164239	0.00771982	0.746594
HACE1	0	0	0	0	0.0495471	0.841839	0.714621	3.2538e-32	0.0334048	-0.00350732	0.00164879	0.746594
OR10K1	0	0	0	0	0.0499381	0.840371	0.725265	4.37514e-32	0.0334861	0.00435836	0.00204981	0.746594
EHBP1	0	0	0	0	0.0492841	0.831694	0.717338	3.69618e-32	0.0334866	-0.001428	0.000671615	0.746594
CD180	0	0	0	0	0.04995	0.830328	0.726736	4.25889e-32	0.0336939	0.00367144	0.00172876	0.746594
PRRC2C	0	0	0	0	0.0489576	0.836232	0.719095	4.5356e-32	0.0337371	-0.00157586	0.000742205	0.746594
CCDC42	0	0	0	0	0.049561	0.833422	0.723122	4.51389e-32	0.0337771	-0.00189878	0.000894493	0.746594
FCER2	0	0	0	0	0.0494763	0.833081	0.727918	3.7961e-32	0.0337851	0.004936	0.0023254	0.746594
SMG6	0	0	0	0	0.0489178	0.832585	0.733107	4.38777e-32	0.0338194	0.00173587	0.000817942	0.746594
OLAH	0	0	0	0	0.050867	0.839708	0.720161	3.03853e-32	0.0338364	-0.00211367	0.000996057	0.746594
STUM	0	0	0	0	0.0493234	0.836007	0.725609	3.99386e-32	0.0338539	-0.00889535	0.0041923	0.746594
MRO	0	0	0	0	0.049217	0.834064	0.716219	4.73062e-32	0.0338548	0.00343515	0.00161897	0.746594
MMP26	0	0	0	0	0.0494133	0.835768	0.727539	4.08798e-32	0.0338735	-0.00387233	0.0018252	0.746594
ENAM	0	0	0	0	0.0497175	0.839156	0.717508	4.44328e-32	0.0338859	0.00307204	0.00144809	0.746594
HRASLS2	0	0	0	0	0.0500455	0.835503	0.724475	3.73219e-32	0.0338994	0.00332745	0.0015686	0.746594
MRPL57	0	0	0	0	0.0497991	0.830818	0.728569	3.76737e-32	0.0339397	-0.00243339	0.00114739	0.746594
OCLM	0	0	0	0	0.0491288	0.83633	0.724467	5.00227e-32	0.0339459	0.0142088	0.00669997	0.746594
ERICH5	0	0	0	0	0.0503859	0.842568	0.730144	3.80146e-32	0.0339498	-0.0026619	0.0012552	0.746594
PDZK1IP1	0	0	0	0	0.0494092	0.836441	0.725962	4.4788e-32	0.0339797	-0.00556867	0.00262632	0.746594
TCEA2	0	0	0	0	0.0491268	0.838306	0.725065	3.89295e-32	0.0339881	0.00545279	0.00257179	0.746594
PKNOX1	0	0	0	0	0.0511829	0.828081	0.715718	3.27126e-32	0.0340437	-0.00487162	0.0022984	0.746594
SIMC1	0	0	0	0	0.0490316	0.836687	0.720231	4.09964e-32	0.0340954	0.0026277	0.00124009	0.746594
KLRG1	0	0	0	0	0.0499226	0.835098	0.722967	4.57001e-32	0.0341319	0.00723499	0.0034151	0.746594
CUL3	0	0	0	0	0.0494879	0.836118	0.727327	3.51074e-32	0.0341553	-0.00559469	0.00264118	0.746594
LDHD	0	0	0	0	0.0487791	0.840752	0.727788	3.6366e-32	0.0341824	0.00232512	0.00109783	0.746594
CDKN2C	0	0	0	0	0.0496912	0.839868	0.72551	3.8745e-32	0.034197	-0.0121344	0.00572981	0.746594
TEX22	0	0	0	0	0.0493585	0.839628	0.725839	3.50949e-32	0.0342252	-0.01042	0.00492105	0.746594
RFX6	0	0	0	0	0.0502296	0.838469	0.728709	4.31401e-32	0.034271	0.00187673	0.000886551	0.746594
DHRS7	0	0	0	0	0.0488712	0.833625	0.731984	3.93809e-32	0.0343093	0.00468619	0.00221419	0.746594
LIM2	0	0	0	0	0.0491131	0.837012	0.718153	3.14059e-32	0.0343373	-0.0032547	0.00153806	0.746594
KCNT2	0	0	0	0	0.0495257	0.834315	0.723018	3.47494e-32	0.0343913	-0.00292782	0.001384	0.746594
OR56A1	0	0	0	0	0.0490485	0.836624	0.718336	4.29568e-32	0.0343965	0.00211997	0.00100216	0.746594
PIGP	0	0	0	0	0.0492511	0.833295	0.725286	3.65839e-32	0.0344006	-0.00549932	0.0025997	0.746594
CAPN2	0	0	0	0	0.0510295	0.839277	0.724306	4.09874e-32	0.0344519	-0.00125925	0.000595457	0.746594
RGN	0	0	0	0	0.0490341	0.828775	0.724942	4.04926e-32	0.0344615	0.00361876	0.00171128	0.746594
S100A2	0	0	0	0	0.0493149	0.838417	0.724507	4.00085e-32	0.0345743	-0.00422118	0.00199741	0.746594
NEIL1	0	0	0	0	0.049109	0.830143	0.720171	4.44289e-32	0.0345763	0.00265845	0.00125796	0.746594
FXYD5	0	0	0	0	0.0488823	0.841148	0.723914	3.5791e-32	0.0346038	0.00570057	0.00269787	0.746594
APH1A	0	0	0	0	0.0506881	0.831387	0.723375	4.10368e-32	0.0346114	0.00860078	0.00407061	0.746594
CNKSR2	0	0	0	0	0.0495498	0.832727	0.728797	4.04311e-32	0.034642	0.00751663	0.0035581	0.746594
ZNF644	0	0	0	0	0.0505678	0.837739	0.725076	4.75818e-32	0.0347997	-0.00165169	0.000782531	0.748201
NCF4	0	0	0	0	0.0491506	0.830598	0.726067	4.38119e-32	0.0348776	-0.00271248	0.00128566	0.748201
LMF2	0	0	0	0	0.0495039	0.832464	0.723343	4.01895e-32	0.034897	0.00166893	0.000791124	0.748201
WDR92	0	0	0	0	0.0491835	0.84147	0.720752	4.66682e-32	0.0349179	0.00397096	0.00188257	0.748201
STAT5B	0	0	0	0	0.0502136	0.830644	0.716811	3.70072e-32	0.0349253	-0.0046135	0.00218728	0.748201
RBP1	0	0	0	0	0.0497599	0.827564	0.721259	3.58441e-32	0.034965	0.00303733	0.00144032	0.748201
FMR1NB	0	0	0	0	0.0503775	0.836139	0.724844	3.65919e-32	0.0350747	0.0158079	0.00750072	0.748201
POLK	0	0	0	0	0.049805	0.827247	0.72718	3.41942e-32	0.0351819	0.00161849	0.000768414	0.748201
MAP7D2	0	0	0	0	0.0508351	0.833373	0.724151	4.09357e-32	0.0352017	-0.00500888	0.00237833	0.748201
DHRS2	0	0	0	0	0.049573	0.841308	0.729522	4.36342e-32	0.0352331	0.00143375	0.000680892	0.748201
RAD50	0	0	0	0	0.0504333	0.837352	0.721179	3.17183e-32	0.0352476	-0.00134592	0.000639231	0.748201
GLYATL2	0	0	0	0	0.0492584	0.831936	0.720852	4.74733e-32	0.0352651	0.00840786	0.00399362	0.748201
ACOX1	0	0	0	0	0.0502759	0.838904	0.726752	3.00506e-32	0.0352825	-0.00225954	0.00107335	0.748201
CKAP5	0	0	0	0	0.0493742	0.832229	0.722643	3.7681e-32	0.0353114	-0.00195213	0.000927469	0.748201
FAM161B	0	0	0	0	0.0494821	0.833534	0.720071	3.54731e-32	0.0353729	-0.00265841	0.00126345	0.748201
FNIP1	0	0	0	0	0.0488025	0.838202	0.722684	3.5456e-32	0.0353757	-0.00167729	0.000797171	0.748201
ARHGEF9	0	0	0	0	0.0490492	0.836833	0.720237	3.78766e-32	0.035422	0.0110176	0.00523771	0.748201
FARSA	0	0	0	0	0.0490123	0.844758	0.728785	4.57854e-32	0.0354565	0.00238929	0.00113606	0.748201
YJEFN3	0	0	0	0	0.0498063	0.83432	0.725701	4.17139e-32	0.035517	-0.00163286	0.000776651	0.748201
LIPE	0	0	0	0	0.0482967	0.838857	0.72128	3.52881e-32	0.0355472	0.00109922	0.000522919	0.748201
CCDC96	0	0	0	0	0.0489356	0.835714	0.738388	6.13939e-32	0.0355633	-0.00339564	0.00161551	0.748201
MAN1C1	0	0	0	0	0.0496307	0.841774	0.722205	5.14928e-32	0.0358444	0.00300049	0.00142969	0.750213
MARCO	0	0	0	0	0.0497972	0.838995	0.729011	3.32683e-32	0.0358791	0.00336833	0.00160526	0.750213
PIGZ	0	0	0	0	0.0495122	0.838202	0.719815	3.63393e-32	0.0359153	0.00196161	0.000935032	0.750213
HOXA10	0	0	0	0	0.0495102	0.838217	0.721078	3.31405e-32	0.0360109	-0.00389904	0.0018595	0.750213
LYPD3	0	0	0	0	0.0500604	0.835863	0.721303	3.37604e-32	0.0360462	-0.00293433	0.00139968	0.750213
NOTCH2NL	0	0	0	0	0.0476454	0.835513	0.7275	3.63741e-32	0.0360575	0.0172261	0.00821738	0.750213
SCARF1	0	0	0	0	0.0495987	0.841331	0.729732	4.50019e-32	0.0361283	0.00246469	0.00117618	0.750213
SSC4D	0	0	0	0	0.0491445	0.845569	0.73018	4.06016e-32	0.0361764	0.00256352	0.00122366	0.750213
NT5C1A	0	0	0	0	0.0490898	0.838658	0.727552	5.14811e-32	0.0362387	-0.00189312	0.000903956	0.750213
ADGRA2	0	0	0	0	0.0501241	0.832067	0.718613	3.79095e-32	0.0362544	0.00127689	0.000609759	0.750213
INSM1	0	0	0	0	0.0507684	0.837998	0.727986	3.76579e-32	0.0363137	-0.00302749	0.00144619	0.750213
ADAMTS10	0	0	0	0	0.0497031	0.843407	0.724314	4.58822e-32	0.0363786	0.00160842	0.000768591	0.750213
SBDS	0	0	0	0	0.0497569	0.838416	0.723251	4.43627e-32	0.0364142	0.002732	0.00130575	0.750213
PAPSS2	0	0	0	0	0.049282	0.840557	0.72365	4.4259e-32	0.0364289	-0.00196976	0.00094151	0.750213
OR51A4	0	0	0	0	0.0499408	0.835974	0.720985	4.78659e-32	0.0364341	-0.00366988	0.00175419	0.750213
MARS2	0	0	0	0	0.0497274	0.833489	0.725201	4.19017e-32	0.0364361	-0.00433901	0.00207405	0.750213
MAP10	0	0	0	0	0.0488059	0.831474	0.720468	3.84897e-32	0.0365679	0.00252227	0.0012065	0.750213
DDOST	0	0	0	0	0.0501196	0.831331	0.723172	3.7455e-32	0.0365914	-0.00181367	0.000867654	0.750213
LRRC73	0	0	0	0	0.0490347	0.837964	0.726492	4.10112e-32	0.0366802	0.00642529	0.0030753	0.750213
SLC6A11	0	0	0	0	0.0498357	0.835615	0.71891	3.86583e-32	0.036695	0.00334752	0.00160233	0.750213
CLDN9	0	0	0	0	0.0494495	0.839007	0.722091	3.33003e-32	0.0367974	-0.00419762	0.00201033	0.750213
CRX	0	0	0	0	0.0498345	0.833504	0.722648	4.02682e-32	0.0368014	-0.00431769	0.00206788	0.750213
KCNJ1	0	0	0	0	0.0498206	0.839286	0.726359	4.81898e-32	0.0368714	0.00315646	0.00151229	0.750213
SFTA2	0	0	0	0	0.0482845	0.836093	0.722009	3.91805e-32	0.0369252	-0.0178219	0.00854107	0.750213
AHCYL2	0	0	0	0	0.0504933	0.833423	0.718858	4.28235e-32	0.0369723	0.00394959	0.0018933	0.750213
ADAMTS8	0	0	0	0	0.049299	0.836	0.719309	4.54659e-32	0.0370116	0.00117752	0.00056458	0.750213
GSTA3	0	0	0	0	0.048184	0.828302	0.73046	5.39773e-32	0.0370245	0.0040482	0.0019411	0.750213
FFAR1	0	0	0	0	0.0501578	0.833274	0.728699	4.10421e-32	0.0370256	0.00435806	0.00208969	0.750213
KLB	0	0	0	0	0.0493043	0.833171	0.724715	4.35684e-32	0.0370361	-0.00220561	0.00105765	0.750213
PRPF4	0	0	0	0	0.0489472	0.830488	0.722743	3.62846e-32	0.0370429	-0.00373941	0.00179321	0.750213
SYNE2	0	0	0	0	0.050956	0.838019	0.721917	3.30038e-32	0.037088	-0.000585204	0.000280699	0.750213
CTSZ	0	0	0	0	0.0506174	0.839079	0.720521	2.95787e-32	0.0371202	0.00180423	0.000865564	0.750213
FAM192A	0	0	0	0	0.0495526	0.837834	0.725437	3.86635e-32	0.0371952	-0.0076594	0.00367598	0.750213
EFNA5	0	0	0	0	0.0494821	0.840632	0.723303	4.04285e-32	0.037206	-0.0063309	0.00303857	0.750213
ERMN	0	0	0	0	0.0498971	0.839888	0.724829	5.1797e-32	0.0372119	0.00204365	0.000980897	0.750213
GPR135	0	0	0	0	0.0501574	0.834591	0.72284	4.82588e-32	0.0372172	-0.00282361	0.00135529	0.750213
PANK2	0	0	0	0	0.0503106	0.832869	0.725097	3.41744e-32	0.0372461	-0.00345608	0.00165912	0.750213
POLR2F	0	0	0	0	0.0492949	0.839802	0.719219	3.6789e-32	0.0372557	0.0038203	0.00183406	0.750213
IFT46	0	0	0	0	0.0487603	0.837454	0.726587	4.67097e-32	0.037259	0.0017938	0.000861188	0.750213
C1GALT1C1	0	0	0	0	0.0493726	0.839767	0.725914	4.39865e-32	0.0372762	0.00355305	0.00170595	0.750213
C15orf40	0	0	0	0	0.0479688	0.832588	0.721612	3.13334e-32	0.0373413	0.00645538	0.00310052	0.750709
ZNF382	0	0	0	0	0.0490459	0.833117	0.730179	4.30828e-32	0.0375175	0.00451802	0.00217201	0.753435
PCDH17	0	0	0	0	0.0500513	0.84367	0.722863	4.01268e-32	0.0375639	0.00268076	0.00128907	0.753552
MCU	0	0	0	0	0.0494923	0.835355	0.731477	4.10199e-32	0.0376476	0.00321569	0.00154698	0.753729
UFC1	0	0	0	0	0.0486239	0.83296	0.728155	3.40783e-32	0.0377058	-0.00434087	0.00208891	0.753729
CCDC122	0	0	0	0	0.0493691	0.832299	0.726958	4.80737e-32	0.037745	0.00437778	0.0021071	0.753729
RUNX1	0	0	0	0	0.0507756	0.832808	0.73257	5.56039e-32	0.0378313	-0.0035264	0.00169808	0.753729
ABCB5	0	0	0	0	0.0484472	0.838744	0.72226	3.60443e-32	0.0378494	0.00111637	0.000537619	0.753729
PLEKHJ1	0	0	0	0	0.0500835	0.837095	0.727203	4.32417e-32	0.0378509	-0.00381993	0.00183961	0.753729
SVOP	0	0	0	0	0.0510566	0.82952	0.724019	3.74758e-32	0.0378844	-0.00459595	0.00221372	0.753729
CALML5	0	0	0	0	0.0503216	0.831652	0.720176	3.50093e-32	0.0378977	-0.00473832	0.00228245	0.753729
PPP1R3F	0	0	0	0	0.0494066	0.834972	0.720538	3.98385e-32	0.0380132	-0.0050023	0.00241106	0.75382
PLPP5	0	0	0	0	0.0495792	0.839195	0.719654	4.54555e-32	0.0380308	-0.00464123	0.00223723	0.75382
ACP6	0	0	0	0	0.0504919	0.822079	0.721795	2.49615e-32	0.0380747	-0.00240718	0.00116061	0.75382
PRPF3	0	0	0	0	0.0492435	0.832881	0.729374	4.32204e-32	0.0381211	0.00524607	0.00252997	0.75382
CSDE1	0	0	0	0	0.0482481	0.82958	0.729667	3.6091e-32	0.0381429	0.0047331	0.00228284	0.75382
DOC2B	0	0	0	0	0.0490812	0.83226	0.728896	4.80113e-32	0.038146	0.00311593	0.00150288	0.75382
EPDR1	0	0	0	0	0.0484664	0.84244	0.726212	4.26505e-32	0.0383595	0.00299262	0.001445	0.754697
CCDC121	0	0	0	0	0.0488457	0.837681	0.721605	3.36579e-32	0.0384319	0.00443802	0.00214373	0.754697
FAM234B	0	0	0	0	0.0494852	0.838174	0.725704	3.73222e-32	0.0384661	-0.00276759	0.00133708	0.754697
PCLAF	0	0	0	0	0.0503963	0.832585	0.729718	3.48767e-32	0.0384762	-0.00926251	0.00447515	0.754697
CDYL	0	0	0	0	0.0504603	0.841209	0.723896	3.86512e-32	0.0385731	-0.00447763	0.00216443	0.754697
ZNF814	0	0	0	0	0.0485582	0.832644	0.724186	5.1151e-32	0.0385852	0.00259623	0.00125507	0.754697
CDK5RAP1	0	0	0	0	0.0490439	0.834639	0.726086	5.12551e-32	0.0385853	-0.00176453	0.000853008	0.754697
HTRA1	0	0	0	0	0.049856	0.835766	0.721834	4.27656e-32	0.038702	0.00256035	0.00123846	0.754697
ARHGEF17	0	0	0	0	0.0501453	0.846093	0.719461	3.05737e-32	0.0387211	-0.0010566	0.000511136	0.754697
CFAP69	0	0	0	0	0.0495995	0.838613	0.724075	4.72472e-32	0.0387605	-0.00202885	0.000981666	0.754697
ZSCAN29	0	0	0	0	0.0492049	0.845373	0.719015	3.7883e-32	0.0388076	-0.0017296	0.000837077	0.754697
PLXNA2	0	0	0	0	0.0481072	0.840327	0.726766	4.37316e-32	0.0388723	0.00110895	0.000536877	0.754697
UBXN4	0	0	0	0	0.0500698	0.837878	0.726297	4.97231e-32	0.0388883	0.00385015	0.00186413	0.754697
CCDC160	0	0	0	0	0.0480741	0.842081	0.716873	3.4777e-32	0.0389112	-0.0137655	0.00666563	0.754697
CYB5R1	0	0	0	0	0.0489028	0.837198	0.717607	3.78007e-32	0.0389276	-0.00434312	0.00210324	0.754697
FAM105A	0	0	0	0	0.0505481	0.833862	0.725505	4.38363e-32	0.0389524	-0.00421986	0.00204381	0.754697
FGF1	0	0	0	0	0.0515704	0.833311	0.719914	4.13343e-32	0.0390105	-0.00540226	0.00261725	0.754697
TMEM8A	0	0	0	0	0.0490914	0.836524	0.730837	4.40995e-32	0.0390189	0.00151772	0.000735328	0.754697
ACVR1C	0	0	0	0	0.0492917	0.833863	0.729033	3.11342e-32	0.0390469	0.00265548	0.00128675	0.754697
RNPC3	0	0	0	0	0.0485999	0.831851	0.727171	5.13659e-32	0.0390481	-0.00175738	0.00085157	0.754697
CNNM2	0	0	0	0	0.049437	0.838268	0.721694	3.88032e-32	0.0390832	0.00481423	0.00233324	0.754697
ABR	0	0	0	0	0.0484968	0.838003	0.723619	3.92075e-32	0.0390902	0.00317509	0.00153887	0.754697
SEC63	0	0	0	0	0.0488031	0.836621	0.722095	3.8529e-32	0.0392176	0.00341837	0.00165786	0.754697
RPS9	0	0	0	0	0.0495185	0.831817	0.723198	4.17461e-32	0.0392192	0.00954663	0.00463002	0.754697
MAP4K3	0	0	0	0	0.0493739	0.838781	0.731314	4.02482e-32	0.0392433	0.00155837	0.000755889	0.754697
ANGEL1	0	0	0	0	0.0504501	0.840566	0.720584	3.21408e-32	0.0393244	-0.00141724	0.000687716	0.754697
PLK2	0	0	0	0	0.04975	0.84121	0.723712	3.2339e-32	0.0394302	-0.00525975	0.00255366	0.754697
MRPS24	0	0	0	0	0.0490297	0.842311	0.720911	3.55829e-32	0.0394411	0.00294256	0.00142872	0.754697
SYNE3	0	0	0	0	0.0492262	0.832494	0.722117	4.58873e-32	0.0394517	-0.00222067	0.00107828	0.754697
RDH11	0	0	0	0	0.0496946	0.834453	0.724466	4.63496e-32	0.0394791	-0.00418489	0.00203231	0.754697
ELP1	0	0	0	0	0.0513373	0.834709	0.732543	4.33135e-32	0.0394902	0.00121192	0.000588581	0.754697
GPR6	0	0	0	0	0.0501778	0.83897	0.727837	4.11067e-32	0.0394919	0.00463165	0.00224942	0.754697
BTAF1	0	0	0	0	0.050143	0.832541	0.715335	4.82559e-32	0.0395898	0.00189031	0.00091851	0.75579
KCNG4	0	0	0	0	0.0499467	0.840132	0.731839	3.54416e-32	0.0396794	-0.00125644	0.000610784	0.756722
CDK11B	0	0	0	0	0.0503763	0.840725	0.72019	3.69008e-32	0.0398659	-0.00473991	0.00230635	0.75811
APLF	0	0	0	0	0.0499557	0.834299	0.729273	4.12555e-32	0.0399404	0.00282832	0.00137672	0.75811
MFSD1	0	0	0	0	0.0480887	0.832059	0.724344	4.48602e-32	0.0400196	0.00206499	0.00100557	0.75811
FGFBP1	0	0	0	0	0.0496454	0.837493	0.722617	4.14141e-32	0.0401558	-0.00397466	0.00193681	0.75811
SCD5	0	0	0	0	0.048431	0.834489	0.721367	3.98628e-32	0.040174	0.00352571	0.0017182	0.75811
NDUFV3	0	0	0	0	0.0490737	0.836491	0.724741	2.80538e-32	0.0401905	0.0016654	0.000811677	0.75811
DUS4L	0	0	0	0	0.049361	0.839186	0.725452	3.76881e-32	0.0401984	-0.00468643	0.00228415	0.75811
ARMCX1	0	0	0	0	0.0492024	0.832983	0.719834	3.51047e-32	0.0402249	0.0105778	0.00515626	0.75811
TDRP	0	0	0	0	0.0502562	0.835485	0.713314	4.61822e-32	0.0402649	0.00392668	0.00191448	0.75811
KRBOX1	0	0	0	0	0.0497821	0.836818	0.725884	3.74026e-32	0.0403397	-0.00911825	0.00444734	0.75811
PPP2CA	0	0	0	0	0.050184	0.839899	0.724596	3.89776e-32	0.040343	-0.018128	0.00884191	0.75811
CFAP52	0	0	0	0	0.049929	0.826222	0.728146	4.53367e-32	0.0403465	0.00147626	0.000720055	0.75811
CAMTA1	0	0	0	0	0.0496558	0.83324	0.7206	4.30175e-32	0.0403766	-0.00170422	0.000831371	0.75811
SYCP1	0	0	0	0	0.049675	0.833675	0.732117	5.31703e-32	0.040401	-0.00140004	0.000683064	0.75811
MPV17L2	0	0	0	0	0.049743	0.836556	0.721654	3.79957e-32	0.0404387	-0.00812422	0.00396447	0.75811
ASIC4	0	0	0	0	0.0501496	0.833722	0.722149	4.09781e-32	0.0404472	-0.00181229	0.000884402	0.75811
LYPD8	0	0	0	0	0.0491897	0.839902	0.719378	3.80079e-32	0.0405528	-0.0123213	0.006016	0.75811
MS4A4E	0	0	0	0	0.0501948	0.835557	0.725797	3.93971e-32	0.040564	-0.0410795	0.0200585	0.75811
DSEL	0	0	0	0	0.0501307	0.834584	0.729585	4.24633e-32	0.0405877	0.0018061	0.000881999	0.75811
HIST1H2BK	0	0	0	0	0.0514421	0.830712	0.723328	3.82665e-32	0.0405985	-0.010248	0.00500484	0.75811
PHIP	0	0	0	0	0.048818	0.836153	0.729847	3.72039e-32	0.0406216	-0.00338047	0.00165111	0.75811
LOXL1	0	0	0	0	0.0499187	0.840668	0.721711	6.23142e-32	0.040651	-0.00196686	0.000960806	0.75811
LRRC10B	0	0	0	0	0.0496116	0.838342	0.727575	4.54863e-32	0.0408642	-0.00257496	0.0012592	0.760826
ARL15	0	0	0	0	0.0495512	0.833796	0.719164	4.63505e-32	0.0409561	-0.00437802	0.0021419	0.760826
FBXO34	0	0	0	0	0.049372	0.830559	0.716929	4.10334e-32	0.0409579	-0.00431475	0.00211096	0.760826
MRPS17	0	0	0	0	0.0484291	0.833425	0.726102	3.74775e-32	0.0409606	0.00760368	0.0037201	0.760826
KRTAP4-11	0	0	0	0	0.0484089	0.829716	0.725809	4.95365e-32	0.0411667	0.00338784	0.00165919	0.762664
PRIMPOL	0	0	0	0	0.0494	0.837409	0.720145	3.57664e-32	0.0412411	0.00245832	0.0012044	0.762664
ADIPOR1	0	0	0	0	0.0499631	0.832553	0.724162	4.23637e-32	0.0412834	-0.00755102	0.00370023	0.762664
FDX1	0	0	0	0	0.0486397	0.835174	0.731245	4.44608e-32	0.0412959	0.00677211	0.00331874	0.762664
PRKACG	0	0	0	0	0.0489591	0.829669	0.722963	3.97575e-32	0.0413124	-0.00528484	0.0025901	0.762664
SLC39A4	0	0	0	0	0.0488731	0.839557	0.723883	4.01299e-32	0.0413841	0.00208649	0.00102295	0.762664
KLHDC9	0	0	0	0	0.0499902	0.835192	0.723167	3.35958e-32	0.0414174	0.00235131	0.00115297	0.762664
IFIT3	0	0	0	0	0.0486808	0.840881	0.720905	5.22726e-32	0.0415572	-0.00279622	0.00137208	0.762664
USP17L2	0	0	0	0	0.0493765	0.832818	0.727463	4.00903e-32	0.0415604	0.00263595	0.00129345	0.762664
DDX51	0	0	0	0	0.051156	0.839618	0.726848	3.99331e-32	0.0415694	-0.00192216	0.00094324	0.762664
C19orf84	0	0	0	0	0.0491381	0.837381	0.722062	4.03899e-32	0.0415722	0.0110046	0.00540027	0.762664
ZNF639	0	0	0	0	0.0488042	0.828697	0.731128	4.32282e-32	0.0416411	0.00463542	0.00227549	0.762664
TMEM159	0	0	0	0	0.0494402	0.837598	0.725263	4.08545e-32	0.0416518	-0.00816019	0.00400598	0.762664
KRTAP7-1	0	0	0	0	0.0490907	0.83731	0.717561	4.35219e-32	0.041741	0.0251707	0.0123622	0.762664
LACTB2	0	0	0	0	0.0500059	0.830125	0.730368	4.13514e-32	0.0418694	0.0039589	0.00194557	0.762664
CCDC190	0	0	0	0	0.0494197	0.844776	0.719843	5.93533e-32	0.0419419	-0.00259554	0.00127601	0.762664
PDIA2	0	0	0	0	0.0493625	0.83731	0.724775	3.67599e-32	0.0419528	0.00166762	0.000819867	0.762664
VTA1	0	0	0	0	0.0481332	0.834434	0.723868	3.28547e-32	0.0419574	0.00238049	0.00117037	0.762664
INPPL1	0	0	0	0	0.0497894	0.836645	0.728689	3.92189e-32	0.0419723	-0.00181138	0.000890631	0.762664
CFAP221	0	0	0	0	0.0486082	0.841156	0.723617	3.51322e-32	0.0420077	-0.00241609	0.00118817	0.762664
CCDC179	0	0	0	0	0.049715	0.830261	0.724146	4.60106e-32	0.0420974	-0.00645151	0.00317406	0.762664
MT1G	0	0	0	0	0.0495783	0.833171	0.732382	4.55177e-32	0.0421405	0.0117419	0.00577805	0.762664
FCGRT	0	0	0	0	0.0493553	0.839265	0.725994	3.06755e-32	0.0421901	0.00196486	0.000967119	0.762664
CR2	0	0	0	0	0.0497511	0.832381	0.726827	2.85087e-32	0.0422775	-0.00132175	0.000650851	0.762664
GRXCR2	0	0	0	0	0.0503599	0.828826	0.723892	3.93127e-32	0.0422877	-0.00286681	0.00141174	0.762664
SLC4A4	0	0	0	0	0.0499292	0.836198	0.7134	3.85624e-32	0.0423741	0.00162102	0.000798594	0.762664
LILRA6	0	0	0	0	0.0504806	0.839759	0.720623	3.89674e-32	0.0424156	-0.00410958	0.00202498	0.762664
AP5Z1	0	0	0	0	0.0505297	0.832386	0.720308	4.56597e-32	0.0424441	-0.00112937	0.000556573	0.762664
CCDC106	0	0	0	0	0.0510542	0.832626	0.725442	4.0223e-32	0.0424442	0.00343594	0.00169329	0.762664
AP5M1	0	0	0	0	0.049567	0.838067	0.728516	4.40815e-32	0.0424584	0.0029962	0.00147668	0.762664
UMOD	0	0	0	0	0.0499987	0.841558	0.722738	3.95846e-32	0.0424802	-0.0024406	0.00120298	0.762664
ANAPC15	0	0	0	0	0.0489943	0.840242	0.727586	4.02587e-32	0.0424817	0.00895925	0.00441606	0.762664
DDIT4L	0	0	0	0	0.0491521	0.835658	0.717291	4.33612e-32	0.0425238	0.00208704	0.00102892	0.762664
GLB1L2	0	0	0	0	0.0499025	0.838779	0.730204	3.65279e-32	0.0425805	-0.00291456	0.00143729	0.762664
ZNF26	0	0	0	0	0.0499485	0.831304	0.727332	3.91147e-32	0.0426125	0.00629065	0.00310266	0.762664
RNF113A	0	0	0	0	0.0490963	0.83249	0.730315	3.92097e-32	0.0426198	-0.00476844	0.00235196	0.762664
CC2D2A	0	0	0	0	0.049476	0.843111	0.713873	4.07763e-32	0.0426288	0.00113165	0.000558191	0.762664
KBTBD12	0	0	0	0	0.0491283	0.843862	0.726279	4.07692e-32	0.0426307	0.00184414	0.000909642	0.762664
CYP51A1	0	0	0	0	0.0498159	0.840932	0.725439	4.0959e-32	0.0426625	-0.00320763	0.00158244	0.762664
ZNF710	0	0	0	0	0.0502139	0.836471	0.727062	3.84883e-32	0.0428309	-0.00411406	0.00203126	0.764412
OSBP	0	0	0	0	0.0488115	0.836849	0.722565	3.64872e-32	0.0428427	0.0031157	0.00153842	0.764412
ARHGAP5	0	0	0	0	0.0503058	0.836597	0.721784	4.1652e-32	0.0430362	0.00145995	0.000721543	0.765666
SKOR2	0	0	0	0	0.0493897	0.841386	0.719126	3.48612e-32	0.0430684	-0.00198222	0.000979812	0.765666
RAB23	0	0	0	0	0.0491977	0.830812	0.721947	3.35246e-32	0.043074	-0.00182855	0.000903876	0.765666
CST9	0	0	0	0	0.048454	0.84423	0.731112	3.65474e-32	0.043078	0.00492217	0.00243314	0.765666
FBXO36	0	0	0	0	0.0497603	0.831455	0.725412	4.70077e-32	0.043246	0.00178423	0.000882696	0.766544
UGT8	0	0	0	0	0.0494934	0.835671	0.72717	4.61683e-32	0.0432588	-0.0044354	0.00219442	0.766544
KRT23	0	0	0	0	0.0489068	0.827052	0.723392	3.81357e-32	0.0432718	0.00290682	0.00143824	0.766544
SIRPA	0	0	0	0	0.0500365	0.835688	0.723374	3.79537e-32	0.0433836	0.00269142	0.00133238	0.766544
ENDOV	0	0	0	0	0.0489366	0.839883	0.722324	4.0751e-32	0.0433882	0.00247717	0.00122634	0.766544
TP53BP2	0	0	0	0	0.0495706	0.834206	0.724744	4.46155e-32	0.0435	0.00210684	0.00104356	0.766544
CCDC28B	0	0	0	0	0.0480639	0.838448	0.725795	5.26664e-32	0.0435061	0.00212437	0.00105227	0.766544
ADGRG7	0	0	0	0	0.0503428	0.833757	0.722979	5.08285e-32	0.043517	0.00185744	0.000920102	0.766544
DLD	0	0	0	0	0.0495039	0.839856	0.724193	3.64031e-32	0.0435409	0.00292668	0.00144993	0.766544
KCNK18	0	0	0	0	0.0508078	0.830955	0.718075	2.90771e-32	0.0435886	-0.00168098	0.000832977	0.766544
ANP32D	0	0	0	0	0.0496836	0.838601	0.721935	3.76274e-32	0.0436212	-0.00417965	0.00207146	0.766544
2001-09-01	0	0	0	0	0.0488889	0.837862	0.725541	4.11569e-32	0.0436816	0.00124976	0.000619567	0.766544
ZNHIT3	0	0	0	0	0.0502909	0.828199	0.725845	4.06213e-32	0.0437011	0.00570183	0.00282693	0.766544
PML	0	0	0	0	0.0482427	0.836309	0.724609	5.06944e-32	0.043707	0.00294051	0.00145793	0.766544
SRFBP1	0	0	0	0	0.0487127	0.836378	0.719399	4.19895e-32	0.0438047	-0.00279215	0.00138501	0.766544
XPO1	0	0	0	0	0.0495993	0.835077	0.722984	4.34278e-32	0.0438195	0.00677576	0.00336127	0.766544
SCML4	0	0	0	0	0.0494086	0.839304	0.722554	4.5662e-32	0.0438296	0.00220626	0.00109452	0.766544
PGR	0	0	0	0	0.0497381	0.835986	0.735104	4.44001e-32	0.0439438	-0.00289827	0.0014386	0.767816
NLRC4	0	0	0	0	0.0498746	0.829867	0.71765	3.88383e-32	0.0441562	-0.00263791	0.00131068	0.770438
HIGD1B	0	0	0	0	0.0493145	0.831257	0.724089	4.08237e-32	0.0441768	0.0081027	0.00402633	0.770438
SUN1	0	0	0	0	0.0495376	0.847506	0.73372	3.81192e-32	0.0443007	-0.00171342	0.000851919	0.771873
TMEM251	0	0	0	0	0.0498169	0.829682	0.726304	3.25202e-32	0.0443502	-0.00366859	0.00182446	0.77201
SDHAF2	0	0	0	0	0.0497296	0.833464	0.731053	4.44277e-32	0.0445044	-0.00678254	0.00337553	0.773137
MTMR6	0	0	0	0	0.0494918	0.831082	0.725902	4.8708e-32	0.0445304	0.00287841	0.0014327	0.773137
SLC47A1	0	0	0	0	0.048531	0.834229	0.730522	4.24204e-32	0.0446992	0.0019549	0.000973803	0.773137
LMNB1	0	0	0	0	0.0488373	0.829915	0.728462	3.59456e-32	0.0447577	-0.00287459	0.00143232	0.773137
ISOC1	0	0	0	0	0.0499456	0.834935	0.723671	3.76356e-32	0.0447886	-0.00385107	0.00191915	0.773137
OTOF	0	0	0	0	0.049915	0.834773	0.716977	3.18022e-32	0.0448075	-0.000714085	0.00035589	0.773137
MYBPC1	0	0	0	0	0.0492087	0.836118	0.722616	5.13078e-32	0.0448093	0.00206816	0.00103075	0.773137
NFKB2	0	0	0	0	0.0500678	0.831216	0.724486	4.29782e-32	0.0448915	-0.00296619	0.00147889	0.773137
DYNC1H1	0	0	0	0	0.0502567	0.834202	0.724074	4.142e-32	0.0448978	0.0015966	0.000796058	0.773137
PSG6	0	0	0	0	0.0480517	0.834354	0.722268	3.57928e-32	0.0449052	0.00423527	0.00211177	0.773137
HMGCLL1	0	0	0	0	0.0498218	0.832686	0.727475	4.60036e-32	0.0449157	0.00257457	0.00128378	0.773137
ZNF667	0	0	0	0	0.0497891	0.833099	0.713428	3.51906e-32	0.0450472	-0.0025247	0.00125969	0.773137
PLEKHN1	0	0	0	0	0.049622	0.831903	0.72527	3.47821e-32	0.0450566	-0.00197646	0.000986187	0.773137
XKR7	0	0	0	0	0.0492181	0.837512	0.731674	4.59474e-32	0.0450677	0.0029621	0.00147807	0.773137
INPP5E	0	0	0	0	0.0492076	0.837697	0.716006	3.58439e-32	0.0451403	0.00261678	0.00130619	0.773137
PEG3	0	0	0	0	0.0496269	0.843149	0.719775	3.3068e-32	0.0451976	0.00125501	0.000626621	0.773137
ZCWPW1	0	0	0	0	0.0492265	0.841644	0.735767	3.14265e-32	0.0452239	-0.00191143	0.000954481	0.773137
SLC26A4	0	0	0	0	0.0483342	0.837773	0.722768	4.15113e-32	0.0452254	0.000976736	0.000487741	0.773137
MECR	0	0	0	0	0.048286	0.840303	0.722622	4.31215e-32	0.0452466	0.00180635	0.000902107	0.773137
NDUFB3	0	0	0	0	0.0485359	0.846062	0.72626	4.46647e-32	0.0452555	-0.00248266	0.00123991	0.773137
TMEM47	0	0	0	0	0.0482586	0.84285	0.718559	4.12353e-32	0.0453171	0.0204334	0.0102079	0.773137
HFM1	0	0	0	0	0.0496394	0.826135	0.729617	4.61069e-32	0.0454041	0.00156624	0.000782764	0.773137
SYT11	0	0	0	0	0.0483243	0.83478	0.73073	4.298e-32	0.0454336	0.00490678	0.00245261	0.773137
RTN1	0	0	0	0	0.0481057	0.834556	0.727843	4.48493e-32	0.0454723	0.00257409	0.00128687	0.773137
GAB2	0	0	0	0	0.0490521	0.82829	0.720993	3.98079e-32	0.0454757	-0.00224385	0.00112179	0.773137
PHPT1	0	0	0	0	0.0488848	0.835955	0.722042	3.80445e-32	0.0454982	-0.00635626	0.00317807	0.773137
ADAMTS1	0	0	0	0	0.0493865	0.837003	0.717686	3.07635e-32	0.0455508	0.000931592	0.000465901	0.773322
TDRKH	0	0	0	0	0.0512332	0.833322	0.726233	4.63659e-32	0.0456169	0.00170277	0.000851836	0.773332
C9orf116	0	0	0	0	0.0497441	0.834814	0.729067	4.91318e-32	0.0456749	0.00801673	0.00401157	0.773332
RTN4RL2	0	0	0	0	0.0488218	0.837991	0.728581	4.55486e-32	0.0456935	-0.00230085	0.00115145	0.773332
PPP1R42	0	0	0	0	0.0486624	0.837081	0.721954	3.31086e-32	0.0457181	-0.00593958	0.00297276	0.773332
CCNF	0	0	0	0	0.0498623	0.834664	0.71968	4.01612e-32	0.0457672	0.00240776	0.00120536	0.773457
TSHR	0	0	0	0	0.0501679	0.833599	0.728339	4.14586e-32	0.0458219	-0.00199814	0.00100055	0.773677
UNC5B	0	0	0	0	0.0493099	0.842015	0.716451	4.00122e-32	0.0459203	-0.00146846	0.000735651	0.773946
GCDH	0	0	0	0	0.0496284	0.837665	0.726304	3.63353e-32	0.0459212	-0.00250727	0.00125607	0.773946
NLGN3	0	0	0	0	0.0490277	0.834203	0.729514	4.09433e-32	0.0459949	0.00735621	0.00368648	0.774199
SPATA2	0	0	0	0	0.0487389	0.836868	0.712943	3.27002e-32	0.046209	-0.001851	0.000928521	0.774199
GAL3ST1	0	0	0	0	0.0490719	0.842003	0.726657	3.91075e-32	0.0462495	-0.00304905	0.00152978	0.774199
MAGEL2	0	0	0	0	0.049408	0.835813	0.719817	3.31503e-32	0.0462572	-0.00335532	0.00168351	0.774199
RTL5	0	0	0	0	0.0498571	0.835012	0.721162	4.47323e-32	0.0462692	0.00582648	0.00292355	0.774199
TMEM253	0	0	0	0	0.0492169	0.84007	0.717426	4.20422e-32	0.046394	0.00279009	0.00140078	0.774199
SLK	0	0	0	0	0.0500414	0.830756	0.725855	3.79906e-32	0.0464047	0.00160947	0.000808083	0.774199
AFF3	0	0	0	0	0.0501994	0.844218	0.728952	3.82566e-32	0.0464653	-0.00231138	0.00116082	0.774199
ATXN7L3B	0	0	0	0	0.0491214	0.827217	0.724244	3.87519e-32	0.0464931	0.00983475	0.00493984	0.774199
ALK	0	0	0	0	0.0491402	0.831045	0.716059	3.42683e-32	0.0465959	-0.00163004	0.000819128	0.774199
RNF2	0	0	0	0	0.0501912	0.837395	0.721655	3.618e-32	0.0466332	-0.0121522	0.00610776	0.774199
DOPEY1	0	0	0	0	0.0498349	0.842237	0.72646	4.08556e-32	0.046702	-0.00192811	0.00096938	0.774199
GCNT4	0	0	0	0	0.0486919	0.82718	0.716682	3.50365e-32	0.0467161	-0.00227707	0.0011449	0.774199
LMOD3	0	0	0	0	0.0494593	0.839152	0.725555	4.0904e-32	0.046724	-0.00231346	0.00116324	0.774199
ERO1B	0	0	0	0	0.050628	0.829292	0.724247	3.72333e-32	0.0467379	-0.00255976	0.00128716	0.774199
CSAD	0	0	0	0	0.049284	0.836571	0.725993	4.11009e-32	0.0467854	-0.00155738	0.00078329	0.774199
ACSS2	0	0	0	0	0.0503595	0.837372	0.729675	5.10062e-32	0.0468074	0.00161544	0.000812573	0.774199
HIST1H4B	0	0	0	0	0.0494994	0.837134	0.727822	3.69885e-32	0.0468248	-0.00389385	0.00195878	0.774199
THADA	0	0	0	0	0.0488872	0.838517	0.725568	5.47313e-32	0.0468372	0.000909946	0.000457768	0.774199
RPL11	0	0	0	0	0.0494807	0.844208	0.718869	4.11823e-32	0.0468489	0.0111104	0.00558964	0.774199
FCRL6	0	0	0	0	0.0491957	0.835686	0.725672	3.83613e-32	0.0469008	0.0022615	0.00113803	0.774199
LRRK2	0	0	0	0	0.0495664	0.840715	0.720221	3.3935e-32	0.0469174	0.00118505	0.000596383	0.774199
SPTLC3	0	0	0	0	0.049068	0.837775	0.725618	3.49138e-32	0.0469185	-0.00289746	0.00145817	0.774199
FOXK1	0	0	0	0	0.0490675	0.837993	0.721332	2.93201e-32	0.0469463	-0.00212417	0.00106914	0.774199
SYT12	0	0	0	0	0.0492485	0.836228	0.724547	4.12482e-32	0.0470346	0.00282875	0.00142434	0.774199
RNASE12	0	0	0	0	0.0488573	0.831285	0.724232	3.48956e-32	0.047095	-0.00407976	0.00205482	0.774199
NAA38	0	0	0	0	0.0488637	0.831749	0.723234	3.13369e-32	0.0472104	-0.00329487	0.00166036	0.774199
BTN2A2	0	0	0	0	0.0494231	0.832772	0.722571	3.62163e-32	0.0472772	0.00146559	0.000738769	0.774199
CNOT11	0	0	0	0	0.0490715	0.829255	0.721375	3.66906e-32	0.0472862	-0.00383745	0.00193445	0.774199
C21orf33	0	0	0	0	0.0498862	0.835474	0.721869	4.9946e-32	0.0473056	-0.0714014	0.0359964	0.774199
ZC3H13	0	0	0	0	0.0496307	0.834812	0.719999	4.65265e-32	0.0473403	0.00142259	0.0007173	0.774199
ESR2	0	0	0	0	0.0502034	0.832724	0.731997	3.32389e-32	0.047341	-0.00183238	0.000923928	0.774199
AADACL3	0	0	0	0	0.0492447	0.836506	0.719831	2.83917e-32	0.0474187	0.00232461	0.00117253	0.774199
TGFB1I1	0	0	0	0	0.0504418	0.842334	0.720298	4.56406e-32	0.0474473	-0.00241478	0.00121817	0.774199
XAGE3	0	0	0	0	0.0486908	0.836408	0.722376	3.71652e-32	0.0475204	-0.025334	0.0127843	0.774199
SLC7A14	0	0	0	0	0.0505566	0.838792	0.724318	4.40428e-32	0.0475213	0.00166462	0.000840019	0.774199
SLC5A6	0	0	0	0	0.0485921	0.838559	0.723197	2.82612e-32	0.0475624	-0.00296439	0.0014962	0.774199
SEC31A	0	0	0	0	0.0502717	0.836103	0.725607	4.42193e-32	0.0475911	0.00242655	0.0012249	0.774199
YWHAZ	0	0	0	0	0.0488653	0.832905	0.719417	3.27628e-32	0.0475977	-0.0191189	0.00965134	0.774199
TDG	0	0	0	0	0.0489368	0.837092	0.721865	3.70829e-32	0.0476051	0.0041238	0.00208179	0.774199
NCLN	0	0	0	0	0.0494268	0.841184	0.724936	3.17259e-32	0.047685	0.00346095	0.0017478	0.774819
SNPH	0	0	0	0	0.0497643	0.839227	0.725267	3.8198e-32	0.0477791	0.0030443	0.00153803	0.775668
PLA2G4D	0	0	0	0	0.049691	0.829308	0.716826	3.38805e-32	0.0479792	-0.00140133	0.000708614	0.777001
KRT77	0	0	0	0	0.049263	0.839831	0.717646	4.18851e-32	0.0480265	0.0038753	0.00196004	0.777001
DVL2	0	0	0	0	0.0494374	0.835575	0.72856	4.50802e-32	0.048035	0.00234204	0.0011846	0.777001
INPP5B	0	0	0	0	0.0480864	0.838509	0.716427	3.49129e-32	0.0480644	0.00187728	0.000949648	0.777001
IL16	0	0	0	0	0.0493488	0.83851	0.725769	3.7024e-32	0.0480705	0.00198551	0.00100442	0.777001
PAFAH1B2	0	0	0	0	0.0505082	0.835291	0.720075	4.18059e-32	0.0482897	0.00718852	0.00364008	0.778667
APOBEC4	0	0	0	0	0.0499307	0.833947	0.724493	3.41244e-32	0.0484823	-0.00518329	0.00262693	0.778667
ETS2	0	0	0	0	0.049075	0.834267	0.721496	3.49029e-32	0.0485276	0.00310326	0.00157308	0.778667
WFDC9	0	0	0	0	0.0492192	0.832871	0.721679	5.43535e-32	0.0486154	0.00576388	0.00292291	0.778667
S100A7L2	0	0	0	0	0.0489249	0.840336	0.724061	4.0277e-32	0.0486665	-0.0131372	0.00666351	0.778667
GATA4	0	0	0	0	0.0491862	0.831409	0.713431	3.57767e-32	0.048698	0.0034322	0.00174114	0.778667
GUCY1B3	0	0	0	0	0.04922	0.831295	0.723729	3.83911e-32	0.0487293	0.003595	0.00182398	0.778667
MRPL32	0	0	0	0	0.0492703	0.834988	0.728186	4.2642e-32	0.0487457	-0.00104636	0.000530923	0.778667
FABP7	0	0	0	0	0.0495348	0.839414	0.725906	4.37866e-32	0.04879	0.00438398	0.00222488	0.778667
ADK	0	0	0	0	0.0492892	0.83716	0.720298	3.79657e-32	0.0488546	-0.00434063	0.00220351	0.778667
SNX6	0	0	0	0	0.0510072	0.831261	0.727149	3.74798e-32	0.0488727	0.00460039	0.00233556	0.778667
JAK3	0	0	0	0	0.0497905	0.836257	0.728434	3.75044e-32	0.0488853	-0.00199938	0.00101512	0.778667
OSGEP	0	0	0	0	0.0508449	0.837772	0.728444	3.8939e-32	0.0489042	-0.00250032	0.00126956	0.778667
LYST	0	0	0	0	0.0491802	0.83189	0.721699	3.75784e-32	0.0489381	-0.000941396	0.000478073	0.778667
GATAD2A	0	0	0	0	0.0507329	0.839007	0.728206	5.27996e-32	0.048965	-0.00260671	0.00132393	0.778667
ANXA2R	0	0	0	0	0.0495393	0.834495	0.725759	3.7416e-32	0.0490241	0.00595903	0.00302735	0.778667
ENO2	0	0	0	0	0.0500718	0.841566	0.729335	3.58704e-32	0.049052	0.0026151	0.00132871	0.778667
ANHX	0	0	0	0	0.0498068	0.836906	0.723792	4.42755e-32	0.0490961	-0.00230691	0.00117235	0.778667
TLE1	0	0	0	0	0.0496526	0.837555	0.723804	5.61293e-32	0.0491516	-0.00156685	0.000796449	0.778667
SDR42E1	0	0	0	0	0.0490385	0.836225	0.721863	3.95804e-32	0.0491622	-0.00245612	0.00124854	0.778667
GRM5	0	0	0	0	0.0492116	0.832731	0.718397	4.16223e-32	0.0491657	0.0024446	0.0012427	0.778667
ZNF331	0	0	0	0	0.0502462	0.840224	0.727981	3.77686e-32	0.0491935	-0.00521652	0.00265212	0.778667
ENDOU	0	0	0	0	0.0493557	0.835551	0.722975	3.76156e-32	0.0492131	0.0013695	0.000696323	0.778667
IQCC	0	0	0	0	0.0497758	0.838999	0.72246	6.2353e-32	0.0492216	-0.00133101	0.000676778	0.778667
SLC41A3	0	0	0	0	0.0499632	0.835435	0.726777	4.4893e-32	0.0492588	0.00221628	0.00112709	0.778667
FXYD3	0	0	0	0	0.0499968	0.831738	0.722366	4.06792e-32	0.0492647	0.00205063	0.00104288	0.778667
CYP4A11	0	0	0	0	0.0499684	0.842056	0.722169	5.1111e-32	0.0493848	-0.00191047	0.000972118	0.779902
PRR14L	0	0	0	0	0.0499122	0.832592	0.727044	3.85228e-32	0.0494554	-0.0018694	0.000951513	0.780353
DKC1	0	0	0	0	0.049559	0.839178	0.725414	4.30733e-32	0.0495304	-0.0121021	0.00616194	0.780872
GAGE1	0	0	0	0	0.0504767	0.83758	0.720183	3.87194e-32	0.0496179	0.0142505	0.00725859	0.781587
AKR1C4	0	0	0	0	0.0503789	0.827387	0.716452	4.28772e-32	0.049677	0.0031517	0.00160576	0.781807
CCDC57	0	0	0	0	0.0479824	0.835862	0.721354	4.28708e-32	0.0497899	-0.00187799	0.000957286	0.781807
ATP1B2	0	0	0	0	0.0496862	0.838082	0.725263	3.77249e-32	0.0497988	-0.00408282	0.00208126	0.781807
C11orf65	0	0	0	0	0.049951	0.834025	0.717431	3.7376e-32	0.0498246	0.00102486	0.000522493	0.781807
LDHA	0	0	0	0	0.0505523	0.836198	0.725723	4.53743e-32	0.0498425	0.00249562	0.00127241	0.781807
GPR17	0	0	0	0	0.0492129	0.842015	0.733192	5.36266e-32	0.049961	0.0016387	0.000835937	0.782509
IDI2	0	0	0	0	0.0500654	0.833541	0.728197	3.32408e-32	0.0499716	0.00528449	0.00269586	0.782509
ESR1	0	0	0	0	0.0498154	0.837545	0.721326	4.30905e-32	0.0500663	0.00147511	0.000752831	0.783064
ESCO1	0	0	0	0	0.0490219	0.838237	0.722692	3.54034e-32	0.0501297	-0.00261982	0.00133741	0.783064
TSPAN32	0	0	0	0	0.0500754	0.835154	0.725886	3.94471e-32	0.0501337	0.00167832	0.000856793	0.783064
HOXD11	0	0	0	0	0.048445	0.834575	0.72453	3.10591e-32	0.050238	0.00397872	0.00203209	0.784035
AGPAT5	0	0	0	0	0.0484636	0.833791	0.729696	3.96645e-32	0.0503328	0.00399963	0.00204361	0.784075
GTF2E2	0	0	0	0	0.0492531	0.840135	0.72515	4.67015e-32	0.0503648	0.00216798	0.00110788	0.784075
IQCB1	0	0	0	0	0.0494054	0.83292	0.729838	3.6228e-32	0.0503674	-0.00159078	0.000812929	0.784075
PHKB	0	0	0	0	0.0493583	0.835562	0.727373	3.17293e-32	0.050509	-0.000808647	0.000413494	0.78562
OR7D2	0	0	0	0	0.0492466	0.834141	0.720318	3.61196e-32	0.0505938	-0.00461787	0.00236217	0.78628
MRPL49	0	0	0	0	0.0497717	0.834603	0.715662	3.65736e-32	0.0506561	-0.00489003	0.00250207	0.78659
ZIC1	0	0	0	0	0.0492781	0.835016	0.731181	3.18577e-32	0.0509465	-0.0040738	0.00208704	0.787139
FER1L5	0	0	0	0	0.0503081	0.83536	0.719884	4.47735e-32	0.0510674	-0.00321251	0.00164665	0.787139
PRDX3	0	0	0	0	0.0488765	0.837493	0.725367	3.86851e-32	0.0510756	0.00121205	0.00062129	0.787139
MTCL1	0	0	0	0	0.0504287	0.831068	0.712537	3.5273e-32	0.0511141	-0.00117057	0.000600126	0.787139
LARGE1	0	0	0	0	0.0500178	0.845237	0.721301	4.66741e-32	0.0511744	-0.00196953	0.00101	0.787139
IFITM5	0	0	0	0	0.0495315	0.831421	0.731102	4.66744e-32	0.0512756	0.0039494	0.00202618	0.787139
SUGCT	0	0	0	0	0.0490028	0.841583	0.727431	4.04258e-32	0.0512758	0.00131318	0.000673706	0.787139
SERPINE3	0	0	0	0	0.0491266	0.838805	0.734828	4.75592e-32	0.0513324	-0.00483322	0.00248022	0.787139
PWWP2B	0	0	0	0	0.0500862	0.836974	0.721511	4.50742e-32	0.0513544	-0.00231444	0.00118779	0.787139
DUS2	0	0	0	0	0.0502844	0.831889	0.733863	5.20159e-32	0.0513663	0.0017958	0.00092167	0.787139
B4GALT2	0	0	0	0	0.0500855	0.828473	0.721996	3.70582e-32	0.0513743	-0.00274756	0.00141019	0.787139
PPP1R1B	0	0	0	0	0.0488005	0.839284	0.725046	3.48365e-32	0.051392	-0.00459996	0.00236113	0.787139
SAXO2	0	0	0	0	0.04871	0.825438	0.722288	3.93688e-32	0.0515047	0.00434736	0.00223255	0.787139
UCKL1	0	0	0	0	0.0495286	0.844084	0.720925	4.14331e-32	0.051529	0.0029733	0.00152707	0.787139
PDCD6IP	0	0	0	0	0.0503863	0.826936	0.722442	3.85481e-32	0.0515375	-0.0029704	0.00152564	0.787139
GNA13	0	0	0	0	0.0493434	0.832585	0.722364	3.32887e-32	0.0515419	-0.00239538	0.00123032	0.787139
OR2B6	0	0	0	0	0.0498737	0.835852	0.725549	3.54761e-32	0.0515663	-0.00578699	0.00297264	0.787139
DPY19L3	0	0	0	0	0.0497361	0.829316	0.724032	3.46642e-32	0.0516171	-0.00276051	0.00141832	0.787139
TAS2R7	0	0	0	0	0.0492061	0.835284	0.731128	4.65621e-32	0.0516347	0.00290828	0.00149435	0.787139
MMP7	0	0	0	0	0.0494766	0.832277	0.723908	4.30838e-32	0.0517228	0.00523871	0.0026928	0.787139
INTS4	0	0	0	0	0.04862	0.841072	0.718389	3.66342e-32	0.0517258	-0.00181718	0.000934079	0.787139
SPATA9	0	0	0	0	0.0500403	0.836383	0.724826	4.05179e-32	0.0517527	0.00600145	0.00308526	0.787139
STK35	0	0	0	0	0.049062	0.841835	0.724838	3.62432e-32	0.0518282	-0.00359471	0.00184858	0.787139
CCND1	0	0	0	0	0.0501563	0.827085	0.728088	4.38254e-32	0.0518405	-0.00584124	0.00300402	0.787139
C20orf173	0	0	0	0	0.0487796	0.834367	0.720627	3.66276e-32	0.0519062	-0.0133403	0.00686255	0.787139
DZIP1L	0	0	0	0	0.0493565	0.839324	0.72781	3.80906e-32	0.0519317	-0.00210436	0.00108265	0.787139
ANKZF1	0	0	0	0	0.0485837	0.842915	0.72845	3.62249e-32	0.0519704	-0.00109919	0.000565604	0.787139
NFATC2	0	0	0	0	0.0491468	0.83626	0.726953	3.41711e-32	0.0520693	-0.00271657	0.00139844	0.787139
GSTM3	0	0	0	0	0.0496304	0.835172	0.735501	4.5489e-32	0.0520801	0.00344211	0.00177201	0.787139
ARHGEF7	0	0	0	0	0.0488778	0.832889	0.727178	4.32986e-32	0.0521575	-0.0013638	0.000702322	0.787139
SALL4	0	0	0	0	0.0505702	0.838337	0.719229	2.92704e-32	0.0522662	0.0020267	0.00104418	0.787139
PCMTD1	0	0	0	0	0.0494769	0.839437	0.724409	4.09402e-32	0.0523296	-0.00955277	0.00492302	0.787139
KRT83	0	0	0	0	0.049075	0.836904	0.722093	5.30546e-32	0.0523559	-0.00177512	0.000914911	0.787139
BARX1	0	0	0	0	0.0491278	0.838666	0.717285	4.82755e-32	0.0523986	-0.00293387	0.00151241	0.787139
GH1	0	0	0	0	0.0499636	0.8375	0.724204	3.59723e-32	0.0524286	0.00414154	0.00213524	0.787139
YPEL1	0	0	0	0	0.0493809	0.835603	0.721934	3.48916e-32	0.0524793	0.00607242	0.00313141	0.787139
INPP5K	0	0	0	0	0.0495863	0.841469	0.722451	3.47068e-32	0.0526423	-0.0028361	0.00146352	0.787139
PRR13	0	0	0	0	0.0486724	0.838948	0.724821	3.80596e-32	0.0526438	0.00731938	0.00377707	0.787139
POLR2E	0	0	0	0	0.0509396	0.838023	0.726324	4.18324e-32	0.0526454	0.00298225	0.00153896	0.787139
IGIP	0	0	0	0	0.0503756	0.834338	0.728335	4.90292e-32	0.0526637	0.010165	0.00524596	0.787139
CHST5	0	0	0	0	0.0490527	0.827444	0.724895	3.58493e-32	0.0526924	-0.00187644	0.000968509	0.787139
SAC3D1	0	0	0	0	0.0494759	0.838021	0.721911	4.93448e-32	0.0527026	-0.00187351	0.000967041	0.787139
POLD4	0	0	0	0	0.0495392	0.837169	0.729011	4.41959e-32	0.0527468	0.00688396	0.00355392	0.787139
CENPU	0	0	0	0	0.0503531	0.835615	0.721329	3.97385e-32	0.0527527	-0.00445675	0.00230091	0.787139
FKBP4	0	0	0	0	0.0498912	0.837262	0.723492	3.51706e-32	0.0527532	-0.00377922	0.00195112	0.787139
GPR137	0	0	0	0	0.0491884	0.832533	0.722389	4.06001e-32	0.0527786	0.00400044	0.00206555	0.787139
PLAGL2	0	0	0	0	0.0484792	0.829791	0.720015	3.8754e-32	0.0528123	0.00218581	0.00112876	0.787139
PBXIP1	0	0	0	0	0.0489199	0.833541	0.726651	3.84711e-32	0.0529303	0.00194442	0.00100461	0.787139
SIK2	0	0	0	0	0.0491785	0.830207	0.725452	2.76328e-32	0.0529896	0.0023766	0.0012282	0.787139
DMTF1	0	0	0	0	0.0494404	0.838397	0.723048	4.2826e-32	0.0530044	-0.00349376	0.00180565	0.787139
SELENBP1	0	0	0	0	0.0499441	0.829634	0.726309	3.68958e-32	0.0530947	-0.00241836	0.00125034	0.787139
CPEB4	0	0	0	0	0.050047	0.839781	0.717397	4.13392e-32	0.053139	-0.00413972	0.00214071	0.787139
CTU2	0	0	0	0	0.0490748	0.834568	0.718509	4.10755e-32	0.0532468	0.00127202	0.000658081	0.787139
SCN7A	0	0	0	0	0.0487108	0.829446	0.722159	3.79516e-32	0.0532545	0.00112739	0.000583274	0.787139
KLHL28	0	0	0	0	0.0500122	0.832651	0.718682	3.51144e-32	0.0532844	0.00324772	0.00168047	0.787139
MTCH2	0	0	0	0	0.04938	0.831289	0.715763	4.40838e-32	0.0533675	0.00433818	0.00224549	0.787139
KIAA1217	0	0	0	0	0.0499209	0.835175	0.712594	4.69527e-32	0.0534036	0.000873722	0.000452317	0.787139
NXPE2	0	0	0	0	0.0493372	0.836446	0.71849	3.19943e-32	0.0534835	0.00125183	0.000648278	0.787139
LDLRAD4	0	0	0	0	0.0492566	0.832347	0.719803	3.5165e-32	0.0534909	-0.00190817	0.000988201	0.787139
DCST2	0	0	0	0	0.049976	0.838796	0.721427	4.14451e-32	0.0534937	0.00186829	0.00096756	0.787139
CMYA5	0	0	0	0	0.0502661	0.839002	0.723705	4.45753e-32	0.0535333	-0.000738501	0.000382522	0.787139
HSD3B7	0	0	0	0	0.0498493	0.838173	0.726942	4.10658e-32	0.0535359	-0.00247261	0.00128076	0.787139
TBC1D10A	0	0	0	0	0.0484861	0.834641	0.727019	3.84065e-32	0.0536119	-0.0027663	0.00143334	0.787139
CTSB	0	0	0	0	0.0493618	0.837095	0.719663	3.38466e-32	0.0536914	0.00160616	0.000832494	0.787139
OR9I1	0	0	0	0	0.0499405	0.837434	0.726171	3.78521e-32	0.0537192	0.00207914	0.00107777	0.787139
TRIM31	0	0	0	0	0.0492775	0.842239	0.724636	5.30374e-32	0.0537564	0.001194	0.000619034	0.787139
PAM16	0	0	0	0	0.0501518	0.827977	0.720599	3.96514e-32	0.0537887	-0.0202072	0.0104779	0.787139
ITGA6	0	0	0	0	0.04844	0.841782	0.724126	4.99155e-32	0.0538036	0.00146251	0.000758393	0.787139
ANKRD60	0	0	0	0	0.0502628	0.833437	0.733916	4.0967e-32	0.0538848	0.00256065	0.00132829	0.787139
GUCD1	0	0	0	0	0.049094	0.835705	0.726587	4.14546e-32	0.0538996	0.00406102	0.00210671	0.787139
TTC3	0	0	0	0	0.0496109	0.835071	0.731444	4.4014e-32	0.0539668	0.00173998	0.000902894	0.787139
LCE6A	0	0	0	0	0.0489547	0.831136	0.730284	3.52024e-32	0.0539896	-0.00597356	0.00310003	0.787139
NPIPB15	0	0	0	0	0.0489786	0.840101	0.72835	3.78796e-32	0.0540049	0.00253442	0.00131534	0.787139
PIMREG	0	0	0	0	0.0499082	0.832396	0.722331	3.48604e-32	0.0540286	-0.00538517	0.00279513	0.787139
NSDHL	0	0	0	0	0.0506586	0.833082	0.725152	4.09697e-32	0.0540541	-0.00644765	0.00334696	0.787139
EIF4E3	0	0	0	0	0.0489223	0.827902	0.722251	4.24595e-32	0.0540634	0.00414596	0.00215224	0.787139
G3BP1	0	0	0	0	0.0495472	0.835968	0.725661	5.10319e-32	0.0540929	-0.0037168	0.0019297	0.787139
ACTR8	0	0	0	0	0.0496509	0.839174	0.720221	4.03306e-32	0.0541501	0.00221189	0.00114864	0.787139
AP3M1	0	0	0	0	0.0505156	0.833751	0.721153	3.78133e-32	0.0541675	-0.00351302	0.00182446	0.787139
TRPC5	0	0	0	0	0.0478593	0.835635	0.725296	3.74718e-32	0.0541866	0.00495637	0.00257426	0.787139
SOX2	0	0	0	0	0.0500054	0.830495	0.726299	4.80683e-32	0.0542123	-0.00856507	0.00444903	0.787139
HRH3	0	0	0	0	0.0500527	0.83736	0.7159	4.34841e-32	0.0542381	0.00403365	0.00209546	0.787139
C4orf17	0	0	0	0	0.0496511	0.835066	0.72676	4.16216e-32	0.0542394	0.002934	0.00152421	0.787139
DEK	0	0	0	0	0.0492693	0.831064	0.723736	3.60333e-32	0.0542882	0.00286931	0.0014909	0.787139
ALDH7A1	0	0	0	0	0.0490622	0.832841	0.730936	3.29487e-32	0.0544524	-0.00147583	0.00076737	0.787139
ADGRB3	0	0	0	0	0.0496689	0.8395	0.728333	4.99343e-32	0.054463	0.0017344	0.000901852	0.787139
TMEM14A	0	0	0	0	0.0494344	0.841454	0.727003	3.29975e-32	0.0544905	0.00771957	0.00401448	0.787139
METTL21C	0	0	0	0	0.0496162	0.839161	0.717246	4.49193e-32	0.054546	-0.00221239	0.0011508	0.787139
HACD4	0	0	0	0	0.0478054	0.84196	0.720082	3.26584e-32	0.0545832	-0.00207593	0.00107998	0.787139
LMOD1	0	0	0	0	0.0496593	0.833349	0.72439	3.81156e-32	0.0545988	-0.00267355	0.00139098	0.787139
RAB3A	0	0	0	0	0.0498474	0.839318	0.726387	3.94398e-32	0.0546135	-0.00586557	0.00305188	0.787139
CNR2	0	0	0	0	0.0492892	0.835276	0.726688	3.47224e-32	0.0546252	-0.00332995	0.00173267	0.787139
SQSTM1	0	0	0	0	0.0496862	0.836912	0.720795	3.6663e-32	0.0546839	0.00163907	0.000853061	0.787139
TYMS	0	0	0	0	0.0502048	0.833432	0.733537	3.42958e-32	0.054759	-0.00452804	0.00235738	0.787139
WDR76	0	0	0	0	0.0496391	0.838074	0.727188	4.44906e-32	0.0548944	0.00157345	0.000819621	0.787139
WDR74	0	0	0	0	0.0483911	0.838702	0.730222	4.11649e-32	0.0549434	-0.00254045	0.00132361	0.787139
ZKSCAN1	0	0	0	0	0.0488994	0.837532	0.72666	4.14159e-32	0.0550274	0.00449033	0.00234033	0.787139
RPS8	0	0	0	0	0.0501957	0.834852	0.718166	3.68194e-32	0.0551589	-0.00427558	0.00222961	0.787139
OR10K2	0	0	0	0	0.0484271	0.832989	0.722122	3.72057e-32	0.0552371	0.00586344	0.00305862	0.787139
MED19	0	0	0	0	0.0500441	0.837081	0.726521	3.70706e-32	0.055244	-0.00488806	0.00254989	0.787139
SFR1	0	0	0	0	0.0495893	0.830068	0.725629	3.74105e-32	0.0552957	-0.00597178	0.00311588	0.787139
CAND2	0	0	0	0	0.0491411	0.831996	0.724443	4.55586e-32	0.0553064	0.000992399	0.000517824	0.787139
RFX8	0	0	0	0	0.0486833	0.836382	0.721625	3.29586e-32	0.0553143	0.00238635	0.00124522	0.787139
CD3E	0	0	0	0	0.0497909	0.835942	0.721491	3.53697e-32	0.0553304	0.00386667	0.00201779	0.787139
PFDN2	0	0	0	0	0.0490318	0.836972	0.727647	4.21643e-32	0.0554392	0.0045367	0.0023685	0.787139
BARHL2	0	0	0	0	0.0494393	0.832892	0.72783	3.84999e-32	0.0554731	0.0037926	0.0019803	0.787139
EXOSC1	0	0	0	0	0.0500123	0.82776	0.722325	4.3075e-32	0.0554884	0.00255474	0.00133404	0.787139
LEPROTL1	0	0	0	0	0.0506978	0.826795	0.723454	4.03084e-32	0.0555138	0.00692745	0.00361775	0.787139
ORMDL2	0	0	0	0	0.050234	0.832514	0.722992	4.3026e-32	0.055517	0.00714803	0.003733	0.787139
TBC1D22B	0	0	0	0	0.0504605	0.830977	0.728237	4.45526e-32	0.055534	0.00284113	0.00148386	0.787139
C6orf226	0	0	0	0	0.0500188	0.836656	0.71863	3.93836e-32	0.0555432	0.0062218	0.00324963	0.787139
MAP6D1	0	0	0	0	0.0506836	0.839506	0.725202	3.88197e-32	0.0555896	-0.00384671	0.00200951	0.787139
ARHGEF37	0	0	0	0	0.0484545	0.848712	0.724195	5.19859e-32	0.055664	0.00210872	0.00110192	0.787139
ZC3H7B	0	0	0	0	0.0488749	0.828373	0.72872	4.32051e-32	0.0556931	0.00157493	0.000823085	0.787139
TRPM1	0	0	0	0	0.0492328	0.838928	0.725329	4.46023e-32	0.0556944	0.000774636	0.00040484	0.787139
SVIP	0	0	0	0	0.0498288	0.837214	0.721252	3.78278e-32	0.0559018	0.00842992	0.00440938	0.787139
LGALS7	0	0	0	0	0.0507813	0.833986	0.72751	3.4286e-32	0.0559174	-0.011582	0.00605851	0.787139
CYP1A2	0	0	0	0	0.0497754	0.837394	0.718739	3.57239e-32	0.0560714	-0.00154785	0.000810181	0.787139
GAGE12J	0	0	0	0	0.0491712	0.841497	0.728444	4.07025e-32	0.0560957	-0.0245431	0.0128477	0.787139
PSMD7	0	0	0	0	0.0499492	0.839844	0.730208	4.21204e-32	0.0561009	-0.00451934	0.00236582	0.787139
UNC13B	0	0	0	0	0.0495026	0.835701	0.72093	4.35271e-32	0.0561439	-0.00100311	0.000525209	0.787139
CCDC69	0	0	0	0	0.0499707	0.843641	0.724338	4.29824e-32	0.0561578	-0.0029508	0.00154507	0.787139
NUTM2G	0	0	0	0	0.0491909	0.841585	0.73089	4.33825e-32	0.0562328	0.00178129	0.000932981	0.787139
PGLYRP3	0	0	0	0	0.048589	0.839528	0.731037	4.75143e-32	0.0562364	-0.00301122	0.0015772	0.787139
HLA-DMA	0	0	0	0	0.0490956	0.833815	0.72518	3.80302e-32	0.0563146	0.00705163	0.00369464	0.787139
PIM2	0	0	0	0	0.0502419	0.840223	0.722556	3.30246e-32	0.0563941	-0.0102478	0.00537098	0.787139
RHOBTB2	0	0	0	0	0.0491741	0.836707	0.720081	3.66387e-32	0.0564071	0.00161404	0.00084598	0.787139
C22orf15	0	0	0	0	0.0493886	0.826843	0.724738	4.9606e-32	0.0564173	0.00423358	0.00221907	0.787139
COCH	0	0	0	0	0.048713	0.838849	0.722351	4.51086e-32	0.0565028	0.00188961	0.000990804	0.787139
CPSF6	0	0	0	0	0.0505825	0.836836	0.726398	4.08955e-32	0.0565355	0.0069895	0.00366537	0.787139
KRT32	0	0	0	0	0.0498077	0.839031	0.7235	4.1761e-32	0.0565596	-0.00197679	0.00103675	0.787139
ZNF234	0	0	0	0	0.0498249	0.836266	0.726465	4.25912e-32	0.0565644	-0.00151714	0.000795699	0.787139
SLC22A12	0	0	0	0	0.0495127	0.833195	0.7218	3.6182e-32	0.0566057	0.00257514	0.00135082	0.787139
KLRC1	0	0	0	0	0.0488123	0.841957	0.72283	4.54035e-32	0.0566561	0.00996232	0.0052269	0.787139
EIF4A2	0	0	0	0	0.049545	0.833382	0.719586	3.87495e-32	0.0566753	0.0104826	0.00550028	0.787139
IFNK	0	0	0	0	0.0495041	0.837299	0.721343	3.83273e-32	0.0566897	-0.00433324	0.00227382	0.787139
TMED4	0	0	0	0	0.0500359	0.833974	0.721149	3.558e-32	0.0567417	-0.00371569	0.00195017	0.787139
KIAA0141	0	0	0	0	0.0509835	0.833336	0.737986	4.92079e-32	0.0568512	0.00154411	0.000810781	0.787139
NUDT8	0	0	0	0	0.0496978	0.828803	0.722031	4.48544e-32	0.0568576	0.00235462	0.0012364	0.787139
PRSS21	0	0	0	0	0.050891	0.837386	0.728472	3.99232e-32	0.0568957	-0.00299267	0.00157168	0.787139
DCK	0	0	0	0	0.0494305	0.834872	0.720333	3.78906e-32	0.0569041	0.00391646	0.0020569	0.787139
THAP2	0	0	0	0	0.0498962	0.832676	0.722378	3.12275e-32	0.056949	-0.0031914	0.0016764	0.787139
CLDN20	0	0	0	0	0.0492844	0.843784	0.723508	3.77092e-32	0.0570174	-0.0026419	0.00138814	0.787139
HAND2	0	0	0	0	0.0501888	0.833424	0.722194	3.96038e-32	0.0570292	0.0076858	0.00403856	0.787139
DGCR14	0	0	0	0	0.0501527	0.832074	0.726139	4.01595e-32	0.0570461	0.00257263	0.0013519	0.787139
HDAC9	0	0	0	0	0.0496475	0.834981	0.725353	4.3479e-32	0.0571473	0.00211069	0.0011096	0.787139
SLF2	0	0	0	0	0.0502145	0.838395	0.725438	3.44348e-32	0.0571534	-0.00181998	0.000956802	0.787139
ESRRB	0	0	0	0	0.0500351	0.832099	0.730368	4.37725e-32	0.0571675	-0.00348073	0.00182999	0.787139
RNF146	0	0	0	0	0.0487651	0.826713	0.723831	3.61525e-32	0.0572438	-0.00480335	0.00252614	0.787139
PKHD1L1	0	0	0	0	0.0504428	0.835464	0.718294	3.35789e-32	0.057263	-0.000563494	0.000296371	0.787139
ATP10A	0	0	0	0	0.0504705	0.840429	0.72836	4.46956e-32	0.0572709	-0.000944715	0.000496891	0.787139
LPGAT1	0	0	0	0	0.049255	0.830168	0.728911	4.0846e-32	0.0573057	0.00760975	0.00400305	0.787139
FAM172A	0	0	0	0	0.0490166	0.84055	0.720303	4.47859e-32	0.0573122	0.00339203	0.0017844	0.787139
LILRB1	0	0	0	0	0.050756	0.834215	0.721686	4.49273e-32	0.0573646	0.0022371	0.00117709	0.787139
PBK	0	0	0	0	0.0495997	0.838653	0.723761	3.59568e-32	0.0573939	-0.00360606	0.00189761	0.787139
C9orf47	0	0	0	0	0.04946	0.838891	0.724217	3.51025e-32	0.0574117	-0.00299297	0.0015751	0.787139
MELTF	0	0	0	0	0.04971	0.824147	0.723119	4.54605e-32	0.0574381	0.0014281	0.000751642	0.787139
FNDC4	0	0	0	0	0.0508885	0.835863	0.726061	3.77148e-32	0.0574418	-0.00718905	0.00378381	0.787139
CLIP3	0	0	0	0	0.0489798	0.836997	0.722776	4.18435e-32	0.0575917	0.00386116	0.00203346	0.787139
ADGRE3	0	0	0	0	0.0506315	0.830775	0.719558	3.5213e-32	0.0576137	-0.00154977	0.000816253	0.787139
IER3	0	0	0	0	0.0492957	0.836772	0.720917	3.34649e-32	0.057648	-0.00319942	0.00168534	0.787139
DNAJC5	0	0	0	0	0.0478401	0.841307	0.72315	3.70822e-32	0.0576774	0.00394748	0.00207964	0.787139
REPS2	0	0	0	0	0.0498717	0.832948	0.723784	3.45571e-32	0.0576774	0.00375923	0.00198046	0.787139
LURAP1	0	0	0	0	0.049494	0.843323	0.725956	3.864e-32	0.0576982	-0.00541063	0.0028507	0.787139
ARSH	0	0	0	0	0.0495309	0.834385	0.728335	4.75319e-32	0.0577322	-0.00171927	0.000905957	0.787139
GRWD1	0	0	0	0	0.0515865	0.83019	0.723153	4.10061e-32	0.0578189	-0.00249002	0.00131255	0.787139
SGK494	0	0	0	0	0.0489896	0.834152	0.730945	4.88116e-32	0.057827	0.00168691	0.000889243	0.787139
MC1R	0	0	0	0	0.0496441	0.837478	0.728716	3.4628e-32	0.0579417	-0.00122722	0.000647214	0.787139
RNF150	0	0	0	0	0.0499239	0.829335	0.727541	3.55883e-32	0.0579786	-0.00259761	0.00137014	0.787139
ZBTB4	0	0	0	0	0.0496041	0.834089	0.725043	3.71315e-32	0.0581506	0.00298086	0.00157337	0.787139
PREPL	0	0	0	0	0.050793	0.831545	0.724735	3.39212e-32	0.058194	-0.00186242	0.000983197	0.787139
IGFBP7	0	0	0	0	0.0489554	0.842743	0.712958	3.63272e-32	0.0582188	-0.00315996	0.00166835	0.787139
TARM1	0	0	0	0	0.0485176	0.830449	0.727929	3.9686e-32	0.0582467	-0.00488787	0.00258091	0.787139
INPP1	0	0	0	0	0.0494423	0.837515	0.720043	3.28946e-32	0.0583186	0.00368595	0.00194683	0.787139
RPS4X	0	0	0	0	0.0496904	0.838066	0.723824	3.85131e-32	0.0583227	0.0169201	0.00893693	0.787139
MC3R	0	0	0	0	0.0497139	0.836221	0.720566	4.25365e-32	0.0583315	-0.00244794	0.00129301	0.787139
EPGN	0	0	0	0	0.0505076	0.836086	0.719823	3.82003e-32	0.0583369	0.00583555	0.00308242	0.787139
KRT31	0	0	0	0	0.0493429	0.842903	0.721246	3.70509e-32	0.0583499	-0.00240749	0.00127174	0.787139
MEP1B	0	0	0	0	0.0499879	0.843396	0.724708	4.9488e-32	0.0583507	-0.00174861	0.000923693	0.787139
FUT2	0	0	0	0	0.0491851	0.832965	0.724211	2.95456e-32	0.0583718	-0.00169402	0.000894927	0.787139
YWHAG	0	0	0	0	0.0498246	0.836161	0.721221	4.25191e-32	0.0584333	0.00838778	0.00443224	0.787139
SIN3B	0	0	0	0	0.0490538	0.833278	0.719391	3.03603e-32	0.0584382	-0.00199359	0.00105346	0.787139
KLK13	0	0	0	0	0.050828	0.834829	0.723738	4.1914e-32	0.0585062	0.00268536	0.0014194	0.787139
TRAPPC10	0	0	0	0	0.0500597	0.831784	0.718721	3.51145e-32	0.0585238	-0.00164665	0.000870426	0.787139
ZNF248	0	0	0	0	0.049547	0.840235	0.725999	4.5734e-32	0.0586278	0.00402396	0.00212797	0.787139
TAF11	0	0	0	0	0.0494484	0.8313	0.718844	4.50624e-32	0.0586534	0.00544653	0.00288054	0.787139
PLEKHF2	0	0	0	0	0.0494337	0.848461	0.724842	3.96739e-32	0.0587988	-0.00859409	0.00454784	0.787139
MICAL2	0	0	0	0	0.0493456	0.835581	0.72366	3.66762e-32	0.0588199	0.000817064	0.000432412	0.787139
XPO5	0	0	0	0	0.0490084	0.837617	0.723967	3.64714e-32	0.0588518	-0.00240527	0.00127309	0.787139
ZKSCAN4	0	0	0	0	0.0486715	0.836816	0.729084	4.18484e-32	0.0588639	0.00315515	0.00167008	0.787139
CAPS2	0	0	0	0	0.0502307	0.836592	0.72143	3.78031e-32	0.0588987	0.00169979	0.000899853	0.787139
GPATCH2L	0	0	0	0	0.0488672	0.842591	0.724731	3.77932e-32	0.0589114	0.00323023	0.00171014	0.787139
PITPNB	0	0	0	0	0.0500914	0.839582	0.722477	3.7312e-32	0.0589552	0.00673933	0.00356853	0.787139
PTPRE	0	0	0	0	0.0501032	0.835839	0.727054	4.23921e-32	0.0589781	-0.00207061	0.00109651	0.787139
RPL10	0	0	0	0	0.0501398	0.833901	0.71856	4.35252e-32	0.05898	-0.0184993	0.00979652	0.787139
RPS28	0	0	0	0	0.0498036	0.830103	0.726237	4.34125e-32	0.0590215	-0.032475	0.0172003	0.787139
USP51	0	0	0	0	0.0509996	0.831431	0.726324	4.22758e-32	0.0590921	0.00642737	0.00340519	0.787139
SATL1	0	0	0	0	0.0494079	0.829306	0.722456	4.25382e-32	0.059101	0.00896188	0.00474813	0.787139
SLC9A9	0	0	0	0	0.0501952	0.833407	0.725677	5.36379e-32	0.0592335	-0.00199964	0.00105999	0.787139
EPHA2	0	0	0	0	0.0489463	0.835866	0.723764	4.19132e-32	0.0592541	0.00110419	0.000585369	0.787139
ZPR1	0	0	0	0	0.0480879	0.831846	0.726925	3.14363e-32	0.0592644	-0.00123124	0.000652749	0.787139
OR4K15	0	0	0	0	0.0492906	0.840875	0.720112	3.98274e-32	0.0592744	-0.00466835	0.00247505	0.787139
OR2W1	0	0	0	0	0.0493913	0.834642	0.726732	4.17692e-32	0.0593256	0.00469315	0.0024887	0.787139
STAG1	0	0	0	0	0.0486832	0.838202	0.726868	4.18981e-32	0.0593451	0.00486439	0.0025797	0.787139
CTF1	0	0	0	0	0.0499184	0.834964	0.725849	3.60132e-32	0.0594753	-0.00561938	0.00298162	0.787977
PTHLH	0	0	0	0	0.049053	0.838636	0.716733	2.93576e-32	0.0595193	0.00732279	0.0038861	0.787977
MPHOSPH6	0	0	0	0	0.0490998	0.833672	0.723406	3.71972e-32	0.0595356	0.00620549	0.00329338	0.787977
ANKHD1-EIF4EBP3	0	0	0	0	0.0501228	0.846175	0.720913	3.5877e-32	0.0595885	-0.00865424	0.00459394	0.788114
ABCD3	0	0	0	0	0.0496746	0.839656	0.722433	3.98302e-32	0.0596317	-0.00302668	0.00160693	0.788124
NCOA1	0	0	0	0	0.0492045	0.833281	0.723643	4.58926e-32	0.0598028	0.00246514	0.00130967	0.789822
DZIP3	0	0	0	0	0.0496081	0.844223	0.723629	4.26788e-32	0.0599155	-0.00209147	0.00111164	0.790749
CENPJ	0	0	0	0	0.0494592	0.831367	0.724736	4.47972e-32	0.0599823	0.0012706	0.000675516	0.791067
ERP44	0	0	0	0	0.0508045	0.834523	0.722849	4.23364e-32	0.0600974	0.00362266	0.00192685	0.792022
TYSND1	0	0	0	0	0.0499081	0.836327	0.729363	4.43292e-32	0.0601725	0.00192189	0.00102253	0.792449
NPAS3	0	0	0	0	0.049346	0.83131	0.723407	4.15568e-32	0.0603218	0.00224799	0.00119673	0.793544
RBBP8	0	0	0	0	0.0492794	0.833382	0.721102	3.78078e-32	0.0603712	0.00179512	0.000955821	0.793544
NFKBIE	0	0	0	0	0.0494114	0.837284	0.725897	3.58549e-32	0.0603839	-0.00262176	0.00139604	0.793544
ALG10	0	0	0	0	0.0507137	0.833201	0.723944	4.61049e-32	0.0605409	0.00261164	0.00139151	0.793832
IKZF4	0	0	0	0	0.0499946	0.840027	0.725822	4.19431e-32	0.0605424	-0.00177216	0.000944225	0.793832
CLEC18C	0	0	0	0	0.049338	0.833596	0.731853	3.76217e-32	0.0605632	-0.00460103	0.00245168	0.793832
TMEM185B	0	0	0	0	0.0495215	0.829903	0.728556	4.15522e-32	0.0605769	0.00352688	0.00187941	0.793832
PIH1D2	0	0	0	0	0.0503557	0.832879	0.719008	3.59456e-32	0.0607776	-0.00445928	0.00237812	0.795703
NOL4	0	0	0	0	0.0504737	0.829811	0.725653	4.32389e-32	0.0608102	-0.00207013	0.00110413	0.795703
DENND3	0	0	0	0	0.0500024	0.828927	0.725659	3.93698e-32	0.060882	-0.00147712	0.000788066	0.795703
SUV39H1	0	0	0	0	0.04918	0.830609	0.722526	3.4759e-32	0.0608962	-0.0110077	0.00587309	0.795703
HPX	0	0	0	0	0.0492282	0.83753	0.725591	4.06144e-32	0.0609341	-0.00260151	0.00138822	0.795703
DEFB118	0	0	0	0	0.0492056	0.840363	0.719546	4.64e-32	0.0610246	-0.00359416	0.00191859	0.796213
PIGX	0	0	0	0	0.0488528	0.837431	0.733846	4.35164e-32	0.061059	0.00333797	0.00178207	0.796213
SPACA7	0	0	0	0	0.0503288	0.838384	0.724785	3.65263e-32	0.0612031	-0.00502314	0.00268324	0.797531
IGFBP2	0	0	0	0	0.0490823	0.836811	0.725288	4.52397e-32	0.061345	0.00405105	0.00216516	0.798687
MAP2K4	0	0	0	0	0.0502203	0.837194	0.721535	3.21906e-32	0.0613779	-0.00599396	0.003204	0.798687
DNAJC22	0	0	0	0	0.0492851	0.834361	0.722503	4.03973e-32	0.0614682	0.00327864	0.00175317	0.79909
TMPRSS15	0	0	0	0	0.0494392	0.832404	0.722008	3.72281e-32	0.0616385	-0.000921283	0.000492954	0.79909
PIGL	0	0	0	0	0.0490419	0.836589	0.721581	3.07519e-32	0.0617254	-0.00221065	0.00118325	0.79909
ATG3	0	0	0	0	0.0494727	0.838101	0.718109	4.41575e-32	0.0617868	-0.00395004	0.00211477	0.79909
ANKRD6	0	0	0	0	0.0496212	0.83854	0.714182	3.48922e-32	0.0618178	-0.00157891	0.000845415	0.79909
WDR75	0	0	0	0	0.0498854	0.835181	0.725726	4.37805e-32	0.0618417	-0.00191575	0.00102587	0.79909
APH1B	0	0	0	0	0.0482912	0.84046	0.728232	4.98424e-32	0.0618482	-0.00240647	0.00128868	0.79909
CSDC2	0	0	0	0	0.0498723	0.837374	0.729233	4.01367e-32	0.0618631	-0.00688086	0.00368495	0.79909
FAM198B	0	0	0	0	0.0501138	0.83867	0.725491	3.99436e-32	0.0619296	-0.00195915	0.00104946	0.79909
BMS1	0	0	0	0	0.0497081	0.835389	0.726766	4.49577e-32	0.0619474	-0.00124238	0.000665556	0.79909
STIL	0	0	0	0	0.0482907	0.831887	0.726861	3.84874e-32	0.0619706	-0.00149183	0.000799256	0.79909
DNAJB5	0	0	0	0	0.0492535	0.837937	0.726035	4.13743e-32	0.0619992	-0.00523485	0.00280491	0.79909
SERTAD3	0	0	0	0	0.0493592	0.834284	0.728188	3.69431e-32	0.0620264	-0.00975677	0.00522837	0.79909
EPS8L1	0	0	0	0	0.048907	0.838184	0.720378	4.14007e-32	0.0620267	-0.00162856	0.000872699	0.79909
MED24	0	0	0	0	0.0493269	0.834835	0.724747	3.3819e-32	0.0620853	0.00133195	0.000713916	0.79909
MUC15	0	0	0	0	0.0489183	0.836634	0.728241	3.96777e-32	0.0621596	0.00420609	0.00225507	0.79909
EID2B	0	0	0	0	0.0501468	0.837986	0.726036	3.82302e-32	0.0621717	-0.00562675	0.00301689	0.79909
NOP56	0	0	0	0	0.0492024	0.83734	0.733346	4.57622e-32	0.0622151	0.00223728	0.00119976	0.79909
SCAMP3	0	0	0	0	0.0485183	0.835937	0.719624	4.07489e-32	0.0622283	0.00298601	0.00160135	0.79909
METTL7B	0	0	0	0	0.0489612	0.83259	0.719041	3.5433e-32	0.0622701	0.00144833	0.000776844	0.79909
TCF15	0	0	0	0	0.0497116	0.836208	0.722541	4.06452e-32	0.0623399	-0.00204744	0.00109848	0.799433
CST6	0	0	0	0	0.0493071	0.833569	0.723907	3.94401e-32	0.0625262	-0.00675034	0.00362423	0.800221
ATP13A2	0	0	0	0	0.0509777	0.833654	0.717001	4.52842e-32	0.0625487	-0.00152719	0.000820009	0.800221
NXNL2	0	0	0	0	0.0490846	0.839874	0.720268	4.26254e-32	0.0625814	0.0042108	0.00226124	0.800221
UBE2D4	0	0	0	0	0.0493316	0.835372	0.716569	3.51044e-32	0.0626516	-0.00554705	0.00297961	0.800221
LGALS9B	0	0	0	0	0.048193	0.828635	0.716741	3.45573e-32	0.0626853	-0.00401651	0.00215775	0.800221
NAV1	0	0	0	0	0.0490071	0.824409	0.719964	3.89598e-32	0.0626956	0.00135118	0.00072591	0.800221
PIKFYVE	0	0	0	0	0.0498834	0.830367	0.720193	4.17307e-32	0.0628732	-0.00120296	0.00064672	0.800221
HRAS	0	0	0	0	0.0490962	0.829634	0.727908	4.19649e-32	0.0629047	0.00376067	0.002022	0.800221
RITA1	0	0	0	0	0.0491138	0.834916	0.724618	2.90742e-32	0.0629984	-0.0018511	0.000995636	0.800221
SPATA16	0	0	0	0	0.0496906	0.836859	0.723283	3.41786e-32	0.0630207	0.00217042	0.00116748	0.800221
MRPL50	0	0	0	0	0.0490867	0.838267	0.724522	4.87692e-32	0.0630739	-0.00264425	0.00142264	0.800221
PIGU	0	0	0	0	0.0473988	0.834106	0.730697	4.88598e-32	0.063101	0.00196285	0.00105615	0.800221
RGL1	0	0	0	0	0.0494767	0.832182	0.724957	3.85869e-32	0.0631094	0.00155873	0.000838732	0.800221
CCNDBP1	0	0	0	0	0.0489309	0.834054	0.729118	3.61975e-32	0.063112	-0.00223104	0.0012005	0.800221
ARHGAP24	0	0	0	0	0.0513937	0.836424	0.714567	3.44524e-32	0.0631532	-0.00180419	0.000970972	0.800221
GIMAP6	0	0	0	0	0.0494373	0.836532	0.725423	3.69765e-32	0.0631905	0.00292895	0.00157651	0.800221
EMC8	0	0	0	0	0.0493749	0.828776	0.726809	3.51193e-32	0.0632146	-0.0059094	0.00318104	0.800221
SLC22A1	0	0	0	0	0.0494718	0.826103	0.720628	3.50585e-32	0.0632187	0.0011479	0.000617926	0.800221
UPK1B	0	0	0	0	0.0494838	0.839639	0.718584	3.54234e-32	0.0632207	-0.00346214	0.00186372	0.800221
STX3	0	0	0	0	0.0478471	0.837772	0.720247	4.47756e-32	0.0633473	0.00320625	0.0017268	0.800661
IL24	0	0	0	0	0.0490537	0.837268	0.721654	3.75822e-32	0.0633858	0.0032374	0.00174383	0.800661
TUBA1C	0	0	0	0	0.0497769	0.836585	0.731896	3.96832e-32	0.0634028	-0.00440061	0.00237055	0.800661
GTPBP1	0	0	0	0	0.0496108	0.834156	0.726172	4.54465e-32	0.0634281	-0.0023643	0.00127374	0.800661
OTOR	0	0	0	0	0.0491018	0.843952	0.728204	3.77852e-32	0.0636534	0.00469812	0.0025332	0.801092
P2RY8	0	0	0	0	0.0500619	0.832829	0.721688	3.72387e-32	0.0637115	-0.00958336	0.00516844	0.801092
GSG1	0	0	0	0	0.0491724	0.839711	0.721181	3.09963e-32	0.0637456	0.000945682	0.000510085	0.801092
GPR161	0	0	0	0	0.0498885	0.830712	0.723456	4.2622e-32	0.0637725	-0.00289756	0.00156305	0.801092
TAS2R43	0	0	0	0	0.0493863	0.83149	0.721203	3.6509e-32	0.0637913	-0.00516374	0.00278572	0.801092
CTPS2	0	0	0	0	0.0489997	0.831172	0.725414	3.05212e-32	0.06384	0.00322016	0.00173752	0.801092
KLF13	0	0	0	0	0.0492824	0.837774	0.726247	3.82997e-32	0.0638433	-0.00527545	0.00284654	0.801092
SLC35E1	0	0	0	0	0.0493376	0.835482	0.729915	4.65147e-32	0.0638562	0.00441266	0.00238111	0.801092
IFRD1	0	0	0	0	0.0492892	0.834392	0.721049	4.28231e-32	0.0638984	0.00267799	0.00144529	0.801092
ASB11	0	0	0	0	0.0491201	0.842411	0.718778	3.81059e-32	0.0639856	-0.00189694	0.0010241	0.801092
MZF1	0	0	0	0	0.0487352	0.834473	0.723092	4.71915e-32	0.0640666	0.0014894	0.000804329	0.801092
CENPE	0	0	0	0	0.0497238	0.834478	0.719969	4.64526e-32	0.0641409	0.00170512	0.000921082	0.801092
CUL2	0	0	0	0	0.0490908	0.837097	0.723262	4.25456e-32	0.0642075	-0.00219997	0.00118869	0.801092
ZNF561	0	0	0	0	0.0497817	0.838704	0.724713	4.60822e-32	0.0642419	0.00252527	0.00136464	0.801092
GRK5	0	0	0	0	0.0508387	0.830265	0.725641	3.72406e-32	0.0643147	-0.00229726	0.00124176	0.801092
MYL12A	0	0	0	0	0.0493223	0.833941	0.72243	4.10079e-32	0.0643584	-0.00806817	0.00436187	0.801092
CAMSAP2	0	0	0	0	0.0492698	0.837302	0.72488	3.39964e-32	0.0643666	-0.00292393	0.0015808	0.801092
CHMP1B	0	0	0	0	0.0488079	0.833928	0.726026	3.80873e-32	0.0643903	0.00565632	0.00305833	0.801092
TMPRSS6	0	0	0	0	0.0504336	0.833419	0.720748	3.59068e-32	0.0644122	-0.00129916	0.000702504	0.801092
BTNL3	0	0	0	0	0.0483094	0.831132	0.723757	3.23038e-32	0.0644491	-0.00492802	0.00266513	0.801092
OLFML3	0	0	0	0	0.0494457	0.844252	0.726209	4.97412e-32	0.0645283	-0.00167669	0.000907042	0.801092
ATP6V1D	0	0	0	0	0.048935	0.836868	0.721505	4.0317e-32	0.0645335	0.00202158	0.00109364	0.801092
CAP2	0	0	0	0	0.0493913	0.838537	0.724876	3.24051e-32	0.0645384	-0.00324273	0.00175429	0.801092
TM4SF4	0	0	0	0	0.0493436	0.832461	0.722294	3.97034e-32	0.0646189	0.00383774	0.00207681	0.801092
SMAD3	0	0	0	0	0.0500355	0.834313	0.719566	3.89832e-32	0.0646225	-0.00637669	0.00345082	0.801092
TBPL1	0	0	0	0	0.0498996	0.830436	0.720766	3.2667e-32	0.0646432	-0.0046463	0.0025146	0.801092
SCN1A	0	0	0	0	0.0491885	0.832599	0.729548	4.92388e-32	0.064737	0.00209017	0.00113161	0.801092
FLT4	0	0	0	0	0.0496483	0.83801	0.724338	3.87752e-32	0.0647734	0.00158676	0.000859181	0.801092
NBPF1	0	0	0	0	0.0494027	0.836201	0.719885	4.35959e-32	0.0648444	-0.0034322	0.00185892	0.801092
C22orf31	0	0	0	0	0.0487619	0.832149	0.721326	3.50974e-32	0.0649066	0.00219511	0.00118917	0.801092
AK8	0	0	0	0	0.0495241	0.836612	0.721284	4.27947e-32	0.0649178	0.0014791	0.000801318	0.801092
SEMA4F	0	0	0	0	0.0499589	0.836915	0.720788	3.18717e-32	0.0650123	0.00140983	0.000764059	0.801092
POLR2J	0	0	0	0	0.0486131	0.832465	0.717933	4.27398e-32	0.0650591	0.00707074	0.00383266	0.801092
HAVCR2	0	0	0	0	0.0505924	0.832717	0.717962	3.41393e-32	0.0650603	-0.00247891	0.00134368	0.801092
ARL14	0	0	0	0	0.0498504	0.828216	0.729459	4.25387e-32	0.0651183	-0.00285525	0.00154802	0.801092
AKAP7	0	0	0	0	0.0497799	0.833131	0.720331	3.66782e-32	0.0651375	-0.00232193	0.00125896	0.801092
ANKEF1	0	0	0	0	0.0496072	0.833551	0.72357	3.45232e-32	0.065156	-0.0020276	0.00109945	0.801092
RAB3GAP2	0	0	0	0	0.0508201	0.835845	0.720767	4.03372e-32	0.0652097	-0.00185187	0.00100436	0.801092
ZNF530	0	0	0	0	0.0491556	0.837971	0.728853	4.21279e-32	0.0652242	0.00352108	0.00190975	0.801092
PRDM5	0	0	0	0	0.0480755	0.838134	0.722907	3.57525e-32	0.0652562	0.00216965	0.00117691	0.801092
CGB5	0	0	0	0	0.0499841	0.839351	0.717729	4.74364e-32	0.0652707	-0.0046253	0.0025091	0.801092
CHTOP	0	0	0	0	0.0498708	0.831597	0.714595	3.82796e-32	0.0653153	0.00539469	0.00292695	0.801092
FAM83G	0	0	0	0	0.0497963	0.841276	0.730143	3.89628e-32	0.0653187	-0.00128659	0.000698063	0.801092
PROB1	0	0	0	0	0.0497496	0.831669	0.725632	3.34314e-32	0.0653824	-0.00149146	0.000809411	0.801344
ATAD5	0	0	0	0	0.0491277	0.832575	0.722522	3.59773e-32	0.0654462	-0.00169226	0.000918603	0.801416
CCL7	0	0	0	0	0.0494269	0.838994	0.72003	3.17591e-32	0.0654746	-0.0100357	0.00544821	0.801416
OR11H12	0	0	0	0	0.0499216	0.838558	0.723992	4.11749e-32	0.0655456	0.00291849	0.00158482	0.801756
GDI1	0	0	0	0	0.0489221	0.836687	0.727167	4.01299e-32	0.0656373	-0.01249	0.00678471	0.802224
FOXH1	0	0	0	0	0.0495092	0.826629	0.71948	4.22465e-32	0.0656703	0.00202901	0.00110231	0.802224
KRT37	0	0	0	0	0.0492592	0.831607	0.725272	4.30291e-32	0.0657159	-0.00152133	0.000826643	0.802253
RNF32	0	0	0	0	0.0502304	0.835277	0.724014	4.52266e-32	0.065808	0.00394568	0.00214469	0.802831
PRELP	0	0	0	0	0.0497646	0.835141	0.717259	4.71151e-32	0.0658498	-0.00314796	0.00171135	0.802831
FANCD2OS	0	0	0	0	0.0488163	0.83995	0.720974	3.82729e-32	0.0659226	-0.00299121	0.00162657	0.802884
C21orf58	0	0	0	0	0.0499249	0.834817	0.719602	3.08034e-32	0.0659834	-0.00272961	0.00148465	0.802884
2002-03-01	0	0	0	0	0.0495015	0.836706	0.718131	3.78654e-32	0.0659997	0.00169248	0.000920605	0.802884
WDR17	0	0	0	0	0.0496192	0.83815	0.721067	3.70475e-32	0.0660493	-0.000999807	0.000543934	0.802884
INSR	0	0	0	0	0.0483937	0.837542	0.724623	4.67378e-32	0.0661	0.00119025	0.000647664	0.802884
CASQ2	0	0	0	0	0.0497695	0.842908	0.724364	4.12211e-32	0.0661137	0.00238533	0.00129802	0.802884
NCOA6	0	0	0	0	0.0497127	0.832679	0.724129	3.31726e-32	0.0662002	-0.00188109	0.00102396	0.802943
INSL5	0	0	0	0	0.0503468	0.837119	0.717933	3.69366e-32	0.0662915	-0.00623342	0.00339426	0.802943
VWA5A	0	0	0	0	0.0489139	0.83639	0.726677	3.64222e-32	0.0663111	-0.00149	0.000811403	0.802943
PRICKLE4	0	0	0	0	0.0501198	0.843443	0.721451	3.84073e-32	0.0663129	-0.00225171	0.00122621	0.802943
CEP85L	0	0	0	0	0.0492527	0.836548	0.719303	3.44216e-32	0.066341	0.00332493	0.00181084	0.802943
UNKL	0	0	0	0	0.0492997	0.840984	0.726612	5.18712e-32	0.0663782	-0.0018241	0.000993587	0.802943
KBTBD3	0	0	0	0	0.04799	0.834755	0.725949	3.53678e-32	0.0664569	-0.00266547	0.0014523	0.80337
AMIGO2	0	0	0	0	0.0485077	0.83184	0.717804	3.45673e-32	0.0666941	-0.00554326	0.00302292	0.804441
AASS	0	0	0	0	0.0499133	0.833279	0.7269	4.94335e-32	0.0667139	0.00126316	0.000688894	0.804441
KCTD5	0	0	0	0	0.0488993	0.828601	0.721358	3.08132e-32	0.0668011	-0.00397613	0.00216916	0.804441
SLC25A41	0	0	0	0	0.0492873	0.839204	0.732349	3.93973e-32	0.0668046	-0.00112999	0.000616471	0.804441
CDK2AP2	0	0	0	0	0.0496634	0.835262	0.721883	3.32112e-32	0.0668535	-0.0154111	0.00840911	0.804441
NECTIN1	0	0	0	0	0.0502014	0.832944	0.720477	3.13428e-32	0.0668773	-0.00201333	0.00109867	0.804441
KLF16	0	0	0	0	0.0509599	0.837166	0.723983	4.57397e-32	0.0669252	0.00562634	0.00307083	0.804441
RTN4RL1	0	0	0	0	0.0500129	0.832579	0.732257	4.1837e-32	0.0669629	0.00280838	0.00153301	0.804441
HID1	0	0	0	0	0.0495658	0.837051	0.72256	3.9622e-32	0.0669704	0.00189777	0.00103597	0.804441
KNL1	0	0	0	0	0.0488905	0.832399	0.729328	4.13043e-32	0.0669789	0.00206809	0.00112898	0.804441
CHID1	0	0	0	0	0.0497855	0.843229	0.730604	4.564e-32	0.0670806	0.00310965	0.0016982	0.805141
RANGRF	0	0	0	0	0.0495452	0.83105	0.728568	4.15947e-32	0.0672715	0.00119384	0.00065242	0.805578
RGS11	0	0	0	0	0.0510405	0.8397	0.723665	3.56828e-32	0.0672884	-0.00181326	0.000990982	0.805578
MYO1G	0	0	0	0	0.049198	0.833789	0.726284	4.83038e-32	0.0673491	0.00129125	0.00070585	0.805578
DPM1	0	0	0	0	0.0495183	0.838323	0.728941	4.42317e-32	0.0673697	0.0026181	0.00143127	0.805578
LAGE3	0	0	0	0	0.0496867	0.836321	0.722582	3.71129e-32	0.0674373	-0.0102447	0.00560199	0.805578
SLC52A2	0	0	0	0	0.0491699	0.834869	0.717968	3.32787e-32	0.0674891	-0.00239221	0.00130835	0.805578
RNF44	0	0	0	0	0.0499327	0.837167	0.721598	4.44937e-32	0.0675188	-0.00234904	0.00128488	0.805578
G6PC2	0	0	0	0	0.0495085	0.840448	0.718799	3.58516e-32	0.0675353	0.00101181	0.000553476	0.805578
HCST	0	0	0	0	0.0491863	0.840492	0.719904	4.29739e-32	0.0675599	0.00383325	0.00209703	0.805578
PPIA	0	0	0	0	0.0495182	0.842964	0.71813	3.84437e-32	0.0675948	-0.0151566	0.00829269	0.805578
AFAP1L2	0	0	0	0	0.0488828	0.847807	0.72807	4.73628e-32	0.0676381	0.0017184	0.000940339	0.805578
SCO1	0	0	0	0	0.049078	0.833036	0.725628	4.80032e-32	0.067779	-0.00308413	0.00168856	0.805578
BIK	0	0	0	0	0.0488591	0.83341	0.723588	4.06365e-32	0.0677973	0.00279775	0.00153187	0.805578
C20orf196	0	0	0	0	0.0498879	0.833975	0.72027	4.46647e-32	0.0679385	0.00668744	0.00366349	0.805578
SRL	0	0	0	0	0.0505321	0.838458	0.720916	4.02419e-32	0.0679491	-0.00274342	0.00150295	0.805578
HSPA1A	0	0	0	0	0.0495052	0.836592	0.725085	3.48025e-32	0.0679542	-0.00345894	0.00189497	0.805578
EIF1AD	0	0	0	0	0.0491985	0.834826	0.72446	3.68122e-32	0.0679571	-0.00670941	0.00367578	0.805578
SCP2D1	0	0	0	0	0.050334	0.83645	0.711607	4.05137e-32	0.0679939	0.00333204	0.00182572	0.805578
PLTP	0	0	0	0	0.0500632	0.828261	0.724272	3.14396e-32	0.0679957	-0.00158835	0.000870305	0.805578
POLR3G	0	0	0	0	0.0483666	0.833031	0.722959	4.57761e-32	0.0681409	0.00356029	0.00195182	0.805578
ARHGEF25	0	0	0	0	0.0488801	0.833169	0.721861	4.68452e-32	0.0682122	-0.00211106	0.00115762	0.805578
ADAMTS13	0	0	0	0	0.0497486	0.841434	0.721329	2.92913e-32	0.0682483	-0.00137301	0.000753006	0.805578
GDE1	0	0	0	0	0.0491005	0.841775	0.726918	3.66302e-32	0.0682642	-0.00359771	0.00197321	0.805578
SERPINA6	0	0	0	0	0.0485188	0.840065	0.724921	3.57296e-32	0.0682979	-0.00300629	0.00164905	0.805578
ENSA	0	0	0	0	0.0488173	0.839164	0.726862	4.35821e-32	0.0684618	-0.0081974	0.0044992	0.805578
AQP11	0	0	0	0	0.04911	0.83366	0.72655	5.01871e-32	0.068483	-0.00311803	0.00171148	0.805578
LPCAT3	0	0	0	0	0.0499871	0.833302	0.721087	3.7451e-32	0.06854	0.00358419	0.00196776	0.805578
CATSPER1	0	0	0	0	0.0488939	0.831747	0.726984	4.47659e-32	0.0685857	-0.00328345	0.00180295	0.805578
PHC1	0	0	0	0	0.0496461	0.834785	0.726849	4.43105e-32	0.0686408	0.00241075	0.00132402	0.805578
ATRX	0	0	0	0	0.0482923	0.832001	0.719917	4.11305e-32	0.0686427	0.00398908	0.00219087	0.805578
SLC6A18	0	0	0	0	0.0492845	0.839013	0.724151	3.72905e-32	0.0686629	-0.00132877	0.000729834	0.805578
AGAP5	0	0	0	0	0.0490666	0.839068	0.721686	3.44054e-32	0.0687512	0.00330926	0.00181821	0.805578
CACNB2	0	0	0	0	0.0496755	0.830814	0.728423	3.51869e-32	0.0689141	0.00122457	0.000673212	0.805578
VDAC2	0	0	0	0	0.0486278	0.840028	0.72959	3.92036e-32	0.0689312	-0.00569664	0.00313194	0.805578
RENBP	0	0	0	0	0.0501275	0.835876	0.727718	4.90477e-32	0.0689538	-0.00374509	0.00205917	0.805578
MTIF2	0	0	0	0	0.0502791	0.833006	0.717235	3.91265e-32	0.0690384	0.00165203	0.000908617	0.805578
INSL4	0	0	0	0	0.0487952	0.838936	0.725102	4.13801e-32	0.0690559	-0.0109835	0.00604131	0.805578
PAG1	0	0	0	0	0.0503275	0.845241	0.724896	3.74866e-32	0.06906	0.00276675	0.00152183	0.805578
GP6	0	0	0	0	0.0495136	0.835683	0.720583	4.4549e-32	0.0691035	0.00237954	0.00130905	0.805578
TOP2B	0	0	0	0	0.0490058	0.83014	0.730043	4.04407e-32	0.0691168	0.00186056	0.0010236	0.805578
DNAI1	0	0	0	0	0.0489882	0.831785	0.725386	3.97232e-32	0.0691272	-0.00170124	0.000935979	0.805578
POLR2J3	0	0	0	0	0.0491996	0.834571	0.726229	3.27949e-32	0.0692013	-0.00596061	0.00328026	0.805578
RFWD3	0	0	0	0	0.0498726	0.832755	0.722051	3.73379e-32	0.0692717	-0.00277875	0.0015296	0.805578
BEND5	0	0	0	0	0.0486417	0.836676	0.720296	3.39686e-32	0.0693147	0.00287485	0.00158274	0.805578
TMEM190	0	0	0	0	0.0493345	0.839698	0.718639	3.74021e-32	0.069332	0.0030688	0.00168962	0.805578
NFE2	0	0	0	0	0.0491596	0.835166	0.719839	4.08679e-32	0.0693393	0.00239648	0.00131949	0.805578
TOR4A	0	0	0	0	0.0497677	0.841172	0.728553	4.03195e-32	0.0694016	0.00522756	0.00287891	0.805578
MOSPD2	0	0	0	0	0.0489806	0.832852	0.723226	4.02386e-32	0.0694026	-0.00756368	0.00416548	0.805578
BAZ1A	0	0	0	0	0.0492447	0.837158	0.721334	4.0572e-32	0.0694104	0.00260571	0.00143506	0.805578
SLC38A11	0	0	0	0	0.0494886	0.834037	0.720624	3.65682e-32	0.0694359	0.00178547	0.000983413	0.805578
LRRN2	0	0	0	0	0.0503376	0.835876	0.722366	4.19415e-32	0.0694461	0.00212034	0.0011679	0.805578
DYNC1I2	0	0	0	0	0.0493588	0.835843	0.732177	4.41776e-32	0.0694592	-0.00317484	0.0017488	0.805578
FOXE3	0	0	0	0	0.0500134	0.844394	0.720356	3.5805e-32	0.0694694	-0.00326925	0.00180087	0.805578
KRTCAP3	0	0	0	0	0.049681	0.83036	0.721932	3.7077e-32	0.0695284	-0.00263777	0.00145333	0.805578
STXBP5	0	0	0	0	0.0493276	0.840946	0.723029	4.61953e-32	0.0695756	0.00195208	0.00107572	0.805578
SOST	0	0	0	0	0.0493303	0.832724	0.728977	4.07904e-32	0.0695774	-0.00453443	0.00249877	0.805578
IGF1R	0	0	0	0	0.0489988	0.844577	0.723058	4.64138e-32	0.0696004	0.0016358	0.000901506	0.805578
P2RY11	0	0	0	0	0.0491753	0.830221	0.721074	3.37794e-32	0.0696684	0.0282618	0.0155792	0.805578
GFAP	0	0	0	0	0.0510485	0.83771	0.727336	3.90948e-32	0.0697428	-0.00195455	0.00107772	0.805578
MYO15A	0	0	0	0	0.0498863	0.836592	0.721914	5.16735e-32	0.0697609	0.000743165	0.000409802	0.805578
OR6C68	0	0	0	0	0.0494538	0.843777	0.7249	3.76706e-32	0.0698562	-0.00224954	0.00124088	0.805578
ATP2B1	0	0	0	0	0.049747	0.827173	0.724852	4.26001e-32	0.0698801	0.0025733	0.00141959	0.805578
CXADR	0	0	0	0	0.0503066	0.835121	0.726285	3.41833e-32	0.0698804	0.0036886	0.00203486	0.805578
ASNS	0	0	0	0	0.0496271	0.843691	0.721663	3.99182e-32	0.0699314	-0.00250691	0.00138323	0.805578
PGBD2	0	0	0	0	0.049845	0.830821	0.726284	3.77383e-32	0.0699389	-0.0038708	0.00213582	0.805578
POLR3F	0	0	0	0	0.0500598	0.834637	0.720378	4.05974e-32	0.0700743	0.00514739	0.00284159	0.805953
RPS12	0	0	0	0	0.0493532	0.833673	0.721862	3.92745e-32	0.0700888	-0.00453658	0.00250453	0.805953
GNB2	0	0	0	0	0.0498762	0.837783	0.714779	3.82926e-32	0.0701417	-0.00495561	0.00273638	0.805953
RTL10	0	0	0	0	0.0503669	0.835433	0.723999	3.48453e-32	0.0701606	-0.00254342	0.00140452	0.805953
MAP3K5	0	0	0	0	0.0495816	0.839756	0.727862	4.47981e-32	0.0702101	0.00255323	0.00141018	0.805953
SEC14L4	0	0	0	0	0.0493678	0.835055	0.723216	3.61587e-32	0.0702327	-0.0021231	0.00117271	0.805953
ACTL7B	0	0	0	0	0.0497001	0.837137	0.717056	3.8594e-32	0.0703508	0.00257113	0.00142078	0.805953
ERICH4	0	0	0	0	0.0494003	0.829317	0.719665	3.23937e-32	0.0704	0.00240569	0.00132959	0.805953
FAM26F	0	0	0	0	0.049789	0.836496	0.721412	3.72023e-32	0.0704211	-0.00277331	0.00153289	0.805953
ZNF608	0	0	0	0	0.0490233	0.831579	0.730201	3.80867e-32	0.0704436	0.00162764	0.000899713	0.805953
CDC7	0	0	0	0	0.0498022	0.836112	0.724201	4.09407e-32	0.0704492	-0.00191189	0.00105686	0.805953
ZNF432	0	0	0	0	0.0491585	0.834536	0.720123	4.49845e-32	0.0706276	0.00108656	0.000601014	0.806646
AGA	0	0	0	0	0.0491509	0.838543	0.726803	3.67745e-32	0.0706596	-0.0026286	0.00145414	0.806646
PADI2	0	0	0	0	0.0495409	0.833777	0.726504	5.3881e-32	0.0706854	0.000845418	0.000467726	0.806646
PIK3R2	0	0	0	0	0.0489111	0.834028	0.727365	4.42858e-32	0.0707046	0.00233157	0.00129002	0.806646
SMIM8	0	0	0	0	0.0493232	0.843263	0.727913	4.58627e-32	0.0707436	0.00244683	0.00135399	0.806646
SCARA5	0	0	0	0	0.049139	0.833283	0.729885	3.74902e-32	0.0707706	0.00235311	0.00130225	0.806646
INSRR	0	0	0	0	0.0499139	0.839376	0.724954	4.08184e-32	0.0708404	-0.0010424	0.000577022	0.806823
BGN	0	0	0	0	0.0491826	0.839905	0.729055	3.91676e-32	0.0708732	0.00511101	0.00282954	0.806823
PYCARD	0	0	0	0	0.0497648	0.832836	0.722292	4.57575e-32	0.0709263	0.00519987	0.00287928	0.806933
SYNJ2BP	0	0	0	0	0.0502692	0.833101	0.715067	4.10719e-32	0.0710092	0.00946459	0.00524229	0.807381
PAPLN	0	0	0	0	0.0501822	0.839405	0.728097	3.59473e-32	0.07111	-0.000807526	0.000447436	0.808033
TBC1D22A	0	0	0	0	0.0499341	0.837842	0.723554	3.92089e-32	0.0712549	0.00210668	0.00116787	0.809106
ZNF717	0	0	0	0	0.0491882	0.843466	0.727086	4.44185e-32	0.0712917	0.00168968	0.000936825	0.809106
OR10H4	0	0	0	0	0.0499425	0.837253	0.719439	4.09976e-32	0.0714215	-0.00348822	0.00193489	0.809495
GIGYF1	0	0	0	0	0.0499377	0.834403	0.722232	3.43752e-32	0.0714666	-0.0015781	0.000875497	0.809495
SIX3	0	0	0	0	0.0492725	0.835671	0.726552	3.60017e-32	0.0715326	0.00449592	0.00249483	0.809495
MFSD2B	0	0	0	0	0.050599	0.836382	0.722117	4.21971e-32	0.0715409	0.00161926	0.000898568	0.809495
RIIAD1	0	0	0	0	0.0484946	0.835887	0.719951	4.06248e-32	0.071544	-0.00529239	0.00293692	0.809495
GRIK5	0	0	0	0	0.0500048	0.832732	0.717161	3.14846e-32	0.0715947	-0.00149842	0.00083167	0.809574
ZPBP	0	0	0	0	0.049726	0.836327	0.720614	4.14286e-32	0.071874	0.00232656	0.00129258	0.811987
IQSEC2	0	0	0	0	0.0487472	0.838968	0.726955	4.03903e-32	0.0718956	-0.00442957	0.00246116	0.811987
SSX3	0	0	0	0	0.0500304	0.838448	0.72178	4.04735e-32	0.07195	0.0121008	0.00672471	0.812107
DNAJC11	0	0	0	0	0.0499673	0.839174	0.715486	4.25647e-32	0.0720142	0.00277377	0.00154181	0.812337
PSMD8	0	0	0	0	0.0491944	0.832123	0.729722	3.76081e-32	0.0720701	-0.00259075	0.00144036	0.812474
COX7C	0	0	0	0	0.0494167	0.840466	0.722083	3.84476e-32	0.0721349	0.0157661	0.00876732	0.812688
CFD	0	0	0	0	0.0491722	0.840526	0.723299	3.98563e-32	0.072227	0.00262915	0.00146251	0.812688
KAT5	0	0	0	0	0.0495733	0.831564	0.728412	3.60032e-32	0.0722469	-0.00527717	0.00293572	0.812688
ASTN1	0	0	0	0	0.0498203	0.837481	0.71986	5.08057e-32	0.0722642	0.00125503	0.000698222	0.812688
HOXB6	0	0	0	0	0.050607	0.840654	0.726825	3.88137e-32	0.0723148	-0.00488191	0.00271648	0.812765
WDR73	0	0	0	0	0.0501838	0.837971	0.724322	4.41481e-32	0.0723829	0.0034549	0.0019229	0.81298
TRAF7	0	0	0	0	0.0493568	0.833016	0.718028	3.89334e-32	0.0724702	-0.00358689	0.00199697	0.81298
MIGA1	0	0	0	0	0.0496185	0.834236	0.731472	3.00374e-32	0.0724765	0.00252205	0.00140416	0.81298
SLC35F3	0	0	0	0	0.0492343	0.835061	0.717803	3.43999e-32	0.072513	-0.00337975	0.00188193	0.81298
HSPB1	0	0	0	0	0.0490855	0.837041	0.725772	5.01551e-32	0.0725531	-0.00309583	0.00172408	0.81298
TGIF1	0	0	0	0	0.0493453	0.838158	0.722426	3.61949e-32	0.0726282	0.00466054	0.00259615	0.813331
EFCAB11	0	0	0	0	0.0498308	0.836876	0.726628	4.27747e-32	0.072725	0.00506344	0.00282154	0.813528
MMP2	0	0	0	0	0.0490503	0.835171	0.724412	3.7784e-32	0.0727335	0.00189364	0.00105524	0.813528
HIC2	0	0	0	0	0.0493049	0.836199	0.718788	3.98655e-32	0.0728037	0.00345385	0.00192514	0.813822
AIRE	0	0	0	0	0.0490215	0.836363	0.727597	4.90651e-32	0.0729056	-0.00186586	0.00104038	0.814471
ACTG1	0	0	0	0	0.0501196	0.832071	0.73182	3.63128e-32	0.0730589	-0.0116736	0.00651255	0.815692
TTC23	0	0	0	0	0.0495655	0.833626	0.72024	4.51143e-32	0.0731685	0.0032098	0.00179139	0.815711
PIFO	0	0	0	0	0.0490784	0.831204	0.72156	3.41736e-32	0.0731916	-0.00466646	0.00260457	0.815711
CCDC102A	0	0	0	0	0.0495985	0.838654	0.725037	4.06317e-32	0.0732477	0.00164048	0.000915805	0.815711
FAM162A	0	0	0	0	0.0510127	0.843681	0.722153	3.86908e-32	0.0732538	-0.00275032	0.00153541	0.815711
RAB28	0	0	0	0	0.0491545	0.838572	0.720064	3.37728e-32	0.0733004	-0.00636915	0.00355626	0.815711
LRTM2	0	0	0	0	0.0491705	0.841556	0.727021	3.67986e-32	0.0733243	-0.00313304	0.0017495	0.815711
PGBD5	0	0	0	0	0.0511282	0.835058	0.723793	4.21557e-32	0.0734437	-0.00167135	0.000933674	0.815744
VNN3	0	0	0	0	0.0494234	0.841212	0.72043	4.10326e-32	0.0735557	0.0588202	0.0328718	0.815744
PCDHB14	0	0	0	0	0.0481912	0.835706	0.728233	3.96848e-32	0.0736082	0.0024625	0.00137642	0.815744
FAM213B	0	0	0	0	0.0493026	0.842575	0.719567	3.79893e-32	0.0736446	-0.00509369	0.0028475	0.815744
CACNA1C	0	0	0	0	0.0497182	0.829578	0.725207	4.48212e-32	0.0736448	0.00122426	0.000684393	0.815744
ENPP7	0	0	0	0	0.0500658	0.835723	0.725212	3.72549e-32	0.0736502	0.00138544	0.000774512	0.815744
CMIP	0	0	0	0	0.0495246	0.837836	0.730417	4.35032e-32	0.0737069	0.00294383	0.00164603	0.815744
PAGE4	0	0	0	0	0.0494398	0.841367	0.72208	3.56478e-32	0.0737323	0.0556229	0.031104	0.815744
OR5B17	0	0	0	0	0.0489482	0.833626	0.723105	4.07866e-32	0.0739784	-0.00332309	0.00185984	0.815744
CAV2	0	0	0	0	0.0495813	0.836307	0.725062	4.09851e-32	0.0740046	-0.00492389	0.00275601	0.815744
ARPC4	0	0	0	0	0.0494864	0.840693	0.72551	3.81815e-32	0.0740559	-0.0224782	0.0125838	0.815744
TRIM13	0	0	0	0	0.0497337	0.835148	0.720825	3.85574e-32	0.0740567	0.0042953	0.00240461	0.815744
CALU	0	0	0	0	0.0488973	0.838359	0.717275	3.94409e-32	0.0741028	0.00399685	0.00223789	0.815744
MEI4	0	0	0	0	0.0503643	0.835105	0.723943	4.43799e-32	0.07419	-0.00315384	0.00176641	0.815744
ZBTB44	0	0	0	0	0.049145	0.833941	0.727632	4.09996e-32	0.074218	-0.00393722	0.00220538	0.815744
TARDBP	0	0	0	0	0.0492983	0.840688	0.722127	4.05405e-32	0.0742565	0.00704476	0.00394655	0.815744
EFR3A	0	0	0	0	0.0502919	0.83526	0.718956	4.29022e-32	0.0742672	0.00223727	0.00125339	0.815744
KLK3	0	0	0	0	0.0488859	0.837503	0.721738	3.9091e-32	0.0743077	-0.00304037	0.00170355	0.815744
TRIB2	0	0	0	0	0.0491285	0.833905	0.722512	4.03795e-32	0.0743323	0.00477177	0.0026739	0.815744
RGL2	0	0	0	0	0.0497911	0.834274	0.725918	3.70327e-32	0.0744864	0.00234997	0.00131752	0.815744
PSKH1	0	0	0	0	0.0492217	0.846156	0.725314	3.09498e-32	0.0744901	-0.00293849	0.0016475	0.815744
HSP90AB1	0	0	0	0	0.0491113	0.83577	0.72448	4.24962e-32	0.0745051	0.0027109	0.00151998	0.815744
FOPNL	0	0	0	0	0.0494946	0.836668	0.722539	3.79272e-32	0.0745392	-0.00357316	0.00200368	0.815744
WNK1	0	0	0	0	0.0492723	0.831378	0.724793	3.61552e-32	0.0745588	-0.00175717	0.000985415	0.815744
SLC10A2	0	0	0	0	0.0502513	0.837763	0.722424	3.89937e-32	0.0746856	0.001291	0.0007243	0.815744
PRRG2	0	0	0	0	0.0498585	0.831638	0.728656	3.55761e-32	0.0747004	-0.00268869	0.00150854	0.815744
FLYWCH1	0	0	0	0	0.0487789	0.832693	0.72761	5.408e-32	0.0747752	0.0010929	0.000613347	0.815744
SLC22A7	0	0	0	0	0.0485942	0.832418	0.725683	4.02272e-32	0.0748411	-0.00189967	0.00106636	0.815744
CXorf57	0	0	0	0	0.0484294	0.83574	0.72906	3.95275e-32	0.0748427	0.00517527	0.0029051	0.815744
CRY1	0	0	0	0	0.0483902	0.828744	0.721369	4.46554e-32	0.0748557	-0.00305268	0.00171368	0.815744
OR2T3	0	0	0	0	0.0513281	0.831446	0.720899	4.42585e-32	0.0748577	-0.00228334	0.0012818	0.815744
ADORA2B	0	0	0	0	0.0494639	0.832985	0.723766	3.77827e-32	0.0748731	-0.00209973	0.00117879	0.815744
FHL5	0	0	0	0	0.0497317	0.829857	0.721496	4.10705e-32	0.0748819	0.00368106	0.00206662	0.815744
PRKCQ	0	0	0	0	0.0490575	0.834034	0.722605	4.05055e-32	0.0749312	-0.00308375	0.00173157	0.815744
RXRB	0	0	0	0	0.0500868	0.844545	0.720378	3.98878e-32	0.0749429	-0.00457405	0.0025685	0.815744
L3MBTL4	0	0	0	0	0.0485972	0.838454	0.722009	4.10654e-32	0.075001	-0.00184467	0.00103606	0.815744
PHTF2	0	0	0	0	0.0499151	0.836016	0.726877	4.90598e-32	0.0751266	0.00168318	0.000945766	0.815744
HSPA12B	0	0	0	0	0.0507414	0.833353	0.724637	3.85657e-32	0.0751417	-0.00193539	0.00108753	0.815744
HTR3E	0	0	0	0	0.0498082	0.83644	0.719335	3.84597e-32	0.0751999	-0.00314879	0.00176972	0.815744
RALGDS	0	0	0	0	0.0484639	0.834124	0.715634	4.12267e-32	0.0752213	0.00178856	0.0010053	0.815744
AGBL2	0	0	0	0	0.0497632	0.833053	0.727512	4.55692e-32	0.0752928	-0.00228766	0.00128615	0.815744
2011-09-01	0	0	0	0	0.0494424	0.823446	0.724045	4.34662e-32	0.075433	0.00459923	0.00258698	0.815744
IL13RA1	0	0	0	0	0.0493866	0.838853	0.725755	3.74646e-32	0.0754365	0.00808032	0.00454509	0.815744
THOC6	0	0	0	0	0.0500332	0.836123	0.719161	3.90331e-32	0.0754515	0.00199566	0.00112259	0.815744
NEURL4	0	0	0	0	0.0495402	0.830901	0.726718	4.18652e-32	0.0754886	0.00127609	0.000717914	0.815744
TNFRSF1A	0	0	0	0	0.0499785	0.828826	0.724438	4.38647e-32	0.0754928	0.00517365	0.00291068	0.815744
RGS22	0	0	0	0	0.0488447	0.835134	0.721242	3.28223e-32	0.0755012	0.00126144	0.000709705	0.815744
CD1C	0	0	0	0	0.0500539	0.838382	0.720497	3.90247e-32	0.0755289	-0.00277368	0.00156065	0.815744
ACOT2	0	0	0	0	0.0494975	0.833381	0.719042	3.77415e-32	0.0756034	0.0032319	0.00181895	0.815744
UBE2D1	0	0	0	0	0.0494363	0.832272	0.72211	4.03675e-32	0.0756045	-0.0102989	0.00579632	0.815744
AP3B2	0	0	0	0	0.0490789	0.833616	0.732765	3.67133e-32	0.075657	-0.00251697	0.00141684	0.815744
PLXNB2	0	0	0	0	0.0497193	0.831243	0.725647	3.49543e-32	0.0757015	-0.00110226	0.000620571	0.815744
MRPL3	0	0	0	0	0.0500902	0.828408	0.725655	4.30627e-32	0.0757117	0.00170767	0.000961452	0.815744
LRRC2	0	0	0	0	0.0489523	0.835167	0.721184	3.3384e-32	0.0757403	0.00259951	0.00146371	0.815744
RPL3L	0	0	0	0	0.0495973	0.837544	0.724998	3.92988e-32	0.0757451	0.00118354	0.000666428	0.815744
ITGAV	0	0	0	0	0.0498519	0.837486	0.727165	3.56556e-32	0.0758795	-0.00205314	0.00115662	0.816717
SDCBP	0	0	0	0	0.0498869	0.832518	0.726795	3.91948e-32	0.0759547	0.00375191	0.00211415	0.817052
HNF4A	0	0	0	0	0.0482613	0.837377	0.727319	4.3453e-32	0.0760369	0.00241383	0.00136054	0.817059
PAPOLA	0	0	0	0	0.0483766	0.834913	0.725874	3.53127e-32	0.0760434	0.00649303	0.00365983	0.817059
IQSEC3	0	0	0	0	0.0497528	0.83212	0.726218	3.30871e-32	0.0762075	-0.00117558	0.000662994	0.818349
ARL4A	0	0	0	0	0.0494257	0.828345	0.720016	3.45352e-32	0.0763263	-0.00770684	0.00434819	0.818624
RGS2	0	0	0	0	0.0494156	0.830827	0.72225	4.26884e-32	0.0763445	0.00371676	0.00209712	0.818624
DHX32	0	0	0	0	0.0485449	0.833348	0.726299	3.31518e-32	0.0764611	-0.00208772	0.00117843	0.818624
COL23A1	0	0	0	0	0.0495552	0.829513	0.729295	3.84853e-32	0.0765355	0.00183883	0.00103821	0.818624
MORN5	0	0	0	0	0.0491058	0.839086	0.725374	4.11443e-32	0.0765834	-0.00310296	0.00175222	0.818624
THRAP3	0	0	0	0	0.0496985	0.837179	0.723371	3.97942e-32	0.0765984	0.00195892	0.00110624	0.818624
ZBTB20	0	0	0	0	0.049396	0.833154	0.716675	2.6792e-32	0.0766376	0.00246644	0.00139304	0.818624
AMPH	0	0	0	0	0.0500108	0.835995	0.722378	4.61655e-32	0.0766534	0.00144036	0.000813553	0.818624
ZC3H12A	0	0	0	0	0.0499919	0.838954	0.720888	3.29443e-32	0.0767603	-0.00226964	0.00128242	0.818624
BCL9	0	0	0	0	0.0499665	0.833489	0.72268	4.49817e-32	0.0768194	0.00123858	0.000699976	0.818624
MARS	0	0	0	0	0.0491944	0.829761	0.727227	4.07656e-32	0.0768784	0.00148682	0.000840434	0.818624
ZXDC	0	0	0	0	0.0499343	0.838766	0.721043	3.70278e-32	0.0769957	0.00238612	0.00134931	0.818624
PDE9A	0	0	0	0	0.0495357	0.837543	0.721944	3.57981e-32	0.0770206	-0.00244117	0.00138055	0.818624
ZFYVE28	0	0	0	0	0.0494171	0.833843	0.727361	4.01032e-32	0.0771046	-0.00177657	0.00100499	0.818624
IFNGR1	0	0	0	0	0.0489082	0.835358	0.721061	4.47045e-32	0.0771497	0.00534617	0.00302474	0.818624
AVL9	0	0	0	0	0.0497418	0.833076	0.723773	4.03427e-32	0.0772463	0.00223631	0.00126567	0.818624
SSMEM1	0	0	0	0	0.0494385	0.834142	0.722877	4.05334e-32	0.0772478	0.00475322	0.00269015	0.818624
THBS1	0	0	0	0	0.0501127	0.834355	0.720645	3.69707e-32	0.0772733	-0.0017257	0.000976767	0.818624
BYSL	0	0	0	0	0.0506111	0.836843	0.72629	3.34889e-32	0.0773061	-0.00130651	0.000739586	0.818624
TCAP	0	0	0	0	0.0484385	0.836117	0.725336	4.01087e-32	0.0773072	0.00142009	0.000803882	0.818624
SKI	0	0	0	0	0.0500488	0.833128	0.72661	4.46074e-32	0.0773087	-0.00271896	0.00153915	0.818624
BCS1L	0	0	0	0	0.0495412	0.828181	0.728556	4.10772e-32	0.0773208	0.00236482	0.00133873	0.818624
PRELID2	0	0	0	0	0.0493371	0.829357	0.722548	3.99928e-32	0.0773586	0.00384833	0.00217884	0.818624
ITPK1	0	0	0	0	0.0506202	0.832344	0.720177	4.21088e-32	0.0773985	-0.00221389	0.00125362	0.818624
EDEM1	0	0	0	0	0.0491585	0.83275	0.722597	4.33476e-32	0.0774198	0.00204508	0.00115811	0.818624
NOTO	0	0	0	0	0.0498258	0.837477	0.724553	3.42887e-32	0.0774447	0.00311623	0.00176485	0.818624
PCDHGB3	0	0	0	0	0.0490064	0.839174	0.723991	3.7335e-32	0.077468	0.00161249	0.000913289	0.818624
HYAL3	0	0	0	0	0.0505244	0.831939	0.730694	3.98465e-32	0.0776354	-0.00177931	0.00100834	0.818624
TMEM154	0	0	0	0	0.0491745	0.832573	0.71957	3.70978e-32	0.0776357	0.00348705	0.00197613	0.818624
LRP5L	0	0	0	0	0.0487859	0.838566	0.719261	3.54697e-32	0.0776997	-0.00222389	0.00126056	0.818624
SCAF1	0	0	0	0	0.050081	0.83253	0.727481	4.0424e-32	0.0777943	-0.001465	0.000830665	0.818624
EPN2	0	0	0	0	0.0502298	0.835303	0.724549	4.38385e-32	0.0778082	-0.00229172	0.00129949	0.818624
UTP14A	0	0	0	0	0.0485953	0.840689	0.724412	4.23962e-32	0.0778764	0.00240398	0.00136345	0.818624
B3GALNT2	0	0	0	0	0.0496568	0.830169	0.719722	3.58605e-32	0.0779758	-0.00188929	0.0010719	0.818624
ENC1	0	0	0	0	0.0496206	0.833511	0.723694	3.88716e-32	0.0780045	0.00451203	0.00256017	0.818624
MEF2A	0	0	0	0	0.0492251	0.835434	0.727261	3.94877e-32	0.078103	-0.00212582	0.00120661	0.818624
DLST	0	0	0	0	0.0492264	0.830427	0.725654	3.57563e-32	0.0781481	0.00273749	0.00155403	0.818624
CRISP2	0	0	0	0	0.049296	0.831164	0.727209	3.92747e-32	0.0781753	0.00511949	0.00290651	0.818624
CYB5R2	0	0	0	0	0.0495449	0.829115	0.723304	5.01504e-32	0.0781968	-0.0038409	0.00218077	0.818624
NPC1	0	0	0	0	0.0495493	0.830043	0.725098	3.97733e-32	0.0782187	0.00161141	0.000914985	0.818624
SLC37A4	0	0	0	0	0.0502652	0.835111	0.727553	3.50301e-32	0.0782954	-0.00163529	0.000928787	0.818624
GRSF1	0	0	0	0	0.0496777	0.834663	0.722126	4.61427e-32	0.0783381	0.0027424	0.00155781	0.818624
CREB3L3	0	0	0	0	0.0492924	0.835577	0.723199	3.89898e-32	0.0783552	0.00220908	0.00125493	0.818624
HOXD8	0	0	0	0	0.0494701	0.8331	0.724278	3.59217e-32	0.0783577	0.00208254	0.00118306	0.818624
PADI6	0	0	0	0	0.048958	0.833066	0.720046	3.68826e-32	0.0784119	0.00746821	0.00424333	0.818624
KDM2B	0	0	0	0	0.0503029	0.833652	0.716231	3.83264e-32	0.07845	0.00215693	0.00122569	0.818624
B9D1	0	0	0	0	0.0497666	0.833864	0.724467	3.95913e-32	0.0784802	0.00327728	0.00186253	0.818624
SLC25A21	0	0	0	0	0.0496279	0.833447	0.720355	3.7409e-32	0.0785483	-0.001889	0.0010738	0.818624
FZD8	0	0	0	0	0.0495187	0.844	0.725702	4.55219e-32	0.0785516	0.0041075	0.00233491	0.818624
MSLN	0	0	0	0	0.0491376	0.832082	0.725229	4.08684e-32	0.0785741	-0.00217638	0.00123726	0.818624
PTPRN	0	0	0	0	0.0492769	0.837004	0.721985	3.92252e-32	0.0786567	0.00175924	0.0010004	0.818624
ZNF211	0	0	0	0	0.0499815	0.831404	0.722811	3.00129e-32	0.0786632	-0.0010604	0.000603012	0.818624
KANK2	0	0	0	0	0.0493883	0.836095	0.726957	3.26663e-32	0.0787841	-0.00103878	0.000590954	0.818624
LRCH3	0	0	0	0	0.048791	0.835728	0.721622	3.64703e-32	0.0788881	0.00135132	0.000769025	0.818624
SLCO1A2	0	0	0	0	0.0496001	0.834681	0.72543	3.20405e-32	0.078915	-0.00220496	0.00125494	0.818624
IL21R	0	0	0	0	0.0493198	0.842301	0.717611	3.7292e-32	0.07897	0.00371266	0.00211342	0.818624
NPY5R	0	0	0	0	0.0492996	0.841942	0.723796	4.14687e-32	0.0790145	-0.0034664	0.00197353	0.818624
OR1Q1	0	0	0	0	0.0496901	0.839609	0.721304	3.3792e-32	0.0790516	-0.00295225	0.00168102	0.818624
GLIS3	0	0	0	0	0.0492201	0.832574	0.729448	4.14352e-32	0.0790769	0.000991022	0.000564338	0.818624
RMND5B	0	0	0	0	0.0495216	0.833535	0.717699	3.9246e-32	0.0791378	0.0014484	0.000824958	0.818624
CGREF1	0	0	0	0	0.0489227	0.839938	0.72588	3.71481e-32	0.0791649	-0.00375664	0.00213985	0.818624
ARID1B	0	0	0	0	0.0493899	0.836765	0.728089	5.03858e-32	0.0792337	0.00133424	0.00076018	0.818624
LRRC45	0	0	0	0	0.0492151	0.837185	0.721742	4.9755e-32	0.0792623	0.00184629	0.00105202	0.818624
GSG1L	0	0	0	0	0.0490245	0.832445	0.735359	3.78774e-32	0.0793093	0.00201574	0.00114875	0.818624
FUT11	0	0	0	0	0.0496738	0.836386	0.722466	4.08313e-32	0.0793204	-0.00157512	0.000897682	0.818624
GNAZ	0	0	0	0	0.0489187	0.830987	0.725392	3.84589e-32	0.0793411	-0.00492453	0.00280674	0.818624
FADD	0	0	0	0	0.0493628	0.838402	0.727292	3.88827e-32	0.0793481	0.00733828	0.00418257	0.818624
MRGPRF	0	0	0	0	0.0492518	0.84655	0.723757	3.54029e-32	0.0793753	0.00177961	0.00101441	0.818624
CACNA1G	0	0	0	0	0.0494782	0.835487	0.723234	4.14872e-32	0.0793779	-0.00118896	0.000677732	0.818624
ACSBG2	0	0	0	0	0.048695	0.839812	0.722298	4.14644e-32	0.0793877	-0.0022281	0.0012701	0.818624
SHROOM1	0	0	0	0	0.0489667	0.834956	0.720773	4.65598e-32	0.0794173	0.00154284	0.000879569	0.818624
SPATA24	0	0	0	0	0.0501788	0.832177	0.725298	4.47921e-32	0.0794486	0.00217697	0.00124121	0.818624
FBXO8	0	0	0	0	0.049123	0.83205	0.72373	4.10884e-32	0.0794537	0.00487489	0.00277949	0.818624
SLC2A4	0	0	0	0	0.0492579	0.839774	0.719697	3.17435e-32	0.0795477	0.00165305	0.000942807	0.819085
PER3	0	0	0	0	0.0485348	0.829475	0.723053	5.52369e-32	0.0795867	0.00129079	0.000736288	0.819085
KCNK9	0	0	0	0	0.0495185	0.836084	0.72401	3.75386e-32	0.0797287	0.00831771	0.00474681	0.820092
SERPINE1	0	0	0	0	0.0489666	0.844897	0.724431	4.68244e-32	0.0798114	-0.00357613	0.00204141	0.820488
DNAJC12	0	0	0	0	0.0492077	0.838831	0.725106	3.81617e-32	0.0798848	0.00369741	0.00211115	0.820788
DSG4	0	0	0	0	0.0500946	0.839468	0.723569	3.61526e-32	0.0799625	-0.00100163	0.000572059	0.821013
PDAP1	0	0	0	0	0.049986	0.843386	0.72392	3.54535e-32	0.0800664	-0.00295333	0.00168731	0.821013
ECHDC2	0	0	0	0	0.0500017	0.833135	0.717929	4.06019e-32	0.0801188	-0.00119883	0.00068504	0.821013
PTPN21	0	0	0	0	0.0488074	0.836675	0.725621	4.03852e-32	0.0801486	-0.00152497	0.000871492	0.821013
C2orf16	0	0	0	0	0.0483176	0.835724	0.726995	3.99529e-32	0.080212	0.00213069	0.0012179	0.821013
SUSD5	0	0	0	0	0.0493609	0.835665	0.723805	4.68215e-32	0.0802296	0.00198512	0.00113477	0.821013
TEX30	0	0	0	0	0.0483057	0.834155	0.724246	3.28484e-32	0.0802377	-0.00396828	0.00226847	0.821013
MRPS18A	0	0	0	0	0.0492912	0.836486	0.728452	3.98874e-32	0.0802607	0.00292026	0.00166949	0.821013
PDLIM4	0	0	0	0	0.04966	0.829864	0.725106	3.09798e-32	0.0804651	-0.00327955	0.00187617	0.822651
CTBP2	0	0	0	0	0.0499899	0.835233	0.727433	3.91e-32	0.080547	-0.00155003	0.000886981	0.823034
JAML	0	0	0	0	0.0493546	0.842449	0.730457	4.57185e-32	0.0807058	0.00174505	0.0009991	0.824203
RAD51AP2	0	0	0	0	0.0505996	0.838011	0.72629	4.39481e-32	0.0807816	0.00213245	0.00122121	0.824467
ANPEP	0	0	0	0	0.0499414	0.835686	0.722481	4.12055e-32	0.0808636	0.00155164	0.000888831	0.824467
DNMT1	0	0	0	0	0.0501307	0.836403	0.719812	4.0216e-32	0.0809501	-0.00221461	0.00126896	0.824467
UBE2R2	0	0	0	0	0.049671	0.830512	0.721821	4.02222e-32	0.0809847	-0.0105134	0.00602483	0.824467
ANO7	0	0	0	0	0.0495935	0.838837	0.719703	3.53778e-32	0.0811089	0.000951373	0.000545418	0.824467
FCGR2A	0	0	0	0	0.0495272	0.833404	0.72645	4.34045e-32	0.0811407	0.00316615	0.00181533	0.824467
SLC17A5	0	0	0	0	0.0488703	0.837078	0.723944	3.65929e-32	0.0811479	0.00197243	0.00113093	0.824467
TBCC	0	0	0	0	0.0493157	0.831914	0.728221	4.16624e-32	0.0811774	-0.00187516	0.00107526	0.824467
WAS	0	0	0	0	0.0483602	0.843992	0.720712	3.19128e-32	0.0811997	-0.00244229	0.00140057	0.824467
MCHR1	0	0	0	0	0.0503532	0.831328	0.726285	3.93294e-32	0.0812011	-0.00198537	0.00113855	0.824467
APEX1	0	0	0	0	0.0494424	0.8282	0.723238	3.89474e-32	0.0812204	0.00290573	0.00166645	0.824467
OAS1	0	0	0	0	0.0493989	0.835955	0.723924	3.98136e-32	0.0812753	0.00282433	0.00162006	0.824574
CCDC126	0	0	0	0	0.049949	0.837914	0.724578	4.17981e-32	0.0814305	-0.0106882	0.00613395	0.825696
HOXB7	0	0	0	0	0.0497811	0.837954	0.726165	5.31362e-32	0.0815355	-0.00162283	0.000931665	0.82631
AKT1	0	0	0	0	0.0496089	0.833283	0.724479	3.92962e-32	0.0817431	0.00412057	0.00236723	0.827318
SMOX	0	0	0	0	0.0503539	0.837877	0.729306	3.7545e-32	0.0817959	-0.0022609	0.00129909	0.827318
WDR93	0	0	0	0	0.0499739	0.840558	0.723426	4.62602e-32	0.082095	-0.00360488	0.00207335	0.827318
NSUN2	0	0	0	0	0.0494774	0.835097	0.724131	3.80853e-32	0.0822352	0.00153035	0.000880585	0.827318
TCP11L2	0	0	0	0	0.0495864	0.838832	0.723515	4.90981e-32	0.0822389	-0.00158047	0.000909436	0.827318
BRINP3	0	0	0	0	0.0494579	0.835871	0.728007	4.19072e-32	0.0823226	-0.00238574	0.00137319	0.827318
EPHA5	0	0	0	0	0.048711	0.834339	0.724137	3.73277e-32	0.0823451	-0.00187338	0.00107836	0.827318
AIPL1	0	0	0	0	0.0495559	0.837898	0.721858	3.60536e-32	0.0823477	-0.00122294	0.000703958	0.827318
LAMP3	0	0	0	0	0.0494983	0.829784	0.722847	3.53298e-32	0.0823568	-0.00424826	0.00244548	0.827318
LIPJ	0	0	0	0	0.0491113	0.833354	0.723578	4.73082e-32	0.0823646	-0.00172431	0.000992614	0.827318
RASL10A	0	0	0	0	0.0501426	0.839093	0.725732	4.08405e-32	0.0823724	0.00295134	0.00169901	0.827318
SHANK2	0	0	0	0	0.0485649	0.838526	0.722078	4.41447e-32	0.0823842	0.0013188	0.000759229	0.827318
WRN	0	0	0	0	0.0499539	0.836224	0.723582	4.95995e-32	0.0823981	0.000797156	0.00045894	0.827318
GTPBP10	0	0	0	0	0.0492363	0.830473	0.723846	3.66792e-32	0.0824507	0.00196832	0.0011334	0.827318
DEFA3	0	0	0	0	0.0493942	0.832356	0.723383	4.98568e-32	0.0825646	0.0121628	0.00700619	0.827318
USP26	0	0	0	0	0.048646	0.835686	0.718242	3.94179e-32	0.082572	0.00574311	0.00330831	0.827318
CDC25A	0	0	0	0	0.0492434	0.835112	0.720056	3.49386e-32	0.0826348	-0.00422878	0.00243648	0.827318
NFE2L2	0	0	0	0	0.0487275	0.845995	0.724086	4.67127e-32	0.0826505	-0.00308871	0.0017797	0.827318
DYDC1	0	0	0	0	0.0488395	0.83457	0.721166	4.51679e-32	0.082702	0.00494675	0.00285077	0.827318
CAMSAP1	0	0	0	0	0.0491826	0.836979	0.71943	3.0833e-32	0.0827188	-0.00127737	0.000736178	0.827318
NUDT19	0	0	0	0	0.0498678	0.838341	0.720252	4.22732e-32	0.0827497	0.00128752	0.000742101	0.827318
GPR180	0	0	0	0	0.0500913	0.834658	0.721341	4.00776e-32	0.0827646	-0.00177069	0.00102064	0.827318
MAPKAP1	0	0	0	0	0.0498183	0.833796	0.715915	3.35629e-32	0.0827743	0.00265241	0.00152892	0.827318
P3H1	0	0	0	0	0.0501337	0.83897	0.722537	3.50215e-32	0.082781	0.00103994	0.000599461	0.827318
ACTL9	0	0	0	0	0.0485175	0.837644	0.723038	4.22549e-32	0.0828031	0.00312863	0.0018036	0.827318
FAM71D	0	0	0	0	0.0489657	0.831237	0.726051	3.70956e-32	0.0828385	0.00344286	0.00198497	0.827318
FTO	0	0	0	0	0.0486041	0.839643	0.728117	4.06175e-32	0.0828388	-0.00187456	0.00108078	0.827318
NYAP1	0	0	0	0	0.0490085	0.834039	0.723224	4.27221e-32	0.082919	0.00125441	0.000723416	0.827434
ZNF7	0	0	0	0	0.0483588	0.836944	0.721668	3.54725e-32	0.0830646	-0.00303695	0.00175223	0.827434
ST7L	0	0	0	0	0.0497247	0.834083	0.729014	4.87059e-32	0.0830685	0.00137456	0.000793093	0.827434
CD28	0	0	0	0	0.0497874	0.838426	0.722893	3.62367e-32	0.0831523	0.00581697	0.00335718	0.827434
KHDRBS1	0	0	0	0	0.0486735	0.834948	0.727826	3.94444e-32	0.0831619	0.00515289	0.00297401	0.827434
ZNF219	0	0	0	0	0.0487366	0.8361	0.723438	3.21636e-32	0.0832041	-0.00263346	0.00152012	0.827434
P2RY12	0	0	0	0	0.0500089	0.832859	0.719187	3.92427e-32	0.0833268	0.00540787	0.00312284	0.827434
TBATA	0	0	0	0	0.0496591	0.835162	0.724242	4.07294e-32	0.0833352	0.00273069	0.00157692	0.827434
YWHAQ	0	0	0	0	0.0492418	0.841041	0.728088	4.45947e-32	0.083358	0.00742941	0.00429064	0.827434
PSD	0	0	0	0	0.0492765	0.834438	0.726191	4.10063e-32	0.0833723	0.00149706	0.000864627	0.827434
OR52E8	0	0	0	0	0.0492631	0.834079	0.724777	4.60513e-32	0.0834211	-0.00263738	0.00152345	0.827434
SUSD4	0	0	0	0	0.0490082	0.84026	0.731058	4.42478e-32	0.0834701	0.00207527	0.00119895	0.827434
NUTF2	0	0	0	0	0.0496657	0.83686	0.720753	3.74993e-32	0.0835304	0.0161631	0.00933973	0.827434
C11orf91	0	0	0	0	0.0498783	0.838712	0.720281	4.16566e-32	0.0835331	-0.00368413	0.00212887	0.827434
CYP4X1	0	0	0	0	0.0498845	0.83973	0.73066	4.20874e-32	0.0835478	-0.00329215	0.00190246	0.827434
ANKRD13A	0	0	0	0	0.0497025	0.839474	0.720094	3.78692e-32	0.0835676	-0.00192597	0.00111304	0.827434
ETV2	0	0	0	0	0.0491163	0.836254	0.719186	3.96974e-32	0.0836345	0.0027183	0.00157128	0.827434
ZMYM5	0	0	0	0	0.0492129	0.835035	0.72301	3.58988e-32	0.0836531	-0.00164472	0.000950769	0.827434
TMEM125	0	0	0	0	0.0495983	0.835954	0.722785	3.87083e-32	0.0837522	-0.00150229	0.00086871	0.827974
PLCZ1	0	0	0	0	0.0497682	0.838206	0.721006	3.77435e-32	0.0838974	-0.00279087	0.0016146	0.828039
ZNF627	0	0	0	0	0.0499756	0.837055	0.724941	4.14712e-32	0.0839287	-0.00322451	0.00186567	0.828039
CATSPERD	0	0	0	0	0.0498987	0.838963	0.719542	3.89172e-32	0.083991	0.00202658	0.00117279	0.828039
ANGPTL8	0	0	0	0	0.0496991	0.833333	0.724346	4.24557e-32	0.0840188	0.00248402	0.00143764	0.828039
FAM124B	0	0	0	0	0.0499078	0.838644	0.725046	4.83485e-32	0.0840255	-0.00328501	0.00190126	0.828039
CDC42BPB	0	0	0	0	0.0489672	0.827622	0.72403	4.72598e-32	0.0841468	0.00136237	0.000788805	0.828039
SOX7	0	0	0	0	0.0495684	0.840849	0.723214	4.20894e-32	0.08417	-0.00396121	0.00229369	0.828039
PCMT1	0	0	0	0	0.049038	0.835753	0.728683	4.2606e-32	0.0842017	-0.00568591	0.0032927	0.828039
MIXL1	0	0	0	0	0.0483799	0.835741	0.726288	3.51833e-32	0.0842036	-0.00274177	0.00158776	0.828039
COL5A3	0	0	0	0	0.0491193	0.835557	0.716623	4.07627e-32	0.0842051	-0.00130489	0.000755671	0.828039
AOC1	0	0	0	0	0.0494436	0.839038	0.726123	4.31044e-32	0.0843082	0.00199863	0.0011578	0.828614
STK17A	0	0	0	0	0.0498862	0.833947	0.721281	4.3175e-32	0.0844408	0.00336563	0.00195053	0.829478
HLA-DRA	0	0	0	0	0.0500455	0.832509	0.730699	3.79845e-32	0.0844946	0.00561231	0.00325315	0.829567
PACS2	0	0	0	0	0.0494851	0.838705	0.725533	3.28309e-32	0.0845585	-0.00183996	0.00106674	0.829646
DAGLB	0	0	0	0	0.0489774	0.83869	0.721966	3.78281e-32	0.084689	-0.000951231	0.000551721	0.829646
DBR1	0	0	0	0	0.0493207	0.831858	0.721134	3.41878e-32	0.084705	0.00202458	0.00117433	0.829646
NNT	0	0	0	0	0.0490875	0.836962	0.723244	3.64992e-32	0.0847073	0.00146164	0.000847814	0.829646
PCCB	0	0	0	0	0.049071	0.833896	0.721292	3.4787e-32	0.0847669	-0.00115191	0.000668282	0.829646
DLL4	0	0	0	0	0.0491468	0.838309	0.719643	4.00374e-32	0.0847709	-0.00230733	0.00133862	0.829646
COPRS	0	0	0	0	0.0491688	0.832874	0.727013	4.20047e-32	0.0848797	-0.00345749	0.0020066	0.829859
HIVEP2	0	0	0	0	0.0492904	0.84339	0.723362	4.56159e-32	0.0848911	0.00117013	0.000679124	0.829859
LYZL4	0	0	0	0	0.0497475	0.841296	0.72131	4.21727e-32	0.0849385	-0.00288796	0.00167638	0.829859
PRR22	0	0	0	0	0.0494372	0.831288	0.724408	3.69213e-32	0.0849715	0.00203646	0.00118223	0.829859
SMIM23	0	0	0	0	0.0504219	0.832343	0.728022	3.80909e-32	0.0851188	-0.0072091	0.0041871	0.830339
NOB1	0	0	0	0	0.0504766	0.837553	0.727332	3.32404e-32	0.0851219	-0.000905717	0.000526053	0.830339
SIRPD	0	0	0	0	0.0503213	0.834184	0.715503	3.4216e-32	0.0851775	0.00624779	0.00362945	0.830339
DNASE1L2	0	0	0	0	0.0496459	0.845993	0.721313	3.48315e-32	0.0852239	0.00148908	0.000865158	0.830339
METRN	0	0	0	0	0.0481109	0.839153	0.724529	4.38618e-32	0.0852842	0.00219524	0.00127569	0.830339
ZNF599	0	0	0	0	0.0489541	0.839792	0.72019	4.10801e-32	0.0853443	0.00128054	0.000744284	0.830339
SAE1	0	0	0	0	0.0493557	0.828217	0.722425	4.41809e-32	0.0853576	0.00369704	0.00214891	0.830339
HMGCS2	0	0	0	0	0.0499332	0.835261	0.725646	3.67372e-32	0.0854131	-0.00218571	0.00127068	0.830339
P4HA3	0	0	0	0	0.0497451	0.837269	0.722408	4.37736e-32	0.0854235	0.00187433	0.00108969	0.830339
NPY1R	0	0	0	0	0.0492493	0.834476	0.727734	4.03319e-32	0.0855249	-0.00338103	0.00196628	0.83089
SHISA7	0	0	0	0	0.0498926	0.839439	0.723576	3.53331e-32	0.085666	-0.00410661	0.00238933	0.831691
TINAG	0	0	0	0	0.048905	0.833461	0.731144	3.65083e-32	0.085697	0.00162485	0.000945474	0.831691
HDHD2	0	0	0	0	0.0486962	0.840677	0.728902	4.09735e-32	0.0857993	-0.00287123	0.00167127	0.832196
ZBTB8B	0	0	0	0	0.0501019	0.8347	0.718964	3.58475e-32	0.0859251	0.00218121	0.00127013	0.832196
PPM1D	0	0	0	0	0.0501825	0.841091	0.716523	3.63725e-32	0.0859484	-0.00317122	0.00184676	0.832196
VSX2	0	0	0	0	0.0492117	0.838395	0.714017	3.56185e-32	0.0859745	0.00185738	0.00108173	0.832196
SELENOF	0	0	0	0	0.0492293	0.8349	0.72438	3.91443e-32	0.0860254	0.00270346	0.00157474	0.832196
GPR19	0	0	0	0	0.0502252	0.835937	0.71957	3.87406e-32	0.0860288	0.00376314	0.00219203	0.832196
TRAPPC12	0	0	0	0	0.0490896	0.835673	0.719039	3.39542e-32	0.0860643	-0.00111479	0.000649438	0.832196
OR4D10	0	0	0	0	0.0495388	0.839666	0.721095	3.58689e-32	0.0861346	-0.00311192	0.0018133	0.832196
ARHGAP45	0	0	0	0	0.0487245	0.839057	0.726462	3.92699e-32	0.0861526	0.00215596	0.00125634	0.832196
[truncated: 16,635 more rows]

## Sheet: Table S20 ldl_direct_adj
Table S20. The summary statitics for the association analysis of LDL direct (statin adjusted).
[truncated: 18,557 more rows]

[truncated: 4 more sheets: Table S21 lipoprotein_a, Table S22 phosphate, Table S23 shbg, Table S24 testosterone]
