# Supplementary material for: Gene-based burden scores identify rare variant associations for 28 blood biomarkers
Source: Research Square preprint supplement (doi:10.21203/rs.3.rs-2271894/v1), 2023-02-10
Supplement: Supplementary file 3 [file 49a71e4a601364f754882781.xlsx]

## Sheet: Table S1 biomarkers_fields
Table S1. Names and fields of biomarkers as written in UK biobank
UKBB field	Biomarker
30620	Alanine aminotransferase
30600	Albumin
30610	Alkaline phosphatase
30630	Apolipoprotein A
30640	Apolipoprotein B
30650	Aspartate aminotransferase
30710	C-reactive protein
30680	Calcium
30690	Cholesterol
30700	Creatinine
30720	Cystatin C
30660	Direct bilirubin
30730	Gamma glutamyltransferase
30740	Glucose
30750	Glycated haemoglobin (HbA1c)
30760	HDL cholesterol
30770	IGF-1
30780	LDL direct
30790	Lipoprotein A
30810	Phosphate
30830	SHBG
30850	Testosterone
30840	Total bilirubin
30860	Total protein
30870	Triglycerides
30880	Urate
30670	Urea
30890	Vitamin D

## Sheet: Table S2 lambdas
Table S2. The lambdas for GenRisk, genebass and AstraZeneca PheWas approaches and all their underlying methods.
	GenRisk	Genebass										AstraZeneca PheWAS												Average	CI 0.95
		Burden					SKATO
		pLOF	Missense	Synonymous	Average	CI 0.95	pLOF	Missense	Synonymous	Average	CI 0.95	syn	URmtr	rec	raredmgmtr	UR	raredmg	flexnonsynmtr	ptv	flexdmg	flexnonsyn	ptvraredmg	ptv5pcnt
Alanine aminotransferase	1.022	1.103	1.166	1.148	1.139	0.0806102	1.087	1.311	1.189	1.19567	0.278593	1.0077	1.01146	1.02344	1.02766	1.03109	1.04266	1.04541	1.06362	1.06596	1.07318	1.07741	1.07885	1.0457	0.0163
Albumin	1.045	1.075	1.17	1.164	1.13633	0.132158	1.145	1.337	1.21	1.23067	0.242586	1.00678	1.04092	1.02362	1.02699	1.03091	1.02699	1.08205	1.06965	1.07779	1.08416	1.04219	1.08573	1.04981	0.0179
Alkaline phosphatase	1.075	1.204	1.403	1.358	1.32167	0.259237	1.255	2.158	1.805	1.73933	1.13045	1.03023	1.08799	1.01933	1.0547	1.09998	1.06031	1.12188	1.09445	1.12723	1.08047	1.11342	1.11599	1.08383	0.0227
Apolipoprotein A	1.034	1.13	1.261	1.229	1.20667	0.169656	1.222	1.475	1.322	1.33967	0.316533	1.00194	1.0756	1.02311	1.04585	1.07103	1.06778	1.08349	1.07684	1.09962	1.10787	1.09018	1.09481	1.06984	0.0201
Apolipoprotein B	1.032	1.107	1.181	1.159	1.149	0.0943972	1.135	1.367	1.239	1.247	0.288673	0.999466	1.05182	1.01634	1.05293	1.04595	1.04717	1.08217	1.04234	1.09891	1.05697	1.08102	1.06593	1.05342	0.0175
Aspartate aminotransferase	0.993	1.13	1.213	1.18	1.17433	0.10381	1.143	1.372	1.243	1.25267	0.285193	1.01287	1.03631	1.05282	0.999539	1.04924	1.03002	1.0652	1.11253	1.11379	1.06683	1.09723	1.12865	1.06375	0.0265
Calcium	1.035	1.08	1.1	1.116	1.09867	0.0448064	1.11	1.222	1.155	1.16233	0.140003	1.00515	1.04586	1.02382	1.02519	1.03313	1.03186	1.08688	1.08419	1.07218	1.08525	1.04925	1.0998	1.05355	0.0197
Cholesterol	1.046	1.105	1.195	1.174	1.158	0.116966	1.095	1.309	1.193	1.199	0.266116	1.01297	1.04692	1.02409	1.02986	1.0516	1.03663	1.07681	1.0478	1.08364	1.07538	1.06156	1.05649	1.05031	0.014
C-reactive protein	0.976	1.154	1.297	1.234	1.22833	0.178034	1.179	1.811	1.525	1.505	0.786166	1.05159	1.08008	1.02053	1.04816	1.08128	1.06892	1.08051	1.11084	1.11268	1.11321	1.09282	1.12801	1.08239	0.0201
Creatinine	0.959	1.156	1.274	1.173	1.201	0.15846	1.173	1.507	1.305	1.32833	0.417877	1.02765	1.08584	1.04168	1.06639	1.08329	1.06801	1.10205	1.15029	1.13945	1.11295	1.1189	1.16595	1.09687	0.0272
Creatinine (in urine)	1.026	1.06	1.095	1.062	1.07233	0.0488266	1.038	1.099	1.024	1.05367	0.0990649	1.02353	1.01805	1.01278	1.03001	1.02812	1.02848	1.03352	1.03957	1.04429	1.03141	1.03546	1.03804	1.03027	0.0057
Cystatin C	1.041	1.158	1.296	1.21	1.22133	0.173131	1.24	1.536	1.352	1.376	0.37126	1.00554	1.07112	1.03777	1.04944	1.08553	1.08647	1.10062	1.12772	1.15156	1.11237	1.1322	1.15961	1.09333	0.0298
Direct bilirubin	1.001	1.101	1.209	1.195	1.16833	0.145896	1.149	1.639	1.446	1.41133	0.613166	1.00177	1.03565	1.03509	1.02874	1.02408	1.03329	1.02942	1.04901	1.05323	1.03896	1.05818	1.05093	1.03653	0.0098
Gamma glutamyltransferase	0.979	1.191	1.243	1.186	1.20667	0.0784112	1.266	1.499	1.388	1.38433	0.28951	1.02707	1.00379	1.00624	1.00608	1.03242	1.07299	1.08029	1.09732	1.12043	1.10457	1.12589	1.1088	1.06549	0.0302
Gluscose	0.979	1.05	1.115	1.078	1.081	0.080992	1.034	1.122	1.091	1.08233	0.110881	0.999241	1.00308	1.01586	1.00104	1.00581	1.03066	0.983739	1.02526	1.04304	1.0434	1.03756	1.03572	1.0187	0.0126
Glycated haemoglobin HbA1c	1.011	1.171	1.271	1.229	1.22367	0.124736	1.248	1.557	1.369	1.39133	0.386795	1.03953	1.09735	1.05431	1.03948	1.07056	1.05456	1.07964	1.14051	1.12867	1.08094	1.13567	1.15591	1.08976	0.0262
HDL Cholesterol	1.047	1.152	1.288	1.252	1.23067	0.175045	1.236	1.616	1.398	1.41667	0.473691	0.987444	1.0932	1.00631	1.07	1.08481	1.0637	1.1108	1.11306	1.07853	1.08265	1.08831	1.1169	1.07464	0.0255
IGF1	1.043	1.145	1.251	1.241	1.21233	0.145388	1.203	1.52	1.334	1.35233	0.395706	1.03554	1.09329	1.06626	1.10557	1.06588	1.08257	1.1275	1.09259	1.12436	1.10477	1.13082	1.12734	1.09637	0.019
LDL direct	1.026	1.077	1.166	1.152	1.13167	0.118884	1.077	1.274	1.185	1.17867	0.245067	0.980052	1.04143	1.01366	1.04063	1.04285	1.05982	1.03356	1.02992	1.07826	1.04868	1.04918	1.05541	1.03946	0.0157
Lipoprotein A	0.997	1.088	1.173	1.207	1.156	0.152264	1.116	1.535	1.41	1.35367	0.534351	1.01776	1.01959	0.993241	1.02065	1.01388	1.00907	1.01624	1.0274	1.03266	1.02322	1.04547	1.02365	1.02024	0.0081
Phosphate	1.055	1.033	1.037	1.054	1.04133	0.0276993	0.965	1.004	0.96	0.976333	0.0598431	1.0181	1.02632	1.03574	1.0178	1.03168	1.04739	1.04993	1.10038	1.07566	1.08742	1.05646	1.10588	1.0544	0.0198
Pottasium (in urine)	1.015	1.103	1.152	1.116	1.12367	0.0630567	1.089	1.227	1.173	1.163	0.17275	1.01913	0.994188	1.0123	0.993776	1.00841	0.999999	1.02849	1.04535	1.01732	1.04205	1.00173	1.04714	1.01749	0.0123
Microalbumin (in urine)	0.832	1.003	1.096	1.021	1.04	0.122531	0.967	1.052	1.001	1.00667	0.106277	1.00229	1.00152	1.02217	0.991037	1.00714	1.00971	0.998189	1.00238	1.00305	0.989347	1.00352	1.00382	1.00285	0.0054
SHBG	1.042	1.165	1.226	1.19	1.19367	0.0761757	1.238	1.502	1.32	1.35333	0.335656	1.00031	1.0536	1.02766	1.0161	1.06341	1.05387	1.07952	1.1068	1.07997	1.0718	1.08511	1.14739	1.06546	0.0254
Sodium (in urine)	1.036	1.051	1.105	1.071	1.07567	0.0678189	1.003	1.119	1.062	1.06133	0.144087	1.04396	1.03128	0.986809	1.04442	1.03047	1.03657	1.03976	1.0506	1.04954	1.05473	1.07088	1.0575	1.04138	0.0131
Testosterone	1.011	1.042	1.125	1.096	1.08767	0.104639	0.988	1.153	1.074	1.07167	0.205003	1.0084	1.04799	0.995543	0.987138	1.05538	1.01396	0.996681	1.03047	1.01541	0.989579	1.01193	1.03765	1.01584	0.0144
Total bilirubin	1	1.174	1.314	1.303	1.26367	0.193386	1.259	1.987	1.699	1.64833	0.910772	0.988389	1.02343	1.01787	1.04068	1.00677	1.01761	1.03832	1.0415	1.04468	1.05994	1.03588	1.0475	1.03021	0.0127
Total protein	1.048	1.113	1.256	1.214	1.19433	0.182586	1.158	1.418	1.281	1.28567	0.323094	1.03094	1.10804	1.05523	1.04478	1.09979	1.04886	1.04466	1.11812	1.09875	1.06854	1.09677	1.12701	1.07846	0.021
Triglycerides	1.067	1.111	1.251	1.23	1.19733	0.187554	1.129	1.42	1.289	1.27933	0.36204	1.05521	1.07779	1.03214	1.06141	1.08191	1.05818	1.08622	1.08181	1.0777	1.06091	1.08704	1.09462	1.07125	0.0113
Urate	0.993	1.202	1.24	1.24	1.22733	0.0545003	1.321	1.58	1.385	1.42867	0.335132	0.991349	1.04732	1.02056	1.0643	1.05817	1.07826	1.05342	1.06734	1.09169	1.05284	1.08021	1.09252	1.05816	0.0185
Urea	1.005	1.074	1.134	1.141	1.11633	0.0914869	1.06	1.241	1.169	1.15667	0.226375	1.03257	1.03549	1.02857	1.03681	1.02331	1.05582	1.04001	1.06652	1.07599	1.05584	1.06256	1.07638	1.04916	0.0118
Vitamin D	1.047	1.085	1.096	1.085	1.08867	0.0157764	1.092	1.195	1.113	1.13333	0.135205	1.06864	1.03213	1.04512	0.992428	1.0385	1.00875	1.06029	1.05979	1.07821	1.07273	1.03687	1.09722	1.04922	0.0189

## Sheet: Table S3 ala aminotransferase
Table S3. The summary statitics for the association analysis of alanine aminotransferase
genes	const_pval	sex	age	bmi	PC1	PC2	PC3	PC4	p_value	beta_coef	std_err	fdr_bh_adj_pval
GPT	5.48363e-71	0	6.22931e-39	0	0.570071	0.112989	0.272135	1.80838e-08	1.7694e-196	-0.0544232	0.00181716	3.28329e-192
THRA	3.38554e-68	0	1.32466e-38	0	0.612612	0.107134	0.317232	8.92768e-09	1.6868e-08	0.0354085	0.00627619	0.000156502
HIST1H4J	6.78163e-68	0	1.84359e-38	0	0.623982	0.110776	0.323867	8.68202e-09	1.49647e-05	0.0557883	0.0128861	0.0688935
ANKH	1.61615e-68	0	1.22483e-38	0	0.630919	0.103277	0.318432	8.19077e-09	1.64671e-05	-0.0139007	0.00322654	0.0688935
YPEL5	5.46436e-68	0	1.78937e-38	0	0.616943	0.107208	0.313361	9.18385e-09	1.99922e-05	0.118362	0.0277511	0.0688935
RSPO3	4.45269e-68	0	1.21997e-38	0	0.620644	0.109509	0.328806	8.59493e-09	2.22764e-05	0.0323559	0.00762948	0.0688935
RWDD3	4.68195e-68	0	1.30811e-38	0	0.6253	0.100496	0.329664	9.25178e-09	3.23549e-05	0.0265155	0.0063795	0.0753639
DCAF8L2	5.84355e-68	0	1.26534e-38	0	0.632338	0.105852	0.323272	9.10249e-09	3.24914e-05	0.0489903	0.0117896	0.0753639
ABCC2	1.38539e-67	0	1.3297e-38	0	0.622365	0.107442	0.31543	8.04864e-09	3.91875e-05	0.00469713	0.0011422	0.0786329
DHH	3.98857e-68	0	1.20109e-38	0	0.620359	0.103185	0.324415	7.51198e-09	4.39197e-05	0.0212413	0.00519861	0.0786329
LBX1	4.79802e-68	0	1.31522e-38	0	0.618871	0.10712	0.329203	9.71846e-09	5.07477e-05	0.0143458	0.00354019	0.0786329
VWC2L	4.7818e-68	0	1.26195e-38	0	0.609158	0.103695	0.322729	8.00508e-09	5.08512e-05	0.017273	0.00426304	0.0786329
ADGRE3	1.49888e-67	0	1.38525e-38	0	0.630224	0.102726	0.326511	8.0189e-09	7.53851e-05	0.0077307	0.00195282	0.107604
TMC4	6.50319e-68	0	1.62863e-38	0	0.607079	0.104275	0.324411	8.49774e-09	9.12159e-05	0.0107459	0.00274624	0.1209
CEP112	7.01263e-68	0	9.99979e-39	0	0.615814	0.107788	0.31559	8.2327e-09	0.00011581	0.00565092	0.00146589	0.141557
TAC3	4.78722e-68	0	1.1845e-38	0	0.615342	0.108064	0.313005	8.80996e-09	0.000122059	0.0417015	0.010854	0.141557
SLC30A10	4.67648e-68	0	1.35492e-38	0	0.619143	0.103643	0.315969	8.86385e-09	0.000217936	0.0128605	0.00347829	0.237884
PHF6	4.62727e-68	0	1.34453e-38	0	0.627902	0.105339	0.33203	8.16201e-09	0.000246804	0.0833952	0.0227505	0.244661
ACVR2B	4.91862e-68	0	1.21451e-38	0	0.62508	0.10664	0.327291	1.06837e-08	0.000272367	0.0145329	0.00399218	0.244661
SHBG	5.88858e-68	0	1.2126e-38	0	0.6082	0.107579	0.320734	9.04651e-09	0.000306506	0.0111855	0.00309863	0.244661
CAAP1	7.43206e-68	0	1.33788e-38	0	0.627486	0.104727	0.323442	9.23618e-09	0.00030775	0.00876428	0.0024286	0.244661
C1orf68	4.73802e-68	0	1.28032e-38	0	0.622793	0.105441	0.327882	9.23486e-09	0.000318522	0.0222558	0.00618244	0.244661
ZCCHC6	6.16059e-68	0	1.34108e-38	0	0.61346	0.102573	0.329216	7.69687e-09	0.00032158	0.00651049	0.0018098	0.244661
CBLL1	4.97012e-68	0	1.39979e-38	0	0.616501	0.107647	0.323932	7.98212e-09	0.000327093	0.0236218	0.00657453	0.244661
SMC1B	4.60999e-68	0	1.07575e-38	0	0.615975	0.105205	0.330976	7.37396e-09	0.000329626	0.0112724	0.00313913	0.244661
KRT32	6.35198e-68	0	1.12964e-38	0	0.620735	0.107288	0.321409	9.52844e-09	0.000362812	0.00886048	0.00248482	0.258936
CHST9	6.15854e-68	0	1.23739e-38	0	0.625949	0.106274	0.318344	1.01101e-08	0.000405443	0.0118337	0.00334606	0.278645
EIF4ENIF1	1.43381e-68	0	1.40299e-38	0	0.61419	0.105677	0.324481	8.77016e-09	0.000447753	-0.00581573	0.00165677	0.288796
C11orf71	2.64022e-68	0	9.7186e-39	0	0.626503	0.103133	0.312846	9.26461e-09	0.000461721	0.0373656	0.0106695	0.288796
MVB12B	4.56e-68	0	1.24744e-38	0	0.616821	0.10643	0.321006	8.96094e-09	0.000466905	0.023519	0.00672138	0.288796
RIN1	7.29973e-68	0	1.22226e-38	0	0.612595	0.101407	0.31794	8.92132e-09	0.00051235	0.00606457	0.00174555	0.294357
VSIR	6.65292e-68	0	1.17107e-38	0	0.621759	0.107243	0.314397	7.2231e-09	0.000542559	0.00706614	0.00204289	0.294357
GMEB1	7.62312e-68	0	1.42569e-38	0	0.622901	0.109552	0.315931	1.21672e-08	0.000561779	0.00809573	0.00234693	0.294357
LRMDA	3.41925e-68	0	1.05681e-38	0	0.614695	0.107109	0.323451	9.24262e-09	0.000565683	0.0166028	0.00481571	0.294357
OGT	3.58797e-68	0	1.34153e-38	0	0.615546	0.106134	0.311506	9.29933e-09	0.000580706	0.0491123	0.0142746	0.294357
RUNX2	5.50441e-68	0	1.29043e-38	0	0.630463	0.100945	0.319032	8.16956e-09	0.000581256	0.0132393	0.00384832	0.294357
ELF3	4.85706e-68	0	1.33069e-38	0	0.61829	0.10513	0.32129	7.01255e-09	0.000614672	0.014108	0.00411895	0.294357
KRTAP17-1	3.7878e-68	0	1.20447e-38	0	0.618928	0.107252	0.329821	8.19819e-09	0.000623766	0.103293	0.0301927	0.294357
IL34	2.2996e-68	0	1.18941e-38	0	0.621371	0.108689	0.314208	8.22183e-09	0.000635433	-0.0116681	0.00341564	0.294357
MIXL1	3.27772e-68	0	1.14161e-38	0	0.603441	0.105756	0.318482	8.04881e-09	0.00064805	0.0129656	0.00380142	0.294357
FAM155B	4.05419e-68	0	9.78812e-39	0	0.61333	0.10325	0.327333	9.10809e-09	0.000653094	0.0252264	0.00740075	0.294357
ADAMTS1	8.217e-68	0	1.17558e-38	0	0.617042	0.105136	0.315146	1.08319e-08	0.000678981	0.00378868	0.00111497	0.294357
DGKI	4.45508e-68	0	1.36884e-38	0	0.60306	0.104132	0.318622	9.44037e-09	0.000689704	0.00903176	0.00266132	0.294357
SOX21	3.64123e-68	0	1.17638e-38	0	0.613984	0.107147	0.325268	8.49413e-09	0.000710547	0.0272985	0.00806324	0.294357
CHAD	8.94714e-68	0	1.36082e-38	0	0.631926	0.10721	0.325856	9.17516e-09	0.000720943	0.00698196	0.00206471	0.294357
IRF2	3.95577e-68	0	9.72812e-39	0	0.625198	0.106515	0.328629	9.52172e-09	0.000742752	0.0207221	0.00614285	0.294357
CP	7.71918e-68	0	1.32755e-38	0	0.617393	0.102601	0.326771	7.48721e-09	0.000746708	0.00544848	0.00161585	0.294357
DKK3	1.93165e-68	0	1.21105e-38	0	0.610657	0.10647	0.329292	9.08612e-09	0.000781591	-0.0166685	0.00496188	0.294357
GMIP	9.78631e-69	0	1.31964e-38	0	0.612664	0.10472	0.318065	9.09989e-09	0.000817819	-0.00501211	0.0014976	0.294357
MYLIP	5.43263e-68	0	1.29575e-38	0	0.609751	0.108762	0.31487	1.11608e-08	0.000833897	0.0118149	0.00353595	0.294357
FTL	5.52434e-68	0	1.1704e-38	0	0.628801	0.104336	0.327026	7.34786e-09	0.000834417	0.0175969	0.00526666	0.294357
CREB3L3	1.94685e-68	0	1.43111e-38	0	0.613077	0.105505	0.321485	8.87657e-09	0.000848542	-0.0100279	0.00300549	0.294357
GART	5.32452e-68	0	1.01644e-38	0	0.631619	0.104248	0.32504	9.47591e-09	0.00087116	0.00817372	0.00245516	0.294357
TUFT1	4.73181e-68	0	1.47356e-38	0	0.617299	0.103678	0.32558	9.08408e-09	0.000889063	0.0093996	0.00282819	0.294357
PROCR	5.06825e-68	0	1.32778e-38	0	0.614937	0.104705	0.317409	9.3222e-09	0.000906633	0.0129043	0.00388909	0.294357
NEK7	6.16732e-68	0	1.40912e-38	0	0.613886	0.108231	0.317209	1.08212e-08	0.000914456	0.0104627	0.00315553	0.294357
KRTDAP	4.16358e-68	0	1.4491e-38	0	0.616535	0.10677	0.320542	9.56182e-09	0.000915882	0.0243135	0.00733387	0.294357
RNF213	1.06124e-68	0	1.30722e-38	0	0.611014	0.109756	0.318966	7.19148e-09	0.000920064	-0.00318791	0.000961963	0.294357
CTRB1	3.32818e-68	0	1.26263e-38	0	0.618394	0.105548	0.321824	9.18165e-09	0.000939504	0.0204139	0.00617087	0.295482
FBXO40	2.14492e-68	0	1.3737e-38	0	0.614207	0.108121	0.324478	1.02437e-08	0.000971048	-0.00652297	0.00197735	0.300313
ATG101	3.2438e-68	0	1.05193e-38	0	0.616332	0.105554	0.324469	8.45849e-09	0.00102273	0.021369	0.00650649	0.310598
C6orf47	2.37792e-68	0	1.31701e-38	0	0.610919	0.106732	0.313911	9.14508e-09	0.00104457	-0.0102825	0.00313654	0.310598
GZMM	1.71271e-68	0	1.29785e-38	0	0.617604	0.107083	0.318857	1.00065e-08	0.00105452	-0.00518836	0.00158393	0.310598
BMPR2	4.04466e-68	0	1.32546e-38	0	0.61428	0.102597	0.31865	8.21501e-09	0.00111612	0.010091	0.00309583	0.323604
CEBPG	3.73642e-68	0	1.48127e-38	0	0.608585	0.103936	0.327847	8.10378e-09	0.00114398	0.0177786	0.00546604	0.326579
RHNO1	6.12515e-68	0	1.21194e-38	0	0.619845	0.106166	0.322811	1.01291e-08	0.00117775	0.00568075	0.00175101	0.32913
SMIM22	4.73272e-68	0	1.32278e-38	0	0.623112	0.103347	0.320577	8.64663e-09	0.00118839	0.0259521	0.00800566	0.32913
MRPL38	5.15355e-68	0	1.06095e-38	0	0.616605	0.105472	0.320234	7.98128e-09	0.00131939	0.00664979	0.00207043	0.360038
SLC12A4	1.48948e-68	0	1.16062e-38	0	0.623969	0.105361	0.316485	7.26645e-09	0.00134691	-0.0045099	0.00140677	0.362221
BEND4	2.87195e-68	0	1.27404e-38	0	0.621256	0.10374	0.321969	8.193e-09	0.0014087	-0.0128842	0.00403524	0.373427
LPIN2	6.11808e-68	0	1.1498e-38	0	0.612075	0.105255	0.325239	8.13211e-09	0.00144757	0.00566134	0.00177747	0.373653
PSMD9	6.09465e-68	0	1.46719e-38	0	0.618673	0.108483	0.328657	8.87586e-09	0.00144983	0.0110531	0.00347078	0.373653
REPS1	2.36801e-68	0	1.18748e-38	0	0.625995	0.104157	0.320796	8.66389e-09	0.00161814	-0.00928498	0.00294511	0.411318
ELMSAN1	1.49355e-68	0	1.16764e-38	0	0.611365	0.104564	0.32438	7.39659e-09	0.00169492	-0.00568759	0.00181185	0.425014
KIZ	5.53857e-68	0	1.21788e-38	0	0.624822	0.104641	0.319664	9.51933e-09	0.00175393	0.0315632	0.0100871	0.429384
AOX1	6.25744e-68	0	1.324e-38	0	0.61736	0.110238	0.320745	9.88372e-09	0.00175863	0.00393156	0.00125678	0.429384
ANKRD9	4.73327e-68	0	1.14998e-38	0	0.618339	0.106569	0.314756	8.69405e-09	0.00188645	0.0169829	0.00546494	0.448853
INSR	1.46207e-68	0	1.25285e-38	0	0.605383	0.106649	0.320545	1.03972e-08	0.00188675	-0.00481727	0.00155018	0.448853
CCDC17	1.42034e-68	0	1.13405e-38	0	0.602367	0.103918	0.321433	9.11465e-09	0.00203176	-0.00585955	0.00189899	0.477232
UNC13D	1.0996e-68	0	1.36427e-38	0	0.604504	0.106218	0.329678	9.61933e-09	0.00216944	-0.00384555	0.00125423	0.503201
EIF4EBP2	3.63479e-68	0	1.20866e-38	0	0.61258	0.102608	0.322618	8.49022e-09	0.00220779	0.0138501	0.00452499	0.504503
HNRNPA2B1	4.02723e-68	0	1.193e-38	0	0.619574	0.105254	0.315323	8.41065e-09	0.00222943	0.0351193	0.0114848	0.504503
TRIP4	4.61012e-68	0	1.18262e-38	0	0.617752	0.106283	0.317216	8.61226e-09	0.00232948	0.00682758	0.00224244	0.520792
GIMAP2	1.74856e-68	0	9.33986e-39	0	0.617311	0.103956	0.324973	6.37728e-09	0.0023916	-0.00824788	0.00271599	0.528315
IST1	4.40307e-68	0	1.28241e-38	0	0.614729	0.106958	0.3198	8.27441e-09	0.00247114	0.0152633	0.00504254	0.528675
YWHAE	2.69142e-68	0	9.48953e-39	0	0.609554	0.103923	0.323356	7.79481e-09	0.00247371	0.0369912	0.0122221	0.528675
CAND2	1.49674e-67	0	1.2504e-38	0	0.619428	0.107462	0.322365	7.86062e-09	0.00252461	0.00374547	0.00124005	0.528675
CUL2	5.53863e-68	0	1.34348e-38	0	0.61261	0.106106	0.322217	9.55733e-09	0.00256338	0.0085849	0.00284663	0.528675
SCRIB	8.39961e-68	0	1.41251e-38	0	0.620937	0.105713	0.321749	8.18256e-09	0.00260427	0.00482428	0.00160221	0.528675
BRINP2	4.8981e-68	0	1.08657e-38	0	0.615691	0.106042	0.325938	7.6324e-09	0.00261123	0.00700132	0.00232587	0.528675
MITF	2.32269e-68	0	1.32899e-38	0	0.621727	0.104963	0.329093	8.5764e-09	0.00272253	-0.00677969	0.00226178	0.528675
TMEM95	4.70705e-68	0	1.20498e-38	0	0.622265	0.10634	0.319341	7.85163e-09	0.0027646	0.0115437	0.00385714	0.528675
CT45A1	3.17971e-68	0	1.23174e-38	0	0.609114	0.104609	0.323395	8.4049e-09	0.00277514	0.209975	0.070187	0.528675
OR51S1	6.2029e-68	0	1.44131e-38	0	0.618555	0.105202	0.314615	9.74883e-09	0.00277525	0.00804874	0.00269041	0.528675
PGM5	8.51169e-68	0	1.36351e-38	0	0.627795	0.105512	0.323092	8.60363e-09	0.00278527	0.00656751	0.00219609	0.528675
DLK1	5.40354e-68	0	1.28006e-38	0	0.618581	0.105791	0.320422	1.01004e-08	0.00279835	0.00966597	0.00323372	0.528675
SPECC1	1.97496e-68	0	1.22688e-38	0	0.615637	0.105377	0.320677	9.47234e-09	0.00280356	-0.00726636	0.0024314	0.528675
LYZL1	2.11673e-68	0	1.20791e-38	0	0.613258	0.10451	0.317523	9.47867e-09	0.00281105	-0.0153149	0.00512594	0.528675
ZNF76	2.027e-68	0	1.18239e-38	0	0.621264	0.105193	0.32477	8.30439e-09	0.00285201	-0.00700482	0.00234801	0.528675
ABLIM2	1.61534e-68	0	1.10883e-38	0	0.614475	0.106557	0.310303	9.89753e-09	0.00287788	-0.00519951	0.00174449	0.528675
SLC25A46	4.96807e-68	0	1.21313e-38	0	0.616701	0.1038	0.319631	9.25608e-09	0.00290382	0.009339	0.00313622	0.528675
XAF1	1.96208e-68	0	1.30202e-38	0	0.620279	0.105333	0.322369	7.96519e-09	0.00290606	-0.00786523	0.00264151	0.528675
ISLR2	4.05629e-68	0	1.20306e-38	0	0.611182	0.106873	0.326172	8.08099e-09	0.00295271	0.0117322	0.00394668	0.531946
TFAP2B	2.83064e-68	0	1.23957e-38	0	0.618113	0.105639	0.317859	9.60909e-09	0.0030344	-0.01725	0.00581929	0.541407
CDSN	1.32137e-68	0	1.31086e-38	0	0.601646	0.104101	0.321836	1.09387e-08	0.00308418	-0.00582278	0.00196764	0.543993
PKD2L2	2.03458e-68	0	1.17151e-38	0	0.613436	0.105219	0.326161	9.13813e-09	0.00310753	-0.00729537	0.0024672	0.543993
HLA-A	5.72911e-68	0	1.31762e-38	0	0.614245	0.106518	0.31956	8.08587e-09	0.00319755	0.00671757	0.00227859	0.547479
IGFBPL1	6.27496e-68	0	1.5232e-38	0	0.616629	0.107242	0.324447	9.28267e-09	0.00324698	0.00880002	0.00298976	0.547479
GPR153	6.30555e-68	0	1.26706e-38	0	0.61663	0.105496	0.325861	7.7686e-09	0.0032727	0.00474786	0.0016144	0.547479
B3GALNT2	2.48025e-68	0	1.30835e-38	0	0.615182	0.108464	0.31749	9.58174e-09	0.00327432	-0.00755889	0.00257037	0.547479
ALDOA	4.45588e-68	0	1.12087e-38	0	0.618989	0.105959	0.327414	9.17147e-09	0.00327496	0.0120841	0.00410921	0.547479
CHST8	6.22114e-68	0	1.21663e-38	0	0.617056	0.103971	0.31862	1.13736e-08	0.00341404	0.00775509	0.00264876	0.561794
PQLC2L	3.21781e-68	0	1.2135e-38	0	0.613246	0.105792	0.32263	9.14725e-09	0.00342114	0.0352727	0.0120501	0.561794
HSD11B1	4.28932e-68	0	1.4491e-38	0	0.613292	0.107274	0.32426	8.32595e-09	0.00348014	0.0278961	0.00954741	0.566469
C4orf32	4.18392e-68	0	1.26162e-38	0	0.619553	0.105767	0.318351	8.44671e-09	0.00356221	0.0201247	0.00690483	0.572633
DDX47	2.10672e-68	0	1.19282e-38	0	0.615894	0.10579	0.318559	9.7535e-09	0.0036052	-0.00728269	0.00250193	0.572633
TEKT2	2.11862e-68	0	1.34291e-38	0	0.611064	0.10634	0.316917	1.01125e-08	0.00365474	-0.00824634	0.00283714	0.572633
PHYH	6.10446e-68	0	1.25629e-38	0	0.617644	0.106476	0.322144	8.36871e-09	0.00370301	0.0051869	0.00178707	0.572633
MMD	3.87665e-68	0	1.4068e-38	0	0.613497	0.106306	0.316154	8.32656e-09	0.0037226	0.0218875	0.00754532	0.572633
OTUD7A	2.25481e-68	0	1.31546e-38	0	0.608865	0.104148	0.317882	9.8814e-09	0.00372895	-0.0100588	0.00346822	0.572633
MEX3B	5.16409e-68	0	1.22586e-38	0	0.626359	0.10565	0.32417	9.8772e-09	0.00373402	0.0134728	0.00464604	0.572633
BUD31	3.31624e-68	0	1.20216e-38	0	0.614771	0.106236	0.314508	8.9499e-09	0.00379485	0.0200063	0.00691119	0.576648
APOF	2.55995e-68	0	1.10812e-38	0	0.615022	0.106689	0.325114	8.04613e-09	0.00382236	-0.0243631	0.00842282	0.576648
SLC2A11	7.36711e-68	0	1.24692e-38	0	0.625678	0.1026	0.316925	9.7631e-09	0.00388064	0.00525099	0.00181837	0.580719
PRM2	4.08898e-68	0	1.39031e-38	0	0.6235	0.104221	0.323865	8.59222e-09	0.00403256	0.0324923	0.0112991	0.595908
SYNPO	4.02851e-68	0	1.15571e-38	0	0.613463	0.10648	0.313182	1.14704e-08	0.00404637	0.00718743	0.00250035	0.595908
OR4N4	3.48139e-68	0	1.27953e-38	0	0.617585	0.104839	0.318805	9.16093e-09	0.00416834	0.0322958	0.0112718	0.606569
GAK	5.80281e-68	0	1.11467e-38	0	0.613551	0.106481	0.317188	9.5132e-09	0.00419791	0.0053824	0.00188003	0.606569
EZH1	5.15191e-68	0	1.10496e-38	0	0.621066	0.106037	0.319277	1.02743e-08	0.00421683	0.0112768	0.00394087	0.606569
ZMYM2	2.03351e-68	0	1.23128e-38	0	0.618692	0.104043	0.321592	9.48263e-09	0.0042705	-0.00790989	0.00276811	0.609565
ANXA10	5.21215e-68	0	1.45805e-38	0	0.614048	0.107555	0.319764	1.00357e-08	0.004353	0.00691824	0.00242624	0.616598
LACC1	3.64368e-68	0	1.10253e-38	0	0.616102	0.107264	0.318622	9.51699e-09	0.00443153	0.0179886	0.00632123	0.617551
ADPGK	7.03513e-68	0	1.32867e-38	0	0.622048	0.10696	0.326537	8.50981e-09	0.0045222	0.00721605	0.00254151	0.617551
GSG1L	4.8081e-68	0	1.38047e-38	0	0.621738	0.107337	0.333553	9.163e-09	0.00452589	0.00780771	0.00275014	0.617551
HMGA2	3.48242e-68	0	1.31534e-38	0	0.617581	0.10421	0.32223	8.66166e-09	0.00457261	0.0409217	0.0144307	0.617551
CSNK1G3	3.4678e-68	0	1.27806e-38	0	0.611396	0.10481	0.320935	8.53882e-09	0.00458697	0.0157219	0.00554614	0.617551
AATF	4.54217e-68	0	1.32025e-38	0	0.614302	0.104947	0.330571	8.26466e-09	0.00458894	0.00622625	0.00219652	0.617551
APP	2.32538e-68	0	1.37862e-38	0	0.61337	0.105125	0.32321	8.39031e-09	0.00459269	-0.00741802	0.0026172	0.617551
KAT2A	4.91997e-68	0	1.1791e-38	0	0.61782	0.106139	0.321537	7.84628e-09	0.00468041	0.00797529	0.00281983	0.624818
ST3GAL3	4.85716e-68	0	1.35262e-38	0	0.614982	0.10557	0.329789	9.22897e-09	0.00471948	0.0130437	0.00461622	0.62548
SLC2A8	6.29404e-68	0	1.7725e-38	0	0.622819	0.10578	0.325304	7.85215e-09	0.00475279	0.00566114	0.0020051	0.62548
SLC22A5	1.94607e-68	0	1.38385e-38	0	0.621886	0.105609	0.319806	9.71119e-09	0.00478736	-0.00402809	0.00142787	0.625594
AFG3L2	2.42799e-68	0	1.42042e-38	0	0.622149	0.105001	0.316857	9.53883e-09	0.00490777	-0.00653551	0.00232327	0.635193
SLC45A3	4.85169e-68	0	1.18794e-38	0	0.622399	0.105392	0.32236	9.25266e-09	0.0049996	0.00762778	0.00271732	0.635193
ANKRD46	4.51541e-68	0	1.4473e-38	0	0.619668	0.106353	0.316951	9.51157e-09	0.00502538	0.0225141	0.00802516	0.635193
CCDC130	2.19302e-68	0	1.16162e-38	0	0.615219	0.106772	0.31816	8.94388e-09	0.0050743	-0.00618514	0.00220715	0.635193
ANKRD22	2.79968e-68	0	1.38017e-38	0	0.616613	0.107277	0.323327	9.09339e-09	0.00509429	-0.010384	0.00370717	0.635193
RNF125	1.98771e-68	0	1.21894e-38	0	0.608028	0.103757	0.315995	9.32444e-09	0.00513082	-0.0100911	0.00360558	0.635193
APTX	3.73975e-68	0	1.08252e-38	0	0.61687	0.104042	0.327026	9.46469e-09	0.00514613	0.00605243	0.00216329	0.635193
SLC31A1	2.88577e-68	0	1.18447e-38	0	0.610379	0.104025	0.319052	8.81907e-09	0.00516474	0.0241327	0.00862926	0.635193
UNC79	5.79019e-68	0	1.2237e-38	0	0.62302	0.101739	0.326668	8.65223e-09	0.0051689	0.00531811	0.0019018	0.635193
BAHD1	2.01822e-68	0	1.18232e-38	0	0.616759	0.101445	0.330804	8.52084e-09	0.00531161	-0.00850688	0.00305175	0.648435
TGM5	1.60645e-68	0	1.25322e-38	0	0.600816	0.10504	0.318074	9.813e-09	0.00538879	-0.00518506	0.00186321	0.649923
TARSL2	4.53321e-68	0	1.29457e-38	0	0.61205	0.104583	0.325602	7.74578e-09	0.00539384	0.00704458	0.00253169	0.649923
SPDYE5	5.9036e-68	0	1.02675e-38	0	0.623421	0.104199	0.329838	7.83834e-09	0.00547264	0.0710739	0.0255859	0.655163
PANX1	3.21372e-68	0	1.40006e-38	0	0.618981	0.105761	0.31881	8.79136e-09	0.00552509	-0.0117328	0.00422841	0.657202
C12orf65	3.90584e-68	0	1.29317e-38	0	0.620598	0.106352	0.324444	8.35039e-09	0.00562199	0.0236969	0.00855765	0.664469
HSPB3	3.99433e-68	0	1.31367e-38	0	0.619035	0.103834	0.316219	9.98644e-09	0.00571176	0.0121426	0.00439326	0.667573
NAA38	4.28176e-68	0	1.48752e-38	0	0.611545	0.10414	0.322127	7.63354e-09	0.0057202	0.0110013	0.00398099	0.667573
TMEM266	6.73386e-68	0	1.40834e-38	0	0.613525	0.10574	0.321647	1.01831e-08	0.00586917	0.00580866	0.00210837	0.677223
CFAP61	1.66451e-68	0	1.22149e-38	0	0.603577	0.106091	0.32204	8.09076e-09	0.00587589	-0.00566437	0.00205628	0.677223
STXBP1	3.42305e-68	0	1.25455e-38	0	0.612138	0.103749	0.317835	9.42964e-09	0.00602674	0.0169195	0.00616071	0.687582
DYRK1B	5.18664e-68	0	1.34246e-38	0	0.615985	0.103278	0.323239	8.44091e-09	0.00607351	0.00748985	0.00272971	0.687582
USP26	3.56218e-68	0	1.18284e-38	0	0.624822	0.105873	0.31634	8.815e-09	0.00615982	0.0217375	0.00793572	0.687582
DPP10	5.92571e-68	0	1.313e-38	0	0.61255	0.104645	0.323061	9.88849e-09	0.0061838	0.00458608	0.00167503	0.687582
MSGN1	3.19476e-68	0	1.17279e-38	0	0.612127	0.102421	0.324095	8.04702e-09	0.00619965	0.0315465	0.0115256	0.687582
CYP46A1	4.56593e-68	0	1.31954e-38	0	0.619088	0.10563	0.320752	8.33675e-09	0.00625554	0.0158625	0.00580169	0.687582
ITGA2B	5.62978e-68	0	1.20632e-38	0	0.617923	0.104677	0.31505	9.85452e-09	0.0062653	0.00666662	0.00243877	0.687582
C9orf172	4.03068e-68	0	1.21095e-38	0	0.615993	0.106856	0.322371	1.0491e-08	0.00635694	0.0100612	0.00368701	0.687582
MRGPRE	4.82797e-68	0	1.39146e-38	0	0.61626	0.105396	0.321645	7.8032e-09	0.00639811	0.00897797	0.00329263	0.687582
SRFBP1	3.53769e-68	0	1.18427e-38	0	0.610568	0.105899	0.32493	9.30969e-09	0.00643644	0.00902742	0.00331316	0.687582
IRS1	2.04138e-68	0	1.38959e-38	0	0.616348	0.103705	0.32023	8.85394e-09	0.00651478	-0.00629642	0.00231425	0.687582
ARHGAP39	1.71247e-68	0	1.08863e-38	0	0.615991	0.107613	0.321953	9.19654e-09	0.00663111	-0.00492501	0.00181409	0.687582
MT1G	2.6691e-68	0	1.1906e-38	0	0.617396	0.104783	0.314169	9.86726e-09	0.00669509	-0.0376214	0.0138738	0.687582
SELENOF	4.84508e-68	0	1.26047e-38	0	0.619652	0.106115	0.32266	8.88902e-09	0.00669722	0.0102149	0.00376713	0.687582
TMBIM4	2.65434e-68	0	1.13551e-38	0	0.621431	0.106591	0.319937	9.69198e-09	0.00671115	-0.0122017	0.004501	0.687582
ZNF776	3.5824e-68	0	1.19664e-38	0	0.614443	0.106047	0.325209	1.02258e-08	0.00673974	0.0112415	0.00414897	0.687582
SPATS2	5.80792e-68	0	1.12263e-38	0	0.619581	0.106808	0.327498	1.00698e-08	0.00677348	0.00572939	0.00211587	0.687582
NMUR2	6.88458e-68	0	1.48399e-38	0	0.623779	0.103313	0.319602	8.8011e-09	0.00679172	0.0070869	0.00261806	0.687582
USP50	5.22353e-68	0	1.41114e-38	0	0.622212	0.105389	0.319831	9.49451e-09	0.00682459	0.00853223	0.00315387	0.687582
DDX42	5.84864e-68	0	1.40756e-38	0	0.613314	0.105834	0.327898	8.07122e-09	0.00684735	0.00732408	0.00270839	0.687582
NYNRIN	2.36056e-68	0	1.14571e-38	0	0.62713	0.104914	0.322617	9.65303e-09	0.00684808	-0.00700675	0.00259108	0.687582
OR4A16	3.04174e-68	0	1.2006e-38	0	0.620627	0.104901	0.323612	8.72426e-09	0.00684809	0.0102424	0.00378763	0.687582
ANO5	7.99315e-68	0	1.52632e-38	0	0.633689	0.104506	0.321025	8.45794e-09	0.00692264	0.00559633	0.00207227	0.687582
DDX25	3.99768e-68	0	1.18463e-38	0	0.614926	0.108251	0.328531	8.74004e-09	0.00692968	0.00569438	0.00210884	0.687582
LILRB2	2.79061e-68	0	1.48206e-38	0	0.626535	0.104608	0.320377	9.20948e-09	0.00693139	-0.00623753	0.00231006	0.687582
OR8B4	3.77574e-68	0	1.16669e-38	0	0.619662	0.108327	0.318087	9.67141e-09	0.00698445	0.0154816	0.00573897	0.687582
DOK5	2.11896e-68	0	1.04427e-38	0	0.616248	0.104945	0.325202	8.50907e-09	0.00701966	-0.00830727	0.00308139	0.687582
POU6F2	3.75361e-68	0	1.10485e-38	0	0.613673	0.105822	0.324588	8.43708e-09	0.00702758	0.00867176	0.00321704	0.687582
GTPBP10	2.35651e-68	0	1.19372e-38	0	0.614939	0.103076	0.321163	8.55886e-09	0.00704034	-0.00728946	0.00270484	0.687582
CNOT11	4.49778e-68	0	1.40802e-38	0	0.612994	0.103277	0.323601	8.54764e-09	0.007153	0.012458	0.0046318	0.688756
KLK11	4.06371e-68	0	1.37501e-38	0	0.608724	0.106977	0.317213	8.96734e-09	0.00715479	0.0126598	0.00470696	0.688756
HSD17B3	5.63653e-68	0	1.34282e-38	0	0.617956	0.104786	0.319349	9.07046e-09	0.00719632	0.00659708	0.00245458	0.688756
BRAP	3.94995e-68	0	1.09006e-38	0	0.625235	0.10486	0.323393	8.24057e-09	0.00725133	0.0106507	0.00396659	0.688756
RAB3IL1	4.33732e-68	0	1.30618e-38	0	0.621981	0.105028	0.314299	9.91366e-09	0.00726784	0.00954016	0.00355399	0.688756
MCMDC2	5.58425e-68	0	1.40696e-38	0	0.623329	0.106528	0.320723	8.65893e-09	0.00730419	0.00931834	0.00347351	0.688756
EFTUD2	4.48537e-68	0	1.20424e-38	0	0.628081	0.105039	0.320592	9.42301e-09	0.00731219	0.0118592	0.00442124	0.688756
CFC1B	2.58341e-68	0	1.27456e-38	0	0.609168	0.105543	0.325055	8.65751e-09	0.00738779	0.0908266	0.0339047	0.69221
AIF1	4.15236e-68	0	1.31156e-38	0	0.620447	0.105646	0.323759	8.46947e-09	0.00742347	0.0223625	0.00835274	0.69221
ASIC2	1.86303e-68	0	1.13586e-38	0	0.612441	0.106443	0.32239	8.67608e-09	0.00754232	-0.00705461	0.00264026	0.699777
KIRREL3	5.09924e-68	0	1.2521e-38	0	0.613694	0.106239	0.320141	9.16716e-09	0.00766265	0.00662751	0.00248536	0.703014
ZNF782	4.32934e-68	0	1.06445e-38	0	0.614164	0.102862	0.317549	7.60775e-09	0.00766388	0.0115126	0.00431738	0.703014
CLDN1	3.7331e-68	0	1.33137e-38	0	0.609807	0.102682	0.321067	9.63182e-09	0.00769087	0.0094241	0.00353574	0.703014
GAS2L2	1.95573e-68	0	1.23318e-38	0	0.616472	0.101243	0.317011	8.51039e-09	0.0078007	-0.00576448	0.0021666	0.703061
GSTM3	4.16556e-68	0	1.36127e-38	0	0.615791	0.105968	0.33229	8.04472e-09	0.00788143	0.0112811	0.00424558	0.703061
TM6SF2	4.8197e-68	0	1.30524e-38	0	0.608545	0.107573	0.328217	8.67993e-09	0.0079161	0.00688432	0.00259232	0.703061
MAP3K13	8.17158e-68	0	1.22871e-38	0	0.621212	0.106175	0.326102	8.2605e-09	0.00792068	0.0055883	0.00210445	0.703061
NDUFAF5	3.60909e-68	0	1.31073e-38	0	0.610512	0.104876	0.32927	8.73837e-09	0.00797035	0.00785529	0.00296051	0.703061
AK9	5.13011e-68	0	1.07776e-38	0	0.612435	0.107494	0.322162	8.75578e-09	0.00800328	0.00392908	0.00148157	0.703061
EXOC8	4.49039e-68	0	1.18638e-38	0	0.617966	0.106229	0.32719	8.59783e-09	0.00806262	0.00898984	0.00339307	0.703061
CCT6B	4.90668e-68	0	1.27099e-38	0	0.616424	0.107723	0.328368	8.07787e-09	0.00807619	0.00818189	0.00308878	0.703061
NR4A3	6.29078e-68	0	1.52479e-38	0	0.616511	0.107837	0.320615	8.23332e-09	0.00809722	0.0114711	0.00433194	0.703061
HIST1H3I	3.96794e-68	0	1.31502e-38	0	0.619654	0.10646	0.320013	8.47565e-09	0.0080996	0.0188519	0.00711949	0.703061
MANEA	4.2101e-68	0	1.22315e-38	0	0.61083	0.106225	0.319692	9.18199e-09	0.00810816	0.00964683	0.00364366	0.703061
ATOX1	2.53116e-68	0	9.92563e-39	0	0.605617	0.106856	0.321195	1.0237e-08	0.0081528	0.0409226	0.0154675	0.703644
COX6A2	2.30843e-68	0	1.34236e-38	0	0.614452	0.106169	0.3173	1.1483e-08	0.00827683	-0.0123066	0.00466052	0.707755
AFF1	1.82833e-68	0	1.20911e-38	0	0.615928	0.107242	0.323193	8.93411e-09	0.00828313	-0.00585131	0.00221612	0.707755
PON2	4.57173e-68	0	1.29089e-38	0	0.619494	0.104546	0.322008	9.27051e-09	0.00831487	0.0136488	0.00517188	0.707755
TTC19	5.7565e-68	0	1.3353e-38	0	0.624174	0.106543	0.320193	9.83034e-09	0.0083773	0.00633531	0.00240292	0.709814
SERTAD1	3.64689e-68	0	1.21937e-38	0	0.626365	0.107067	0.321394	9.04761e-09	0.00846678	-0.0198813	0.0075511	0.714134
SLC33A1	2.07118e-68	0	1.40663e-38	0	0.624118	0.105503	0.315841	1.18335e-08	0.00853473	-0.00546752	0.00207876	0.714385
CAT	2.28866e-68	0	1.26365e-38	0	0.619558	0.105743	0.322129	9.82214e-09	0.00854675	-0.00645484	0.00245458	0.714385
TMEM140	4.52387e-68	0	1.19622e-38	0	0.621602	0.10598	0.32686	9.68431e-09	0.00865549	0.0115017	0.00438092	0.718073
TENM3	9.18807e-68	0	1.43131e-38	0	0.62053	0.109702	0.327783	7.73337e-09	0.00869925	0.00365515	0.00139314	0.718073
ME1	5.0129e-68	0	1.31985e-38	0	0.616595	0.108368	0.323463	8.35279e-09	0.00873256	0.00731738	0.00279035	0.718073
PPARG	4.35769e-68	0	1.2595e-38	0	0.616886	0.106736	0.320213	8.64152e-09	0.00885717	0.0178778	0.00682998	0.718073
CYP2C9	1.9021e-68	0	1.26247e-38	0	0.617266	0.104521	0.324638	8.72308e-09	0.00903971	-0.00537269	0.00205804	0.718073
MARK2	3.64912e-68	0	1.03516e-38	0	0.610093	0.104887	0.320145	9.23512e-09	0.00904176	0.0100675	0.00385655	0.718073
ERICH4	5.85697e-68	0	1.39783e-38	0	0.617948	0.108411	0.318046	1.02065e-08	0.00912173	0.00830263	0.00318414	0.718073
OR2A14	2.05395e-68	0	1.19251e-38	0	0.604853	0.106762	0.321436	9.21707e-09	0.00914542	-0.0109067	0.00418426	0.718073
GARS	4.92189e-68	0	1.4054e-38	0	0.609138	0.106492	0.315486	8.60544e-09	0.0091639	0.00525577	0.00201686	0.718073
OR6C4	2.8628e-68	0	1.41147e-38	0	0.622043	0.108044	0.322102	9.27286e-09	0.00917649	-0.0103735	0.00398147	0.718073
DCAF4	5.52142e-68	0	1.16111e-38	0	0.618945	0.104026	0.32366	7.85383e-09	0.00920271	0.00549657	0.00211044	0.718073
MKRN2	2.29755e-68	0	1.28461e-38	0	0.612407	0.102413	0.322638	8.70416e-09	0.0092034	-0.010566	0.00405692	0.718073
THAP1	3.10644e-68	0	1.21478e-38	0	0.609497	0.105463	0.321398	8.6762e-09	0.00921131	0.0211257	0.00811232	0.718073
GSTM1	4.61257e-68	0	1.35514e-38	0	0.624586	0.105003	0.323521	9.14329e-09	0.00921762	0.0211804	0.00813408	0.718073
ZBTB7C	6.867e-68	0	1.35648e-38	0	0.617035	0.106303	0.315277	1.10719e-08	0.00921955	0.00526308	0.00202128	0.718073
PDE11A	6.37213e-68	0	1.3304e-38	0	0.613248	0.105649	0.320112	1.00573e-08	0.00932471	0.00281954	0.00108446	0.718073
RETREG3	2.72318e-68	0	1.22816e-38	0	0.621132	0.1057	0.325749	7.98155e-09	0.00932566	-0.0120244	0.00462493	0.718073
HK3	7.75539e-68	0	1.13894e-38	0	0.620721	0.10847	0.316927	9.54394e-09	0.00934058	0.00314346	0.00120932	0.718073
LCE3E	2.67892e-68	0	1.18418e-38	0	0.618615	0.105945	0.319978	8.25298e-09	0.00934472	-0.0255385	0.00982546	0.718073
ABCB4	7.59289e-68	0	1.36677e-38	0	0.611774	0.104441	0.317592	7.46844e-09	0.00940134	0.00338105	0.00130184	0.718073
KLHL7	2.65843e-68	0	1.1328e-38	0	0.621208	0.103645	0.326712	8.95005e-09	0.00940352	-0.0148704	0.00572585	0.718073
OR10G9	4.14725e-68	0	1.32652e-38	0	0.618966	0.103318	0.317461	8.04437e-09	0.00951407	0.00978539	0.00377371	0.721114
RBM19	6.28173e-68	0	1.33785e-38	0	0.614726	0.105181	0.319627	9.63215e-09	0.00956451	0.00353037	0.00136244	0.721114
NAGS	2.39001e-68	0	1.2943e-38	0	0.613353	0.106985	0.323139	1.00685e-08	0.00961489	-0.00770298	0.0029748	0.721114
EXOSC3	4.40145e-68	0	1.51766e-38	0	0.607636	0.106974	0.323356	8.65785e-09	0.0096173	0.00715289	0.00276245	0.721114
GORAB	4.62861e-68	0	1.35681e-38	0	0.618836	0.107865	0.321229	8.77511e-09	0.00970239	0.00965348	0.00373255	0.721114
SLAIN1	5.62257e-68	0	1.28526e-38	0	0.622594	0.103524	0.322147	7.56411e-09	0.00976021	0.00754036	0.00291782	0.721114
OR5B21	4.57151e-68	0	1.22632e-38	0	0.622064	0.109656	0.321506	8.54788e-09	0.00976648	0.0113124	0.00437783	0.721114
GAPVD1	8.02137e-68	0	1.25397e-38	0	0.620651	0.106146	0.317276	9.19463e-09	0.00978547	0.00364924	0.0014126	0.721114
PIK3C2A	4.87698e-68	0	1.16877e-38	0	0.622355	0.104649	0.32231	8.13701e-09	0.0097931	0.00615279	0.00238195	0.721114
MPZL1	3.01549e-68	0	1.17676e-38	0	0.621208	0.10868	0.323671	8.63262e-09	0.00991826	-0.0134117	0.00520096	0.727443
CCDC183	5.33916e-68	0	1.27254e-38	0	0.620184	0.107726	0.32257	9.29682e-09	0.00999343	0.00524632	0.00203654	0.730071
ZNF727	7.3791e-68	0	1.275e-38	0	0.619376	0.103355	0.322359	8.78161e-09	0.0100493	0.00602165	0.00233927	0.731275
CIDEB	2.90701e-68	0	1.34044e-38	0	0.617827	0.105014	0.322936	9.57287e-09	0.0101636	-0.00943146	0.00366947	0.7367
CYP8B1	4.53324e-68	0	1.2593e-38	0	0.618439	0.107436	0.325818	8.46894e-09	0.0102169	0.0111513	0.00434168	0.737686
TEX12	6.34133e-68	0	1.26076e-38	0	0.620413	0.103819	0.318603	9.16717e-09	0.0102632	0.0134019	0.00522113	0.738155
PCNX4	3.75742e-68	0	1.29309e-38	0	0.61445	0.103934	0.3218	9.15265e-09	0.0103825	0.00536223	0.00209229	0.741014
OR1L6	4.18595e-68	0	1.07851e-38	0	0.620956	0.105047	0.315895	9.58631e-09	0.0104073	0.00953727	0.00372255	0.741014
ABCB11	1.83911e-68	0	1.20298e-38	0	0.609556	0.104731	0.320627	8.38706e-09	0.0105101	-0.00505203	0.00197452	0.741014
FHDC1	6.36284e-68	0	1.42214e-38	0	0.620357	0.105066	0.319803	8.3884e-09	0.0106694	0.00463496	0.00181523	0.741014
DSG2	1.34008e-68	0	1.31903e-38	0	0.615307	0.105211	0.317872	1.06241e-08	0.0107187	-0.00406913	0.00159463	0.741014
CEBPD	3.91079e-68	0	1.24713e-38	0	0.614611	0.104648	0.321968	9.03282e-09	0.0107824	0.0107295	0.00420815	0.741014
CPNE3	7.06045e-68	0	1.35214e-38	0	0.624784	0.102914	0.324852	8.88441e-09	0.0107919	0.00403575	0.00158302	0.741014
HIST1H4C	3.77458e-68	0	1.24538e-38	0	0.620141	0.104151	0.320353	8.37371e-09	0.0109013	0.0164893	0.00647684	0.741014
LRRC61	4.38173e-68	0	1.34356e-38	0	0.616117	0.106022	0.321569	8.07064e-09	0.0109098	0.0122933	0.00482922	0.741014
PLPP4	4.37758e-68	0	1.26335e-38	0	0.624198	0.10331	0.323219	8.69791e-09	0.0109199	0.00876089	0.00344201	0.741014
RLBP1	4.57552e-68	0	1.2462e-38	0	0.618651	0.10502	0.326323	8.47085e-09	0.0109565	0.00663321	0.00260728	0.741014
TRPC4AP	4.50469e-68	0	1.31712e-38	0	0.611986	0.10737	0.32174	8.08809e-09	0.0110573	0.00637075	0.00250727	0.741014
DMRTA1	2.22865e-68	0	1.30016e-38	0	0.617413	0.108317	0.322851	8.18192e-09	0.0110739	-0.00521057	0.00205109	0.741014
MECOM	2.18624e-68	0	1.37488e-38	0	0.618822	0.109089	0.319467	9.5922e-09	0.0110893	-0.00527712	0.00207768	0.741014
OR10Q1	3.72507e-68	0	1.11094e-38	0	0.618741	0.105723	0.320074	8.91622e-09	0.0111139	0.0159892	0.00629711	0.741014
HEBP1	4.87054e-68	0	1.31597e-38	0	0.614785	0.105733	0.321777	8.84587e-09	0.0111532	0.0099414	0.00391719	0.741014
GDA	4.56186e-68	0	1.31517e-38	0	0.611383	0.10687	0.320588	9.02257e-09	0.0112165	0.0115533	0.00455587	0.741014
PRSS57	5.2614e-68	0	1.25675e-38	0	0.623799	0.106526	0.325634	9.0716e-09	0.0112384	0.00464611	0.00183262	0.741014
GJA5	4.0723e-68	0	1.13729e-38	0	0.624075	0.105391	0.315034	9.33392e-09	0.0112582	0.0131527	0.00518925	0.741014
CHURC1	3.82225e-68	0	1.31707e-38	0	0.616776	0.105592	0.321295	8.7866e-09	0.0112883	0.0177759	0.00701583	0.741014
OR6F1	3.12546e-68	0	1.1446e-38	0	0.609904	0.105834	0.319051	8.37308e-09	0.0113214	0.0241475	0.00953449	0.741014
ATP2A2	4.32085e-68	0	1.35155e-38	0	0.619556	0.104124	0.316964	8.79103e-09	0.0114496	0.0123229	0.00487322	0.741014
CMYA5	1.15036e-67	0	1.41505e-38	0	0.622224	0.107247	0.321876	9.68644e-09	0.0114522	0.0023113	0.000914057	0.741014
SNRNP48	3.80082e-68	0	1.27366e-38	0	0.61287	0.104432	0.322083	8.77422e-09	0.0115146	0.0086582	0.00342667	0.741014
BOLA1	4.58662e-68	0	1.21683e-38	0	0.613557	0.108139	0.319909	1.04402e-08	0.0115393	0.00651125	0.00257773	0.741014
BAG5	4.88355e-68	0	1.25274e-38	0	0.622852	0.104	0.326894	8.54273e-09	0.0117037	0.0110629	0.00438833	0.741014
C18orf54	4.09555e-68	0	1.29799e-38	0	0.616596	0.105742	0.320133	8.50762e-09	0.0117191	0.011769	0.00466927	0.741014
PGLYRP4	5.3871e-68	0	1.29133e-38	0	0.619199	0.107284	0.321798	1.11771e-08	0.0117533	0.00589307	0.00233899	0.741014
SPESP1	3.56485e-68	0	1.32555e-38	0	0.610377	0.106309	0.321029	9.03933e-09	0.0117758	0.0153113	0.00607874	0.741014
ZNF17	3.57611e-68	0	1.22535e-38	0	0.622039	0.107325	0.322032	9.12736e-09	0.0117998	0.013592	0.00539771	0.741014
FAM20A	4.18318e-68	0	1.11508e-38	0	0.612452	0.106047	0.319314	8.62062e-09	0.0118062	0.00596578	0.00236933	0.741014
MRPL10	3.98075e-68	0	1.19843e-38	0	0.615727	0.10721	0.32668	8.79766e-09	0.0118178	0.0128864	0.00511859	0.741014
NABP2	2.56992e-68	0	1.2834e-38	0	0.612863	0.104903	0.321458	9.73308e-09	0.0118892	-0.0281335	0.0111843	0.741014
OR8D4	4.91734e-68	0	1.37144e-38	0	0.615768	0.104588	0.316586	8.15896e-09	0.0120233	0.0116605	0.00464287	0.741014
ZBTB20	1.73564e-68	0	1.17484e-38	0	0.615717	0.104974	0.32834	6.72315e-09	0.0120707	-0.00839385	0.00334403	0.741014
KLHDC9	4.41782e-68	0	1.34156e-38	0	0.613195	0.105804	0.321237	9.76122e-09	0.0120725	0.00693444	0.00276267	0.741014
UTS2	3.96618e-68	0	1.17312e-38	0	0.619672	0.102947	0.322063	8.94688e-09	0.0121075	0.0295905	0.0117936	0.741014
NBPF9	2.38281e-68	0	1.09511e-38	0	0.613124	0.105158	0.326412	8.98274e-09	0.0121757	-0.0274954	0.0109673	0.741014
DOK7	6.68978e-68	0	1.26101e-38	0	0.624956	0.104317	0.323488	7.64411e-09	0.0121775	0.00508823	0.00202962	0.741014
FCGR3B	4.53293e-68	0	1.33285e-38	0	0.620331	0.106768	0.324062	7.90938e-09	0.0121975	0.0153588	0.00612779	0.741014
ACAD10	1.79029e-68	0	1.30177e-38	0	0.615435	0.104724	0.324235	9.44967e-09	0.0122399	-0.00417433	0.00166628	0.741014
SPIN2A	4.66755e-68	0	1.20854e-38	0	0.625576	0.108038	0.324454	8.7024e-09	0.0122412	0.0249376	0.00995456	0.741014
NUDC	2.44997e-68	0	1.17305e-38	0	0.615654	0.104546	0.319491	9.03077e-09	0.012259	-0.0115281	0.00460272	0.741014
HLA-DQB2	1.77503e-68	0	1.46416e-38	0	0.607137	0.105606	0.316266	1.05149e-08	0.0122609	-0.00719552	0.00287295	0.741014
GLP1R	5.09599e-68	0	1.22803e-38	0	0.618316	0.106262	0.320044	8.95387e-09	0.0122767	0.00710373	0.00283682	0.741014
CLDN16	4.60766e-68	0	1.25441e-38	0	0.624272	0.104067	0.315764	9.86747e-09	0.0123044	0.015959	0.00637513	0.741014
CLDN12	3.44634e-68	0	1.23545e-38	0	0.619237	0.106191	0.31979	9.03376e-09	0.0123158	-0.0165765	0.00662265	0.741014
TRIP11	6.48148e-68	0	1.19663e-38	0	0.614639	0.104308	0.317455	1.19274e-08	0.0123451	0.00289017	0.00115507	0.741014
PLPP3	3.63551e-68	0	1.14094e-38	0	0.616451	0.105425	0.322554	9.13836e-09	0.0123654	0.0143771	0.00574723	0.741014
FSTL1	4.46345e-68	0	1.27651e-38	0	0.621511	0.106636	0.322843	9.15644e-09	0.0123822	0.0111822	0.00447091	0.741014
PRSS23	1.76154e-68	0	1.23439e-38	0	0.61096	0.10698	0.321023	1.04174e-08	0.0123827	-0.00584746	0.00233798	0.741014
C1orf115	4.16376e-68	0	1.22215e-38	0	0.610603	0.106094	0.318063	9.63015e-09	0.0124855	0.0118358	0.00473782	0.741014
CCL21	3.30229e-68	0	1.20319e-38	0	0.615028	0.103464	0.31968	8.55289e-09	0.0125441	0.0217395	0.00870805	0.741014
ALB	4.82852e-68	0	1.34947e-38	0	0.621057	0.106138	0.328312	8.45059e-09	0.012555	0.00959614	0.00384433	0.741014
C2CD4C	5.86993e-68	0	1.32812e-38	0	0.619638	0.104195	0.316434	9.47403e-09	0.0125883	0.00495257	0.0019848	0.741014
PCDH11X	1.92217e-68	0	1.23389e-38	0	0.623251	0.103867	0.321795	8.9578e-09	0.0126046	-0.0125987	0.00505003	0.741014
BIRC2	3.91628e-68	0	1.1951e-38	0	0.60821	0.108059	0.316781	9.49939e-09	0.0126051	0.00722869	0.00289754	0.741014
TMEM129	2.89507e-68	0	1.2163e-38	0	0.620801	0.105615	0.330441	8.84871e-09	0.0126191	-0.00933202	0.00374123	0.741014
TMX1	4.11431e-68	0	1.26486e-38	0	0.61889	0.10572	0.324087	8.85821e-09	0.012703	0.0124888	0.00501152	0.741732
HIST1H2BE	3.44749e-68	0	1.17118e-38	0	0.617249	0.107191	0.315835	8.82212e-09	0.0127216	0.0179456	0.00720274	0.741732
RAB28	3.30655e-68	0	1.24836e-38	0	0.613343	0.106589	0.325314	8.08598e-09	0.0127572	0.0211535	0.00849366	0.741732
TF	6.42699e-68	0	1.32472e-38	0	0.620666	0.10757	0.318815	8.23018e-09	0.0127912	0.00451022	0.00181165	0.741732
SRP68	1.7017e-68	0	1.2295e-38	0	0.616149	0.104598	0.319684	9.05242e-09	0.0129264	-0.00337427	0.00135741	0.747235
POLR3D	3.50802e-68	0	1.30838e-38	0	0.611851	0.103142	0.316885	9.49317e-09	0.0130188	0.0100278	0.0040381	0.748365
SYNJ2	1.43636e-68	0	1.30013e-38	0	0.613937	0.106339	0.327111	8.85694e-09	0.0130377	-0.0026218	0.001056	0.748365
RIPK3	4.35051e-68	0	1.09975e-38	0	0.621034	0.106135	0.3209	9.78915e-09	0.0131858	0.00494698	0.00199576	0.748365
PYGL	6.53946e-68	0	1.22697e-38	0	0.616287	0.104515	0.326714	7.91286e-09	0.0132125	0.00262851	0.00106073	0.748365
DNM1	4.9064e-68	0	1.30547e-38	0	0.611129	0.105194	0.323509	7.76442e-09	0.0132217	0.00707078	0.00285369	0.748365
PPP1R14A	1.99087e-68	0	1.14567e-38	0	0.616535	0.105964	0.321962	7.84789e-09	0.0132487	-0.00530658	0.00214231	0.748365
NDUFB7	3.76943e-68	0	1.34208e-38	0	0.612834	0.104591	0.321164	9.29362e-09	0.0132622	0.0103821	0.00419196	0.748365
GAL3ST3	4.33336e-68	0	1.10552e-38	0	0.614012	0.106781	0.322761	8.92705e-09	0.0132936	0.00711072	0.00287205	0.748365
NANS	4.95154e-68	0	1.13925e-38	0	0.615446	0.105125	0.319482	8.51158e-09	0.0133631	0.00525575	0.00212442	0.748365
ZMYND19	2.64517e-68	0	1.41403e-38	0	0.617393	0.104933	0.320363	1.06509e-08	0.0134162	-0.0171128	0.00692111	0.748365
GLCCI1	7.07404e-68	0	1.36682e-38	0	0.623781	0.108014	0.321784	9.61068e-09	0.0134981	0.00580491	0.0023498	0.748365
RPL27A	3.44996e-68	0	1.38623e-38	0	0.612265	0.105592	0.323597	8.51575e-09	0.0135511	0.0269929	0.0109328	0.748365
TCEAL1	3.65451e-68	0	1.15412e-38	0	0.621663	0.10376	0.321897	8.32369e-09	0.0135804	0.069241	0.0280532	0.748365
ERLIN2	2.88581e-68	0	1.19413e-38	0	0.618893	0.106239	0.322835	8.78765e-09	0.0136014	-0.0185447	0.00751513	0.748365
RTBDN	2.0314e-68	0	1.45562e-38	0	0.608743	0.106727	0.322583	9.41689e-09	0.0136977	-0.00763082	0.00309551	0.748365
PPP4R3A	2.37531e-68	0	1.33783e-38	0	0.612304	0.106526	0.320499	8.74407e-09	0.0138221	-0.0110969	0.00450747	0.748365
CHAMP1	4.39894e-68	0	1.22425e-38	0	0.616353	0.105606	0.324477	8.74023e-09	0.0138399	0.00802632	0.00326085	0.748365
PLA2G2A	2.0761e-68	0	1.29441e-38	0	0.611387	0.108377	0.328658	7.756e-09	0.0138441	-0.011541	0.00468898	0.748365
TMEM203	3.5339e-68	0	1.13243e-38	0	0.616671	0.108422	0.322526	8.65385e-09	0.0138587	0.0325101	0.0132105	0.748365
MPND	5.15305e-68	0	1.30244e-38	0	0.614628	0.107074	0.317097	1.06246e-08	0.0139351	0.00470619	0.00191389	0.748365
TBC1D19	2.14826e-68	0	1.2908e-38	0	0.611103	0.105718	0.318221	1.01314e-08	0.0139654	-0.00904937	0.00368133	0.748365
SERPING1	3.79605e-68	0	1.14498e-38	0	0.618581	0.104449	0.329379	7.95255e-09	0.0139789	0.00913308	0.0037159	0.748365
IRX4	5.60819e-68	0	1.3145e-38	0	0.615347	0.10628	0.319996	8.80862e-09	0.0140003	0.00594177	0.00241802	0.748365
ZNF705A	2.05546e-68	0	1.17174e-38	0	0.611742	0.104041	0.324211	7.68041e-09	0.0140018	-0.0202195	0.0082285	0.748365
FGB	5.89467e-68	0	1.48391e-38	0	0.619552	0.103071	0.325372	8.80536e-09	0.0140344	0.00476144	0.00193837	0.748365
SPACA7	4.30728e-68	0	1.38686e-38	0	0.623393	0.106701	0.320531	8.56442e-09	0.0140581	0.0158065	0.0064364	0.748365
DHFR2	3.49205e-68	0	1.212e-38	0	0.614407	0.107306	0.321264	8.19874e-09	0.0140781	0.0293434	0.0119511	0.748365
FFAR4	3.78448e-68	0	1.4335e-38	0	0.621478	0.10859	0.32318	9.27431e-09	0.0141359	-0.00939352	0.00382812	0.748365
NIT1	4.1017e-68	0	1.22601e-38	0	0.615813	0.103394	0.321577	8.83642e-09	0.0141897	0.00846348	0.00345103	0.748365
IFT46	1.5453e-68	0	1.10758e-38	0	0.611551	0.106176	0.319552	9.87363e-09	0.0142389	-0.0050493	0.00205992	0.748365
ESCO1	4.25191e-68	0	1.33372e-38	0	0.613017	0.106521	0.322404	8.42348e-09	0.0142496	0.00785993	0.00320691	0.748365
C1orf159	3.13663e-68	0	1.40978e-38	0	0.617995	0.104	0.324101	8.79664e-09	0.0143684	-0.0110711	0.00452261	0.748365
LTA	3.35729e-68	0	1.25273e-38	0	0.616504	0.105263	0.322596	8.87731e-09	0.0144617	0.0366147	0.0149716	0.748365
TNK1	1.80127e-68	0	1.30737e-38	0	0.612756	0.102794	0.320988	8.47114e-09	0.0145596	-0.00341987	0.00139976	0.748365
IL17RC	1.93605e-68	0	1.0969e-38	0	0.61707	0.104309	0.324291	9.53618e-09	0.0145961	-0.00570548	0.00233613	0.748365
HACD2	3.49473e-68	0	1.39953e-38	0	0.614503	0.10536	0.322599	8.74746e-09	0.0146342	0.0183168	0.00750278	0.748365
KIAA0408	3.15075e-68	0	1.19638e-38	0	0.623825	0.104745	0.321382	6.79228e-09	0.0146753	-0.00866147	0.00354931	0.748365
NPIPB4	5.76964e-68	0	1.36748e-38	0	0.613523	0.106992	0.321627	9.65539e-09	0.0146861	0.0101865	0.0041747	0.748365
RAB4A	3.73825e-68	0	1.2373e-38	0	0.615208	0.103799	0.320595	9.37111e-09	0.014712	0.0105223	0.00431346	0.748365
E2F6	3.58366e-68	0	1.37578e-38	0	0.60971	0.107301	0.326	9.77494e-09	0.0147199	0.0164362	0.00673829	0.748365
RAB2A	2.95339e-68	0	1.26622e-38	0	0.616701	0.104602	0.316765	9.26459e-09	0.0147221	0.0472542	0.019373	0.748365
PTCH2	6.34223e-68	0	1.31961e-38	0	0.614897	0.103045	0.318385	6.8396e-09	0.0147741	0.00393784	0.00161526	0.748365
HAVCR2	1.75987e-68	0	9.77101e-39	0	0.6078	0.106732	0.316912	9.75215e-09	0.0148092	-0.00783142	0.0032135	0.748365
CCT8L2	3.95967e-68	0	1.14817e-38	0	0.613937	0.104187	0.325893	8.38585e-09	0.0148292	0.00536001	0.00219983	0.748365
WASF3	4.05146e-68	0	1.19771e-38	0	0.614651	0.104897	0.320586	9.59463e-09	0.0149205	0.00673492	0.00276664	0.748365
NTF3	3.58779e-68	0	1.2774e-38	0	0.614637	0.106041	0.325162	8.42609e-09	0.0149557	0.0199344	0.00819172	0.748365
P2RX4	1.84854e-68	0	1.27086e-38	0	0.607784	0.105334	0.319887	9.64606e-09	0.0149774	-0.00485196	0.00199426	0.748365
SLC38A7	2.54953e-68	0	1.28397e-38	0	0.614249	0.1058	0.317192	8.64952e-09	0.0150171	-0.00930581	0.00382641	0.748365
BAG3	4.74048e-68	0	1.38843e-38	0	0.618991	0.106348	0.327644	8.70918e-09	0.0150528	0.00792563	0.00326005	0.748365
ADAT3	2.61786e-68	0	1.31583e-38	0	0.616042	0.108028	0.316695	9.10672e-09	0.0151101	-0.00868932	0.00357621	0.748365
CBLC	1.79908e-68	0	1.25069e-38	0	0.614961	0.10788	0.320617	1.02974e-08	0.0151197	-0.00601151	0.00247435	0.748365
OASL	2.71499e-68	0	1.38545e-38	0	0.620191	0.107479	0.316652	8.95201e-09	0.0152007	-0.00660055	0.00271897	0.748365
LIFR	2.06527e-68	0	1.15528e-38	0	0.628678	0.10456	0.322388	9.4667e-09	0.0152203	-0.00491879	0.00202659	0.748365
FIGNL1	4.76469e-68	0	1.16953e-38	0	0.612222	0.106843	0.320054	9.45941e-09	0.0152473	0.00479257	0.00197511	0.748365
TMEM147	3.25836e-68	0	1.2992e-38	0	0.609764	0.10811	0.320322	8.53785e-09	0.0152859	0.0177669	0.00732485	0.748365
LIPI	4.97654e-68	0	1.38776e-38	0	0.62132	0.105331	0.325765	7.75412e-09	0.0153263	0.00831978	0.0034314	0.748365
VPS9D1	4.42638e-68	0	1.23402e-38	0	0.612473	0.107799	0.321885	9.05329e-09	0.0153401	0.00680468	0.00280689	0.748365
LCE3D	2.6922e-68	0	1.20083e-38	0	0.610777	0.105752	0.319871	8.85621e-09	0.01545	-0.0179569	0.00741503	0.748365
SYNM	8.7465e-68	0	1.43033e-38	0	0.613893	0.107416	0.319366	1.04684e-08	0.0154509	0.00305231	0.00126042	0.748365
ZEB1	2.0897e-68	0	1.21709e-38	0	0.619869	0.104804	0.323217	9.45046e-09	0.0154934	-0.00585392	0.00241831	0.748365
ERGIC2	2.95336e-68	0	1.42711e-38	0	0.617522	0.105016	0.322985	9.09197e-09	0.0154979	-0.0143338	0.00592171	0.748365
GANC	1.71266e-68	0	1.31394e-38	0	0.616335	0.104714	0.322774	1.0139e-08	0.0155026	-0.00371259	0.00153384	0.748365
KLHL8	3.9998e-68	0	1.23858e-38	0	0.618605	0.107244	0.322944	8.64116e-09	0.0155181	0.00778715	0.00321772	0.748365
KNG1	2.80394e-68	0	1.26907e-38	0	0.616616	0.105367	0.326878	8.62883e-09	0.0155271	-0.0102952	0.00425446	0.748365
TRIM27	5.11586e-68	0	1.34174e-38	0	0.623645	0.103412	0.31945	9.12967e-09	0.0155758	0.0103898	0.00429554	0.748769
MGEA5	4.51868e-68	0	1.42938e-38	0	0.615711	0.104213	0.32163	8.22838e-09	0.015622	0.0138648	0.00573479	0.749049
FCN3	4.72181e-68	0	1.45984e-38	0	0.614536	0.108091	0.3227	8.42061e-09	0.0157559	0.0108363	0.00448794	0.752021
PTER	5.92653e-68	0	1.30725e-38	0	0.621737	0.1057	0.325447	7.23198e-09	0.0158099	0.00460451	0.00190797	0.752021
PIGW	6.5164e-68	0	1.42413e-38	0	0.613259	0.107687	0.324364	8.77451e-09	0.0158348	0.00545532	0.00226106	0.752021
LOXL1	2.12758e-68	0	1.08066e-38	0	0.613516	0.10408	0.320458	6.82806e-09	0.0158492	-0.00554331	0.00229784	0.752021
CARD19	4.81549e-68	0	1.43183e-38	0	0.614599	0.105406	0.326101	8.44072e-09	0.0158866	0.00847175	0.00351301	0.752021
RSRC1	5.27535e-68	0	1.30327e-38	0	0.619347	0.10589	0.321372	9.35892e-09	0.0159451	0.00609624	0.00252935	0.752869
IPO7	4.37517e-68	0	1.28502e-38	0	0.621159	0.107254	0.322913	8.61653e-09	0.0160085	0.0126833	0.0052655	0.753944
NECAB2	6.0202e-68	0	1.31187e-38	0	0.624873	0.104596	0.319885	8.21792e-09	0.0161515	0.00553476	0.00230087	0.75771
PSMG1	4.58771e-68	0	1.23536e-38	0	0.608676	0.107674	0.31935	9.29436e-09	0.0161764	0.0062719	0.00260793	0.75771
ACOT13	4.28888e-68	0	1.33e-38	0	0.61518	0.105485	0.317803	1.23277e-08	0.0162224	0.00779574	0.00324296	0.75771
SNRNP70	3.51329e-68	0	1.39623e-38	0	0.614096	0.10369	0.318458	9.18106e-09	0.0162518	0.0151715	0.00631295	0.75771
POU2F3	4.0515e-68	0	1.18091e-38	0	0.61675	0.107694	0.31924	8.88156e-09	0.016455	0.00834868	0.00348051	0.760646
PPP1R1B	3.94308e-68	0	1.39784e-38	0	0.611943	0.106873	0.320283	8.36793e-09	0.0164676	0.0135652	0.0056559	0.760646
CHM	3.63786e-68	0	1.21091e-38	0	0.608122	0.105755	0.320912	9.01675e-09	0.0164826	0.00739473	0.00308361	0.760646
CD79A	4.177e-68	0	1.03798e-38	0	0.619129	0.104641	0.325968	8.39591e-09	0.0165326	0.00482998	0.00201504	0.760646
TCP10	4.92504e-68	0	1.23717e-38	0	0.612941	0.104471	0.317115	1.04873e-08	0.0165866	0.00755786	0.00315466	0.760646
CCDC61	5.46052e-68	0	1.38644e-38	0	0.620397	0.104988	0.319282	8.59089e-09	0.0166034	0.00575727	0.00240347	0.760646
MPL	4.3958e-68	0	1.04777e-38	0	0.623348	0.106068	0.319479	9.3676e-09	0.0166532	0.00726148	0.00303281	0.760646
PWWP2A	3.04436e-68	0	1.47413e-38	0	0.615349	0.102801	0.324646	9.15955e-09	0.0166766	-0.0119955	0.00501111	0.760646
ZNF793	2.04273e-68	0	1.12099e-38	0	0.613948	0.105639	0.326983	9.40519e-09	0.0166996	-0.00875344	0.0036575	0.760646
LPAR5	2.78931e-68	0	1.19151e-38	0	0.621543	0.104881	0.325376	8.9131e-09	0.0167257	-0.012962	0.0054173	0.760646
ZBED2	5.31107e-68	0	1.11284e-38	0	0.623103	0.105358	0.32059	8.76037e-09	0.0167657	0.00763917	0.00319385	0.760646
PIM3	4.2585e-68	0	1.31779e-38	0	0.612069	0.107079	0.320588	7.98013e-09	0.0169592	0.0127533	0.00534141	0.76755
GPR82	3.42754e-68	0	1.17614e-38	0	0.61735	0.105148	0.321708	8.55175e-09	0.0170056	0.0338082	0.0141657	0.767774
REPIN1	2.83576e-68	0	1.31326e-38	0	0.619171	0.107114	0.328018	8.56944e-09	0.0170547	-0.00934	0.00391523	0.768123
OSGIN1	1.52876e-68	0	1.18447e-38	0	0.615684	0.104939	0.321743	7.14382e-09	0.0171177	-0.00322199	0.00135139	0.769096
SET	3.86486e-68	0	1.17341e-38	0	0.621192	0.103858	0.318093	8.34911e-09	0.0171769	0.0281587	0.0118169	0.769892
NBR1	2.31458e-68	0	1.54757e-38	0	0.61231	0.107497	0.320577	9.49054e-09	0.0172418	-0.00411922	0.00172965	0.770326
CELF2	2.98026e-68	0	1.29574e-38	0	0.623563	0.102739	0.321386	8.5855e-09	0.0172696	-0.0179356	0.007533	0.770326
RFTN2	6.90008e-68	0	1.34114e-38	0	0.618046	0.105466	0.322259	7.52374e-09	0.0174627	0.0054487	0.00229241	0.777068
PLA2G12A	1.70329e-68	0	1.14484e-38	0	0.611857	0.106466	0.322907	1.07532e-08	0.017588	-0.00355447	0.00149712	0.780347
TMEM233	3.86939e-68	0	1.18478e-38	0	0.622661	0.107097	0.320731	9.38425e-09	0.0176205	0.0186121	0.00784155	0.780347
GNAI2	2.45753e-68	0	1.35757e-38	0	0.614781	0.10671	0.326126	8.64686e-09	0.0177253	-0.0121881	0.00513978	0.783121
MYLK4	2.30192e-68	0	1.34956e-38	0	0.616292	0.103859	0.3164	9.42711e-09	0.017772	-0.00550625	0.00232296	0.783318
C17orf53	4.6946e-68	0	1.19685e-38	0	0.617832	0.10686	0.319004	9.45366e-09	0.0179029	0.00816182	0.00344723	0.786403
HDAC8	4.48861e-68	0	1.4414e-38	0	0.618431	0.105359	0.321762	8.88928e-09	0.0179326	0.0479011	0.0202367	0.786403
CRLF3	2.25855e-68	0	1.25987e-38	0	0.612645	0.105119	0.318876	9.67792e-09	0.0179691	-0.00947995	0.00400627	0.786403
SFT2D1	2.6482e-68	0	1.07458e-38	0	0.620322	0.106603	0.325605	9.83959e-09	0.0180771	-0.0220983	0.00934762	0.7886
OR5R1	1.72255e-68	0	1.30099e-38	0	0.61258	0.104319	0.322947	8.53629e-09	0.0181134	-0.00662944	0.00280514	0.7886
PHLDA1	3.65203e-68	0	1.24263e-38	0	0.60994	0.106536	0.32353	8.06064e-09	0.0181468	0.0102931	0.0043566	0.7886
DNAJC3	5.33824e-68	0	1.39368e-38	0	0.619162	0.108295	0.327625	8.57845e-09	0.0182503	0.00904024	0.00382975	0.788687
MAP2K2	4.42224e-68	0	1.43761e-38	0	0.612258	0.10531	0.317452	8.87176e-09	0.0182768	0.0102507	0.00434355	0.788687
SLBP	2.47699e-68	0	1.33622e-38	0	0.619335	0.102524	0.317854	9.59021e-09	0.0183177	-0.00689729	0.00292362	0.788687
MDC1	1.78085e-68	0	1.3299e-38	0	0.615427	0.107178	0.32008	9.15968e-09	0.0183188	-0.00472246	0.00200177	0.788687
CXorf66	3.45317e-68	0	1.25435e-38	0	0.617218	0.108137	0.322921	9.32298e-09	0.0184238	0.0469462	0.0199177	0.791372
TSC2	1.84924e-68	0	1.39744e-38	0	0.623199	0.110327	0.323773	7.68608e-09	0.0186278	-0.00281001	0.00119426	0.793669
IGFBP1	2.57209e-68	0	1.26448e-38	0	0.619177	0.104431	0.323299	8.05416e-09	0.01863	-0.00660133	0.00280564	0.793669
EBAG9	2.75413e-68	0	1.29783e-38	0	0.612487	0.10587	0.321352	8.9209e-09	0.0187068	-0.0203139	0.00863925	0.793669
ZNF219	2.93709e-68	0	1.32171e-38	0	0.623034	0.105734	0.321428	1.01968e-08	0.0187743	-0.00856732	0.00364566	0.793669
BCAS4	2.53274e-68	0	1.26939e-38	0	0.618843	0.107301	0.319759	8.70436e-09	0.0187912	-0.0100788	0.00428946	0.793669
OR6P1	3.84961e-68	0	1.24521e-38	0	0.614253	0.102044	0.319864	8.85948e-09	0.018853	0.00432398	0.00184121	0.793669
OR1S1	6.55514e-68	0	1.26514e-38	0	0.618726	0.103771	0.317315	8.32958e-09	0.0188604	0.00439791	0.0018728	0.793669
SYT16	2.46024e-68	0	1.45938e-38	0	0.611664	0.105223	0.318561	9.26201e-09	0.0188686	-0.00865202	0.00368462	0.793669
ZNF461	2.46683e-68	0	1.22505e-38	0	0.620785	0.106135	0.326077	8.48956e-09	0.0189012	-0.00676961	0.00288375	0.793669
LSM4	4.45896e-68	0	1.32262e-38	0	0.625055	0.106145	0.326836	9.22426e-09	0.0189256	0.0196824	0.00838613	0.793669
CEP126	4.40931e-68	0	1.26717e-38	0	0.619028	0.105398	0.321201	9.65796e-09	0.0190038	0.00715671	0.00305128	0.793669
CNN2	3.74847e-68	0	1.25498e-38	0	0.610132	0.104423	0.322474	8.91886e-09	0.0191859	0.010364	0.00442541	0.793669
KIR3DL1	2.12963e-68	0	1.247e-38	0	0.614128	0.107342	0.329199	8.00728e-09	0.0192076	0.0275009	0.011745	0.793669
IFT88	3.9097e-68	0	1.25154e-38	0	0.612768	0.107686	0.316372	8.6425e-09	0.0192572	0.00752634	0.00321564	0.793669
H1FX	3.67426e-68	0	1.15777e-38	0	0.622027	0.103569	0.316709	8.90705e-09	0.0192613	0.020164	0.00861539	0.793669
AGFG1	3.7766e-68	0	1.37369e-38	0	0.607559	0.104822	0.323978	8.05168e-09	0.0192855	0.0113302	0.004842	0.793669
POFUT1	4.56025e-68	0	1.17815e-38	0	0.61809	0.106906	0.323193	7.83594e-09	0.019349	0.00705922	0.00301836	0.793669
DCDC2	3.77812e-68	0	1.26962e-38	0	0.614431	0.105067	0.318747	8.47905e-09	0.0193787	0.0121874	0.00521234	0.793669
SAMD9	2.17211e-68	0	1.23198e-38	0	0.615071	0.107724	0.319989	8.79686e-09	0.0193863	-0.00483553	0.0020682	0.793669
ZDHHC11B	2.78969e-68	0	1.17856e-38	0	0.61266	0.104005	0.320406	9.04407e-09	0.0194113	-0.0155195	0.0066392	0.793669
POLR3H	3.92207e-68	0	1.04238e-38	0	0.614221	0.107304	0.322802	9.08896e-09	0.0194119	0.00988639	0.00422938	0.793669
PSEN1	2.74748e-68	0	1.23171e-38	0	0.613926	0.106276	0.32149	8.72146e-09	0.0194535	-0.0173275	0.0074152	0.793669
OR4C16	5.76049e-68	0	1.15339e-38	0	0.619502	0.105201	0.326589	8.65066e-09	0.0194691	0.00644549	0.00275867	0.793669
DPP8	2.44452e-68	0	1.16625e-38	0	0.615016	0.107035	0.324149	8.99086e-09	0.0195309	-0.00781728	0.00334749	0.793669
NEK2	4.35721e-68	0	1.31472e-38	0	0.620332	0.10839	0.319639	7.99796e-09	0.0195466	0.00946871	0.00405518	0.793669
FCHO1	1.67481e-68	0	1.15637e-38	0	0.618649	0.10692	0.327638	9.90762e-09	0.0197003	-0.00352933	0.00151341	0.794163
ESM1	3.79874e-68	0	1.40698e-38	0	0.617684	0.105563	0.31748	8.6316e-09	0.019721	0.0277258	0.0118911	0.794163
DPF1	3.17133e-68	0	1.28235e-38	0	0.626547	0.105522	0.323073	8.95305e-09	0.0197418	-0.0107317	0.00460344	0.794163
SLC17A4	2.75769e-68	0	1.26687e-38	0	0.620116	0.103856	0.32074	8.57191e-09	0.0197633	-0.00772178	0.00331288	0.794163
FAM102A	4.64074e-68	0	1.23104e-38	0	0.616573	0.106679	0.320829	8.06801e-09	0.0197728	0.00585553	0.00251239	0.794163
SLC4A8	4.64767e-68	0	1.35886e-38	0	0.617565	0.105846	0.327172	8.93333e-09	0.0198279	0.00829159	0.00355921	0.794659
TNFRSF11A	1.83797e-68	0	1.26675e-38	0	0.610757	0.106922	0.318739	1.05183e-08	0.0200194	-0.00557758	0.00239792	0.800602
LRRC27	4.07628e-68	0	1.12952e-38	0	0.622959	0.103522	0.324683	8.5372e-09	0.0201094	0.00935794	0.00402609	0.801001
H3F3C	3.92049e-68	0	1.42819e-38	0	0.613754	0.105009	0.315189	7.94059e-09	0.0202599	0.0157906	0.00680183	0.801001
GNL2	2.06934e-68	0	1.14143e-38	0	0.616926	0.104858	0.321036	1.01417e-08	0.0202758	-0.00546746	0.00235541	0.801001
POLRMT	1.958e-68	0	1.25056e-38	0	0.615235	0.106677	0.322223	9.02328e-09	0.0203105	-0.00331223	0.00142732	0.801001
MSN	4.24583e-68	0	1.46619e-38	0	0.614212	0.105339	0.319573	8.90176e-09	0.0203165	0.0198217	0.00854209	0.801001
TTC12	3.96466e-68	0	1.22851e-38	0	0.616893	0.103754	0.319988	9.39926e-09	0.0203561	0.00611025	0.00263402	0.801001
ANP32B	4.17634e-68	0	1.56368e-38	0	0.619049	0.106694	0.318835	9.06472e-09	0.0204965	0.0233193	0.0100638	0.801001
MTHFD2L	2.20463e-68	0	1.42432e-38	0	0.609513	0.104762	0.326031	7.75058e-09	0.0205168	-0.00630798	0.00272273	0.801001
ABCB6	1.3432e-68	0	1.23881e-38	0	0.61201	0.107486	0.325614	1.00213e-08	0.0205677	-0.0021838	0.000942978	0.801001
EXOSC5	4.14727e-68	0	1.19928e-38	0	0.622496	0.103071	0.323255	8.94163e-09	0.0206324	0.008775	0.00379104	0.801001
SEMA3A	2.49339e-68	0	1.31608e-38	0	0.616692	0.105196	0.323834	8.83877e-09	0.0206445	-0.00610181	0.0026364	0.801001
CRBN	2.08866e-68	0	1.19441e-38	0	0.610521	0.107171	0.319612	9.59173e-09	0.020651	-0.00749979	0.00324059	0.801001
RNF215	2.01387e-68	0	1.23247e-38	0	0.61048	0.105262	0.318488	9.6773e-09	0.0206756	-0.00450536	0.0019471	0.801001
PAPD4	2.35052e-68	0	1.23554e-38	0	0.61974	0.105403	0.325774	9.45109e-09	0.0207017	-0.00766383	0.00331279	0.801001
GYPE	3.17287e-68	0	1.33847e-38	0	0.615362	0.106855	0.323354	8.91363e-09	0.0207033	-0.0537115	0.0232178	0.801001
TAS2R38	3.67297e-68	0	1.11012e-38	0	0.620178	0.104488	0.319575	8.85629e-09	0.0207598	0.0160819	0.0069548	0.801001
OR4K17	2.98205e-68	0	1.33804e-38	0	0.620403	0.106801	0.326226	8.71478e-09	0.0207632	0.0145741	0.00630289	0.801001
ENPP3	2.0925e-68	0	1.04904e-38	0	0.619794	0.106564	0.332773	9.37078e-09	0.0208552	-0.0040036	0.0017327	0.802882
MAD2L1	5.4013e-68	0	1.36948e-38	0	0.625427	0.104882	0.323901	9.22908e-09	0.0209334	0.0146074	0.00632573	0.803209
TJP3	1.42956e-68	0	1.1494e-38	0	0.609679	0.107954	0.314342	9.46317e-09	0.0209503	-0.00212538	0.000920516	0.803209
SH3BGRL	3.94245e-68	0	1.2544e-38	0	0.617541	0.104458	0.322383	1.02627e-08	0.021006	0.0271368	0.0117582	0.803687
AKAP11	2.08904e-68	0	1.34433e-38	0	0.614438	0.105163	0.318802	1.06451e-08	0.0211521	-0.00302796	0.00131349	0.805298
TMOD3	2.31856e-68	0	1.30593e-38	0	0.611669	0.105781	0.323791	9.20704e-09	0.021177	-0.00690076	0.00299403	0.805298
GUCA1A	2.0712e-68	0	1.17977e-38	0	0.612325	0.106254	0.320868	8.38402e-09	0.0211897	-0.00856291	0.00371555	0.805298
FAM107A	4.80253e-68	0	1.21959e-38	0	0.618832	0.10564	0.327625	7.98195e-09	0.0212442	0.00668985	0.00290403	0.805298
TMEM196	2.67223e-68	0	1.20805e-38	0	0.616548	0.107304	0.320095	9.11509e-09	0.0213139	-0.0185995	0.00807831	0.805298
CAMKMT	2.97824e-68	0	1.24306e-38	0	0.62062	0.106821	0.320906	8.42978e-09	0.0213479	-0.00738438	0.00320809	0.805298
PSORS1C2	4.25929e-68	0	1.34223e-38	0	0.620303	0.105608	0.320327	9.07658e-09	0.0213603	0.0103291	0.00448784	0.805298
TUBA3D	2.50605e-68	0	1.29125e-38	0	0.615979	0.104042	0.319363	8.76774e-09	0.0214505	-0.00688535	0.00299365	0.805298
RIPOR1	6.19694e-68	0	1.23476e-38	0	0.612245	0.106042	0.320694	7.44613e-09	0.021494	0.00383105	0.00166624	0.805298
TRAF2	3.78176e-68	0	1.18689e-38	0	0.611359	0.10463	0.327763	8.12049e-09	0.0215324	0.00809142	0.00352024	0.805298
TP53INP1	4.56149e-68	0	1.39264e-38	0	0.622775	0.107898	0.324269	8.72515e-09	0.0215459	0.013092	0.00569636	0.805298
FZD7	2.69619e-68	0	1.26711e-38	0	0.615293	0.106269	0.325226	9.48096e-09	0.021586	-0.0152988	0.0066586	0.805298
TMEM145	5.63299e-68	0	1.33733e-38	0	0.619065	0.104227	0.321131	7.79554e-09	0.0216725	0.00582356	0.0025363	0.805298
LEPR	2.43944e-68	0	1.36766e-38	0	0.61485	0.102231	0.321165	1.03936e-08	0.0216799	-0.00731958	0.00318803	0.805298
ETV3L	1.96122e-68	0	1.36354e-38	0	0.61105	0.104092	0.318682	9.51073e-09	0.0216991	-0.00527389	0.00229737	0.805298
RNASE2	4.40336e-68	0	1.43636e-38	0	0.618014	0.106007	0.326135	9.02443e-09	0.0217949	0.00782756	0.00341227	0.806042
TRIM23	3.86593e-68	0	1.22415e-38	0	0.61491	0.104695	0.318146	8.4191e-09	0.0218061	0.0116646	0.00508537	0.806042
ZNF322	2.5314e-68	0	1.22354e-38	0	0.614737	0.107164	0.323124	8.76774e-09	0.0218743	-0.0142905	0.0062334	0.806956
ALOX15B	1.8407e-68	0	1.21642e-38	0	0.611389	0.105472	0.320712	8.48406e-09	0.0219423	-0.00402141	0.00175501	0.807859
LYN	3.44267e-68	0	1.10568e-38	0	0.61627	0.107733	0.324604	8.87682e-09	0.0222417	0.0154788	0.00677042	0.816017
CENPH	2.29831e-68	0	1.19263e-38	0	0.609655	0.105148	0.316812	9.61821e-09	0.0222518	-0.0164163	0.00718104	0.816017
AGPAT3	2.91749e-68	0	1.31968e-38	0	0.614189	0.106703	0.323706	8.43156e-09	0.0223602	-0.013464	0.00589437	0.818376
XRCC6	3.7382e-68	0	1.2018e-38	0	0.610579	0.106391	0.320899	1.00518e-08	0.022532	0.014366	0.00629729	0.823039
ASGR1	4.03598e-68	0	1.22212e-38	0	0.617735	0.105908	0.318437	8.58654e-09	0.0226218	0.00949757	0.00416599	0.824697
CCDC168	2.00686e-68	0	1.23951e-38	0	0.620123	0.105546	0.326432	1.04356e-08	0.0227556	-0.00531386	0.00233316	0.825292
PRPF38A	2.50047e-68	0	1.29496e-38	0	0.615098	0.10347	0.320228	9.50659e-09	0.0228871	-0.012723	0.00559171	0.825292
HIST1H2AI	5.15402e-68	0	1.21022e-38	0	0.629874	0.105877	0.31966	9.12084e-09	0.0229043	0.0215911	0.0094904	0.825292
LDLRAD3	4.39803e-68	0	1.22569e-38	0	0.618917	0.10485	0.328691	8.10979e-09	0.0229951	0.00607951	0.00267403	0.825292
PHKA2	1.80819e-68	0	1.18125e-38	0	0.607749	0.104213	0.325173	9.40955e-09	0.023004	-0.00880555	0.00387331	0.825292
SMIM14	3.16148e-68	0	1.33475e-38	0	0.620106	0.106144	0.323924	9.41336e-09	0.0230487	-0.0212962	0.00937063	0.825292
PRPH2	4.9861e-68	0	1.25633e-38	0	0.629272	0.105729	0.324043	9.20688e-09	0.0230785	0.00756975	0.00333152	0.825292
MEI1	5.21753e-68	0	1.3567e-38	0	0.614362	0.107182	0.317489	9.8406e-09	0.0231358	0.00505444	0.00222544	0.825292
HNRNPU	3.63925e-68	0	1.20545e-38	0	0.611949	0.106006	0.316835	9.21495e-09	0.02316	0.0130065	0.00572769	0.825292
MASTL	4.12315e-68	0	1.2648e-38	0	0.609908	0.10693	0.323535	7.77064e-09	0.0232138	0.00620104	0.00273183	0.825292
ANKRD28	4.88916e-68	0	1.30497e-38	0	0.620814	0.107023	0.325127	9.94541e-09	0.0232309	0.00534761	0.00235615	0.825292
SVOP	4.41015e-68	0	1.21117e-38	0	0.62772	0.103791	0.322099	8.70352e-09	0.0232973	0.0120024	0.00529078	0.825292
SPATA25	5.05695e-68	0	1.25727e-38	0	0.618434	0.106324	0.32463	8.53981e-09	0.0233225	0.00607553	0.00267865	0.825292
ZNF354B	5.86166e-68	0	1.11441e-38	0	0.622577	0.102764	0.323721	8.80762e-09	0.0233436	0.0056254	0.00248057	0.825292
RNH1	6.51694e-68	0	1.41206e-38	0	0.616992	0.107207	0.32958	9.03275e-09	0.0233583	0.00505936	0.0022312	0.825292
KRTAP5-7	4.21633e-68	0	1.26179e-38	0	0.605586	0.106598	0.319855	9.09897e-09	0.0234454	0.0109457	0.00483017	0.825292
SPACA3	2.65345e-68	0	1.29872e-38	0	0.613138	0.106621	0.323706	1.03938e-08	0.023449	-0.0115161	0.00508199	0.825292
MMP7	2.8145e-68	0	1.35529e-38	0	0.616733	0.104323	0.321045	9.46559e-09	0.023474	-0.0145231	0.00641013	0.825292
INSM2	4.52526e-68	0	1.30241e-38	0	0.61494	0.1061	0.315118	1.01988e-08	0.023538	0.00701169	0.0030962	0.825292
DMAP1	4.4566e-68	0	1.2083e-38	0	0.617047	0.107005	0.318174	8.42324e-09	0.0235394	0.00721123	0.00318434	0.825292
QSOX2	1.77979e-68	0	1.22958e-38	0	0.615404	0.104857	0.318217	1.04639e-08	0.0235722	-0.00346517	0.00153051	0.825292
GCGR	2.21508e-68	0	1.20707e-38	0	0.619086	0.104336	0.326784	8.41758e-09	0.0236441	-0.00621586	0.00274687	0.826253
SPINK1	4.722e-68	0	1.18765e-38	0	0.62272	0.106824	0.320924	1.12167e-08	0.0238433	-0.00799731	0.00353915	0.831645
TYRP1	6.26281e-68	0	1.25422e-38	0	0.622757	0.104175	0.326259	8.04803e-09	0.0241177	0.00422036	0.00187133	0.836864
PTPN13	9.73822e-68	0	1.16902e-38	0	0.612471	0.107071	0.324617	8.29622e-09	0.0241838	0.00215678	0.000956775	0.836864
CFAP52	2.00764e-68	0	1.25098e-38	0	0.619769	0.10288	0.318416	9.67345e-09	0.0242957	-0.00387852	0.00172192	0.836864
ADAMTS8	1.93541e-68	0	1.33073e-38	0	0.615257	0.105861	0.324395	9.64896e-09	0.0243175	-0.00304427	0.00135175	0.836864
LPIN1	4.39149e-68	0	1.15655e-38	0	0.616678	0.107822	0.318288	9.194e-09	0.0243382	0.00578777	0.00257032	0.836864
PRAMEF17	3.01709e-68	0	1.43204e-38	0	0.616458	0.105737	0.326383	8.96258e-09	0.0243487	-0.00838375	0.00372345	0.836864
RPA2	4.70349e-68	0	1.21874e-38	0	0.616858	0.10612	0.317648	1.03019e-08	0.0243502	0.0109783	0.00487583	0.836864
ALDH1L1	1.94598e-68	0	1.27087e-38	0	0.622636	0.107088	0.323629	8.3506e-09	0.0243537	-0.00301119	0.0013374	0.836864
PCDHA7	2.6641e-68	0	1.27233e-38	0	0.619284	0.104046	0.323058	9.30835e-09	0.0245555	-0.00708112	0.00314948	0.841324
ZNF69	4.42205e-68	0	1.32755e-38	0	0.618251	0.104124	0.322374	1.02597e-08	0.0245741	0.0163366	0.007267	0.841324
EML6	6.17528e-68	0	1.21003e-38	0	0.612565	0.105724	0.318836	8.66328e-09	0.024687	0.00295777	0.00131674	0.842591
ATP2B2	5.85315e-68	0	1.17156e-38	0	0.615473	0.108799	0.321319	9.37434e-09	0.0247831	0.00364183	0.00162235	0.842591
VEGFA	4.51135e-68	0	1.26078e-38	0	0.61818	0.105154	0.321784	8.36451e-09	0.0248217	0.00772858	0.00344382	0.842591
DONSON	2.03843e-68	0	1.2373e-38	0	0.614509	0.107298	0.318719	9.29153e-09	0.0248274	-0.00407832	0.00181735	0.842591
DENND2C	6.98632e-68	0	1.19349e-38	0	0.617656	0.105136	0.31944	8.8005e-09	0.0249354	0.0025829	0.00115183	0.842591
C5orf63	3.3314e-68	0	1.3396e-38	0	0.611115	0.105749	0.320118	8.50602e-09	0.0249409	0.0193612	0.00863438	0.842591
PPA1	2.95397e-68	0	1.33015e-38	0	0.618313	0.103927	0.318569	8.79569e-09	0.0249546	-0.0119471	0.00532845	0.842591
HLA-DPB1	2.24963e-68	0	1.23312e-38	0	0.612969	0.106913	0.319758	8.62035e-09	0.0249744	-0.0140563	0.00627003	0.842591
TMEM200B	2.72646e-68	0	1.17641e-38	0	0.62238	0.105769	0.32645	8.90383e-09	0.025152	-0.00784496	0.00350365	0.845695
IL17RB	6.15579e-68	0	1.25092e-38	0	0.624476	0.109355	0.333413	8.4994e-09	0.0251717	0.00411362	0.00183744	0.845695
ZNF33B	2.01873e-68	0	1.19159e-38	0	0.608206	0.105689	0.325861	8.04428e-09	0.0253336	-0.00709981	0.0031748	0.845695
SCAF1	5.65565e-68	0	1.24757e-38	0	0.620695	0.104328	0.318882	9.08479e-09	0.025374	0.00444491	0.00198817	0.845695
BRD2	7.16528e-68	0	1.28962e-38	0	0.619744	0.104711	0.318748	7.76849e-09	0.0254408	0.00567202	0.00253819	0.845695
TMEM141	3.54518e-68	0	1.17586e-38	0	0.615477	0.10485	0.320551	8.33275e-09	0.0254708	0.0153004	0.00684823	0.845695
B3GAT1	3.55331e-68	0	1.18502e-38	0	0.613086	0.104248	0.31816	9.18265e-09	0.0255246	0.00973622	0.00435938	0.845695
TXLNB	3.80184e-68	0	1.08e-38	0	0.61431	0.103204	0.318213	9.08709e-09	0.025532	0.00531234	0.00237872	0.845695
SLC5A10	5.85416e-68	0	1.24051e-38	0	0.6203	0.105341	0.319179	1.01697e-08	0.0255792	0.00311274	0.00139425	0.845695
CNPPD1	4.61928e-68	0	1.24769e-38	0	0.621222	0.105507	0.32063	9.22009e-09	0.0257165	0.00663665	0.00297542	0.845695
MYLPF	3.77651e-68	0	1.45164e-38	0	0.612355	0.107506	0.328816	8.8554e-09	0.0257773	0.0173497	0.00778163	0.845695
AXDND1	6.5315e-68	0	1.23205e-38	0	0.621257	0.106186	0.320684	8.24044e-09	0.0258139	0.00405945	0.00182118	0.845695
TLN1	2.15302e-68	0	1.24272e-38	0	0.620956	0.106192	0.324182	8.45938e-09	0.0258436	-0.00381349	0.00171118	0.845695
NAIF1	2.45676e-68	0	1.28696e-38	0	0.619107	0.105947	0.322308	7.72628e-09	0.0258748	-0.00619542	0.00278058	0.845695
LMTK3	5.81854e-68	0	1.41834e-38	0	0.617562	0.105354	0.316806	8.82357e-09	0.0258909	0.00547667	0.00245826	0.845695
LRP2	1.31047e-67	0	1.47941e-38	0	0.621408	0.1034	0.325972	8.09262e-09	0.0261032	0.00231583	0.00104096	0.845695
SERPINA12	2.04231e-68	0	1.34804e-38	0	0.615353	0.107132	0.32104	1.00433e-08	0.0261095	-0.00195303	0.000877925	0.845695
BTBD2	1.88285e-68	0	1.30713e-38	0	0.621259	0.103197	0.324265	1.002e-08	0.0261467	-0.0052562	0.00236335	0.845695
BMP2	2.87593e-68	0	1.25157e-38	0	0.614683	0.109446	0.319092	8.1746e-09	0.0261512	-0.011326	0.00509268	0.845695
CSNK2A2	4.28226e-68	0	1.27513e-38	0	0.626106	0.105747	0.327492	8.81664e-09	0.0261929	0.0138547	0.00623142	0.845695
NR1H3	4.61539e-68	0	1.40968e-38	0	0.619411	0.105656	0.320041	9.09404e-09	0.0262029	0.00629339	0.00283076	0.845695
SLC6A5	1.50186e-68	0	1.33062e-38	0	0.601941	0.106564	0.322271	8.39081e-09	0.0262244	-0.00389204	0.00175089	0.845695
L3MBTL3	2.52335e-68	0	1.34913e-38	0	0.612448	0.106436	0.316727	8.78678e-09	0.0262663	-0.00758601	0.00341362	0.845695
RSRP1	2.23835e-68	0	1.40522e-38	0	0.616992	0.107274	0.315906	8.71918e-09	0.0263135	-0.00401901	0.00180908	0.845695
HPF1	4.98211e-68	0	1.25481e-38	0	0.620011	0.10451	0.324218	1.07153e-08	0.0263138	0.00528759	0.00238011	0.845695
EPHA4	2.47326e-68	0	1.2455e-38	0	0.612498	0.106882	0.315773	8.90401e-09	0.0263355	-0.00721371	0.00324759	0.845695
SNX11	3.66512e-68	0	1.33169e-38	0	0.612145	0.105627	0.316333	8.39211e-09	0.0263491	0.0151911	0.00683959	0.845695
TEPP	3.48737e-68	0	1.27208e-38	0	0.619337	0.104562	0.328137	8.89354e-09	0.026368	0.00860424	0.00387444	0.845695
TRIM11	2.30062e-68	0	1.25844e-38	0	0.612556	0.10504	0.324313	9.40065e-09	0.0264255	-0.0104687	0.00471577	0.845695
SCAMP3	2.3095e-68	0	1.2737e-38	0	0.610162	0.105818	0.32481	9.1877e-09	0.0265761	-0.00851604	0.00384001	0.845695
STMN1	3.72569e-68	0	1.41246e-38	0	0.611414	0.104528	0.321002	8.93515e-09	0.026661	0.0384144	0.0173313	0.845695
HSP90AB1	4.35069e-68	0	1.3193e-38	0	0.619586	0.105685	0.322119	8.45952e-09	0.0266996	0.0080874	0.0036497	0.845695
MICB	3.99605e-68	0	1.13144e-38	0	0.61936	0.105484	0.31602	9.74484e-09	0.0267072	0.0154968	0.00699379	0.845695
ERBIN	4.9189e-68	0	1.15724e-38	0	0.617504	0.103808	0.3191	8.53249e-09	0.026708	0.0045357	0.002047	0.845695
NAT10	1.87314e-68	0	1.37038e-38	0	0.61374	0.106144	0.32058	9.51286e-09	0.0267161	-0.00322856	0.00145715	0.845695
GPR158	5.74475e-68	0	1.39552e-38	0	0.613884	0.106317	0.320532	8.33318e-09	0.0267267	0.00492435	0.00222267	0.845695
COQ6	4.32119e-68	0	1.36235e-38	0	0.611704	0.104063	0.319237	9.08338e-09	0.0267607	0.00603609	0.00272508	0.845695
ZNF564	2.63937e-68	0	1.33851e-38	0	0.618072	0.104113	0.32151	9.2242e-09	0.0267983	-0.00909523	0.00410719	0.845695
PFKFB3	2.05958e-68	0	1.2785e-38	0	0.607162	0.104245	0.317237	7.73866e-09	0.0270572	-0.00651344	0.00294631	0.852416
ASRGL1	3.85478e-68	0	1.1642e-38	0	0.617708	0.105256	0.32064	9.71246e-09	0.0271259	0.00797549	0.00360927	0.853131
TTC23	2.64785e-68	0	1.36391e-38	0	0.615815	0.105076	0.324547	9.73064e-09	0.0272773	-0.00943881	0.0042757	0.854405
OR9Q1	4.02766e-68	0	1.17048e-38	0	0.619747	0.103753	0.321804	8.6231e-09	0.0272921	0.00750931	0.00340198	0.854405
SPRTN	3.73041e-68	0	1.33111e-38	0	0.629095	0.105093	0.326954	8.90317e-09	0.0273676	-0.00891706	0.00404171	0.854405
GIT2	5.18296e-68	0	1.29093e-38	0	0.616327	0.105488	0.318823	8.98653e-09	0.0274786	0.00532935	0.0024173	0.854405
RNF43	2.1148e-68	0	1.16912e-38	0	0.614777	0.107496	0.321435	9.66872e-09	0.0275611	-0.00527516	0.00239399	0.854405
KCNE5	4.43079e-68	0	1.27058e-38	0	0.621837	0.104878	0.318967	8.27716e-09	0.0276041	0.0107117	0.00486259	0.854405
NHLH1	2.85335e-68	0	1.24956e-38	0	0.611733	0.107523	0.32021	9.89179e-09	0.027686	-0.0200628	0.00911227	0.854405
ARID2	4.99463e-68	0	1.2515e-38	0	0.614787	0.107939	0.32327	9.34641e-09	0.0277587	0.00418159	0.00190012	0.854405
KATNBL1	4.13322e-68	0	1.24846e-38	0	0.614267	0.1063	0.316493	9.30553e-09	0.0277978	0.0149103	0.00677694	0.854405
CCL19	3.12599e-68	0	1.33283e-38	0	0.61614	0.107037	0.320686	9.11887e-09	0.0278057	-0.0279155	0.0126886	0.854405
RPS10	3.66177e-68	0	1.3353e-38	0	0.620945	0.106276	0.322667	8.74027e-09	0.0278239	0.0875672	0.0398072	0.854405
ZNF705D	4.38394e-68	0	1.33519e-38	0	0.614957	0.105136	0.320672	1.06299e-08	0.0278409	0.0095047	0.00432121	0.854405
UPF3A	4.94372e-68	0	1.14824e-38	0	0.619449	0.107436	0.320622	1.07723e-08	0.027882	0.00554538	0.00252181	0.854405
OR13C8	4.42642e-68	0	1.31726e-38	0	0.622448	0.104635	0.320073	8.2547e-09	0.027934	0.0110645	0.00503335	0.854405
RAD51D	3.98896e-68	0	1.34261e-38	0	0.615593	0.105708	0.321892	9.33466e-09	0.0280388	0.00729749	0.00332193	0.854405
SND1	4.94964e-68	0	1.24463e-38	0	0.612476	0.1058	0.323883	8.15696e-09	0.0280977	0.00623374	0.00283876	0.854405
ENO1	4.56878e-68	0	1.4669e-38	0	0.611577	0.10745	0.327229	8.92492e-09	0.0281213	0.00645051	0.00293791	0.854405
DNPH1	3.04243e-68	0	1.29644e-38	0	0.619016	0.105057	0.319086	9.26112e-09	0.0281238	-0.0130273	0.00593343	0.854405
HSP90B1	2.86881e-68	0	1.35614e-38	0	0.619306	0.107023	0.322055	9.06763e-09	0.0281484	-0.00696547	0.003173	0.854405
HSPA6	4.1566e-68	0	1.12159e-38	0	0.612227	0.107389	0.323467	9.17223e-09	0.0282375	0.00572844	0.00261096	0.854405
DAOA	3.4633e-68	0	1.31863e-38	0	0.617081	0.10412	0.317507	9.147e-09	0.0282987	0.0523824	0.0238846	0.854405
STRIP1	2.91845e-68	0	1.64485e-38	0	0.614208	0.108293	0.320693	1.02219e-08	0.028302	-0.00679699	0.00309927	0.854405
FAM228B	3.18379e-68	0	1.17665e-38	0	0.611647	0.104636	0.322759	8.20088e-09	0.0283429	0.01474	0.00672281	0.854405
CA6	3.18482e-68	0	1.38544e-38	0	0.618085	0.106421	0.321975	8.97807e-09	0.0283608	-0.0143965	0.00656692	0.854405
MPPED2	3.96063e-68	0	1.52277e-38	0	0.615121	0.104702	0.319204	8.78318e-09	0.028441	0.0151538	0.00691586	0.854405
PRDM8	3.87264e-68	0	1.18209e-38	0	0.611744	0.105822	0.320607	8.4426e-09	0.0285147	0.00779065	0.00355712	0.854405
ZNF730	4.14482e-68	0	1.28639e-38	0	0.615393	0.106003	0.318891	8.76289e-09	0.0285839	0.0100174	0.00457581	0.854405
GNAI1	2.40164e-68	0	1.2689e-38	0	0.619415	0.106258	0.320622	9.23709e-09	0.0286596	-0.00637974	0.00291557	0.854405
CREB3	2.54548e-68	0	1.25327e-38	0	0.616943	0.105642	0.321133	8.8849e-09	0.0286709	-0.00774972	0.00354191	0.854405
MZT2A	4.86227e-68	0	1.25695e-38	0	0.618753	0.104017	0.323574	7.94322e-09	0.0286722	0.00562367	0.00257025	0.854405
TSNARE1	1.89539e-68	0	1.33989e-38	0	0.609952	0.10668	0.324945	8.59418e-09	0.0287922	-0.00351877	0.00160943	0.854405
PTRH1	4.2077e-68	0	1.32176e-38	0	0.617142	0.103522	0.317958	9.31517e-09	0.0288031	0.00919294	0.004205	0.854405
ULBP2	3.74197e-68	0	1.23168e-38	0	0.617956	0.106283	0.321187	8.28842e-09	0.0288219	0.016328	0.00746958	0.854405
CCNB2	5.3961e-68	0	1.37397e-38	0	0.625863	0.10521	0.322329	8.56854e-09	0.0288456	0.0074809	0.00342279	0.854405
SNRPB	2.28451e-68	0	1.06727e-38	0	0.618194	0.107508	0.319876	9.02603e-09	0.0288576	-0.0126368	0.00578224	0.854405
SRRM4	2.30789e-68	0	1.21683e-38	0	0.615135	0.10613	0.324677	7.91898e-09	0.0288995	-0.00519441	0.00237744	0.854405
CHUK	3.87545e-68	0	1.15561e-38	0	0.613827	0.104851	0.315343	8.77193e-09	0.0289671	0.00958809	0.00439024	0.854405
RNASEH1	3.79188e-68	0	1.37556e-38	0	0.613249	0.10782	0.324099	8.19286e-09	0.0290253	0.0131153	0.00600746	0.854405
PNN	5.91183e-68	0	1.30142e-38	0	0.622481	0.10474	0.318404	9.84045e-09	0.0290399	0.00699957	0.00320645	0.854405
KRAS	2.85253e-68	0	1.22962e-38	0	0.617743	0.104666	0.323129	8.69237e-09	0.0290998	-0.00849043	0.00389085	0.854405
ZSWIM6	1.98546e-68	0	1.18033e-38	0	0.627366	0.103701	0.326538	8.56212e-09	0.0291028	-0.00303959	0.00139296	0.854405
METTL22	2.12348e-68	0	1.27875e-38	0	0.615174	0.103947	0.321461	8.40387e-09	0.0291611	-0.00441259	0.0020229	0.854405
ZNF276	3.24341e-68	0	1.18131e-38	0	0.610232	0.107546	0.321278	8.45984e-09	0.0291873	0.00666714	0.00305696	0.854405
CYSLTR2	2.13314e-68	0	1.23157e-38	0	0.606519	0.104814	0.32212	9.57635e-09	0.0291923	0.00608777	0.0027914	0.854405
AURKC	3.47199e-68	0	1.17121e-38	0	0.61216	0.107018	0.324315	8.74012e-09	0.0292712	0.0052948	0.00242899	0.855363
CARD8	3.83681e-68	0	1.27008e-38	0	0.615374	0.103699	0.324486	9.6115e-09	0.0293558	0.0108207	0.0049666	0.855737
ZNF326	3.02653e-68	0	1.12182e-38	0	0.627657	0.107474	0.32412	9.55737e-09	0.0293762	-0.0105527	0.0048442	0.855737
SLC16A3	3.66934e-68	0	1.22334e-38	0	0.613546	0.103121	0.320399	8.99457e-09	0.029427	0.00562401	0.0025825	0.855873
GATAD1	3.88956e-68	0	1.23794e-38	0	0.620846	0.10707	0.321597	9.01907e-09	0.0295239	0.0176982	0.00813171	0.856737
SMARCA1	2.68844e-68	0	1.21171e-38	0	0.619128	0.105113	0.322221	9.24877e-09	0.029549	-0.0131414	0.00603894	0.856737
UGT2A2	3.18941e-68	0	1.18984e-38	0	0.617063	0.105114	0.320652	8.81469e-09	0.0296222	0.0844913	0.0388443	0.857519
PLA2G4F	4.95416e-68	0	1.10534e-38	0	0.6138	0.105343	0.32598	7.58835e-09	0.0296837	0.00322368	0.00148263	0.85796
F10	4.30008e-68	0	1.32989e-38	0	0.617384	0.106331	0.318095	7.9914e-09	0.0297974	0.00813707	0.00374498	0.859907
VEGFC	1.99376e-68	0	1.21435e-38	0	0.619402	0.105816	0.324577	9.15217e-09	0.0298607	-0.00304276	0.00140093	0.860396
SYNJ2BP	3.17318e-68	0	1.2139e-38	0	0.611937	0.106573	0.315305	8.57539e-09	0.0299835	0.026859	0.0123755	0.862129
PLAG1	4.0675e-68	0	1.17875e-38	0	0.613508	0.104699	0.322206	8.77652e-09	0.0300138	0.00846792	0.00390239	0.862129
HSD17B7	4.63382e-68	0	1.41769e-38	0	0.614139	0.106608	0.317613	9.49803e-09	0.0301678	0.0100059	0.00461548	0.865215
HOXB1	2.54895e-68	0	1.37024e-38	0	0.616031	0.103966	0.319915	9.20204e-09	0.0303773	-0.00523304	0.00241693	0.865879
ANKS3	5.02559e-68	0	1.25769e-38	0	0.618869	0.10743	0.323458	8.28026e-09	0.0305434	0.0058985	0.00272701	0.865879
LEKR1	4.89538e-68	0	1.26595e-38	0	0.624857	0.104666	0.321256	9.14849e-09	0.0305568	0.00697681	0.0032258	0.865879
CEACAM20	5.20854e-68	0	1.31372e-38	0	0.620169	0.106976	0.320738	8.24303e-09	0.0305888	0.0491358	0.0227228	0.865879
SLC9A3	5.46155e-68	0	1.32255e-38	0	0.615475	0.108157	0.327486	8.27098e-09	0.030591	0.00551592	0.00255086	0.865879
MORC2	2.68786e-68	0	1.27293e-38	0	0.617264	0.106311	0.324936	9.30444e-09	0.030605	-0.00741558	0.00342966	0.865879
GGT5	4.20683e-68	0	1.22774e-38	0	0.618238	0.105624	0.31766	8.80526e-09	0.0306801	0.00759349	0.00351352	0.865879
PHB	4.37689e-68	0	1.22785e-38	0	0.613742	0.103691	0.320043	1.0097e-08	0.0307085	0.00624061	0.00288804	0.865879
TOR4A	3.29702e-68	0	1.25223e-38	0	0.618821	0.10746	0.317527	9.11857e-09	0.0307602	-0.0149148	0.00690442	0.865879
BCCIP	5.23465e-68	0	1.46453e-38	0	0.623108	0.105091	0.320268	8.36277e-09	0.0307615	0.0120022	0.00555613	0.865879
ZNF324B	4.14388e-68	0	1.44857e-38	0	0.613424	0.106238	0.324324	8.52272e-09	0.0308027	0.00873083	0.00404274	0.865879
MRPL4	5.00469e-68	0	1.30868e-38	0	0.612662	0.107998	0.323055	8.34312e-09	0.0308681	0.00556414	0.00257743	0.865879
AP2S1	3.19935e-68	0	1.22233e-38	0	0.618525	0.104467	0.321557	8.72315e-09	0.0309562	-0.0570707	0.0264503	0.865879
ZNF512B	4.98599e-68	0	1.35838e-38	0	0.608349	0.105955	0.317408	8.48669e-09	0.0309752	0.00480846	0.00222881	0.865879
CRYBG1	7.62052e-68	0	1.23767e-38	0	0.624792	0.105888	0.321244	8.61684e-09	0.0309783	0.00299843	0.00138985	0.865879
MROH9	1.88738e-68	0	1.36045e-38	0	0.614053	0.107168	0.320635	9.43865e-09	0.0309906	-0.00350791	0.00162613	0.865879
ERCC1	3.24103e-68	0	1.25696e-38	0	0.610328	0.105462	0.324374	8.94124e-09	0.0309939	0.00923799	0.00428246	0.865879
WDCP	4.73989e-68	0	1.2963e-38	0	0.617781	0.104296	0.318919	9.32054e-09	0.0310309	0.00731693	0.00339266	0.865879
HACL1	4.74736e-68	0	1.18968e-38	0	0.615809	0.105507	0.322346	8.0737e-09	0.0312713	0.00483648	0.00224574	0.86803
CFTR	8.46854e-68	0	1.22347e-38	0	0.616759	0.108045	0.320618	9.21123e-09	0.0312971	0.00176705	0.000820628	0.86803
NT5E	4.30249e-68	0	1.19266e-38	0	0.620421	0.104746	0.314082	8.84882e-09	0.0313004	0.00504815	0.00234443	0.86803
BCAP31	2.27157e-68	0	1.37529e-38	0	0.614113	0.103924	0.316819	9.56824e-09	0.0313188	-0.00798516	0.00370882	0.86803
CLTB	5.08333e-68	0	1.24249e-38	0	0.619679	0.105407	0.322518	8.58415e-09	0.0313419	0.0107864	0.0050106	0.86803
CCT2	2.44883e-68	0	1.20729e-38	0	0.613634	0.105348	0.322012	9.05747e-09	0.0315034	-0.00858325	0.00399095	0.868239
FAM159A	2.45785e-68	0	1.29744e-38	0	0.614469	0.103506	0.320821	9.10092e-09	0.0315134	-0.00729342	0.00339142	0.868239
ZNF415	2.5839e-68	0	1.24351e-38	0	0.617564	0.105066	0.32636	8.87595e-09	0.0315696	-0.00780893	0.00363233	0.868239
FLI1	2.35118e-68	0	1.23449e-38	0	0.611934	0.107466	0.322292	9.33063e-09	0.0316526	-0.00907625	0.00422389	0.868239
PEX2	3.67513e-68	0	1.33534e-38	0	0.612124	0.105281	0.321289	8.83266e-09	0.0316896	0.013343	0.00621087	0.868239
VAMP5	3.16096e-68	0	1.2341e-38	0	0.611388	0.104192	0.325926	8.74876e-09	0.0316916	0.0185616	0.00864013	0.868239
GLI3	2.08533e-68	0	1.38836e-38	0	0.621449	0.106646	0.32007	9.81613e-09	0.0318064	-0.00267971	0.0012482	0.868239
PTPRE	2.09924e-68	0	1.16466e-38	0	0.613227	0.1057	0.324305	8.50324e-09	0.0318072	-0.00564212	0.0026281	0.868239
SCYL2	4.14685e-68	0	1.33191e-38	0	0.614706	0.105508	0.32496	8.50345e-09	0.0318386	0.00874624	0.00407474	0.868239
PCDHGB6	1.97337e-68	0	1.29886e-38	0	0.619843	0.10589	0.32204	9.25431e-09	0.0318701	-0.00359329	0.00167437	0.868239
SYT17	3.91481e-68	0	1.28017e-38	0	0.611972	0.10606	0.32042	9.37388e-09	0.031902	0.00675753	0.0031494	0.868239
MISP	4.43374e-68	0	1.19499e-38	0	0.61103	0.105061	0.319555	8.57309e-09	0.0319296	0.00358751	0.00167225	0.868239
MAS1L	2.37857e-68	0	1.19688e-38	0	0.61469	0.106869	0.318325	1.01986e-08	0.0319577	-0.00862086	0.00401912	0.868239
PTPMT1	4.00589e-68	0	1.0906e-38	0	0.622599	0.10692	0.319873	8.47463e-09	0.0320274	0.013507	0.00629963	0.86886
ADAMTSL4	5.85219e-68	0	1.30715e-38	0	0.611296	0.107775	0.321234	7.93119e-09	0.0321563	0.0032182	0.00150209	0.86913
GNG5	3.0707e-68	0	1.19477e-38	0	0.616295	0.105469	0.319499	8.98295e-09	0.0321641	0.0348373	0.016261	0.86913
CYP26A1	5.63599e-68	0	1.41827e-38	0	0.619238	0.10524	0.316747	8.49662e-09	0.0322941	0.00693636	0.00324012	0.86913
SUDS3	3.30927e-68	0	1.53611e-38	0	0.615475	0.106694	0.319013	9.31985e-09	0.0323307	-0.0168525	0.00787382	0.86913
IFT81	5.14927e-68	0	1.35344e-38	0	0.616956	0.106037	0.322272	9.53697e-09	0.0323788	0.00489516	0.00228775	0.86913
RBPMS2	2.8282e-68	0	1.26925e-38	0	0.623484	0.105265	0.321142	9.35294e-09	0.0323861	-0.0126089	0.00589301	0.86913
KIF22	4.40621e-68	0	1.20947e-38	0	0.621763	0.104976	0.319222	8.53128e-09	0.0324049	0.00660577	0.00308767	0.86913
ZNF263	4.08268e-68	0	1.26273e-38	0	0.615138	0.105697	0.325595	8.51352e-09	0.032412	0.00778588	0.00363943	0.86913
MICAL3	7.03053e-68	0	1.20338e-38	0	0.620171	0.105465	0.323781	9.0584e-09	0.0324754	0.00270554	0.00126514	0.869571
PCSK9	2.58276e-68	0	1.18793e-38	0	0.616349	0.106434	0.321654	9.02241e-09	0.0327408	-0.00532489	0.00249378	0.873753
SDC3	4.42712e-68	0	1.34194e-38	0	0.618302	0.105491	0.314803	8.44487e-09	0.032761	0.0100876	0.00472482	0.873753
CCL24	2.82604e-68	0	1.20102e-38	0	0.610792	0.106451	0.317539	9.01711e-09	0.0327787	-0.0190638	0.00893	0.873753
TRIP12	2.25152e-68	0	1.12516e-38	0	0.617927	0.103021	0.324757	9.84432e-09	0.0328501	-0.00520666	0.00243994	0.873753
USPL1	2.42024e-68	0	1.44643e-38	0	0.608155	0.107293	0.321899	1.02911e-08	0.032867	-0.00518242	0.00242881	0.873753
BUD13	2.50282e-68	0	1.12957e-38	0	0.627519	0.105812	0.325984	8.19836e-09	0.0329175	-0.00465346	0.00218154	0.873844
INTS14	4.47816e-68	0	1.34341e-38	0	0.623373	0.102298	0.321146	1.07135e-08	0.0329794	0.0070895	0.00332473	0.874237
LIG3	4.323e-68	0	1.17573e-38	0	0.618003	0.10567	0.322034	8.83749e-09	0.0331094	0.00555358	0.00260637	0.876431
NCSTN	2.08071e-68	0	1.17799e-38	0	0.61226	0.105814	0.318218	9.2939e-09	0.0332609	-0.00673554	0.0031638	0.876927
SIAE	2.28921e-68	0	1.17566e-38	0	0.614857	0.108212	0.322382	8.27888e-09	0.0333266	-0.00469449	0.0022059	0.876927
TMPRSS7	7.55518e-68	0	1.39664e-38	0	0.617992	0.10536	0.319853	1.0118e-08	0.0333893	0.00269723	0.00126786	0.876927
PXN	1.74476e-68	0	1.21327e-38	0	0.612574	0.104946	0.32285	9.52065e-09	0.0335461	-0.00402437	0.00189337	0.876927
MC5R	2.49144e-68	0	1.36044e-38	0	0.615636	0.104637	0.322956	9.34899e-09	0.0335809	-0.00890029	0.0041882	0.876927
NMUR1	2.4891e-68	0	1.35644e-38	0	0.614746	0.104324	0.323129	9.53002e-09	0.033602	-0.00448107	0.0021089	0.876927
PPARA	5.9734e-68	0	1.42294e-38	0	0.618919	0.108332	0.320703	9.84707e-09	0.0336089	0.00754591	0.00355143	0.876927
ZNF775	4.70338e-68	0	1.40589e-38	0	0.619844	0.105682	0.322499	8.84614e-09	0.0337305	0.00860111	0.00405082	0.876927
CCNB3	3.25112e-68	0	1.15623e-38	0	0.618269	0.106376	0.325277	8.16663e-09	0.0337464	0.0148125	0.00697678	0.876927
EVC2	1.95926e-68	0	1.24948e-38	0	0.622196	0.106013	0.324457	8.11625e-09	0.0338451	-0.00281712	0.00132762	0.876927
DAGLB	6.2991e-68	0	1.32589e-38	0	0.61229	0.106699	0.322767	8.73633e-09	0.0338943	0.00280237	0.00132103	0.876927
PPP1R3B	3.33273e-68	0	1.25275e-38	0	0.618386	0.104407	0.32188	9.07319e-09	0.0339584	0.0155015	0.00730999	0.876927
FAM187B	4.00747e-68	0	1.21077e-38	0	0.615013	0.106413	0.321949	8.86758e-09	0.0339727	0.00930794	0.00438967	0.876927
CORO2B	4.27343e-68	0	1.25155e-38	0	0.615138	0.104844	0.322008	7.99698e-09	0.0341521	0.00639485	0.00301887	0.876927
DDX59	2.01375e-68	0	1.2349e-38	0	0.613807	0.107114	0.317697	8.90414e-09	0.0341528	-0.00360348	0.00170113	0.876927
KCTD13	2.50559e-68	0	1.20304e-38	0	0.611889	0.104839	0.322692	8.73318e-09	0.0341897	-0.0105494	0.00498117	0.876927
LMAN2	2.03222e-68	0	1.20796e-38	0	0.614773	0.106985	0.326855	8.64634e-09	0.0342096	-0.0053262	0.00251519	0.876927
PRAMEF20	3.59629e-68	0	1.34359e-38	0	0.615615	0.105906	0.322667	8.85252e-09	0.0342208	0.0115529	0.00545597	0.876927
TMUB1	3.77481e-68	0	1.26081e-38	0	0.619257	0.105825	0.322618	9.19312e-09	0.0342944	0.0123913	0.00585429	0.876927
CDK1	2.77425e-68	0	1.24399e-38	0	0.616502	0.104089	0.323312	9.48769e-09	0.034383	-0.0102176	0.00482969	0.876927
RAD18	4.36162e-68	0	1.29416e-38	0	0.619772	0.105832	0.318057	9.40211e-09	0.034435	0.00939165	0.00444058	0.876927
ZNF503	1.889e-68	0	1.20127e-38	0	0.611555	0.106634	0.318099	8.20024e-09	0.0344561	-0.00552226	0.00261135	0.876927
ZDHHC19	2.29602e-68	0	1.26804e-38	0	0.608198	0.107365	0.319464	9.81112e-09	0.0344562	-0.00621961	0.00294112	0.876927
MSRB1	2.33701e-68	0	1.19533e-38	0	0.613115	0.106071	0.322442	8.96605e-09	0.0345235	-0.010629	0.00502807	0.876927
NME5	4.01068e-68	0	1.39223e-38	0	0.613606	0.105431	0.321189	9.18367e-09	0.0345474	0.0076791	0.00363311	0.876927
OR5P2	3.70556e-68	0	1.2388e-38	0	0.613828	0.105635	0.322064	8.41649e-09	0.0346103	0.00812757	0.00384662	0.876927
NPY5R	2.98642e-68	0	1.27233e-38	0	0.618296	0.103777	0.32133	8.60992e-09	0.0346158	-0.00999155	0.00472896	0.876927
FGF21	2.18754e-68	0	1.14078e-38	0	0.613439	0.103865	0.315713	8.35033e-09	0.0346583	-0.00997876	0.00472401	0.876927
JAGN1	4.06866e-68	0	1.33099e-38	0	0.616493	0.105573	0.322924	8.55095e-09	0.0347135	0.0111519	0.00528098	0.876927
SLC14A2	5.82739e-68	0	1.3629e-38	0	0.617702	0.107108	0.321541	9.95758e-09	0.0347148	0.00399001	0.00188949	0.876927
ACTL8	5.91043e-68	0	1.40001e-38	0	0.620071	0.107425	0.322051	8.41888e-09	0.0347875	0.00611892	0.0028988	0.876927
OR4D11	3.21389e-68	0	1.33421e-38	0	0.623712	0.107273	0.324376	8.77098e-09	0.0348385	-0.0119651	0.00567	0.876927
ADAM32	3.98693e-68	0	1.25299e-38	0	0.615258	0.106751	0.317844	8.82392e-09	0.0348562	0.00644828	0.00305599	0.876927
SUFU	5.17993e-68	0	1.34692e-38	0	0.621164	0.10585	0.320936	9.31106e-09	0.0350476	0.00730725	0.00346672	0.876927
ATRNL1	2.85959e-68	0	1.3604e-38	0	0.623057	0.10444	0.321054	8.86832e-09	0.0350777	-0.00530918	0.00251921	0.876927
IL15RA	4.9495e-68	0	1.30651e-38	0	0.618289	0.105668	0.321721	8.35227e-09	0.0351061	0.00641922	0.0030464	0.876927
MAFF	3.04934e-68	0	1.36179e-38	0	0.617792	0.105979	0.321624	8.8373e-09	0.0351357	-0.015051	0.00714397	0.876927
MFHAS1	5.80942e-68	0	1.29238e-38	0	0.621658	0.104037	0.322158	9.56288e-09	0.0351642	0.00509472	0.00241859	0.876927
CMKLR1	5.96184e-68	0	1.36074e-38	0	0.610128	0.105604	0.319674	8.33069e-09	0.035237	0.00338938	0.00160966	0.876927
NDUFA9	2.42173e-68	0	1.27471e-38	0	0.614657	0.103052	0.322905	9.85973e-09	0.0352694	-0.00752003	0.003572	0.876927
GPR137	2.53418e-68	0	1.33103e-38	0	0.614881	0.104781	0.322847	9.12282e-09	0.0352737	-0.0104098	0.00494473	0.876927
MAP3K21	5.3728e-68	0	1.19938e-38	0	0.613172	0.106264	0.317663	8.54877e-09	0.0352902	0.00350187	0.00166357	0.876927
LIME1	3.83614e-68	0	1.35149e-38	0	0.61529	0.103212	0.321428	8.44781e-09	0.0353114	0.0195264	0.00927714	0.876927
DGKA	2.20994e-68	0	1.28981e-38	0	0.614666	0.104652	0.32245	9.58596e-09	0.0353943	-0.00562829	0.00267525	0.876927
PSMA6	4.80096e-68	0	1.31415e-38	0	0.616912	0.108864	0.320985	1.06623e-08	0.0353972	0.0126746	0.0060246	0.876927
MAPK14	4.63669e-68	0	1.35836e-38	0	0.62232	0.105841	0.326193	8.25119e-09	0.0354078	0.0131952	0.00627245	0.876927
ASPA	4.33968e-68	0	1.45012e-38	0	0.61572	0.10581	0.321116	8.33818e-09	0.0354191	0.00874591	0.00415768	0.876927
HMCES	3.27267e-68	0	1.40568e-38	0	0.61995	0.106209	0.319687	9.60962e-09	0.0354392	-0.00724756	0.00344576	0.876927
CYP3A5	3.47415e-68	0	1.29405e-38	0	0.615679	0.10401	0.323062	8.42681e-09	0.0354898	0.00506871	0.00241052	0.876927
PDE7B	2.38455e-68	0	1.12813e-38	0	0.611962	0.106263	0.323095	8.59007e-09	0.0354911	-0.00905201	0.00430488	0.876927
ZNF850	4.71625e-68	0	1.39563e-38	0	0.619367	0.105341	0.319179	7.88943e-09	0.0355834	0.00603526	0.00287164	0.87804
OARD1	3.2202e-68	0	1.29694e-38	0	0.606452	0.103992	0.323418	8.53252e-09	0.0357415	0.0037502	0.00178591	0.878774
HAX1	3.63945e-68	0	1.1422e-38	0	0.614888	0.106658	0.323462	9.3859e-09	0.0357549	0.00901158	0.00429179	0.878774
SERTAD4	5.9259e-68	0	1.21133e-38	0	0.621424	0.105752	0.320505	9.09799e-09	0.035849	0.00461872	0.0022008	0.878774
DSCR3	4.35503e-68	0	1.31605e-38	0	0.621214	0.105725	0.322535	9.71608e-09	0.0358855	0.00689253	0.00328491	0.878774
TPM3	3.51447e-68	0	1.27937e-38	0	0.61568	0.105631	0.322791	8.90393e-09	0.0359042	0.0202076	0.00963173	0.878774
KRT5	2.57909e-68	0	1.26711e-38	0	0.616174	0.105551	0.317882	9.13062e-09	0.0359508	-0.006506	0.00310178	0.878774
SCARB1	2.3805e-68	0	1.36715e-38	0	0.615723	0.10781	0.321048	8.46832e-09	0.0359576	-0.00526505	0.00251024	0.878774
NT5DC2	4.42621e-68	0	1.24409e-38	0	0.618294	0.103426	0.323336	8.29205e-09	0.035992	0.00555838	0.00265059	0.878774
FBXO31	2.98332e-68	0	1.34343e-38	0	0.621386	0.106106	0.324483	8.75176e-09	0.0360882	-0.00934616	0.00445915	0.879963
ADH1A	3.61424e-68	0	1.18643e-38	0	0.617911	0.104078	0.32648	8.09607e-09	0.0362247	0.00942188	0.00449857	0.880797
ENDOG	4.12049e-68	0	1.18734e-38	0	0.616637	0.10569	0.317241	9.51226e-09	0.0362627	0.00480067	0.0022926	0.880797
IFNA10	4.88036e-68	0	1.32305e-38	0	0.627032	0.103945	0.32361	8.12707e-09	0.0362841	0.00797148	0.00380728	0.880797
MYH7	5.44684e-68	0	1.17047e-38	0	0.618164	0.10399	0.315275	8.92002e-09	0.0363591	0.00350798	0.00167613	0.880797
CD84	3.04485e-68	0	1.31787e-38	0	0.615613	0.106807	0.315985	9.53714e-09	0.0363597	-0.0110027	0.00525715	0.880797
KIAA1456	3.55484e-68	0	1.26259e-38	0	0.614186	0.105749	0.316046	9.02499e-09	0.0364512	0.00746726	0.00356965	0.881863
LIMS1	4.83596e-68	0	1.51127e-38	0	0.611157	0.104357	0.320938	8.65942e-09	0.0365624	0.00373947	0.00178868	0.881913
MOG	2.3415e-68	0	1.24544e-38	0	0.619135	0.105842	0.325878	8.95265e-09	0.0365817	-0.00603905	0.00288892	0.881913
APOBEC3B	2.57311e-68	0	1.29761e-38	0	0.611669	0.104935	0.317609	9.11463e-09	0.0366627	-0.0106104	0.00507791	0.881913
CTR9	4.20367e-68	0	1.30404e-38	0	0.613227	0.106616	0.321594	7.66835e-09	0.0366637	0.00663757	0.00317662	0.881913
TRIM28	2.33748e-68	0	1.39425e-38	0	0.613809	0.105271	0.318022	9.0833e-09	0.0366909	-0.00553615	0.00264988	0.881913
SLC2A7	6.15671e-68	0	1.32118e-38	0	0.616493	0.104728	0.322493	8.82708e-09	0.0368512	0.00297519	0.00142529	0.883911
PHRF1	2.27898e-68	0	1.23883e-38	0	0.617884	0.105855	0.322784	9.80524e-09	0.0368693	-0.00342195	0.00163947	0.883911
STAU1	3.36438e-68	0	1.29269e-38	0	0.614462	0.105588	0.32518	8.18562e-09	0.0371657	0.00916398	0.00439739	0.889866
TLE4	5.22243e-68	0	1.17488e-38	0	0.619274	0.10471	0.321476	7.857e-09	0.0372282	0.00661956	0.00317748	0.890214
ZBTB21	3.35308e-68	0	1.27629e-38	0	0.611285	0.105553	0.318671	8.35491e-09	0.0373074	0.00718631	0.00345097	0.890336
PRAMEF6	4.01626e-68	0	1.22213e-38	0	0.620862	0.105913	0.320967	8.65011e-09	0.0373293	-0.00621838	0.0029865	0.890336
C6orf15	2.37929e-68	0	1.32909e-38	0	0.611544	0.104907	0.318079	9.12921e-09	0.0375053	-0.00887248	0.00426512	0.893066
TAGLN	3.4132e-68	0	1.17135e-38	0	0.614408	0.107438	0.319704	9.52448e-09	0.0376246	0.0107664	0.00517879	0.893066
SETD4	2.26279e-68	0	1.19991e-38	0	0.623509	0.104171	0.317453	9.41182e-09	0.0376434	-0.00549089	0.00264146	0.893066
TSGA10IP	4.75207e-68	0	1.33201e-38	0	0.624028	0.104835	0.321611	9.42428e-09	0.0376938	0.0258498	0.0124386	0.893066
C14orf37	2.34246e-68	0	1.25976e-38	0	0.613894	0.106083	0.322557	8.26184e-09	0.037717	-0.00591538	0.00284676	0.893066
RMDN3	3.02597e-68	0	1.41546e-38	0	0.615109	0.105321	0.320976	8.91582e-09	0.0378205	-0.00852648	0.00410556	0.893066
FAM122A	2.88718e-68	0	1.18287e-38	0	0.61549	0.105795	0.323036	8.57638e-09	0.0378281	-0.0158514	0.00763284	0.893066
CCDC63	3.40188e-68	0	1.23544e-38	0	0.617976	0.106118	0.323065	8.46012e-09	0.0378287	0.00540955	0.00260485	0.893066
SLC12A1	5.50962e-68	0	1.19329e-38	0	0.614049	0.106415	0.317509	9.75317e-09	0.0379276	0.00291229	0.00140307	0.894262
SLC1A7	5.39741e-68	0	1.38542e-38	0	0.613835	0.10515	0.324135	8.65876e-09	0.0379775	0.00373275	0.00179881	0.894302
ZSCAN1	2.90704e-68	0	1.46242e-38	0	0.612852	0.106785	0.317618	7.90245e-09	0.0382682	-0.00550582	0.00265726	0.900006
GSTO1	4.26815e-68	0	1.2468e-38	0	0.621074	0.105939	0.324188	8.68596e-09	0.0384747	0.00773579	0.00373749	0.902727
PIGQ	5.32384e-68	0	1.39259e-38	0	0.617392	0.105626	0.322084	9.67505e-09	0.0384903	0.00373774	0.00180601	0.902727
TXNL4B	2.98231e-68	0	1.38894e-38	0	0.61768	0.105652	0.320641	9.44571e-09	0.0385803	-0.0104859	0.00506894	0.902727
XPO6	2.29589e-68	0	1.206e-38	0	0.613908	0.106073	0.317374	9.74847e-09	0.0386095	-0.00578397	0.00279643	0.902727
LCE1B	2.89992e-68	0	1.19113e-38	0	0.617579	0.104384	0.325017	8.68172e-09	0.0386642	-0.0396754	0.0191876	0.902727
SIGLEC15	5.30128e-68	0	1.2407e-38	0	0.622318	0.104473	0.327093	8.01231e-09	0.0386758	0.00645914	0.00312392	0.902727
GABRA5	3.36771e-68	0	1.35668e-38	0	0.61278	0.106152	0.320424	9.00639e-09	0.0387835	0.0143971	0.0069669	0.904104
CYTIP	4.84667e-68	0	1.4845e-38	0	0.615947	0.107484	0.324777	7.7612e-09	0.038912	0.00715395	0.00346416	0.905554
SLC25A47	7.58679e-68	0	1.23385e-38	0	0.627196	0.103044	0.32032	1.07446e-08	0.0390364	0.00273081	0.00132318	0.905554
SYMPK	4.94348e-68	0	1.26932e-38	0	0.615397	0.104963	0.321645	8.63762e-09	0.0390718	0.00339473	0.00164518	0.905554
PMEPA1	4.56379e-68	0	1.24469e-38	0	0.621271	0.104854	0.318848	8.72933e-09	0.0391414	0.0117672	0.0057047	0.905554
ZNF330	2.41346e-68	0	1.0564e-38	0	0.618447	0.10587	0.318337	9.49201e-09	0.0392695	-0.00824883	0.00400162	0.905554
ATP12A	2.0308e-68	0	1.2471e-38	0	0.612884	0.105704	0.319042	9.39067e-09	0.0393216	-0.0037013	0.00179603	0.905554
KRBA1	6.59554e-68	0	1.26257e-38	0	0.617545	0.10667	0.323723	9.72777e-09	0.0393712	0.00338206	0.00164153	0.905554
C8orf4	3.58094e-68	0	1.2314e-38	0	0.617089	0.104211	0.316236	9.67219e-09	0.0394606	0.0168023	0.00815893	0.905554
HTRA2	5.24265e-68	0	1.26424e-38	0	0.618802	0.105935	0.3247	8.40471e-09	0.0394676	0.00733808	0.00356339	0.905554
CCDC22	1.65079e-68	0	1.28511e-38	0	0.614344	0.106549	0.323163	8.62863e-09	0.0395627	-0.00298572	0.00145057	0.905554
CPLX4	2.69738e-68	0	1.34056e-38	0	0.610266	0.105941	0.320752	8.98414e-09	0.0395838	-0.0107407	0.00521876	0.905554
OTOP3	2.20912e-68	0	1.22546e-38	0	0.617689	0.103736	0.32354	9.04329e-09	0.039594	-0.00293715	0.0014272	0.905554
NXT1	3.66375e-68	0	1.27556e-38	0	0.617247	0.105444	0.318614	9.04756e-09	0.0397278	0.0224761	0.0109289	0.905554
COLEC10	2.60856e-68	0	1.28048e-38	0	0.611258	0.10572	0.318987	9.70709e-09	0.0397447	-0.00628734	0.00305743	0.905554
AP3B1	5.6559e-68	0	1.39019e-38	0	0.617106	0.1072	0.314711	1.32266e-08	0.0398001	0.00371201	0.00180559	0.905554
MMP10	4.5863e-68	0	1.18727e-38	0	0.619788	0.106252	0.315605	1.0158e-08	0.0398685	0.00255428	0.00124288	0.905554
SERINC2	7.01016e-68	0	1.31739e-38	0	0.620463	0.106245	0.321674	7.78284e-09	0.0398829	0.00318409	0.00154945	0.905554
MRPL39	2.35703e-68	0	1.27845e-38	0	0.616794	0.106754	0.325846	9.62774e-09	0.0398905	-0.0065341	0.00317976	0.905554
PRAMEF11	3.98493e-68	0	1.25433e-38	0	0.62074	0.107675	0.318864	8.98497e-09	0.0399175	0.00786224	0.00382661	0.905554
PAAF1	3.94579e-68	0	1.05348e-38	0	0.619306	0.106267	0.319605	8.57858e-09	0.0399535	0.00714305	0.00347721	0.905554
ENHO	3.93245e-68	0	1.34773e-38	0	0.616793	0.10944	0.323638	8.63479e-09	0.0400135	0.0422362	0.0205666	0.905554
NDFIP1	2.97103e-68	0	1.44685e-38	0	0.610915	0.105272	0.323487	9.14567e-09	0.0401144	-0.0195336	0.00951656	0.905554
TFPI2	4.07998e-68	0	1.07801e-38	0	0.624032	0.107778	0.324654	8.77624e-09	0.040123	0.0141933	0.00691512	0.905554
ZP3	4.08521e-68	0	1.29307e-38	0	0.620177	0.105633	0.325147	7.99798e-09	0.0402102	-0.00748866	0.00365015	0.905554
TBC1D10A	4.12408e-68	0	1.43351e-38	0	0.610009	0.105424	0.319221	8.84622e-09	0.0402365	0.00705431	0.00343889	0.905554
MON1A	2.46948e-68	0	1.29568e-38	0	0.613881	0.105106	0.317445	1.0122e-08	0.0402512	-0.00634105	0.00309141	0.905554
SAMD3	5.73386e-68	0	1.32167e-38	0	0.6249	0.104235	0.324145	7.54935e-09	0.0402716	0.00448697	0.00218773	0.905554
RABAC1	2.83226e-68	0	1.26048e-38	0	0.611598	0.105195	0.320283	9.52157e-09	0.0403163	-0.0124687	0.00608076	0.905554
CNTD2	5.3466e-68	0	1.32706e-38	0	0.626742	0.103941	0.319495	9.26378e-09	0.0403727	0.0079505	0.00387842	0.905554
OR51I2	4.5168e-68	0	1.13826e-38	0	0.617925	0.106508	0.323146	8.49705e-09	0.040411	0.00773618	0.00377459	0.905554
ATP5D	3.20821e-68	0	1.39095e-38	0	0.618304	0.104574	0.324545	9.62766e-09	0.0404115	-0.0116035	0.00566154	0.905554
STON2	4.79872e-68	0	1.37234e-38	0	0.618729	0.10487	0.319877	9.12936e-09	0.0404462	0.00572758	0.00279506	0.905554
ZNF667	4.396e-68	0	1.28094e-38	0	0.61874	0.104845	0.328313	8.52311e-09	0.0404608	0.00618426	0.00301814	0.905554
TMPRSS11F	2.60212e-68	0	1.52708e-38	0	0.623391	0.105984	0.322752	9.24256e-09	0.0405386	-0.00511277	0.00249618	0.905554
PCDHB5	2.36333e-68	0	1.25211e-38	0	0.621185	0.105137	0.320421	8.68286e-09	0.0406016	-0.00525397	0.00256592	0.905554
EPPK1	1.26873e-68	0	1.23818e-38	0	0.611674	0.104057	0.322749	8.41757e-09	0.0406026	-0.00171109	0.000835662	0.905554
TET3	4.92545e-68	0	1.26911e-38	0	0.617801	0.105645	0.318424	8.86977e-09	0.040708	0.00557569	0.00272449	0.906292
GDPD4	6.18515e-68	0	1.31001e-38	0	0.622294	0.107891	0.319752	8.65075e-09	0.0407333	0.00895106	0.00437437	0.906292
NUDCD2	3.70135e-68	0	1.28984e-38	0	0.618205	0.107724	0.317764	1.03973e-08	0.0408092	0.0148116	0.00724113	0.906326
AQP12A	2.76825e-68	0	1.55822e-38	0	0.614328	0.10532	0.324633	8.6838e-09	0.0408988	-0.00649619	0.00317728	0.906326
MSTN	2.22442e-68	0	1.21447e-38	0	0.616105	0.104781	0.31979	9.50942e-09	0.0409956	-0.00645643	0.00315935	0.906326
FAM57A	2.68479e-68	0	1.32596e-38	0	0.617345	0.103783	0.320376	8.85932e-09	0.0410347	-0.00847294	0.0041469	0.906326
HEXA	5.0518e-68	0	1.37306e-38	0	0.620661	0.103451	0.324038	8.34509e-09	0.0411254	0.00366258	0.00179338	0.906326
SLC16A4	2.3445e-68	0	1.23456e-38	0	0.611171	0.10555	0.325776	8.09014e-09	0.0411575	-0.00839594	0.00411171	0.906326
SEMA4G	2.16692e-68	0	1.27593e-38	0	0.615761	0.105877	0.319359	9.05814e-09	0.0411633	-0.0035531	0.0017401	0.906326
CREB3L2	2.58997e-68	0	1.193e-38	0	0.617907	0.106396	0.321635	9.20149e-09	0.0412245	-0.00824859	0.00404089	0.906326
SLC1A5	1.85007e-68	0	1.23484e-38	0	0.606958	0.105755	0.321407	9.88706e-09	0.0412376	-0.00414628	0.00203134	0.906326
SIX5	2.42263e-68	0	1.22138e-38	0	0.621237	0.105694	0.318557	9.34685e-09	0.0412447	-0.00672474	0.0032947	0.906326
PHGR1	3.79894e-68	0	1.35565e-38	0	0.617115	0.107435	0.321936	8.79502e-09	0.0412721	0.0932224	0.0456793	0.906326
MID1IP1	2.4604e-68	0	1.17319e-38	0	0.614672	0.105421	0.322839	9.61721e-09	0.0414501	-0.00743365	0.0036457	0.907219
TFIP11	4.14546e-68	0	1.13701e-38	0	0.611916	0.106005	0.317972	8.8429e-09	0.0414876	0.00483288	0.00237064	0.907219
RHBDF2	1.96025e-68	0	1.30993e-38	0	0.611658	0.108483	0.328285	8.67847e-09	0.0415138	-0.00276231	0.00135515	0.907219
FAHD2A	2.61825e-68	0	1.17685e-38	0	0.61793	0.106206	0.322768	9.72242e-09	0.0415177	-0.00802172	0.00393542	0.907219
CDK12	4.42675e-68	0	1.24036e-38	0	0.616238	0.106196	0.324451	8.32877e-09	0.0416238	0.00605552	0.00297236	0.907219
AQP5	4.79053e-68	0	1.46185e-38	0	0.612937	0.106957	0.31852	9.87245e-09	0.0416744	0.00640084	0.00314263	0.907219
TMEM39B	4.1006e-68	0	1.35315e-38	0	0.62125	0.105294	0.318497	1.00775e-08	0.0417218	0.00943931	0.00463551	0.907219
ASCL1	2.70729e-68	0	1.24905e-38	0	0.614742	0.106014	0.323001	8.85806e-09	0.0417516	-0.0210127	0.0103206	0.907219
INA	4.17257e-68	0	1.33859e-38	0	0.618834	0.105645	0.323064	9.82858e-09	0.0417528	0.00896984	0.00440563	0.907219
NUP50	3.58831e-68	0	1.29472e-38	0	0.612273	0.104943	0.322336	8.55851e-09	0.0419692	0.00840597	0.00413305	0.90864
SPANXC	3.07956e-68	0	1.3576e-38	0	0.615305	0.103586	0.316197	8.62883e-09	0.0420016	0.0386145	0.018989	0.90864
SCAMP2	2.47991e-68	0	1.35296e-38	0	0.62051	0.104173	0.324158	9.12179e-09	0.0420648	-0.00558579	0.0027477	0.90864
OR1K1	4.54315e-68	0	1.19747e-38	0	0.615111	0.107486	0.317364	9.72286e-09	0.0421367	0.00646063	0.00317915	0.90864
DPYSL3	3.91754e-68	0	1.23268e-38	0	0.613125	0.105146	0.324713	8.25858e-09	0.0421529	0.00676655	0.00332996	0.90864
LRSAM1	4.41268e-68	0	1.14751e-38	0	0.613993	0.107042	0.323503	8.61054e-09	0.0422272	0.00427018	0.0021022	0.90864
A2M	5.5064e-68	0	1.32273e-38	0	0.618658	0.10403	0.320217	8.58801e-09	0.0422447	0.00400641	0.00197251	0.90864
TMC8	4.62224e-68	0	1.30236e-38	0	0.609868	0.104245	0.317845	8.41869e-09	0.0422529	0.00419054	0.00206325	0.90864
BMF	2.9178e-68	0	1.18858e-38	0	0.623987	0.103755	0.321416	9.43694e-09	0.0422778	-0.0120997	0.00595813	0.90864
LTC4S	3.36309e-68	0	1.38515e-38	0	0.617608	0.107749	0.321503	9.67731e-09	0.0423313	-0.0102508	0.005049	0.90864
PCGF3	2.94348e-68	0	1.27471e-38	0	0.618585	0.105382	0.322148	8.38037e-09	0.0423708	-0.0169168	0.00833388	0.90864
HSH2D	4.21641e-68	0	1.17096e-38	0	0.616945	0.106251	0.317816	9.31671e-09	0.042477	0.028559	0.0140765	0.90864
OR2B2	3.54219e-68	0	1.29428e-38	0	0.610864	0.106496	0.318603	1.05574e-08	0.0424882	0.010682	0.00526539	0.90864
GLIS1	6.52517e-68	0	1.27962e-38	0	0.620587	0.106696	0.320806	1.04303e-08	0.0425038	0.00373464	0.00184102	0.90864
TMEM208	4.53379e-68	0	1.18007e-38	0	0.627499	0.106886	0.316758	9.20849e-09	0.0426185	0.0127201	0.00627393	0.909102
DCLRE1C	4.58957e-68	0	1.35822e-38	0	0.618304	0.104863	0.321406	8.37251e-09	0.0426233	0.00583823	0.00287966	0.909102
CDH22	4.70078e-68	0	1.20382e-38	0	0.617148	0.105397	0.318286	9.04897e-09	0.0427981	0.00433556	0.00214028	0.911781
ANKRD2	5.95629e-68	0	1.34737e-38	0	0.616454	0.105973	0.324431	1.10717e-08	0.043093	0.00337352	0.00166772	0.915023
CARD16	2.85245e-68	0	1.2122e-38	0	0.616857	0.106104	0.320968	8.76585e-09	0.0431062	-0.013084	0.00646857	0.915023
CAVIN4	2.72123e-68	0	1.33131e-38	0	0.613203	0.105324	0.320363	9.7385e-09	0.0431208	-0.00845639	0.00418104	0.915023
FOXF1	4.38493e-68	0	1.45766e-38	0	0.615534	0.105702	0.323671	8.58567e-09	0.0433545	0.0132659	0.00656631	0.915023
SF3B2	2.02834e-68	0	1.3158e-38	0	0.614386	0.106442	0.321595	8.9849e-09	0.0433823	-0.00401048	0.00198536	0.915023
WDR31	3.59871e-68	0	1.06237e-38	0	0.618428	0.106051	0.319493	9.12355e-09	0.0433881	0.00400297	0.0019817	0.915023
XYLT2	5.96487e-68	0	1.33975e-38	0	0.626746	0.102296	0.324875	8.29829e-09	0.0433905	0.00494202	0.0024466	0.915023
PHF2	2.01018e-68	0	1.16169e-38	0	0.620835	0.105249	0.318271	9.87981e-09	0.043393	-0.00468849	0.00232112	0.915023
PEBP4	2.79914e-68	0	1.24039e-38	0	0.620318	0.10403	0.324514	8.23842e-09	0.0434676	-0.0111942	0.00554386	0.915023
TCEAL7	3.15573e-68	0	1.24396e-38	0	0.614213	0.105728	0.322106	8.60984e-09	0.0436384	0.0805427	0.0399208	0.915023
RPS11	3.73102e-68	0	1.53836e-38	0	0.613131	0.104523	0.320013	8.31845e-09	0.0436622	0.0264017	0.0130874	0.915023
LCN9	2.74121e-68	0	1.22014e-38	0	0.616069	0.108162	0.322806	8.55199e-09	0.0436801	0.0136585	0.00677113	0.915023
2010-03-01	2.36372e-68	0	1.44998e-38	0	0.614009	0.104939	0.323983	9.7627e-09	0.0437365	-0.0062919	0.00312001	0.915023
LHX1	4.0214e-68	0	1.24106e-38	0	0.617417	0.105173	0.320309	8.48255e-09	0.043789	0.00933289	0.00462913	0.915023
MTERF4	3.75889e-68	0	1.16458e-38	0	0.619045	0.102675	0.31713	1.00526e-08	0.0437946	0.00845455	0.00419358	0.915023
PARP11	3.61758e-68	0	1.19464e-38	0	0.614394	0.10552	0.323918	8.00327e-09	0.0438052	0.0069441	0.00344455	0.915023
UXS1	2.80492e-68	0	1.2347e-38	0	0.613681	0.107293	0.326287	9.68168e-09	0.0438345	-0.0105395	0.00522876	0.915023
LONRF2	2.65941e-68	0	1.32865e-38	0	0.617883	0.107997	0.322593	9.92315e-09	0.0438379	-0.00815437	0.00404552	0.915023
TNFAIP3	4.47798e-68	0	1.26683e-38	0	0.62311	0.105305	0.322718	8.55749e-09	0.0439161	0.00703877	0.00349334	0.915625
ZNF43	2.4291e-68	0	1.33037e-38	0	0.618086	0.10646	0.319431	1.00645e-08	0.0440962	-0.0036188	0.00179754	0.916798
DCAF4L1	4.63751e-68	0	1.43006e-38	0	0.61911	0.103766	0.323722	8.65271e-09	0.0441033	0.0127667	0.00634175	0.916798
RBP7	4.40195e-68	0	1.34335e-38	0	0.621353	0.104545	0.324876	8.20845e-09	0.0441205	0.00612353	0.00304205	0.916798
MPP6	2.63107e-68	0	1.36205e-38	0	0.61406	0.104771	0.322423	8.66321e-09	0.044347	-0.00850917	0.00423171	0.918317
C11orf24	4.29116e-68	0	1.27867e-38	0	0.61489	0.106952	0.322852	9.23894e-09	0.0444664	0.0122606	0.00610077	0.918317
LZTS1	2.25327e-68	0	1.23126e-38	0	0.621791	0.105028	0.31674	8.82058e-09	0.0444676	-0.00303897	0.00151217	0.918317
CFAP126	4.16021e-68	0	1.35023e-38	0	0.616121	0.105323	0.319293	8.22469e-09	0.0444835	0.00863028	0.00429469	0.918317
ERAS	3.21543e-68	0	1.24295e-38	0	0.626442	0.106817	0.323813	8.91276e-09	0.0445249	-0.0351127	0.0174765	0.918317
SPHK2	2.14542e-68	0	1.24033e-38	0	0.614324	0.106189	0.320697	9.32332e-09	0.0445264	-0.00511901	0.00254789	0.918317
KLRF2	2.36104e-68	0	1.27433e-38	0	0.617234	0.106977	0.321533	7.90227e-09	0.04454	-0.00532441	0.00265029	0.918317
MFSD9	4.95145e-68	0	1.21003e-38	0	0.616374	0.105729	0.32161	9.94867e-09	0.0448353	0.00269325	0.00134245	0.923378
TAP1	2.50102e-68	0	1.42147e-38	0	0.618058	0.106042	0.32126	1.02783e-08	0.0449868	-0.00385923	0.001925	0.925238
ZNF839	2.55599e-68	0	1.1786e-38	0	0.621292	0.104713	0.319679	9.36599e-09	0.0451135	-0.00616883	0.00307886	0.925238
PPRC1	5.45925e-68	0	1.22371e-38	0	0.61471	0.105482	0.32462	8.27542e-09	0.0451261	0.00288042	0.0014377	0.925238
TTC34	2.33928e-68	0	1.2243e-38	0	0.617631	0.10502	0.323713	7.78256e-09	0.0451448	-0.00569597	0.00284326	0.925238
ABTB2	2.14012e-68	0	1.20292e-38	0	0.618478	0.106145	0.325962	9.0986e-09	0.0452169	-0.00434778	0.00217102	0.925238
TNFRSF10B	2.88047e-68	0	1.21866e-38	0	0.61389	0.106095	0.319475	8.71165e-09	0.0452673	-0.0135587	0.006772	0.925238
DAND5	3.59694e-68	0	1.34338e-38	0	0.615308	0.106287	0.322247	1.02842e-08	0.0453158	0.0112697	0.00562997	0.925238
CCDC179	2.41917e-68	0	1.2429e-38	0	0.615359	0.107264	0.321954	8.23718e-09	0.0454848	-0.0151895	0.00759416	0.925238
TAX1BP3	2.37195e-68	0	1.31446e-38	0	0.615506	0.106074	0.321922	9.64208e-09	0.0455178	-0.00591167	0.00295605	0.925238
IDS	4.95842e-68	0	1.40088e-38	0	0.613583	0.107959	0.321636	8.56717e-09	0.0455203	0.0119754	0.0059882	0.925238
AP3S2	3.25291e-68	0	1.16075e-38	0	0.619687	0.104309	0.321035	8.84747e-09	0.0455223	0.0246371	0.0123197	0.925238
KCNG4	5.6275e-68	0	1.22793e-38	0	0.619018	0.106777	0.3162	8.52718e-09	0.0455239	0.0029257	0.001463	0.925238
GNB3	3.55312e-68	0	1.17009e-38	0	0.615493	0.106056	0.323772	9.28324e-09	0.045693	0.00785153	0.00392923	0.926365
TAS2R40	3.26921e-68	0	1.20698e-38	0	0.614054	0.103	0.320222	9.34504e-09	0.0457207	0.00536832	0.00268688	0.926365
ANKAR	4.93054e-68	0	1.12431e-38	0	0.61663	0.105994	0.316698	9.12204e-09	0.0458311	0.00379785	0.00190181	0.926365
CLEC4A	2.57284e-68	0	1.10489e-38	0	0.614403	0.105487	0.321922	9.47811e-09	0.0458331	-0.0160242	0.00802435	0.926365
CAPN8	4.51521e-68	0	1.27324e-38	0	0.613297	0.105817	0.318401	8.53426e-09	0.0458656	0.00517	0.00258934	0.926365
C14orf1	3.0491e-68	0	1.22526e-38	0	0.620097	0.105883	0.322256	9.05059e-09	0.0459185	-0.0182848	0.00915998	0.926365
ACKR4	4.56711e-68	0	1.39334e-38	0	0.619007	0.104935	0.324811	9.12738e-09	0.0459553	0.00944414	0.00473196	0.926365
PTPN9	2.66666e-68	0	1.39106e-38	0	0.613914	0.105871	0.322396	8.77726e-09	0.0460371	-0.00805828	0.00403909	0.926365
EDRF1	2.57861e-68	0	1.18177e-38	0	0.617824	0.105861	0.321847	9.19124e-09	0.046055	-0.0068579	0.0034377	0.926365
LAMB1	4.50712e-68	0	1.12095e-38	0	0.609268	0.107617	0.321892	7.83229e-09	0.0461282	0.00304395	0.00152638	0.926365
IL1RL1	2.70741e-68	0	1.32008e-38	0	0.618623	0.105387	0.321677	1.01623e-08	0.0462116	-0.00678821	0.00340522	0.926365
GSTP1	2.71129e-68	0	1.29694e-38	0	0.620344	0.106379	0.318311	7.96348e-09	0.0462242	-0.00759024	0.00380777	0.926365
DCBLD1	4.071e-68	0	1.32034e-38	0	0.614076	0.106457	0.322394	8.39565e-09	0.0462472	0.00733943	0.00368233	0.926365
PIWIL4	4.15478e-68	0	1.168e-38	0	0.615704	0.106136	0.323744	9.32533e-09	0.0462783	0.0052174	0.00261804	0.926365
TBC1D22A	2.37773e-68	0	1.20935e-38	0	0.619506	0.106246	0.321732	8.97017e-09	0.0464278	-0.00557854	0.00280117	0.92671
CD93	4.46988e-68	0	1.26895e-38	0	0.616655	0.105698	0.32293	8.12579e-09	0.046445	0.00654016	0.00328429	0.92671
RNF170	2.71115e-68	0	1.31639e-38	0	0.613761	0.106791	0.32127	9.04727e-09	0.0464454	-0.0114755	0.00576272	0.92671
IGSF1	1.92606e-68	0	1.26302e-38	0	0.617007	0.105266	0.32158	9.4277e-09	0.0465766	-0.00486143	0.00244275	0.927654
FIBP	2.43647e-68	0	1.18875e-38	0	0.616782	0.10402	0.321814	8.93951e-09	0.0465927	-0.00596991	0.00299995	0.927654
ZNF780A	2.95871e-68	0	1.39423e-38	0	0.619542	0.105099	0.32445	8.44803e-09	0.0467483	-0.00418939	0.00210671	0.929464
CASC1	4.01685e-68	0	1.17766e-38	0	0.616551	0.104599	0.324535	8.45171e-09	0.046819	0.00666021	0.00335029	0.929464
FNIP1	2.33907e-68	0	1.24115e-38	0	0.62058	0.105228	0.321112	9.31147e-09	0.0468601	-0.00379645	0.00191009	0.929464
SNRPE	2.98875e-68	0	1.2493e-38	0	0.613426	0.104538	0.319135	9.17482e-09	0.046884	0.0534032	0.0268714	0.929464
ARID4B	2.47277e-68	0	1.3649e-38	0	0.612015	0.106953	0.321988	9.5843e-09	0.0470251	-0.0053226	0.00267994	0.930042
PLEKHN1	5.45368e-68	0	1.37485e-38	0	0.617634	0.104592	0.320643	8.44572e-09	0.047027	0.00469075	0.00236182	0.930042
SMURF1	4.71257e-68	0	1.50116e-38	0	0.615304	0.108628	0.320057	9.32932e-09	0.0471153	0.00804884	0.00405426	0.930042
HPX	4.08841e-68	0	1.28562e-38	0	0.615049	0.106306	0.320359	9.09978e-09	0.0471208	0.00660234	0.00332573	0.930042
CCNL2	2.8091e-68	0	1.41489e-38	0	0.615729	0.105433	0.321873	7.91772e-09	0.0471745	-0.00654486	0.00329758	0.930042
FEZ2	4.45811e-68	0	1.47283e-38	0	0.619196	0.105	0.321042	9.6621e-09	0.0472138	0.00547276	0.0027579	0.930042
SGMS2	3.45647e-68	0	1.29307e-38	0	0.613273	0.104077	0.32095	8.60515e-09	0.0472981	0.00939698	0.00473724	0.930714
MUS81	5.60659e-68	0	1.39035e-38	0	0.624697	0.106272	0.321911	8.9703e-09	0.0475502	0.00598216	0.00301919	0.933642
UGT2B11	5.26348e-68	0	1.36578e-38	0	0.623349	0.106075	0.325284	8.87028e-09	0.0476411	0.00395944	0.00199914	0.933642
ME2	2.80606e-68	0	1.29905e-38	0	0.617061	0.107047	0.318049	8.46985e-09	0.0476448	-0.00592638	0.00299231	0.933642
CD2AP	4.33892e-68	0	1.17787e-38	0	0.616917	0.108213	0.322225	8.33766e-09	0.0476907	0.00724069	0.00365667	0.933642
GFI1	3.94241e-68	0	1.15117e-38	0	0.612568	0.106935	0.323601	8.77032e-09	0.0476984	0.00610909	0.0030853	0.933642
ZNF605	3.09258e-68	0	1.38481e-38	0	0.615746	0.106733	0.319188	8.93145e-09	0.047896	-0.00899884	0.00454876	0.933812
RHO	3.94091e-68	0	1.28461e-38	0	0.616441	0.107075	0.322045	1.01017e-08	0.0479263	0.00660688	0.00334012	0.933812
TCEAL2	3.72738e-68	0	1.46714e-38	0	0.620641	0.104648	0.319008	9.17948e-09	0.0479983	-0.0281351	0.0142283	0.933812
CLEC12B	3.51594e-68	0	1.24729e-38	0	0.612725	0.106562	0.327752	7.88526e-09	0.0480382	0.00813424	0.00411434	0.933812
SMIM29	3.40814e-68	0	1.30371e-38	0	0.614354	0.105717	0.322437	8.89717e-09	0.0481136	0.0068578	0.00346988	0.933812
GPRIN1	2.12304e-68	0	1.19199e-38	0	0.616074	0.104411	0.322694	8.27934e-09	0.0481719	-0.00474905	0.00240353	0.933812
NAA15	4.41136e-68	0	1.34769e-38	0	0.613459	0.107514	0.321968	8.94254e-09	0.0481747	0.00968434	0.00490138	0.933812
CACNA1H	1.12233e-67	0	1.39171e-38	0	0.618065	0.106816	0.323074	8.3945e-09	0.0481952	0.00172995	0.00087563	0.933812
BPTF	1.96491e-68	0	1.24049e-38	0	0.613416	0.105173	0.323629	9.5539e-09	0.0483364	-0.0042713	0.00216332	0.933812
MRE11	2.11862e-68	0	1.31118e-38	0	0.613831	0.106285	0.322186	8.1652e-09	0.0483668	-0.00391834	0.00198482	0.933812
TMEM248	3.3339e-68	0	1.1442e-38	0	0.620077	0.106931	0.324214	9.22218e-09	0.0483908	0.0123566	0.00625988	0.933812
ALPPL2	4.57204e-68	0	1.27361e-38	0	0.618174	0.107148	0.318222	9.84343e-09	0.0484443	0.0059453	0.00301262	0.933812
TIMD4	3.10117e-68	0	1.33465e-38	0	0.618803	0.104402	0.322455	9.75582e-09	0.0484637	-0.0116062	0.00588163	0.933812
ZNF440	2.24571e-68	0	1.17628e-38	0	0.613497	0.106023	0.319954	8.62119e-09	0.0484754	-0.00375235	0.00190166	0.933812
NAT6	4.47918e-68	0	1.23064e-38	0	0.611013	0.105692	0.325625	8.31253e-09	0.048507	0.00354078	0.0017947	0.933812
ZXDC	2.75722e-68	0	1.32036e-38	0	0.619264	0.106747	0.323602	8.62662e-09	0.0485354	-0.00637852	0.00323345	0.933812
LPCAT3	3.68726e-68	0	1.26979e-38	0	0.613823	0.106576	0.319818	9.14486e-09	0.0486119	0.00928855	0.00471023	0.933812
NDUFB9	3.83334e-68	0	1.29134e-38	0	0.616601	0.106437	0.32249	8.96605e-09	0.0486516	0.0098415	0.00499151	0.933812
OR4K2	2.18374e-68	0	1.19747e-38	0	0.611092	0.105425	0.322939	9.18032e-09	0.0487915	-0.0107604	0.00546093	0.933812
OR5H15	2.4997e-68	0	1.35451e-38	0	0.614788	0.105508	0.319638	9.52928e-09	0.0488508	-0.00574849	0.00291815	0.933812
HMGN1	3.49847e-68	0	1.2036e-38	0	0.618652	0.104806	0.322249	8.37906e-09	0.0488993	0.0141064	0.00716247	0.933812
NFIC	2.29103e-68	0	1.27807e-38	0	0.621224	0.103913	0.319918	8.67158e-09	0.0489047	-0.00441903	0.0022438	0.933812
ZNF184	2.84448e-68	0	1.37152e-38	0	0.614734	0.105455	0.321176	9.40078e-09	0.0489609	-0.00916714	0.00465586	0.933812
SGK2	5.77717e-68	0	1.40068e-38	0	0.624647	0.106999	0.325636	8.34117e-09	0.0489871	0.00470074	0.00238771	0.933812
FAM129A	2.45788e-68	0	1.3688e-38	0	0.624703	0.104413	0.324574	9.42338e-09	0.0490076	-0.00366634	0.00186247	0.933812
PAF1	3.76038e-68	0	1.33157e-38	0	0.608356	0.105884	0.318209	9.0985e-09	0.0490156	0.0119412	0.00606622	0.933812
GRIK1	6.6683e-68	0	1.42743e-38	0	0.624167	0.105507	0.324186	8.76828e-09	0.0491817	0.00355717	0.0018084	0.935742
FAM3D	2.16291e-68	0	1.22703e-38	0	0.613666	0.10379	0.319739	8.33962e-09	0.0492317	-0.00508019	0.00258324	0.935742
AMPD2	2.40635e-68	0	1.11861e-38	0	0.616103	0.104866	0.321008	9.62667e-09	0.0492682	-0.00611598	0.00311043	0.935742
ZNF684	5.51638e-68	0	1.35545e-38	0	0.621302	0.104848	0.323486	8.19316e-09	0.0494394	0.00461958	0.00235117	0.93606
CUX2	2.37054e-68	0	1.37809e-38	0	0.617084	0.10535	0.316764	9.60804e-09	0.0494572	-0.00413542	0.00210492	0.93606
GSTM2	3.6849e-68	0	1.16365e-38	0	0.618297	0.106143	0.316302	8.4745e-09	0.0495162	0.0102945	0.00524124	0.93606
MSX1	2.92283e-68	0	1.34318e-38	0	0.617784	0.105407	0.325788	8.91477e-09	0.0495321	-0.00892907	0.00454637	0.93606
IER3	3.13703e-68	0	1.45104e-38	0	0.617947	0.105465	0.319812	9.63841e-09	0.0495821	-0.00793041	0.00403878	0.93606
GMEB2	2.24873e-68	0	1.19959e-38	0	0.616658	0.102704	0.318347	8.84475e-09	0.0496589	-0.0070116	0.00357205	0.93606
LRIG1	2.20689e-68	0	1.37459e-38	0	0.617449	0.104178	0.319221	8.75172e-09	0.0497367	-0.00309624	0.00157791	0.93606
STN1	2.74151e-68	0	1.21115e-38	0	0.614029	0.10647	0.321621	8.87701e-09	0.0497394	-0.00928016	0.00472943	0.93606
KRTAP4-7	4.70888e-68	0	1.16714e-38	0	0.613366	0.106432	0.317971	9.6029e-09	0.0497679	0.00316736	0.00161438	0.93606
IFT74	2.72346e-68	0	1.31505e-38	0	0.620213	0.107715	0.323316	8.56807e-09	0.0497893	-0.00385191	0.00196347	0.93606
PLPPR4	5.24508e-68	0	1.1826e-38	0	0.622261	0.106656	0.324652	8.77202e-09	0.0500071	0.00469228	0.00239412	0.938344
B3GNT8	2.78873e-68	0	1.20731e-38	0	0.620376	0.106034	0.323326	9.65261e-09	0.050012	-0.00525949	0.00268358	0.938344
DRAM2	3.90533e-68	0	1.16735e-38	0	0.620993	0.104739	0.323326	8.87106e-09	0.0501093	0.00535987	0.00273596	0.938388
CNTROB	2.02603e-68	0	1.24999e-38	0	0.61512	0.103461	0.321292	1.00418e-08	0.0501509	-0.00294964	0.00150592	0.938388
NEXN	2.5401e-68	0	1.29872e-38	0	0.618142	0.106164	0.322393	8.81027e-09	0.0501759	-0.00446146	0.00227803	0.938388
PHOX2A	3.32285e-68	0	1.30674e-38	0	0.624844	0.104481	0.321143	9.36201e-09	0.0502475	-0.0140519	0.00717715	0.938388
NPAS4	2.66343e-68	0	1.24885e-38	0	0.618035	0.107543	0.314507	9.62513e-09	0.0502672	-0.00771068	0.00393864	0.938388
CCT6A	2.3611e-68	0	1.38813e-38	0	0.61175	0.104698	0.324817	7.63321e-09	0.0503876	-0.00716882	0.00366378	0.939061
NEUROG2	4.12105e-68	0	1.23381e-38	0	0.620051	0.105403	0.321353	8.4663e-09	0.0504067	0.0139213	0.00711538	0.939061
ATP6V1F	2.32476e-68	0	1.2067e-38	0	0.609634	0.105973	0.319246	9.19004e-09	0.0504664	-0.00622086	0.00318039	0.939061
TMEM185B	2.55512e-68	0	1.21277e-38	0	0.616449	0.104152	0.318399	9.2236e-09	0.0505516	-0.00878557	0.00449325	0.939061
PRM1	2.39652e-68	0	1.43812e-38	0	0.616412	0.103945	0.317037	1.02648e-08	0.0506787	-0.0187096	0.00957402	0.939061
2007-03-01	4.83512e-68	0	1.33725e-38	0	0.621409	0.104694	0.323388	9.45615e-09	0.0507921	0.00484508	0.00248052	0.939061
BCL2L13	5.25726e-68	0	1.23096e-38	0	0.617238	0.106534	0.316771	9.74767e-09	0.0507939	0.00410732	0.00210283	0.939061
TKT	2.13294e-68	0	1.24874e-38	0	0.616197	0.106856	0.320942	8.93956e-09	0.0509098	-0.00425386	0.00217895	0.939061
PITPNM1	6.77842e-68	0	1.322e-38	0	0.616855	0.10311	0.322827	8.0669e-09	0.050949	0.00272727	0.00139722	0.939061
OR51T1	3.06093e-68	0	1.16423e-38	0	0.613022	0.106209	0.320971	9.14212e-09	0.050962	0.00841011	0.00430887	0.939061
QTRT1	4.37e-68	0	1.26889e-38	0	0.61581	0.105359	0.32066	9.2257e-09	0.0510344	0.00429458	0.00220099	0.939061
A3GALT2	2.09393e-68	0	1.2681e-38	0	0.618267	0.104134	0.321142	9.44593e-09	0.0511028	-0.0022075	0.00113169	0.939061
FBXO41	2.44151e-68	0	1.28016e-38	0	0.62211	0.105655	0.322179	8.59808e-09	0.0513213	-0.00366804	0.0018822	0.939061
MKLN1	3.57783e-68	0	1.33864e-38	0	0.615204	0.102106	0.320944	8.86051e-09	0.0513394	0.0122689	0.00629611	0.939061
SSTR3	5.34239e-68	0	1.3195e-38	0	0.614473	0.107141	0.321676	9.18726e-09	0.0514221	0.00505643	0.00259576	0.939061
BFSP2	3.87448e-68	0	1.35292e-38	0	0.614493	0.104595	0.31956	8.36471e-09	0.0514289	0.00597916	0.00306954	0.939061
SEC14L3	2.43577e-68	0	1.25265e-38	0	0.616514	0.105279	0.326971	8.93709e-09	0.0515118	-0.00570767	0.00293121	0.939061
CHRM5	4.00747e-68	0	1.19795e-38	0	0.619974	0.106002	0.325444	9.09373e-09	0.0515205	0.00547807	0.0028134	0.939061
PID1	2.84913e-68	0	1.21331e-38	0	0.616938	0.106078	0.321737	9.23283e-09	0.0516769	-0.00873444	0.0044888	0.939061
C14orf39	2.10819e-68	0	1.33488e-38	0	0.615694	0.105027	0.322287	7.90196e-09	0.051699	-0.00391787	0.00201366	0.939061
CDHR2	1.77854e-68	0	1.21909e-38	0	0.616149	0.106744	0.324063	8.80961e-09	0.0518204	-0.00286728	0.00147445	0.939061
PARD3	5.1063e-68	0	1.15805e-38	0	0.61476	0.107742	0.322529	8.82671e-09	0.0518977	0.00327832	0.00168638	0.939061
IRF2BPL	5.16248e-68	0	1.12626e-38	0	0.621573	0.106479	0.321783	9.00877e-09	0.0519277	0.0063982	0.00329168	0.939061
POLE2	2.46205e-68	0	1.21818e-38	0	0.612183	0.107556	0.320466	9.30177e-09	0.0519415	-0.00557786	0.00286981	0.939061
SSR1	3.10368e-68	0	1.25401e-38	0	0.616036	0.10625	0.32311	8.82029e-09	0.0520364	-0.0126959	0.00653468	0.939061
PLIN3	4.98626e-68	0	1.19099e-38	0	0.61674	0.107488	0.319603	8.35036e-09	0.0520682	0.00456997	0.00235252	0.939061
CD109	5.68322e-68	0	1.29003e-38	0	0.614679	0.105304	0.319379	9.8096e-09	0.0521406	0.00323071	0.00166361	0.939061
TNFSF10	2.70137e-68	0	1.35627e-38	0	0.614717	0.105018	0.322076	9.69674e-09	0.0521601	-0.0129532	0.00667063	0.939061
LY6E	3.02155e-68	0	1.38263e-38	0	0.61062	0.106095	0.32252	8.88978e-09	0.0523118	-0.0188381	0.00970748	0.939061
TRIM3	2.93154e-68	0	1.15468e-38	0	0.622514	0.107227	0.322986	8.99554e-09	0.0523666	-0.00856133	0.00441278	0.939061
FAM43A	2.46543e-68	0	1.34168e-38	0	0.613976	0.103939	0.317479	9.68183e-09	0.0524091	-0.00814936	0.00420119	0.939061
PPP1R18	5.27411e-68	0	1.16067e-38	0	0.616497	0.104196	0.321798	7.79795e-09	0.0525137	0.00333705	0.00172109	0.939061
ADCY2	2.64411e-68	0	1.26278e-38	0	0.609529	0.105313	0.320778	8.66864e-09	0.0526031	-0.00660225	0.00340642	0.939061
RPP40	2.6145e-68	0	1.10746e-38	0	0.623757	0.103334	0.3209	9.17329e-09	0.0526247	-0.00680039	0.00350897	0.939061
SLC37A3	3.90643e-68	0	1.20924e-38	0	0.616124	0.106424	0.321703	8.16215e-09	0.0526561	0.00667949	0.00344704	0.939061
GNGT2	2.79109e-68	0	1.15029e-38	0	0.61365	0.105977	0.319088	8.5514e-09	0.0527213	0.0263493	0.0136017	0.939061
RAPGEF2	2.52974e-68	0	1.27087e-38	0	0.618484	0.104412	0.321158	8.14848e-09	0.05276	-0.00516547	0.00266688	0.939061
C6orf10	5.7851e-68	0	1.17364e-38	0	0.621957	0.105682	0.32186	8.18649e-09	0.0528081	0.00579857	0.00299435	0.939061
ITPK1	4.4748e-68	0	1.1891e-38	0	0.623574	0.104521	0.32418	9.30357e-09	0.0528342	0.00581433	0.00300282	0.939061
CAPN2	6.53783e-68	0	1.28964e-38	0	0.625075	0.106494	0.321332	9.11621e-09	0.0528664	0.0027616	0.00142643	0.939061
ZNF816-ZNF321P	2.38329e-68	0	1.18586e-38	0	0.616902	0.105107	0.32029	9.56316e-09	0.0528682	-0.0189557	0.00979109	0.939061
GPLD1	4.78986e-68	0	1.28311e-38	0	0.617869	0.105465	0.324569	8.41176e-09	0.0528818	0.00309602	0.00159927	0.939061
MRTO4	4.18802e-68	0	1.28372e-38	0	0.616654	0.106	0.327747	8.76268e-09	0.0528888	0.0097979	0.00506131	0.939061
C19orf67	2.4866e-68	0	1.226e-38	0	0.621726	0.105869	0.320867	8.15956e-09	0.0529208	-0.00504266	0.00260524	0.939061
IL13RA2	3.87722e-68	0	1.23365e-38	0	0.61832	0.107265	0.320298	8.61175e-09	0.0529625	0.0266912	0.0137922	0.939061
SHROOM4	2.04565e-68	0	1.29558e-38	0	0.613475	0.105881	0.31604	9.91982e-09	0.0530509	-0.00505104	0.002611	0.939061
SNCAIP	4.29085e-68	0	1.15308e-38	0	0.621192	0.103577	0.321301	9.18055e-09	0.05307	0.00320849	0.00165868	0.939061
FLT1	4.79621e-68	0	1.35292e-38	0	0.614862	0.103197	0.318185	9.91756e-09	0.0531673	0.00398576	0.00206134	0.939061
PSMD4	2.83919e-68	0	1.07458e-38	0	0.621394	0.103855	0.32087	9.08151e-09	0.0532408	-0.0155836	0.00806199	0.939061
AKAP1	2.27541e-68	0	1.22623e-38	0	0.620753	0.106046	0.323447	8.92895e-09	0.0533144	-0.00533133	0.00275895	0.939061
CCDC39	5.80608e-68	0	1.14045e-38	0	0.623513	0.105073	0.321884	9.66962e-09	0.053453	0.00314512	0.00162853	0.939061
ZNF618	2.40583e-68	0	1.26471e-38	0	0.613025	0.106958	0.322415	9.02058e-09	0.0534556	-0.00537951	0.00278553	0.939061
GFRA1	2.5602e-68	0	1.20843e-38	0	0.614463	0.105037	0.319259	8.63293e-09	0.053459	-0.00833326	0.00431504	0.939061
FAM110D	3.74611e-68	0	1.37875e-38	0	0.616136	0.106104	0.321968	8.61261e-09	0.0534739	0.00995902	0.0051572	0.939061
LYG1	3.86945e-68	0	1.35012e-38	0	0.615677	0.105286	0.322776	8.64511e-09	0.0535521	0.00859066	0.00445006	0.939061
FBRS	5.34759e-68	0	1.35025e-38	0	0.620822	0.106357	0.32438	9.33306e-09	0.0536604	0.00582407	0.0030183	0.939061
AMY2A	4.13123e-68	0	1.35616e-38	0	0.615216	0.104621	0.319743	8.88945e-09	0.053754	0.00798905	0.00414192	0.939061
SIK3	2.04547e-68	0	1.09606e-38	0	0.617571	0.10552	0.321385	9.20321e-09	0.0537586	-0.003931	0.00203806	0.939061
SLC10A6	4.74501e-68	0	1.23892e-38	0	0.623024	0.107061	0.323212	8.39034e-09	0.0537789	0.00754702	0.00391315	0.939061
KRT83	3.95278e-68	0	1.2093e-38	0	0.613997	0.106025	0.322757	1.03555e-08	0.0538077	0.00422621	0.00219157	0.939061
PNPLA3	3.59309e-68	0	1.22241e-38	0	0.61063	0.106849	0.322273	8.33413e-09	0.0538189	0.00477047	0.00247392	0.939061
KLC3	2.05114e-68	0	1.24603e-38	0	0.614815	0.10764	0.32596	8.78393e-09	0.0539114	-0.00281125	0.00145845	0.939061
ADAM8	4.73077e-68	0	1.17764e-38	0	0.620529	0.105636	0.319577	8.56072e-09	0.0539118	0.00411229	0.00213342	0.939061
LMO7	1.73858e-68	0	1.29517e-38	0	0.615324	0.105211	0.317735	9.04089e-09	0.0540515	-0.00261072	0.00135521	0.939061
ADAM29	3.20784e-68	0	1.30921e-38	0	0.61059	0.107852	0.323627	8.32042e-09	0.0540676	-0.00625567	0.00324749	0.939061
RAB31	3.53313e-68	0	1.30549e-38	0	0.61514	0.105976	0.324417	9.13882e-09	0.0540828	0.0146234	0.00759188	0.939061
PSG3	2.224e-68	0	1.25045e-38	0	0.611509	0.105439	0.322812	9.64778e-09	0.0541033	-0.00667959	0.00346807	0.939061
ZCCHC11	4.35944e-68	0	1.12302e-38	0	0.618822	0.105961	0.323472	8.82324e-09	0.0541103	0.00510546	0.00265086	0.939061
EPS8L1	2.57246e-68	0	1.27132e-38	0	0.620565	0.105147	0.319568	8.66841e-09	0.0541229	-0.0040264	0.00209069	0.939061
GAB2	2.81251e-68	0	1.28945e-38	0	0.619169	0.107684	0.320147	8.80222e-09	0.0541319	-0.00518045	0.00269003	0.939061
GPR33	2.45981e-68	0	1.31823e-38	0	0.613177	0.105882	0.320826	9.756e-09	0.0542051	-0.0080217	0.00416667	0.939061
IL6R	4.12338e-68	0	1.1735e-38	0	0.613723	0.103633	0.320807	9.01438e-09	0.054323	0.00728435	0.00378552	0.939061
ZNF233	3.65278e-68	0	1.0999e-38	0	0.618458	0.105496	0.320116	9.03016e-09	0.0543243	0.00519638	0.00270046	0.939061
RBMS1	3.78542e-68	0	1.21895e-38	0	0.616497	0.105335	0.321845	8.59814e-09	0.0543899	0.0107375	0.00558161	0.939061
HOXC6	3.46061e-68	0	1.2439e-38	0	0.61499	0.102099	0.319541	8.57675e-09	0.0543981	0.0100578	0.00522843	0.939061
CFAP100	1.89126e-68	0	1.30927e-38	0	0.612851	0.106605	0.322166	7.73314e-09	0.0544003	-0.00203038	0.00105548	0.939061
SUPT6H	4.56817e-68	0	1.2696e-38	0	0.614956	0.104776	0.318675	8.26913e-09	0.0544035	0.00426697	0.00221819	0.939061
BYSL	5.58171e-68	0	1.15086e-38	0	0.624059	0.106138	0.319511	8.22437e-09	0.0545268	0.00340479	0.00177089	0.939061
PNO1	3.01859e-68	0	1.13214e-38	0	0.606649	0.105316	0.320127	9.17325e-09	0.0545406	0.00992843	0.00516424	0.939061
PRDM4	2.38927e-68	0	1.26134e-38	0	0.614635	0.104816	0.329651	8.7077e-09	0.0545417	-0.00681416	0.00354438	0.939061
PSMD1	4.62983e-68	0	1.28865e-38	0	0.617479	0.105752	0.321889	9.23866e-09	0.0545747	0.00723052	0.00376146	0.939061
SCGB1C1	2.63072e-68	0	1.43861e-38	0	0.614222	0.106912	0.324013	9.1161e-09	0.0546219	-0.0200587	0.010437	0.939061
TSHZ3	2.43698e-68	0	1.28589e-38	0	0.622085	0.105083	0.31666	9.71476e-09	0.0546583	-0.00415167	0.00216053	0.939061
KIR2DL1	2.95241e-68	0	1.30134e-38	0	0.616319	0.104281	0.320817	8.75791e-09	0.0547259	0.0551778	0.0287225	0.939061
ATP5B	2.68369e-68	0	1.28492e-38	0	0.619153	0.106413	0.319297	9.694e-09	0.0547542	-0.00889012	0.00462825	0.939061
HOPX	2.95511e-68	0	1.32895e-38	0	0.618441	0.105982	0.319018	9.63151e-09	0.0547549	-0.00755487	0.00393313	0.939061
ABCC4	1.98907e-68	0	1.28906e-38	0	0.616028	0.105327	0.323059	9.29159e-09	0.0547985	-0.00295376	0.00153803	0.939061
DCTD	3.98051e-68	0	1.27696e-38	0	0.616197	0.107007	0.318727	1.0263e-08	0.0548441	0.00830378	0.0043246	0.939061
PRR14	2.47479e-68	0	1.2937e-38	0	0.615183	0.103806	0.327651	9.19222e-09	0.0549374	-0.00599468	0.00312323	0.939061
KCNH5	4.54175e-68	0	1.3107e-38	0	0.619015	0.105203	0.321355	9.04755e-09	0.0549511	0.00592604	0.00308764	0.939061
FOXJ3	3.78405e-68	0	1.31431e-38	0	0.61781	0.103361	0.324072	8.83228e-09	0.0550258	0.0101151	0.00527187	0.939061
KCNE3	4.13658e-68	0	1.25162e-38	0	0.615444	0.105543	0.326666	9.63839e-09	0.0550429	0.0092426	0.00481748	0.939061
TBCCD1	4.11338e-68	0	1.29924e-38	0	0.615482	0.105175	0.318483	9.44727e-09	0.0550791	0.00803342	0.00418785	0.939061
GRK2	3.78199e-68	0	1.28356e-38	0	0.615398	0.106265	0.321642	8.45406e-09	0.0550966	0.00874522	0.00455924	0.939061
THAP5	2.73366e-68	0	1.14608e-38	0	0.616299	0.106645	0.32354	8.66799e-09	0.055228	-0.0118031	0.00615678	0.939061
NEIL2	3.98598e-68	0	1.33353e-38	0	0.618122	0.106028	0.321402	8.56721e-09	0.0552871	0.00734097	0.00383015	0.939061
NCOA3	2.36764e-68	0	1.10116e-38	0	0.619263	0.106547	0.32415	9.80754e-09	0.0553202	-0.00435075	0.00227031	0.939061
GREB1L	6.76095e-68	0	1.39891e-38	0	0.617041	0.10732	0.322657	8.25965e-09	0.0553247	0.00310697	0.00162131	0.939061
TFAP2E	4.30829e-68	0	1.2858e-38	0	0.609447	0.106651	0.319693	8.88528e-09	0.0553604	0.00329622	0.00172032	0.939061
ANGPTL4	2.54601e-68	0	1.25959e-38	0	0.623139	0.104563	0.324176	8.62975e-09	0.0555994	-0.00373105	0.00194917	0.939061
SCGB2B2	3.34698e-68	0	1.33577e-38	0	0.621626	0.106652	0.317369	9.13225e-09	0.0556631	0.0216922	0.0113354	0.939061
ZNF526	4.24336e-68	0	1.22112e-38	0	0.618335	0.10687	0.318316	9.08145e-09	0.0556658	0.00727413	0.00380117	0.939061
POLR3B	2.16224e-68	0	1.25303e-38	0	0.61409	0.104707	0.324737	9.12756e-09	0.0556768	-0.00427041	0.00223165	0.939061
C10orf82	3.83827e-68	0	1.17404e-38	0	0.620975	0.105726	0.323967	8.90326e-09	0.0557202	0.0125321	0.00655023	0.939061
UBR4	6.24369e-68	0	1.22445e-38	0	0.62166	0.105433	0.321313	8.65459e-09	0.0558039	0.002189	0.00114453	0.939061
HMGXB4	2.9086e-68	0	1.2485e-38	0	0.615991	0.106356	0.320899	9.3365e-09	0.0558271	-0.00848006	0.00443425	0.939061
FADS2	3.9251e-68	0	1.33604e-38	0	0.614469	0.10591	0.321567	8.7995e-09	0.0558379	0.0179297	0.00937592	0.939061
SOSTDC1	2.75124e-68	0	1.28337e-38	0	0.612	0.105246	0.320709	8.56567e-09	0.0558501	-0.00993056	0.00519321	0.939061
CCNT2	4.30135e-68	0	1.3727e-38	0	0.622922	0.104388	0.320851	9.06113e-09	0.0559255	0.0120318	0.006294	0.939061
ARMC4	2.12856e-68	0	1.32822e-38	0	0.617228	0.104021	0.321639	8.29854e-09	0.0559771	-0.00255946	0.00133917	0.939061
RPS7	3.34653e-68	0	1.23744e-38	0	0.615599	0.104565	0.318555	9.01789e-09	0.0561502	0.0278475	0.0145807	0.939061
CTTNBP2NL	4.11898e-68	0	1.37456e-38	0	0.611459	0.106096	0.323203	8.0422e-09	0.0562001	0.00681976	0.0035715	0.939061
CD44	4.61309e-68	0	1.44212e-38	0	0.615398	0.104618	0.321333	9.71918e-09	0.0562959	0.00388321	0.00203442	0.939061
LRRC23	2.81859e-68	0	1.25707e-38	0	0.614036	0.10811	0.319867	8.63291e-09	0.0563056	-0.00732737	0.00383898	0.939061
BAK1	2.50689e-68	0	1.2914e-38	0	0.612401	0.105011	0.321983	8.71077e-09	0.0563369	-0.00789034	0.00413446	0.939061
HRG	2.50581e-68	0	1.24716e-38	0	0.619907	0.105768	0.321788	1.03759e-08	0.0563415	-0.00354424	0.00185718	0.939061
C11orf68	2.74843e-68	0	1.30962e-38	0	0.611675	0.104716	0.322612	9.54421e-09	0.0563664	-0.0142817	0.00748436	0.939061
PLA2G15	2.46666e-68	0	1.36359e-38	0	0.615522	0.105843	0.320539	9.64041e-09	0.0563983	-0.00464037	0.00243211	0.939061
CPSF2	4.03993e-68	0	1.19408e-38	0	0.618564	0.106596	0.32193	8.58026e-09	0.0564409	0.00850516	0.00445849	0.939061
PLEK2	2.4664e-68	0	1.35222e-38	0	0.612646	0.105462	0.322031	9.79211e-09	0.0564595	-0.00579397	0.00303749	0.939061
SOS1	2.21408e-68	0	1.38216e-38	0	0.612312	0.105814	0.318072	9.34883e-09	0.056472	-0.00642201	0.00336691	0.939061
UBL4B	2.83244e-68	0	1.18021e-38	0	0.613346	0.107076	0.323118	1.00029e-08	0.0564772	-0.0182545	0.00957059	0.939061
TRPC7	2.47117e-68	0	1.3224e-38	0	0.614228	0.105423	0.318655	8.95454e-09	0.05658	-0.00588948	0.00308906	0.939928
SMC6	3.02926e-68	0	1.49963e-38	0	0.614166	0.107405	0.318459	9.42312e-09	0.0567297	-0.0069058	0.00362432	0.94072
HS3ST6	2.53201e-68	0	1.34834e-38	0	0.615003	0.106103	0.319645	9.21231e-09	0.0567529	-0.00471783	0.00247626	0.94072
DOCK8	7.47285e-68	0	1.34273e-38	0	0.622126	0.107629	0.325889	8.1876e-09	0.0568105	0.00184956	0.000971009	0.94072
SLC6A4	2.72311e-68	0	1.28392e-38	0	0.61541	0.104898	0.324075	9.43733e-09	0.0568855	-0.00817066	0.00429085	0.94072
YAF2	3.98796e-68	0	1.29141e-38	0	0.617388	0.106901	0.325287	8.67558e-09	0.0569766	0.0175098	0.00919869	0.94072
ZSWIM5	1.98988e-68	0	1.30168e-38	0	0.618892	0.105413	0.322487	8.81669e-09	0.0570452	-0.00261555	0.00137445	0.94072
SCPEP1	4.42007e-68	0	1.25315e-38	0	0.623607	0.104492	0.325046	9.72401e-09	0.0570512	0.00569165	0.00299099	0.94072
TAS2R19	3.95192e-68	0	1.39085e-38	0	0.61559	0.106041	0.320592	9.23e-09	0.0570763	0.0150564	0.00791302	0.94072
GRK7	2.33282e-68	0	1.1049e-38	0	0.618365	0.106253	0.323212	8.38358e-09	0.0571515	-0.00338503	0.00177956	0.94072
ZIC3	2.64639e-68	0	1.24841e-38	0	0.620494	0.107101	0.322551	8.24076e-09	0.0571788	-0.00723283	0.00380283	0.94072
TACC2	1.96091e-68	0	1.38e-38	0	0.614753	0.106262	0.323845	9.89795e-09	0.0571854	-0.00317575	0.00166977	0.94072
B9D1	3.74099e-68	0	1.34291e-38	0	0.615434	0.106256	0.322218	8.86089e-09	0.0572703	0.00847396	0.00445703	0.940847
GCLM	2.68766e-68	0	1.28658e-38	0	0.61049	0.107231	0.320664	8.92179e-09	0.0573317	-0.00920309	0.00484172	0.940847
DBX1	5.20292e-68	0	1.38006e-38	0	0.61638	0.106356	0.322274	1.02493e-08	0.0573452	0.00313946	0.00165175	0.940847
SPATA24	2.53365e-68	0	1.346e-38	0	0.621116	0.104711	0.320462	9.61947e-09	0.0574682	-0.00563928	0.00296844	0.942032
RCVRN	3.20441e-68	0	1.35894e-38	0	0.617539	0.105346	0.317038	9.68225e-09	0.0576041	-0.0108102	0.00569345	0.942756
ABLIM1	5.01149e-68	0	1.30762e-38	0	0.620708	0.104793	0.323459	7.8969e-09	0.057614	0.00435456	0.00229352	0.942756
ARAP2	1.8872e-68	0	1.20909e-38	0	0.611498	0.106359	0.322598	8.9834e-09	0.0578261	-0.00253477	0.00133618	0.945392
GNL3	3.72283e-68	0	1.18217e-38	0	0.615135	0.105467	0.327613	8.68242e-09	0.0579763	0.00679833	0.00358582	0.947015
GJA10	4.89301e-68	0	1.17668e-38	0	0.613883	0.106063	0.320662	8.55736e-09	0.0580572	0.00245443	0.00129502	0.947501
TCF20	2.15606e-68	0	1.26866e-38	0	0.614913	0.105715	0.322115	9.35533e-09	0.058291	-0.00398595	0.00210505	0.950481
BIRC7	2.24922e-68	0	1.17883e-38	0	0.614574	0.105324	0.322154	8.83409e-09	0.0583603	-0.00516187	0.00272683	0.950777
HR	6.76521e-68	0	1.26321e-38	0	0.622278	0.104054	0.323183	9.82886e-09	0.0584453	0.00264064	0.00139542	0.951325
CDO1	4.00577e-68	0	1.36485e-38	0	0.610483	0.10523	0.327696	8.63334e-09	0.0585564	0.00473276	0.00250209	0.951579
NRCAM	2.11311e-68	0	1.19202e-38	0	0.618175	0.103794	0.323688	7.38035e-09	0.058648	-0.00284938	0.00150694	0.951579
APOL2	4.03113e-68	0	1.26273e-38	0	0.61823	0.10703	0.322124	9.58456e-09	0.058656	0.0128653	0.00680424	0.951579
UBL3	3.39703e-68	0	1.1051e-38	0	0.621579	0.106901	0.321635	8.19419e-09	0.0587641	0.021011	0.0111171	0.951579
TSPAN19	2.84872e-68	0	1.36517e-38	0	0.611537	0.105559	0.316416	9.91852e-09	0.0588123	-0.013149	0.00695856	0.951579
DCAF10	4.96058e-68	0	1.20239e-38	0	0.620108	0.106095	0.324286	8.73998e-09	0.0588303	0.00569792	0.00301561	0.951579
ZNF552	3.71845e-68	0	1.23803e-38	0	0.612875	0.106675	0.323432	8.79419e-09	0.0588599	0.00694838	0.00367784	0.951579
FAM129B	6.27599e-68	0	1.36411e-38	0	0.625279	0.105638	0.32143	9.00192e-09	0.0588914	0.00338084	0.00178973	0.951579
GALNT9	4.5431e-68	0	1.36709e-38	0	0.615249	0.107351	0.320364	9.19313e-09	0.0589432	0.00446196	0.00236254	0.951579
PDE10A	2.21987e-68	0	1.35752e-38	0	0.614967	0.107853	0.321126	9.89002e-09	0.0590109	-0.00484853	0.0025679	0.951579
NOL12	3.97892e-68	0	1.26748e-38	0	0.615373	0.106118	0.317903	8.99476e-09	0.0590718	0.00743278	0.00393754	0.951579
KIF1C	6.71359e-68	0	1.17058e-38	0	0.617647	0.105243	0.317634	9.40821e-09	0.0591748	0.00200419	0.00106216	0.951579
SCNM1	3.04169e-68	0	1.18886e-38	0	0.617886	0.104322	0.323886	8.72311e-09	0.0591822	-0.0138164	0.00732248	0.951579
PNPLA5	2.50573e-68	0	1.287e-38	0	0.61252	0.108071	0.325282	9.40001e-09	0.0592282	-0.00494287	0.00262011	0.951579
MAVS	2.59556e-68	0	1.25324e-38	0	0.614956	0.105843	0.320794	8.81184e-09	0.0592985	-0.00687835	0.00364708	0.951579
PPP2R2A	3.16805e-68	0	1.22084e-38	0	0.616992	0.106709	0.324348	8.41079e-09	0.0593126	-0.0206741	0.0109625	0.951579
SELENBP1	2.43386e-68	0	1.18133e-38	0	0.614486	0.107184	0.323646	9.157e-09	0.0593327	-0.00562731	0.00298415	0.951579
KCNAB1	2.73543e-68	0	1.3016e-38	0	0.62043	0.104203	0.325604	9.41054e-09	0.0596548	-0.00836572	0.00444193	0.952739
NPY1R	4.62501e-68	0	1.31739e-38	0	0.614902	0.105241	0.318703	9.08022e-09	0.0596814	0.00887761	0.00471422	0.952739
TRIM37	4.93757e-68	0	1.23475e-38	0	0.614098	0.107408	0.325718	7.70563e-09	0.0596915	0.00368488	0.00195683	0.952739
CDH9	2.32535e-68	0	1.21918e-38	0	0.615485	0.106498	0.318591	9.75251e-09	0.059823	-0.00455728	0.00242137	0.952739
ACTG1	3.69323e-68	0	1.31837e-38	0	0.621004	0.104765	0.316255	8.59371e-09	0.0599166	0.0292798	0.0155626	0.952739
AK1	3.22218e-68	0	1.34613e-38	0	0.619842	0.106169	0.326198	9.03739e-09	0.0600294	-0.00655888	0.00348767	0.952739
NRDE2	1.86287e-68	0	1.20778e-38	0	0.617849	0.105123	0.323133	7.66318e-09	0.060199	-0.00234864	0.00124971	0.952739
CD33	2.83165e-68	0	1.26813e-38	0	0.611192	0.107463	0.317341	8.75714e-09	0.0602537	-0.00787715	0.00419232	0.952739
EDIL3	5.03876e-68	0	1.26214e-38	0	0.619329	0.106597	0.323703	8.43726e-09	0.0603254	0.00474749	0.00252738	0.952739
POLE4	3.95461e-68	0	1.42395e-38	0	0.615041	0.105475	0.325087	8.35081e-09	0.0604546	0.0160686	0.0085586	0.952739
CES4A	2.34391e-68	0	1.14764e-38	0	0.61493	0.106316	0.322286	9.58529e-09	0.0604828	-0.0073575	0.00391925	0.952739
PDAP1	2.29679e-68	0	1.18005e-38	0	0.613521	0.103417	0.32174	9.43912e-09	0.0605173	-0.00759142	0.0040444	0.952739
PDP1	3.63687e-68	0	1.41151e-38	0	0.612296	0.107356	0.322192	8.12046e-09	0.0605572	0.011822	0.00629925	0.952739
LHFP	2.87081e-68	0	1.23361e-38	0	0.613398	0.105362	0.320466	8.86596e-09	0.0605652	-0.0144133	0.00768022	0.952739
TTBK1	2.14815e-68	0	1.35368e-38	0	0.621191	0.106011	0.319228	9.05731e-09	0.060571	-0.0032994	0.00175815	0.952739
GEMIN5	6.19847e-68	0	1.27425e-38	0	0.614159	0.106021	0.324392	8.58396e-09	0.0605798	0.00214994	0.00114568	0.952739
CASKIN2	2.12261e-68	0	1.3118e-38	0	0.617528	0.106967	0.323366	7.39191e-09	0.0606211	-0.00221191	0.00117889	0.952739
TARS2	2.94674e-68	0	1.29857e-38	0	0.622262	0.104571	0.322423	9.34372e-09	0.0606258	-0.00526467	0.00280598	0.952739
TECPR2	2.30221e-68	0	1.31929e-38	0	0.617112	0.107598	0.322851	9.30214e-09	0.0607003	-0.00295007	0.00157279	0.952739
DCBLD2	2.77595e-68	0	1.3913e-38	0	0.617587	0.10565	0.325522	9.50473e-09	0.0608102	-0.00450792	0.00240437	0.952739
NCK2	3.11057e-68	0	1.3667e-38	0	0.621002	0.106397	0.325932	8.83218e-09	0.0608192	-0.00990973	0.00528569	0.952739
KERA	4.13061e-68	0	1.32322e-38	0	0.620469	0.106785	0.32119	8.7051e-09	0.0609424	0.0113093	0.00603506	0.952739
KRTAP6-2	3.02828e-68	0	1.16062e-38	0	0.616444	0.105544	0.318451	9.02054e-09	0.0609452	-0.0181263	0.00967298	0.952739
HS1BP3	2.10689e-68	0	1.31636e-38	0	0.611117	0.107711	0.322809	9.64872e-09	0.0609573	-0.00270686	0.00144457	0.952739
SRRD	2.81342e-68	0	1.27317e-38	0	0.616535	0.104226	0.316639	9.0568e-09	0.0609927	-0.0095346	0.00508902	0.952739
TFB1M	3.98719e-68	0	1.20329e-38	0	0.618109	0.107069	0.320828	9.34765e-09	0.0610385	0.00672669	0.00359095	0.952739
RXFP3	3.86581e-68	0	1.26456e-38	0	0.617024	0.105466	0.319013	9.05506e-09	0.06108	0.00871166	0.00465135	0.952739
DEFB4A	4.00797e-68	0	1.26221e-38	0	0.621383	0.107493	0.325487	8.5405e-09	0.0610809	0.0413403	0.0220726	0.952739
GBGT1	5.36547e-68	0	1.21494e-38	0	0.619339	0.106508	0.317268	8.1743e-09	0.0610831	0.00321701	0.00171766	0.952739
DPYD	4.93236e-68	0	1.19553e-38	0	0.612636	0.105098	0.320036	9.02612e-09	0.0611232	0.00262127	0.00139979	0.952739
SLC12A2	2.33577e-68	0	1.20236e-38	0	0.613571	0.105589	0.318648	8.82964e-09	0.0611869	-0.00620139	0.00331243	0.952739
ACOT2	2.73082e-68	0	1.28933e-38	0	0.61675	0.10515	0.324899	8.74914e-09	0.0612795	-0.00816247	0.00436149	0.952739
PRDM1	3.02421e-68	0	1.39832e-38	0	0.616678	0.106466	0.31821	9.28413e-09	0.0612866	-0.00646384	0.00345395	0.952739
CALCRL	2.62844e-68	0	1.27982e-38	0	0.617584	0.106141	0.322568	9.76707e-09	0.0613433	-0.00963729	0.0051508	0.952739
RNASE7	3.04177e-68	0	1.21162e-38	0	0.612056	0.107056	0.321756	9.22711e-09	0.0615026	-0.0115681	0.00618654	0.952739
ZFYVE27	6.2945e-68	0	1.3096e-38	0	0.622315	0.106076	0.321213	1.0133e-08	0.0615671	0.00343074	0.00183519	0.952739
NDUFC1	2.84305e-68	0	1.30545e-38	0	0.613949	0.106091	0.326212	8.67459e-09	0.0615888	-0.0356173	0.0190542	0.952739
PRKAR1B	4.53702e-68	0	1.18372e-38	0	0.62571	0.106209	0.325118	9.22644e-09	0.0615973	0.00644265	0.00344675	0.952739
KRTAP1-1	3.5828e-68	0	1.4257e-38	0	0.620161	0.104498	0.321631	8.93742e-09	0.0615989	0.00855024	0.00457431	0.952739
OR6C2	2.36346e-68	0	1.26646e-38	0	0.611889	0.10684	0.316247	9.27072e-09	0.06166	-0.0053401	0.00285758	0.952739
MMS22L	2.29473e-68	0	1.32228e-38	0	0.612167	0.103678	0.319631	8.85249e-09	0.0617054	-0.0047824	0.00255959	0.952739
IREB2	5.06828e-68	0	1.37486e-38	0	0.613664	0.107416	0.322439	8.39042e-09	0.0617942	0.00390938	0.00209306	0.952739
ZG16	2.93061e-68	0	1.37199e-38	0	0.620668	0.102502	0.316844	9.31882e-09	0.061815	-0.00682084	0.00365213	0.952739
CNPY3	2.75992e-68	0	1.27939e-38	0	0.612876	0.105261	0.32263	8.94611e-09	0.0618338	-0.0119942	0.00642259	0.952739
WDR82	2.72247e-68	0	1.12219e-38	0	0.6145	0.105742	0.317911	9.20428e-09	0.0618499	-0.0212566	0.0113831	0.952739
ZFHX2	2.01764e-68	0	1.20927e-38	0	0.617543	0.104415	0.319877	8.69682e-09	0.06188	-0.00298603	0.00159923	0.952739
ARFIP2	4.05047e-68	0	1.36941e-38	0	0.617893	0.10679	0.325462	9.3489e-09	0.0619113	0.0116211	0.00622466	0.952739
TMPPE	4.46061e-68	0	1.2671e-38	0	0.6146	0.107696	0.322974	8.91159e-09	0.062017	0.0111425	0.00597071	0.952739
COPG2	3.57805e-68	0	1.29027e-38	0	0.616319	0.1038	0.324891	8.77444e-09	0.0620342	0.0094172	0.00504655	0.952739
PRR15L	4.33029e-68	0	1.18644e-38	0	0.616692	0.106809	0.322697	8.55694e-09	0.0620658	0.00473112	0.00253565	0.952739
ERRFI1	4.17169e-68	0	1.25009e-38	0	0.620001	0.107129	0.322599	8.43109e-09	0.0621432	0.00586937	0.00314663	0.952739
CORT	3.41174e-68	0	1.27236e-38	0	0.617156	0.105759	0.322336	9.22745e-09	0.0623119	0.0289806	0.0155468	0.952739
F2	3.0443e-68	0	1.24658e-38	0	0.619532	0.103674	0.321798	8.3007e-09	0.0623642	-0.00683944	0.00366979	0.952739
RHBDF1	4.25214e-68	0	1.39029e-38	0	0.616135	0.106391	0.320644	8.3238e-09	0.0623814	0.00478403	0.00256711	0.952739
ALG12	2.55596e-68	0	1.36838e-38	0	0.618444	0.103939	0.322369	8.57614e-09	0.0624735	-0.00592552	0.00318075	0.952739
CES2	3.89347e-68	0	1.12427e-38	0	0.621228	0.104748	0.322319	9.26584e-09	0.0624922	0.00549615	0.00295047	0.952739
ING5	3.61144e-68	0	1.15586e-38	0	0.617976	0.106009	0.318952	8.54205e-09	0.0624924	0.0114424	0.00614261	0.952739
LRCOL1	3.43052e-68	0	1.17267e-38	0	0.613989	0.104764	0.318086	8.86892e-09	0.0626069	0.0700892	0.0376422	0.952739
PLSCR5	2.71851e-68	0	1.35577e-38	0	0.617904	0.102984	0.32548	8.63058e-09	0.0626121	-0.00652667	0.00350529	0.952739
MBD6	2.1712e-68	0	1.16318e-38	0	0.615424	0.104632	0.326909	8.22076e-09	0.0626656	-0.00350174	0.00188107	0.952739
CLPB	2.2559e-68	0	1.14524e-38	0	0.622034	0.104762	0.32264	9.40042e-09	0.0626668	-0.00311596	0.00167384	0.952739
FAAH2	5.23075e-68	0	1.29924e-38	0	0.613874	0.105461	0.320155	9.60694e-09	0.062693	0.0028846	0.00154971	0.952739
DCHS2	7.29815e-68	0	1.14957e-38	0	0.618183	0.104316	0.323408	8.31126e-09	0.0627421	0.00141368	0.000759621	0.952739
RGL4	4.69785e-68	0	1.37881e-38	0	0.617264	0.105463	0.323317	8.31002e-09	0.0628538	0.00931938	0.00500978	0.952739
TRIM52	3.2567e-68	0	1.15129e-38	0	0.61021	0.10561	0.319479	8.15972e-09	0.0628657	0.0129629	0.00696873	0.952739
TEAD4	4.42397e-68	0	1.18507e-38	0	0.61552	0.105468	0.319996	7.85714e-09	0.0629077	0.00563631	0.0030305	0.952739
DNAJC5B	2.85455e-68	0	1.28295e-38	0	0.61563	0.104973	0.31722	9.593e-09	0.0629762	-0.00653028	0.00351209	0.952739
NTHL1	3.7236e-68	0	1.19741e-38	0	0.610603	0.104572	0.3203	8.89764e-09	0.0629989	0.00322926	0.00173689	0.952739
P2RY12	4.01145e-68	0	1.35267e-38	0	0.612815	0.10665	0.318313	8.85122e-09	0.0630087	0.0138679	0.0074593	0.952739
LINS1	3.5014e-68	0	1.25335e-38	0	0.621055	0.105353	0.326635	9.14274e-09	0.0631163	0.00767261	0.00412864	0.952739
C10orf126	3.43461e-68	0	1.30324e-38	0	0.621215	0.105822	0.322607	8.376e-09	0.0632926	0.043774	0.0235706	0.952739
CSGALNACT2	2.49206e-68	0	1.21521e-38	0	0.612402	0.106031	0.321252	8.74917e-09	0.0635037	-0.00612911	0.00330292	0.952739
OR51B2	4.00295e-68	0	1.37269e-38	0	0.612996	0.105646	0.319451	9.08666e-09	0.0635071	0.010426	0.00561855	0.952739
FOXRED2	5.08052e-68	0	1.25188e-38	0	0.618955	0.106003	0.323274	8.48675e-09	0.0635735	0.00416806	0.00224672	0.952739
SLC10A2	4.1646e-68	0	1.17969e-38	0	0.611794	0.105169	0.320371	8.91156e-09	0.0637558	0.00321729	0.00173542	0.952739
SIT1	3.97387e-68	0	1.19925e-38	0	0.612683	0.105073	0.324395	8.54541e-09	0.0637899	0.00657499	0.00354703	0.952739
MANSC1	2.80266e-68	0	1.17533e-38	0	0.615953	0.105132	0.321385	8.88828e-09	0.0638242	-0.0104689	0.00564844	0.952739
OR2AG1	4.32226e-68	0	1.27675e-38	0	0.620636	0.105617	0.322563	8.63759e-09	0.0638346	0.00942882	0.00508745	0.952739
S100A5	3.87769e-68	0	1.40061e-38	0	0.612853	0.105986	0.323927	8.53499e-09	0.0638554	0.0136914	0.00738795	0.952739
CUL5	2.93758e-68	0	1.24176e-38	0	0.614228	0.105694	0.324121	9.19925e-09	0.0638792	-0.014516	0.00783366	0.952739
RFXANK	2.47777e-68	0	1.15362e-38	0	0.612302	0.106478	0.320002	9.03526e-09	0.0639741	-0.00970747	0.00524055	0.952739
TPRG1	3.53016e-68	0	1.19114e-38	0	0.613565	0.106892	0.32243	8.81627e-09	0.0639753	0.00990757	0.00534861	0.952739
MORN1	5.33546e-68	0	1.25108e-38	0	0.622722	0.105522	0.321689	8.2542e-09	0.0640075	0.00405097	0.00218718	0.952739
AKR7A3	2.40692e-68	0	1.16793e-38	0	0.621777	0.10506	0.324131	8.88283e-09	0.0640279	-0.00390422	0.00210811	0.952739
MGRN1	2.44239e-68	0	1.19885e-38	0	0.617762	0.105467	0.317746	9.31308e-09	0.0641393	-0.00458299	0.00247565	0.952739
TMPRSS11D	3.71594e-68	0	1.27403e-38	0	0.615864	0.10425	0.323264	8.37007e-09	0.064282	0.00497115	0.00268677	0.952739
POGLUT1	3.42279e-68	0	1.16742e-38	0	0.608516	0.105284	0.318168	8.55042e-09	0.0643191	0.00685772	0.00370692	0.952739
TIMP2	3.0493e-68	0	1.33703e-38	0	0.612841	0.106437	0.319288	8.68029e-09	0.0643265	-0.0131939	0.00713215	0.952739
ASB17	3.74348e-68	0	1.23109e-38	0	0.619005	0.106823	0.321951	8.8216e-09	0.0643729	0.0104969	0.00567523	0.952739
POR	4.9509e-68	0	1.21244e-38	0	0.612761	0.105134	0.320531	8.24484e-09	0.064406	0.0027618	0.00149337	0.952739
EMC3	2.70638e-68	0	1.21749e-38	0	0.614095	0.103744	0.321861	9.0977e-09	0.0644424	-0.0164189	0.00887929	0.952739
OR4E2	4.50272e-68	0	1.18923e-38	0	0.615499	0.105184	0.318217	8.80624e-09	0.0644908	0.00726277	0.0039284	0.952739
TMEM234	4.30439e-68	0	1.23157e-38	0	0.619198	0.10675	0.318115	8.98195e-09	0.0645432	0.0121718	0.00658494	0.952739
RDM1	3.03618e-68	0	1.28113e-38	0	0.617949	0.106303	0.321887	8.97746e-09	0.0645468	-0.0131688	0.00712445	0.952739
OR4C3	2.62404e-68	0	1.26025e-38	0	0.61331	0.10538	0.320864	8.94584e-09	0.0646122	-0.0108535	0.00587327	0.952739
LTB	4.46875e-68	0	1.32326e-38	0	0.626458	0.104295	0.319394	9.70129e-09	0.0646487	0.0132756	0.00718493	0.952739
NUP188	2.10778e-68	0	1.44587e-38	0	0.620068	0.106573	0.322571	1.01622e-08	0.064684	-0.0018775	0.00101627	0.952739
AKAP10	3.52777e-68	0	1.27627e-38	0	0.614502	0.104751	0.321792	9.19165e-09	0.0647728	0.0105298	0.00570153	0.952739
AICDA	3.04575e-68	0	1.38473e-38	0	0.616167	0.105505	0.322374	9.05733e-09	0.0648159	-0.0154471	0.00836544	0.952739
UPK2	4.38274e-68	0	1.29459e-38	0	0.61551	0.105929	0.321359	9.0344e-09	0.0649171	0.00468146	0.00253622	0.952739
MAP3K2	4.57911e-68	0	1.23891e-38	0	0.620473	0.106359	0.321346	8.54784e-09	0.0649186	0.00560127	0.00303455	0.952739
OR52B6	2.57675e-68	0	1.16055e-38	0	0.62003	0.107	0.325678	9.37436e-09	0.0649258	-0.0101841	0.00551747	0.952739
HSPBP1	2.7575e-68	0	1.42996e-38	0	0.613671	0.105656	0.319238	8.97521e-09	0.0649296	-0.00500507	0.00271166	0.952739
KIF5A	4.70982e-68	0	1.37571e-38	0	0.617317	0.105463	0.321539	9.45121e-09	0.0649423	0.00413196	0.00223873	0.952739
FCMR	2.81734e-68	0	1.17851e-38	0	0.617058	0.105151	0.319736	8.84307e-09	0.0649997	-0.0104255	0.00564985	0.952739
PRM3	2.29746e-68	0	1.36562e-38	0	0.615113	0.105142	0.319828	1.01931e-08	0.0650006	-0.00436637	0.00236626	0.952739
NOCT	2.43476e-68	0	1.17753e-38	0	0.617859	0.106449	0.317108	9.34474e-09	0.0650668	-0.00478912	0.00259599	0.952739
CENPW	4.29069e-68	0	1.25774e-38	0	0.613937	0.106137	0.31925	9.20733e-09	0.0651415	0.00636855	0.0034531	0.952739
EOMES	5.47495e-68	0	1.33131e-38	0	0.617351	0.104606	0.320756	9.2867e-09	0.0652389	0.00618951	0.00335724	0.952739
PDS5A	3.0188e-68	0	1.38316e-38	0	0.617417	0.105596	0.322084	9.30772e-09	0.0652913	-0.0072123	0.00391277	0.952739
TSSK1B	2.28967e-68	0	1.39494e-38	0	0.614092	0.106089	0.319479	8.05283e-09	0.0652931	-0.00467381	0.00253562	0.952739
HSD3B2	2.60519e-68	0	1.04232e-38	0	0.617515	0.104848	0.323766	7.71936e-09	0.0653382	-0.00729635	0.00395906	0.952739
INSL3	4.07845e-68	0	1.19493e-38	0	0.617649	0.106468	0.322333	1.04779e-08	0.0654078	0.00658387	0.00357339	0.952739
SALL1	2.46818e-68	0	1.11926e-38	0	0.611965	0.105934	0.322575	8.27455e-09	0.0654321	-0.00455791	0.00247402	0.952739
SRF	4.45484e-68	0	1.39124e-38	0	0.613012	0.105528	0.321969	8.83727e-09	0.0654688	0.00465144	0.00252513	0.952739
TMEM255B	2.08619e-68	0	1.26004e-38	0	0.615787	0.105713	0.323905	9.55448e-09	0.0654958	-0.00353269	0.00191799	0.952739
CRACR2B	3.94545e-68	0	1.13628e-38	0	0.615088	0.105792	0.320309	8.56048e-09	0.0655824	0.00715486	0.0038858	0.952739
ZNF568	5.32078e-68	0	1.38304e-38	0	0.620989	0.105438	0.318996	9.31181e-09	0.065658	0.00381185	0.0020708	0.952739
DNAI2	4.5166e-68	0	1.24111e-38	0	0.620109	0.106902	0.3228	8.04058e-09	0.0657881	0.00470438	0.0025569	0.952739
BNIP3	2.54396e-68	0	1.1114e-38	0	0.607557	0.105359	0.321079	8.89506e-09	0.0658054	-0.0160978	0.00874994	0.952739
CDC20B	4.68053e-68	0	1.21895e-38	0	0.616132	0.106319	0.320137	8.31912e-09	0.0658094	0.00446477	0.00242686	0.952739
ACKR2	4.01765e-68	0	1.20351e-38	0	0.61429	0.105063	0.320724	8.79226e-09	0.0659002	0.00629968	0.00342539	0.952739
PCOLCE	6.48319e-68	0	1.46133e-38	0	0.621264	0.106388	0.319626	8.57829e-09	0.0659015	0.00419017	0.00227837	0.952739
ATP11B	4.90418e-68	0	1.44257e-38	0	0.616554	0.10632	0.318403	9.04175e-09	0.0659727	0.00529619	0.00288052	0.952739
ABHD14B	4.10719e-68	0	1.3527e-38	0	0.611054	0.105377	0.317502	1.06101e-08	0.0661104	0.00821202	0.00446867	0.952739
TGM6	2.34559e-68	0	1.40109e-38	0	0.614993	0.106117	0.320068	9.05705e-09	0.0661379	-0.00394422	0.00214651	0.952739
TMEM213	3.70744e-68	0	1.20072e-38	0	0.618964	0.103343	0.316912	9.43438e-09	0.0661474	0.0137052	0.00745889	0.952739
ZNF284	3.16765e-68	0	1.30556e-38	0	0.616902	0.104817	0.323886	9.29167e-09	0.0661556	-0.00732252	0.0039853	0.952739
ALDOB	5.12597e-68	0	1.20114e-38	0	0.621004	0.103419	0.322287	8.74124e-09	0.0661795	0.00287336	0.00156397	0.952739
KRT74	5.00947e-68	0	1.36685e-38	0	0.614066	0.103623	0.318295	9.14768e-09	0.0662476	0.00382235	0.00208103	0.952739
FER1L6	1.07762e-67	0	1.39094e-38	0	0.625837	0.108023	0.319019	8.91478e-09	0.0662892	0.00158334	0.000862164	0.952739
C3orf22	3.57311e-68	0	1.18776e-38	0	0.623331	0.104624	0.321516	8.60811e-09	0.0662977	0.0246196	0.0134063	0.952739
MYEOV	3.53915e-68	0	1.29078e-38	0	0.612107	0.10653	0.322464	8.51607e-09	0.0663421	-0.015514	0.00844933	0.952739
STX2	2.54219e-68	0	1.27573e-38	0	0.614938	0.10582	0.323126	9.35815e-09	0.0663479	-0.0112709	0.00613854	0.952739
RAI14	4.39906e-68	0	1.35048e-38	0	0.615014	0.107967	0.32168	1.00944e-08	0.0664361	0.00417798	0.00227623	0.952739
RPS26	3.31047e-68	0	1.28918e-38	0	0.620586	0.105781	0.322765	8.95661e-09	0.0664772	-0.0268004	0.0146035	0.952739
ERCC6	5.59135e-68	0	1.32509e-38	0	0.613868	0.103846	0.32125	1.02084e-08	0.0664782	0.00182898	0.000996612	0.952739
MRPS23	3.05571e-68	0	1.20499e-38	0	0.606935	0.105942	0.321854	8.51768e-09	0.0664905	0.0102807	0.00560221	0.952739
KCNH1	4.38436e-68	0	1.30718e-38	0	0.620344	0.105445	0.323255	8.5867e-09	0.0665724	0.00712265	0.00388248	0.953178
DHRS3	2.60958e-68	0	1.36927e-38	0	0.615759	0.105055	0.318584	9.75459e-09	0.0669349	-0.00442011	0.00241256	0.954152
ZNF439	4.97801e-68	0	1.26466e-38	0	0.626341	0.106278	0.323194	8.42e-09	0.0670118	0.00612896	0.00334622	0.954152
OR5K4	3.98299e-68	0	1.23335e-38	0	0.62216	0.106646	0.320347	9.37388e-09	0.0670891	0.00843768	0.00460801	0.954152
CADM4	2.57542e-68	0	1.27183e-38	0	0.619758	0.104005	0.321864	8.42304e-09	0.0671426	-0.00725014	0.00396024	0.954152
CC2D1B	5.37381e-68	0	1.29139e-38	0	0.615425	0.106752	0.320653	9.80941e-09	0.0671904	0.00309679	0.00169186	0.954152
KRTAP10-12	2.43618e-68	0	1.35018e-38	0	0.609417	0.105694	0.316661	9.88155e-09	0.0672799	-0.0110231	0.00602416	0.954152
HINT1	3.71984e-68	0	1.30479e-38	0	0.617754	0.10323	0.323859	8.33024e-09	0.0673151	0.0144838	0.00791646	0.954152
G6PC2	4.59577e-68	0	1.16701e-38	0	0.616869	0.104451	0.318794	9.29365e-09	0.0673215	0.00242748	0.00132683	0.954152
VIM	3.84205e-68	0	1.11049e-38	0	0.618244	0.107758	0.318662	8.58158e-09	0.0674589	0.00664456	0.00363365	0.954152
ABCC1	2.17004e-68	0	1.31243e-38	0	0.614537	0.10489	0.323956	8.19085e-09	0.06749	-0.00268695	0.00146956	0.954152
ACIN1	2.24755e-68	0	1.29776e-38	0	0.617096	0.105663	0.318687	8.80546e-09	0.0675631	-0.00431478	0.00236048	0.954152
FBXW5	1.94856e-68	0	1.25619e-38	0	0.614509	0.105647	0.322374	9.08551e-09	0.0675638	-0.0024524	0.00134164	0.954152
TAF13	3.73888e-68	0	1.3885e-38	0	0.614514	0.105324	0.321231	9.01395e-09	0.0675662	0.0120059	0.00656814	0.954152
CCDC126	2.80389e-68	0	1.14773e-38	0	0.61391	0.105109	0.322263	8.60191e-09	0.0676341	-0.0269157	0.0147285	0.954152
AP3M1	2.6306e-68	0	1.38833e-38	0	0.611111	0.106313	0.320221	9.04792e-09	0.0677363	-0.00799286	0.0043754	0.954152
RPA1	3.91682e-68	0	1.1619e-38	0	0.616666	0.106858	0.32144	8.12989e-09	0.0677455	0.0052764	0.00288847	0.954152
IL22RA1	4.17919e-68	0	1.28444e-38	0	0.615448	0.105907	0.325064	9.51484e-09	0.0678163	0.00796674	0.00436238	0.954152
PSMG4	2.24389e-68	0	1.23647e-38	0	0.610697	0.105481	0.317651	8.83249e-09	0.0678809	-0.00747823	0.00409584	0.954152
TMEM245	2.63417e-68	0	1.36977e-38	0	0.616671	0.106796	0.322764	9.59461e-09	0.0678891	-0.00471422	0.00258207	0.954152
ACTN1	2.96005e-68	0	1.23051e-38	0	0.626067	0.106532	0.324151	1.01276e-08	0.0678998	-0.00519957	0.00284801	0.954152
MTHFD2	2.51475e-68	0	1.24217e-38	0	0.616846	0.105039	0.31882	9.28199e-09	0.0679514	-0.00760864	0.00416834	0.954152
POU4F3	2.82609e-68	0	1.30219e-38	0	0.612164	0.105456	0.322585	8.46966e-09	0.0679913	-0.00750359	0.00411138	0.954152
GMNC	4.50521e-68	0	1.26351e-38	0	0.62429	0.10473	0.325711	8.49355e-09	0.0681148	0.00616564	0.00337981	0.954152
FAHD2B	4.77624e-68	0	1.3687e-38	0	0.618166	0.104912	0.319759	9.21121e-09	0.068174	0.00549145	0.00301088	0.954152
SLC25A28	2.80606e-68	0	1.3562e-38	0	0.614327	0.104164	0.320555	8.92104e-09	0.0682297	-0.0143735	0.00788235	0.954152
INAFM1	3.19679e-68	0	1.26e-38	0	0.619933	0.106879	0.318808	9.05773e-09	0.0682731	-0.00922347	0.00505891	0.954152
RNF20	2.11972e-68	0	1.17675e-38	0	0.609035	0.106246	0.32232	9.01869e-09	0.0685779	-0.00519145	0.00285056	0.954152
ZNRF2	3.71171e-68	0	1.28423e-38	0	0.617909	0.105463	0.323807	8.96564e-09	0.0685943	0.0154481	0.00848286	0.954152
TBC1D28	3.48314e-68	0	1.20596e-38	0	0.616655	0.105035	0.321731	8.89934e-09	0.0686701	0.00976405	0.0053631	0.954152
C1orf210	4.08839e-68	0	1.44629e-38	0	0.619518	0.10714	0.324906	8.19591e-09	0.0687042	0.0109538	0.00601735	0.954152
VPS13D	7.95385e-68	0	1.34375e-38	0	0.61803	0.106527	0.318583	9.36645e-09	0.0687496	0.00171398	0.000941709	0.954152
SETD1A	2.45881e-68	0	1.35089e-38	0	0.615225	0.107112	0.314386	9.41935e-09	0.068754	-0.00520464	0.00285962	0.954152
KCNK4	4.42222e-68	0	1.25538e-38	0	0.61967	0.105008	0.319647	8.98881e-09	0.0687545	0.00649777	0.00357012	0.954152
SYT3	4.75685e-68	0	1.32172e-38	0	0.621383	0.104077	0.321363	8.51686e-09	0.068833	0.00697448	0.00383313	0.954152
CAPN10	2.15405e-68	0	1.44002e-38	0	0.617421	0.106422	0.323607	1.07792e-08	0.0689729	-0.00297203	0.00163423	0.954152
TCTN2	3.79112e-68	0	1.22338e-38	0	0.615695	0.106806	0.318424	8.61169e-09	0.0690545	0.00738399	0.00406143	0.954152
IER5L	2.73564e-68	0	1.21918e-38	0	0.618908	0.10508	0.323109	9.34861e-09	0.0691202	-0.0125833	0.00692283	0.954152
PRUNE2	1.87771e-68	0	1.26198e-38	0	0.615389	0.106301	0.319925	9.01192e-09	0.0691573	-0.00148216	0.000815538	0.954152
LYPD6	3.69746e-68	0	1.21115e-38	0	0.620197	0.105892	0.322658	8.01373e-09	0.0692659	0.00654196	0.00360102	0.954152
TMEM56-RWDD3	3.84973e-68	0	1.40384e-38	0	0.620445	0.105495	0.321104	9.16166e-09	0.0692942	0.0706984	0.0389199	0.954152
PRRG4	2.77078e-68	0	1.20687e-38	0	0.617793	0.104599	0.3181	8.96749e-09	0.0693076	-0.0130985	0.00721117	0.954152
GUCY2C	3.82058e-68	0	1.2752e-38	0	0.610617	0.106294	0.31652	8.33436e-09	0.0693441	0.00394426	0.00217173	0.954152
CCNI	3.4067e-68	0	1.28143e-38	0	0.614934	0.10702	0.325869	8.09141e-09	0.0693855	0.0142007	0.00782011	0.954152
SERBP1	3.60327e-68	0	1.37499e-38	0	0.617144	0.105533	0.320034	9.71848e-09	0.0695223	0.0110902	0.00611024	0.954152
HP	4.81767e-68	0	1.33629e-38	0	0.624388	0.107432	0.322568	1.00035e-08	0.0695401	0.00670098	0.00369219	0.954152
C6orf222	4.57423e-68	0	1.38069e-38	0	0.613725	0.107961	0.321508	8.6695e-09	0.0695978	0.00700637	0.00386125	0.954152
GALE	2.78753e-68	0	1.26278e-38	0	0.617979	0.107361	0.319528	8.63184e-09	0.0696425	-0.00680347	0.00375003	0.954152
DENND2D	2.46716e-68	0	1.26481e-38	0	0.620487	0.102772	0.319942	6.61018e-09	0.0697389	-0.00324695	0.00179032	0.954152
ELOVL3	4.79394e-68	0	1.45962e-38	0	0.615857	0.105581	0.314962	8.8094e-09	0.0698455	0.00515294	0.00284233	0.954152
TMX4	3.74837e-68	0	1.29079e-38	0	0.614871	0.107843	0.320834	8.71377e-09	0.0698778	0.0102282	0.00564249	0.954152
AGXT	4.4718e-68	0	1.29141e-38	0	0.616295	0.107199	0.326658	7.82141e-09	0.0700113	0.00420805	0.00232251	0.954152
PM20D2	2.9233e-68	0	1.30161e-38	0	0.617882	0.105792	0.320216	8.94593e-09	0.0700401	-0.00933944	0.00515517	0.954152
ZNF385C	4.6001e-68	0	1.23297e-38	0	0.618081	0.103888	0.320189	9.30274e-09	0.0701909	0.00480099	0.00265147	0.954152
ACADL	2.3738e-68	0	1.32275e-38	0	0.618831	0.106577	0.321519	8.28909e-09	0.0701958	-0.00308144	0.00170184	0.954152
UBA52	3.51545e-68	0	1.29731e-38	0	0.618363	0.106623	0.318182	8.75678e-09	0.0702579	-0.0385303	0.0212844	0.954152
PSG2	3.30869e-68	0	1.2283e-38	0	0.61502	0.105304	0.321553	8.49985e-09	0.0703168	0.0098589	0.00544727	0.954152
PHC1	2.58935e-68	0	1.39495e-38	0	0.617551	0.105446	0.319726	9.50556e-09	0.0703393	-0.00573996	0.00317172	0.954152
SCML2	2.90657e-68	0	1.17507e-38	0	0.616814	0.104778	0.320295	9.09536e-09	0.0703406	-0.0229204	0.0126651	0.954152
ZNF556	2.47996e-68	0	1.21478e-38	0	0.615717	0.106417	0.32356	9.30436e-09	0.0703934	-0.00590343	0.00326267	0.954152
SLC35B4	3.09756e-68	0	1.12401e-38	0	0.610854	0.104586	0.323594	8.33859e-09	0.0704242	0.00712047	0.00393573	0.954152
ANKRD30B	2.94065e-68	0	1.29002e-38	0	0.616149	0.106567	0.323911	8.83893e-09	0.0707335	0.00550722	0.00304738	0.954152
GOLGA6L6	3.22004e-68	0	1.34055e-38	0	0.621066	0.106218	0.321608	8.91581e-09	0.0708155	-0.0133191	0.00737217	0.954152
ARMC1	2.91924e-68	0	1.37473e-38	0	0.614083	0.105722	0.321963	8.51456e-09	0.0708539	-0.00696611	0.00385629	0.954152
POM121L12	2.59723e-68	0	1.24758e-38	0	0.611581	0.106337	0.322751	8.40571e-09	0.0708952	-0.00775717	0.00429484	0.954152
AAAS	4.21856e-68	0	1.17752e-38	0	0.619261	0.104262	0.320576	8.32852e-09	0.0709061	0.00459334	0.00254325	0.954152
ATP23	4.69781e-68	0	1.33706e-38	0	0.614844	0.10601	0.322306	8.2223e-09	0.0710854	0.00323709	0.00179345	0.954152
GPR141	2.92752e-68	0	1.28487e-38	0	0.616311	0.10633	0.320712	9.30592e-09	0.0712446	-0.00891451	0.00494172	0.954152
ARHGEF2	2.75275e-68	0	1.4051e-38	0	0.616467	0.105397	0.316769	8.95405e-09	0.0712534	-0.00559578	0.00310209	0.954152
SAP18	2.61199e-68	0	1.27539e-38	0	0.608504	0.106217	0.319784	8.67132e-09	0.0712698	-0.0149677	0.008298	0.954152
GLDC	5.56049e-68	0	1.33117e-38	0	0.609465	0.10482	0.321622	8.21531e-09	0.0713051	0.00193248	0.00107149	0.954152
OR10A7	3.8312e-68	0	1.17374e-38	0	0.618504	0.104961	0.320771	8.09648e-09	0.0713651	0.0131359	0.00728491	0.954152
C2orf42	2.51089e-68	0	1.29236e-38	0	0.613541	0.106213	0.325266	9.32239e-09	0.071419	-0.0056305	0.00312317	0.954152
ZNF22	3.88698e-68	0	1.3022e-38	0	0.620372	0.106432	0.321536	8.52576e-09	0.0714506	0.0125863	0.00698226	0.954152
STARD5	5.35775e-68	0	1.2939e-38	0	0.623723	0.106359	0.323445	8.15091e-09	0.071457	0.00670105	0.00371749	0.954152
C11orf58	3.47181e-68	0	1.3508e-38	0	0.613672	0.10632	0.324311	8.40572e-09	0.0714661	0.0207835	0.0115303	0.954152
ISCA1	3.38015e-68	0	1.17371e-38	0	0.618265	0.105706	0.322717	9.02097e-09	0.0714855	0.0198309	0.0110025	0.954152
SLC25A31	3.82077e-68	0	1.38121e-38	0	0.612661	0.105496	0.323575	8.49892e-09	0.0715015	0.00627081	0.00347935	0.954152
SLC6A3	2.92537e-68	0	1.30089e-38	0	0.621681	0.10642	0.324218	9.89746e-09	0.0715414	-0.00705921	0.00391734	0.954152
SPSB1	3.19324e-68	0	1.37478e-38	0	0.618415	0.104083	0.324952	8.51526e-09	0.0715606	-0.0129598	0.00719225	0.954152
SLC15A4	5.6586e-68	0	1.4124e-38	0	0.62214	0.105709	0.316924	8.83391e-09	0.0715678	0.00560253	0.00310929	0.954152
ST7	2.80042e-68	0	1.15823e-38	0	0.614462	0.108356	0.321923	8.96165e-09	0.0716032	-0.00850637	0.00472144	0.954152
NR3C2	2.459e-68	0	1.26222e-38	0	0.613916	0.105747	0.323595	8.15997e-09	0.0716985	-0.00384402	0.00213433	0.954152
SLC13A2	3.86368e-68	0	1.19538e-38	0	0.612583	0.104655	0.32292	1.09159e-08	0.0717102	0.00329743	0.00183092	0.954152
HPN	3.53621e-68	0	1.17069e-38	0	0.615804	0.104597	0.32272	9.07869e-09	0.0717558	0.00898846	0.00499171	0.954152
GALNT17	2.59626e-68	0	1.3561e-38	0	0.618132	0.106073	0.322462	9.68849e-09	0.0719761	-0.00528776	0.00293882	0.954152
RNF175	2.59793e-68	0	1.21975e-38	0	0.618318	0.108353	0.324823	9.52044e-09	0.0720077	-0.00321958	0.00178957	0.954152
WBP2	4.05037e-68	0	1.34071e-38	0	0.619361	0.105468	0.319269	9.01569e-09	0.0720372	0.00949716	0.00527944	0.954152
TRAF5	3.9828e-68	0	1.33223e-38	0	0.61396	0.104738	0.32539	8.60822e-09	0.0720674	0.00776259	0.00431566	0.954152
KCNC2	2.48633e-68	0	1.25853e-38	0	0.618479	0.104723	0.322163	9.20847e-09	0.0721054	-0.00811219	0.00451062	0.954152
DPH2	3.67507e-68	0	1.24237e-38	0	0.612229	0.107363	0.322625	8.61481e-09	0.0722495	0.00663106	0.00368893	0.954152
MPG	4.1157e-68	0	1.36258e-38	0	0.613295	0.10377	0.320692	8.25146e-09	0.0722761	0.00424648	0.00236258	0.954152
CFAP97	4.39454e-68	0	1.46415e-38	0	0.615373	0.103694	0.323614	9.23639e-09	0.0723391	0.00456764	0.00254182	0.954152
DNASE1L3	2.5587e-68	0	1.24834e-38	0	0.612692	0.105596	0.3258	9.07446e-09	0.0723859	-0.00668691	0.00372178	0.954152
YJEFN3	2.1359e-68	0	1.22613e-38	0	0.615309	0.106042	0.322593	8.67121e-09	0.0725575	-0.00333738	0.00185863	0.954152
2008-03-01	2.52234e-68	0	1.2726e-38	0	0.614763	0.105829	0.321095	8.85826e-09	0.0725676	-0.00607389	0.00338274	0.954152
EMILIN1	4.68617e-68	0	1.34654e-38	0	0.61951	0.104514	0.318607	9.18262e-09	0.0726396	0.00488817	0.00272306	0.954152
ECM1	2.13632e-68	0	1.25127e-38	0	0.613982	0.106101	0.322009	9.43494e-09	0.0726616	-0.00284591	0.0015855	0.954152
CARMIL3	5.05549e-68	0	1.19444e-38	0	0.612911	0.106645	0.321623	8.01908e-09	0.07267	0.00284414	0.00158456	0.954152
COMMD2	2.61348e-68	0	1.28621e-38	0	0.617199	0.106401	0.320644	8.84846e-09	0.07268	-0.00433489	0.00241519	0.954152
KIF13A	1.77984e-68	0	1.26842e-38	0	0.615764	0.105293	0.319273	1.0458e-08	0.0726883	-0.00214755	0.00119654	0.954152
AAMP	3.62096e-68	0	1.23175e-38	0	0.614458	0.105846	0.322505	8.24669e-09	0.0728006	0.00730832	0.00407355	0.954152
PIGG	2.47258e-68	0	1.21655e-38	0	0.613899	0.105837	0.322614	8.79691e-09	0.0728579	-0.00301666	0.00168178	0.954152
FAM107B	3.17832e-68	0	1.25799e-38	0	0.618601	0.106896	0.32056	8.48993e-09	0.0730364	-0.00730763	0.00407652	0.954152
IRF8	2.38433e-68	0	1.29273e-38	0	0.617621	0.105664	0.317606	9.54468e-09	0.0730385	-0.00467778	0.00260949	0.954152
USP31	2.19214e-68	0	1.32656e-38	0	0.618971	0.104937	0.321027	8.33319e-09	0.0730812	-0.00353832	0.00197414	0.954152
SLITRK3	3.35071e-68	0	1.33688e-38	0	0.621643	0.106063	0.319688	9.55513e-09	0.0732283	-0.00433704	0.00242101	0.954152
CCDC177	2.48525e-68	0	1.23027e-38	0	0.625663	0.106017	0.320645	9.93583e-09	0.0732547	-0.00432123	0.0024124	0.954152
GPR20	2.45872e-68	0	1.38049e-38	0	0.61758	0.105341	0.326521	8.18726e-09	0.0732552	-0.00501811	0.00280146	0.954152
ZMYND11	3.98043e-68	0	1.27072e-38	0	0.62238	0.105236	0.319578	9.06288e-09	0.0733433	0.0108218	0.00604331	0.954152
FGFBP2	2.83506e-68	0	1.23047e-38	0	0.61842	0.105392	0.32362	8.95386e-09	0.0733618	-0.0161952	0.00904462	0.954152
NAMPT	3.911e-68	0	1.39261e-38	0	0.617929	0.105395	0.318994	8.68701e-09	0.0733768	0.0166	0.00927117	0.954152
TBX2	5.45642e-68	0	1.33353e-38	0	0.617799	0.10701	0.32335	9.30382e-09	0.0734221	0.0035804	0.00199999	0.954152
AZU1	2.40033e-68	0	1.24681e-38	0	0.614057	0.10599	0.322781	9.17417e-09	0.073453	-0.00707189	0.00395073	0.954152
PTPN3	4.2696e-68	0	1.34824e-38	0	0.610075	0.10599	0.323128	8.43195e-09	0.0735327	0.00391505	0.00218776	0.954152
EFNA1	4.26527e-68	0	1.4749e-38	0	0.612709	0.106441	0.317663	9.23475e-09	0.0735648	0.0100088	0.00559363	0.954152
OR4K14	3.24311e-68	0	1.43024e-38	0	0.616242	0.105644	0.322239	8.81894e-09	0.0735696	-0.0119716	0.00669071	0.954152
IMPACT	4.39357e-68	0	1.36388e-38	0	0.61811	0.105965	0.321392	8.38804e-09	0.0735741	0.00630256	0.00352243	0.954152
FBXO6	2.98885e-68	0	1.29026e-38	0	0.619698	0.105733	0.32181	9.58334e-09	0.0737282	-0.00550091	0.00307604	0.954152
NFATC4	2.0908e-68	0	1.2978e-38	0	0.614877	0.104679	0.317521	8.9025e-09	0.0737362	-0.0029667	0.00165899	0.954152
HSCB	2.48464e-68	0	1.19674e-38	0	0.616808	0.105432	0.317531	8.79777e-09	0.0738234	-0.00573946	0.00321049	0.954152
CRTC1	4.28341e-68	0	1.47275e-38	0	0.618245	0.104471	0.322606	8.88353e-09	0.0739066	0.0078676	0.00440218	0.954152
HMGCS2	3.86795e-68	0	1.17641e-38	0	0.619489	0.105573	0.320305	8.67029e-09	0.0739435	0.00544331	0.0030461	0.954152
METTL14	2.86587e-68	0	1.21766e-38	0	0.620627	0.105835	0.320449	9.03496e-09	0.0739519	-0.00872936	0.00488513	0.954152
CYB5R3	2.09455e-68	0	1.14041e-38	0	0.610766	0.107938	0.32287	9.56982e-09	0.0740543	-0.00368331	0.00206199	0.954152
ANKRD36	3.98478e-68	0	1.26982e-38	0	0.619285	0.105358	0.321733	7.98975e-09	0.0740642	0.00485059	0.00271555	0.954152
HPS1	2.36686e-68	0	1.15922e-38	0	0.618958	0.106791	0.322807	8.86119e-09	0.0740866	-0.00344958	0.00193136	0.954152
FAXC	2.37643e-68	0	1.24618e-38	0	0.616802	0.104078	0.322485	9.55982e-09	0.0741437	-0.00516032	0.00288974	0.954152
VWC2	3.92459e-68	0	1.26257e-38	0	0.614165	0.106265	0.321774	8.48885e-09	0.074155	0.0104077	0.00582844	0.954152
CEP44	2.55146e-68	0	1.39149e-38	0	0.611087	0.104687	0.324886	8.39574e-09	0.0742041	-0.0037707	0.00211201	0.954152
NTAN1	2.95115e-68	0	1.40513e-38	0	0.619448	0.104569	0.321453	9.24337e-09	0.0742117	-0.00538644	0.00301707	0.954152
CYP26C1	4.66751e-68	0	1.36452e-38	0	0.615542	0.105598	0.318734	8.77556e-09	0.0742512	0.00402978	0.00225749	0.954152
TMEM242	3.15566e-68	0	1.13409e-38	0	0.615755	0.104329	0.325201	9.51106e-09	0.0742964	-0.0109825	0.00615337	0.954152
ARMC6	4.03254e-68	0	1.18428e-38	0	0.619218	0.106096	0.323146	1.05635e-08	0.0743674	0.00651196	0.00364946	0.954152
KNOP1	2.48513e-68	0	1.24739e-38	0	0.614332	0.105185	0.318909	8.88951e-09	0.0744155	-0.00603235	0.00338124	0.954152
PRKAA1	4.02077e-68	0	1.2594e-38	0	0.620078	0.106061	0.320771	9.48099e-09	0.0744233	0.00813853	0.00456191	0.954152
TXNDC11	4.67127e-68	0	1.33355e-38	0	0.611107	0.106082	0.319825	8.01977e-09	0.0744482	0.00330109	0.00185053	0.954152
IL1RL2	2.47467e-68	0	1.24079e-38	0	0.613746	0.105252	0.317269	9.24268e-09	0.0744981	-0.00648229	0.00363448	0.954152
HCN2	2.27183e-68	0	1.34588e-38	0	0.614672	0.105961	0.322345	8.43701e-09	0.0745005	-0.00554045	0.00310644	0.954152
TMEM57	4.09096e-68	0	1.38715e-38	0	0.615558	0.107097	0.324356	8.88058e-09	0.0745298	0.0117365	0.00658111	0.954152
FLT4	2.10971e-68	0	1.25214e-38	0	0.617673	0.106337	0.321075	8.93768e-09	0.0745738	-0.00367041	0.00205846	0.954152
PPM1E	2.28985e-68	0	1.16868e-38	0	0.61629	0.106685	0.32523	9.32881e-09	0.0745938	-0.00743161	0.00416812	0.954152
SLC30A4	3.64765e-68	0	1.27796e-38	0	0.616391	0.105752	0.324669	8.875e-09	0.0747445	0.0103086	0.00578469	0.954152
RRAS	2.40681e-68	0	1.35114e-38	0	0.61867	0.107326	0.321174	1.00445e-08	0.0747771	-0.00414726	0.00232751	0.954152
CCDC80	2.35714e-68	0	1.24979e-38	0	0.614794	0.104969	0.322423	9.46951e-09	0.0748111	-0.00385695	0.00216484	0.954152
NDUFS3	2.69152e-68	0	1.21552e-38	0	0.617322	0.105468	0.324473	8.73443e-09	0.0748129	-0.00842542	0.00472907	0.954152
PARP14	4.38115e-68	0	1.36868e-38	0	0.615105	0.105085	0.325467	7.78192e-09	0.0748719	0.00443031	0.00248717	0.954152
XKR9	2.56748e-68	0	1.35839e-38	0	0.612753	0.104334	0.320304	9.60812e-09	0.0748865	-0.00378936	0.00212745	0.954152
PRCD	3.84586e-68	0	1.32271e-38	0	0.61852	0.104845	0.32026	8.65182e-09	0.0748865	0.0116141	0.0065205	0.954152
F5	2.38352e-68	0	1.36321e-38	0	0.615997	0.105069	0.323661	8.89349e-09	0.0748889	-0.0034818	0.0019548	0.954152
ZDHHC1	2.90178e-68	0	1.22042e-38	0	0.61631	0.106599	0.322488	9.27778e-09	0.0749943	-0.00676482	0.00379936	0.954152
DNAJC18	4.46922e-68	0	1.40881e-38	0	0.615658	0.106299	0.320091	8.38245e-09	0.0749981	0.00588287	0.00330408	0.954152
PDE2A	4.38786e-68	0	1.3047e-38	0	0.619687	0.106598	0.324607	8.21686e-09	0.075152	0.00665509	0.00373976	0.954152
ZNF417	3.32706e-68	0	1.18186e-38	0	0.622409	0.106598	0.32242	8.18569e-09	0.0751769	-0.00307438	0.00172777	0.954152
RABEPK	2.24866e-68	0	1.19373e-38	0	0.617173	0.1071	0.321774	9.0937e-09	0.075282	-0.00357038	0.00200724	0.954152
KCNA5	4.18397e-68	0	1.29124e-38	0	0.614506	0.105851	0.318537	9.56419e-09	0.0753419	0.00523006	0.0029409	0.954152
SFTPB	2.82915e-68	0	1.23925e-38	0	0.617658	0.105757	0.32121	9.1559e-09	0.0753671	-0.00846277	0.00475908	0.954152
POLR2H	4.29593e-68	0	1.23549e-38	0	0.614524	0.105281	0.321261	8.40427e-09	0.0754216	0.0138047	0.00776459	0.954152
KCNRG	3.33203e-68	0	1.18212e-38	0	0.610179	0.104906	0.321114	8.98955e-09	0.075445	0.00653562	0.00367632	0.954152
LPAR4	5.03158e-68	0	1.22014e-38	0	0.614	0.106582	0.320081	8.4563e-09	0.0754495	0.0122349	0.0068823	0.954152
MMP26	3.03278e-68	0	1.33006e-38	0	0.617114	0.105719	0.323661	8.76346e-09	0.0755267	-0.00777702	0.00437584	0.954152
COX18	2.53444e-68	0	1.15591e-38	0	0.618316	0.107274	0.31897	9.27376e-09	0.0755346	-0.00542327	0.00305155	0.954152
CEP152	2.11827e-68	0	1.19615e-38	0	0.615348	0.105053	0.32244	8.74252e-09	0.0755974	-0.0028857	0.00162407	0.954152
SCUBE2	5.21302e-68	0	1.3055e-38	0	0.618447	0.106039	0.319818	9.0414e-09	0.0757082	0.00251153	0.00141402	0.954152
SPRED3	3.85384e-68	0	1.22926e-38	0	0.617671	0.104687	0.322047	9.21467e-09	0.0758741	0.00689801	0.00388586	0.954152
PYROXD2	4.70253e-68	0	1.35081e-38	0	0.618976	0.105333	0.320599	7.75762e-09	0.0758936	0.00423513	0.00238594	0.954152
TSPEAR	2.42357e-68	0	1.44094e-38	0	0.618541	0.107942	0.319663	8.17155e-09	0.075921	-0.00231157	0.00130239	0.954152
MYH13	6.91166e-68	0	1.39412e-38	0	0.614953	0.105567	0.321459	9.61723e-09	0.0759436	0.0020479	0.00115392	0.954152
RNASE12	2.96627e-68	0	1.25529e-38	0	0.619929	0.106941	0.321704	9.38025e-09	0.0759836	-0.0087084	0.00490754	0.954152
PYROXD1	4.69481e-68	0	1.31889e-38	0	0.621636	0.105573	0.324152	9.15937e-09	0.0760383	0.00693387	0.00390825	0.954152
FAM49A	2.86065e-68	0	1.27114e-38	0	0.616852	0.105132	0.317912	9.37216e-09	0.0760703	-0.00932259	0.00525522	0.954152
LDHAL6A	4.3404e-68	0	1.2723e-38	0	0.621183	0.10505	0.317842	8.46255e-09	0.0760741	0.00544246	0.003068	0.954152
OR2V1	3.69312e-68	0	1.33172e-38	0	0.617869	0.105695	0.319363	8.61145e-09	0.0760863	0.0163883	0.00923874	0.954152
KRTAP4-2	3.42743e-68	0	1.23512e-38	0	0.617968	0.103509	0.322601	8.68424e-09	0.0761838	0.0154035	0.00868645	0.954152
OR4C11	4.07805e-68	0	1.34128e-38	0	0.620528	0.104916	0.319828	8.97472e-09	0.0762026	0.0147562	0.00832191	0.954152
PCK2	2.07197e-68	0	1.21106e-38	0	0.615828	0.104653	0.322626	9.37259e-09	0.0762494	-0.00232065	0.00130897	0.954152
LENG8	5.37298e-68	0	1.34195e-38	0	0.618601	0.106851	0.325549	8.21421e-09	0.076341	0.00366892	0.0020701	0.954152
PPFIA3	3.82078e-68	0	1.08877e-38	0	0.615348	0.106711	0.324856	9.16198e-09	0.0763763	0.0061674	0.00348023	0.954152
KLHDC7A	2.30518e-68	0	1.20467e-38	0	0.612808	0.106859	0.319889	9.69318e-09	0.0764891	-0.00455535	0.00257155	0.954152
SEC24B	2.7695e-68	0	1.27411e-38	0	0.618519	0.106478	0.323257	9.34843e-09	0.0765481	-0.00426255	0.00240674	0.954152
SCUBE1	5.48463e-68	0	1.35899e-38	0	0.618357	0.105994	0.323886	8.28095e-09	0.0765521	0.0028002	0.00158108	0.954152
XIRP2	2.15337e-68	0	1.38122e-38	0	0.614551	0.104879	0.317617	9.70485e-09	0.0765916	-0.00204472	0.00115467	0.954152
PDCD4	2.16501e-68	0	1.17154e-38	0	0.613685	0.106315	0.322141	9.68085e-09	0.0766052	-0.00445046	0.00251333	0.954152
LRRC28	2.90774e-68	0	1.27596e-38	0	0.621117	0.105809	0.321566	7.62433e-09	0.0766444	-0.00585913	0.00330929	0.954152
ETFB	5.17088e-68	0	1.18579e-38	0	0.620636	0.106489	0.319852	8.84018e-09	0.0766624	0.00435644	0.00246071	0.954152
DHX33	4.09677e-68	0	1.15343e-38	0	0.617461	0.105751	0.323435	8.34295e-09	0.0766772	0.00339541	0.00191797	0.954152
CANX	4.42156e-68	0	1.28945e-38	0	0.619741	0.104043	0.319857	8.95034e-09	0.0766806	0.00736376	0.00415963	0.954152
PDK4	2.54373e-68	0	1.27109e-38	0	0.615512	0.104425	0.322863	1.00099e-08	0.0767031	-0.00675725	0.00381732	0.954152
TMEM69	2.83522e-68	0	1.27966e-38	0	0.61469	0.107522	0.321007	8.88489e-09	0.0767037	-0.0121746	0.0068777	0.954152
HBS1L	4.41138e-68	0	1.26501e-38	0	0.611708	0.105652	0.319351	9.04188e-09	0.0767038	0.00493909	0.00279021	0.954152
SLC23A1	4.45997e-68	0	1.37096e-38	0	0.621056	0.106162	0.320768	8.37028e-09	0.0767326	0.00708701	0.00400401	0.954152
TMEM165	3.25681e-68	0	1.22382e-38	0	0.62263	0.105549	0.324547	9.41141e-09	0.0767396	-0.012406	0.00700931	0.954152
CYB5R2	3.69775e-68	0	1.36157e-38	0	0.616718	0.103957	0.321865	1.0112e-08	0.0767841	0.00921744	0.00520856	0.954152
C6orf163	3.70655e-68	0	1.42199e-38	0	0.614489	0.105814	0.320891	8.93024e-09	0.0768055	0.00927193	0.00523973	0.954152
FAM219A	3.38473e-68	0	1.35468e-38	0	0.610581	0.107178	0.320686	8.55238e-09	0.0768142	0.0158671	0.00896704	0.954152
DHX35	4.61881e-68	0	1.12426e-38	0	0.614427	0.10572	0.315671	7.98723e-09	0.076833	0.00273924	0.00154814	0.954152
KCTD20	4.19538e-68	0	1.30199e-38	0	0.62042	0.104619	0.320901	8.15976e-09	0.0768848	0.00565616	0.00319726	0.954152
KRTAP16-1	3.65042e-68	0	1.17706e-38	0	0.61684	0.104692	0.32047	8.61395e-09	0.0769669	0.00792318	0.00447998	0.954152
FUNDC1	3.5865e-68	0	1.24416e-38	0	0.618157	0.107475	0.320313	9.63615e-09	0.0770407	0.0231777	0.0131086	0.954152
FASTKD5	2.92909e-68	0	1.24e-38	0	0.619959	0.105863	0.323759	9.83948e-09	0.0770501	-0.00446934	0.0025278	0.954152
MRPS17	3.97215e-68	0	1.36741e-38	0	0.622493	0.106275	0.32299	9.06982e-09	0.0771083	0.0157893	0.00893199	0.954152
ACP1	3.82069e-68	0	1.41117e-38	0	0.614085	0.105921	0.323672	8.38664e-09	0.07719	0.00783527	0.00443362	0.954152
PDCD6IP	4.29584e-68	0	1.24633e-38	0	0.621818	0.103556	0.322606	8.8633e-09	0.0771958	0.00645277	0.0036514	0.954152
GJA1	3.91375e-68	0	1.2053e-38	0	0.623252	0.104784	0.319953	8.61128e-09	0.077233	0.0162308	0.00918558	0.954152
ATP5C1	3.75728e-68	0	1.42654e-38	0	0.616256	0.105816	0.322638	9.79489e-09	0.0772666	0.0120304	0.00680918	0.954152
MSMO1	3.22722e-68	0	1.14898e-38	0	0.615348	0.104793	0.321373	8.76089e-09	0.077301	0.0102049	0.00577667	0.954152
ISX	3.1862e-68	0	1.28668e-38	0	0.61718	0.10565	0.319203	9.59532e-09	0.0774629	-0.00643121	0.00364248	0.954152
KIAA2026	5.54764e-68	0	1.38217e-38	0	0.623335	0.104417	0.316094	9.09734e-09	0.0776189	0.00316687	0.00179458	0.954152
C12orf75	3.59711e-68	0	1.20249e-38	0	0.621329	0.105138	0.322659	8.88424e-09	0.0776258	0.0270304	0.0153178	0.954152
GCSAML	2.45736e-68	0	1.17162e-38	0	0.618774	0.107184	0.325662	8.75204e-09	0.0776523	-0.00964118	0.00546401	0.954152
NCKAP1L	4.47417e-68	0	1.19703e-38	0	0.618244	0.106057	0.325445	9.64565e-09	0.0777821	0.00336051	0.00190536	0.954152
BBX	2.36886e-68	0	1.27259e-38	0	0.618517	0.104127	0.318742	9.5841e-09	0.0778186	-0.00313572	0.00177812	0.954152
ADCY6	2.39571e-68	0	1.25703e-38	0	0.618736	0.103389	0.321652	7.41759e-09	0.0780143	-0.00241225	0.00136878	0.954152
HEXB	3.00586e-68	0	1.30846e-38	0	0.61921	0.106884	0.326578	9.04854e-09	0.0780783	-0.00542979	0.00308168	0.954152
CACNB3	3.15276e-68	0	1.30388e-38	0	0.62467	0.106338	0.324048	8.72689e-09	0.0781059	-0.00535342	0.00303861	0.954152
EIF5A	3.39614e-68	0	1.17558e-38	0	0.613812	0.106155	0.320127	8.74008e-09	0.0781242	0.0348201	0.0197652	0.954152
WBP11	5.85061e-68	0	1.2963e-38	0	0.620027	0.104544	0.325283	7.94469e-09	0.0782472	0.00425559	0.00241663	0.954152
WFDC12	3.96896e-68	0	1.25401e-38	0	0.623876	0.107227	0.321435	9.06994e-09	0.0782791	0.0339107	0.019259	0.954152
PRPF39	3.31484e-68	0	1.20575e-38	0	0.61585	0.106259	0.32179	8.69516e-09	0.0782984	0.00806048	0.00457811	0.954152
WDR12	4.11942e-68	0	1.22976e-38	0	0.61557	0.106236	0.322411	8.65871e-09	0.0783085	0.00519095	0.0029484	0.954152
TRIM31	4.77518e-68	0	1.36903e-38	0	0.617648	0.104303	0.322195	7.81449e-09	0.0783441	0.00260912	0.00148212	0.954152
SDCBP2	2.23197e-68	0	1.28149e-38	0	0.61081	0.10614	0.321868	8.62465e-09	0.0783931	-0.00203482	0.00115608	0.954152
SIN3B	4.59115e-68	0	1.41214e-38	0	0.614418	0.105239	0.324606	7.89812e-09	0.0784117	0.00443331	0.00251894	0.954152
SYVN1	3.97771e-68	0	1.29619e-38	0	0.61776	0.105441	0.319288	8.78088e-09	0.0784588	0.00731796	0.00415861	0.954152
ADAMTSL3	2.09112e-68	0	1.25516e-38	0	0.616468	0.105313	0.322461	9.92277e-09	0.0785197	-0.00276768	0.00157312	0.954152
RGS8	4.02603e-68	0	1.35138e-38	0	0.617048	0.10596	0.322251	8.89659e-09	0.0785221	0.0109041	0.00619782	0.954152
RAB5C	2.2829e-68	0	1.14083e-38	0	0.61054	0.105347	0.318192	9.61229e-09	0.0785601	-0.00657148	0.00373568	0.954152
C17orf49	2.23085e-68	0	1.12556e-38	0	0.618027	0.104181	0.319373	9.36127e-09	0.0785864	-0.00732909	0.00416672	0.954152
TIE1	2.45598e-68	0	1.30291e-38	0	0.617835	0.105111	0.323481	8.69409e-09	0.0786829	-0.00318656	0.0018122	0.954152
RP1	2.9174e-68	0	1.27763e-38	0	0.622345	0.106014	0.322499	9.01623e-09	0.0787118	-0.00420738	0.00239297	0.954152
KRTAP5-8	2.92363e-68	0	1.32719e-38	0	0.617099	0.107587	0.325002	8.14036e-09	0.0789008	0.0132567	0.00754459	0.954152
ADGRG2	4.32138e-68	0	1.30083e-38	0	0.615964	0.106695	0.316642	9.25457e-09	0.0789753	0.0101542	0.00578036	0.954152
ACER1	3.87682e-68	0	1.29985e-38	0	0.617436	0.106528	0.320494	8.73655e-09	0.0790221	0.00565424	0.00321922	0.954152
NOA1	2.48674e-68	0	1.21206e-38	0	0.618108	0.104643	0.326928	8.34365e-09	0.0790361	-0.00313938	0.00178748	0.954152
PPIE	2.79846e-68	0	1.26934e-38	0	0.618798	0.107562	0.325446	9.38614e-09	0.0790791	-0.00710219	0.00404437	0.954152
CARD9	2.6656e-68	0	1.23914e-38	0	0.617887	0.104912	0.322301	8.61544e-09	0.0791593	-0.00707751	0.0040314	0.954152
ASS1	4.33583e-68	0	1.2563e-38	0	0.614556	0.106871	0.320958	8.59051e-09	0.0791814	0.00540725	0.00308023	0.954152
BPNT1	4.41631e-68	0	1.25713e-38	0	0.616689	0.105072	0.320042	8.97728e-09	0.0792094	0.00383973	0.0021875	0.954152
HRASLS	2.67524e-68	0	1.17701e-38	0	0.615614	0.106099	0.321404	9.31455e-09	0.0792447	-0.0088419	0.00503784	0.954152
CTRC	2.38412e-68	0	1.19297e-38	0	0.619402	0.105499	0.319939	1.02823e-08	0.0792956	-0.00366042	0.00208595	0.954152
ZNF783	2.74523e-68	0	1.30698e-38	0	0.616808	0.106334	0.320771	8.55117e-09	0.0793971	-0.00522332	0.0029776	0.954152
CCL1	4.06078e-68	0	1.51332e-38	0	0.617448	0.106479	0.323699	8.70412e-09	0.0794339	0.0347758	0.0198267	0.954152
PCDHGA2	2.8436e-68	0	1.33186e-38	0	0.618803	0.105608	0.320699	9.16036e-09	0.079454	-0.00547756	0.00312312	0.954152
LMBR1	4.21886e-68	0	1.26091e-38	0	0.617002	0.10656	0.320093	9.59517e-09	0.0796793	0.00635504	0.00362614	0.954152
OR1N2	3.26591e-68	0	1.22803e-38	0	0.619242	0.10689	0.32214	9.18373e-09	0.079804	-0.0120229	0.00686304	0.954152
PLEKHJ1	3.8407e-68	0	1.21829e-38	0	0.619443	0.106011	0.319628	9.29113e-09	0.0799098	0.00771375	0.00440478	0.954152
FAP	4.94487e-68	0	1.3897e-38	0	0.614526	0.106694	0.319854	8.32303e-09	0.0799462	0.00534079	0.00305012	0.954152
GTF3C4	2.26425e-68	0	1.29526e-38	0	0.614537	0.105565	0.323947	7.91039e-09	0.0799981	-0.00581172	0.00331964	0.954152
KIAA0513	2.65013e-68	0	1.49839e-38	0	0.613774	0.10606	0.32097	9.2745e-09	0.0800648	-0.00444006	0.00253671	0.954152
NOP10	3.75242e-68	0	1.37496e-38	0	0.616437	0.105987	0.322443	8.88779e-09	0.0804383	0.0223565	0.0127886	0.954152
HERC1	7.06654e-68	0	1.31167e-38	0	0.617183	0.10638	0.320211	8.96145e-09	0.0804512	0.00225922	0.0012924	0.954152
WLS	4.19682e-68	0	1.42082e-38	0	0.61503	0.104348	0.319843	8.87871e-09	0.0804525	0.00560927	0.00320882	0.954152
CTHRC1	3.72001e-68	0	1.13594e-38	0	0.61801	0.104479	0.32199	9.18131e-09	0.080475	0.00838847	0.00479903	0.954152
CTTNBP2	2.12461e-68	0	1.44069e-38	0	0.609735	0.105476	0.323652	9.06279e-09	0.0804878	-0.00249934	0.00142993	0.954152
PPP1R36	2.35587e-68	0	1.33799e-38	0	0.608544	0.106858	0.318874	9.56286e-09	0.080494	-0.00497804	0.00284811	0.954152
OBP2B	3.23985e-68	0	1.35509e-38	0	0.611375	0.104375	0.320181	9.14896e-09	0.0805297	0.0166758	0.00954194	0.954152
CCNC	3.62792e-68	0	1.28769e-38	0	0.623682	0.105847	0.325519	8.94953e-09	0.0805949	-0.0179859	0.0102938	0.954152
C11orf21	2.89852e-68	0	1.39382e-38	0	0.611925	0.104028	0.323584	9.4392e-09	0.0806873	-0.0162409	0.0092979	0.954152
PEAR1	4.73068e-68	0	1.20877e-38	0	0.615986	0.106605	0.319401	8.64079e-09	0.0807072	0.00349648	0.00200187	0.954152
NREP	3.9153e-68	0	1.07851e-38	0	0.615731	0.106506	0.318902	8.00046e-09	0.0807629	0.00868958	0.00497603	0.954152
ENOX1	2.60761e-68	0	1.22429e-38	0	0.614442	0.105405	0.326317	9.11368e-09	0.0807821	-0.0053644	0.00307208	0.954152
CSRP2	2.87054e-68	0	1.22268e-38	0	0.612385	0.10569	0.321321	8.87152e-09	0.0807851	-0.0166156	0.0095155	0.954152
MYBL1	2.47355e-68	0	1.39331e-38	0	0.612791	0.105942	0.321876	8.94178e-09	0.0808291	-0.00449383	0.00257392	0.954152
DDHD2	4.42033e-68	0	1.16275e-38	0	0.619859	0.106412	0.320178	8.29302e-09	0.0808308	0.00397176	0.00227491	0.954152
NCAPD2	2.00146e-68	0	1.14743e-38	0	0.613377	0.10535	0.323437	8.80788e-09	0.0808551	-0.00283786	0.00162557	0.954152
GP5	2.5312e-68	0	1.28648e-38	0	0.613689	0.106633	0.319541	9.27461e-09	0.0809567	-0.00683531	0.00391669	0.954152
DEF6	4.552e-68	0	1.28689e-38	0	0.614361	0.104764	0.319228	8.69199e-09	0.0810342	0.00451945	0.00259034	0.954152
C12orf57	4.22236e-68	0	1.33392e-38	0	0.617858	0.106239	0.320607	9.88016e-09	0.0810514	0.00670225	0.00384165	0.954152
PAXIP1	2.44067e-68	0	1.44326e-38	0	0.618081	0.106363	0.321736	1.06411e-08	0.0812298	-0.00414888	0.00237948	0.954152
ABCB9	4.08188e-68	0	1.20549e-38	0	0.616495	0.105139	0.320159	8.36999e-09	0.0812503	0.00411281	0.00235895	0.954152
ANKMY2	3.90838e-68	0	1.29032e-38	0	0.614593	0.107424	0.320417	9.33949e-09	0.081348	0.00668977	0.00383823	0.954152
MPEG1	2.77804e-68	0	1.33685e-38	0	0.620907	0.107207	0.322865	9.27746e-09	0.0814386	-0.00330385	0.00189613	0.954152
HYDIN	7.93009e-68	0	1.22936e-38	0	0.617698	0.105135	0.321244	9.60982e-09	0.0814498	0.00138147	0.00079288	0.954152
TP53I3	4.34093e-68	0	1.38984e-38	0	0.618514	0.106911	0.317727	8.12345e-09	0.0814827	0.0050411	0.00289359	0.954152
UFM1	3.87292e-68	0	1.24006e-38	0	0.621726	0.104907	0.319668	9.67722e-09	0.0815401	0.0137879	0.00791577	0.954152
ARSI	2.59447e-68	0	1.35778e-38	0	0.61469	0.105355	0.320105	9.5515e-09	0.0816612	-0.00433604	0.00249035	0.954152
SCNN1A	2.53274e-68	0	1.29932e-38	0	0.615788	0.107651	0.320981	9.22837e-09	0.0816898	-0.00396872	0.00227959	0.954152
PRDX1	3.80311e-68	0	1.30247e-38	0	0.613225	0.106561	0.321715	8.72106e-09	0.0816933	0.0111222	0.00638854	0.954152
LRRC10B	2.59724e-68	0	1.30729e-38	0	0.616444	0.105239	0.323907	8.36445e-09	0.0817	-0.00525035	0.00301585	0.954152
RERG	4.58341e-68	0	1.46281e-38	0	0.619463	0.104537	0.321251	8.72881e-09	0.0818275	0.00987272	0.00567336	0.954152
CNIH3	2.4277e-68	0	1.09527e-38	0	0.611756	0.104281	0.321483	9.41715e-09	0.0818538	-0.0129175	0.00742366	0.954152
SURF1	4.68792e-68	0	1.49994e-38	0	0.6219	0.103772	0.3216	9.61868e-09	0.0819478	0.00837443	0.00481425	0.954152
COX6C	3.7029e-68	0	1.23811e-38	0	0.619237	0.105862	0.321349	8.90174e-09	0.0819584	-0.0133153	0.00765491	0.954152
LILRB5	3.89491e-68	0	1.27511e-38	0	0.613225	0.105737	0.319607	8.40549e-09	0.0820064	0.00503219	0.00289344	0.954152
HAP1	4.60776e-68	0	1.35776e-38	0	0.615267	0.104591	0.318668	1.09271e-08	0.0820437	0.00334781	0.00192518	0.954152
C17orf99	3.32189e-68	0	1.50642e-38	0	0.613745	0.106475	0.324731	9.07759e-09	0.0820601	0.0168751	0.00970464	0.954152
LYSMD4	3.72288e-68	0	1.29177e-38	0	0.616559	0.105403	0.316162	9.09141e-09	0.0820912	0.00763354	0.0043904	0.954152
WNT11	2.56473e-68	0	1.21829e-38	0	0.611634	0.106178	0.321489	9.16965e-09	0.0821508	-0.00594663	0.00342084	0.954152
SERTAD2	3.13596e-68	0	1.30852e-38	0	0.61689	0.104487	0.322375	8.91638e-09	0.0822169	-0.00983065	0.00565638	0.954152
CMBL	2.68412e-68	0	1.16949e-38	0	0.613563	0.106226	0.320339	9.0647e-09	0.0823029	-0.00858443	0.00494071	0.954152
JMJD6	2.66633e-68	0	1.237e-38	0	0.613682	0.105402	0.319752	8.80362e-09	0.0823688	-0.00945759	0.00544442	0.954152
ATP5G3	2.90159e-68	0	1.23066e-38	0	0.618362	0.105202	0.323973	9.05706e-09	0.0823701	-0.0149627	0.00861356	0.954152
PPM1K	3.57291e-68	0	1.28153e-38	0	0.61317	0.105903	0.318443	8.26237e-09	0.0823713	0.00977146	0.00562515	0.954152
ZNF778	5.66196e-68	0	1.31322e-38	0	0.616355	0.105599	0.321212	8.94057e-09	0.082447	0.00314498	0.00181092	0.954152
CCDC38	3.70199e-68	0	1.27414e-38	0	0.612856	0.106435	0.318957	9.61528e-09	0.0825268	0.00553615	0.00318862	0.954152
TSPAN3	2.88607e-68	0	1.30714e-38	0	0.619995	0.106132	0.326822	9.31596e-09	0.0827117	-0.00528739	0.00304718	0.954152
TMEM151B	2.65599e-68	0	1.28768e-38	0	0.615698	0.105	0.323616	8.71928e-09	0.0827843	-0.00698386	0.00402582	0.954152
OR6C75	2.95668e-68	0	1.35191e-38	0	0.618247	0.106916	0.32257	8.89602e-09	0.0828538	-0.00978798	0.00564352	0.954152
DNAJC12	2.86053e-68	0	1.21928e-38	0	0.614975	0.106521	0.320711	8.82011e-09	0.082912	-0.00878441	0.00506585	0.954152
NMI	2.97472e-68	0	1.31084e-38	0	0.618278	0.104762	0.319542	9.01093e-09	0.0829122	-0.00472623	0.00272555	0.954152
GPBAR1	4.85671e-68	0	1.3903e-38	0	0.616245	0.105746	0.320265	8.57709e-09	0.0829622	0.0058887	0.00339648	0.954152
TECTA	2.02602e-68	0	1.23276e-38	0	0.615269	0.10581	0.315774	1.05488e-08	0.0830067	-0.00234493	0.00135271	0.954152
SCGB1D2	3.92152e-68	0	1.19013e-38	0	0.620045	0.106592	0.317707	9.49124e-09	0.083017	0.0151088	0.00871599	0.954152
PLA2G7	4.20332e-68	0	1.30586e-38	0	0.619894	0.106642	0.321495	8.50082e-09	0.0830537	0.00441879	0.00254943	0.954152
ESYT3	2.39223e-68	0	1.38964e-38	0	0.615207	0.106821	0.31717	9.03663e-09	0.0832163	-0.00218725	0.0012626	0.954152
PARK7	4.56695e-68	0	1.29049e-38	0	0.616304	0.105627	0.32177	8.36075e-09	0.0832418	0.008904	0.00514031	0.954152
MAMDC2	3.98865e-68	0	1.19671e-38	0	0.616102	0.104487	0.324189	8.60968e-09	0.0832931	0.00333482	0.00192552	0.954152
FAM3C	3.21043e-68	0	1.37774e-38	0	0.618239	0.105242	0.323119	9.1519e-09	0.0833014	-0.0104864	0.00605503	0.954152
2001-09-01	2.33509e-68	0	1.22865e-38	0	0.61319	0.106458	0.320871	9.11194e-09	0.0833148	-0.00256957	0.00148377	0.954152
EPGN	3.20411e-68	0	1.28169e-38	0	0.621993	0.105666	0.323807	8.84629e-09	0.0834903	-0.0127657	0.00737561	0.954152
BAIAP2L1	2.43706e-68	0	1.20052e-38	0	0.619317	0.104186	0.325119	8.87935e-09	0.0835131	-0.00514195	0.00297108	0.954152
EFCAB3	4.47801e-68	0	1.20589e-38	0	0.616936	0.105501	0.322478	9.99522e-09	0.0835278	0.00410749	0.00237347	0.954152
ABL1	6.10323e-68	0	1.26087e-38	0	0.624209	0.105901	0.323675	8.33268e-09	0.0835568	0.00360679	0.00208434	0.954152
HEATR5A	2.51082e-68	0	1.44571e-38	0	0.622577	0.106743	0.321453	8.54818e-09	0.0835882	-0.00190876	0.00110317	0.954152
ADAT2	2.77451e-68	0	1.30094e-38	0	0.618627	0.105122	0.3256	7.8814e-09	0.0835923	-0.00576401	0.00333136	0.954152
AADAC	4.2243e-68	0	1.09734e-38	0	0.614258	0.106471	0.31746	8.6115e-09	0.0837183	0.00772205	0.00446486	0.954152
CXCR2	4.06587e-68	0	1.21095e-38	0	0.612589	0.106867	0.314844	8.606e-09	0.0837444	0.00527847	0.00305224	0.954152
CYP3A7-CYP3A51P	2.8597e-68	0	1.14922e-38	0	0.618981	0.104965	0.325321	8.53178e-09	0.0837963	-0.162258	0.0938406	0.954152
SUMO3	3.19467e-68	0	1.27118e-38	0	0.612553	0.106522	0.321818	8.80607e-09	0.0838135	0.0262973	0.0152097	0.954152
SPATA21	2.94661e-68	0	1.28513e-38	0	0.614734	0.106427	0.321218	9.31088e-09	0.0838162	-0.00783869	0.00453373	0.954152
PHF20	4.34672e-68	0	1.20993e-38	0	0.623298	0.103895	0.322073	8.94823e-09	0.0838177	0.00498131	0.00288109	0.954152
RNF148	4.21772e-68	0	1.32686e-38	0	0.620286	0.105602	0.317152	8.66876e-09	0.0838496	0.0068386	0.00395573	0.954152
CLDN15	3.52457e-68	0	1.34245e-38	0	0.616927	0.105708	0.318779	8.67213e-09	0.0839048	0.0121545	0.00703192	0.954152
MUCL1	3.90457e-68	0	1.44678e-38	0	0.620238	0.104402	0.321339	8.8296e-09	0.0839846	0.0581662	0.0336604	0.954152
PPP2R5C	4.11043e-68	0	1.25907e-38	0	0.615749	0.106117	0.319558	8.46734e-09	0.0840339	0.00715199	0.00413946	0.954152
PPCDC	3.06726e-68	0	1.29896e-38	0	0.617648	0.10636	0.31619	9.3276e-09	0.084109	-0.00783406	0.00453533	0.954152
RINL	2.85913e-68	0	1.34876e-38	0	0.619166	0.104024	0.321683	9.30401e-09	0.08415	-0.0077841	0.00450701	0.954152
ORC4	2.46541e-68	0	1.17218e-38	0	0.621485	0.104463	0.327407	8.68956e-09	0.0842493	-0.00399023	0.00231109	0.954152
PSPC1	3.32901e-68	0	1.26878e-38	0	0.61181	0.106435	0.320696	8.24849e-09	0.0843333	0.0124408	0.00720749	0.954152
JSRP1	4.42394e-68	0	1.30353e-38	0	0.61554	0.106212	0.323445	8.7039e-09	0.0844319	0.00762391	0.00441827	0.954152
FAM221B	3.76041e-68	0	1.20876e-38	0	0.612747	0.105555	0.320535	8.01887e-09	0.0844512	0.00384218	0.00222679	0.954152
DEPDC1B	4.0032e-68	0	1.28925e-38	0	0.612686	0.106	0.321417	8.11338e-09	0.0844573	0.00574831	0.00333158	0.954152
KRTAP5-9	4.70141e-68	0	1.21283e-38	0	0.615134	0.1052	0.320637	8.14371e-09	0.0844579	0.0058587	0.00339556	0.954152
SLC25A27	2.99826e-68	0	1.27885e-38	0	0.618215	0.106993	0.321967	9.32025e-09	0.0845987	-0.00674768	0.00391257	0.954152
HIGD1B	3.91184e-68	0	1.28368e-38	0	0.617707	0.106794	0.32188	8.74158e-09	0.0846244	0.016672	0.00966788	0.954152
BCAR3	2.37058e-68	0	1.40978e-38	0	0.623661	0.106794	0.318738	9.187e-09	0.0847673	-0.00185395	0.00107558	0.954152
HS6ST3	2.56843e-68	0	1.46193e-38	0	0.617026	0.10702	0.323033	9.764e-09	0.0847786	-0.0048093	0.00279023	0.954152
PLOD1	2.24766e-68	0	1.33804e-38	0	0.616192	0.105863	0.319422	9.48876e-09	0.0849801	-0.00278844	0.00161883	0.954152
WSB2	5.5084e-68	0	1.43214e-38	0	0.615606	0.105029	0.324278	8.20043e-09	0.0850062	0.00626053	0.00363485	0.954152
MRAS	3.3456e-68	0	1.17405e-38	0	0.616012	0.106628	0.323649	9.03639e-09	0.0850398	0.0146766	0.00852214	0.954152
ZFAND1	3.43043e-68	0	1.17046e-38	0	0.614581	0.106044	0.322658	9.35781e-09	0.0850753	0.00732687	0.00425491	0.954152
ZAP70	3.95533e-68	0	1.23575e-38	0	0.619721	0.105521	0.319012	9.10876e-09	0.0851863	0.00632491	0.00367435	0.954152
NUTF2	3.65342e-68	0	1.36797e-38	0	0.61575	0.105426	0.319765	9.08929e-09	0.0852379	0.0385973	0.0224262	0.954152
ABCA6	2.17824e-68	0	1.27999e-38	0	0.615889	0.103969	0.317895	8.63954e-09	0.0853319	-0.0033578	0.00195157	0.954152
WDR38	3.12369e-68	0	1.33549e-38	0	0.618832	0.107354	0.319459	8.74733e-09	0.0853427	-0.00983833	0.00571828	0.954152
KLHL1	2.55743e-68	0	1.2288e-38	0	0.617829	0.10399	0.32099	8.4591e-09	0.0853732	-0.00447518	0.00260134	0.954152
COLGALT1	4.41388e-68	0	1.27424e-38	0	0.616067	0.106825	0.323309	9.77685e-09	0.0853774	0.00339108	0.0019712	0.954152
CLDN19	2.77243e-68	0	1.28889e-38	0	0.617318	0.10546	0.323332	9.0204e-09	0.0854193	-0.00695436	0.00404304	0.954152
TSACC	3.23962e-68	0	1.33685e-38	0	0.617904	0.106023	0.322581	9.18018e-09	0.085465	-0.0150755	0.00876569	0.954152
EPM2AIP1	3.01894e-68	0	1.2814e-38	0	0.617504	0.107841	0.321479	9.31836e-09	0.0854987	-0.00724085	0.00421066	0.954152
PSG8	2.56564e-68	0	1.15725e-38	0	0.609986	0.106034	0.319675	9.50651e-09	0.0855181	-0.0076219	0.00443252	0.954152
HIST1H3E	3.84159e-68	0	1.31335e-38	0	0.615759	0.105406	0.323847	8.72332e-09	0.0855209	0.0107007	0.00622307	0.954152
PC	5.03103e-68	0	1.27439e-38	0	0.61736	0.107712	0.319058	9.36463e-09	0.0855457	0.00358726	0.00208636	0.954152
MED18	3.87918e-68	0	1.35395e-38	0	0.618478	0.104951	0.321795	8.86998e-09	0.0856255	0.00918438	0.00534301	0.954152
ICK	3.08531e-68	0	1.25249e-38	0	0.622227	0.106289	0.32259	9.18303e-09	0.0856341	-0.00782164	0.00455037	0.954152
RPS6KL1	3.86499e-68	0	1.25234e-38	0	0.619035	0.105342	0.320132	9.68624e-09	0.0856736	0.00573087	0.00333445	0.954152
DTNA	4.40054e-68	0	1.22454e-38	0	0.623916	0.104606	0.324141	8.62279e-09	0.0857584	0.00438474	0.00255191	0.954152
FCAMR	5.28115e-68	0	1.35852e-38	0	0.616469	0.104345	0.319817	9.25141e-09	0.0857713	0.0044965	0.00261706	0.954152
TOR1A	2.81499e-68	0	1.25233e-38	0	0.618719	0.104853	0.320679	8.71361e-09	0.0858159	-0.00702168	0.00408735	0.954152
ANKRD62	4.91089e-68	0	1.37323e-38	0	0.618368	0.107509	0.319666	8.71427e-09	0.0858419	0.0117294	0.00682831	0.954152
PYCR1	2.77181e-68	0	1.34359e-38	0	0.619152	0.104151	0.324208	9.86694e-09	0.0858436	-0.00655849	0.00381806	0.954152
CEND1	3.1067e-68	0	1.28796e-38	0	0.617601	0.105752	0.323817	9.23456e-09	0.0859232	-0.0135283	0.0078776	0.954152
SNRPN	3.04258e-68	0	1.26008e-38	0	0.615954	0.105901	0.319648	9.17831e-09	0.0860029	-0.0208327	0.012134	0.954152
LTK	4.91717e-68	0	1.19008e-38	0	0.61495	0.104053	0.321531	9.17921e-09	0.0860244	0.00214993	0.00125231	0.954152
SAMD11	5.37612e-68	0	1.1824e-38	0	0.619013	0.106412	0.317718	9.50916e-09	0.0860563	0.00313661	0.00182723	0.954152
AVP	4.18384e-68	0	1.25354e-38	0	0.624315	0.105755	0.31855	8.91523e-09	0.0860567	0.0109489	0.00637828	0.954152
KCNMA1	4.18623e-68	0	1.2278e-38	0	0.616512	0.106647	0.321752	8.45642e-09	0.086139	0.00518987	0.00302415	0.954152
HOXC11	2.55376e-68	0	1.35487e-38	0	0.612478	0.106058	0.322067	7.95202e-09	0.0861783	-0.00501316	0.00292155	0.954152
PLB1	1.91097e-68	0	1.23697e-38	0	0.613227	0.106023	0.319719	9.96794e-09	0.0863306	-0.00252274	0.00147091	0.954152
ITPKB	4.41057e-68	0	1.26935e-38	0	0.613591	0.10553	0.321748	8.19612e-09	0.0863766	0.00433474	0.00252778	0.954152
GABBR2	4.08115e-68	0	1.33315e-38	0	0.619355	0.10506	0.319958	8.65996e-09	0.0864216	0.00838498	0.00489035	0.954152
SH3YL1	2.50596e-68	0	1.14534e-38	0	0.616063	0.106077	0.322376	8.98766e-09	0.0864817	-0.00807968	0.0047132	0.954152
TMEM8A	4.93629e-68	0	1.38453e-38	0	0.618685	0.105559	0.325354	8.47263e-09	0.0865253	0.00301877	0.00176121	0.954152
RNF219	2.27722e-68	0	1.2641e-38	0	0.614635	0.102583	0.323114	8.06167e-09	0.0865644	-0.00431396	0.00251717	0.954152
PPM1D	3.84916e-68	0	1.21718e-38	0	0.620668	0.10716	0.326519	8.62605e-09	0.0866437	0.00758672	0.00442791	0.954152
PXYLP1	4.13944e-68	0	1.18923e-38	0	0.61842	0.105852	0.324926	9.16308e-09	0.0866524	0.00591141	0.00345023	0.954152
ALDH18A1	3.99063e-68	0	1.11946e-38	0	0.620869	0.104937	0.324514	8.6633e-09	0.0867267	0.00463912	0.00270829	0.954152
GSS	4.12549e-68	0	1.22908e-38	0	0.624066	0.104298	0.320844	8.30446e-09	0.0867528	0.00416608	0.00243233	0.954152
C15orf41	4.05518e-68	0	1.45429e-38	0	0.61452	0.104713	0.321563	9.30254e-09	0.0867675	0.006622	0.00386638	0.954152
SPATA3	4.07548e-68	0	1.28661e-38	0	0.617015	0.105557	0.319019	8.94387e-09	0.08677	0.00765032	0.00446682	0.954152
C8orf44	2.24662e-68	0	1.15296e-38	0	0.611664	0.106331	0.323164	7.64334e-09	0.0868298	-0.00546407	0.00319093	0.954152
TCP10L2	4.46591e-68	0	1.25312e-38	0	0.61724	0.103998	0.321246	9.32526e-09	0.0868665	0.00451699	0.00263816	0.954152
SOD1	3.37636e-68	0	1.20963e-38	0	0.62008	0.105699	0.32193	9.35136e-09	0.0868668	0.0208612	0.0121841	0.954152
PDE6H	3.47472e-68	0	1.20376e-38	0	0.620865	0.10555	0.320742	9.1185e-09	0.0869115	0.0131117	0.00765902	0.954152
AHCYL1	3.30596e-68	0	1.20717e-38	0	0.625967	0.105628	0.322204	9.61756e-09	0.0869187	-0.00931078	0.00543888	0.954152
MERTK	4.32539e-68	0	1.19727e-38	0	0.613277	0.106279	0.325783	8.19619e-09	0.0869368	0.00319941	0.00186904	0.954152
PSMD2	3.90739e-68	0	1.26005e-38	0	0.615449	0.105315	0.323411	8.22479e-09	0.0869942	0.00660842	0.00386122	0.954152
RAD17	4.30343e-68	0	1.21504e-38	0	0.621077	0.106309	0.32149	8.93496e-09	0.0869986	0.00544102	0.00317917	0.954152
PAG1	3.20102e-68	0	1.10566e-38	0	0.621438	0.108216	0.320901	8.75457e-09	0.0870834	-0.0062522	0.00365412	0.954152
NOLC1	4.13418e-68	0	1.24746e-38	0	0.615359	0.108136	0.321798	8.53665e-09	0.087136	0.00534566	0.00312481	0.954152
FAM53B	3.44558e-68	0	1.13733e-38	0	0.613405	0.105596	0.322965	8.79671e-09	0.0871597	0.00840467	0.00491333	0.954152
LRRC72	3.73963e-68	0	1.29142e-38	0	0.618388	0.105078	0.317665	9.23438e-09	0.0871681	0.00744898	0.00435475	0.954152
DCP1B	3.15129e-68	0	1.26261e-38	0	0.622107	0.105721	0.320695	9.55283e-09	0.0872445	-0.00616997	0.0036079	0.954152
CRYAB	2.96449e-68	0	1.32065e-38	0	0.616507	0.106908	0.32216	9.11702e-09	0.0872464	-0.00846781	0.0049516	0.954152
NDUFS6	3.02623e-68	0	1.23705e-38	0	0.61877	0.105265	0.324523	8.47095e-09	0.0872624	-0.0157881	0.00923266	0.954152
RPF2	2.64184e-68	0	1.31994e-38	0	0.611935	0.105733	0.322147	9.6152e-09	0.0872647	-0.00799721	0.00467668	0.954152
LHFPL2	2.81873e-68	0	1.36806e-38	0	0.616554	0.105784	0.324759	8.92709e-09	0.0873149	-0.00497987	0.00291263	0.954152
ISYNA1	2.36485e-68	0	1.27434e-38	0	0.614308	0.106753	0.324873	7.0481e-09	0.0873822	-0.00364404	0.00213179	0.954152
NFU1	2.58018e-68	0	1.15818e-38	0	0.614781	0.104766	0.321741	8.81605e-09	0.0874283	-0.00868099	0.00507918	0.954152
FBXO44	2.6407e-68	0	1.35571e-38	0	0.616953	0.105098	0.321951	8.37693e-09	0.0874413	-0.00443383	0.0025943	0.954152
TUBA3C	3.78759e-68	0	1.12588e-38	0	0.608742	0.105165	0.318731	8.65353e-09	0.0874844	0.0036749	0.00215053	0.954152
TOE1	2.39676e-68	0	1.24405e-38	0	0.614518	0.104971	0.319307	9.40403e-09	0.087536	-0.00459303	0.00268826	0.954152
TM9SF4	3.17135e-68	0	1.34822e-38	0	0.617263	0.108381	0.317695	9.79572e-09	0.0875457	-0.00642799	0.00376236	0.954152
TMEM88B	2.81887e-68	0	1.30156e-38	0	0.614839	0.105889	0.322227	8.49828e-09	0.0876095	-0.0108035	0.00632468	0.954152
KDELC2	4.42961e-68	0	1.1549e-38	0	0.614788	0.104597	0.322059	8.10179e-09	0.0876266	0.00266485	0.00156016	0.954152
NEU4	2.03162e-68	0	1.31979e-38	0	0.618109	0.107308	0.321293	8.29009e-09	0.0876652	-0.00259934	0.00152199	0.954152
CABP7	3.18964e-68	0	1.36448e-38	0	0.616432	0.106828	0.322448	8.86643e-09	0.0876759	-0.00885403	0.00518447	0.954152
C10orf35	3.86189e-68	0	1.28589e-38	0	0.615265	0.105442	0.324282	8.10627e-09	0.0877094	0.00822422	0.00481619	0.954152
ANK1	1.93973e-68	0	1.39628e-38	0	0.611688	0.105153	0.32628	8.48236e-09	0.0879311	-0.00207991	0.00121887	0.954152
EPB41	2.19962e-68	0	1.22574e-38	0	0.61603	0.106152	0.323575	9.38651e-09	0.088	-0.00246589	0.00144538	0.954152
PMPCA	2.81849e-68	0	1.19123e-38	0	0.618292	0.106047	0.323755	9.68157e-09	0.0880169	-0.00622804	0.00365075	0.954152
DPPA5	3.18431e-68	0	1.28437e-38	0	0.619905	0.105267	0.320713	8.99954e-09	0.0882417	-0.0205181	0.0120358	0.954152
MAP4K4	2.63928e-68	0	1.35402e-38	0	0.61333	0.105439	0.321484	9.12733e-09	0.0885434	-0.00660788	0.00387982	0.954152
EFCAB11	2.92135e-68	0	1.23247e-38	0	0.618215	0.106034	0.319437	9.3488e-09	0.0885951	-0.0114921	0.0067487	0.954152
ADGRF2	2.07802e-68	0	1.26342e-38	0	0.612169	0.106138	0.321439	9.72772e-09	0.0885994	-0.00321896	0.00189035	0.954152
MS4A7	2.72072e-68	0	1.39845e-38	0	0.619068	0.107898	0.320129	9.20245e-09	0.088621	-0.005478	0.00321719	0.954152
NLRP8	2.28098e-68	0	1.19624e-38	0	0.611762	0.104744	0.321541	8.04517e-09	0.0886643	-0.00490345	0.00288015	0.954152
OR52B4	2.99808e-68	0	1.26217e-38	0	0.616275	0.106148	0.323062	9.67532e-09	0.0887407	-0.00717435	0.00421502	0.954152
DLGAP2	2.25215e-68	0	1.27181e-38	0	0.616574	0.105321	0.319989	9.11429e-09	0.0887541	-0.00352426	0.00207064	0.954152
FGF1	4.59715e-68	0	1.2531e-38	0	0.626858	0.105172	0.323779	9.14394e-09	0.0887545	0.0106767	0.006273	0.954152
SH3PXD2B	2.74024e-68	0	1.29326e-38	0	0.619005	0.105693	0.320795	8.77915e-09	0.0888245	-0.00489234	0.00287507	0.954152
ZNF266	4.00331e-68	0	1.31459e-38	0	0.614006	0.104754	0.318826	9.57192e-09	0.0888348	0.00554376	0.00325799	0.954152
NKAIN1	2.84167e-68	0	1.26997e-38	0	0.619037	0.107725	0.319059	8.66667e-09	0.0889217	-0.00480798	0.00282635	0.954152
TEX264	2.83187e-68	0	1.17191e-38	0	0.6139	0.107735	0.319465	8.68901e-09	0.089054	-0.00845731	0.00497366	0.954152
THNSL1	2.47101e-68	0	1.25725e-38	0	0.610054	0.107666	0.32288	8.73007e-09	0.0890663	-0.00522254	0.00307144	0.954152
SLC3A2	2.42214e-68	0	1.17215e-38	0	0.618306	0.105118	0.321922	8.07716e-09	0.0891964	-0.00322279	0.00189614	0.954152
SVOPL	2.22157e-68	0	1.1561e-38	0	0.617387	0.105888	0.324221	9.24644e-09	0.0892084	-0.00173289	0.00101959	0.954152
AMBP	3.34441e-68	0	1.31372e-38	0	0.616271	0.106273	0.320854	8.85784e-09	0.0893302	0.00703031	0.00413802	0.954152
SUSD4	2.5147e-68	0	1.38768e-38	0	0.61425	0.106869	0.31716	9.47769e-09	0.0893975	-0.0048797	0.00287278	0.954152
FAM153A	2.5737e-68	0	1.05368e-38	0	0.61395	0.106834	0.317932	9.00034e-09	0.0894437	-0.0143715	0.00846203	0.954152
BORCS5	4.63628e-68	0	1.3805e-38	0	0.61914	0.10631	0.323153	8.79223e-09	0.089447	0.00605463	0.00356504	0.954152
IDI2	3.34772e-68	0	1.3717e-38	0	0.61969	0.10521	0.319156	8.30509e-09	0.0895	-0.0109842	0.00646869	0.954152
CCBE1	2.15517e-68	0	1.31395e-38	0	0.611941	0.105339	0.318421	9.04174e-09	0.0895304	-0.00307334	0.00181009	0.954152
PCM1	5.90256e-68	0	1.25156e-38	0	0.617057	0.105681	0.321037	9.15181e-09	0.0895672	0.00164453	0.000968684	0.954152
PLCL2	2.56641e-68	0	1.25478e-38	0	0.613007	0.106415	0.321277	8.97303e-09	0.0895841	-0.00827039	0.00487179	0.954152
RFXAP	3.13591e-68	0	1.09054e-38	0	0.616752	0.105174	0.319666	8.49042e-09	0.0895842	0.0104426	0.00615138	0.954152
CASZ1	5.32438e-68	0	1.18023e-38	0	0.62077	0.106486	0.324797	7.80406e-09	0.0896255	0.00244376	0.00143972	0.954152
AMY2B	4.75717e-68	0	1.32177e-38	0	0.61613	0.104952	0.319057	8.15724e-09	0.0896905	0.00306889	0.00180838	0.954152
CDC27	2.6162e-68	0	1.24601e-38	0	0.615379	0.106468	0.320849	9.13047e-09	0.0897903	-0.00541546	0.00319211	0.954152
USP29	5.15875e-68	0	1.35563e-38	0	0.617003	0.106133	0.322355	9.29952e-09	0.0898688	0.00478911	0.0028236	0.954152
NT5DC1	4.26865e-68	0	1.26398e-38	0	0.618608	0.105701	0.320246	8.72675e-09	0.089889	0.00657825	0.00387869	0.954152
NOSTRIN	3.88737e-68	0	1.24454e-38	0	0.617718	0.105753	0.320856	8.49744e-09	0.0899041	0.00459647	0.00271032	0.954152
ATP8A2	2.40177e-68	0	1.2148e-38	0	0.617645	0.104795	0.322333	9.25313e-09	0.0900523	-0.00375093	0.00221277	0.954152
LAMA3	1.85233e-68	0	1.10682e-38	0	0.618243	0.104656	0.318939	8.93315e-09	0.0900912	-0.00208443	0.0012298	0.954152
TMC1	4.34546e-68	0	1.30798e-38	0	0.618508	0.104122	0.315849	9.3341e-09	0.0902074	0.0036488	0.00215355	0.954152
DUSP23	4.73472e-68	0	1.26063e-38	0	0.614816	0.106286	0.317115	9.61849e-09	0.0902099	0.00334664	0.00197523	0.954152
THEG	2.38118e-68	0	1.09994e-38	0	0.61454	0.106711	0.323944	8.84076e-09	0.0902568	-0.00659189	0.00389119	0.954152
YEATS2	2.34315e-68	0	1.25563e-38	0	0.61572	0.104604	0.319442	9.88104e-09	0.0903989	-0.00426549	0.00251903	0.954152
TRPC1	2.65067e-68	0	1.2249e-38	0	0.610423	0.106417	0.317454	9.10904e-09	0.0904153	-0.00726835	0.00429262	0.954152
BTG4	3.58518e-68	0	1.37067e-38	0	0.613706	0.105796	0.320527	9.03725e-09	0.090449	0.0116863	0.00690254	0.954152
SOCS4	2.71627e-68	0	1.2021e-38	0	0.613227	0.1068	0.321815	9.28123e-09	0.0904532	-0.0058403	0.00344963	0.954152
COMMD5	2.62526e-68	0	1.30604e-38	0	0.617246	0.105846	0.320941	8.93968e-09	0.0904942	-0.00792259	0.00468015	0.954152
CLDN7	3.855e-68	0	1.18701e-38	0	0.614175	0.106992	0.323691	8.44108e-09	0.090505	0.00749167	0.00442574	0.954152
CDH7	2.45e-68	0	1.21934e-38	0	0.615193	0.104282	0.318425	9.59951e-09	0.0905708	-0.00459011	0.00271218	0.954152
PLA1A	3.42252e-68	0	1.18478e-38	0	0.616736	0.106168	0.319764	9.5449e-09	0.0906897	0.00748386	0.00442366	0.954152
TP53I11	2.45773e-68	0	1.1414e-38	0	0.611258	0.104476	0.32303	9.51054e-09	0.0906955	-0.0136178	0.0080495	0.954152
C16orf45	3.94467e-68	0	1.27751e-38	0	0.615025	0.104812	0.318902	9.3078e-09	0.0907185	0.005415	0.00320105	0.954152
NSUN6	2.40841e-68	0	1.23479e-38	0	0.612103	0.103976	0.319054	9.297e-09	0.090719	-0.00496818	0.00293692	0.954152
ADAM12	4.02883e-68	0	1.25615e-38	0	0.616546	0.104915	0.322553	8.45773e-09	0.0907625	0.00377922	0.00223437	0.954152
RPL28	2.94451e-68	0	1.30105e-38	0	0.619569	0.1046	0.320044	8.6533e-09	0.0907819	-0.00992517	0.00586837	0.954152
SIM1	2.70307e-68	0	1.24356e-38	0	0.619129	0.106409	0.323434	7.99135e-09	0.0908266	-0.0043769	0.00258825	0.954152
SLC25A40	1.89356e-68	0	1.13647e-38	0	0.612653	0.104138	0.319238	9.48127e-09	0.090954	-0.00311411	0.00184224	0.954152
EFNA3	3.84505e-68	0	1.36227e-38	0	0.615115	0.10606	0.323906	8.53015e-09	0.0909945	0.0192952	0.011416	0.954152
OR9Q2	4.83483e-68	0	1.29364e-38	0	0.615535	0.106661	0.322815	1.0063e-08	0.0910193	0.00517698	0.0030632	0.954152
FGF6	4.10669e-68	0	1.16077e-38	0	0.616281	0.105057	0.321093	9.7477e-09	0.0910197	0.00337776	0.00199861	0.954152
C12orf56	3.94791e-68	0	1.23131e-38	0	0.61631	0.103761	0.322298	7.96987e-09	0.0911074	0.00357942	0.00211851	0.954152
NTPCR	3.6146e-68	0	1.27833e-38	0	0.618293	0.104974	0.317756	8.86484e-09	0.0911291	0.0109869	0.00650314	0.954152
MMEL1	2.32174e-68	0	1.23894e-38	0	0.619295	0.105826	0.321349	9.09471e-09	0.0911885	-0.00252967	0.00149758	0.954152
ZNRF4	4.14586e-68	0	1.25045e-38	0	0.615161	0.106995	0.320573	9.01549e-09	0.0911894	0.0102341	0.00605864	0.954152
WBP1L	2.68501e-68	0	1.08974e-38	0	0.615609	0.106147	0.322362	8.98431e-09	0.0912625	-0.00827055	0.00489733	0.954152
BTBD11	3.99213e-68	0	1.20985e-38	0	0.612713	0.10571	0.326606	8.36886e-09	0.0913267	0.00435831	0.00258125	0.954152
RPL18A	3.66658e-68	0	1.27461e-38	0	0.616967	0.106313	0.321649	8.52298e-09	0.0913328	0.0122217	0.00723856	0.954152
STEAP2	4.08901e-68	0	1.30117e-38	0	0.613171	0.105182	0.323337	8.6765e-09	0.0914567	0.00325218	0.0019269	0.954152
DDIAS	2.3399e-68	0	1.2351e-38	0	0.610296	0.106115	0.319877	9.28567e-09	0.0914799	-0.00455414	0.0026985	0.954152
CCNA1	2.83285e-68	0	1.23826e-38	0	0.618322	0.107128	0.323457	8.56085e-09	0.0915209	-0.00718493	0.00425788	0.954152
CHST15	4.28745e-68	0	1.29574e-38	0	0.617973	0.10634	0.32178	8.82094e-09	0.091578	0.00789494	0.00467947	0.954152
RNF39	4.11083e-68	0	1.2461e-38	0	0.617004	0.104078	0.317943	8.71869e-09	0.0916138	0.00519334	0.00307852	0.954152
PPIL2	2.19415e-68	0	1.25629e-38	0	0.617359	0.106123	0.320422	8.37076e-09	0.0916546	-0.00246385	0.00146071	0.954152
H1FNT	3.9069e-68	0	1.23031e-38	0	0.615874	0.10576	0.322844	9.32206e-09	0.0917418	0.00929584	0.0055126	0.954152
TMEM212	3.44386e-68	0	1.41709e-38	0	0.618065	0.105204	0.323615	8.99666e-09	0.0917777	-0.0110642	0.00656199	0.954152
DNAJB13	2.26897e-68	0	1.36676e-38	0	0.613213	0.105118	0.320396	9.29114e-09	0.0917795	-0.00368396	0.0021849	0.954152
SOWAHC	3.55859e-68	0	1.30321e-38	0	0.615239	0.105595	0.319414	8.95982e-09	0.0918086	0.00713159	0.00423003	0.954152
HRH1	2.5296e-68	0	1.32222e-38	0	0.616333	0.104298	0.323857	9.17818e-09	0.0919451	-0.00721976	0.00428412	0.954152
PSMD6	3.8039e-68	0	1.23884e-38	0	0.617604	0.105373	0.322216	9.11253e-09	0.091947	0.00464773	0.00275793	0.954152
PANK3	2.83232e-68	0	1.26498e-38	0	0.617716	0.105526	0.325411	8.57166e-09	0.0919549	-0.0127916	0.00759064	0.954152
TMTC3	3.03838e-68	0	1.38956e-38	0	0.615383	0.107443	0.321463	9.14255e-09	0.0919838	-0.00552327	0.00327783	0.954152
AHSA1	4.62031e-68	0	1.32902e-38	0	0.618391	0.10599	0.320225	9.11213e-09	0.0919858	0.00838001	0.00497322	0.954152
TRIB3	6.02762e-68	0	1.30049e-38	0	0.620496	0.107077	0.323551	8.6059e-09	0.0920207	0.00218877	0.00129909	0.954152
ZNF653	2.43527e-68	0	1.31386e-38	0	0.613277	0.105472	0.322064	9.15728e-09	0.0920619	-0.00482771	0.00286574	0.954152
KCNIP1	4.17815e-68	0	1.3441e-38	0	0.62347	0.106697	0.320561	8.9707e-09	0.0920659	0.0106363	0.0063138	0.954152
SUPT5H	3.52019e-68	0	1.23806e-38	0	0.612771	0.105903	0.323485	8.41392e-09	0.0921217	0.00555379	0.00329734	0.954152
ANP32E	2.57246e-68	0	1.26869e-38	0	0.613519	0.105552	0.318091	8.44109e-09	0.0921448	-0.00874741	0.0051938	0.954152
FAM118B	2.8069e-68	0	1.31651e-38	0	0.612107	0.106822	0.319399	9.5144e-09	0.0921552	-0.00833396	0.00494847	0.954152
MUC22	3.90197e-68	0	1.22987e-38	0	0.617708	0.104313	0.315994	8.67402e-09	0.0922358	-0.00645174	0.00383181	0.954152
CD48	5.14354e-68	0	1.30107e-38	0	0.624886	0.107049	0.318973	9.57064e-09	0.0923612	0.00688579	0.00409118	0.954152
CACNA1E	4.27492e-68	0	1.28661e-38	0	0.614063	0.10452	0.323846	9.21851e-09	0.0923873	0.0029785	0.00176981	0.954152
CLN3	4.22831e-68	0	1.19054e-38	0	0.622369	0.104883	0.322874	8.89058e-09	0.0924291	0.00522026	0.00310225	0.954152
SMYD3	3.89303e-68	0	1.14216e-38	0	0.616045	0.105508	0.32128	9.60111e-09	0.0924489	0.00536347	0.00318755	0.954152
TAGLN2	2.90239e-68	0	1.31739e-38	0	0.614121	0.104503	0.323692	9.21727e-09	0.0924738	-0.0089653	0.00532855	0.954152
CCDC6	2.81803e-68	0	1.27698e-38	0	0.615501	0.105341	0.315344	9.41985e-09	0.0925727	-0.00900877	0.00535602	0.954152
CCL14	3.49607e-68	0	1.24977e-38	0	0.613193	0.106048	0.321314	9.17016e-09	0.0926594	0.0110458	0.00656884	0.954152
DENND1C	3.6931e-68	0	1.24004e-38	0	0.617653	0.10416	0.322173	8.95539e-09	0.0926757	0.00519101	0.0030872	0.954152
CARMIL2	1.82304e-68	0	1.24841e-38	0	0.615976	0.106915	0.323052	9.16079e-09	0.092746	-0.00209055	0.00124356	0.954152
CPB2	2.57681e-68	0	1.20201e-38	0	0.612485	0.103973	0.325014	8.40921e-09	0.0927807	-0.00761473	0.0045301	0.954152
COTL1	2.76313e-68	0	1.25619e-38	0	0.619262	0.10647	0.31884	9.51143e-09	0.092833	-0.00617449	0.00367387	0.954152
SOX13	4.45609e-68	0	1.16141e-38	0	0.61266	0.104634	0.319159	8.95975e-09	0.0929353	0.00297173	0.00176876	0.954152
IL2RG	3.34763e-68	0	1.23739e-38	0	0.622323	0.1056	0.323208	9.02774e-09	0.092943	-0.0172594	0.0102729	0.954152
FOXD2	4.94865e-68	0	1.35756e-38	0	0.620752	0.10611	0.320507	8.99727e-09	0.0929732	0.00744168	0.00442976	0.954152
PRDM9	2.0233e-68	0	1.21012e-38	0	0.620331	0.105763	0.320841	9.01195e-09	0.093141	-0.00288691	0.00171935	0.954152
MPIG6B	3.64464e-68	0	1.26274e-38	0	0.61418	0.104823	0.322545	8.49434e-09	0.0931543	0.00944221	0.00562371	0.954152
OPTC	2.28976e-68	0	1.29318e-38	0	0.615771	0.106528	0.320573	9.66827e-09	0.0931817	-0.00240448	0.00143221	0.954152
TSPAN18	2.65414e-68	0	1.30481e-38	0	0.613379	0.105543	0.322983	8.59843e-09	0.0932458	-0.0072512	0.00431997	0.954152
NRIP2	4.69673e-68	0	1.14728e-38	0	0.620962	0.106646	0.32475	8.47945e-09	0.0932642	0.00353067	0.00210355	0.954152
ZNF79	2.4315e-68	0	1.14331e-38	0	0.612591	0.105826	0.321264	9.55783e-09	0.0933028	-0.0071582	0.00426531	0.954152
DENND1B	2.59187e-68	0	1.25971e-38	0	0.609586	0.107226	0.320562	8.66042e-09	0.0933995	-0.00568722	0.00338981	0.954152
CSN2	3.11642e-68	0	1.21903e-38	0	0.6181	0.105668	0.320649	8.92647e-09	0.0934053	-0.0158817	0.00946627	0.954152
NCMAP	2.98133e-68	0	1.4051e-38	0	0.610491	0.104987	0.318196	9.11625e-09	0.0934331	-0.0128375	0.00765246	0.954152
RAET1L	3.54648e-68	0	1.22953e-38	0	0.618049	0.10649	0.325134	9.42702e-09	0.0935118	0.00607164	0.00362017	0.954152
MANSC4	2.40298e-68	0	1.24778e-38	0	0.611167	0.104244	0.32002	9.06671e-09	0.093514	-0.0106211	0.00633281	0.954152
HPS6	2.57211e-68	0	1.27666e-38	0	0.617636	0.103269	0.319318	9.19123e-09	0.0936433	-0.00444574	0.0026518	0.954152
HADH	4.73085e-68	0	1.2886e-38	0	0.611247	0.107285	0.318195	9.69103e-09	0.0936764	0.00272527	0.00162574	0.954152
DNAJC10	6.31637e-68	0	1.35916e-38	0	0.62298	0.105182	0.323894	8.16996e-09	0.0938167	0.00296861	0.00177166	0.954152
HARS2	3.76328e-68	0	1.23597e-38	0	0.614528	0.104995	0.324358	9.11107e-09	0.0939344	0.0050275	0.00300147	0.954152
TIMM10B	3.27608e-68	0	1.3107e-38	0	0.619976	0.105516	0.323051	8.84564e-09	0.0939711	-0.022741	0.0135781	0.954152
NRG3	2.57551e-68	0	1.35761e-38	0	0.617464	0.104957	0.317073	9.92382e-09	0.0940489	-0.00334858	0.00199983	0.954152
HIST1H1T	2.81404e-68	0	1.33466e-38	0	0.617871	0.105924	0.321427	8.77198e-09	0.0940616	-0.00669607	0.00399918	0.954152
MDP1	3.55983e-68	0	1.30731e-38	0	0.614076	0.106275	0.318274	8.77729e-09	0.0940626	0.023199	0.0138554	0.954152
PLEKHA1	2.99695e-68	0	1.23827e-38	0	0.619653	0.105911	0.320166	9.30504e-09	0.0940882	-0.00564178	0.00336978	0.954152
C20orf96	3.4178e-68	0	1.3905e-38	0	0.616827	0.105515	0.320649	1.00178e-08	0.0941545	0.00715319	0.00427339	0.954152
HNRNPA3	3.37957e-68	0	1.24284e-38	0	0.617843	0.105254	0.324488	8.38383e-09	0.0942311	0.0199471	0.0119194	0.954152
AGAP1	2.51825e-68	0	1.32139e-38	0	0.617935	0.105909	0.319168	9.22522e-09	0.0942637	-0.00376281	0.00224869	0.954152
LRRFIP1	2.08002e-68	0	1.20944e-38	0	0.614419	0.105353	0.324475	7.78137e-09	0.0942817	-0.00277289	0.00165719	0.954152
ESRP1	4.58321e-68	0	1.32251e-38	0	0.62074	0.106258	0.320319	8.48514e-09	0.0943088	0.00598679	0.00357825	0.954152
BIRC5	3.22629e-68	0	1.20766e-38	0	0.619087	0.10774	0.326791	8.46011e-09	0.0943225	-0.0140077	0.00837261	0.954152
HSDL2	2.35242e-68	0	1.18575e-38	0	0.612518	0.105809	0.321696	8.98186e-09	0.0943405	-0.005235	0.00312921	0.954152
RPL26L1	4.86875e-68	0	1.26532e-38	0	0.61968	0.105043	0.323978	8.54878e-09	0.0943705	0.00558729	0.0033401	0.954152
OCM	2.31661e-68	0	1.3847e-38	0	0.613085	0.104431	0.316325	8.60625e-09	0.094418	-0.00190421	0.00113851	0.954152
DACH1	3.93021e-68	0	1.33699e-38	0	0.613629	0.105498	0.32508	9.15814e-09	0.0946148	0.00593532	0.00355078	0.954152
C7orf49	3.62089e-68	0	1.28965e-38	0	0.614497	0.106172	0.319028	9.84083e-09	0.0946334	0.0126972	0.00759648	0.954152
ALPI	2.75736e-68	0	1.24547e-38	0	0.615063	0.105035	0.320868	9.4203e-09	0.0946781	-0.00609134	0.00364482	0.954152
HOXB9	2.70039e-68	0	1.29389e-38	0	0.616463	0.105618	0.321969	1.0036e-08	0.0947006	-0.00517911	0.00309919	0.954152
PARG	2.22503e-68	0	1.10963e-38	0	0.613809	0.10668	0.322425	8.71719e-09	0.0947508	-0.00529889	0.00317135	0.954152
YES1	4.09863e-68	0	1.18316e-38	0	0.614614	0.104741	0.322654	9.1263e-09	0.0947781	0.00557046	0.00333415	0.954152
HK2	2.23887e-68	0	1.24038e-38	0	0.616459	0.106561	0.320928	7.8655e-09	0.094796	-0.00269556	0.0016135	0.954152
LRRC55	3.3028e-68	0	1.18862e-38	0	0.612323	0.105655	0.323026	8.89357e-09	0.0949276	0.00719679	0.00430953	0.954152
MYBL2	2.82088e-68	0	1.29254e-38	0	0.615591	0.106331	0.317419	8.96648e-09	0.0949354	-0.0070359	0.00421329	0.954152
INPPL1	2.10546e-68	0	1.14543e-38	0	0.615271	0.105447	0.324561	8.92475e-09	0.094949	-0.00355603	0.00212954	0.954152
EIF4A3	3.46942e-68	0	1.29077e-38	0	0.617352	0.104588	0.321864	9.12451e-09	0.0949872	0.0165397	0.00990601	0.954152
FGF23	3.32874e-68	0	1.13111e-38	0	0.618595	0.106825	0.321896	8.52411e-09	0.0954101	0.014729	0.00883278	0.954152
SLC35G1	4.14745e-68	0	1.35272e-38	0	0.619073	0.105477	0.325188	9.70109e-09	0.0954983	0.00628927	0.0037726	0.954152
C9orf131	5.18491e-68	0	1.25323e-38	0	0.621095	0.104957	0.324734	9.28192e-09	0.0956573	0.00601196	0.00360799	0.954152
NKX6-1	2.66982e-68	0	1.21588e-38	0	0.617969	0.105127	0.322581	8.8855e-09	0.0957828	-0.00709239	0.004258	0.954152
KRTAP4-5	3.76879e-68	0	1.54968e-38	0	0.617001	0.105865	0.323821	9.11841e-09	0.0958684	0.00773889	0.00464733	0.954152
FOXR2	2.63015e-68	0	1.24232e-38	0	0.610142	0.106216	0.324189	9.21263e-09	0.0958968	0.0120922	0.00726217	0.954152
TRAK1	2.04817e-68	0	1.27163e-38	0	0.615989	0.105475	0.322209	8.82037e-09	0.0959013	-0.00205658	0.00123513	0.954152
CCNB1IP1	3.07497e-68	0	1.31789e-38	0	0.617189	0.104222	0.321433	9.02328e-09	0.095982	-0.0134376	0.00807224	0.954152
NUPL2	2.57435e-68	0	1.13081e-38	0	0.613449	0.104544	0.318173	8.87479e-09	0.0960726	-0.00483817	0.00290718	0.954152
PLK3	3.80077e-68	0	1.22249e-38	0	0.615797	0.104421	0.324131	8.22376e-09	0.0961194	0.00349729	0.00210177	0.954152
CD2	3.11921e-68	0	1.25096e-38	0	0.620718	0.105691	0.320411	9.96855e-09	0.09615	-0.00846588	0.00508821	0.954152
LZTFL1	3.58538e-68	0	1.3266e-38	0	0.61598	0.106691	0.323734	9.12653e-09	0.0961743	0.0120348	0.00723374	0.954152
GBA2	2.61576e-68	0	1.34597e-38	0	0.616022	0.105128	0.320288	8.12671e-09	0.0962818	-0.00417136	0.00250809	0.954152
HIST1H2AA	3.30198e-68	0	1.26511e-38	0	0.619962	0.107427	0.323906	8.87192e-09	0.096522	-0.0163224	0.00982114	0.954152
AAED1	3.51683e-68	0	1.20853e-38	0	0.614842	0.103663	0.322097	8.02358e-09	0.0965544	0.00513496	0.00309	0.954152
ITGB8	2.75343e-68	0	1.36133e-38	0	0.61595	0.10414	0.322193	9.6864e-09	0.0965891	-0.00681721	0.00410272	0.954152
CFAP221	4.04057e-68	0	1.30898e-38	0	0.612184	0.107009	0.321912	8.53776e-09	0.0966278	0.00472662	0.0028449	0.954152
BTF3L4	3.16585e-68	0	1.27295e-38	0	0.615871	0.105486	0.323224	8.59286e-09	0.0966709	-0.0363029	0.0218531	0.954152
ZC3H7A	3.43701e-68	0	1.23029e-38	0	0.614286	0.105573	0.323587	8.56344e-09	0.0966915	0.00716875	0.00431561	0.954152
SLC22A18	2.66445e-68	0	1.29982e-38	0	0.621116	0.105591	0.324156	8.9162e-09	0.0966929	-0.00310049	0.00186651	0.954152
PRMT5	3.09179e-68	0	1.28987e-38	0	0.621983	0.104664	0.320164	8.98735e-09	0.0967019	-0.00761909	0.00458686	0.954152
RNPEP	3.83614e-68	0	1.17598e-38	0	0.614102	0.105879	0.321222	9.10125e-09	0.0967267	0.00360893	0.00217282	0.954152
NEFM	2.50193e-68	0	1.30895e-38	0	0.613248	0.106111	0.321236	8.39914e-09	0.0967653	-0.00541158	0.00325851	0.954152
EIF4A2	3.18153e-68	0	1.24088e-38	0	0.617004	0.105095	0.324012	8.88577e-09	0.0967891	-0.0218228	0.0131412	0.954152
RBMXL1	6.37318e-68	0	1.23026e-38	0	0.625118	0.105227	0.324953	8.75832e-09	0.0967976	0.00328646	0.00197909	0.954152
ATXN2L	5.02901e-68	0	1.36506e-38	0	0.617802	0.106919	0.320955	8.2812e-09	0.0968617	0.00322409	0.0019419	0.954152
MYRF	4.13261e-68	0	1.22474e-38	0	0.614404	0.106032	0.320596	7.92331e-09	0.0968789	0.00374412	0.00225524	0.954152
LALBA	3.24583e-68	0	1.31412e-38	0	0.614842	0.105234	0.321145	9.52406e-09	0.0968818	0.0193425	0.0116509	0.954152
HIVEP2	2.31856e-68	0	1.39365e-38	0	0.615399	0.107818	0.32161	9.64777e-09	0.0968972	-0.00270171	0.00162744	0.954152
SERPINA1	5.42186e-68	0	1.23074e-38	0	0.621125	0.106002	0.323012	7.97178e-09	0.096914	0.00318097	0.00191623	0.954152
AUH	3.02136e-68	0	1.29444e-38	0	0.618531	0.106304	0.319036	8.87908e-09	0.0969782	-0.00623749	0.00375822	0.954152
GDE1	4.10205e-68	0	1.30621e-38	0	0.614515	0.107118	0.319683	8.68037e-09	0.0970026	0.00785177	0.0047312	0.954152
SPINK4	3.19229e-68	0	1.39082e-38	0	0.620252	0.106306	0.32166	9.54266e-09	0.0970428	-0.00759882	0.00457933	0.954152
KRTAP10-1	4.01041e-68	0	1.31882e-38	0	0.620027	0.107699	0.322614	8.67924e-09	0.0970788	0.0101177	0.00609797	0.954152
BPIFC	3.93573e-68	0	1.23202e-38	0	0.611274	0.107432	0.323164	8.90754e-09	0.097154	0.00435967	0.00262817	0.954152
ATG4D	2.59892e-68	0	1.26363e-38	0	0.618151	0.106567	0.323427	9.39496e-09	0.0971865	-0.0041838	0.0025224	0.954152
TINAGL1	2.8733e-68	0	1.21146e-38	0	0.619436	0.103703	0.321293	8.74025e-09	0.0972556	-0.0052853	0.00318715	0.954152
WDR55	3.64067e-68	0	1.16003e-38	0	0.61402	0.104777	0.321089	9.44143e-09	0.0972589	0.00476611	0.00287409	0.954152
WDR59	3.8527e-68	0	1.23052e-38	0	0.611767	0.106825	0.324203	8.23577e-09	0.0973176	0.00364035	0.00219561	0.954152
OGN	2.92938e-68	0	1.31535e-38	0	0.619023	0.104157	0.323482	8.77812e-09	0.0973274	-0.0097299	0.0058686	0.954152
BBOF1	4.77898e-68	0	1.23289e-38	0	0.61811	0.105642	0.321911	8.0943e-09	0.0974799	0.00392751	0.00236996	0.954152
ZNF232	4.05483e-68	0	1.28299e-38	0	0.617991	0.106629	0.32464	8.6032e-09	0.0974974	0.00793107	0.00478605	0.954152
PTPN1	4.30699e-68	0	1.33022e-38	0	0.61588	0.104508	0.319547	8.94448e-09	0.097672	0.00910061	0.00549468	0.954152
CCDC94	4.93511e-68	0	1.31701e-38	0	0.619378	0.105715	0.325807	8.86293e-09	0.0977733	0.00384562	0.00232258	0.954152
ENOPH1	2.71311e-68	0	1.24946e-38	0	0.613125	0.105587	0.319438	9.0022e-09	0.097888	-0.0119161	0.00719924	0.954152
SDHAF4	2.76269e-68	0	1.19023e-38	0	0.619264	0.105191	0.322099	8.36929e-09	0.0979032	-0.00559419	0.00337994	0.954152
GJD2	2.9962e-68	0	1.20505e-38	0	0.616571	0.105249	0.321254	8.20628e-09	0.0979237	-0.0137305	0.00829631	0.954152
ACAD8	2.73763e-68	0	1.36128e-38	0	0.615648	0.105191	0.317819	9.65136e-09	0.0980756	-0.00453306	0.00274022	0.954152
RPP14	4.12018e-68	0	1.30551e-38	0	0.621296	0.105863	0.320623	9.20811e-09	0.0981873	0.006269	0.00379086	0.954152
MRPS11	2.82152e-68	0	1.3209e-38	0	0.614882	0.10603	0.320272	8.96619e-09	0.0981974	-0.00631789	0.00382053	0.954152
PPA2	4.75397e-68	0	1.41441e-38	0	0.618073	0.107088	0.321887	9.26807e-09	0.098213	0.00378501	0.00228897	0.954152
LBH	3.51303e-68	0	1.13616e-38	0	0.617285	0.105529	0.318483	9.30423e-09	0.0982171	0.0152682	0.0092335	0.954152
NRXN3	2.38439e-68	0	1.27476e-38	0	0.616247	0.105735	0.319092	8.96796e-09	0.0982303	-0.00366187	0.00221461	0.954152
FLII	5.39852e-68	0	1.31252e-38	0	0.611584	0.10523	0.319409	8.66875e-09	0.0982419	0.00241759	0.00146215	0.954152
RYR1	8.38887e-68	0	1.28328e-38	0	0.622608	0.104161	0.323085	8.56056e-09	0.0982441	0.00145191	0.000878115	0.954152
SFN	3.58293e-68	0	1.16125e-38	0	0.615271	0.106213	0.321537	9.20797e-09	0.0983314	0.00554366	0.00335368	0.954152
PEF1	4.62891e-68	0	1.3345e-38	0	0.61621	0.106162	0.322602	9.1144e-09	0.0983455	0.00579643	0.00350674	0.954152
STX10	4.01738e-68	0	1.2162e-38	0	0.617272	0.10655	0.320393	8.66421e-09	0.0985002	0.00707598	0.00428282	0.954152
REM1	2.84759e-68	0	1.40549e-38	0	0.61293	0.107551	0.318045	9.43867e-09	0.0985091	-0.00501764	0.00303706	0.954152
STRIP2	2.5156e-68	0	1.3144e-38	0	0.622909	0.104131	0.320371	9.76631e-09	0.0985135	-0.00259362	0.00156988	0.954152
PDE3B	2.13647e-68	0	1.26744e-38	0	0.613447	0.105264	0.320636	9.18139e-09	0.0985848	-0.00221417	0.00134049	0.954152
MUTYH	5.01092e-68	0	1.3281e-38	0	0.616443	0.106077	0.320058	1.03255e-08	0.0985927	0.00267927	0.0016221	0.954152
AGK	2.53569e-68	0	1.31129e-38	0	0.611155	0.104862	0.322229	9.19365e-09	0.0986575	-0.00587826	0.00355954	0.954152
GMPPA	2.39959e-68	0	1.22355e-38	0	0.614169	0.104071	0.322085	8.48499e-09	0.0986764	-0.00439116	0.00265919	0.954152
SPEN	4.38499e-68	0	1.27137e-38	0	0.617901	0.105593	0.323362	9.45663e-09	0.0986843	0.00237856	0.00144044	0.954152
NR1H2	2.89118e-68	0	1.27321e-38	0	0.617539	0.107432	0.324719	9.24163e-09	0.0987306	-0.00711683	0.00431049	0.954152
RALGAPA2	2.24729e-68	0	1.29961e-38	0	0.615897	0.10533	0.322721	9.25555e-09	0.0987418	-0.00281504	0.00170506	0.954152
JAM2	3.57172e-68	0	1.33459e-38	0	0.611137	0.10551	0.319545	9.26612e-09	0.0987462	0.00864812	0.00523819	0.954152
CCIN	4.588e-68	0	1.27566e-38	0	0.61742	0.1077	0.327032	8.80069e-09	0.0987946	0.00421622	0.00255415	0.954152
SMOC2	5.49535e-68	0	1.15683e-38	0	0.621299	0.105312	0.321775	8.03017e-09	0.0988248	0.00297346	0.00180145	0.954152
KXD1	3.19629e-68	0	1.23506e-38	0	0.616419	0.106891	0.322416	8.01343e-09	0.0988593	-0.00898504	0.00544409	0.954152
TSGA10	2.56173e-68	0	1.18994e-38	0	0.617743	0.10627	0.318491	9.88712e-09	0.0988887	-0.00433411	0.00262629	0.954152
LCORL	2.91934e-68	0	1.30311e-38	0	0.613912	0.10904	0.321923	8.63618e-09	0.0988939	-0.0112763	0.00683306	0.954152
NEDD1	4.19159e-68	0	1.26284e-38	0	0.61483	0.105098	0.323035	8.90843e-09	0.0989092	0.0045748	0.00277231	0.954152
ADO	3.83985e-68	0	1.2979e-38	0	0.620206	0.106161	0.321498	9.4626e-09	0.0989513	0.0176837	0.0107176	0.954152
MEX3C	4.0005e-68	0	1.24932e-38	0	0.61408	0.105527	0.322622	7.84748e-09	0.0990061	0.00708748	0.00429622	0.954152
RIT1	2.73937e-68	0	1.2283e-38	0	0.612348	0.106633	0.322089	8.76534e-09	0.0990585	-0.0125309	0.00759703	0.954152
MFSD7	4.75287e-68	0	1.32528e-38	0	0.614403	0.103649	0.320012	1.06764e-08	0.0990959	0.00316299	0.00191782	0.954152
PON3	4.80521e-68	0	1.29984e-38	0	0.618784	0.104999	0.320553	8.59008e-09	0.0991122	0.00271426	0.00164582	0.954152
SSC4D	2.48283e-68	0	1.25892e-38	0	0.615291	0.107903	0.318533	9.06092e-09	0.0991343	-0.00482708	0.00292714	0.954152
SWSAP1	2.45478e-68	0	1.31816e-38	0	0.616169	0.105888	0.324314	1.00249e-08	0.0992045	-0.0031879	0.00193355	0.954152
OIP5	2.78376e-68	0	1.16854e-38	0	0.618673	0.105911	0.325124	9.31064e-09	0.0992252	-0.00668419	0.00405439	0.954152
JRKL	3.56846e-68	0	1.3898e-38	0	0.613369	0.105488	0.32374	8.58423e-09	0.0993367	0.00983466	0.00596731	0.954152
ZNF500	4.09784e-68	0	1.27205e-38	0	0.616173	0.106033	0.319725	9.38084e-09	0.0993467	0.00492396	0.00298777	0.954152
SLC22A13	5.15938e-68	0	1.24097e-38	0	0.617935	0.104675	0.321262	9.1316e-09	0.0993542	0.00420336	0.00255058	0.954152
PGBD1	4.63007e-68	0	1.29319e-38	0	0.618497	0.105085	0.321921	7.91575e-09	0.0994102	0.00325368	0.00197465	0.954152
KRBA2	2.60788e-68	0	1.34987e-38	0	0.614423	0.103715	0.323173	9.08699e-09	0.0994324	-0.00743222	0.00451088	0.954152
INPP5K	3.81605e-68	0	1.12957e-38	0	0.616983	0.107124	0.322526	8.48336e-09	0.099521	0.00577461	0.00350573	0.954152
NEUROG3	3.65618e-68	0	1.46276e-38	0	0.618142	0.106915	0.321053	9.08489e-09	0.0995345	-0.0126744	0.00769488	0.954152
GAGE1	3.29265e-68	0	1.30512e-38	0	0.611844	0.105307	0.319752	8.93929e-09	0.0995809	0.0287039	0.0174291	0.954152
PIGH	3.11049e-68	0	1.26486e-38	0	0.619364	0.106017	0.3212	8.98404e-09	0.0995913	-0.00742739	0.00451006	0.954152
ME3	3.92427e-68	0	1.25457e-38	0	0.613782	0.104822	0.320318	8.97966e-09	0.0996256	0.00492162	0.00298881	0.954152
FAM35A	4.00888e-68	0	1.25427e-38	0	0.617515	0.108284	0.323051	9.01101e-09	0.099705	0.00762031	0.00462876	0.954152
ZNF799	2.5705e-68	0	1.26983e-38	0	0.612742	0.106816	0.323383	8.92863e-09	0.0997379	-0.00499838	0.00303643	0.954152
ZNF107	5.60662e-68	0	1.3418e-38	0	0.6184	0.105009	0.321376	1.00961e-08	0.0998147	0.0036152	0.00219667	0.954152
SDHC	3.89682e-68	0	1.34304e-38	0	0.621019	0.10589	0.320651	9.67734e-09	0.0998165	0.0108365	0.00658451	0.954152
SPATS1	2.69499e-68	0	1.32402e-38	0	0.612329	0.105073	0.319493	8.63988e-09	0.0998695	-0.00385175	0.00234078	0.954152
HHIPL2	5.18267e-68	0	1.11401e-38	0	0.620935	0.105178	0.322171	8.72587e-09	0.0998906	0.00265686	0.00161473	0.954152
ELAVL1	3.1164e-68	0	1.30843e-38	0	0.615594	0.106297	0.324451	8.7725e-09	0.0999369	-0.0150562	0.00915178	0.954152
HDAC5	2.74465e-68	0	1.37544e-38	0	0.621431	0.10663	0.320147	8.81842e-09	0.100082	-0.00319799	0.0019447	0.954152
OR2T12	2.6869e-68	0	1.19239e-38	0	0.613019	0.105987	0.322067	8.89135e-09	0.100087	0.00910739	0.00553829	0.954152
ATL3	2.57886e-68	0	1.22077e-38	0	0.613799	0.106002	0.325964	7.6525e-09	0.100169	-0.00548483	0.00333618	0.954152
KLHL18	2.67105e-68	0	1.29112e-38	0	0.613563	0.105338	0.321234	8.81987e-09	0.100222	-0.00495001	0.00301134	0.954152
SF3B6	3.0891e-68	0	1.30705e-38	0	0.614326	0.106219	0.32141	8.63382e-09	0.100242	0.0403168	0.0245282	0.954152
MALSU1	2.42321e-68	0	1.20578e-38	0	0.613459	0.104164	0.31954	8.66478e-09	0.100246	-0.00989339	0.00601908	0.954152
EDAR	2.6593e-68	0	1.23929e-38	0	0.614237	0.105941	0.320992	8.86399e-09	0.100259	-0.0052834	0.00321451	0.954152
GOLGB1	2.2181e-68	0	1.3957e-38	0	0.617416	0.10367	0.323916	8.793e-09	0.100269	-0.00246157	0.0014977	0.954152
FGD5	4.65338e-68	0	1.29752e-38	0	0.616741	0.104605	0.32067	8.61277e-09	0.100398	0.00301124	0.00183284	0.954799
N4BP2	3.04224e-68	0	1.32704e-38	0	0.615161	0.107758	0.32777	9.00936e-09	0.10044	-0.00473103	0.00287998	0.954799
AKAIN1	3.75616e-68	0	1.35705e-38	0	0.618133	0.105706	0.319239	8.94865e-09	0.100589	0.0156245	0.00951541	0.955343
KLHL10	4.87432e-68	0	1.25563e-38	0	0.62003	0.105987	0.322068	9.2494e-09	0.100789	0.00504065	0.0030716	0.955343
ITGA8	2.28915e-68	0	1.29103e-38	0	0.606568	0.105919	0.320815	9.75284e-09	0.100827	-0.00358649	0.00218573	0.955343
XRCC4	2.4876e-68	0	1.18589e-38	0	0.619154	0.105839	0.324789	8.82664e-09	0.100877	-0.00491934	0.00299845	0.955343
ACRBP	3.69145e-68	0	1.26101e-38	0	0.616736	0.103376	0.321019	9.51995e-09	0.100912	0.00465642	0.00283848	0.955343
DCLK2	4.03062e-68	0	1.18333e-38	0	0.616313	0.105772	0.323374	8.32923e-09	0.10092	0.00514568	0.00313681	0.955343
N4BP2L2	2.60955e-68	0	1.1999e-38	0	0.614079	0.107892	0.317576	9.39113e-09	0.100998	-0.00547811	0.00334022	0.955343
TUBB2A	3.61429e-68	0	1.24789e-38	0	0.618158	0.106918	0.326138	9.26645e-09	0.101003	0.0262183	0.0159866	0.955343
EIF2AK1	2.49758e-68	0	1.22003e-38	0	0.617009	0.10392	0.322792	8.54973e-09	0.101105	-0.00619457	0.00377826	0.955343
AIFM3	2.17659e-68	0	1.25045e-38	0	0.616322	0.105107	0.318396	9.23203e-09	0.10113	-0.00207069	0.00126307	0.955343
CCDC14	3.7576e-68	0	1.24502e-38	0	0.616004	0.104317	0.321634	8.92344e-09	0.101137	0.00344196	0.00209955	0.955343
MPV17L2	3.82163e-68	0	1.28708e-38	0	0.617869	0.105922	0.322831	8.80152e-09	0.101142	0.0155845	0.00950648	0.955343
SNX33	2.35638e-68	0	1.19898e-38	0	0.613321	0.105011	0.319231	9.25264e-09	0.101191	-0.00584662	0.00356693	0.955343
LRRC32	3.5848e-68	0	1.12777e-38	0	0.611459	0.104785	0.321706	8.41943e-09	0.101271	0.00529521	0.00323128	0.955343
TBC1D2	5.91306e-68	0	1.16759e-38	0	0.62616	0.10624	0.318384	8.43293e-09	0.101335	0.00232347	0.00141811	0.955343
BASP1	2.45881e-68	0	1.20363e-38	0	0.618197	0.104998	0.318021	8.29777e-09	0.10152	-0.00636732	0.00388835	0.955343
ZFAT	2.2401e-68	0	1.32573e-38	0	0.614148	0.104676	0.326745	8.43048e-09	0.101566	-0.00277498	0.00169483	0.955343
RNF167	4.85404e-68	0	1.46575e-38	0	0.615205	0.106492	0.320717	9.3644e-09	0.101582	0.00484323	0.00295816	0.955343
SPN	3.95581e-68	0	1.33686e-38	0	0.613064	0.10575	0.322596	9.20924e-09	0.101586	0.00809852	0.0049465	0.955343
GALNT7	2.34192e-68	0	1.22187e-38	0	0.616768	0.106384	0.321474	9.56539e-09	0.101607	-0.00373441	0.00228108	0.955343
CD68	3.64209e-68	0	1.17219e-38	0	0.618392	0.104421	0.320613	8.80519e-09	0.101656	0.00823322	0.0050298	0.955343
LYPD8	3.67992e-68	0	1.31452e-38	0	0.614877	0.106605	0.323499	8.83269e-09	0.10176	0.0235655	0.0144009	0.955343
TMEM155	4.42922e-68	0	1.28071e-38	0	0.615963	0.104477	0.320586	9.04025e-09	0.101854	0.0077536	0.00473953	0.955343
MMP24	2.46728e-68	0	1.2161e-38	0	0.615423	0.107842	0.32143	9.60629e-09	0.101905	-0.00431794	0.00263982	0.955343
ERN1	4.87233e-68	0	1.27398e-38	0	0.618924	0.105569	0.319082	9.06522e-09	0.101916	0.00458462	0.00280294	0.955343
BCAR1	2.33159e-68	0	1.37295e-38	0	0.615032	0.104768	0.320212	9.10234e-09	0.101922	-0.0022131	0.00135307	0.955343
ABHD1	4.1805e-68	0	1.20751e-38	0	0.615355	0.105526	0.319994	1.00436e-08	0.101989	0.00378342	0.0023136	0.955343
OR11H4	4.6643e-68	0	1.32885e-38	0	0.614695	0.10562	0.319829	9.40195e-09	0.101996	0.00364244	0.00222743	0.955343
TMEM222	4.08061e-68	0	1.32706e-38	0	0.61333	0.106856	0.320199	8.14348e-09	0.102162	0.00732087	0.00447904	0.955343
ZFP91	2.15571e-68	0	1.40717e-38	0	0.614177	0.10396	0.319923	8.46115e-09	0.102254	-0.00398903	0.00244122	0.955343
MUC6	5.63071e-68	0	1.10953e-38	0	0.616342	0.104646	0.322897	8.92208e-09	0.102261	0.00210595	0.00128883	0.955343
TRPS1	2.69339e-68	0	1.27673e-38	0	0.616141	0.105986	0.32055	9.00278e-09	0.102294	-0.00523194	0.00320223	0.955343
KRT12	2.17551e-68	0	1.26148e-38	0	0.614272	0.105519	0.322725	8.77492e-09	0.102351	-0.00309099	0.00189216	0.955343
GRAP	3.06566e-68	0	1.27738e-38	0	0.615986	0.106061	0.322624	9.06636e-09	0.102413	-0.0139502	0.00854123	0.955343
COL5A1	2.04539e-68	0	1.30888e-38	0	0.614114	0.106619	0.318596	8.84576e-09	0.102463	-0.00195491	0.0011971	0.955343
DEFB132	2.75083e-68	0	1.28139e-38	0	0.612883	0.107069	0.318833	8.58218e-09	0.102559	-0.0158825	0.00972844	0.955343
ZYX	2.4984e-68	0	1.23199e-38	0	0.61458	0.106821	0.325886	9.29318e-09	0.102566	-0.00520251	0.00318674	0.955343
ICMT	4.67352e-68	0	1.19291e-38	0	0.621802	0.107052	0.321741	8.50025e-09	0.102568	0.0106438	0.00651976	0.955343
KPNA7	2.20824e-68	0	1.26155e-38	0	0.616339	0.104995	0.317768	9.39909e-09	0.102578	-0.00282584	0.001731	0.955343
PTK7	2.32238e-68	0	1.16385e-38	0	0.619836	0.105346	0.321462	9.68637e-09	0.102672	-0.00386317	0.00236707	0.955343
IFNA6	4.35015e-68	0	1.44642e-38	0	0.615134	0.106287	0.318805	9.11951e-09	0.102675	-0.0085265	0.00522447	0.955343
PRB4	3.49144e-68	0	1.16593e-38	0	0.619423	0.106971	0.32578	8.46649e-09	0.102706	0.0118249	0.00724619	0.955343
PMM2	2.31698e-68	0	1.27642e-38	0	0.614575	0.105141	0.318576	1.03969e-08	0.102757	-0.00246601	0.00151136	0.955343
IFT122	5.23657e-68	0	1.36415e-38	0	0.614397	0.106112	0.320866	9.95902e-09	0.102858	0.00232419	0.00142487	0.955343
DNAH6	6.10886e-68	0	1.24836e-38	0	0.613302	0.106402	0.322353	8.69924e-09	0.102887	0.0013433	0.000823593	0.955343
RNF149	4.27617e-68	0	1.16983e-38	0	0.615537	0.104649	0.316816	8.35629e-09	0.102948	0.00448978	0.00275322	0.955343
[truncated: 14,384 more rows]

## Sheet: Table S4 albumin
Table S4. The summary statitics for the association analysis of albumin
genes	const_pval	sex	age	bmi	PC1	PC2	PC3	PC4	p_value	beta_coef	std_err	fdr_bh_adj_pval
FCGRT	0	0	0	0	0.48646	0.0546425	0.731154	9.403e-22	1.38746e-78	-0.00881298	0.000469272	2.57457e-74
ALB	0	0	0	0	0.50152	0.0518686	0.709064	9.57331e-23	9.45075e-20	-0.00716504	0.000787669	8.76841e-16
IQGAP2	0	0	0	0	0.495565	0.0530768	0.727584	1.37111e-22	9.89342e-11	-0.00186794	0.000288749	6.11941e-07
SNX8	0	0	0	0	0.471654	0.0541861	0.73125	1.47045e-22	5.96397e-10	-0.0021304	0.000344066	2.76668e-06
TNFRSF13B	0	0	0	0	0.47383	0.0485621	0.758822	2.99852e-22	5.81496e-09	0.00213284	0.000366318	2.15805e-05
SERPINF2	0	0	0	0	0.476198	0.0505938	0.751362	1.48265e-22	1.89657e-08	0.00625554	0.00111278	5.86545e-05
SERPINA1	0	0	0	0	0.468978	0.0534453	0.759537	2.47016e-22	4.83062e-06	0.00177379	0.000387951	0.0128053
CINP	0	0	0	0	0.492656	0.0531913	0.755407	1.74423e-22	6.80004e-06	-0.00544768	0.00121059	0.0157727
STAB1	0	0	0	0	0.483028	0.0551572	0.757176	2.02588e-22	1.78109e-05	0.000886054	0.000206498	0.0352597
MOB3A	0	0	0	0	0.466552	0.0504815	0.754504	1.09536e-22	1.93309e-05	-0.00209939	0.000491358	0.0352597
BRIP1	0	0	0	0	0.488909	0.0515561	0.751709	2.39936e-22	2.0902e-05	-0.0012578	0.000295593	0.0352597
ABCA6	0	0	0	0	0.48313	0.0499782	0.744243	1.66201e-22	3.47275e-05	-0.00165175	0.000398958	0.0537003
HNF4A	0	0	0	0	0.494581	0.0536388	0.749299	1.16752e-22	5.52352e-05	-0.00266159	0.000660048	0.0788418
FLOT1	0	0	0	0	0.480826	0.0531302	0.759802	1.16253e-22	9.39321e-05	-0.0027072	0.000693109	0.1245
PIK3C3	0	0	0	0	0.484823	0.052327	0.747388	1.67752e-22	0.000115834	0.00197911	0.000513402	0.143294
OMA1	0	0	0	0	0.471228	0.0504876	0.762919	1.91214e-22	0.000136932	0.00204706	0.000536756	0.158807
USP16	0	0	0	0	0.476819	0.0512784	0.760516	1.5384e-22	0.000165733	0.00213813	0.000567696	0.180902
ZFAT	0	0	0	0	0.485433	0.051706	0.773269	1.75927e-22	0.000232836	-0.00126929	0.000344865	0.231224
COL4A4	0	0	0	0	0.470907	0.0520882	0.756368	1.25078e-22	0.000236757	-0.00160189	0.000435736	0.231224
WFIKKN2	0	0	0	0	0.472134	0.0519561	0.759336	1.3946e-22	0.000263549	0.00191022	0.000523516	0.244521
CD36	0	0	0	0	0.468811	0.0505253	0.757642	1.81113e-22	0.00032339	0.00177882	0.00049468	0.269354
PRR30	0	0	0	0	0.470351	0.054887	0.764562	1.51089e-22	0.00032424	-0.00155485	0.000432477	0.269354
ICMT	0	0	0	0	0.467487	0.0546621	0.755821	1.80198e-22	0.000333862	0.00473979	0.00132116	0.269354
BTN3A3	0	0	0	0	0.481557	0.0547189	0.754907	7.05731e-23	0.000362901	-0.00155446	0.000435938	0.280583
FNDC3A	0	0	0	0	0.480312	0.0517318	0.744578	1.22216e-22	0.000424692	-0.00215272	0.000610818	0.315223
PABPC1L2A	0	0	0	0	0.482837	0.0514148	0.756883	1.53191e-22	0.000548669	0.0494846	0.014319	0.391581
COL17A1	0	0	0	0	0.494476	0.0532536	0.759446	1.48315e-22	0.00063947	-0.0010189	0.000298415	0.416843
AQP2	0	0	0	0	0.466905	0.052054	0.756031	1.78703e-22	0.000645312	-0.00261979	0.00076784	0.416843
MET	0	0	0	0	0.486047	0.0558172	0.752661	1.33032e-22	0.000668812	-0.00141106	0.000414757	0.416843
DPF1	0	0	0	0	0.464623	0.0522299	0.760357	1.48414e-22	0.000673921	-0.00319287	0.000939065	0.416843
CTNND2	0	0	0	0	0.474533	0.0518175	0.756222	1.18668e-22	0.000728137	-0.00153625	0.000454669	0.435849
NMUR2	0	0	0	0	0.472405	0.0507674	0.748712	1.51243e-22	0.000793086	0.00179207	0.000534107	0.459891
ZBTB5	0	0	0	0	0.481698	0.0529549	0.762345	1.51908e-22	0.000885108	0.00207054	0.000622758	0.497699
PIK3R4	0	0	0	0	0.490764	0.0545101	0.748867	1.64337e-22	0.000932751	0.00133425	0.00040308	0.498252
SORL1	0	0	0	0	0.491348	0.0521458	0.760044	1.93712e-22	0.00095	-0.000906489	0.000274278	0.498252
HIST1H2AJ	0	0	0	0	0.479692	0.0523247	0.74262	1.71157e-22	0.000966645	-0.00411833	0.00124793	0.498252
KRTAP22-2	0	0	0	0	0.477123	0.0513575	0.746436	1.43222e-22	0.00100155	0.0506079	0.0153816	0.502289
CLCN3	0	0	0	0	0.479255	0.0537998	0.750444	1.48496e-22	0.00103556	-0.00184541	0.000562496	0.503437
UBA3	0	0	0	0	0.474606	0.0539648	0.752973	1.30801e-22	0.0010581	-0.00289838	0.00088509	0.503437
IQCF2	0	0	0	0	0.476515	0.0515104	0.74735	1.37186e-22	0.00111234	-0.00408982	0.00125434	0.516016
AP3S2	0	0	0	0	0.475522	0.0515847	0.758712	1.53514e-22	0.00114694	0.00810785	0.00249332	0.519089
MFSD14A	0	0	0	0	0.483866	0.0542457	0.757867	1.74163e-22	0.00125091	-0.00297267	0.000921163	0.534732
ABCD4	0	0	0	0	0.481966	0.0524233	0.754601	1.44489e-22	0.00127228	-0.00081613	0.000253281	0.534732
PTEN	0	0	0	0	0.485109	0.0520084	0.741716	1.27867e-22	0.00129208	-0.00644094	0.00200166	0.534732
MS4A10	0	0	0	0	0.478187	0.0522969	0.754719	1.58693e-22	0.00129677	0.00283999	0.000882873	0.534732
GRIK5	0	0	0	0	0.475228	0.0519959	0.769317	2.06949e-22	0.00132966	0.00129758	0.000404286	0.536208
RASGEF1A	0	0	0	0	0.471935	0.0515231	0.759966	1.32865e-22	0.00141965	-0.00491221	0.00153954	0.536208
PLIN1	0	0	0	0	0.47378	0.0541204	0.750514	1.18795e-22	0.001422	0.00117736	0.000369055	0.536208
PLA2G15	0	0	0	0	0.480438	0.0532774	0.752364	1.19874e-22	0.00142403	-0.00157593	0.000494053	0.536208
AFG1L	0	0	0	0	0.48531	0.0523827	0.75583	1.48576e-22	0.00144484	0.00192021	0.000602776	0.536208
BLK	0	0	0	0	0.484792	0.0526874	0.753839	1.41951e-22	0.00153885	-0.000844392	0.000266595	0.5599
KCNK13	0	0	0	0	0.482805	0.0529942	0.751201	1.51856e-22	0.00158976	-0.00176687	0.000559519	0.5673
SLC24A2	0	0	0	0	0.484512	0.052867	0.756332	1.73198e-22	0.00168697	0.00164199	0.000522844	0.590629
AGPAT2	0	0	0	0	0.48383	0.0539341	0.757487	1.15294e-22	0.00177727	-0.00176	0.000563166	0.605397
SMARCA1	0	0	0	0	0.478989	0.0525621	0.756317	1.3933e-22	0.00181187	-0.00384959	0.00123403	0.605397
RNF145	0	0	0	0	0.473777	0.051607	0.754921	1.23533e-22	0.00182702	-0.00346491	0.00111159	0.605397
LIPA	0	0	0	0	0.480235	0.0524549	0.758341	1.7263e-22	0.00192445	0.00318272	0.00102612	0.621748
PDE8A	0	0	0	0	0.477764	0.0523514	0.754676	1.39751e-22	0.00198026	0.00209643	0.000677746	0.621748
MMP7	0	0	0	0	0.478698	0.0515763	0.754722	1.3572e-22	0.00198896	-0.00409636	0.00132485	0.621748
CYCS	0	0	0	0	0.483748	0.0535413	0.761815	1.57531e-22	0.00205128	0.013687	0.00443985	0.621748
PCDHGA5	0	0	0	0	0.489744	0.0538553	0.760057	1.60502e-22	0.00207064	-0.0018432	0.000598447	0.621748
FAF1	0	0	0	0	0.469768	0.0527132	0.757057	1.65803e-22	0.00207741	0.00185726	0.000603203	0.621748
ARHGEF12	0	0	0	0	0.474675	0.054019	0.759114	1.09794e-22	0.00215292	-0.00112653	0.000367146	0.634119
TNFRSF17	0	0	0	0	0.47781	0.0516168	0.767291	1.62762e-22	0.00219177	0.00302838	0.000988698	0.635478
SLC24A3	0	0	0	0	0.46532	0.0549564	0.765836	1.87217e-22	0.00232374	0.00130079	0.000427125	0.640434
IMPDH2	0	0	0	0	0.475747	0.052458	0.74932	1.29432e-22	0.00239983	-0.00270984	0.000892643	0.640434
SESN1	0	0	0	0	0.483436	0.0524706	0.759689	1.79526e-22	0.00241665	0.00191122	0.000630007	0.640434
C20orf27	0	0	0	0	0.473582	0.0548871	0.752407	1.36747e-22	0.00242	0.00335972	0.00110764	0.640434
RORC	0	0	0	0	0.474234	0.0534319	0.744352	1.666e-22	0.00242877	0.00100994	0.000333077	0.640434
TMEM150B	0	0	0	0	0.474495	0.0521239	0.747253	1.51282e-22	0.0024698	-0.00179932	0.00059441	0.640434
VEGFC	0	0	0	0	0.473807	0.0527531	0.762752	1.36559e-22	0.00247022	-0.000860815	0.000284377	0.640434
LSP1	0	0	0	0	0.47604	0.0529197	0.761807	1.472e-22	0.00248498	0.00175674	0.000580698	0.640434
CARS	0	0	0	0	0.480699	0.0521098	0.750667	1.36177e-22	0.002523	-0.000893362	0.000295754	0.641327
EIF2AK3	0	0	0	0	0.478004	0.0533524	0.753992	1.35435e-22	0.0025695	-0.00133129	0.000441541	0.64432
BNIP1	0	0	0	0	0.474269	0.0530597	0.753647	1.36015e-22	0.00266044	-0.0021913	0.000729333	0.646925
SCARB1	0	0	0	0	0.481303	0.0543692	0.757454	1.63541e-22	0.00271636	-0.00153534	0.000512089	0.646925
OTUD1	0	0	0	0	0.475606	0.0545231	0.755572	1.66211e-22	0.00273081	0.00241785	0.00080687	0.646925
TRMT2A	0	0	0	0	0.472131	0.0523416	0.747978	1.4309e-22	0.00273719	0.00142806	0.000476679	0.646925
C7orf31	0	0	0	0	0.489395	0.0535913	0.75161	2.12221e-22	0.0027718	-0.00174028	0.00058164	0.646925
VSIG10	0	0	0	0	0.482582	0.0531968	0.759285	1.65945e-22	0.00284966	0.0011535	0.000386618	0.646925
KRTAP5-2	0	0	0	0	0.477794	0.0527003	0.758986	1.27417e-22	0.0028668	0.00726538	0.00243664	0.646925
ATP6V0E1	0	0	0	0	0.481468	0.0527204	0.751528	1.50392e-22	0.00300886	0.00646037	0.00217749	0.646925
WDR49	0	0	0	0	0.482523	0.0531523	0.765125	1.26935e-22	0.00303126	0.00142449	0.000480499	0.646925
SNX9	0	0	0	0	0.483003	0.0514855	0.756281	1.42687e-22	0.00303466	0.00109054	0.000367897	0.646925
FBXO44	0	0	0	0	0.473731	0.0526801	0.756994	1.68179e-22	0.00304785	-0.00157795	0.000532564	0.646925
ERI3	0	0	0	0	0.47164	0.052938	0.760298	3.27925e-22	0.00305897	-0.00298247	0.00100698	0.646925
INPP1	0	0	0	0	0.47792	0.0518843	0.750187	1.26495e-22	0.00305954	0.0028369	0.000957848	0.646925
GNAL	0	0	0	0	0.482165	0.0519467	0.763387	1.6965e-22	0.0030757	0.00319641	0.00107982	0.646925
GLIS1	0	0	0	0	0.474486	0.0535472	0.7551	1.01561e-22	0.00310284	0.00110867	0.000374879	0.646925
BCL6B	0	0	0	0	0.477475	0.0521764	0.759412	1.61774e-22	0.0032801	-0.0023202	0.000789119	0.654167
UNC45B	0	0	0	0	0.483477	0.054601	0.759826	1.214e-22	0.00335964	0.000692942	0.000236272	0.654167
SMG6	0	0	0	0	0.476718	0.0536409	0.771435	1.72393e-22	0.00337573	0.00116579	0.0003977	0.654167
IFT172	0	0	0	0	0.478009	0.053234	0.745174	1.6552e-22	0.00343957	0.00070633	0.000241439	0.654167
SLC34A2	0	0	0	0	0.472145	0.0519572	0.748832	1.04365e-22	0.00346578	-0.001577	0.000539488	0.654167
WDR27	0	0	0	0	0.476836	0.0524616	0.768255	1.87261e-22	0.00350175	-0.000914703	0.000313263	0.654167
RRNAD1	0	0	0	0	0.480212	0.0531666	0.760357	1.32856e-22	0.00350823	-0.00148799	0.000509698	0.654167
SLC25A44	0	0	0	0	0.48863	0.0531122	0.757543	1.91031e-22	0.00357707	-0.00166446	0.000571334	0.654167
TPPP	0	0	0	0	0.475741	0.0542107	0.763093	1.63374e-22	0.00357983	-0.00348124	0.00119505	0.654167
TAF15	0	0	0	0	0.474236	0.0525734	0.759181	1.46697e-22	0.00359824	0.00173234	0.000595011	0.654167
ABCC4	0	0	0	0	0.480112	0.0534455	0.75432	1.62193e-22	0.00360544	0.000910273	0.000312721	0.654167
MEI4	0	0	0	0	0.489371	0.0530726	0.755808	1.77289e-22	0.00360669	-0.00252835	0.000868637	0.654167
MARCKSL1	0	0	0	0	0.487395	0.0528259	0.766347	1.7161e-22	0.00362577	0.00521845	0.00179386	0.654167
IFNA6	0	0	0	0	0.483235	0.0534444	0.747178	1.35505e-22	0.0036535	-0.00309838	0.00106595	0.654167
NEDD9	0	0	0	0	0.487582	0.0521537	0.758887	1.72763e-22	0.00366638	-0.0012724	0.000437916	0.654167
DDIAS	0	0	0	0	0.488247	0.05305	0.75267	1.31188e-22	0.00376445	-0.00158378	0.000546639	0.660548
RECK	0	0	0	0	0.477041	0.0548345	0.757031	1.21362e-22	0.00380735	-0.00148162	0.000512006	0.660548
RAB4B	0	0	0	0	0.478771	0.0546559	0.755005	1.50129e-22	0.00382566	-0.00231839	0.000801591	0.660548
EPS15	0	0	0	0	0.482299	0.0521105	0.762609	1.04099e-22	0.00389051	-0.00174956	0.000606023	0.660548
P4HA1	0	0	0	0	0.472319	0.0528506	0.758604	2.44527e-22	0.0038981	-0.0020396	0.000706637	0.660548
ASB17	0	0	0	0	0.482525	0.0518234	0.755223	1.46026e-22	0.00393088	-0.0032654	0.00113236	0.660548
FAM107B	0	0	0	0	0.47712	0.0538581	0.754272	1.71384e-22	0.00398101	-0.00238802	0.000829257	0.660548
CTAGE15	0	0	0	0	0.485831	0.0515496	0.755557	1.50412e-22	0.00398692	-0.00691645	0.00240217	0.660548
GTF2I	0	0	0	0	0.473533	0.0528595	0.743698	1.4188e-22	0.00402978	0.00311309	0.00108249	0.661739
RNASE3	0	0	0	0	0.48372	0.0520547	0.750304	1.89087e-22	0.00410986	0.00169719	0.000591426	0.662364
FAM168A	0	0	0	0	0.480836	0.0526309	0.762075	1.66105e-22	0.00414405	0.00266578	0.000929806	0.662364
RPH3A	0	0	0	0	0.481174	0.0521584	0.758354	1.49848e-22	0.00420055	-0.00148396	0.000518371	0.662364
C6orf62	0	0	0	0	0.475063	0.0529157	0.750197	1.47897e-22	0.00421172	0.00475337	0.00166091	0.662364
ZDHHC15	0	0	0	0	0.475354	0.0518114	0.757689	1.36257e-22	0.00424394	-0.0066541	0.00232703	0.662364
GDAP2	0	0	0	0	0.479804	0.0506707	0.756867	1.73118e-22	0.0042523	-0.00206417	0.000722026	0.662364
LRRC46	0	0	0	0	0.48653	0.0515689	0.753468	1.40166e-22	0.00428345	-0.00259215	0.000907443	0.662364
DNAH1	0	0	0	0	0.474146	0.0527399	0.753529	1.23571e-22	0.00432261	0.000404385	0.000141708	0.662895
ACER1	0	0	0	0	0.480051	0.0523289	0.759293	1.38921e-22	0.00441628	-0.00186	0.000653356	0.671709
PCDHGC5	0	0	0	0	0.484615	0.0542299	0.757662	2.00547e-22	0.00447104	-0.00225741	0.000794049	0.674508
RUNDC3A	0	0	0	0	0.480494	0.0497741	0.757128	1.62866e-22	0.00452206	-0.00281295	0.000990722	0.676704
TTR	0	0	0	0	0.485052	0.0535858	0.749645	1.48334e-22	0.00455906	-0.0013838	0.000487822	0.676783
NSMCE4A	0	0	0	0	0.475293	0.0515152	0.754104	1.68404e-22	0.00463993	-0.00164386	0.000580648	0.683321
ENAM	0	0	0	0	0.478079	0.0522868	0.746303	1.70138e-22	0.00473146	0.0019942	0.000705959	0.685057
OR5AU1	0	0	0	0	0.46868	0.0534223	0.75505	1.62666e-22	0.00475187	-0.00163084	0.000577608	0.685057
TLR9	0	0	0	0	0.48032	0.0528226	0.751384	1.18506e-22	0.00476592	-0.00201606	0.000714286	0.685057
DDX53	0	0	0	0	0.478226	0.0509134	0.745749	1.43313e-22	0.00485905	-0.00335737	0.00119213	0.685057
IFNA16	0	0	0	0	0.480554	0.0547852	0.749127	1.71103e-22	0.00486177	-0.00225075	0.000799245	0.685057
CHMP4A	0	0	0	0	0.476517	0.0543532	0.764253	1.21877e-22	0.00491144	-0.000805735	0.00028645	0.685057
DSN1	0	0	0	0	0.469987	0.0530811	0.758886	1.22239e-22	0.00494434	-0.00194498	0.000691995	0.685057
JAML	0	0	0	0	0.478388	0.0510875	0.766992	1.7694e-22	0.00494706	0.001368	0.000486745	0.685057
VWA2	0	0	0	0	0.474335	0.0535636	0.772355	1.7032e-22	0.0051004	0.00112356	0.000401175	0.689134
N4BP2	0	0	0	0	0.481449	0.0553084	0.773274	1.37675e-22	0.00511021	-0.00165414	0.000590752	0.689134
CIDEB	0	0	0	0	0.479039	0.0527473	0.758726	1.30834e-22	0.00513272	-0.00207095	0.000739988	0.689134
LCA5L	0	0	0	0	0.479448	0.0538996	0.759406	1.47063e-22	0.00516289	0.00144345	0.000516119	0.689134
COLGALT2	0	0	0	0	0.476218	0.0532518	0.760857	1.51585e-22	0.00526282	-0.000881947	0.000316049	0.689134
PLXNB1	0	0	0	0	0.4829	0.0540984	0.754583	1.58778e-22	0.00527318	-0.000846671	0.000303477	0.689134
CCDC121	0	0	0	0	0.483749	0.0531334	0.756717	1.7416e-22	0.00536596	-0.00290181	0.00104222	0.689134
SCAMP5	0	0	0	0	0.476715	0.052606	0.749797	1.41429e-22	0.00537545	-0.00467192	0.00167833	0.689134
NHLRC3	0	0	0	0	0.485704	0.0519392	0.766109	1.57778e-22	0.00548101	0.000938773	0.000338009	0.689134
FAM98C	0	0	0	0	0.478686	0.0523755	0.752604	1.41314e-22	0.00554926	-0.00146751	0.000529149	0.689134
GLIPR2	0	0	0	0	0.467485	0.0526027	0.757092	1.69011e-22	0.00558648	0.00260869	0.000941373	0.689134
LMCD1	0	0	0	0	0.485353	0.0532353	0.763601	1.47766e-22	0.00560165	0.0013627	0.000491901	0.689134
SHC1	0	0	0	0	0.478032	0.053497	0.762872	1.53127e-22	0.0056219	-0.00165594	0.000598008	0.689134
ACTL7A	0	0	0	0	0.469146	0.0532767	0.764328	1.21041e-22	0.00564597	-0.000955578	0.00034526	0.689134
ZMIZ1	0	0	0	0	0.473015	0.0539217	0.757651	1.24508e-22	0.00565727	-0.00171768	0.00062076	0.689134
POGLUT1	0	0	0	0	0.488702	0.0524428	0.747452	1.64975e-22	0.00571989	0.00206731	0.000748085	0.689134
ZNF33B	0	0	0	0	0.470395	0.0529761	0.746312	1.18431e-22	0.00582864	0.00177936	0.000645325	0.689134
GGTLC2	0	0	0	0	0.475968	0.051932	0.757211	1.29746e-22	0.00586281	-0.00219911	0.000798109	0.689134
VPS37D	0	0	0	0	0.486639	0.0526826	0.757187	1.89667e-22	0.00589742	0.00199615	0.000724958	0.689134
CEP250	0	0	0	0	0.480177	0.0529015	0.752464	1.35757e-22	0.00592857	0.000876026	0.000318352	0.689134
YBEY	0	0	0	0	0.481385	0.0527407	0.761368	1.19392e-22	0.0059296	-0.00227346	0.000826203	0.689134
AKAP14	0	0	0	0	0.483723	0.0518127	0.753121	1.36678e-22	0.00599279	-0.00827105	0.0030096	0.689134
MAP4K4	0	0	0	0	0.485227	0.0524507	0.755599	1.3697e-22	0.00603982	-0.00216743	0.000789405	0.689134
CLVS1	0	0	0	0	0.480031	0.0529917	0.755894	1.50453e-22	0.00607042	-0.00344742	0.00125635	0.689134
CUTA	0	0	0	0	0.478391	0.0539671	0.754137	1.72464e-22	0.00611564	0.00229105	0.000835673	0.689134
MLLT11	0	0	0	0	0.47742	0.055531	0.776087	1.82986e-22	0.00615189	0.0112427	0.00410376	0.689134
ACAD8	0	0	0	0	0.478689	0.0532984	0.767724	1.89706e-22	0.00615803	0.00151199	0.000551964	0.689134
MYLK	0	0	0	0	0.48102	0.0532653	0.76026	1.76163e-22	0.00621247	-0.000955143	0.000349052	0.689134
ATP4B	0	0	0	0	0.481576	0.0533807	0.765568	1.54642e-22	0.00621712	0.0018474	0.000675181	0.689134
DDX47	0	0	0	0	0.478361	0.0527954	0.753159	1.31432e-22	0.00621985	-0.0013962	0.000510306	0.689134
ANKFY1	0	0	0	0	0.480168	0.0539593	0.754279	1.31059e-22	0.00629354	0.00127279	0.000465862	0.689134
PIANP	0	0	0	0	0.476501	0.0534538	0.750291	1.51134e-22	0.00632008	-0.0026413	0.000967246	0.689134
F2RL3	0	0	0	0	0.480077	0.0527914	0.756166	1.69748e-22	0.00633177	-0.00169891	0.000622283	0.689134
TNKS2	0	0	0	0	0.480286	0.0537944	0.755169	1.25741e-22	0.00637956	-0.00129399	0.000474398	0.689134
FXYD1	0	0	0	0	0.473607	0.0521956	0.755311	9.59489e-23	0.00642176	0.000988754	0.000362782	0.689134
P2RY4	0	0	0	0	0.477823	0.0528188	0.761303	1.47185e-22	0.00642207	-0.00159442	0.000585009	0.689134
ABTB2	0	0	0	0	0.477082	0.0533976	0.761904	1.42548e-22	0.00648209	-0.00119599	0.000439317	0.689134
ZBED6	0	0	0	0	0.472448	0.0521406	0.763657	1.98115e-22	0.00655363	0.00242432	0.000891701	0.689134
RAB27B	0	0	0	0	0.476717	0.0536912	0.744454	1.6835e-22	0.00655718	0.00349122	0.00128421	0.689134
ADAMTS1	0	0	0	0	0.481557	0.0527285	0.746938	1.16376e-22	0.00658957	0.000616297	0.000226834	0.689134
TRIM31	0	0	0	0	0.47876	0.0517227	0.758836	2.13201e-22	0.00665743	0.000821358	0.000302687	0.689134
LZTFL1	0	0	0	0	0.480886	0.0540057	0.760803	1.38935e-22	0.00668951	0.00397159	0.00146447	0.689134
GPR160	0	0	0	0	0.469149	0.053336	0.756141	1.3992e-22	0.00669498	-0.00303276	0.0011184	0.689134
GBE1	0	0	0	0	0.471032	0.0525239	0.762804	1.22059e-22	0.00673636	0.000805063	0.00029711	0.689134
ZCCHC6	0	0	0	0	0.480517	0.0515424	0.765007	1.82469e-22	0.00674561	0.000995248	0.00036736	0.689134
NDUFA1	0	0	0	0	0.485395	0.0536928	0.752561	1.43439e-22	0.00675279	0.0202568	0.00747803	0.689134
LRIF1	0	0	0	0	0.466257	0.0524427	0.752217	1.66e-22	0.00677103	-0.00151774	0.000560478	0.689134
RPUSD4	0	0	0	0	0.480684	0.0538068	0.75776	1.68057e-22	0.00679282	0.00189359	0.000699548	0.689134
MIER2	0	0	0	0	0.476244	0.0526624	0.752948	1.49126e-22	0.00679626	-0.00137772	0.000509001	0.689134
SNW1	0	0	0	0	0.483589	0.0539914	0.757658	1.50859e-22	0.00686784	-0.00355465	0.00131496	0.691035
ASPRV1	0	0	0	0	0.474044	0.051128	0.751562	2.00418e-22	0.00692596	0.00254215	0.000941389	0.691035
RNF220	0	0	0	0	0.480966	0.0533936	0.754899	1.65159e-22	0.00696816	0.00213403	0.000790848	0.691035
OR5H1	0	0	0	0	0.474249	0.0527174	0.764419	1.52466e-22	0.0069832	-0.00378258	0.00140216	0.691035
UBXN4	0	0	0	0	0.479617	0.0525642	0.760452	1.84854e-22	0.00700857	0.00245224	0.000909423	0.691035
FBXO22	0	0	0	0	0.480131	0.0543762	0.752234	1.09957e-22	0.00705469	-0.00160548	0.00059588	0.691035
MFAP1	0	0	0	0	0.476694	0.0538634	0.755353	1.15259e-22	0.00711054	-0.00262237	0.000974256	0.691035
CDA	0	0	0	0	0.478507	0.0526341	0.757745	1.23729e-22	0.00711294	-0.00236238	0.000877701	0.691035
C10orf35	0	0	0	0	0.479071	0.0526293	0.765239	1.86005e-22	0.00723573	0.00267984	0.000997766	0.699303
DSCAML1	0	0	0	0	0.483833	0.0528499	0.755418	1.39174e-22	0.00735609	-0.000700016	0.000261169	0.707252
DCLK3	0	0	0	0	0.478625	0.053848	0.758135	1.85656e-22	0.00748566	-0.00181603	0.000679023	0.709822
EEF1A1	0	0	0	0	0.469554	0.0533675	0.757606	1.49647e-22	0.00750824	0.00650171	0.00243195	0.709822
GRHL1	0	0	0	0	0.483852	0.0534067	0.763133	1.54975e-22	0.00753314	-0.00187702	0.000702386	0.709822
SLC46A3	0	0	0	0	0.479892	0.0532973	0.752769	1.24733e-22	0.00755148	0.00118796	0.000444675	0.709822
ASS1	0	0	0	0	0.475353	0.0523735	0.758772	1.32248e-22	0.00757409	-0.00166219	0.000622421	0.709822
CALCR	0	0	0	0	0.479322	0.0533416	0.746081	1.29104e-22	0.00762636	-0.00171251	0.000641818	0.711129
HOXB9	0	0	0	0	0.479341	0.0526231	0.757092	1.0957e-22	0.00771392	-0.00168026	0.000630639	0.714935
PPP1R18	0	0	0	0	0.480438	0.0517258	0.757241	1.99655e-22	0.00776441	0.000937816	0.000352273	0.714935
EMILIN1	0	0	0	0	0.477736	0.0521778	0.751129	1.41102e-22	0.00778276	0.00147816	0.000555409	0.714935
FUBP3	0	0	0	0	0.477889	0.0532259	0.755588	1.34822e-22	0.00784267	0.00203434	0.000765133	0.71689
ZCCHC7	0	0	0	0	0.480856	0.0538628	0.762882	1.63167e-22	0.00788431	0.00236318	0.000889407	0.717163
BEX1	0	0	0	0	0.477555	0.0531027	0.748209	1.48528e-22	0.00794633	-0.00674973	0.00254286	0.71783
LY6G6C	0	0	0	0	0.47449	0.0525867	0.753382	1.67453e-22	0.00800595	0.00118973	0.000448639	0.71783
SNX15	0	0	0	0	0.476918	0.0523617	0.752262	1.59011e-22	0.008051	-0.00182624	0.000689155	0.71783
TPRKB	0	0	0	0	0.475748	0.0528639	0.76239	1.44485e-22	0.00807719	-0.00779023	0.00294097	0.71783
GSN	0	0	0	0	0.477727	0.0537663	0.769651	1.8632e-22	0.00814831	-0.000649548	0.000245492	0.71783
NAALADL2	0	0	0	0	0.475265	0.0533646	0.758532	1.58061e-22	0.00815427	0.00142338	0.000538005	0.71783
RTN4IP1	0	0	0	0	0.479741	0.0513377	0.756234	1.5519e-22	0.00820442	0.00192602	0.000728564	0.71783
TOMM5	0	0	0	0	0.476915	0.0538817	0.751192	1.58449e-22	0.00824109	0.00727888	0.00275499	0.71783
ZNF318	0	0	0	0	0.466111	0.0516742	0.755119	1.75698e-22	0.00831445	0.00080839	0.000306317	0.71783
TRIM2	0	0	0	0	0.481406	0.0514531	0.750866	9.99086e-23	0.00838036	-0.00143351	0.000543741	0.71783
NSUN4	0	0	0	0	0.478954	0.0533851	0.762796	1.69425e-22	0.0083832	-0.00167563	0.000635605	0.71783
BMX	0	0	0	0	0.481244	0.0527896	0.753641	1.51555e-22	0.00838418	-0.00153635	0.000582781	0.71783
AGBL1	0	0	0	0	0.467587	0.0538861	0.756366	1.5479e-22	0.00846831	0.000729585	0.000277109	0.71783
DNAAF4	0	0	0	0	0.484447	0.0532913	0.77303	2.10904e-22	0.00847983	-0.00106362	0.000404052	0.71783
HSBP1L1	0	0	0	0	0.476547	0.0542167	0.758609	1.30551e-22	0.00855176	-0.00452734	0.00172174	0.71783
CBFB	0	0	0	0	0.479887	0.0523902	0.754381	1.57762e-22	0.00856513	-0.0042941	0.00163337	0.71783
DDX27	0	0	0	0	0.478199	0.0539227	0.756148	1.49421e-22	0.00862202	-0.00184923	0.000704006	0.71783
CNTN2	0	0	0	0	0.479701	0.0529656	0.757173	1.34226e-22	0.00863558	-0.000901708	0.000343352	0.71783
PHPT1	0	0	0	0	0.474993	0.052644	0.754614	1.47689e-22	0.00864202	-0.00407979	0.00155365	0.71783
TRIM7	0	0	0	0	0.479816	0.0528882	0.755827	1.73919e-22	0.00869005	0.00137801	0.000525146	0.71783
TRAPPC1	0	0	0	0	0.476379	0.0527585	0.754578	1.61956e-22	0.00870402	-0.00421432	0.00160637	0.71783
JAM2	0	0	0	0	0.48769	0.0529557	0.751938	1.34248e-22	0.00884182	0.00281899	0.00107671	0.725968
RASA3	0	0	0	0	0.476894	0.051728	0.754331	1.30321e-22	0.00890383	-0.00121812	0.000465684	0.727839
BCAR3	0	0	0	0	0.471525	0.0539032	0.750487	1.43483e-22	0.00904202	-0.000570934	0.000218707	0.731865
MALT1	0	0	0	0	0.48605	0.0538727	0.744772	1.47421e-22	0.00905937	0.00185776	0.000711827	0.731865
BORCS8	0	0	0	0	0.483044	0.0530531	0.76824	1.41978e-22	0.0090714	-0.00314762	0.00120627	0.731865
TBC1D16	0	0	0	0	0.482521	0.0527073	0.752341	1.84662e-22	0.00918298	0.00107742	0.000413566	0.733459
PRR23A	0	0	0	0	0.486292	0.0541948	0.757461	1.62844e-22	0.00924476	-0.00644055	0.00247437	0.733459
ABCC1	0	0	0	0	0.480923	0.0515636	0.761333	1.79627e-22	0.00928138	-0.00078075	0.00030011	0.733459
ALS2CL	0	0	0	0	0.486838	0.0524947	0.758728	1.68192e-22	0.00932418	0.000816472	0.000314031	0.733459
KIAA2022	0	0	0	0	0.483489	0.0527014	0.757186	1.654e-22	0.00941428	-0.0029994	0.0011551	0.733459
GANC	0	0	0	0	0.479104	0.0526682	0.760647	1.20301e-22	0.00944747	-0.000814567	0.000313843	0.733459
FABP6	0	0	0	0	0.48552	0.0537976	0.754607	1.49173e-22	0.0095067	-0.00184217	0.000710355	0.733459
OR2T35	0	0	0	0	0.474495	0.0535272	0.761679	1.37081e-22	0.00954235	-0.00260332	0.00100436	0.733459
GUCD1	0	0	0	0	0.47448	0.0526761	0.761624	1.57069e-22	0.00957146	0.00265872	0.00102615	0.733459
CCDC103	0	0	0	0	0.485415	0.0547106	0.752889	1.58741e-22	0.00962123	0.00260312	0.00100538	0.733459
ELOVL5	0	0	0	0	0.47819	0.051904	0.750629	1.73876e-22	0.00968277	0.00209583	0.000810141	0.733459
ESCO1	0	0	0	0	0.481351	0.053589	0.754346	1.63883e-22	0.00982186	0.0016813	0.000651144	0.733459
FSBP	0	0	0	0	0.488597	0.0521633	0.748177	1.46111e-22	0.0098231	0.00316282	0.00122493	0.733459
FGFBP1	0	0	0	0	0.481742	0.0529637	0.756875	1.63344e-22	0.00983353	-0.0024604	0.000953027	0.733459
HPN	0	0	0	0	0.479367	0.0540981	0.753487	1.56082e-22	0.0098529	-0.00260886	0.0010108	0.733459
MAP3K10	0	0	0	0	0.479623	0.053687	0.754115	1.62512e-22	0.00986658	-0.00119791	0.000464216	0.733459
OR7D2	0	0	0	0	0.477829	0.0535931	0.752377	1.40718e-22	0.00989879	-0.00296653	0.00115009	0.733459
AGFG1	0	0	0	0	0.48864	0.0520847	0.75793	1.76404e-22	0.00990652	0.00252991	0.000980924	0.733459
PPM1B	0	0	0	0	0.47999	0.0530745	0.754218	1.60533e-22	0.0099264	0.00206121	0.000799409	0.733459
HSDL1	0	0	0	0	0.476229	0.0531695	0.75872	1.76073e-22	0.0100228	-0.00252355	0.000979989	0.733459
STK36	0	0	0	0	0.474888	0.0533054	0.7592	1.56564e-22	0.0100721	-0.000896347	0.000348315	0.733459
KIF4A	0	0	0	0	0.478972	0.0518884	0.761484	1.50263e-22	0.0100765	-0.0031403	0.00122037	0.733459
HSF4	0	0	0	0	0.481654	0.0531116	0.759353	1.69906e-22	0.0101054	-0.00157618	0.000612764	0.733459
ESRRG	0	0	0	0	0.485232	0.0534736	0.757307	1.58519e-22	0.0101313	-0.00291746	0.0011346	0.733459
CCDC157	0	0	0	0	0.48417	0.0527311	0.746506	1.46984e-22	0.0101411	-0.00110164	0.000428483	0.733459
MRM1	0	0	0	0	0.477899	0.0524481	0.75757	1.33327e-22	0.0103487	-0.00230521	0.000899069	0.733459
GJA9	0	0	0	0	0.482157	0.0530002	0.749196	1.7113e-22	0.0103555	0.00117987	0.000460212	0.733459
SYCP1	0	0	0	0	0.48027	0.0535224	0.766158	2.11967e-22	0.0104317	-0.000850639	0.000332123	0.733459
PHAX	0	0	0	0	0.480413	0.0530767	0.752814	1.42867e-22	0.0104449	-0.00199776	0.000780138	0.733459
ICE2	0	0	0	0	0.478027	0.0528369	0.759174	1.67941e-22	0.0104628	0.00149992	0.000585864	0.733459
MUSTN1	0	0	0	0	0.481726	0.052804	0.759389	1.67128e-22	0.0105025	-0.00837071	0.00327126	0.733459
SERP2	0	0	0	0	0.481431	0.051662	0.752747	1.28082e-22	0.0105614	0.0103628	0.00405284	0.733459
FUT6	0	0	0	0	0.481337	0.0541199	0.750413	1.70705e-22	0.0105982	-0.00169693	0.000663974	0.733459
C1QTNF5	0	0	0	0	0.481657	0.0530075	0.756309	1.54819e-22	0.0106432	0.00409854	0.00160461	0.733459
LRRC56	0	0	0	0	0.483787	0.0505185	0.751522	1.57013e-22	0.0106971	-0.000725932	0.000284403	0.733459
DQX1	0	0	0	0	0.479208	0.053041	0.758244	1.87477e-22	0.0107314	0.00117537	0.000460684	0.733459
SUSD6	0	0	0	0	0.481076	0.05395	0.748117	9.6804e-23	0.0107353	0.00147113	0.000576634	0.733459
TJP2	0	0	0	0	0.471131	0.053207	0.756153	1.54683e-22	0.0108236	0.000990818	0.000388803	0.733459
NCF2	0	0	0	0	0.476322	0.0526587	0.752853	2.25666e-22	0.0108491	-0.00070614	0.000277183	0.733459
UPK3B	0	0	0	0	0.482323	0.052906	0.759892	1.44686e-22	0.0108722	-0.00131577	0.000516632	0.733459
CDC37L1	0	0	0	0	0.484996	0.052662	0.756391	1.47895e-22	0.0110035	-0.00288738	0.00113559	0.733459
ELMO3	0	0	0	0	0.479674	0.0526639	0.754436	1.25961e-22	0.0110656	-0.000525807	0.000206957	0.733459
DTL	0	0	0	0	0.479862	0.0525796	0.75545	1.58511e-22	0.0110686	0.00241512	0.000950623	0.733459
ACHE	0	0	0	0	0.485631	0.0536576	0.754665	1.31052e-22	0.0111046	-0.00186218	0.000733306	0.733459
LARP4B	0	0	0	0	0.487253	0.0546096	0.755029	1.4144e-22	0.0111764	-0.00147608	0.000581782	0.733459
HIPK3	0	0	0	0	0.476693	0.0535169	0.753805	2.25113e-22	0.0111794	0.00123233	0.000485729	0.733459
VPS4B	0	0	0	0	0.481122	0.0526326	0.760085	2.45915e-22	0.0112801	-0.00104323	0.000411703	0.733459
RPP30	0	0	0	0	0.489157	0.0533693	0.753569	1.63928e-22	0.0113441	-0.00254933	0.00100686	0.733459
EGFL8	0	0	0	0	0.476811	0.0530437	0.758363	1.41885e-22	0.011351	-0.000600212	0.000237075	0.733459
MCM3	0	0	0	0	0.477445	0.0530233	0.760994	1.8198e-22	0.0113591	0.000888869	0.000351125	0.733459
UCMA	0	0	0	0	0.482964	0.0513465	0.761514	1.51626e-22	0.0113831	0.00183072	0.000723393	0.733459
POU6F1	0	0	0	0	0.479684	0.0530495	0.749188	1.58792e-22	0.0114046	-0.00349769	0.00138244	0.733459
ZNF208	0	0	0	0	0.479554	0.0522777	0.75586	1.2675e-22	0.0114296	0.00123295	0.000487465	0.733459
MLH1	0	0	0	0	0.474496	0.0510452	0.750235	1.46906e-22	0.0114486	0.000531702	0.000210264	0.733459
PRRT2	0	0	0	0	0.475057	0.0523031	0.753404	1.78414e-22	0.011506	0.00263475	0.00104265	0.733459
SNAPC1	0	0	0	0	0.477291	0.0534895	0.760762	1.94458e-22	0.0115362	0.00128825	0.000509983	0.733459
COMMD5	0	0	0	0	0.479533	0.0527869	0.753971	1.50432e-22	0.0115525	-0.00241118	0.000954708	0.733459
KY	0	0	0	0	0.479266	0.0541123	0.766497	1.59121e-22	0.0116426	0.00147662	0.000585302	0.733459
KCND1	0	0	0	0	0.472186	0.0512286	0.755914	1.34463e-22	0.0116583	0.002362	0.000936428	0.733459
CHST3	0	0	0	0	0.47954	0.0529824	0.761183	1.46641e-22	0.0117105	-0.00219091	0.000869139	0.733459
MMGT1	0	0	0	0	0.475718	0.0528792	0.763351	1.88208e-22	0.0118117	0.00981698	0.0038991	0.733459
DYNLL1	0	0	0	0	0.477829	0.0519855	0.742413	1.4712e-22	0.0118152	0.0122325	0.0048587	0.733459
BUB3	0	0	0	0	0.474256	0.05284	0.751957	1.49899e-22	0.0118515	-0.00448648	0.00178278	0.733459
ZNF735	0	0	0	0	0.487229	0.0538093	0.760717	1.63823e-22	0.0118605	0.0115166	0.0045768	0.733459
CBFA2T3	0	0	0	0	0.473431	0.0544522	0.768713	2.05602e-22	0.0118976	0.000830782	0.000330304	0.733459
RGMB	0	0	0	0	0.488487	0.0522537	0.757706	1.59714e-22	0.0119105	-0.00169944	0.00067577	0.733459
CEP120	0	0	0	0	0.473346	0.0541263	0.761359	1.87252e-22	0.0119456	0.00110915	0.000441226	0.733459
SETX	0	0	0	0	0.479195	0.0527112	0.756419	1.61743e-22	0.0119564	-0.000744618	0.000296252	0.733459
TFG	0	0	0	0	0.476238	0.0536111	0.763355	1.35088e-22	0.0119569	0.00263671	0.00104904	0.733459
SYT9	0	0	0	0	0.483196	0.0535542	0.752957	1.71971e-22	0.0119981	-0.000849403	0.000338107	0.733459
TEX45	0	0	0	0	0.468732	0.0531649	0.760995	1.5455e-22	0.0120358	0.00227939	0.000907718	0.733459
RFC2	0	0	0	0	0.476372	0.0538478	0.765594	1.53837e-22	0.0120592	-0.00211357	0.000841913	0.733459
CIB3	0	0	0	0	0.479029	0.05358	0.750019	1.27439e-22	0.0120773	-0.00204444	0.000814547	0.733459
GRM7	0	0	0	0	0.479206	0.0528579	0.755807	1.70035e-22	0.0121379	-0.0015748	0.000627873	0.733459
ENOSF1	0	0	0	0	0.481917	0.0538226	0.754244	1.7102e-22	0.0121482	0.00112404	0.00044821	0.733459
UNC93B1	0	0	0	0	0.474623	0.0527732	0.756734	1.44147e-22	0.0121681	0.000575661	0.000229597	0.733459
CHRNB3	0	0	0	0	0.484812	0.0551461	0.748988	1.09349e-22	0.0121828	0.00131025	0.000522672	0.733459
ABCC2	0	0	0	0	0.477133	0.0538323	0.752028	1.70994e-22	0.012205	0.000585783	0.000233734	0.733459
IRX3	0	0	0	0	0.480147	0.0514687	0.763429	1.70379e-22	0.0122427	-0.00207231	0.000827236	0.733459
CNST	0	0	0	0	0.481345	0.0537242	0.754951	1.68766e-22	0.0122663	-0.00130723	0.00052197	0.733459
STX10	0	0	0	0	0.480301	0.0519545	0.758193	1.38543e-22	0.0123319	-0.00215456	0.00086095	0.733459
OTULIN	0	0	0	0	0.477737	0.0533833	0.753506	1.27077e-22	0.0123324	-0.0025325	0.00101198	0.733459
SMIM18	0	0	0	0	0.472567	0.0531212	0.753323	1.53062e-22	0.0125589	-0.00649847	0.00260348	0.739258
TRAPPC6A	0	0	0	0	0.460597	0.0535038	0.758142	1.28004e-22	0.0125652	0.00157194	0.00062981	0.739258
PNCK	0	0	0	0	0.478968	0.0521282	0.759083	1.63403e-22	0.012631	0.00154243	0.000618446	0.739258
PEX5L	0	0	0	0	0.49299	0.0521112	0.747064	1.30981e-22	0.0126869	-0.00176919	0.000709812	0.739258
ZNF282	0	0	0	0	0.475288	0.0532334	0.747069	1.61616e-22	0.012707	0.00145053	0.000582098	0.739258
MAOA	0	0	0	0	0.471051	0.0527099	0.755807	1.6209e-22	0.0127117	0.00552678	0.002218	0.739258
RSRC1	0	0	0	0	0.475928	0.053308	0.757246	1.32649e-22	0.0127344	0.00129931	0.000521572	0.739258
CDH24	0	0	0	0	0.479211	0.0539083	0.756027	1.49729e-22	0.0128302	0.000767587	0.000308456	0.739258
HNRNPUL1	0	0	0	0	0.472969	0.0537752	0.755718	1.15917e-22	0.0128391	-0.00183692	0.000738244	0.739258
FCHSD2	0	0	0	0	0.483677	0.0530448	0.757229	1.37888e-22	0.0128702	0.00174733	0.000702478	0.739258
ACACA	0	0	0	0	0.479057	0.052864	0.756575	1.35216e-22	0.012881	0.00133442	0.000536543	0.739258
SCTR	0	0	0	0	0.4805	0.0533974	0.756554	1.06402e-22	0.0129079	-0.000767292	0.000308604	0.739258
ZC3H4	0	0	0	0	0.47671	0.0537031	0.756206	1.65021e-22	0.012976	-0.00138677	0.000558179	0.740868
NOL10	0	0	0	0	0.482879	0.0523136	0.750217	1.48948e-22	0.0131128	-0.00132702	0.000534933	0.741339
DDIT4	0	0	0	0	0.474638	0.0531081	0.757806	1.46971e-22	0.0131149	0.00359222	0.00144808	0.741339
CASP9	0	0	0	0	0.476188	0.053038	0.746402	1.3886e-22	0.0131223	-0.00132773	0.000535275	0.741339
PHYHIPL	0	0	0	0	0.474373	0.0538664	0.765287	1.46663e-22	0.013144	-0.00433276	0.00174717	0.741339
ZNF331	0	0	0	0	0.484246	0.0515613	0.761159	1.45236e-22	0.0131937	-0.00319847	0.00129047	0.741615
ZNF419	0	0	0	0	0.478566	0.0529545	0.751782	1.43054e-22	0.0132288	-0.00102692	0.000414486	0.741615
SLC2A10	0	0	0	0	0.476624	0.0534929	0.764862	1.55254e-22	0.0133566	0.00189278	0.000765022	0.746523
SPRED1	0	0	0	0	0.482027	0.0538831	0.756625	1.32056e-22	0.0135611	-0.00277712	0.00112492	0.755672
GCC1	0	0	0	0	0.483034	0.0524338	0.758413	1.78354e-22	0.0136054	0.00141575	0.000573746	0.755873
ACTR2	0	0	0	0	0.474681	0.0527602	0.749283	1.49079e-22	0.0136642	-0.00454386	0.0018426	0.756875
C12orf10	0	0	0	0	0.481907	0.0525115	0.7614	1.5273e-22	0.0137318	0.000839824	0.000340805	0.757156
ERI1	0	0	0	0	0.481347	0.0523723	0.758746	1.50581e-22	0.0137916	-0.00178242	0.000723771	0.757156
ZSCAN29	0	0	0	0	0.477153	0.0506777	0.751684	1.44097e-22	0.0138544	-0.0010058	0.000408688	0.757156
CCBE1	0	0	0	0	0.483928	0.0527073	0.74887	1.42586e-22	0.0138705	-0.000907611	0.000368853	0.757156
CAPN2	0	0	0	0	0.469953	0.0534679	0.756554	1.42231e-22	0.0139127	0.00071412	0.000290347	0.757156
NSG1	0	0	0	0	0.477936	0.0512471	0.753832	2.10306e-22	0.0139141	0.0012514	0.000508802	0.757156
ALKBH5	0	0	0	0	0.487035	0.0532442	0.757479	1.7771e-22	0.0139747	-0.00292709	0.00119087	0.758228
ABHD5	0	0	0	0	0.477944	0.0528222	0.755392	1.63417e-22	0.0141192	-0.0035153	0.00143233	0.762815
MYMK	0	0	0	0	0.480117	0.0541542	0.755964	1.53596e-22	0.0141414	0.00212463	0.000865892	0.762815
C17orf50	0	0	0	0	0.477445	0.0526475	0.760745	9.82946e-23	0.0142678	-0.00127654	0.000520936	0.764697
POMZP3	0	0	0	0	0.481108	0.0527315	0.758038	1.7064e-22	0.0142862	-0.00573063	0.00233902	0.764697
NIFK	0	0	0	0	0.476607	0.0520323	0.751053	1.52619e-22	0.0143084	0.00250734	0.00102363	0.764697
FER1L6	0	0	0	0	0.46924	0.0550042	0.751637	1.49144e-22	0.0143412	0.000431079	0.000176049	0.764697
S1PR2	0	0	0	0	0.480117	0.054411	0.758536	1.62395e-22	0.0144556	0.00103024	0.000421234	0.768588
FYN	0	0	0	0	0.483969	0.0513973	0.752849	1.54254e-22	0.0145874	-0.00287896	0.0011787	0.769522
CARHSP1	0	0	0	0	0.484211	0.0527223	0.760442	1.31437e-22	0.0146278	-0.00156344	0.000640361	0.769522
FSTL1	0	0	0	0	0.474738	0.0536174	0.760544	1.41944e-22	0.0147109	0.00221493	0.000907964	0.769522
LYVE1	0	0	0	0	0.47787	0.0538508	0.75607	1.53143e-22	0.0147257	-0.00145628	0.000597059	0.769522
TLNRD1	0	0	0	0	0.478887	0.0525995	0.760327	1.45813e-22	0.0147387	-0.00274824	0.0011269	0.769522
BHLHE23	0	0	0	0	0.478321	0.0516569	0.754397	1.43996e-22	0.0147461	0.00215684	0.000884461	0.769522
HLTF	0	0	0	0	0.463753	0.0522254	0.759936	1.85085e-22	0.01483	0.000929931	0.000381661	0.769522
SLC12A4	0	0	0	0	0.474465	0.0526714	0.748326	1.9358e-22	0.0148731	-0.000699148	0.000287067	0.769522
CCM2	0	0	0	0	0.476919	0.0527832	0.762398	1.54125e-22	0.0150274	-0.00166169	0.000683329	0.769522
PKD1L3	0	0	0	0	0.480791	0.0509647	0.761178	1.68704e-22	0.0150985	-0.00201365	0.000828649	0.769522
FAM57A	0	0	0	0	0.478354	0.0516934	0.756913	1.54547e-22	0.0151076	-0.00206869	0.000851373	0.769522
CETN1	0	0	0	0	0.47545	0.0523524	0.754236	1.1392e-22	0.0151776	0.0023842	0.000981902	0.769522
MVP	0	0	0	0	0.482135	0.0531055	0.758196	1.62415e-22	0.0151916	-0.000845373	0.000348204	0.769522
ABTB1	0	0	0	0	0.472841	0.0521556	0.757383	1.28653e-22	0.0152664	-0.000538269	0.000221872	0.769522
IL37	0	0	0	0	0.483841	0.0525986	0.755181	1.49994e-22	0.0152805	-0.00587077	0.00242024	0.769522
TNNI3K	0	0	0	0	0.486558	0.0528944	0.768642	1.63943e-22	0.015324	-0.0260308	0.0107358	0.769522
RPP25L	0	0	0	0	0.478496	0.0527674	0.756437	1.42263e-22	0.0153318	0.00306217	0.00126302	0.769522
TMTC1	0	0	0	0	0.477349	0.0532084	0.758798	1.80723e-22	0.0153433	0.000993956	0.000410013	0.769522
ADNP2	0	0	0	0	0.478861	0.052213	0.751217	1.86425e-22	0.0154201	0.00182501	0.000753391	0.769522
METTL25	0	0	0	0	0.481631	0.0528595	0.759864	1.6538e-22	0.015455	0.00147172	0.000607757	0.769522
KCNK3	0	0	0	0	0.474082	0.0513335	0.747983	1.43955e-22	0.0154893	0.00328745	0.00135802	0.769522
EXOSC5	0	0	0	0	0.476376	0.0516854	0.756753	1.44973e-22	0.0155314	0.00185356	0.000766004	0.769522
MAGEB4	0	0	0	0	0.476286	0.0528918	0.754625	1.6453e-22	0.0155361	0.0113057	0.00467244	0.769522
GRM6	0	0	0	0	0.477113	0.0527318	0.74722	2.02512e-22	0.015551	0.00067995	0.00028105	0.769522
OSBPL11	0	0	0	0	0.472239	0.0542622	0.763305	1.41336e-22	0.0155883	0.0017607	0.000728031	0.769522
NDST2	0	0	0	0	0.478848	0.0531138	0.76353	1.76586e-22	0.0155889	0.000991731	0.000410072	0.769522
PSMC1	0	0	0	0	0.481385	0.0525789	0.761384	1.49137e-22	0.0156398	-0.00443171	0.00183337	0.769522
ZNF493	0	0	0	0	0.481321	0.0522535	0.763984	2.02483e-22	0.0156473	-0.00134048	0.000554589	0.769522
MED31	0	0	0	0	0.481956	0.0536859	0.763221	1.75579e-22	0.0156788	-0.00344392	0.00142526	0.769522
LOXL1	0	0	0	0	0.483187	0.052003	0.753561	2.34932e-22	0.0157446	-0.00113347	0.000469381	0.769522
TRIM9	0	0	0	0	0.481332	0.0540077	0.761304	1.39111e-22	0.0157871	-0.00263132	0.0010901	0.769522
CALCOCO1	0	0	0	0	0.495519	0.0542002	0.758484	1.6559e-22	0.0158166	-0.00121003	0.00050143	0.769522
TMEM35A	0	0	0	0	0.46738	0.0522893	0.75789	1.36662e-22	0.0158556	0.0107856	0.00447115	0.769522
GLOD4	0	0	0	0	0.475713	0.0525055	0.755826	1.43312e-22	0.0158831	-0.00144632	0.000599728	0.769522
LONRF1	0	0	0	0	0.478827	0.0521927	0.754283	1.32151e-22	0.0159574	-0.00168676	0.000699923	0.769839
C8B	0	0	0	0	0.471543	0.0518063	0.747675	1.22129e-22	0.0159726	0.00064041	0.000265777	0.769839
ZSWIM7	0	0	0	0	0.472995	0.0512846	0.754212	1.54337e-22	0.0160251	-0.00443009	0.00183945	0.770366
SLC22A7	0	0	0	0	0.483671	0.0520511	0.754078	1.4141e-22	0.0160773	0.00125748	0.000522387	0.770878
SNX16	0	0	0	0	0.472996	0.0525841	0.759614	2.00595e-22	0.0162197	0.00114242	0.000475224	0.774362
HOXA9	0	0	0	0	0.482838	0.0524	0.755457	1.41028e-22	0.0163374	-0.00128651	0.000535752	0.774362
COPS4	0	0	0	0	0.489466	0.0538005	0.761177	1.64158e-22	0.0163429	-0.00503473	0.00209676	0.774362
SMIM9	0	0	0	0	0.476803	0.0536137	0.752033	1.46102e-22	0.0163635	-0.0143732	0.005987	0.774362
ZNF169	0	0	0	0	0.472628	0.0537511	0.762652	1.44293e-22	0.0163792	0.0018302	0.000762462	0.774362
MAGEC1	0	0	0	0	0.47324	0.0524389	0.752432	1.38009e-22	0.0164108	0.00184692	0.000769654	0.774362
ADCY6	0	0	0	0	0.477236	0.0513955	0.757729	2.43928e-22	0.0164421	-0.000668048	0.000278471	0.774362
CX3CL1	0	0	0	0	0.482668	0.0544182	0.75766	1.37916e-22	0.0165821	-0.00146051	0.000609595	0.775512
TAS2R1	0	0	0	0	0.479852	0.0531558	0.745658	1.31092e-22	0.0165899	0.00471126	0.00196655	0.775512
DHX58	0	0	0	0	0.471645	0.0527911	0.76393	1.19232e-22	0.0165918	-0.00104267	0.000435235	0.775512
VEGFA	0	0	0	0	0.479318	0.0532547	0.757176	1.31392e-22	0.0166514	-0.00167116	0.000697961	0.776338
NKD2	0	0	0	0	0.482964	0.0527503	0.754415	1.45924e-22	0.0167235	-0.00168313	0.000703425	0.777749
CTCF	0	0	0	0	0.479853	0.0523867	0.757918	1.92053e-22	0.0167985	-0.000937331	0.000392005	0.778461
ZNF155	0	0	0	0	0.481139	0.0527714	0.750974	1.30981e-22	0.0168671	-0.0020634	0.000863484	0.778461
RIN2	0	0	0	0	0.480386	0.0514732	0.768338	1.53184e-22	0.016944	0.000664995	0.00027848	0.778461
SFXN1	0	0	0	0	0.472682	0.052081	0.756515	1.61228e-22	0.0169837	0.000935995	0.000392107	0.778461
SLC47A2	0	0	0	0	0.487362	0.0523016	0.749317	1.18893e-22	0.0171226	-0.00100698	0.000422373	0.778461
PCMTD1	0	0	0	0	0.479588	0.0523517	0.756988	1.59987e-22	0.0171391	-0.00561254	0.00235451	0.778461
ZNF565	0	0	0	0	0.480242	0.0535202	0.757081	1.42525e-22	0.0171825	0.00280422	0.00117685	0.778461
OPRK1	0	0	0	0	0.475644	0.0525131	0.765731	1.7447e-22	0.0171993	0.00142118	0.000596518	0.778461
CCNA2	0	0	0	0	0.477425	0.0511861	0.756804	1.61897e-22	0.0172006	0.00305622	0.00128282	0.778461
WDR62	0	0	0	0	0.475356	0.0535925	0.750222	1.1494e-22	0.0172632	-0.00076817	0.000322614	0.778461
EPRS	0	0	0	0	0.483335	0.0529729	0.750537	1.66123e-22	0.0172899	0.00120385	0.000505711	0.778461
AXIN1	0	0	0	0	0.476789	0.0535252	0.758224	1.35514e-22	0.0173869	0.000921549	0.000387458	0.778461
HHLA3	0	0	0	0	0.476055	0.0521891	0.753045	1.28954e-22	0.0174393	0.0112707	0.00474089	0.778461
IP6K3	0	0	0	0	0.477389	0.0522394	0.751333	1.38958e-22	0.0175143	0.00121948	0.0005133	0.778461
BZW2	0	0	0	0	0.482359	0.0534613	0.762045	1.47953e-22	0.0175928	-0.00308889	0.00130107	0.778461
NR2F6	0	0	0	0	0.478236	0.0545109	0.754476	1.48209e-22	0.0175936	-0.00224777	0.00094679	0.778461
PSMD4	0	0	0	0	0.474323	0.0518811	0.756182	1.44393e-22	0.0176043	-0.00383133	0.00161396	0.778461
GZF1	0	0	0	0	0.482141	0.0526035	0.753195	1.36409e-22	0.0176279	0.00174329	0.000734521	0.778461
MXRA7	0	0	0	0	0.480635	0.0528049	0.756895	1.55296e-22	0.0176314	0.00148557	0.00062595	0.778461
CCDC184	0	0	0	0	0.479221	0.0532973	0.766647	1.44331e-22	0.0176457	-0.00315168	0.00132814	0.778461
COX7A2	0	0	0	0	0.476751	0.0540485	0.754702	1.35286e-22	0.0176536	0.00391279	0.00164899	0.778461
IRF5	0	0	0	0	0.479923	0.0533244	0.763843	1.41881e-22	0.0176618	-0.00248262	0.00104634	0.778461
TJP1	0	0	0	0	0.474255	0.0523848	0.758356	1.84431e-22	0.0178215	0.000771264	0.000325519	0.779879
HOXD8	0	0	0	0	0.4776	0.0523146	0.754774	1.58842e-22	0.0178241	-0.00137071	0.000578532	0.779879
SSU72	0	0	0	0	0.474895	0.0533575	0.757663	1.34796e-22	0.0178824	-0.00638794	0.00269752	0.779879
MTX3	0	0	0	0	0.482678	0.0523886	0.748594	1.50555e-22	0.0179399	-0.00233493	0.000986498	0.779879
KRTAP12-1	0	0	0	0	0.479211	0.0520205	0.752954	1.26074e-22	0.0179776	0.00412467	0.00174323	0.779879
CASQ2	0	0	0	0	0.480291	0.0516761	0.757201	1.55812e-22	0.0180807	0.00148978	0.000630197	0.779879
ZC3H11A	0	0	0	0	0.486461	0.0515431	0.757026	1.72146e-22	0.0181104	-0.00160994	0.0006812	0.779879
NR4A3	0	0	0	0	0.47856	0.0540461	0.755988	1.71248e-22	0.0181363	0.00208012	0.000880345	0.779879
SFTPA2	0	0	0	0	0.479753	0.053369	0.755626	1.3843e-22	0.0181558	0.00258917	0.00109597	0.779879
VAX1	0	0	0	0	0.480196	0.0543616	0.764853	1.46354e-22	0.0182164	-0.00294365	0.00124667	0.779879
CXCR1	0	0	0	0	0.474378	0.053836	0.756028	1.18672e-22	0.0182422	-0.00128576	0.000544655	0.779879
FAM83G	0	0	0	0	0.479784	0.0519867	0.764929	1.49943e-22	0.0182782	-0.000800722	0.000339294	0.779879
ZNF606	0	0	0	0	0.483119	0.0530524	0.759543	1.46197e-22	0.0182903	0.00183646	0.000778257	0.779879
CHRNG	0	0	0	0	0.471775	0.0531503	0.755775	1.42784e-22	0.0183788	0.00079809	0.000338471	0.779879
LSM6	0	0	0	0	0.482847	0.0529237	0.758183	1.52392e-22	0.0184575	0.0096175	0.00408154	0.779879
GOLT1B	0	0	0	0	0.480056	0.0540648	0.75005	1.17e-22	0.0184694	-0.00529758	0.00224845	0.779879
SEC11C	0	0	0	0	0.478232	0.0533617	0.750414	1.49361e-22	0.018491	-0.004499	0.00190986	0.779879
C1orf68	0	0	0	0	0.472921	0.0530443	0.763689	1.3949e-22	0.0185023	0.00297101	0.00126134	0.779879
EIPR1	0	0	0	0	0.477905	0.0532202	0.76234	1.41964e-22	0.018527	-0.00180563	0.000766741	0.779879
ABI2	0	0	0	0	0.473612	0.0529233	0.75874	1.53694e-22	0.0185659	-0.00239552	0.00101757	0.779879
COL5A2	0	0	0	0	0.475079	0.0524472	0.761117	1.33216e-22	0.0185766	-0.000876569	0.000372382	0.779879
HMGCR	0	0	0	0	0.471902	0.0520629	0.760857	1.6336e-22	0.0187769	0.00184221	0.000783931	0.782031
YOD1	0	0	0	0	0.481954	0.0520902	0.755413	1.50715e-22	0.0188133	-0.00283169	0.00120537	0.782031
HHIP	0	0	0	0	0.476329	0.0527055	0.762994	1.44195e-22	0.0188611	0.00178215	0.000758915	0.782031
CASC10	0	0	0	0	0.475939	0.0527923	0.749412	1.36544e-22	0.0188933	-0.00380402	0.00162035	0.782031
CCNB1	0	0	0	0	0.482168	0.0543283	0.756457	1.5976e-22	0.0189249	0.00250891	0.00106897	0.782031
ZNF763	0	0	0	0	0.477672	0.0519661	0.751356	1.31393e-22	0.0189299	-0.00172328	0.000734267	0.782031
PGM3	0	0	0	0	0.478525	0.05265	0.759616	1.51563e-22	0.0189607	0.00214726	0.000915154	0.782031
PPIH	0	0	0	0	0.475473	0.0534241	0.761723	1.53136e-22	0.018965	-0.00239639	0.00102137	0.782031
ZNF708	0	0	0	0	0.476174	0.0524251	0.760509	1.3287e-22	0.0190281	0.00138311	0.000589809	0.782516
GGA1	0	0	0	0	0.478415	0.0524047	0.753022	1.76501e-22	0.019081	-0.00148791	0.000634782	0.782516
PMP22	0	0	0	0	0.483381	0.0553689	0.754632	1.85934e-22	0.0191057	0.00105043	0.000448234	0.782516
SRRT	0	0	0	0	0.474352	0.0535982	0.759704	1.44264e-22	0.0192252	-0.00165643	0.000707523	0.782516
PAPD5	0	0	0	0	0.482433	0.053919	0.74644	1.17444e-22	0.0192506	-0.00249527	0.00106605	0.782516
DIS3L2	0	0	0	0	0.484145	0.0523464	0.751578	1.85637e-22	0.0193107	-0.000877565	0.000375107	0.782516
OR4B1	0	0	0	0	0.471294	0.0530995	0.762027	1.47948e-22	0.0193328	-0.00218788	0.00093536	0.782516
ARHGAP21	0	0	0	0	0.479008	0.05252	0.757405	1.58868e-22	0.01934	0.00064705	0.000276642	0.782516
HCN3	0	0	0	0	0.478927	0.0536674	0.764624	1.42162e-22	0.0194199	-0.000818018	0.000349969	0.782516
SPAG16	0	0	0	0	0.475288	0.052508	0.764791	1.64796e-22	0.0195372	-0.00160433	0.000687037	0.782516
FAM186B	0	0	0	0	0.475624	0.0533643	0.74945	1.32361e-22	0.0195953	-0.000750748	0.000321652	0.782516
TACC3	0	0	0	0	0.477252	0.0523146	0.759511	1.69303e-22	0.0196166	0.00171499	0.000734902	0.782516
PCSK2	0	0	0	0	0.479888	0.0532707	0.754194	1.41291e-22	0.019624	0.00263069	0.00112736	0.782516
GLYCTK	0	0	0	0	0.476334	0.0516881	0.762137	1.47067e-22	0.019659	-0.00165571	0.000709745	0.782516
FBXO47	0	0	0	0	0.483643	0.0530874	0.758171	1.18206e-22	0.0196742	0.00131019	0.000561703	0.782516
ADA2	0	0	0	0	0.477674	0.0539451	0.754608	1.63645e-22	0.0197012	0.00201748	0.000865122	0.782516
AANAT	0	0	0	0	0.481757	0.0537514	0.751205	1.60865e-22	0.0197138	-0.00216038	0.000926496	0.782516
ABCA8	0	0	0	0	0.482504	0.0528209	0.759029	1.96174e-22	0.0197358	0.000625624	0.000268352	0.782516
TYW1	0	0	0	0	0.472342	0.0539164	0.756828	1.29462e-22	0.0199066	-0.00126661	0.000544046	0.785791
DIP2B	0	0	0	0	0.479378	0.0522514	0.756778	1.47654e-22	0.0199414	-0.00105806	0.000454593	0.785791
CYP11A1	0	0	0	0	0.488989	0.0522763	0.751576	2.13661e-22	0.0199674	0.001341	0.000576282	0.785791
SUGT1	0	0	0	0	0.480305	0.0526279	0.763922	1.22258e-22	0.0199878	0.00231725	0.00099598	0.785791
CFAP157	0	0	0	0	0.48439	0.0532683	0.760865	1.54603e-22	0.0200895	0.00150832	0.000648823	0.788122
HIST1H2BC	0	0	0	0	0.477449	0.0522108	0.756628	1.31416e-22	0.0201499	-0.00390051	0.00167867	0.788822
INCA1	0	0	0	0	0.485597	0.0524049	0.759356	1.50766e-22	0.0202094	-0.00228566	0.00098415	0.789038
HCRTR2	0	0	0	0	0.469672	0.0525352	0.75247	1.4439e-22	0.0202405	0.00141026	0.000607378	0.789038
TBC1D13	0	0	0	0	0.482152	0.054317	0.758641	1.71014e-22	0.0203174	0.00202078	0.000870854	0.790134
WNT7B	0	0	0	0	0.486522	0.0527936	0.752415	1.39829e-22	0.0203537	0.0025063	0.0010804	0.790134
CSNK1G2	0	0	0	0	0.481622	0.0545591	0.74882	1.31226e-22	0.0204092	-0.00173082	0.00074644	0.790632
ABL2	0	0	0	0	0.476585	0.0535382	0.75933	1.36409e-22	0.0205779	0.00121233	0.000523532	0.792342
CCDC125	0	0	0	0	0.487371	0.0521	0.754374	1.26301e-22	0.0206208	-0.00107521	0.000464476	0.792342
HAS3	0	0	0	0	0.475971	0.0533559	0.765067	1.71167e-22	0.0206606	-0.00160057	0.000691641	0.792342
MLXIP	0	0	0	0	0.486514	0.0530152	0.756778	1.81594e-22	0.0206988	0.00142267	0.000614955	0.792342
HSPB11	0	0	0	0	0.475568	0.0537173	0.753629	1.39473e-22	0.020699	0.00276323	0.00119442	0.792342
LY75	0	0	0	0	0.480301	0.0540399	0.759522	1.7237e-22	0.0208837	0.0106318	0.00460228	0.792342
PSD2	0	0	0	0	0.477714	0.0530135	0.761885	1.4608e-22	0.0209225	-0.000842452	0.000364791	0.792342
LIPK	0	0	0	0	0.474154	0.0540437	0.753592	1.42383e-22	0.0210193	-0.000903415	0.000391484	0.792342
SUV39H2	0	0	0	0	0.481042	0.0551861	0.754482	1.43095e-22	0.0210221	-0.00739301	0.00320375	0.792342
CEP70	0	0	0	0	0.487066	0.0535018	0.757817	1.53372e-22	0.0210916	-0.0011665	0.000505772	0.792342
MITD1	0	0	0	0	0.480187	0.0533231	0.757087	1.42096e-22	0.0211038	-0.00342496	0.00148514	0.792342
CKM	0	0	0	0	0.480574	0.0516889	0.752413	1.28991e-22	0.0211041	-0.00123292	0.000534623	0.792342
CEACAM7	0	0	0	0	0.478414	0.0523287	0.746157	1.62897e-22	0.0211804	0.00460133	0.00199643	0.792342
CDC6	0	0	0	0	0.479038	0.0515261	0.759426	1.83316e-22	0.02123	0.00160095	0.000694886	0.792342
TLN1	0	0	0	0	0.478555	0.0530637	0.759289	1.6845e-22	0.0212355	-0.000806127	0.000349912	0.792342
RSAD1	0	0	0	0	0.485993	0.0540151	0.761098	1.29301e-22	0.0212398	-0.00120939	0.000524973	0.792342
ROBO4	0	0	0	0	0.478013	0.0531528	0.755401	1.40986e-22	0.0212552	0.000743389	0.000322729	0.792342
ZNF853	0	0	0	0	0.477399	0.0535113	0.767956	1.84019e-22	0.0212659	-0.00146823	0.00063746	0.792342
JPT1	0	0	0	0	0.479772	0.0533566	0.758974	1.61846e-22	0.0213185	0.00107944	0.00046885	0.792342
ACBD5	0	0	0	0	0.47749	0.0530652	0.758032	1.21743e-22	0.0213267	-0.00139682	0.000606739	0.792342
EBP	0	0	0	0	0.474634	0.0525569	0.757658	1.5794e-22	0.02135	0.00274314	0.00119175	0.792342
ZNF273	0	0	0	0	0.482582	0.053751	0.753927	1.44893e-22	0.0214278	0.00260969	0.00113446	0.793643
FOXI3	0	0	0	0	0.483291	0.0514692	0.755541	1.49609e-22	0.0215389	0.00657299	0.00285977	0.794531
LSM14A	0	0	0	0	0.476882	0.0523115	0.756628	1.75914e-22	0.0215628	-0.0013845	0.000602477	0.794531
RPL17-C18orf32	0	0	0	0	0.480484	0.0539431	0.756494	1.43575e-22	0.0215954	-0.043965	0.0191366	0.794531
TRAPPC10	0	0	0	0	0.482382	0.0537522	0.749572	1.31964e-22	0.0216231	-0.00097763	0.000425621	0.794531
CEP57	0	0	0	0	0.486496	0.0525467	0.756804	1.46687e-22	0.0216898	-0.00104105	0.000453462	0.795406
P2RX3	0	0	0	0	0.485919	0.0523756	0.758869	1.5581e-22	0.0218957	-0.00171321	0.00074741	0.796653
MDN1	0	0	0	0	0.476855	0.0535426	0.756105	1.22214e-22	0.0219212	-0.000458867	0.000200225	0.796653
C20orf85	0	0	0	0	0.479606	0.0529738	0.766666	1.6748e-22	0.0219619	-0.00173621	0.000757824	0.796653
GPR55	0	0	0	0	0.482767	0.0515242	0.755906	1.7169e-22	0.0219623	-0.00278613	0.00121609	0.796653
ZNF506	0	0	0	0	0.478724	0.0523268	0.758171	1.71584e-22	0.0219757	0.00303257	0.00132379	0.796653
SNRPB2	0	0	0	0	0.478899	0.0530348	0.759182	1.5476e-22	0.0220443	-0.00366936	0.0016026	0.796653
LMLN	0	0	0	0	0.479102	0.0532321	0.761161	1.66658e-22	0.0220553	-0.00159835	0.000698138	0.796653
RPH3AL	0	0	0	0	0.484949	0.0528023	0.762886	1.48459e-22	0.0220775	0.000956339	0.000417787	0.796653
KRT28	0	0	0	0	0.476532	0.0533399	0.760168	1.40023e-22	0.0221102	0.000992144	0.000433535	0.796653
CMTM5	0	0	0	0	0.47218	0.0525318	0.77141	1.44881e-22	0.0222306	-0.0013533	0.000591881	0.799439
FOXRED2	0	0	0	0	0.476864	0.0530575	0.760586	1.59782e-22	0.0224327	0.00104619	0.000458253	0.800493
TNFRSF10A	0	0	0	0	0.468854	0.0525866	0.758989	1.57947e-22	0.0224968	-0.0026379	0.00115601	0.800493
PLXND1	0	0	0	0	0.486245	0.0535412	0.757771	1.61858e-22	0.0225245	0.000872181	0.000382295	0.800493
FRAS1	0	0	0	0	0.473734	0.0517198	0.759165	1.79127e-22	0.022527	0.000366897	0.000160822	0.800493
CENPE	0	0	0	0	0.477866	0.0525604	0.759351	1.24911e-22	0.0225384	-0.00102465	0.000449172	0.800493
ASGR1	0	0	0	0	0.482506	0.052556	0.760492	1.41088e-22	0.0226708	-0.00191106	0.000838565	0.800493
ACADS	0	0	0	0	0.478652	0.0517489	0.753731	1.5817e-22	0.0226714	0.00113747	0.00049912	0.800493
KIR2DL4	0	0	0	0	0.480978	0.0530386	0.761154	1.59188e-22	0.0227964	-0.00316165	0.0013886	0.800493
SH3GL1	0	0	0	0	0.475092	0.0533152	0.755969	1.59348e-22	0.0228192	0.00182955	0.000803675	0.800493
CP	0	0	0	0	0.479392	0.0518356	0.760735	1.84949e-22	0.0228421	0.000750368	0.000329674	0.800493
BANF1	0	0	0	0	0.481265	0.0528462	0.755736	1.66152e-22	0.0230869	-0.0139565	0.00614276	0.800493
IDUA	0	0	0	0	0.480813	0.0514426	0.758681	2.04176e-22	0.0230964	-0.000730206	0.000321413	0.800493
LRRN1	0	0	0	0	0.47277	0.0544815	0.753735	1.7271e-22	0.0231064	0.00110002	0.00048423	0.800493
RHOU	0	0	0	0	0.480101	0.0517382	0.751427	1.50442e-22	0.0231547	0.0020075	0.000884012	0.800493
ATP9A	0	0	0	0	0.478555	0.0534332	0.757649	1.27072e-22	0.0232715	-0.00123199	0.000542973	0.800493
ZNF8	0	0	0	0	0.477055	0.0540959	0.758367	1.54044e-22	0.0233265	0.00144276	0.000636116	0.800493
CLDN20	0	0	0	0	0.479541	0.0547345	0.758285	1.51472e-22	0.0233483	0.00153534	0.000677044	0.800493
IRF3	0	0	0	0	0.481531	0.0541866	0.759071	1.50165e-22	0.0233932	-0.00229394	0.00101189	0.800493
CCDC191	0	0	0	0	0.481399	0.053247	0.763857	1.74495e-22	0.0233984	0.000600195	0.000264765	0.800493
ANKRD22	0	0	0	0	0.480682	0.0532313	0.758234	1.46127e-22	0.0234452	-0.00171818	0.000758199	0.800493
SOX21	0	0	0	0	0.481333	0.0533656	0.761927	1.58116e-22	0.0234948	0.00366323	0.00161709	0.800493
QSOX1	0	0	0	0	0.476145	0.0521836	0.760295	1.27069e-22	0.0235637	-0.00105055	0.000463985	0.800493
TTYH2	0	0	0	0	0.477064	0.0520797	0.753066	1.60898e-22	0.0235867	0.000902766	0.00039878	0.800493
IL1F10	0	0	0	0	0.479252	0.0526833	0.759362	1.89946e-22	0.0235877	0.00118216	0.000522202	0.800493
SOX7	0	0	0	0	0.480049	0.0516736	0.756659	1.64209e-22	0.0235939	-0.00255023	0.00112658	0.800493
KRTAP10-9	0	0	0	0	0.477664	0.0539742	0.758957	1.6006e-22	0.0235962	-0.00230978	0.00102037	0.800493
AXIN2	0	0	0	0	0.479821	0.0533399	0.759381	1.89015e-22	0.0236904	0.000921245	0.000407245	0.800493
KRTAP5-7	0	0	0	0	0.486633	0.0533346	0.753509	1.4235e-22	0.023692	0.00221758	0.000980311	0.800493
XYLT2	0	0	0	0	0.470385	0.0511693	0.76198	1.69605e-22	0.0237262	0.0011205	0.000495453	0.800493
NEFL	0	0	0	0	0.479423	0.0525074	0.765777	1.6741e-22	0.0237388	-0.00373221	0.00165043	0.800493
SDCBP2	0	0	0	0	0.486026	0.0532089	0.757928	1.59071e-22	0.023782	-0.000532753	0.000235663	0.800493
ZP1	0	0	0	0	0.489066	0.0526517	0.760818	1.27363e-22	0.0237995	-0.0014431	0.000638435	0.800493
OR6C3	0	0	0	0	0.48343	0.0539937	0.772732	1.81558e-22	0.023822	-0.00170081	0.000752568	0.800493
LAMB4	0	0	0	0	0.474071	0.0525785	0.758717	1.81413e-22	0.023832	0.000735234	0.000325346	0.800493
ZNF250	0	0	0	0	0.47785	0.0521002	0.762985	1.54888e-22	0.0238506	0.00309201	0.00136842	0.800493
CCDC3	0	0	0	0	0.474825	0.0520534	0.758619	1.3682e-22	0.0238774	-0.00163983	0.000725872	0.800493
C11orf49	0	0	0	0	0.477222	0.05208	0.754124	1.478e-22	0.0239389	0.000965231	0.000427446	0.800493
ZNF417	0	0	0	0	0.486281	0.0523481	0.753706	1.22231e-22	0.0239591	0.000795998	0.000352553	0.800493
NDUFAF3	0	0	0	0	0.481269	0.0537686	0.757649	1.61501e-22	0.0239879	0.00348098	0.00154206	0.800493
VSTM5	0	0	0	0	0.479547	0.0557651	0.748496	1.41941e-22	0.0240039	0.00168527	0.000746654	0.800493
LRRC10B	0	0	0	0	0.480561	0.0526152	0.761853	1.78683e-22	0.0240286	-0.00138076	0.000611851	0.800493
VPS54	0	0	0	0	0.474347	0.0536826	0.760412	1.63821e-22	0.0241813	-0.00101753	0.000451382	0.804136
API5	0	0	0	0	0.478508	0.0527222	0.76152	1.57356e-22	0.0242809	-0.00261467	0.00116069	0.806003
KRTAP21-2	0	0	0	0	0.479832	0.0520551	0.751025	1.42515e-22	0.0243859	-0.00132459	0.000588438	0.807782
PPM1A	0	0	0	0	0.483352	0.0529386	0.753476	1.43563e-22	0.0244453	-0.00528362	0.00234819	0.807782
MORC2	0	0	0	0	0.479295	0.0536895	0.761537	1.40657e-22	0.0245195	-0.001597	0.000710121	0.807782
OR6C68	0	0	0	0	0.48071	0.0516518	0.758162	1.46418e-22	0.0245625	-0.0013573	0.000603717	0.807782
ZBP1	0	0	0	0	0.477571	0.0534047	0.758281	1.55913e-22	0.024583	0.00130216	0.000579275	0.807782
RER1	0	0	0	0	0.481064	0.0532287	0.75963	1.522e-22	0.0246236	0.005376	0.00239222	0.807782
ALDH8A1	0	0	0	0	0.480693	0.0519887	0.754036	1.448e-22	0.0246392	0.00132248	0.000588545	0.807782
SAMD9L	0	0	0	0	0.477235	0.0525141	0.75565	1.47366e-22	0.0246845	0.00114371	0.000509145	0.80784
AXL	0	0	0	0	0.481315	0.0526809	0.75281	1.42671e-22	0.0248653	0.000651974	0.000290604	0.80926
ARHGAP26	0	0	0	0	0.477587	0.0520926	0.746548	1.49853e-22	0.0249386	0.00167129	0.000745322	0.80926
SDCBP	0	0	0	0	0.477899	0.0523936	0.752382	1.50227e-22	0.0249533	-0.00230144	0.00102644	0.80926
ZNF48	0	0	0	0	0.478446	0.0534357	0.758854	1.43475e-22	0.0249731	0.00128172	0.000571726	0.80926
LMAN1	0	0	0	0	0.482373	0.052736	0.757286	1.53667e-22	0.0250049	0.0017867	0.000797151	0.80926
GYPA	0	0	0	0	0.47793	0.0532878	0.755548	1.38064e-22	0.0250203	0.00123065	0.000549126	0.80926
CD207	0	0	0	0	0.485527	0.052581	0.761662	1.33749e-22	0.0251159	-0.00141706	0.000632716	0.80926
BAIAP2	0	0	0	0	0.481943	0.0521095	0.758848	1.38397e-22	0.0251382	-0.00236964	0.00105821	0.80926
CLDN9	0	0	0	0	0.478813	0.0524423	0.755846	1.29066e-22	0.0251401	-0.00217875	0.000972972	0.80926
HSPA4	0	0	0	0	0.483024	0.0535814	0.75328	1.33521e-22	0.0251908	-0.000754529	0.000337071	0.80926
PLCB2	0	0	0	0	0.482379	0.052751	0.767969	1.73972e-22	0.025208	0.000585171	0.000261444	0.80926
NUDCD2	0	0	0	0	0.480558	0.0516128	0.761828	1.99453e-22	0.025285	-0.00339045	0.00151559	0.80926
IL12A	0	0	0	0	0.477669	0.0532551	0.75663	1.78892e-22	0.0252987	0.00452137	0.00202132	0.80926
PTCH2	0	0	0	0	0.482705	0.0517797	0.754931	2.34578e-22	0.0253385	0.000734765	0.000328573	0.80926
COG2	0	0	0	0	0.47899	0.0535627	0.75841	1.5368e-22	0.025408	-0.00129654	0.000580063	0.809971
SDC1	0	0	0	0	0.478759	0.052577	0.756488	1.69556e-22	0.0255334	-0.00194262	0.000869856	0.809971
EFCAB8	0	0	0	0	0.478619	0.0543412	0.74965	1.28775e-22	0.02559	-0.00160473	0.000718835	0.809971
ZFP62	0	0	0	0	0.478605	0.0540004	0.752922	1.39548e-22	0.0255988	-0.00145503	0.000651817	0.809971
HBE1	0	0	0	0	0.481901	0.0531171	0.762275	1.76144e-22	0.025632	0.00405594	0.00181736	0.809971
CCR7	0	0	0	0	0.484889	0.0531602	0.756978	1.37042e-22	0.025675	0.00207901	0.000931825	0.809971
GTDC1	0	0	0	0	0.477528	0.0525815	0.751451	1.51546e-22	0.025699	-0.00114576	0.000513619	0.809971
LEUTX	0	0	0	0	0.478092	0.0524871	0.747807	1.43386e-22	0.0257774	0.00978033	0.00438664	0.809971
HELT	0	0	0	0	0.477359	0.0522131	0.756893	1.62542e-22	0.0258135	0.00269555	0.00120929	0.809971
CHST9	0	0	0	0	0.485022	0.0527663	0.758906	1.65714e-22	0.0258361	-0.00153832	0.000690233	0.809971
ACTL9	0	0	0	0	0.472102	0.0524003	0.754882	1.6325e-22	0.0258648	0.00195254	0.000876262	0.809971
NEDD1	0	0	0	0	0.478178	0.0537884	0.754188	1.50156e-22	0.0258886	-0.00126144	0.000566202	0.809971
ANKRD17	0	0	0	0	0.485011	0.0533036	0.753153	1.47429e-22	0.0259281	0.00155963	0.000700232	0.809971
C17orf98	0	0	0	0	0.473279	0.0531241	0.757227	1.49906e-22	0.0260045	0.00315846	0.00141879	0.810647
MFSD3	0	0	0	0	0.483157	0.0530024	0.75542	1.65831e-22	0.0260436	-0.00127881	0.000574595	0.810647
MOCS2	0	0	0	0	0.479456	0.0544113	0.752631	1.43868e-22	0.0260809	-0.000776695	0.000349072	0.810647
SH3TC1	0	0	0	0	0.480856	0.0517553	0.749326	1.69763e-22	0.0262404	-0.00054064	0.00024324	0.813005
VPS53	0	0	0	0	0.479896	0.052804	0.758259	1.37823e-22	0.026259	-0.00107827	0.000485184	0.813005
SPANXN2	0	0	0	0	0.47688	0.0537363	0.75379	1.65438e-22	0.0263111	-0.00658588	0.00296445	0.813005
ACSS3	0	0	0	0	0.476945	0.0528295	0.763877	1.55452e-22	0.026332	-0.000940506	0.000423402	0.813005
LDLRAP1	0	0	0	0	0.484468	0.053185	0.757194	1.28683e-22	0.0265206	0.00160473	0.000723329	0.813387
MZB1	0	0	0	0	0.474423	0.0527395	0.760562	1.21724e-22	0.02664	0.00223526	0.00100834	0.813387
TNFRSF10C	0	0	0	0	0.480769	0.0522219	0.759821	1.7174e-22	0.0266403	-0.00536046	0.00241814	0.813387
TREM2	0	0	0	0	0.476901	0.0534497	0.753684	1.59774e-22	0.0267733	-0.00109491	0.000494352	0.813387
CTTNBP2NL	0	0	0	0	0.472651	0.0527614	0.75482	1.2292e-22	0.0268418	-0.00159707	0.000721407	0.813387
GMNN	0	0	0	0	0.48172	0.0534352	0.758088	1.49173e-22	0.0268672	0.00459027	0.00207379	0.813387
ATG10	0	0	0	0	0.479119	0.0538612	0.757038	1.38488e-22	0.0268756	-0.00258237	0.00116673	0.813387
TNNT1	0	0	0	0	0.478521	0.0529197	0.760575	1.69957e-22	0.0269328	0.00246285	0.00111314	0.813387
RASIP1	0	0	0	0	0.478364	0.0523437	0.757526	1.51712e-22	0.0269661	-0.000830974	0.000375661	0.813387
AIMP1	0	0	0	0	0.480073	0.0535421	0.757493	1.34325e-22	0.0270255	-0.00202989	0.000918015	0.813387
MAK16	0	0	0	0	0.479816	0.0538328	0.75675	1.22062e-22	0.0270737	-0.00198112	0.000896242	0.813387
SLC39A9	0	0	0	0	0.477377	0.0545078	0.761176	1.45907e-22	0.0271197	-0.00210607	0.000953052	0.813387
GMCL1	0	0	0	0	0.476224	0.051883	0.756567	1.39256e-22	0.0272386	-0.00207277	0.000938711	0.813387
LRRC70	0	0	0	0	0.477213	0.0520625	0.755272	1.58706e-22	0.027358	0.00264826	0.00120026	0.813387
TRIM66	0	0	0	0	0.481898	0.0528297	0.756204	1.38128e-22	0.0273768	0.000627239	0.000284317	0.813387
TYK2	0	0	0	0	0.476516	0.0523495	0.762933	2.11766e-22	0.0273961	0.000604852	0.000274203	0.813387
PSME1	0	0	0	0	0.481215	0.0533854	0.767821	1.76082e-22	0.0274078	0.00222323	0.00100795	0.813387
EIF3A	0	0	0	0	0.478717	0.0523364	0.758373	1.59045e-22	0.0274988	-0.000718772	0.000326064	0.813387
CYP2D6	0	0	0	0	0.481558	0.0533575	0.759343	1.45159e-22	0.0275059	0.00111334	0.000505079	0.813387
GIPC1	0	0	0	0	0.472798	0.0541252	0.761256	1.28132e-22	0.0275148	-0.00173164	0.000785625	0.813387
PRDM10	0	0	0	0	0.482092	0.053695	0.75841	1.66219e-22	0.0275313	0.000844432	0.000383149	0.813387
STRC	0	0	0	0	0.480309	0.0516333	0.75605	1.62071e-22	0.0275453	0.000724471	0.000328748	0.813387
TMEM261	0	0	0	0	0.485025	0.0520231	0.753718	1.70928e-22	0.027604	-0.00386924	0.00175644	0.813387
CIR1	0	0	0	0	0.481724	0.0522722	0.767503	1.82604e-22	0.0276127	0.00146652	0.000665762	0.813387
METTL1	0	0	0	0	0.478608	0.053458	0.75811	1.51413e-22	0.0276369	-0.00171179	0.00077723	0.813387
RIPOR2	0	0	0	0	0.487017	0.0529667	0.746896	1.40599e-22	0.0276475	0.000656657	0.000298172	0.813387
SRCAP	0	0	0	0	0.481523	0.0519903	0.757759	1.67819e-22	0.0276742	0.00073785	0.000335097	0.813387
NLRC5	0	0	0	0	0.482664	0.0529058	0.751586	1.22406e-22	0.0278196	-0.0013557	0.000616269	0.813387
FOSB	0	0	0	0	0.484312	0.0528244	0.755178	1.41221e-22	0.0278509	-0.00258645	0.00117598	0.813387
APOBEC3C	0	0	0	0	0.477043	0.0523791	0.758513	1.35151e-22	0.0279204	-0.00317585	0.0014446	0.813387
TEX35	0	0	0	0	0.475091	0.0534756	0.765683	1.57304e-22	0.0279213	-0.000918697	0.000417891	0.813387
MPZL1	0	0	0	0	0.477275	0.0546257	0.760274	1.5443e-22	0.0279268	-0.00235528	0.00107139	0.813387
SNX29	0	0	0	0	0.474552	0.0522503	0.756003	1.73586e-22	0.0279574	0.000934413	0.000425138	0.813387
EID2	0	0	0	0	0.474802	0.0523791	0.748935	1.39154e-22	0.0279616	-0.0022246	0.00101217	0.813387
NCOA7	0	0	0	0	0.482169	0.0528431	0.755225	1.26026e-22	0.0280011	-0.000984791	0.000448184	0.813387
CXADR	0	0	0	0	0.484917	0.0529942	0.761026	1.30944e-22	0.0280062	0.00217304	0.000988994	0.813387
PATZ1	0	0	0	0	0.47908	0.0532051	0.756554	1.33999e-22	0.0280823	-0.00229599	0.00104546	0.813387
ESPL1	0	0	0	0	0.470823	0.0528306	0.749337	2.12684e-22	0.0282945	0.000879681	0.000401094	0.813387
PTPN9	0	0	0	0	0.481801	0.0530701	0.759056	1.54559e-22	0.0283262	-0.00180847	0.000824747	0.813387
PKDREJ	0	0	0	0	0.479749	0.0535528	0.752355	1.41623e-22	0.0283746	0.000973572	0.000444129	0.813387
NME1	0	0	0	0	0.488501	0.0533551	0.74852	1.68445e-22	0.0283901	0.00422386	0.00192705	0.813387
ACTR3B	0	0	0	0	0.479794	0.0524743	0.761056	1.44103e-22	0.0284439	-0.00328188	0.0014978	0.813387
C10orf55	0	0	0	0	0.482558	0.0527408	0.759607	1.52759e-22	0.0284524	0.00795512	0.00363079	0.813387
ESM1	0	0	0	0	0.479894	0.0530498	0.750486	1.59291e-22	0.0285824	0.00537224	0.00245395	0.813387
ELP6	0	0	0	0	0.483268	0.0535417	0.759056	1.77227e-22	0.0286618	0.00120244	0.00054953	0.813387
CABIN1	0	0	0	0	0.48605	0.0528508	0.751457	9.79912e-23	0.0287341	-0.000524671	0.000239889	0.813387
SRI	0	0	0	0	0.481019	0.0526255	0.754363	1.4066e-22	0.0287416	-0.00276417	0.00126389	0.813387
C1orf141	0	0	0	0	0.480829	0.052298	0.764306	1.80179e-22	0.0287423	-0.00211234	0.000965852	0.813387
CHPF2	0	0	0	0	0.482902	0.0534412	0.768893	1.7893e-22	0.0287691	0.000551482	0.000252203	0.813387
MSANTD4	0	0	0	0	0.476884	0.0527479	0.75213	1.68826e-22	0.0287727	0.00364638	0.00166759	0.813387
RAD51AP2	0	0	0	0	0.485659	0.0523434	0.762229	1.69982e-22	0.0289657	0.0012945	0.000592724	0.813387
ZNF324B	0	0	0	0	0.483009	0.0532268	0.759943	1.58073e-22	0.0289682	0.00178748	0.000818465	0.813387
ERICH5	0	0	0	0	0.485588	0.0517749	0.763421	1.43866e-22	0.0290363	-0.00133348	0.000610841	0.813387
MOCS1	0	0	0	0	0.48089	0.0530398	0.751453	1.45728e-22	0.0290402	0.000824445	0.000377672	0.813387
FGFBP2	0	0	0	0	0.477081	0.0529267	0.759956	1.47608e-22	0.0291749	-0.00399951	0.00183368	0.813387
FRG2	0	0	0	0	0.48233	0.0541359	0.760177	1.30228e-22	0.0291764	-0.00252305	0.00115677	0.813387
SLC30A10	0	0	0	0	0.480077	0.0533396	0.760768	1.5011e-22	0.0294436	-0.0015369	0.000705805	0.813387
MYLPF	0	0	0	0	0.48243	0.0539022	0.766993	1.52697e-22	0.0295299	0.00346282	0.00159111	0.813387
XKR7	0	0	0	0	0.476767	0.0526581	0.764977	1.74522e-22	0.0295516	0.00156345	0.000718475	0.813387
ATP2B4	0	0	0	0	0.480091	0.0517548	0.757091	1.75591e-22	0.0295787	0.000988212	0.000454202	0.813387
ZNF385B	0	0	0	0	0.476661	0.0525991	0.752237	1.49263e-22	0.0295874	-0.00154923	0.000712096	0.813387
HELB	0	0	0	0	0.476658	0.0531417	0.761936	1.4555e-22	0.0296075	0.000887069	0.000407787	0.813387
BEND6	0	0	0	0	0.478456	0.0530598	0.763361	1.57715e-22	0.0296695	0.00127361	0.000585702	0.813387
SLC22A25	0	0	0	0	0.484624	0.0529828	0.758154	1.52087e-22	0.0297537	0.00120605	0.000554921	0.813387
ACE	0	0	0	0	0.472375	0.0523624	0.759216	1.68099e-22	0.0297662	0.000429628	0.000197693	0.813387
MSANTD3	0	0	0	0	0.478224	0.0529158	0.762897	1.65592e-22	0.0297686	0.00287394	0.00132246	0.813387
TXNL1	0	0	0	0	0.483448	0.0528074	0.747298	1.58657e-22	0.0297909	0.00303705	0.00139771	0.813387
LDHB	0	0	0	0	0.47725	0.0512498	0.756225	1.36953e-22	0.0298276	-0.00228538	0.00105201	0.813387
C9orf16	0	0	0	0	0.486466	0.0524624	0.758811	1.74829e-22	0.0298691	-0.00341008	0.00157013	0.813387
MIB2	0	0	0	0	0.487173	0.0541217	0.756551	1.30262e-22	0.0298787	-0.000900614	0.000414701	0.813387
ATAD3B	0	0	0	0	0.484985	0.0529341	0.748717	1.38215e-22	0.029899	-0.000958697	0.000441501	0.813387
CTHRC1	0	0	0	0	0.478826	0.0520516	0.756808	1.39331e-22	0.0299516	0.00214434	0.000987831	0.813387
NUB1	0	0	0	0	0.48272	0.0523682	0.757636	1.54918e-22	0.0299666	0.00133763	0.000616263	0.813387
URGCP	0	0	0	0	0.4804	0.0544755	0.753925	1.66902e-22	0.0299823	0.00108963	0.000502054	0.813387
TMEM270	0	0	0	0	0.477895	0.0536996	0.752909	1.60511e-22	0.030139	-0.00213185	0.000983196	0.813387
VCX	0	0	0	0	0.478308	0.0524106	0.753456	1.46386e-22	0.0301597	-0.00827782	0.00381816	0.813387
SLC16A6	0	0	0	0	0.480562	0.052492	0.749203	1.50289e-22	0.0302546	0.00211085	0.000974193	0.813387
NEUROG1	0	0	0	0	0.479407	0.0532088	0.751891	1.54247e-22	0.0303339	-0.00305249	0.00140945	0.813387
SPDYA	0	0	0	0	0.478792	0.0535376	0.759546	1.264e-22	0.0303604	-0.00445431	0.00205706	0.813387
ANKUB1	0	0	0	0	0.48393	0.0530991	0.753844	1.66053e-22	0.0303933	-0.00104867	0.000484384	0.813387
BEX5	0	0	0	0	0.485817	0.0529013	0.753	1.56344e-22	0.0304265	-0.00717119	0.00331307	0.813387
PITX2	0	0	0	0	0.480811	0.0529832	0.751069	1.5007e-22	0.0304311	-0.00216932	0.00100225	0.813387
MRPS35	0	0	0	0	0.481044	0.052775	0.760624	1.38066e-22	0.030442	-0.0013558	0.000626432	0.813387
RBMXL2	0	0	0	0	0.476778	0.052463	0.760548	1.66063e-22	0.0304457	-0.00116208	0.000536938	0.813387
SYNE4	0	0	0	0	0.48685	0.0528759	0.746616	1.31995e-22	0.0305579	-0.000906473	0.000419119	0.813387
RSPH9	0	0	0	0	0.47829	0.0524714	0.753892	1.48449e-22	0.0305974	0.00283718	0.00131212	0.813387
RGS12	0	0	0	0	0.484174	0.0517262	0.751485	1.64114e-22	0.0306215	-0.000580495	0.000268501	0.813387
MTOR	0	0	0	0	0.490945	0.0533941	0.749462	1.57422e-22	0.0306249	0.000938421	0.000434065	0.813387
AIDA	0	0	0	0	0.483436	0.0525521	0.759967	1.54789e-22	0.030629	-0.00319173	0.00147636	0.813387
SLC22A13	0	0	0	0	0.478486	0.0522972	0.756912	1.41529e-22	0.0307039	0.00111277	0.000514952	0.813387
ZNF365	0	0	0	0	0.471875	0.0535951	0.758177	1.68242e-22	0.030713	0.00200286	0.00092691	0.813387
RNF130	0	0	0	0	0.474855	0.0521165	0.769133	2.06497e-22	0.0308262	-0.00149706	0.000693298	0.813387
KLF5	0	0	0	0	0.483622	0.0527381	0.760004	1.59771e-22	0.0308304	-0.00317262	0.0014693	0.813387
DCTN5	0	0	0	0	0.471908	0.0529486	0.762249	1.33082e-22	0.0308563	-0.00359682	0.00166601	0.813387
SIRT7	0	0	0	0	0.476394	0.052501	0.747261	1.31217e-22	0.0308603	-0.00180792	0.000837431	0.813387
GRXCR1	0	0	0	0	0.488267	0.053246	0.749791	1.28386e-22	0.030907	-0.00141278	0.000654582	0.813387
ARL6IP1	0	0	0	0	0.481367	0.0528203	0.75725	1.51337e-22	0.0309467	0.00306739	0.00142155	0.813387
ESRRB	0	0	0	0	0.48242	0.0535539	0.76567	1.63877e-22	0.0309962	-0.00192832	0.000893921	0.813387
NRIP2	0	0	0	0	0.48436	0.0523157	0.750321	1.34823e-22	0.031038	-0.000925382	0.000429091	0.813387
DYDC1	0	0	0	0	0.475941	0.0534839	0.75306	1.71769e-22	0.0310947	0.00296593	0.00137574	0.813387
KRT35	0	0	0	0	0.474835	0.0531303	0.766344	1.5032e-22	0.0311302	0.00100854	0.000467907	0.813387
PRSS35	0	0	0	0	0.478279	0.052144	0.761332	1.4946e-22	0.031156	0.00190098	0.000882087	0.813387
CERS5	0	0	0	0	0.48103	0.0533889	0.753262	1.53709e-22	0.031167	0.000732594	0.000339958	0.813387
BTNL9	0	0	0	0	0.474394	0.052336	0.756147	1.42661e-22	0.0311801	0.00160268	0.000743777	0.813387
SH3BP1	0	0	0	0	0.478128	0.0523034	0.755855	1.83641e-22	0.0312236	-0.000956353	0.000443941	0.813387
VWA3B	0	0	0	0	0.485433	0.0529226	0.752317	1.48797e-22	0.0312447	0.000877168	0.000407234	0.813387
ARSJ	0	0	0	0	0.477536	0.0531717	0.755128	1.61782e-22	0.0313428	-0.000991379	0.000460525	0.813387
PDPK1	0	0	0	0	0.479614	0.0533687	0.76112	1.6122e-22	0.0313608	0.00370844	0.00172286	0.813387
RELN	0	0	0	0	0.481281	0.0511579	0.761122	1.38172e-22	0.031472	-0.000424778	0.000197473	0.813387
NR1H2	0	0	0	0	0.479982	0.054248	0.762356	1.38147e-22	0.0314805	-0.00189737	0.0008821	0.813387
RAD51B	0	0	0	0	0.48869	0.0531484	0.758255	1.66499e-22	0.0315923	0.00160388	0.000746144	0.813387
TMEM14C	0	0	0	0	0.480276	0.0522975	0.752437	1.29688e-22	0.0316148	-0.00223367	0.00103927	0.813387
ZNF141	0	0	0	0	0.481414	0.0548591	0.751386	1.46316e-22	0.031627	0.00123396	0.000574173	0.813387
INSR	0	0	0	0	0.486839	0.0534213	0.756364	1.25199e-22	0.0317079	-0.000680259	0.00031668	0.813387
AP4E1	0	0	0	0	0.476827	0.0533654	0.763087	1.43366e-22	0.0317387	0.00100937	0.000469974	0.813387
LRRC3C	0	0	0	0	0.474709	0.0523847	0.764617	1.55744e-22	0.0317571	-0.00129607	0.000603531	0.813387
BCORL1	0	0	0	0	0.477592	0.0524264	0.753578	1.40055e-22	0.0318013	-0.00147589	0.000687446	0.813387
ENDOD1	0	0	0	0	0.481445	0.0521237	0.760403	1.62627e-22	0.0318181	0.00139501	0.000649835	0.813387
ERP44	0	0	0	0	0.472305	0.0524643	0.757031	1.37045e-22	0.0318217	-0.0020216	0.000941739	0.813387
C16orf92	0	0	0	0	0.484006	0.0522172	0.757857	1.6676e-22	0.031865	-0.00478123	0.00222784	0.813387
ACPP	0	0	0	0	0.485402	0.0521545	0.758644	1.49902e-22	0.0318661	-0.00153485	0.000715178	0.813387
S1PR4	0	0	0	0	0.475269	0.0526736	0.757731	1.53443e-22	0.0318699	0.00166197	0.000774428	0.813387
PCDHB7	0	0	0	0	0.480686	0.0530027	0.754535	1.37942e-22	0.0319382	-0.000380348	0.000177301	0.813387
KIF12	0	0	0	0	0.476504	0.0529164	0.76312	1.39054e-22	0.0319591	0.00157617	0.000734831	0.813387
ARFRP1	0	0	0	0	0.47692	0.0529397	0.761678	1.59932e-22	0.0320274	0.00277848	0.00129588	0.813387
KCNA1	0	0	0	0	0.486509	0.0530226	0.757784	1.45633e-22	0.0320723	-0.00303715	0.00141689	0.813387
APLN	0	0	0	0	0.483614	0.0527835	0.75161	1.43264e-22	0.0321585	0.00544542	0.00254167	0.813387
ANAPC7	0	0	0	0	0.47074	0.0524766	0.757899	1.1848e-22	0.0322259	-0.00252246	0.00117783	0.813387
BMP3	0	0	0	0	0.479058	0.0539289	0.760658	1.47923e-22	0.0322571	0.00178953	0.000835747	0.813387
RNF146	0	0	0	0	0.475554	0.0545131	0.755107	1.39489e-22	0.0323295	-0.00260746	0.00121825	0.813387
SDE2	0	0	0	0	0.484842	0.0526671	0.757156	1.7894e-22	0.0324905	0.00101371	0.000474063	0.813387
NDUFA6	0	0	0	0	0.48596	0.0535094	0.759341	1.50847e-22	0.0326922	-0.00359447	0.00168291	0.813387
BCL2L15	0	0	0	0	0.474102	0.0512433	0.762969	1.36154e-22	0.0327429	0.00293863	0.00137625	0.813387
CDKN2AIPNL	0	0	0	0	0.475779	0.0526273	0.757435	1.56111e-22	0.0327807	-0.00313567	0.00146885	0.813387
C15orf41	0	0	0	0	0.481588	0.0522074	0.754699	1.38231e-22	0.0329185	0.00170094	0.000797403	0.813387
LLGL2	0	0	0	0	0.483413	0.0540373	0.764039	1.45825e-22	0.0329484	-0.000638154	0.000299219	0.813387
RD3	0	0	0	0	0.467507	0.05292	0.760686	1.53956e-22	0.0330118	0.000949166	0.000445208	0.813387
SPP1	0	0	0	0	0.47914	0.0549365	0.758228	1.68716e-22	0.0330333	-0.00120332	0.000564486	0.813387
ABCB11	0	0	0	0	0.475983	0.0536111	0.756572	1.40098e-22	0.0330357	0.000851977	0.000399676	0.813387
C22orf15	0	0	0	0	0.479753	0.0543284	0.757559	1.81656e-22	0.033163	0.00229877	0.00107917	0.813387
NPR3	0	0	0	0	0.480199	0.0527579	0.757719	1.51899e-22	0.0331721	-0.000918447	0.000431193	0.813387
FBXO31	0	0	0	0	0.477	0.0532562	0.760004	1.49557e-22	0.0332354	-0.00195243	0.000916957	0.813387
SPTBN1	0	0	0	0	0.484445	0.052553	0.761996	1.69599e-22	0.0333376	-0.00075727	0.000355857	0.813387
QRICH1	0	0	0	0	0.478074	0.0535671	0.752439	1.741e-22	0.0333917	0.00256747	0.00120688	0.813387
OGFRL1	0	0	0	0	0.479877	0.0529755	0.759146	1.52947e-22	0.0334121	0.00213063	0.00100165	0.813387
UMODL1	0	0	0	0	0.475379	0.0527177	0.763503	1.24272e-22	0.0334171	-0.00067509	0.000317382	0.813387
LRTM1	0	0	0	0	0.482781	0.0532085	0.757057	1.65486e-22	0.0334803	0.00206268	0.000970081	0.813387
EIF4A1	0	0	0	0	0.474346	0.0519791	0.750262	1.46089e-22	0.0335097	0.00441407	0.00207629	0.813387
C17orf100	0	0	0	0	0.479646	0.0524469	0.756008	1.65819e-22	0.0335329	0.00288538	0.0013574	0.813387
PAN3	0	0	0	0	0.480578	0.0537881	0.756157	1.49874e-22	0.033618	0.00105668	0.000497343	0.813387
ARMC2	0	0	0	0	0.471975	0.0538168	0.766063	1.65371e-22	0.033668	0.00119605	0.000563098	0.813387
GUCA1C	0	0	0	0	0.481547	0.0529545	0.757028	1.47237e-22	0.0336733	0.0033053	0.00155618	0.813387
INHBE	0	0	0	0	0.47589	0.0526612	0.75565	1.38842e-22	0.0337477	0.00122772	0.000578268	0.813387
ARID5A	0	0	0	0	0.479681	0.0513661	0.755778	2.03126e-22	0.0337555	-0.00121732	0.000573397	0.813387
MFAP3	0	0	0	0	0.477773	0.0526868	0.756599	1.93499e-22	0.0337941	-0.00176592	0.000831982	0.813387
PDLIM7	0	0	0	0	0.47658	0.0528986	0.753072	1.24888e-22	0.0338467	-0.000738354	0.000347966	0.813387
HECA	0	0	0	0	0.479627	0.0532928	0.759605	1.62591e-22	0.0338522	-0.00275188	0.00129692	0.813387
MIPEP	0	0	0	0	0.476789	0.0523354	0.754557	1.90373e-22	0.0341046	-0.000818809	0.00038644	0.813387
OVOL1	0	0	0	0	0.472991	0.0532029	0.761043	1.4238e-22	0.0341145	0.00125575	0.000592689	0.813387
DHX29	0	0	0	0	0.483941	0.0532848	0.764105	1.45678e-22	0.0341467	-0.000861965	0.000406903	0.813387
ASTN1	0	0	0	0	0.476871	0.0532707	0.76058	1.14966e-22	0.0341896	-0.000720383	0.000340148	0.813387
HSF1	0	0	0	0	0.480878	0.0527227	0.754011	1.68272e-22	0.0342156	-0.00193766	0.000915051	0.813387
TRIM49B	0	0	0	0	0.475342	0.0525555	0.754889	1.5413e-22	0.0342896	0.00353868	0.00167181	0.813387
OR51I1	0	0	0	0	0.482779	0.053121	0.752592	1.39211e-22	0.0342992	-0.00154519	0.000730051	0.813387
FOLH1	0	0	0	0	0.486048	0.0530522	0.75312	1.54845e-22	0.0343497	0.00091942	0.000434516	0.813387
TRIM3	0	0	0	0	0.475609	0.0539286	0.757815	1.47282e-22	0.0343517	-0.00189696	0.000896508	0.813387
PPP5C	0	0	0	0	0.479693	0.053067	0.758653	1.36466e-22	0.0344369	-0.00226029	0.00106873	0.813387
A1CF	0	0	0	0	0.475985	0.0518939	0.757082	1.38127e-22	0.0344977	0.00102109	0.000482959	0.813387
CXCL3	0	0	0	0	0.476758	0.0535352	0.755731	1.55469e-22	0.0345028	-0.00274683	0.00129925	0.813387
CYP24A1	0	0	0	0	0.475661	0.0539843	0.758584	1.68639e-22	0.0345305	-0.000634846	0.000300328	0.813387
JPH4	0	0	0	0	0.472932	0.0531704	0.749134	1.4098e-22	0.0345794	-0.00160846	0.000761124	0.813387
TMEM256	0	0	0	0	0.478867	0.0514802	0.756605	1.49334e-22	0.0346094	-0.0025233	0.00119422	0.813387
CEP290	0	0	0	0	0.472348	0.0525488	0.765382	2.15618e-22	0.0346106	-0.000363022	0.000171812	0.813387
GAA	0	0	0	0	0.484342	0.0531145	0.755348	1.53036e-22	0.0346125	-0.00090303	0.000427392	0.813387
ZNF780A	0	0	0	0	0.479728	0.0528489	0.761126	1.65824e-22	0.0347641	-0.000900784	0.000426686	0.813387
IGSF9B	0	0	0	0	0.479392	0.0518673	0.751289	1.28547e-22	0.0348437	-0.000758468	0.000359431	0.813387
C5orf24	0	0	0	0	0.479477	0.0525299	0.760548	1.62112e-22	0.0348604	0.00508362	0.0024093	0.813387
ATXN7L3	0	0	0	0	0.479646	0.0520271	0.75231	1.4026e-22	0.0349382	-0.00508544	0.00241119	0.813387
IL13RA2	0	0	0	0	0.47793	0.0539792	0.755701	1.59843e-22	0.0349408	0.00593858	0.00281574	0.813387
RAPGEF5	0	0	0	0	0.484271	0.0526589	0.760391	1.58443e-22	0.0349933	-0.00147892	0.000701422	0.813387
KLHL36	0	0	0	0	0.48165	0.0531413	0.756349	1.24322e-22	0.0350215	0.00108135	0.000512941	0.813387
ERCC1	0	0	0	0	0.472771	0.0529568	0.751666	1.50017e-22	0.035026	-0.00183961	0.000872646	0.813387
TSHZ2	0	0	0	0	0.474043	0.0525738	0.759188	1.44755e-22	0.0350621	-0.000752059	0.000356821	0.813387
SVIP	0	0	0	0	0.47759	0.0533487	0.758993	1.54674e-22	0.0350678	-0.0045842	0.00217509	0.813387
OR51D1	0	0	0	0	0.47876	0.0527698	0.760008	1.35112e-22	0.0350922	0.00150738	0.000715306	0.813387
NR0B2	0	0	0	0	0.477559	0.0541705	0.756727	1.29849e-22	0.0351147	-0.00204997	0.00097291	0.813387
FEV	0	0	0	0	0.481057	0.0526868	0.75952	1.53206e-22	0.0351247	0.00344999	0.00163744	0.813387
OR1L4	0	0	0	0	0.476497	0.0522011	0.756742	1.22687e-22	0.0351274	0.00192101	0.000911769	0.813387
PCDHB12	0	0	0	0	0.479216	0.0525526	0.753987	1.54065e-22	0.0351327	-0.000530107	0.000251611	0.813387
OR2T10	0	0	0	0	0.479091	0.0534201	0.751795	1.66132e-22	0.0351583	0.00385833	0.00183159	0.813387
GSTA3	0	0	0	0	0.472352	0.0545073	0.762177	1.98973e-22	0.035192	0.00199681	0.000948078	0.813387
RAD23A	0	0	0	0	0.474566	0.0530749	0.753885	1.57418e-22	0.0352029	0.00203069	0.000964221	0.813387
CNPY1	0	0	0	0	0.475585	0.0531874	0.755928	1.24617e-22	0.0352333	0.00202182	0.000960169	0.813387
DLD	0	0	0	0	0.479941	0.0523617	0.755724	1.41041e-22	0.0352614	0.00147417	0.000700198	0.813387
SNX5	0	0	0	0	0.476183	0.0526794	0.750508	1.36661e-22	0.0352616	0.00111783	0.000530944	0.813387
RPP40	0	0	0	0	0.471931	0.0513969	0.756838	1.40992e-22	0.0352688	-0.00150836	0.000716467	0.813387
HECTD4	0	0	0	0	0.473837	0.0521383	0.755291	1.59026e-22	0.0352858	0.000468389	0.000222503	0.813387
SHB	0	0	0	0	0.481845	0.0535706	0.754289	1.40883e-22	0.0353355	0.00076337	0.00036273	0.813387
TMEM56	0	0	0	0	0.480081	0.0524632	0.757665	1.29477e-22	0.0353455	-0.00703637	0.00334365	0.813387
THOP1	0	0	0	0	0.478861	0.0536373	0.757611	1.69245e-22	0.0353657	0.0010823	0.000514361	0.813387
OR52B2	0	0	0	0	0.4787	0.0532326	0.754899	1.61438e-22	0.0354142	-0.00150152	0.00071378	0.813387
PURB	0	0	0	0	0.480157	0.0537662	0.752514	1.39281e-22	0.0354168	0.00433342	0.00206002	0.813387
SRSF3	0	0	0	0	0.483093	0.0538709	0.756928	1.6255e-22	0.0354708	-0.0108955	0.00518103	0.813387
DEGS1	0	0	0	0	0.481784	0.0522778	0.749358	1.44236e-22	0.0355219	-0.00196529	0.000934793	0.813387
ACE2	0	0	0	0	0.480847	0.0532831	0.751382	1.51667e-22	0.0356432	0.00185815	0.000884415	0.813387
SLC26A7	0	0	0	0	0.479596	0.052096	0.767212	1.9483e-22	0.0357273	-0.000775687	0.000369368	0.813387
MDP1	0	0	0	0	0.480611	0.0529754	0.751452	1.50123e-22	0.0357728	0.00605148	0.00288231	0.813387
SEC22C	0	0	0	0	0.481989	0.0525041	0.752057	1.38217e-22	0.0357842	0.00258102	0.00122941	0.813387
NUMA1	0	0	0	0	0.474827	0.0533403	0.757933	1.47621e-22	0.0359228	-0.000495581	0.000236236	0.813387
PCDHGA8	0	0	0	0	0.47888	0.0534718	0.754519	1.51659e-22	0.0359434	-0.000623932	0.000297452	0.813387
CREB3	0	0	0	0	0.481281	0.0526867	0.754789	1.48836e-22	0.0359621	-0.00151235	0.000721069	0.813387
GAS1	0	0	0	0	0.478792	0.0544558	0.764486	1.46556e-22	0.0359742	-0.00174517	0.000832129	0.813387
ATG101	0	0	0	0	0.480003	0.0528996	0.759751	1.57159e-22	0.0359833	0.00275101	0.00131179	0.813387
PIEZO2	0	0	0	0	0.479588	0.0521831	0.751557	1.44841e-22	0.0359899	0.000521787	0.000248818	0.813387
OR2F2	0	0	0	0	0.471376	0.0538083	0.758875	1.44978e-22	0.0359968	-0.00320662	0.00152916	0.813387
CCDC112	0	0	0	0	0.483643	0.0534765	0.76021	1.73435e-22	0.0360756	-0.00142699	0.000680786	0.813387
CD276	0	0	0	0	0.47972	0.0527857	0.75658	1.39395e-22	0.036098	-0.000976833	0.000466081	0.813387
DGKZ	0	0	0	0	0.481352	0.0529367	0.755779	1.44706e-22	0.036114	0.000598719	0.000285694	0.813387
DIEXF	0	0	0	0	0.476014	0.0531045	0.745295	1.56332e-22	0.0361749	0.00116765	0.000557359	0.813387
MST1R	0	0	0	0	0.480342	0.0530648	0.756515	1.4163e-22	0.0363561	0.000770143	0.000367971	0.813387
PTPN21	0	0	0	0	0.476256	0.0529116	0.758243	1.52079e-22	0.0363769	-0.000887252	0.000423973	0.813387
PRSS12	0	0	0	0	0.482658	0.0532351	0.761487	1.6111e-22	0.0364794	-0.000576491	0.000275627	0.813387
ANXA9	0	0	0	0	0.479478	0.0531531	0.75751	1.45075e-22	0.0364853	-0.00114443	0.000547184	0.813387
MSH3	0	0	0	0	0.47766	0.0531648	0.75566	1.21187e-22	0.0365261	-0.000774176	0.000370234	0.813387
PCDHGB5	0	0	0	0	0.475321	0.0526415	0.762898	1.70283e-22	0.0365903	0.00221062	0.00105755	0.813387
TUFM	0	0	0	0	0.482267	0.0524083	0.763794	1.03959e-22	0.0365937	0.00155412	0.000743494	0.813387
FAM216B	0	0	0	0	0.475752	0.0534179	0.750682	1.67342e-22	0.0367748	0.00293647	0.00140617	0.813387
SEC14L2	0	0	0	0	0.474971	0.0540866	0.756975	1.53022e-22	0.0368734	-0.00174232	0.000834773	0.813387
RPL13A	0	0	0	0	0.475879	0.0530205	0.758953	1.66196e-22	0.0369372	0.00202418	0.000970142	0.813387
C3orf30	0	0	0	0	0.476623	0.0549837	0.75999	1.81858e-22	0.0370044	0.00316729	0.00151855	0.813387
CYP4F12	0	0	0	0	0.478411	0.0531433	0.759737	1.489e-22	0.0370362	-0.00112477	0.000539357	0.813387
APLF	0	0	0	0	0.481417	0.0532271	0.761401	1.56269e-22	0.0370588	0.00142478	0.000683302	0.813387
FAM71E1	0	0	0	0	0.47727	0.0523809	0.75645	1.86252e-22	0.0371275	0.00081042	0.000388806	0.813387
SNRPA	0	0	0	0	0.477738	0.0530471	0.755316	1.36498e-22	0.0371783	0.00330124	0.00158422	0.813387
NOL12	0	0	0	0	0.481659	0.0532956	0.750281	1.4843e-22	0.0372027	0.00168271	0.000807618	0.813387
RNF170	0	0	0	0	0.483322	0.0539693	0.755282	1.45103e-22	0.037273	-0.00243798	0.00117054	0.813387
ATP1A2	0	0	0	0	0.479818	0.0534632	0.758234	1.3598e-22	0.0373731	0.00134516	0.000646188	0.813387
APBA2	0	0	0	0	0.481538	0.0531804	0.752155	1.59588e-22	0.0373989	0.000884524	0.000424965	0.813387
PDE3B	0	0	0	0	0.483653	0.0525991	0.754652	1.39755e-22	0.0374358	-0.000567385	0.00027265	0.813387
SDR39U1	0	0	0	0	0.471236	0.0537462	0.763205	1.68221e-22	0.0374626	-0.000729541	0.000350622	0.813387
MIS12	0	0	0	0	0.476505	0.0541207	0.759596	1.42065e-22	0.0374702	-0.0027506	0.00132201	0.813387
SLC5A6	0	0	0	0	0.484331	0.0530936	0.756507	1.99024e-22	0.0375205	0.00152198	0.000731696	0.813387
CH25H	0	0	0	0	0.473826	0.0533261	0.755996	1.70819e-22	0.0375456	0.00357178	0.00171737	0.813387
MAP7D2	0	0	0	0	0.484743	0.0533823	0.757993	1.57876e-22	0.0375494	-0.00245328	0.0011796	0.813387
EGR2	0	0	0	0	0.478456	0.0526738	0.760912	1.55852e-22	0.0376858	-0.00268888	0.0012938	0.813387
RTL9	0	0	0	0	0.47614	0.0530822	0.757213	1.50156e-22	0.0378072	-0.00170473	0.000820782	0.813387
KCNA2	0	0	0	0	0.481569	0.0523154	0.764507	1.48168e-22	0.0378093	-0.00422455	0.00203403	0.813387
HLA-DRB5	0	0	0	0	0.474748	0.0534133	0.763027	1.29999e-22	0.0378212	-0.00205992	0.000991867	0.813387
GTF2A2	0	0	0	0	0.479058	0.0535779	0.75578	1.57321e-22	0.0378346	0.0076062	0.0036627	0.813387
SIN3B	0	0	0	0	0.476764	0.0530622	0.752228	1.19085e-22	0.0378705	-0.00106518	0.000513024	0.813387
GIMAP2	0	0	0	0	0.479702	0.0520132	0.761878	2.21047e-22	0.0379608	-0.00115144	0.000554831	0.813387
TSTA3	0	0	0	0	0.481932	0.0541399	0.756136	1.39544e-22	0.0380449	0.00127254	0.000613452	0.813387
MDM2	0	0	0	0	0.476848	0.0532788	0.760111	1.37979e-22	0.0380822	0.00227444	0.00109665	0.813387
DNAJC7	0	0	0	0	0.47795	0.0527925	0.753946	1.35753e-22	0.0381456	-0.00244205	0.00117785	0.813387
VPS13D	0	0	0	0	0.480181	0.0521734	0.76266	1.63257e-22	0.0382548	-0.000396791	0.000191489	0.813387
ANO7	0	0	0	0	0.480831	0.0523212	0.750277	1.36643e-22	0.0382659	0.000550111	0.000265495	0.813387
ZNF385A	0	0	0	0	0.479007	0.0532757	0.763302	1.37816e-22	0.0382703	-0.00216217	0.00104354	0.813387
COPG1	0	0	0	0	0.477996	0.0522239	0.758281	1.53675e-22	0.0382997	0.00100987	0.00048747	0.813387
NELL2	0	0	0	0	0.476695	0.052073	0.765756	1.36653e-22	0.038344	-0.000743003	0.000358734	0.813387
VSIG2	0	0	0	0	0.484448	0.0525917	0.763516	1.43952e-22	0.0383643	-0.00211993	0.00102364	0.813387
FAM214A	0	0	0	0	0.474054	0.0525009	0.763483	1.50643e-22	0.0383816	0.000929306	0.000448772	0.813387
PANK4	0	0	0	0	0.48146	0.0524197	0.767965	1.52658e-22	0.0384527	-0.00140786	0.000680121	0.813387
PRR5-ARHGAP8	0	0	0	0	0.477544	0.052712	0.757485	1.70877e-22	0.0384751	-0.00363157	0.00175457	0.813387
GSKIP	0	0	0	0	0.47576	0.0522492	0.747216	1.66965e-22	0.0385224	0.00354198	0.0017117	0.813387
LTF	0	0	0	0	0.483263	0.0527943	0.751073	1.35476e-22	0.0385492	-0.0010417	0.000503482	0.813387
GMNC	0	0	0	0	0.473546	0.0525295	0.765215	1.6806e-22	0.0385619	0.00143262	0.000692471	0.813387
ZIK1	0	0	0	0	0.480869	0.052216	0.750031	1.91801e-22	0.0385939	0.00270305	0.00130676	0.813387
RHOF	0	0	0	0	0.479799	0.053791	0.756956	1.42014e-22	0.0386354	-0.00155173	0.000750327	0.813387
CACHD1	0	0	0	0	0.47745	0.0546944	0.757639	1.48674e-22	0.038637	0.000724513	0.000350336	0.813387
KDM5A	0	0	0	0	0.484719	0.0534549	0.75693	1.67295e-22	0.0386638	0.000850736	0.000411427	0.813387
C2orf91	0	0	0	0	0.478294	0.0521054	0.758086	1.42902e-22	0.038688	-0.010218	0.00494218	0.813387
RBBP5	0	0	0	0	0.479361	0.0535867	0.761471	1.43099e-22	0.038774	-0.00403588	0.00195291	0.813387
BSPRY	0	0	0	0	0.475852	0.052536	0.756069	1.5503e-22	0.0388033	0.00101614	0.000491769	0.813387
EN2	0	0	0	0	0.472656	0.0528575	0.75568	1.6563e-22	0.0388071	-0.00178801	0.000865342	0.813387
METTL18	0	0	0	0	0.481474	0.0527696	0.757569	1.49534e-22	0.0388662	0.00249111	0.00120599	0.813387
USP13	0	0	0	0	0.470414	0.0521432	0.759015	1.34576e-22	0.038976	0.000863182	0.000418115	0.813387
PIM2	0	0	0	0	0.474739	0.0535135	0.755118	1.71294e-22	0.0390897	0.00565991	0.00274318	0.813387
OR10V1	0	0	0	0	0.482894	0.0529302	0.760317	1.68775e-22	0.0392148	0.00153358	0.000743752	0.813387
TAF8	0	0	0	0	0.478652	0.0533576	0.758504	1.46017e-22	0.0392455	-0.000837124	0.000406051	0.813387
NUP62CL	0	0	0	0	0.479608	0.0537478	0.75631	1.49628e-22	0.0392556	0.00848665	0.0041167	0.813387
LHFPL2	0	0	0	0	0.480201	0.0531952	0.763776	1.48977e-22	0.0392818	-0.00122385	0.000593745	0.813387
OR10R2	0	0	0	0	0.476957	0.0529048	0.753244	1.04022e-22	0.0392961	0.000710964	0.000344945	0.813387
GFI1	0	0	0	0	0.476094	0.0523645	0.751553	1.4413e-22	0.0393067	-0.0012944	0.000628051	0.813387
SNUPN	0	0	0	0	0.475614	0.0530755	0.760767	1.53534e-22	0.0393154	-0.000750611	0.000364217	0.813387
OTUB2	0	0	0	0	0.475613	0.0521869	0.761007	1.47931e-22	0.0393361	0.00213186	0.00103454	0.813387
FNDC11	0	0	0	0	0.477526	0.0535232	0.756565	1.46187e-22	0.0394393	-0.00153927	0.000747368	0.813387
OR2B6	0	0	0	0	0.48129	0.0527136	0.758117	1.38735e-22	0.0394477	-0.00298426	0.00144902	0.813387
HIST1H2AH	0	0	0	0	0.477033	0.0532696	0.756963	1.33739e-22	0.0394585	-0.00106264	0.000515999	0.813387
PSAT1	0	0	0	0	0.480268	0.0529469	0.760693	1.36826e-22	0.0394709	-0.00157864	0.000766602	0.813387
TG	0	0	0	0	0.483862	0.0518131	0.762441	1.79787e-22	0.0394756	0.000400223	0.000194357	0.813387
SLC7A8	0	0	0	0	0.477087	0.053179	0.757952	1.84192e-22	0.0395302	0.000706272	0.000343076	0.813387
OR10AG1	0	0	0	0	0.475398	0.0528462	0.757625	1.63458e-22	0.0395951	-0.00226355	0.0010999	0.813387
SYT2	0	0	0	0	0.482053	0.0521624	0.756693	1.73228e-22	0.039618	0.00182237	0.000885624	0.813387
GKN2	0	0	0	0	0.470687	0.0530716	0.756296	1.40602e-22	0.0396495	-0.0028794	0.00139953	0.813387
DDI1	0	0	0	0	0.47712	0.0524395	0.759375	1.54569e-22	0.0396647	0.00224512	0.00109132	0.813387
RIT1	0	0	0	0	0.484276	0.0533878	0.75765	1.53391e-22	0.0396688	-0.003211	0.00156086	0.813387
TNFAIP2	0	0	0	0	0.473825	0.0516483	0.749558	1.39577e-22	0.0397504	-0.00150455	0.000731659	0.813387
RTF1	0	0	0	0	0.479484	0.0525213	0.744221	1.53103e-22	0.0399311	0.00221966	0.0010804	0.813387
MYBPC1	0	0	0	0	0.478445	0.0526633	0.757558	1.8963e-22	0.0399627	0.0010337	0.000503226	0.813387
CASKIN1	0	0	0	0	0.477385	0.0517964	0.759693	1.41605e-22	0.0400109	-0.000668609	0.00032557	0.813387
CIART	0	0	0	0	0.484703	0.05299	0.74655	1.48096e-22	0.0400344	-0.00124242	0.000605052	0.813387
FAM213B	0	0	0	0	0.479895	0.0541259	0.761812	1.5777e-22	0.0401787	0.00282161	0.0013751	0.813387
GRAPL	0	0	0	0	0.47836	0.052895	0.761211	1.52595e-22	0.0402473	0.00873379	0.00425785	0.813387
OLAH	0	0	0	0	0.473671	0.053484	0.757455	1.84962e-22	0.0402671	0.000994361	0.000484814	0.813387
LALBA	0	0	0	0	0.477154	0.0535913	0.756013	1.68664e-22	0.0402872	-0.00485889	0.00236925	0.813387
SLC35F3	0	0	0	0	0.478484	0.0527112	0.749332	1.32929e-22	0.0402891	-0.0018494	0.000901796	0.813387
KDELR3	0	0	0	0	0.481431	0.053843	0.752697	1.42823e-22	0.0403106	-0.00109715	0.000535046	0.813387
TWF2	0	0	0	0	0.474346	0.0518364	0.754747	1.38378e-22	0.0403368	0.00150362	0.000733365	0.813387
SPTSSB	0	0	0	0	0.484734	0.0541253	0.756014	1.51373e-22	0.0403371	0.00656216	0.00320059	0.813387
CETN2	0	0	0	0	0.480187	0.051623	0.755136	1.49697e-22	0.0403421	-0.0090817	0.00442956	0.813387
C2orf50	0	0	0	0	0.479463	0.0537888	0.746168	1.39674e-22	0.0405329	0.00396933	0.00193787	0.813387
OLFM4	0	0	0	0	0.476567	0.0534564	0.759771	1.62149e-22	0.0405412	0.00167047	0.000815577	0.813387
OSTN	0	0	0	0	0.482118	0.0528117	0.759761	1.53724e-22	0.0405701	0.0035022	0.00171013	0.813387
ARMCX1	0	0	0	0	0.481677	0.0524421	0.761678	1.65364e-22	0.0405963	-0.00510881	0.00249496	0.813387
SOX3	0	0	0	0	0.479607	0.0536548	0.753758	1.52264e-22	0.0406349	0.00260818	0.00127399	0.813387
IL36G	0	0	0	0	0.47789	0.0529582	0.757664	1.29179e-22	0.040636	0.00380839	0.00186025	0.813387
MUC3A	0	0	0	0	0.479396	0.0521526	0.754337	1.36752e-22	0.0406566	0.00158607	0.000774812	0.813387
KRTAP9-4	0	0	0	0	0.48075	0.0536687	0.750953	1.36181e-22	0.0406606	-0.00234124	0.00114375	0.813387
C2orf88	0	0	0	0	0.476701	0.0521831	0.75572	1.45806e-22	0.0406766	-0.00386653	0.00188903	0.813387
JOSD2	0	0	0	0	0.483157	0.0538698	0.757769	1.66057e-22	0.040724	0.00268628	0.00131272	0.813387
C14orf37	0	0	0	0	0.479731	0.052855	0.756585	1.6901e-22	0.0407631	-0.00118499	0.000579188	0.813387
SLC23A3	0	0	0	0	0.480393	0.0539305	0.755533	1.61107e-22	0.0407653	0.00271134	0.00132524	0.813387
RBMXL1	0	0	0	0	0.486596	0.053315	0.750599	1.44308e-22	0.0407824	-0.000822947	0.000402271	0.813387
TRIM63	0	0	0	0	0.472117	0.0523098	0.761488	1.63059e-22	0.0408608	0.000625159	0.000305707	0.813387
MAT1A	0	0	0	0	0.479862	0.0523252	0.750133	1.23522e-22	0.0409188	-0.00207106	0.00101305	0.813387
UNC45A	0	0	0	0	0.478163	0.0516233	0.758733	1.55068e-22	0.0409364	-0.000625292	0.000305887	0.813387
ADCK2	0	0	0	0	0.480495	0.0523722	0.755447	1.49464e-22	0.0409849	-0.00100411	0.00049132	0.813387
PC	0	0	0	0	0.481439	0.0516211	0.761756	1.64419e-22	0.0410296	-0.000870973	0.000426268	0.813387
DES	0	0	0	0	0.476636	0.0520695	0.757448	1.28275e-22	0.0410835	-0.00130857	0.000640604	0.813387
PAIP2B	0	0	0	0	0.480841	0.0529589	0.760006	1.59364e-22	0.0410868	0.00507008	0.00248208	0.813387
INPP5D	0	0	0	0	0.47478	0.0534225	0.755619	1.23799e-22	0.0410974	-0.00128027	0.000626794	0.813387
PARP6	0	0	0	0	0.479822	0.0527826	0.758446	1.50431e-22	0.0411101	-0.00223873	0.00109611	0.813387
ZYG11B	0	0	0	0	0.475409	0.0520891	0.756173	1.41097e-22	0.0411458	0.00263923	0.00129242	0.813387
SLCO1B1	0	0	0	0	0.480277	0.0528302	0.757914	1.73392e-22	0.0413325	0.000966707	0.00047383	0.813387
TUBGCP4	0	0	0	0	0.481859	0.0538726	0.7499	1.5353e-22	0.0413432	-0.0011883	0.000582476	0.813387
EPHA1	0	0	0	0	0.479535	0.0530603	0.762251	1.72495e-22	0.0414034	0.000632355	0.000310056	0.813387
LIPN	0	0	0	0	0.483368	0.05333	0.760845	1.69693e-22	0.0414346	-0.000946884	0.000464347	0.813387
DHX30	0	0	0	0	0.478199	0.0520572	0.762762	1.48248e-22	0.0414587	0.00207749	0.00101891	0.813387
NKX2-8	0	0	0	0	0.480998	0.052503	0.753689	1.42261e-22	0.041459	-0.00212579	0.0010426	0.813387
SKP1	0	0	0	0	0.478863	0.0528831	0.760674	1.29391e-22	0.0415711	0.0134092	0.00658021	0.813387
ENAH	0	0	0	0	0.477141	0.0519903	0.755119	1.30907e-22	0.0415742	-0.00146942	0.00072109	0.813387
SRPK2	0	0	0	0	0.482768	0.0526498	0.753876	1.67651e-22	0.0416221	0.00196374	0.000963892	0.813387
P2RX4	0	0	0	0	0.486242	0.0532545	0.752765	1.33355e-22	0.0416425	-0.00083031	0.000407595	0.813387
CFTR	0	0	0	0	0.480037	0.0517664	0.755271	1.55814e-22	0.041669	-0.000340979	0.000167407	0.813387
SLC16A13	0	0	0	0	0.481578	0.0535393	0.74597	1.62604e-22	0.0417259	0.00181254	0.000890129	0.813387
HIST1H2BK	0	0	0	0	0.48956	0.0537689	0.755022	1.46416e-22	0.0417764	-0.00483124	0.00237319	0.813387
ZNF330	0	0	0	0	0.477729	0.0529103	0.750584	1.34541e-22	0.0418359	-0.00164736	0.000809446	0.813387
DBP	0	0	0	0	0.480003	0.0543607	0.757211	1.5033e-22	0.0419642	0.000801091	0.000393871	0.813387
KIAA1143	0	0	0	0	0.480967	0.0524948	0.753491	1.43987e-22	0.0419827	-0.00121569	0.000597771	0.813387
LAPTM5	0	0	0	0	0.484278	0.0526388	0.756194	1.64076e-22	0.0419979	-0.00107464	0.000528452	0.813387
ZNF592	0	0	0	0	0.484396	0.0539861	0.757557	1.64008e-22	0.042028	-0.000775931	0.000381619	0.813387
ANGPTL7	0	0	0	0	0.476676	0.053933	0.769951	2.11698e-22	0.0420466	0.000677907	0.000333439	0.813387
GM2A	0	0	0	0	0.48706	0.052441	0.757904	1.5998e-22	0.0420929	-0.00321207	0.00158026	0.813387
FKBP9	0	0	0	0	0.480676	0.0531435	0.746974	1.68588e-22	0.0421126	0.00101452	0.000499166	0.813387
HSCB	0	0	0	0	0.479887	0.0529121	0.750281	1.54604e-22	0.0421973	-0.00132908	0.000654205	0.813387
EMP1	0	0	0	0	0.481036	0.0529988	0.754541	1.7189e-22	0.0422581	0.00133576	0.000657687	0.813387
RAB31	0	0	0	0	0.480767	0.0533091	0.761257	1.43524e-22	0.0422831	0.00308571	0.0015195	0.813387
UNC80	0	0	0	0	0.482779	0.0522847	0.756363	1.53776e-22	0.0422936	-0.000452306	0.000222741	0.813387
ELOVL3	0	0	0	0	0.480246	0.0526948	0.744168	1.52141e-22	0.0423238	0.00117013	0.000576324	0.813387
CACNA1D	0	0	0	0	0.475605	0.0525509	0.753889	1.61608e-22	0.0424381	-0.000684311	0.000337229	0.813387
DDX56	0	0	0	0	0.489234	0.0535208	0.75373	1.48572e-22	0.0424453	-0.000706675	0.000348262	0.813387
INPP5E	0	0	0	0	0.47696	0.0526001	0.748335	1.37834e-22	0.0425543	0.00128218	0.000632217	0.813387
FDCSP	0	0	0	0	0.479332	0.0517958	0.755389	1.3902e-22	0.042582	-0.00674096	0.00332426	0.813387
KIF7	0	0	0	0	0.479652	0.0519228	0.75285	2.0216e-22	0.0425946	-0.000559539	0.00027595	0.813387
GALNT11	0	0	0	0	0.477953	0.052663	0.751852	1.49813e-22	0.0425997	0.000666018	0.000328471	0.813387
SLC2A5	0	0	0	0	0.483863	0.0524494	0.762047	1.75085e-22	0.0426348	-0.00116052	0.000572448	0.813387
ANAPC1	0	0	0	0	0.475481	0.0521609	0.748884	1.52987e-22	0.0426729	-0.00076493	0.000377386	0.813387
NUP85	0	0	0	0	0.480656	0.0530042	0.762131	1.45044e-22	0.0428185	0.00120752	0.000596159	0.813387
ZMAT3	0	0	0	0	0.481078	0.0520898	0.75888	1.49714e-22	0.0428549	-0.00239227	0.00118129	0.813387
RBP1	0	0	0	0	0.482025	0.054386	0.754243	1.39214e-22	0.0428629	0.0014353	0.000708769	0.813387
KCNJ10	0	0	0	0	0.483322	0.0534025	0.750898	1.32537e-22	0.0429272	0.00144174	0.000712169	0.813387
CLIP4	0	0	0	0	0.475441	0.0525307	0.759169	1.61122e-22	0.0431226	0.00102277	0.000505686	0.813387
ANKRD53	0	0	0	0	0.482689	0.0522203	0.756507	1.67811e-22	0.043162	-0.00207117	0.00102424	0.813387
WDR35	0	0	0	0	0.485429	0.0532803	0.765328	1.74341e-22	0.043166	-0.000649883	0.000321387	0.813387
TMEM222	0	0	0	0	0.483229	0.0535263	0.754423	1.8125e-22	0.0432052	0.00184533	0.000912743	0.813387
NFATC3	0	0	0	0	0.479297	0.0519662	0.758655	1.60574e-22	0.0432594	0.00119043	0.000588965	0.813387
ZNF727	0	0	0	0	0.47845	0.0519821	0.758862	1.48667e-22	0.0433034	0.000962697	0.000476396	0.813387
USP47	0	0	0	0	0.479204	0.0533041	0.754611	1.2718e-22	0.0433207	-0.0011348	0.000561607	0.813387
PLCH2	0	0	0	0	0.47927	0.0525081	0.757002	1.62255e-22	0.0433295	-0.000906729	0.000448756	0.813387
FBXL22	0	0	0	0	0.47552	0.0521967	0.759165	1.74375e-22	0.0434049	0.00119135	0.00058983	0.813387
CDH16	0	0	0	0	0.48004	0.0528703	0.746722	1.44815e-22	0.0434108	-0.00102355	0.000506768	0.813387
INTS8	0	0	0	0	0.482419	0.0529792	0.758437	1.65059e-22	0.0434208	-0.0011372	0.000563067	0.813387
FAM174B	0	0	0	0	0.475968	0.0535316	0.751297	1.32376e-22	0.043434	-0.00228542	0.00113166	0.813387
DGCR14	0	0	0	0	0.476586	0.0524662	0.753271	1.40256e-22	0.0434547	-0.00132515	0.00065623	0.813387
NCAPG2	0	0	0	0	0.484242	0.0530546	0.756421	1.64984e-22	0.0435088	-0.000568948	0.000281823	0.813387
AK3	0	0	0	0	0.481679	0.0526702	0.754838	1.45655e-22	0.043518	-0.00141732	0.000702085	0.813387
MITF	0	0	0	0	0.476627	0.0524311	0.763821	1.55312e-22	0.0435405	-0.000926984	0.000459242	0.813387
TRPV1	0	0	0	0	0.481333	0.0518731	0.761341	1.80531e-22	0.043543	0.000849016	0.000420621	0.813387
VASH2	0	0	0	0	0.48009	0.0522649	0.757023	1.53814e-22	0.0436238	-0.00187892	0.000931216	0.813387
KCNJ3	0	0	0	0	0.47817	0.0521046	0.763847	1.29267e-22	0.0436522	-0.00447203	0.00221669	0.813387
OAZ1	0	0	0	0	0.474901	0.0535854	0.756872	1.39825e-22	0.043653	0.0012	0.000594818	0.813387
ZBTB21	0	0	0	0	0.482568	0.0526476	0.750997	1.59387e-22	0.0437023	0.00142556	0.000706787	0.813387
CHRNA5	0	0	0	0	0.479369	0.0520695	0.752458	1.45278e-22	0.0437094	0.00158505	0.000785892	0.813387
DCDC1	0	0	0	0	0.476859	0.0530684	0.765412	1.52787e-22	0.0437783	0.000632426	0.000313668	0.813387
GGNBP2	0	0	0	0	0.48519	0.0531043	0.758091	1.5016e-22	0.0438264	0.00219393	0.00108839	0.813387
SETDB1	0	0	0	0	0.471472	0.0535229	0.76179	1.39077e-22	0.0439341	0.00102186	0.000507192	0.813387
TMPRSS11A	0	0	0	0	0.479441	0.0531313	0.758436	1.70923e-22	0.0440189	0.00127003	0.000630625	0.813387
CDK8	0	0	0	0	0.481078	0.0515552	0.753023	1.63304e-22	0.0440248	-0.00332946	0.00165326	0.813387
ACOT7	0	0	0	0	0.475718	0.0531211	0.749987	1.66944e-22	0.0440405	0.00203889	0.0010125	0.813387
NALCN	0	0	0	0	0.475302	0.0529062	0.75499	1.46643e-22	0.0440473	-0.000860396	0.000427279	0.813387
CLN6	0	0	0	0	0.47779	0.0534535	0.75518	1.30361e-22	0.0441936	-0.00145622	0.000723672	0.813387
WEE1	0	0	0	0	0.474551	0.0523151	0.758173	1.78939e-22	0.0442111	0.00110017	0.000546776	0.813387
ADAR	0	0	0	0	0.477895	0.0539601	0.753511	1.3476e-22	0.0442318	-0.00112091	0.000557137	0.813387
GAL3ST1	0	0	0	0	0.477068	0.0515125	0.758686	1.50862e-22	0.0443011	-0.00148332	0.00073751	0.813387
RPA1	0	0	0	0	0.478794	0.0537854	0.757946	1.85677e-22	0.0443204	0.00117586	0.000584692	0.813387
KIF3C	0	0	0	0	0.479858	0.0529325	0.753673	1.3324e-22	0.0443684	0.00160895	0.000800229	0.813387
KCTD6	0	0	0	0	0.478719	0.0524578	0.754444	1.46734e-22	0.044507	0.00366517	0.0018241	0.813387
SLCO1B7	0	0	0	0	0.480799	0.0537235	0.754221	1.50687e-22	0.0445156	0.000823388	0.000409805	0.813387
HSPA6	0	0	0	0	0.482505	0.053586	0.758446	1.4274e-22	0.0445385	0.00106699	0.000531103	0.813387
TM2D2	0	0	0	0	0.47811	0.0526103	0.756363	1.50725e-22	0.044583	0.00195279	0.000972222	0.813387
KIF3A	0	0	0	0	0.480377	0.0530029	0.760292	1.39957e-22	0.044619	-0.00217804	0.00108455	0.813387
DIRAS3	0	0	0	0	0.480144	0.0530431	0.760449	1.65677e-22	0.0446485	-0.0040999	0.00204181	0.813387
NFE2L1	0	0	0	0	0.478679	0.0525653	0.758221	1.59759e-22	0.0446557	-0.00130649	0.000650674	0.813387
FICD	0	0	0	0	0.473403	0.0522104	0.758327	1.16083e-22	0.044679	0.00123608	0.000615675	0.813387
STK19	0	0	0	0	0.478217	0.0527307	0.755842	1.54941e-22	0.0446801	0.0015651	0.000779562	0.813387
EXOSC1	0	0	0	0	0.483761	0.0545604	0.756204	1.66686e-22	0.0446992	0.00130375	0.000649442	0.813387
RBAK	0	0	0	0	0.476891	0.0535616	0.752741	1.5331e-22	0.0447475	-0.00152108	0.000757872	0.813387
CA13	0	0	0	0	0.48052	0.0525415	0.759281	1.54779e-22	0.0448079	-0.00177797	0.000886119	0.813387
HM13	0	0	0	0	0.47984	0.0525719	0.75532	1.35224e-22	0.0448297	0.00224015	0.00111657	0.813387
HACD4	0	0	0	0	0.470167	0.0519062	0.75389	1.27821e-22	0.0449392	-0.00105484	0.000526043	0.813387
EML3	0	0	0	0	0.47342	0.0527869	0.762799	1.50849e-22	0.0449542	-0.000944953	0.000471275	0.813387
MKRN2OS	0	0	0	0	0.479607	0.0533126	0.756209	1.56767e-22	0.044974	0.00215872	0.00107671	0.813387
NOXRED1	0	0	0	0	0.481125	0.053402	0.754136	1.57817e-22	0.0449765	0.0021042	0.00104953	0.813387
DGKE	0	0	0	0	0.479714	0.0533747	0.753592	1.4398e-22	0.0451024	0.000813106	0.000405799	0.813387
COPS2	0	0	0	0	0.474575	0.0525479	0.757587	1.45655e-22	0.0451075	-0.00458134	0.00228648	0.813387
PPIP5K1	0	0	0	0	0.48707	0.0553619	0.758877	1.51168e-22	0.0451173	-0.00204241	0.00101938	0.813387
CTGF	0	0	0	0	0.47737	0.0522205	0.760264	1.90495e-22	0.0451211	-0.00151111	0.000754217	0.813387
MRPL41	0	0	0	0	0.483351	0.0527721	0.749141	1.29648e-22	0.0451305	0.00166063	0.000828885	0.813387
ATAD3A	0	0	0	0	0.481179	0.0530086	0.754184	1.65197e-22	0.0452444	-0.000775875	0.000387474	0.813387
HMGXB3	0	0	0	0	0.475341	0.0533828	0.754084	1.47509e-22	0.0452574	0.000638726	0.000319	0.813387
C16orf45	0	0	0	0	0.478273	0.0531353	0.762371	1.63143e-22	0.0453414	-0.00131135	0.000655187	0.813387
COX7B	0	0	0	0	0.476738	0.0522221	0.755793	1.28949e-22	0.0453541	-0.00971928	0.0048563	0.813387
WASHC2A	0	0	0	0	0.476707	0.0524579	0.762169	1.88591e-22	0.0453847	-0.000836299	0.000417922	0.813387
EFCAB7	0	0	0	0	0.475502	0.052816	0.7555	1.80938e-22	0.0453882	-0.000801545	0.000400561	0.813387
FZD3	0	0	0	0	0.472002	0.0519834	0.753123	1.46227e-22	0.045445	0.00158607	0.000792824	0.813387
LYPD3	0	0	0	0	0.476686	0.0528736	0.760625	1.68755e-22	0.0455262	0.00136245	0.000681301	0.813387
CRBN	0	0	0	0	0.48351	0.0536595	0.75467	1.29389e-22	0.0455692	-0.00131694	0.000658674	0.813387
TRIM13	0	0	0	0	0.479688	0.0524093	0.752998	1.4584e-22	0.0455821	0.00237975	0.00119031	0.813387
PRAMEF4	0	0	0	0	0.47915	0.0527865	0.755768	1.38667e-22	0.0456647	0.00160484	0.000803022	0.813387
GJC2	0	0	0	0	0.480464	0.0532807	0.75117	1.71135e-22	0.0456666	0.00206896	0.00103527	0.813387
CIB1	0	0	0	0	0.481346	0.0528122	0.759803	1.38165e-22	0.04569	-0.0019344	0.000968041	0.813387
FRAT2	0	0	0	0	0.476397	0.0532859	0.753599	1.77803e-22	0.0457191	-0.00150584	0.000753674	0.813387
FNDC5	0	0	0	0	0.479611	0.0518266	0.763774	1.60871e-22	0.0458143	0.0018546	0.000928639	0.813546
FRG2C	0	0	0	0	0.47873	0.0552443	0.752319	1.38371e-22	0.0458156	-0.000838388	0.000419801	0.813546
SREBF2	0	0	0	0	0.47759	0.0529324	0.762251	1.50762e-22	0.0459064	-0.000802579	0.000402039	0.81379
TRA2B	0	0	0	0	0.483266	0.0534454	0.753795	1.58811e-22	0.0459225	0.00498151	0.00249559	0.81379
NUDT15	0	0	0	0	0.481696	0.053398	0.756303	1.96118e-22	0.045982	-0.00281241	0.00140932	0.81379
ELF5	0	0	0	0	0.48184	0.0527707	0.750655	1.47964e-22	0.0460148	0.00216696	0.00108604	0.81379
PLSCR2	0	0	0	0	0.482179	0.0531622	0.761918	1.47606e-22	0.0461589	0.00153481	0.000769729	0.81379
RBCK1	0	0	0	0	0.482076	0.0526619	0.751414	1.3239e-22	0.0461687	-0.00141794	0.000711151	0.81379
FXR1	0	0	0	0	0.478051	0.0526129	0.754682	1.57639e-22	0.046172	0.00196221	0.000984138	0.81379
PARP14	0	0	0	0	0.478257	0.0533195	0.749228	1.17052e-22	0.046199	-0.00101132	0.000507284	0.81379
RALGPS2	0	0	0	0	0.48231	0.0533553	0.756588	1.25161e-22	0.0463141	0.0011425	0.000573388	0.81379
C17orf105	0	0	0	0	0.474508	0.0527173	0.755004	1.61115e-22	0.0463358	0.00237181	0.00119046	0.81379
HIST1H2AE	0	0	0	0	0.481507	0.0537605	0.755086	1.56775e-22	0.0465243	0.00450994	0.00226559	0.81379
SUPT3H	0	0	0	0	0.475671	0.0524988	0.754958	1.69888e-22	0.0465797	-0.00164673	0.000827454	0.81379
KARS	0	0	0	0	0.482122	0.0533284	0.75971	1.29661e-22	0.0466016	0.000617766	0.000310447	0.81379
C7orf25	0	0	0	0	0.478143	0.0526185	0.761326	1.56024e-22	0.046662	-0.00140866	0.000708095	0.81379
VAPB	0	0	0	0	0.472382	0.0528272	0.762706	1.93417e-22	0.0466692	0.00183363	0.000921742	0.81379
PRR15	0	0	0	0	0.480538	0.053445	0.756989	1.44633e-22	0.0466921	-0.00281842	0.00141693	0.81379
CAGE1	0	0	0	0	0.483188	0.0535707	0.758286	1.5224e-22	0.0467099	-0.00112102	0.000563629	0.81379
OR8J3	0	0	0	0	0.48101	0.0535713	0.750722	1.58006e-22	0.0467444	-0.00276879	0.00139231	0.81379
KCNH1	0	0	0	0	0.47571	0.052667	0.759774	1.59684e-22	0.046763	0.0015746	0.00079187	0.81379
ZNF561	0	0	0	0	0.482866	0.0524982	0.75885	1.78128e-22	0.0467985	0.00132352	0.000665709	0.81379
GRIN1	0	0	0	0	0.483789	0.0537042	0.763248	1.67402e-22	0.0468119	-0.00254878	0.00128207	0.81379
SLC45A2	0	0	0	0	0.477295	0.0528262	0.748551	1.76303e-22	0.0469061	0.000952916	0.000479536	0.81379
ZBTB7A	0	0	0	0	0.478675	0.0523006	0.753526	1.59429e-22	0.0469508	0.00157144	0.000790956	0.81379
WDR18	0	0	0	0	0.479532	0.0524551	0.753804	1.66222e-22	0.0470051	0.00171728	0.000864573	0.81379
PSRC1	0	0	0	0	0.482674	0.0524293	0.747309	1.44034e-22	0.0470665	-0.000958669	0.000482782	0.81379
CCDC83	0	0	0	0	0.480548	0.0530959	0.760625	1.60924e-22	0.0471114	-0.00190793	0.000961023	0.81379
RGS20	0	0	0	0	0.485926	0.0528491	0.753538	1.60945e-22	0.0471486	0.00185037	0.000932187	0.81379
ZNF563	0	0	0	0	0.478539	0.0538936	0.760288	1.42457e-22	0.0471683	-0.00185202	0.000933097	0.81379
MPP1	0	0	0	0	0.476081	0.0532274	0.761606	1.57262e-22	0.0471734	0.00254982	0.0012847	0.81379
GPX1	0	0	0	0	0.479049	0.0526169	0.754794	1.63016e-22	0.0472821	0.00244917	0.0012346	0.81379
ATXN3L	0	0	0	0	0.479848	0.0528241	0.7657	1.79656e-22	0.0472992	-0.00177322	0.000893927	0.81379
PRPF39	0	0	0	0	0.480611	0.0533502	0.756394	1.5601e-22	0.0473098	0.00185265	0.000934017	0.81379
COL6A2	0	0	0	0	0.482785	0.0528952	0.758461	1.54053e-22	0.0474169	-0.00048097	0.000242598	0.81379
TSPYL6	0	0	0	0	0.471105	0.051303	0.758953	1.48176e-22	0.0474363	0.00263084	0.0013271	0.81379
ZNF555	0	0	0	0	0.483178	0.0531884	0.759813	1.30754e-22	0.0474405	0.00159703	0.00080562	0.81379
NRCAM	0	0	0	0	0.478558	0.052046	0.759332	2.10278e-22	0.0474584	-0.000609187	0.000307328	0.81379
TIMELESS	0	0	0	0	0.482303	0.054262	0.745917	1.44287e-22	0.0475182	0.00049269	0.000248624	0.81379
CLEC18A	0	0	0	0	0.483001	0.0526929	0.759455	1.54801e-22	0.0476532	-0.00262739	0.00132665	0.81379
PPIG	0	0	0	0	0.474487	0.0536601	0.757909	1.85063e-22	0.0477622	-0.00233072	0.00117743	0.81379
LRRC8D	0	0	0	0	0.484066	0.0539095	0.758009	1.50226e-22	0.0478148	0.00254021	0.00128356	0.81379
FGD1	0	0	0	0	0.485771	0.0523737	0.75537	1.51187e-22	0.0478482	0.00184271	0.000931257	0.81379
EEF1B2	0	0	0	0	0.479552	0.0543998	0.755208	1.23216e-22	0.0479722	0.00152502	0.000771135	0.81379
PTPN11	0	0	0	0	0.475464	0.0526424	0.755586	1.73825e-22	0.0479841	-0.00141554	0.000715814	0.81379
LRRC45	0	0	0	0	0.479265	0.0527578	0.753331	1.78878e-22	0.0480317	0.00101207	0.000511893	0.81379
RING1	0	0	0	0	0.477723	0.0534773	0.751813	1.77867e-22	0.0480324	0.00251053	0.0012698	0.81379
CPM	0	0	0	0	0.481974	0.0526291	0.754108	1.64452e-22	0.0481217	-0.00200802	0.00101605	0.81379
MPP6	0	0	0	0	0.482745	0.0525713	0.758439	1.54706e-22	0.0481719	-0.00168876	0.000854691	0.81379
MIOS	0	0	0	0	0.47868	0.0516653	0.757498	1.36578e-22	0.048189	-0.001636	0.000828054	0.81379
OXLD1	0	0	0	0	0.477259	0.0533479	0.752337	1.59862e-22	0.0482275	-0.00281816	0.00142664	0.81379
SYP	0	0	0	0	0.479602	0.0527013	0.763508	1.56261e-22	0.0482309	0.00363253	0.00183893	0.81379
SMAD5	0	0	0	0	0.480661	0.0524704	0.755967	1.5654e-22	0.048245	0.00283437	0.00143496	0.81379
PROC	0	0	0	0	0.473983	0.0527464	0.758769	1.72411e-22	0.0482469	0.00186331	0.00094335	0.81379
FBXL8	0	0	0	0	0.47268	0.0540823	0.757762	1.718e-22	0.0482867	-0.001131	0.000572701	0.81379
TP53INP2	0	0	0	0	0.475612	0.052068	0.758433	1.66655e-22	0.0483133	0.00222778	0.00112821	0.81379
OR52B4	0	0	0	0	0.481764	0.0533497	0.757722	1.26027e-22	0.0483941	-0.00168926	0.000855796	0.81379
WEE2	0	0	0	0	0.486166	0.0531583	0.759963	1.5189e-22	0.0485048	-0.00148486	0.000752615	0.81379
CHAMP1	0	0	0	0	0.480608	0.0527543	0.761637	1.54006e-22	0.0485302	0.00131469	0.000666437	0.81379
WDR41	0	0	0	0	0.47918	0.053432	0.75848	1.51107e-22	0.0485335	-0.000465044	0.000235742	0.81379
ARHGEF15	0	0	0	0	0.487273	0.0522817	0.757921	1.97892e-22	0.0485729	0.000806157	0.000408732	0.81379
SYNJ1	0	0	0	0	0.47779	0.0524077	0.755042	1.96293e-22	0.0485735	-0.00079225	0.000401681	0.81379
CELF3	0	0	0	0	0.484077	0.0533241	0.75849	1.28197e-22	0.0486978	-0.00234548	0.00118985	0.81379
CAMK4	0	0	0	0	0.4816	0.0525034	0.751737	1.50732e-22	0.0487081	0.00174399	0.000884755	0.81379
ZUFSP	0	0	0	0	0.477357	0.053768	0.761519	1.44061e-22	0.0487883	0.00138096	0.000700833	0.81379
C16orf58	0	0	0	0	0.482227	0.0535806	0.757614	1.36244e-22	0.0488376	0.00143746	0.000729666	0.81379
SCX	0	0	0	0	0.482465	0.0537032	0.758941	1.47186e-22	0.0488801	-0.00248181	0.00126003	0.81379
LPCAT3	0	0	0	0	0.482049	0.0534321	0.756279	1.43351e-22	0.0489036	0.00189367	0.000961521	0.81379
GALNT4	0	0	0	0	0.478068	0.052917	0.762607	1.46593e-22	0.048917	-0.00253347	0.00128646	0.81379
TMEM179	0	0	0	0	0.477678	0.0519869	0.759913	1.43362e-22	0.0489192	-0.00241604	0.00122684	0.81379
PLA2G4C	0	0	0	0	0.479031	0.0523953	0.759381	1.55e-22	0.0489803	-0.00109479	0.000556074	0.81379
ATXN1	0	0	0	0	0.485008	0.0520153	0.761793	1.4256e-22	0.0489826	0.00104173	0.000529128	0.81379
DYNLRB2	0	0	0	0	0.481173	0.0525532	0.754055	1.5088e-22	0.0490485	-0.0024473	0.00124343	0.81379
EHBP1	0	0	0	0	0.477046	0.0535615	0.748232	1.43307e-22	0.0490917	-0.000641673	0.000326084	0.81379
BEND7	0	0	0	0	0.478157	0.0534122	0.752433	1.33821e-22	0.049147	0.0019511	0.000991749	0.81379
CXorf38	0	0	0	0	0.478962	0.0525181	0.756218	1.45385e-22	0.0491618	-0.00267628	0.00136045	0.81379
AARD	0	0	0	0	0.47792	0.0524789	0.750373	1.60862e-22	0.0491844	0.00285076	0.00144929	0.81379
FKBP1B	0	0	0	0	0.478746	0.0531173	0.752145	1.40744e-22	0.0492872	-0.00745318	0.00379081	0.81379
ARNT	0	0	0	0	0.479649	0.0522986	0.757131	1.52201e-22	0.049326	-0.00108517	0.00055203	0.81379
KBTBD3	0	0	0	0	0.470936	0.0530203	0.759183	1.38399e-22	0.0493279	-0.00138443	0.00070427	0.81379
FBXL13	0	0	0	0	0.478129	0.0532189	0.758409	1.67481e-22	0.0493547	0.00113681	0.000578371	0.81379
PIK3CG	0	0	0	0	0.487984	0.0536841	0.752466	1.57384e-22	0.0493656	-0.00109178	0.000555492	0.81379
SEMA6A	0	0	0	0	0.479091	0.0527547	0.75774	1.32824e-22	0.0493817	0.000797512	0.000405797	0.81379
CARTPT	0	0	0	0	0.478841	0.0531955	0.754957	1.34858e-22	0.049544	-0.00144527	0.000735919	0.81574
NBEA	0	0	0	0	0.471324	0.0531938	0.763871	1.50554e-22	0.049608	0.000648767	0.000330439	0.816068
ANKDD1B	0	0	0	0	0.476656	0.0522385	0.757289	1.51578e-22	0.0497711	0.00142352	0.000725564	0.817937
TMEM220	0	0	0	0	0.478865	0.052468	0.750065	1.40476e-22	0.0498319	0.00184021	0.000938201	0.817937
PRDX6	0	0	0	0	0.48136	0.0526775	0.753204	1.3778e-22	0.0498886	-0.0016521	0.000842507	0.817937
MYCBP2	0	0	0	0	0.478705	0.0527128	0.754607	1.38971e-22	0.0499455	-0.000593057	0.000302511	0.817937
ACSF2	0	0	0	0	0.473413	0.0535698	0.751772	1.52384e-22	0.0499833	0.000940123	0.000479624	0.817937
MBNL3	0	0	0	0	0.484627	0.0523948	0.754741	1.60134e-22	0.049986	0.00327814	0.00167244	0.817937
MYBL2	0	0	0	0	0.479766	0.0532291	0.749193	1.43189e-22	0.0501701	-0.00166713	0.000851217	0.820221
RTBDN	0	0	0	0	0.486695	0.0535232	0.759882	1.39084e-22	0.0502623	-0.00123685	0.000631774	0.820221
PMS2	0	0	0	0	0.474609	0.0539546	0.757378	1.53061e-22	0.0503069	0.000937437	0.000478929	0.820221
N6AMT1	0	0	0	0	0.48061	0.0524041	0.755312	1.35764e-22	0.050331	-0.00156227	0.000798236	0.820221
TIGAR	0	0	0	0	0.480616	0.0529917	0.759573	1.62028e-22	0.0503466	0.00433797	0.00221662	0.820221
KRT10	0	0	0	0	0.479252	0.0521349	0.762512	1.72604e-22	0.0503973	0.00101694	0.00051975	0.820326
CDK11B	0	0	0	0	0.484184	0.052239	0.752668	1.41852e-22	0.0505798	-0.00219169	0.00112104	0.820518
SMAGP	0	0	0	0	0.478616	0.0523073	0.760067	1.438e-22	0.0505883	0.00317662	0.00162489	0.820518
IL1RL2	0	0	0	0	0.474163	0.0531222	0.763354	1.56949e-22	0.050633	0.00143406	0.000733688	0.820518
KRT4	0	0	0	0	0.472049	0.0522219	0.759659	1.76132e-22	0.0507174	0.000754883	0.00038635	0.820518
LRIT2	0	0	0	0	0.480257	0.0526773	0.755317	1.63904e-22	0.0507321	-0.001338	0.000684834	0.820518
ISLR2	0	0	0	0	0.475421	0.0523694	0.751666	1.356e-22	0.050773	-0.00154954	0.000793248	0.820518
TRAF3IP3	0	0	0	0	0.47971	0.053112	0.746535	1.55686e-22	0.050775	-0.00113874	0.000582956	0.820518
ZAP70	0	0	0	0	0.483149	0.0532602	0.758849	1.5638e-22	0.0508065	-0.00145861	0.000746806	0.820518
NCKIPSD	0	0	0	0	0.478435	0.05247	0.760467	1.70019e-22	0.0508862	0.000925207	0.000473868	0.820518
PYGL	0	0	0	0	0.479785	0.0536046	0.749651	1.29221e-22	0.0508924	-0.000420231	0.000215238	0.820518
DOPEY2	0	0	0	0	0.475005	0.0539897	0.761103	1.48247e-22	0.050986	0.000421046	0.000215743	0.820518
DPPA5	0	0	0	0	0.477065	0.0531459	0.754257	1.49185e-22	0.051008	-0.00496454	0.00254405	0.820518
PIGU	0	0	0	0	0.468064	0.053052	0.761918	1.7545e-22	0.0510343	0.000998985	0.000511983	0.820518
SEC24A	0	0	0	0	0.47841	0.0536479	0.756133	1.51073e-22	0.0510532	-0.000962438	0.000493292	0.820518
PCDH10	0	0	0	0	0.477181	0.052198	0.756954	1.27426e-22	0.0510737	-0.00157436	0.000807	0.820518
ACOT6	0	0	0	0	0.480267	0.0532845	0.752355	1.4288e-22	0.0511165	-0.00269792	0.00138318	0.820518
TEKT1	0	0	0	0	0.479849	0.053871	0.758222	1.38699e-22	0.0514	0.00111897	0.00057438	0.824355
NUF2	0	0	0	0	0.479122	0.0536066	0.761128	1.50897e-22	0.0514499	0.0011414	0.000586018	0.824372
SHANK1	0	0	0	0	0.481202	0.0545107	0.758156	1.69812e-22	0.0515249	-0.000866281	0.000444909	0.824372
HPSE2	0	0	0	0	0.479023	0.0535263	0.762153	1.4793e-22	0.0515446	0.000557924	0.000286565	0.824372
C1orf216	0	0	0	0	0.480475	0.0519369	0.755459	1.30279e-22	0.0516983	-0.00103988	0.000534461	0.824372
KLHL30	0	0	0	0	0.478427	0.0523627	0.756464	1.26358e-22	0.0517541	-0.000787552	0.000404872	0.824372
HEBP2	0	0	0	0	0.477531	0.0528655	0.762488	1.47882e-22	0.051764	-0.000795059	0.000408748	0.824372
C1orf194	0	0	0	0	0.486675	0.0535993	0.760404	1.81507e-22	0.0517654	0.00172753	0.000888147	0.824372
EHD3	0	0	0	0	0.483509	0.0529249	0.752022	1.24416e-22	0.0518359	-0.00160522	0.000825516	0.824372
ZDHHC20	0	0	0	0	0.477703	0.0533805	0.762992	1.42089e-22	0.0518593	0.000730719	0.000375823	0.824372
CCDC22	0	0	0	0	0.480988	0.0534557	0.758943	1.53381e-22	0.0519864	-0.000576011	0.000296414	0.824372
FOLR1	0	0	0	0	0.476678	0.0526765	0.757083	1.21055e-22	0.0520033	-0.00139635	0.000718609	0.824372
KCNK12	0	0	0	0	0.478893	0.0534022	0.758294	1.34887e-22	0.0520828	-0.00287803	0.00148164	0.824372
IGFLR1	0	0	0	0	0.47734	0.0531007	0.752654	1.51972e-22	0.052097	-0.00100056	0.000515131	0.824372
CYB561D2	0	0	0	0	0.481891	0.052046	0.754299	1.45943e-22	0.052098	-0.000467637	0.000240759	0.824372
CX3CR1	0	0	0	0	0.482422	0.0537064	0.753676	1.51464e-22	0.0521033	-0.00164839	0.000848682	0.824372
DPYSL5	0	0	0	0	0.483484	0.0527913	0.747455	1.6376e-22	0.0521119	0.0012439	0.000640449	0.824372
BANP	0	0	0	0	0.482964	0.0528973	0.759511	1.46399e-22	0.0522077	-0.00185196	0.000953911	0.824524
RTEL1	0	0	0	0	0.478767	0.0532893	0.755095	1.43091e-22	0.0522103	-0.000999011	0.00051458	0.824524
NOP2	0	0	0	0	0.476674	0.0532291	0.758697	1.35235e-22	0.05228	0.000683335	0.000352082	0.824655
USP25	0	0	0	0	0.477778	0.0530966	0.760219	1.37222e-22	0.0524584	-0.000758046	0.000390873	0.824655
FANCL	0	0	0	0	0.479677	0.0528141	0.755257	1.7982e-22	0.0524979	0.000914794	0.000471776	0.824655
SENP8	0	0	0	0	0.479961	0.0523404	0.754751	1.45334e-22	0.0525288	0.00474306	0.0024464	0.824655
RPL41	0	0	0	0	0.484515	0.0530419	0.746963	1.366e-22	0.0525536	0.0151236	0.00780135	0.824655
ACTN3	0	0	0	0	0.483076	0.0521673	0.750399	1.43033e-22	0.0525582	-0.000480407	0.000247818	0.824655
CDX2	0	0	0	0	0.477495	0.0534692	0.758752	1.52517e-22	0.0525868	-0.0016538	0.000853215	0.824655
NBPF26	0	0	0	0	0.479263	0.0528715	0.755021	1.67199e-22	0.052685	0.00131167	0.000676986	0.824655
E2F2	0	0	0	0	0.479365	0.0548224	0.755401	1.46973e-22	0.0527058	-0.00116799	0.000602882	0.824655
GPS2	0	0	0	0	0.478174	0.0528014	0.761042	1.79064e-22	0.0527409	-0.00272885	0.00140877	0.824655
TLE3	0	0	0	0	0.470646	0.0530525	0.756133	1.56235e-22	0.0527518	0.00085678	0.000442331	0.824655
MORF4L1	0	0	0	0	0.481428	0.0520465	0.754779	1.64039e-22	0.0528125	-0.00267662	0.00138222	0.824655
GTF2E1	0	0	0	0	0.483621	0.0538736	0.758249	1.52953e-22	0.0528714	-0.00103144	0.000532775	0.824655
SMIM3	0	0	0	0	0.47283	0.0535224	0.750207	1.52232e-22	0.052874	-0.000608892	0.000314516	0.824655
NCR3	0	0	0	0	0.478819	0.0529977	0.760038	1.50636e-22	0.0528853	0.0010011	0.000517131	0.824655
YEATS4	0	0	0	0	0.472625	0.052715	0.755976	1.5651e-22	0.052953	-0.00555765	0.00287169	0.824784
SYNE2	0	0	0	0	0.471519	0.0531115	0.759989	1.73259e-22	0.0529989	0.000264965	0.000136937	0.824784
SSTR4	0	0	0	0	0.481546	0.0527894	0.757741	1.60365e-22	0.0530694	-0.000910502	0.000470696	0.824784
HIGD1A	0	0	0	0	0.477245	0.052256	0.753461	1.47604e-22	0.0531655	-0.00363301	0.00187889	0.824784
ZNF503	0	0	0	0	0.483484	0.0532797	0.753126	1.74503e-22	0.0531834	-0.00102719	0.000531274	0.824784
ARCN1	0	0	0	0	0.47312	0.0521412	0.759408	1.52621e-22	0.0531909	0.00162004	0.000837928	0.824784
CPNE2	0	0	0	0	0.48432	0.053634	0.758814	1.45876e-22	0.0532047	-0.00125353	0.0006484	0.824784
SIRT4	0	0	0	0	0.476253	0.0533723	0.759643	1.53015e-22	0.0533674	0.000601532	0.00031136	0.826322
CYP17A1	0	0	0	0	0.482164	0.052479	0.754205	1.55973e-22	0.0534502	0.00176794	0.000915422	0.826322
DHRS7C	0	0	0	0	0.478702	0.0526493	0.753575	1.45034e-22	0.0534533	0.00166871	0.000864054	0.826322
CHRM2	0	0	0	0	0.476044	0.0527125	0.763523	2.42198e-22	0.053482	-0.0020953	0.00108507	0.826322
CD151	0	0	0	0	0.479364	0.0545865	0.751196	1.67252e-22	0.0536128	0.00196801	0.00101971	0.827233
WDR82	0	0	0	0	0.484972	0.0530906	0.753008	1.4215e-22	0.0536302	-0.00479078	0.00248249	0.827233
MTNR1A	0	0	0	0	0.471712	0.0521793	0.756036	1.71669e-22	0.0537954	-0.00107609	0.000557996	0.827835
IFNE	0	0	0	0	0.480423	0.0523364	0.76014	1.31461e-22	0.053802	-0.00324527	0.00168285	0.827835
CASP10	0	0	0	0	0.477978	0.0545961	0.757911	1.38208e-22	0.053803	-0.00168036	0.000871357	0.827835
KCTD13	0	0	0	0	0.481251	0.0524176	0.757357	1.51343e-22	0.0539241	-0.00191972	0.000995981	0.82901
PLCL1	0	0	0	0	0.481238	0.0528442	0.755571	1.40085e-22	0.0539942	-0.000996811	0.000517313	0.829086
PTGES3	0	0	0	0	0.471858	0.0539833	0.755061	1.43244e-22	0.0540305	0.00420563	0.00218292	0.829086
BRPF1	0	0	0	0	0.477052	0.0528621	0.757288	1.39081e-22	0.0540708	-0.00125731	0.000652714	0.829086
SCG5	0	0	0	0	0.479246	0.053569	0.753067	1.33285e-22	0.0541493	-0.00199666	0.00103687	0.829086
VSX2	0	0	0	0	0.476364	0.0522541	0.745538	1.37512e-22	0.0541527	0.00101409	0.000526625	0.829086
FBXL17	0	0	0	0	0.473651	0.0530665	0.750675	1.48286e-22	0.0542011	-0.00150838	0.000783474	0.829086
GADD45G	0	0	0	0	0.479524	0.0541749	0.757833	1.37558e-22	0.0542418	0.0100578	0.00522504	0.829086
KIF3B	0	0	0	0	0.481406	0.0531269	0.756718	1.58329e-22	0.054432	0.00174017	0.000904737	0.830259
NHS	0	0	0	0	0.477012	0.053445	0.757168	1.5421e-22	0.0544426	-0.00110175	0.000572838	0.830259
FUT11	0	0	0	0	0.479495	0.0534618	0.759402	1.47039e-22	0.0544527	0.000840208	0.000436872	0.830259
VAC14	0	0	0	0	0.483654	0.0539357	0.758305	1.49272e-22	0.0545219	-0.000859456	0.000447009	0.830631
SMG7	0	0	0	0	0.478031	0.0527791	0.754551	1.47761e-22	0.0546206	-0.00059973	0.000312051	0.830929
LRIG1	0	0	0	0	0.479572	0.0523701	0.752397	1.53323e-22	0.054631	-0.000619111	0.000322149	0.830929
ADCY9	0	0	0	0	0.481147	0.0520341	0.753899	1.5552e-22	0.0546892	-0.000858715	0.000446932	0.831051
NTHL1	0	0	0	0	0.484512	0.0524562	0.753861	1.48215e-22	0.0547615	0.000679793	0.000353915	0.831051
ANKRD42	0	0	0	0	0.471627	0.0525467	0.76011	1.28251e-22	0.0548096	-0.000838786	0.000436777	0.831051
SCN7A	0	0	0	0	0.473699	0.0540965	0.756828	1.43161e-22	0.0548471	0.000548901	0.000285871	0.831051
ABCB5	0	0	0	0	0.474694	0.0525311	0.75428	1.37956e-22	0.0548757	0.000501708	0.000261323	0.831051
LY6H	0	0	0	0	0.480411	0.0533943	0.750831	1.36533e-22	0.0549077	-0.00199997	0.00104186	0.831051
CD300LF	0	0	0	0	0.480929	0.0529524	0.754424	1.60032e-22	0.0549686	0.00214952	0.00112004	0.831293
DDB2	0	0	0	0	0.480575	0.0534537	0.755737	1.47229e-22	0.0550578	0.00140881	0.000734351	0.831957
PCDHGB3	0	0	0	0	0.48315	0.0533188	0.75725	1.50263e-22	0.0551242	-0.000856622	0.000446643	0.831957
SH3YL1	0	0	0	0	0.480544	0.0529681	0.755624	1.49833e-22	0.055147	0.001835	0.00095686	0.831957
ZNF436	0	0	0	0	0.480416	0.0525431	0.75682	1.53474e-22	0.0552669	-0.00241525	0.00126005	0.832621
STMN1	0	0	0	0	0.482701	0.0524602	0.755752	1.48417e-22	0.055392	0.00667384	0.00348357	0.832621
RRAS	0	0	0	0	0.481365	0.051862	0.757225	1.75435e-22	0.0554358	0.000910117	0.000475143	0.832621
SPINK8	0	0	0	0	0.485797	0.0532826	0.75533	1.33531e-22	0.0554878	-0.0053161	0.00277595	0.832621
MAP4K5	0	0	0	0	0.480713	0.0526882	0.756261	1.83186e-22	0.0555394	0.000764154	0.000399109	0.832621
POLR2I	0	0	0	0	0.479286	0.0523635	0.756689	1.44798e-22	0.0556286	-0.00461083	0.00240907	0.832621
PAQR8	0	0	0	0	0.478037	0.05322	0.758231	1.39881e-22	0.0556575	0.00168555	0.000880769	0.832621
LPCAT4	0	0	0	0	0.487856	0.053852	0.756087	1.47916e-22	0.0556632	-0.00194691	0.00101737	0.832621
MYL12A	0	0	0	0	0.47946	0.0534771	0.755266	1.56546e-22	0.0556725	-0.00402197	0.00210177	0.832621
ELP3	0	0	0	0	0.48151	0.0524594	0.75933	1.19467e-22	0.0557164	0.0010033	0.000524394	0.832621
RPL18A	0	0	0	0	0.478978	0.0535789	0.757349	1.61778e-22	0.0557251	0.00285646	0.00149303	0.832621
PARP11	0	0	0	0	0.477913	0.0534213	0.753864	1.2614e-22	0.0557692	-0.00132336	0.000691825	0.832621
PHF7	0	0	0	0	0.475261	0.0528063	0.748104	1.36313e-22	0.0557743	0.00206727	0.00108075	0.832621
EFCAB9	0	0	0	0	0.483849	0.0525215	0.750868	1.38377e-22	0.0558873	-0.00225783	0.00118091	0.833256
SYTL4	0	0	0	0	0.483236	0.05343	0.749879	1.37873e-22	0.0559067	0.000896597	0.000468985	0.833256
NUP210	0	0	0	0	0.476474	0.0526368	0.755697	1.51111e-22	0.056054	-0.000485986	0.000254359	0.834472
TRIP4	0	0	0	0	0.481195	0.0529184	0.761242	1.45336e-22	0.0560782	-0.00086932	0.000455035	0.834472
KCNE1	0	0	0	0	0.477362	0.0517279	0.756018	1.55579e-22	0.0562254	-0.00226464	0.00118611	0.835571
RFPL2	0	0	0	0	0.478298	0.0522885	0.752451	1.56122e-22	0.0562737	0.00165821	0.000868659	0.835571
COX8A	0	0	0	0	0.482709	0.0534264	0.757141	1.47725e-22	0.0564017	0.00488135	0.00255845	0.835571
RCBTB2	0	0	0	0	0.479757	0.0527725	0.758207	1.37539e-22	0.056505	0.000886468	0.000464816	0.835571
ZP4	0	0	0	0	0.484111	0.0536807	0.759785	1.19422e-22	0.0565307	0.00118625	0.000622068	0.835571
PTPRCAP	0	0	0	0	0.486035	0.0544091	0.752984	1.74874e-22	0.0565905	-0.000976224	0.000512056	0.835571
CDK11A	0	0	0	0	0.480433	0.0531745	0.761811	1.57931e-22	0.0566159	-0.00110308	0.000578656	0.835571
KEAP1	0	0	0	0	0.478791	0.0517945	0.753534	1.44483e-22	0.0566893	-0.00159854	0.000838813	0.835571
TAPBP	0	0	0	0	0.477596	0.0530776	0.749396	1.36739e-22	0.0569395	0.000846421	0.000444598	0.835571
FAM120C	0	0	0	0	0.485594	0.0531632	0.758971	1.62965e-22	0.0569617	-0.00308137	0.00161869	0.835571
GHSR	0	0	0	0	0.480608	0.053807	0.761618	1.55323e-22	0.0569852	0.00153441	0.000806124	0.835571
CRYM	0	0	0	0	0.47959	0.0531837	0.755792	1.45252e-22	0.0570115	-0.00209238	0.00109938	0.835571
SNAPIN	0	0	0	0	0.478922	0.0527187	0.756546	1.68962e-22	0.0570393	-0.0036535	0.00191984	0.835571
EIF2S3	0	0	0	0	0.482039	0.0529672	0.759867	1.51289e-22	0.0570794	0.00904962	0.00475615	0.835571
UNC5A	0	0	0	0	0.480576	0.0521602	0.756989	1.56905e-22	0.0571103	0.000691683	0.000363569	0.835571
TFB1M	0	0	0	0	0.478855	0.0540677	0.756796	1.39158e-22	0.0571795	0.00139043	0.000731052	0.835571
PNPT1	0	0	0	0	0.478776	0.0536611	0.751008	1.10606e-22	0.0572025	0.000854504	0.000449319	0.835571
SELENOH	0	0	0	0	0.482099	0.0527828	0.752028	1.24063e-22	0.0572286	-0.000809099	0.000425488	0.835571
TBXA2R	0	0	0	0	0.48511	0.0521718	0.75807	1.74473e-22	0.0572738	-0.00165455	0.000870252	0.835571
TMEM170B	0	0	0	0	0.480328	0.0526902	0.754832	1.44294e-22	0.0573101	-0.00396111	0.00208375	0.835571
IL18BP	0	0	0	0	0.47802	0.0528614	0.75798	1.44378e-22	0.057465	0.00277203	0.00145914	0.835571
KRT33B	0	0	0	0	0.476375	0.0531316	0.748254	1.54633e-22	0.0574905	-0.000749972	0.00039481	0.835571
SAP30	0	0	0	0	0.476013	0.0529936	0.752528	1.84748e-22	0.0574974	0.0036858	0.00194038	0.835571
SLC25A47	0	0	0	0	0.489066	0.0542926	0.757928	1.96639e-22	0.0575226	-0.000512522	0.000269843	0.835571
PCOLCE2	0	0	0	0	0.480338	0.0539457	0.754919	1.38262e-22	0.0575499	0.000850195	0.000447677	0.835571
CLTCL1	0	0	0	0	0.482094	0.0526081	0.756761	2.00412e-22	0.0575692	0.000494658	0.000260486	0.835571
COX7A2L	0	0	0	0	0.474288	0.0543575	0.748811	1.6224e-22	0.0575701	0.00273237	0.00143886	0.835571
ZNF548	0	0	0	0	0.475043	0.0520698	0.751873	1.52404e-22	0.0575802	0.00130815	0.000688902	0.835571
ZC3H13	0	0	0	0	0.479614	0.0528798	0.760984	1.323e-22	0.0576127	-0.000663535	0.000349477	0.835571
PUM1	0	0	0	0	0.483861	0.05171	0.76087	1.39868e-22	0.0576137	-0.00153474	0.000808335	0.835571
INS-IGF2	0	0	0	0	0.476507	0.0530235	0.754918	1.44782e-22	0.0576292	-0.00356381	0.00187715	0.835571
UQCRQ	0	0	0	0	0.477614	0.0537831	0.755818	1.3419e-22	0.0576364	0.00255926	0.00134806	0.835571
MTBP	0	0	0	0	0.477843	0.0534376	0.759086	1.54564e-22	0.0576782	-0.00113611	0.000598534	0.835571
LGALS3BP	0	0	0	0	0.484638	0.0528892	0.754002	1.47252e-22	0.0577312	0.00168903	0.00089002	0.835571
PDZRN4	0	0	0	0	0.486166	0.0543217	0.762942	1.63704e-22	0.0578592	0.000690053	0.000363802	0.835571
CLCF1	0	0	0	0	0.479415	0.052829	0.763514	1.77662e-22	0.0580045	-0.00196638	0.0010373	0.835571
TMEM60	0	0	0	0	0.479511	0.0531654	0.762007	1.6172e-22	0.058052	0.00333775	0.00176105	0.835571
CHRNB1	0	0	0	0	0.478573	0.0532858	0.759561	1.43367e-22	0.0581878	0.00140219	0.000740219	0.835571
PTH2	0	0	0	0	0.480597	0.0525574	0.757673	1.35285e-22	0.058245	0.00142984	0.000754983	0.835571
TEX261	0	0	0	0	0.48144	0.0530182	0.760702	1.58791e-22	0.0583606	-0.00144732	0.000764567	0.835571
CFAP54	0	0	0	0	0.487711	0.052287	0.74865	1.41708e-22	0.0583924	-0.000659555	0.000348463	0.835571
ST8SIA3	0	0	0	0	0.48669	0.0538466	0.762999	1.55111e-22	0.0584125	-0.00223955	0.00118332	0.835571
BCDIN3D	0	0	0	0	0.478921	0.0528931	0.752482	1.4807e-22	0.0584618	0.0011841	0.000625768	0.835571
SOGA1	0	0	0	0	0.482555	0.0530287	0.750375	1.55509e-22	0.0584725	0.000616831	0.000325994	0.835571
SLC6A9	0	0	0	0	0.478592	0.0520161	0.75092	1.62647e-22	0.0585477	0.00118321	0.00062551	0.835571
TRAPPC12	0	0	0	0	0.48204	0.0528881	0.763308	1.6868e-22	0.0585699	0.000599162	0.000316778	0.835571
SRL	0	0	0	0	0.485466	0.0523064	0.753068	1.58351e-22	0.0586075	-0.00139654	0.000738462	0.835571
C5orf47	0	0	0	0	0.483198	0.0534967	0.757813	1.58934e-22	0.0586584	-0.00100492	0.000531489	0.835571
TMEM74	0	0	0	0	0.480267	0.0529322	0.763192	1.42249e-22	0.058717	0.00203985	0.0010791	0.835571
NMNAT2	0	0	0	0	0.482185	0.0522366	0.76238	1.45708e-22	0.0587453	-0.00253158	0.00133938	0.835571
GAS2L1	0	0	0	0	0.480398	0.0523783	0.757039	1.21838e-22	0.0587641	-0.00120639	0.000638314	0.835571
PEX14	0	0	0	0	0.477145	0.0531837	0.763206	1.41295e-22	0.0587672	0.00142921	0.000756215	0.835571
GP1BB	0	0	0	0	0.480434	0.0529768	0.75415	1.26367e-22	0.0588189	-0.00139393	0.000737702	0.835571
SMIM14	0	0	0	0	0.474583	0.0532	0.75996	1.36311e-22	0.0589302	-0.00354265	0.00187568	0.835571
TLN2	0	0	0	0	0.480725	0.0528285	0.764676	1.21891e-22	0.0589759	-0.000399582	0.0002116	0.835571
CAMLG	0	0	0	0	0.479936	0.052303	0.756718	1.32858e-22	0.0590024	-0.00166661	0.000882651	0.835571
CDH8	0	0	0	0	0.477522	0.0530744	0.749871	1.20629e-22	0.0590297	-0.000660107	0.000349635	0.835571
HIST1H1E	0	0	0	0	0.48238	0.0529992	0.753984	1.63331e-22	0.059237	0.00120757	0.00064013	0.835571
SLFN5	0	0	0	0	0.478016	0.0525612	0.759226	1.53481e-22	0.0592925	-0.00150137	0.000796045	0.835571
DUOXA2	0	0	0	0	0.471341	0.0521027	0.7592	1.60684e-22	0.0594042	0.00148325	0.000786782	0.835571
ERCC8	0	0	0	0	0.484903	0.0531077	0.753628	1.4502e-22	0.0594087	0.000930849	0.000493774	0.835571
SLC24A4	0	0	0	0	0.475953	0.0532272	0.760885	1.54607e-22	0.0594444	0.000851109	0.000451539	0.835571
IMMT	0	0	0	0	0.48328	0.0520102	0.759093	1.52512e-22	0.0594993	-0.000749493	0.000397714	0.835571
RRP7A	0	0	0	0	0.472718	0.0524889	0.751379	1.66628e-22	0.0595168	0.00096329	0.000511199	0.835571
OGFOD1	0	0	0	0	0.478129	0.0518131	0.762292	1.39889e-22	0.0596308	0.00124286	0.000659859	0.835571
SHOC2	0	0	0	0	0.482186	0.0547592	0.755363	1.36546e-22	0.0596423	-0.00335933	0.00178361	0.835571
OR13C5	0	0	0	0	0.480498	0.0528988	0.75879	1.472e-22	0.0596713	-0.00127848	0.000678877	0.835571
IST1	0	0	0	0	0.481974	0.0533992	0.753912	1.64753e-22	0.0597497	0.00194104	0.00103101	0.835571
MEOX1	0	0	0	0	0.484404	0.0520507	0.75711	1.8345e-22	0.0597665	0.0019293	0.00102485	0.835571
MPI	0	0	0	0	0.481938	0.0534548	0.754384	1.27863e-22	0.0597677	-0.00155621	0.000826663	0.835571
KDM4C	0	0	0	0	0.484481	0.0518831	0.752942	1.37711e-22	0.0598	-0.0011499	0.000610907	0.835571
TUBGCP3	0	0	0	0	0.481551	0.0529973	0.756151	1.3816e-22	0.059809	-0.0015372	0.000816699	0.835571
KPNA5	0	0	0	0	0.478777	0.0523398	0.755213	1.38289e-22	0.0598598	-0.00178119	0.000946515	0.835571
STON1	0	0	0	0	0.479622	0.0519253	0.753201	1.62626e-22	0.0598826	0.00985927	0.00523963	0.835571
CLEC4M	0	0	0	0	0.48194	0.0517537	0.75221	1.34568e-22	0.0598914	-0.00253941	0.0013496	0.835571
TM9SF4	0	0	0	0	0.480649	0.0547486	0.748378	1.27263e-22	0.0599362	-0.00145345	0.000772587	0.835571
MFN1	0	0	0	0	0.480595	0.0535464	0.75389	1.29424e-22	0.0600318	0.00104812	0.000557342	0.835571
UBR7	0	0	0	0	0.471899	0.0534945	0.753782	1.4679e-22	0.0601201	0.00235301	0.00125165	0.835571
TMEM211	0	0	0	0	0.481795	0.0528173	0.761515	1.52232e-22	0.0601234	-0.00433495	0.00230594	0.835571
VARS	0	0	0	0	0.478146	0.0523957	0.762354	1.38226e-22	0.060143	-0.000758224	0.000403362	0.835571
TBCE	0	0	0	0	0.480693	0.0528797	0.762709	1.49094e-22	0.0601491	0.000793204	0.000421981	0.835571
SHROOM1	0	0	0	0	0.4818	0.052884	0.760134	1.29512e-22	0.0601516	-0.000801504	0.000426401	0.835571
CUL4A	0	0	0	0	0.476574	0.0539111	0.759102	1.45846e-22	0.0601745	-0.00168433	0.000896144	0.835571
PTPN6	0	0	0	0	0.479048	0.0529585	0.752533	1.4594e-22	0.0601763	-0.00110182	0.000586224	0.835571
KIAA1671	0	0	0	0	0.483096	0.0529175	0.755882	1.3164e-22	0.0602069	0.000869156	0.000462491	0.835571
DDX5	0	0	0	0	0.478139	0.0537109	0.763963	1.51338e-22	0.060257	-0.00243774	0.00129741	0.835571
HSDL2	0	0	0	0	0.476038	0.0531496	0.756414	1.5076e-22	0.0603241	0.001202	0.000639896	0.835571
MYZAP	0	0	0	0	0.480186	0.0534737	0.753492	1.48147e-22	0.0605373	-0.0055276	0.00294511	0.835571
TCTN3	0	0	0	0	0.483295	0.0528376	0.751422	1.67986e-22	0.06058	0.00132608	0.000706651	0.835571
B4GALT2	0	0	0	0	0.481913	0.0542001	0.753652	1.39234e-22	0.0605956	-0.00129574	0.000690526	0.835571
FBXO34	0	0	0	0	0.480695	0.0524152	0.762202	1.43639e-22	0.0605979	0.00192661	0.00102674	0.835571
CPLX2	0	0	0	0	0.477427	0.0527304	0.755734	1.55999e-22	0.0605988	-0.00303881	0.00161947	0.835571
HTN1	0	0	0	0	0.475522	0.0514153	0.759759	1.56916e-22	0.0606228	0.0115999	0.00618246	0.835571
ZNF391	0	0	0	0	0.477007	0.0529982	0.762616	1.70984e-22	0.0606316	-0.00186311	0.000993028	0.835571
CCNT2	0	0	0	0	0.483901	0.053828	0.757694	1.49496e-22	0.0606465	-0.00237609	0.00126652	0.835571
ZSCAN32	0	0	0	0	0.477512	0.0526838	0.754869	1.42365e-22	0.0607385	-0.00099908	0.000532726	0.835571
C11orf94	0	0	0	0	0.480072	0.0536282	0.753567	1.32809e-22	0.0607456	0.0018623	0.00099304	0.835571
NETO1	0	0	0	0	0.487753	0.0522784	0.759638	1.93474e-22	0.0608165	-0.00127299	0.000678985	0.835571
ZSCAN10	0	0	0	0	0.480356	0.0528827	0.763358	1.47995e-22	0.0608507	-0.000551629	0.000294266	0.835571
DIMT1	0	0	0	0	0.480062	0.0520903	0.751366	1.36042e-22	0.060857	-0.00142216	0.000758666	0.835571
NXT2	0	0	0	0	0.481927	0.0533423	0.74907	1.50922e-22	0.0609177	0.00584997	0.00312147	0.835571
TGFBR3	0	0	0	0	0.477986	0.0525418	0.752437	1.64918e-22	0.060976	0.00101612	0.000542311	0.835571
EPGN	0	0	0	0	0.484735	0.0531397	0.7532	1.47566e-22	0.0609961	0.0028148	0.0015024	0.835571
MAIP1	0	0	0	0	0.476228	0.052758	0.765003	1.59722e-22	0.0610084	0.00208909	0.0011151	0.835571
RBM7	0	0	0	0	0.479143	0.0539675	0.753746	1.48558e-22	0.0610428	0.00198105	0.00105757	0.835571
ATXN3	0	0	0	0	0.480273	0.0529811	0.754631	1.37212e-22	0.0610509	0.00242325	0.00129368	0.835571
NEK9	0	0	0	0	0.478072	0.0534076	0.75842	1.45655e-22	0.0610963	-0.000881123	0.000470481	0.835571
RHBDL1	0	0	0	0	0.481402	0.052792	0.762707	1.37166e-22	0.0611612	0.00118599	0.000633423	0.835571
CENPF	0	0	0	0	0.480754	0.0523068	0.762267	1.69565e-22	0.0612263	0.000474197	0.000253328	0.835571
PTPN3	0	0	0	0	0.485903	0.0531507	0.758299	1.64946e-22	0.0612961	0.00083696	0.000447245	0.835571
C8orf59	0	0	0	0	0.478539	0.0530857	0.750067	1.58054e-22	0.0613045	0.00359652	0.00192193	0.835571
COX6B2	0	0	0	0	0.481016	0.0541438	0.765547	2.07517e-22	0.0613397	-0.00221175	0.00118209	0.835571
SCN3A	0	0	0	0	0.480539	0.0532202	0.761218	1.45794e-22	0.0613735	0.000828929	0.000443085	0.835571
INTS9	0	0	0	0	0.480842	0.0530498	0.749706	1.52096e-22	0.0614057	0.00104981	0.000561222	0.835571
ATE1	0	0	0	0	0.482724	0.0540275	0.763175	1.55313e-22	0.0614109	0.00131921	0.000705254	0.835571
CCDC107	0	0	0	0	0.482175	0.0529297	0.76087	1.59702e-22	0.0614204	-0.00285022	0.0015238	0.835571
ESAM	0	0	0	0	0.480973	0.0523407	0.752076	1.57975e-22	0.0614427	0.00101101	0.000540555	0.835571
FBXO43	0	0	0	0	0.48191	0.0529459	0.757754	1.47512e-22	0.0614655	-0.00185781	0.000993402	0.835571
ENPP2	0	0	0	0	0.478948	0.0536561	0.759734	1.31203e-22	0.0615809	-0.000471459	0.000252209	0.836527
GABPB1	0	0	0	0	0.48537	0.0532035	0.754029	1.38424e-22	0.0616315	0.00188312	0.00100758	0.836602
CT47B1	0	0	0	0	0.477281	0.053237	0.755912	1.64338e-22	0.0617239	0.0026563	0.00142178	0.836909
TMEM217	0	0	0	0	0.480343	0.0533521	0.753779	1.35672e-22	0.061766	0.00293428	0.00157082	0.836909
PSD4	0	0	0	0	0.483627	0.0529057	0.754124	1.38817e-22	0.0618075	-0.000630286	0.000337468	0.836909
MEX3B	0	0	0	0	0.485946	0.053385	0.755623	1.69179e-22	0.0618346	-0.00177651	0.000951281	0.836909
FAM163A	0	0	0	0	0.480145	0.0529208	0.767588	1.60087e-22	0.0619915	-0.00267255	0.00143195	0.838422
PSG4	0	0	0	0	0.48285	0.0527049	0.759531	1.30771e-22	0.0620702	-0.00156027	0.000836244	0.838874
OSBP2	0	0	0	0	0.477114	0.0525823	0.752562	1.29633e-22	0.0621986	-0.000604273	0.000324025	0.839135
RPLP0	0	0	0	0	0.485044	0.0533619	0.757391	1.72695e-22	0.0622363	0.00257805	0.00138261	0.839135
ARMC5	0	0	0	0	0.480379	0.0525466	0.751252	1.73853e-22	0.0622536	0.000742985	0.00039849	0.839135
PNLDC1	0	0	0	0	0.476118	0.0526521	0.765523	1.64664e-22	0.0622831	0.00120396	0.000645803	0.839135
TEX30	0	0	0	0	0.486887	0.0527206	0.756623	1.73207e-22	0.0623419	0.002088	0.00112025	0.839135
DDX60	0	0	0	0	0.475134	0.0518406	0.754228	1.58847e-22	0.0623608	0.00109315	0.000586534	0.839135
PFKFB4	0	0	0	0	0.476826	0.0537837	0.75866	1.58682e-22	0.0624325	-0.00140593	0.000754566	0.839491
STARD8	0	0	0	0	0.479393	0.0528361	0.757539	1.58373e-22	0.0625533	0.00133352	0.000716033	0.839984
SAE1	0	0	0	0	0.478792	0.0518406	0.759195	1.33814e-22	0.0626033	-0.00192874	0.00103583	0.839984
JPH3	0	0	0	0	0.482959	0.052432	0.757569	1.4922e-22	0.062605	0.000731889	0.000393066	0.839984
NOB1	0	0	0	0	0.48504	0.0527974	0.760669	1.29808e-22	0.0627224	-0.0004773	0.000256452	0.84068
NEK7	0	0	0	0	0.481545	0.0540023	0.752931	1.25842e-22	0.0627474	0.00119683	0.000643115	0.84068
TSPAN33	0	0	0	0	0.479729	0.0526725	0.756795	1.55192e-22	0.0628728	-0.00181144	0.000973838	0.841752
ZFR	0	0	0	0	0.482666	0.053586	0.760923	1.47798e-22	0.0629323	-0.0020817	0.00111938	0.841829
ZEB1	0	0	0	0	0.47783	0.0524422	0.757997	1.3823e-22	0.0630169	-0.000916653	0.000493066	0.841829
NRBF2	0	0	0	0	0.479851	0.0542626	0.754261	1.61848e-22	0.0630349	-0.00113166	0.00060876	0.841829
NAIF1	0	0	0	0	0.481768	0.0526276	0.755305	1.21825e-22	0.0630886	0.00105875	0.000569653	0.841829
C16orf87	0	0	0	0	0.480518	0.0527469	0.757692	1.49237e-22	0.0631054	0.00352389	0.00189613	0.841829
TP53I3	0	0	0	0	0.476707	0.053692	0.749607	1.7378e-22	0.0631711	0.0010887	0.000585953	0.8421
EBF3	0	0	0	0	0.474751	0.0519102	0.760152	1.40065e-22	0.0633042	-0.00224787	0.00121044	0.843078
GOLGA8K	0	0	0	0	0.48129	0.0534393	0.754727	1.60689e-22	0.0633353	0.0264079	0.0142219	0.843078
CORO1A	0	0	0	0	0.475375	0.0524872	0.75578	1.57198e-22	0.0634239	0.00101504	0.000546831	0.843598
FAM81A	0	0	0	0	0.481139	0.0525306	0.762198	1.58038e-22	0.0634736	0.0012287	0.000662061	0.843598
HYI	0	0	0	0	0.473374	0.0523542	0.756338	1.2389e-22	0.06367	0.000943736	0.00050889	0.843598
MCFD2	0	0	0	0	0.480074	0.0528759	0.759915	1.63824e-22	0.0637251	0.00291874	0.0015742	0.843598
GPC4	0	0	0	0	0.480616	0.0533521	0.762433	1.59671e-22	0.0637399	-0.0017403	0.000938667	0.843598
PIGO	0	0	0	0	0.47645	0.0523191	0.757686	1.68356e-22	0.0638044	0.000661811	0.000357049	0.843598
HSD3B1	0	0	0	0	0.479543	0.0541454	0.749535	1.51398e-22	0.0638177	-0.000872337	0.000470651	0.843598
ONECUT3	0	0	0	0	0.483182	0.0524839	0.754746	1.50144e-22	0.0638557	-0.00194307	0.0010485	0.843598
OR2W1	0	0	0	0	0.479933	0.0529599	0.760451	1.57033e-22	0.0638614	0.00225217	0.00121531	0.843598
SDHD	0	0	0	0	0.47782	0.0521831	0.75706	1.92437e-22	0.0638898	0.00109357	0.000590173	0.843598
SIK2	0	0	0	0	0.478846	0.053703	0.757737	1.12132e-22	0.063902	0.00109859	0.000592912	0.843598
LRRC36	0	0	0	0	0.481931	0.053231	0.759651	1.52358e-22	0.06392	0.000778768	0.00042033	0.843598
NR1H4	0	0	0	0	0.479898	0.0532557	0.762591	1.54324e-22	0.0640042	-0.000985592	0.000532129	0.843646
LRRN4CL	0	0	0	0	0.474729	0.0527961	0.755977	1.54548e-22	0.0640352	0.00238553	0.00128812	0.843646
GART	0	0	0	0	0.488949	0.0532041	0.754673	1.6223e-22	0.06406	-0.000936071	0.000505499	0.843646
CCDC28B	0	0	0	0	0.473918	0.052695	0.756691	1.89e-22	0.0641731	0.000954587	0.000515717	0.844352
SAP30BP	0	0	0	0	0.47653	0.0542618	0.755113	1.50865e-22	0.0642617	0.00164436	0.000888663	0.844352
CPTP	0	0	0	0	0.480187	0.0530454	0.751649	1.3131e-22	0.0642845	-0.0013018	0.000703591	0.844352
EEF1D	0	0	0	0	0.482279	0.0530229	0.756175	1.53542e-22	0.0642956	-0.000812534	0.000439174	0.844352
ZNF175	0	0	0	0	0.483153	0.0530533	0.751362	1.40003e-22	0.0643727	-0.00170561	0.00092215	0.844528
ASPH	0	0	0	0	0.480893	0.0534369	0.753376	1.3644e-22	0.064402	-0.000856522	0.000463135	0.844528
FMC1	0	0	0	0	0.481025	0.053819	0.762101	1.45716e-22	0.0644455	-0.00390378	0.00211118	0.844528
ATP2B3	0	0	0	0	0.479559	0.0531362	0.760863	1.44175e-22	0.0645178	0.001365	0.000738396	0.844739
SLC20A1	0	0	0	0	0.479697	0.0529696	0.753935	1.46861e-22	0.0645527	-0.00153891	0.00083258	0.844739
FSTL3	0	0	0	0	0.479015	0.052291	0.747929	1.52471e-22	0.0646194	0.0015629	0.00084577	0.845015
PARN	0	0	0	0	0.481386	0.052747	0.75659	1.45516e-22	0.0647541	-0.00115898	0.000627506	0.845839
ZNF772	0	0	0	0	0.480148	0.0528073	0.747886	1.28016e-22	0.0647885	0.000394951	0.000213865	0.845839
ZNF479	0	0	0	0	0.477772	0.0522155	0.750975	1.39543e-22	0.0648191	-0.0023164	0.00125447	0.845839
LRRC15	0	0	0	0	0.477813	0.0531069	0.753891	1.53129e-22	0.0649503	0.00119822	0.000649226	0.846096
C1orf105	0	0	0	0	0.48221	0.0540247	0.761277	1.53348e-22	0.0650001	0.00476435	0.00258192	0.846096
TRIM28	0	0	0	0	0.47607	0.052971	0.76012	1.47953e-22	0.0650391	0.000994316	0.000538923	0.846096
KLK1	0	0	0	0	0.468543	0.0523452	0.763146	1.90847e-22	0.065066	-0.00180127	0.000976391	0.846096
GPR135	0	0	0	0	0.481343	0.0531041	0.756794	1.74356e-22	0.0650853	-0.00121843	0.000660506	0.846096
MOS	0	0	0	0	0.480741	0.0522642	0.758938	1.5975e-22	0.0651165	0.00170984	0.000927006	0.846096
YTHDF2	0	0	0	0	0.480534	0.0525945	0.753458	1.61683e-22	0.065209	-0.00178502	0.000968099	0.846096
OIT3	0	0	0	0	0.477757	0.0529517	0.754483	1.54864e-22	0.0652448	-0.00128437	0.000696669	0.846096
CD300LB	0	0	0	0	0.480016	0.052528	0.751783	1.58773e-22	0.0652491	0.00206559	0.00112043	0.846096
BCL2	0	0	0	0	0.479389	0.0531376	0.758572	1.50483e-22	0.0653571	0.00686304	0.0037242	0.84634
ECHDC3	0	0	0	0	0.480353	0.0522696	0.754818	1.42735e-22	0.0653592	0.00210595	0.0011428	0.84634
PSME4	0	0	0	0	0.477685	0.0526396	0.761243	1.70841e-22	0.0654491	-0.000824755	0.000447703	0.846559
CIAPIN1	0	0	0	0	0.484054	0.0515009	0.760096	1.3414e-22	0.0654673	-0.000869081	0.000471796	0.846559
PTP4A1	0	0	0	0	0.47555	0.0540649	0.756712	1.57249e-22	0.0655728	-0.00543588	0.00295212	0.847123
MMADHC	0	0	0	0	0.478011	0.0530794	0.75605	1.55985e-22	0.0656494	-0.00128689	0.000699081	0.847123
KLF8	0	0	0	0	0.479114	0.0536229	0.747084	1.38871e-22	0.0656765	0.00130438	0.000708656	0.847123
RPL10L	0	0	0	0	0.484002	0.0530929	0.76036	1.51373e-22	0.0657024	0.00204687	0.00111215	0.847123
ZNF534	0	0	0	0	0.481445	0.0520702	0.76304	1.41226e-22	0.0658499	-0.00123257	0.000670073	0.847123
DEFB124	0	0	0	0	0.482185	0.0526627	0.75199	1.62044e-22	0.0659464	-0.00217982	0.00118546	0.847123
C3orf36	0	0	0	0	0.477956	0.0520768	0.756154	1.39276e-22	0.0659544	0.00464609	0.00252677	0.847123
PFKFB2	0	0	0	0	0.477035	0.0527765	0.761652	1.32642e-22	0.066015	-0.000991481	0.000539336	0.847123
ERO1A	0	0	0	0	0.479084	0.0543713	0.753316	1.25989e-22	0.0660499	-0.00173361	0.000943152	0.847123
CCDC126	0	0	0	0	0.482785	0.0525764	0.755198	1.60817e-22	0.0660661	-0.00552749	0.00300736	0.847123
CLU	0	0	0	0	0.474726	0.0522957	0.756556	1.57703e-22	0.066139	0.00175009	0.000952433	0.847123
IL6ST	0	0	0	0	0.477196	0.0539413	0.752692	1.24493e-22	0.0661641	-0.00117853	0.000641438	0.847123
TP73	0	0	0	0	0.482204	0.0526504	0.761509	1.46942e-22	0.0662033	0.00115114	0.000626624	0.847123
KCNIP4	0	0	0	0	0.477261	0.0536881	0.757255	1.45557e-22	0.066298	-0.00268031	0.00145953	0.847123
PRR13	0	0	0	0	0.474924	0.052666	0.757208	1.46279e-22	0.0663704	0.00334193	0.00182029	0.847123
ANXA2	0	0	0	0	0.476152	0.05411	0.749608	1.42994e-22	0.0664096	0.00166617	0.000907665	0.847123
HOMER3	0	0	0	0	0.47612	0.0521207	0.75692	1.62563e-22	0.0664352	-0.000790105	0.00043046	0.847123
OR7A17	0	0	0	0	0.481576	0.052775	0.75957	1.41533e-22	0.066472	0.00308719	0.00168217	0.847123
PHF20	0	0	0	0	0.473708	0.0517944	0.75699	1.47965e-22	0.0665324	0.00107454	0.000585633	0.847123
SLFN13	0	0	0	0	0.479245	0.0530962	0.749374	1.17556e-22	0.0665593	-0.000946859	0.000516097	0.847123
CDKN1B	0	0	0	0	0.475172	0.0526043	0.750376	1.65688e-22	0.066561	0.0024569	0.00133917	0.847123
CENPH	0	0	0	0	0.484031	0.0528486	0.749756	1.34553e-22	0.0665804	-0.00270443	0.0014742	0.847123
TXNDC9	0	0	0	0	0.476623	0.0526981	0.756192	1.6118e-22	0.0666455	-0.00296907	0.00161884	0.847123
WNT9A	0	0	0	0	0.486539	0.0536789	0.75223	1.34306e-22	0.0667215	0.000992749	0.000541432	0.847123
MROH1	0	0	0	0	0.483923	0.0532345	0.759767	1.34188e-22	0.0667269	-0.00134477	0.000733433	0.847123
BRIX1	0	0	0	0	0.476005	0.0529435	0.754486	1.59373e-22	0.0667317	0.0015157	0.000826676	0.847123
KLHL4	0	0	0	0	0.478021	0.0539045	0.758164	1.5752e-22	0.0667578	0.00235861	0.00128653	0.847123
PRPF6	0	0	0	0	0.479258	0.052325	0.754328	1.40955e-22	0.0667892	-0.00140986	0.00076911	0.847123
C4orf3	0	0	0	0	0.477126	0.0526946	0.756809	1.94904e-22	0.0668353	-0.00311264	0.0016983	0.847129
LILRB1	0	0	0	0	0.485358	0.0529553	0.756134	1.69394e-22	0.0669809	0.00104812	0.000572174	0.847551
TNNT2	0	0	0	0	0.474713	0.0528118	0.756757	1.58125e-22	0.0669998	0.00160126	0.000874197	0.847551
SERPINE1	0	0	0	0	0.475876	0.0513734	0.756567	1.74412e-22	0.0670057	-0.00181962	0.000993432	0.847551
AFF3	0	0	0	0	0.483752	0.0519171	0.762448	1.46856e-22	0.0672039	-0.00103173	0.000563686	0.849479
DCAF5	0	0	0	0	0.484108	0.0527916	0.762987	1.84128e-22	0.067363	0.000976662	0.000533911	0.850337
RPUSD2	0	0	0	0	0.479719	0.0525775	0.74973	1.38872e-22	0.0674201	0.000883546	0.000483108	0.850337
TMEM176B	0	0	0	0	0.483493	0.0533973	0.756558	1.39167e-22	0.0674489	0.00275201	0.00150491	0.850337
AP3B2	0	0	0	0	0.47748	0.0534652	0.765928	1.42516e-22	0.067455	-0.00125078	0.000683994	0.850337
RGN	0	0	0	0	0.480392	0.0518393	0.754782	1.43424e-22	0.0676999	-0.00152583	0.000835147	0.85239
IFNL4	0	0	0	0	0.476513	0.0521168	0.75279	1.68021e-22	0.0677098	0.00400902	0.00219438	0.85239
SLC30A4	0	0	0	0	0.479617	0.0528121	0.761415	1.48847e-22	0.0678326	0.00213009	0.00116645	0.852715
ZNF136	0	0	0	0	0.482882	0.053249	0.757192	1.39458e-22	0.0678734	-0.00198372	0.00108646	0.852715
TMEM176A	0	0	0	0	0.474975	0.051795	0.758194	1.55079e-22	0.0679593	-0.00163931	0.000898111	0.852715
PTGR2	0	0	0	0	0.479931	0.0529843	0.754138	1.6452e-22	0.0679611	0.00109417	0.000599454	0.852715
GCSAM	0	0	0	0	0.482987	0.0522913	0.760014	1.52526e-22	0.0679654	-0.00400961	0.00219675	0.852715
NANOGNB	0	0	0	0	0.47944	0.0525721	0.753064	1.51908e-22	0.0681305	0.0019611	0.00107507	0.854209
TMEM165	0	0	0	0	0.473421	0.0528683	0.762497	1.36608e-22	0.0682644	-0.00259479	0.00142315	0.854691
OR10G7	0	0	0	0	0.477494	0.0524637	0.75349	1.58847e-22	0.0683054	0.00231836	0.00127173	0.854691
IL27	0	0	0	0	0.476014	0.0536838	0.752466	1.39934e-22	0.0683239	-0.00233648	0.00128175	0.854691
CGB1	0	0	0	0	0.479582	0.0526729	0.765288	1.45888e-22	0.0683531	0.00182522	0.00100139	0.854691
TNFRSF19	0	0	0	0	0.477335	0.0538204	0.758045	1.44023e-22	0.0685095	0.00147037	0.000807159	0.856069
FJX1	0	0	0	0	0.483878	0.0536315	0.756277	1.55009e-22	0.0686494	-0.000861349	0.000473078	0.856669
STK11	0	0	0	0	0.473659	0.0531433	0.756304	1.66732e-22	0.0686498	0.00203472	0.00111753	0.856669
GALM	0	0	0	0	0.479772	0.0523295	0.75849	1.54532e-22	0.0688553	-0.000825831	0.000453907	0.857644
ADGRE3	0	0	0	0	0.472276	0.0520527	0.760714	1.58894e-22	0.0688801	0.000722991	0.000397418	0.857644
LILRA2	0	0	0	0	0.474527	0.0519927	0.756193	1.46301e-22	0.0689252	-0.00125644	0.000690762	0.857644
GJA1	0	0	0	0	0.474257	0.0527425	0.752825	1.52607e-22	0.0689352	0.00352258	0.0019367	0.857644
C7orf26	0	0	0	0	0.47874	0.0531958	0.759907	1.61835e-22	0.0689591	0.00130735	0.000718839	0.857644
SLC1A6	0	0	0	0	0.484093	0.0525815	0.75585	1.5006e-22	0.0690326	0.00118274	0.000650493	0.857851
TCTE1	0	0	0	0	0.481918	0.0525926	0.759227	1.45468e-22	0.0690945	-0.000790036	0.000434608	0.857851
GINS2	0	0	0	0	0.475634	0.0533183	0.75398	1.41913e-22	0.0691375	0.00166007	0.000913365	0.857851
CLPSL2	0	0	0	0	0.479507	0.0525044	0.759899	1.37969e-22	0.0692185	-0.00484339	0.00266559	0.857851
NAA25	0	0	0	0	0.478978	0.0532096	0.761626	1.57802e-22	0.0692566	-0.00118697	0.000653347	0.857851
SKI	0	0	0	0	0.483477	0.0537435	0.759987	1.70275e-22	0.069264	-0.00134908	0.000742596	0.857851
BBS7	0	0	0	0	0.483078	0.0533734	0.760169	1.6759e-22	0.0692994	-0.000937071	0.000515873	0.857851
STEAP1	0	0	0	0	0.48106	0.0526022	0.759222	1.48011e-22	0.0695708	0.00214187	0.00118028	0.858438
KIR3DL1	0	0	0	0	0.480526	0.0523208	0.74788	1.29237e-22	0.069698	-0.0043129	0.00237772	0.858438
VKORC1L1	0	0	0	0	0.478554	0.0535922	0.750554	1.41888e-22	0.0697033	-0.00367166	0.00202424	0.858438
CHGA	0	0	0	0	0.475871	0.0522443	0.767253	1.5218e-22	0.0698003	0.00085696	0.000472618	0.858438
RHOA	0	0	0	0	0.479483	0.0519554	0.759174	1.48275e-22	0.069913	0.00800692	0.00441764	0.858438
ZSWIM8	0	0	0	0	0.47071	0.0524649	0.752949	1.62176e-22	0.0699244	0.000813715	0.000448968	0.858438
SLC18A3	0	0	0	0	0.481484	0.0541036	0.759792	1.45129e-22	0.0699363	-0.00148847	0.0008213	0.858438
ETS1	0	0	0	0	0.481363	0.0531932	0.75876	1.91541e-22	0.0699548	-0.000974179	0.000537562	0.858438
KLF3	0	0	0	0	0.480091	0.0524309	0.756212	1.46437e-22	0.0700231	-0.00246682	0.00136155	0.858438
MMP3	0	0	0	0	0.473891	0.0530158	0.758205	1.67146e-22	0.0700407	0.00101342	0.000559389	0.858438
AKR7A3	0	0	0	0	0.474557	0.052578	0.76136	1.5184e-22	0.0700462	-0.000779119	0.000430066	0.858438
CMPK1	0	0	0	0	0.475491	0.0526891	0.760108	1.45011e-22	0.0700768	0.00319276	0.00176256	0.858438
THRSP	0	0	0	0	0.47778	0.0536092	0.757085	1.61711e-22	0.0700821	-0.00193753	0.00106964	0.858438
C1S	0	0	0	0	0.483005	0.0533497	0.757805	1.50793e-22	0.0701307	0.00084392	0.000465976	0.858438
C4orf45	0	0	0	0	0.483993	0.0534035	0.756407	1.76008e-22	0.0701503	0.00250336	0.00138234	0.858438
ZNF653	0	0	0	0	0.483897	0.0530692	0.756181	1.42605e-22	0.0702515	-0.00105816	0.000584524	0.858438
ZMAT2	0	0	0	0	0.475429	0.053256	0.760217	1.50757e-22	0.0702613	-0.00488142	0.00269656	0.858438
SLC4A4	0	0	0	0	0.478279	0.0530831	0.763165	1.46076e-22	0.0702717	-0.000703753	0.000388778	0.858438
RRBP1	0	0	0	0	0.474865	0.0523631	0.754315	1.68733e-22	0.0703047	-0.000492213	0.000271947	0.858438
NDN	0	0	0	0	0.476413	0.0520985	0.762409	1.67345e-22	0.070305	0.00264552	0.00146165	0.858438
NSMAF	0	0	0	0	0.480873	0.0522654	0.75283	1.37535e-22	0.070321	-0.000765741	0.000423096	0.858438
ITGAL	0	0	0	0	0.482398	0.0531042	0.755188	1.52691e-22	0.0704107	-0.00168497	0.000931295	0.858438
EFCAB12	0	0	0	0	0.482162	0.0531197	0.755036	1.41733e-22	0.0704489	0.00118012	0.000652352	0.858438
NT5C1A	0	0	0	0	0.477387	0.0528487	0.761655	1.848e-22	0.0704571	-0.000796806	0.000440474	0.858438
ABRAXAS2	0	0	0	0	0.482346	0.0522981	0.754615	1.61804e-22	0.0705413	0.00128285	0.000709371	0.8586
MKRN2	0	0	0	0	0.481527	0.0517829	0.756263	1.53114e-22	0.0705629	-0.00151086	0.000835519	0.8586
UXS1	0	0	0	0	0.482294	0.0538366	0.762628	1.32942e-22	0.0706305	-0.0019114	0.00105727	0.858631
SMYD5	0	0	0	0	0.480061	0.0543978	0.753778	1.52016e-22	0.070658	0.000684045	0.00037841	0.858631
CDADC1	0	0	0	0	0.479633	0.0531201	0.759258	1.59675e-22	0.0707813	-0.00203473	0.00112609	0.858888
SGCG	0	0	0	0	0.483327	0.0527826	0.752281	1.70451e-22	0.0707888	0.00157039	0.000869136	0.858888
NUP54	0	0	0	0	0.485877	0.0538077	0.756979	1.59447e-22	0.070832	-0.00198254	0.00109741	0.858888
TMEM74B	0	0	0	0	0.476069	0.0523914	0.752881	1.52575e-22	0.0708643	0.00143458	0.000794185	0.858888
FAM117B	0	0	0	0	0.479516	0.0520222	0.755635	1.64467e-22	0.0709366	0.0011723	0.000649153	0.859203
CAMSAP2	0	0	0	0	0.481368	0.0529519	0.754233	1.67597e-22	0.0710669	0.00138193	0.000765585	0.85967
TPT1	0	0	0	0	0.484092	0.0527629	0.755225	1.39708e-22	0.0711075	0.0037118	0.00205662	0.85967
PLAT	0	0	0	0	0.478872	0.0537123	0.753058	1.62027e-22	0.0711141	-0.000878179	0.00048659	0.85967
OSGIN2	0	0	0	0	0.480376	0.0521481	0.751199	1.52065e-22	0.0712949	0.00184051	0.00102046	0.859861
LRP3	0	0	0	0	0.478891	0.0523698	0.76228	1.98539e-22	0.071381	-0.000640219	0.000355073	0.859861
STARD3NL	0	0	0	0	0.479075	0.052982	0.756593	1.48406e-22	0.0714216	-0.00375482	0.00208277	0.859861
PAPPA2	0	0	0	0	0.474995	0.0532179	0.752968	1.52471e-22	0.0714503	0.000819969	0.000454877	0.859861
GPD1	0	0	0	0	0.478348	0.0519769	0.754667	1.47519e-22	0.0715449	0.000804448	0.000446415	0.859861
ASB7	0	0	0	0	0.477535	0.0528556	0.753136	1.65544e-22	0.0715605	-0.00364315	0.00202182	0.859861
TRAPPC3L	0	0	0	0	0.484296	0.0523165	0.759692	1.36025e-22	0.0715883	-0.00157474	0.000874011	0.859861
ASPG	0	0	0	0	0.479007	0.0534084	0.752227	1.27765e-22	0.0716379	-0.00080957	0.000449405	0.859861
RAB33B	0	0	0	0	0.473782	0.0534688	0.760321	1.67753e-22	0.0717126	0.000831606	0.000461759	0.859861
LRRC28	0	0	0	0	0.476769	0.0532489	0.754194	1.9749e-22	0.0717127	-0.00121571	0.000675038	0.859861
SMKR1	0	0	0	0	0.477536	0.0533699	0.748374	1.34111e-22	0.0717305	-0.00329755	0.00183112	0.859861
PSPN	0	0	0	0	0.486484	0.0523748	0.766719	1.53702e-22	0.071777	-0.00129731	0.00072051	0.859861
KHSRP	0	0	0	0	0.480513	0.0532019	0.752322	1.46601e-22	0.0717956	0.00177763	0.000987338	0.859861
PACSIN3	0	0	0	0	0.483243	0.0533353	0.755375	1.45587e-22	0.0718232	0.00105361	0.000585255	0.859861
SPANXN5	0	0	0	0	0.477725	0.0521745	0.755603	1.51862e-22	0.0718981	-0.0304924	0.0169423	0.859861
SLC15A3	0	0	0	0	0.476328	0.0531163	0.75195	1.19317e-22	0.0720298	0.000749057	0.000416387	0.859861
OR11L1	0	0	0	0	0.477486	0.0534001	0.76435	1.73053e-22	0.0720684	-0.00150683	0.00083773	0.859861
XPO4	0	0	0	0	0.481049	0.0534818	0.761275	1.27226e-22	0.0721538	0.00129936	0.000722603	0.859861
SLC25A18	0	0	0	0	0.480413	0.053553	0.756408	1.44766e-22	0.0721923	0.00194989	0.00108453	0.859861
RNASEH1	0	0	0	0	0.480636	0.0541184	0.759563	1.67835e-22	0.0722216	0.00217543	0.00121009	0.859861
SORCS2	0	0	0	0	0.479164	0.0533726	0.753253	1.60316e-22	0.0722434	-0.000770181	0.000428451	0.859861
TMEM57	0	0	0	0	0.477852	0.0523257	0.753205	1.45151e-22	0.0722616	-0.0024153	0.00134371	0.859861
TOR1AIP2	0	0	0	0	0.479752	0.0532461	0.758301	1.5936e-22	0.0722827	-0.0014392	0.000800738	0.859861
PTK6	0	0	0	0	0.472395	0.0529951	0.756515	1.45705e-22	0.0722981	0.00155395	0.000864624	0.859861
UBE2Q1	0	0	0	0	0.47851	0.0529733	0.758412	1.37028e-22	0.0723238	-0.00203742	0.00113373	0.859861
ZNF688	0	0	0	0	0.475911	0.0526202	0.758724	1.47773e-22	0.0724092	0.00168596	0.00093844	0.859861
MROH8	0	0	0	0	0.480906	0.0524608	0.755063	2.00983e-22	0.0724224	0.000727432	0.000404924	0.859861
TMPRSS12	0	0	0	0	0.488627	0.0538387	0.760421	1.44116e-22	0.0724274	-0.00101072	0.000562625	0.859861
CSF3R	0	0	0	0	0.475558	0.0532433	0.76619	1.82772e-22	0.0726126	0.000505645	0.000281653	0.859929
TPM3	0	0	0	0	0.479531	0.0531983	0.755846	1.51177e-22	0.0727733	-0.00372105	0.00207386	0.859929
ATP5E	0	0	0	0	0.484589	0.0518259	0.751833	1.476e-22	0.0728758	0.0042052	0.00234453	0.859929
LUM	0	0	0	0	0.478089	0.0532446	0.754685	1.45324e-22	0.0728903	-0.000977515	0.000545022	0.859929
MYCT1	0	0	0	0	0.479146	0.0534601	0.769166	1.8665e-22	0.0729161	0.000654978	0.000365222	0.859929
SLC1A1	0	0	0	0	0.477625	0.0534709	0.752923	1.40096e-22	0.0731078	-0.00115882	0.000646602	0.859929
BCAR1	0	0	0	0	0.47856	0.053346	0.757868	1.53727e-22	0.0731095	0.000494771	0.000276075	0.859929
PLA2G4E	0	0	0	0	0.476944	0.0528492	0.750288	1.46708e-22	0.073154	0.000720188	0.000401917	0.859929
DTX3	0	0	0	0	0.481127	0.0536765	0.75468	1.43653e-22	0.0732894	-0.00388118	0.002167	0.859929
OR4D11	0	0	0	0	0.484811	0.052166	0.75341	1.4737e-22	0.0732928	0.00210235	0.00117383	0.859929
PDE6H	0	0	0	0	0.483664	0.0530229	0.755672	1.53057e-22	0.0733016	-0.00278669	0.00155598	0.859929
IFIT1	0	0	0	0	0.478284	0.0514336	0.754777	2.05966e-22	0.0733052	-0.00119469	0.000667074	0.859929
CHD1L	0	0	0	0	0.477286	0.0529271	0.752257	1.5148e-22	0.0733064	-0.000747748	0.000417519	0.859929
EIF3K	0	0	0	0	0.48016	0.0527468	0.753915	1.43891e-22	0.0733448	-0.00175989	0.000982799	0.859929
AKR1C4	0	0	0	0	0.4848	0.054535	0.750827	1.6644e-22	0.0733594	0.00140775	0.000786189	0.859929
RGS2	0	0	0	0	0.479687	0.0537348	0.755122	1.59513e-22	0.0733611	0.00182018	0.00101653	0.859929
CRHBP	0	0	0	0	0.476456	0.05264	0.754173	1.67291e-22	0.0733914	0.00120622	0.000673716	0.859929
KRTAP2-4	0	0	0	0	0.477063	0.0531011	0.759074	1.63359e-22	0.0733924	0.00115744	0.000646469	0.859929
SRSF2	0	0	0	0	0.486014	0.0526106	0.75533	1.57871e-22	0.0734701	0.00356808	0.00199344	0.859929
KYAT1	0	0	0	0	0.481052	0.0533413	0.756244	1.34679e-22	0.0735416	-0.00111972	0.00062573	0.859929
SH3TC2	0	0	0	0	0.480035	0.053469	0.766809	1.42235e-22	0.0735827	0.000436875	0.000244171	0.859929
NOP10	0	0	0	0	0.47923	0.0535133	0.75806	1.51551e-22	0.0735935	0.00463604	0.0025912	0.859929
CTSZ	0	0	0	0	0.484652	0.0524925	0.753871	1.21696e-22	0.0735966	0.000757975	0.000423656	0.859929
TOMM40L	0	0	0	0	0.480098	0.0524377	0.746022	1.54764e-22	0.0736634	0.0014361	0.000802867	0.859929
CR1	0	0	0	0	0.48651	0.0537973	0.76093	1.40031e-22	0.0737004	-0.000705765	0.000394617	0.859929
TNFSF4	0	0	0	0	0.478588	0.0541247	0.754889	1.49882e-22	0.0737467	0.00444972	0.00248838	0.859929
C5AR1	0	0	0	0	0.478657	0.0519813	0.7574	1.52325e-22	0.0737833	-0.00115466	0.000645793	0.859929
MFSD6	0	0	0	0	0.478396	0.0535584	0.755745	1.67576e-22	0.0738187	-0.0010205	0.000570827	0.859929
MAP4K3	0	0	0	0	0.480168	0.0535289	0.750705	1.47398e-22	0.0738899	-0.000658988	0.000368704	0.859929
GON7	0	0	0	0	0.478226	0.0517169	0.752149	1.4616e-22	0.0739561	0.00345945	0.00193601	0.859929
EFEMP1	0	0	0	0	0.479699	0.0521672	0.750959	1.54286e-22	0.0740704	-0.0017923	0.00100342	0.859929
ZNF850	0	0	0	0	0.476061	0.0527426	0.753765	1.77914e-22	0.0740996	0.00104721	0.000586339	0.859929
FBXL21	0	0	0	0	0.475769	0.0525481	0.750808	1.67052e-22	0.0741046	0.00292348	0.0016369	0.859929
SCP2	0	0	0	0	0.484979	0.0528814	0.751676	1.31179e-22	0.074117	-0.00138056	0.00077303	0.859929
LYN	0	0	0	0	0.478744	0.0520392	0.752483	1.47984e-22	0.0741261	-0.00250607	0.00140329	0.859929
TESC	0	0	0	0	0.483775	0.0530082	0.755881	1.62027e-22	0.074149	0.00220778	0.00123636	0.859929
RPL31	0	0	0	0	0.48589	0.0533001	0.756979	1.83992e-22	0.0742286	0.00119971	0.000672024	0.859929
COPS7B	0	0	0	0	0.481366	0.0541209	0.757471	1.52568e-22	0.0742495	0.00246424	0.00138046	0.859929
ALDH3B2	0	0	0	0	0.481753	0.0540557	0.74877	1.70334e-22	0.0742702	0.000534858	0.000299647	0.859929
UBAP2L	0	0	0	0	0.473599	0.0525515	0.75652	1.58047e-22	0.0742868	0.00121354	0.000679911	0.859929
CMTM3	0	0	0	0	0.482425	0.0533229	0.753273	1.22846e-22	0.0743404	0.00219466	0.00122983	0.860012
LCK	0	0	0	0	0.477625	0.0522097	0.747679	1.24919e-22	0.0744883	-0.00218672	0.001226	0.861142
QSER1	0	0	0	0	0.479444	0.0530991	0.753025	1.79021e-22	0.0745538	-0.000783227	0.000439222	0.861142
SATB2	0	0	0	0	0.480198	0.0529393	0.750674	1.32719e-22	0.074713	0.00405617	0.00227589	0.861142
PPA2	0	0	0	0	0.477625	0.0537869	0.756089	1.3481e-22	0.0747266	0.000831134	0.000466365	0.861142
THAP12	0	0	0	0	0.476398	0.053823	0.759679	1.44003e-22	0.0747878	0.00125011	0.00070161	0.861142
MEIS3	0	0	0	0	0.475287	0.05309	0.761466	1.40132e-22	0.0748854	-0.000714773	0.000401292	0.861142
PAPD4	0	0	0	0	0.477154	0.0526968	0.760938	1.352e-22	0.0748952	-0.00119669	0.000671875	0.861142
NPAS4	0	0	0	0	0.477757	0.0540609	0.747077	1.34725e-22	0.0749664	-0.0014434	0.000810588	0.861142
DESI2	0	0	0	0	0.481948	0.0520921	0.754208	1.31171e-22	0.0750477	-0.00356613	0.00200324	0.861142
ANGPT4	0	0	0	0	0.481767	0.0520234	0.756666	1.46543e-22	0.0750508	-0.00112475	0.000631824	0.861142
PACSIN2	0	0	0	0	0.480257	0.0527203	0.76126	1.6062e-22	0.0750924	0.000596889	0.000335347	0.861142
LDHAL6A	0	0	0	0	0.475066	0.0524367	0.751336	1.60836e-22	0.0751372	0.00111824	0.000628349	0.861142
HOXC13	0	0	0	0	0.479556	0.0534726	0.749893	1.07701e-22	0.0751849	0.00147985	0.000831679	0.861142
MUL1	0	0	0	0	0.4784	0.0519943	0.750477	1.27148e-22	0.0752116	-0.00126936	0.000713449	0.861142
VWA7	0	0	0	0	0.479236	0.051717	0.76157	1.31286e-22	0.0752195	-0.000816486	0.000458922	0.861142
RPAP2	0	0	0	0	0.477521	0.0534325	0.754248	1.47691e-22	0.0752261	-0.00110924	0.000623487	0.861142
ZNF35	0	0	0	0	0.481527	0.0534025	0.751952	1.67796e-22	0.075227	0.00162358	0.00091259	0.861142
ADM2	0	0	0	0	0.483129	0.0522824	0.759234	1.97369e-22	0.0753013	0.00107167	0.000602523	0.861462
ZKSCAN8	0	0	0	0	0.47986	0.053101	0.755695	1.57291e-22	0.0755904	-0.00117303	0.000660163	0.86214
TRPM5	0	0	0	0	0.478509	0.0518873	0.754597	1.53063e-22	0.0756261	-0.000515397	0.000290093	0.86214
LONP1	0	0	0	0	0.48184	0.0531978	0.752545	1.33375e-22	0.0756412	0.00051916	0.000292226	0.86214
CTXN1	0	0	0	0	0.479903	0.0529316	0.750767	1.42383e-22	0.0756425	-0.00528987	0.00297759	0.86214
AGBL4	0	0	0	0	0.48054	0.0538741	0.759056	1.35268e-22	0.0756811	-0.00110889	0.000624259	0.86214
TAS2R8	0	0	0	0	0.481587	0.053782	0.750762	1.37082e-22	0.075701	-0.00087838	0.000494526	0.86214
ACOT12	0	0	0	0	0.479759	0.0529258	0.763097	1.38371e-22	0.0757727	0.000610506	0.000343797	0.86214
SLC25A22	0	0	0	0	0.47377	0.0530874	0.765314	1.37754e-22	0.0757765	-0.00175335	0.000987386	0.86214
TEAD1	0	0	0	0	0.476622	0.0523566	0.753931	1.42758e-22	0.0757787	-0.00213304	0.00120122	0.86214
TMEM183A	0	0	0	0	0.475179	0.0527908	0.755461	1.50257e-22	0.0758431	-0.00128336	0.00072288	0.862343
ATL2	0	0	0	0	0.475847	0.0537117	0.7574	1.28571e-22	0.0759026	-0.00111884	0.000630337	0.862492
KPNB1	0	0	0	0	0.475713	0.052694	0.760144	1.56628e-22	0.0760434	0.00314992	0.00177547	0.863562
NEGR1	0	0	0	0	0.481383	0.0528116	0.753772	1.46195e-22	0.0761371	-0.00185825	0.00104775	0.864098
GAP43	0	0	0	0	0.480783	0.0534364	0.753947	1.46455e-22	0.0763334	0.00143966	0.000812275	0.864961
TC2N	0	0	0	0	0.481951	0.0532034	0.755382	1.71213e-22	0.0763402	-0.00104148	0.000587632	0.864961
MBD6	0	0	0	0	0.480858	0.052587	0.763283	1.74826e-22	0.076353	-0.000680687	0.000384077	0.864961
PLK3	0	0	0	0	0.479869	0.0521122	0.759486	1.72347e-22	0.076538	0.000761186	0.000429769	0.866269
NOA1	0	0	0	0	0.481086	0.0537147	0.749369	1.31907e-22	0.0765619	0.000649241	0.000366594	0.866269
OR4S2	0	0	0	0	0.487108	0.0533735	0.760484	1.44258e-22	0.076674	0.00246978	0.00139509	0.867009
CHMP7	0	0	0	0	0.476928	0.0531885	0.753812	1.32521e-22	0.0767614	-0.00204957	0.00115808	0.867469
ANKRD1	0	0	0	0	0.477685	0.0534478	0.755813	1.43393e-22	0.076917	0.00117686	0.000665318	0.868698
XKRX	0	0	0	0	0.479087	0.053248	0.752639	1.34043e-22	0.0770097	-0.00132592	0.000749818	0.868752
DLX1	0	0	0	0	0.470589	0.0520661	0.757091	1.4986e-22	0.0770802	-0.00457035	0.00258519	0.868752
UBTF	0	0	0	0	0.474901	0.0528169	0.761999	1.58245e-22	0.0771034	0.00274255	0.00155143	0.868752
PDHA1	0	0	0	0	0.478553	0.0535916	0.764171	1.52582e-22	0.077109	-0.00408152	0.00230891	0.868752
STIM1	0	0	0	0	0.477977	0.0518475	0.756697	1.44054e-22	0.077228	-0.000942889	0.000533606	0.86951
USP18	0	0	0	0	0.483978	0.0522924	0.75881	1.49904e-22	0.077306	-0.00177635	0.00100555	0.86951
FABP9	0	0	0	0	0.480424	0.0526344	0.764769	1.22196e-22	0.0773632	-0.0017482	0.000989805	0.86951
ISLR	0	0	0	0	0.479016	0.0529585	0.761688	1.16796e-22	0.0773684	0.0010454	0.000591897	0.86951
EXT1	0	0	0	0	0.478244	0.0528328	0.757442	1.28985e-22	0.0774806	-0.00142312	0.000806066	0.86951
ZDHHC5	0	0	0	0	0.479686	0.0521924	0.749028	1.71388e-22	0.0774852	0.000948123	0.000537033	0.86951
TECPR1	0	0	0	0	0.474732	0.0528319	0.75791	1.5655e-22	0.0775043	-0.000631591	0.000357767	0.86951
TMEM259	0	0	0	0	0.477595	0.0534773	0.757636	1.53752e-22	0.0776386	-0.00118552	0.00067185	0.86969
ZFYVE9	0	0	0	0	0.477231	0.0526177	0.756592	1.34328e-22	0.0776586	0.000772496	0.000437812	0.86969
SLC27A6	0	0	0	0	0.479751	0.0534439	0.757233	1.65311e-22	0.077661	0.00101324	0.000574256	0.86969
TYW5	0	0	0	0	0.474138	0.0532739	0.757141	1.46982e-22	0.0777985	-0.00134412	0.000762137	0.870004
JMJD4	0	0	0	0	0.481028	0.0532953	0.756762	1.61281e-22	0.0778457	-0.000591677	0.000335544	0.870004
HOXC8	0	0	0	0	0.479551	0.054499	0.76048	1.5096e-22	0.0779012	-0.00228887	0.00129827	0.870004
TPI1	0	0	0	0	0.482499	0.052997	0.761938	1.6221e-22	0.0779671	-0.00106731	0.000605523	0.870004
LNP1	0	0	0	0	0.481464	0.0527462	0.754139	1.42124e-22	0.0779708	-0.00367882	0.00208716	0.870004
C10orf126	0	0	0	0	0.484083	0.0529486	0.755161	1.35965e-22	0.0780729	-0.0083572	0.00474304	0.870004
TAS2R38	0	0	0	0	0.482712	0.0534455	0.759836	1.50767e-22	0.0780921	-0.00249394	0.0014155	0.870004
ABHD12	0	0	0	0	0.479509	0.0535931	0.763935	1.67331e-22	0.0781139	0.000767607	0.000435707	0.870004
ADGRE5	0	0	0	0	0.475668	0.052923	0.756264	1.74567e-22	0.0781417	-0.000608677	0.000345528	0.870004
ATOH1	0	0	0	0	0.480472	0.0526672	0.761323	1.41848e-22	0.0782765	-0.0016184	0.000919133	0.870004
MRNIP	0	0	0	0	0.484207	0.0529055	0.747399	1.57367e-22	0.0783034	0.00051962	0.000295133	0.870004
OCRL	0	0	0	0	0.480163	0.0539717	0.76264	1.60752e-22	0.0783404	0.00149837	0.000851147	0.870004
U2SURP	0	0	0	0	0.471092	0.0521833	0.757022	1.32444e-22	0.0783414	0.00181305	0.0010299	0.870004
TSACC	0	0	0	0	0.47916	0.0533459	0.757874	1.41258e-22	0.0783608	-0.00310433	0.00176353	0.870004
PEX7	0	0	0	0	0.479705	0.0528259	0.76191	1.4518e-22	0.0783923	-0.00065814	0.000373921	0.870004
ACVR2B	0	0	0	0	0.476553	0.0532547	0.760406	1.28915e-22	0.0784678	0.00141342	0.000803236	0.870322
TMEM247	0	0	0	0	0.475578	0.0536902	0.757046	1.61882e-22	0.0785227	0.00140563	0.000798956	0.87041
MBOAT1	0	0	0	0	0.483261	0.0530798	0.757905	1.49452e-22	0.0786013	0.000996248	0.000566413	0.870762
[truncated: 14,707 more rows]

## Sheet: Table S5 alkaline phosphatase
Table S5. The summary statitics for the association analysis of alkaline phosphatase.
[truncated: 16,383 more rows]

[truncated: 5 more sheets: Table S6 apolipoprotein_a, Table S7 apolipoprotein_b_adj, Table S8 asp aminotransferases, Table S9 calcium, Table S10 cholesterol_adj]
